# Supplementary material for: Antagonistic roles for Ataxin-2 structured and disordered domains in RNP condensation
Source: eLife. 2021 Mar 10;10:e60326. doi: 10.7554/eLife.60326 (PMC7946432; doi:10.7554/eLife.60326)
Supplement: Figure 1—source data 1. — Percentage edits for Atx2-target mRNAs in RNAseq replicates. [file elife-60326-fig1-data1.xlsx]

## Sheet: Ataxin-2
chr	start	end	CG	Replicate 1 edit percentage	Replicate 2 edit percentage	Average edit percentage	chr_coord
chr2L	1009080	1009081	IA-2	19.4	16.9	18.15	chr2L_1009081_IA-2
chr2L	1009440	1009441	IA-2	37.1	29.2	33.15	chr2L_1009441_IA-2
chr2L	1011482	1011483	IA-2	24.4	19	21.7	chr2L_1011483_IA-2
chr2L	10379845	10379846	dpr19	23	20.8	21.9	chr2L_10379846_dpr19
chr2L	11102127	11102128	Reps	16.1	20.6	18.35	chr2L_11102128_Reps
chr2L	1140698	1140699	CG4577	40.9	28.1	34.5	chr2L_1140699_CG4577
chr2L	12396319	12396320	bru-2	22.9	15	18.95	chr2L_12396320_bru-2
chr2L	13503287	13503288	B4	19.6	31	25.3	chr2L_13503288_B4
chr2L	13503306	13503307	B4	16.7	17.9	17.3	chr2L_13503307_B4
chr2L	15064410	15064411	vig	23.47	23.95	23.71	chr2L_15064411_vig
chr2L	17188307	17188308	beat-IIIc	27.2	34.5	30.85	chr2L_17188308_beat-IIIc
chr2L	19179395	19179396	brat	15.6	15.8	15.7	chr2L_19179396_brat
chr2L	19957940	19957941	sick	17.7	28.2	22.95	chr2L_19957941_sick
chr2L	20055344	20055345	sNPF	16.4	24.3	20.35	chr2L_20055345_sNPF
chr2L	20056018	20056019	sNPF	48.4	45.1	46.75	chr2L_20056019_sNPF
chr2L	21135901	21135902	Dap160	22.95	16.1	19.52	chr2L_21135902_Dap160
chr2L	21392924	21392925	nrv3	20.73	18.07	19.4	chr2L_21392925_nrv3
chr2L	22168191	22168192	Clamp	17.02	17.55	17.29	chr2L_22168192_Clamp
chr2L	2877081	2877082	CG8814	29.3	26.5	27.9	chr2L_2877082_CG8814
chr2L	2965942	2965943	Rbp9	24.75	21.93	23.34	chr2L_2965943_Rbp9
chr2L	297368	297369	Hop	22.4	16.7	19.55	chr2L_297369_Hop
chr2L	3358751	3358752	CG34394	26.3	27.8	27.05	chr2L_3358752_CG34394
chr2L	6035121	6035122	mtm	26.7	18.2	22.45	chr2L_6035122_mtm
chr2L	8113894	8113895	Bsg	20.15	25.05	22.6	chr2L_8113895_Bsg
chr2L	8492201	8492202	Dh31	18.55	21.25	19.9	chr2L_8492202_Dh31
chr2L	8525772	8525773	lmgA	37.8	25	31.4	chr2L_8525773_lmgA
chr2L	8525772	8525773	lmgB	37.8	25	31.4	chr2L_8525773_lmgB
chr2L	8686453	8686454	Trs23	21.9	19.5	20.7	chr2L_8686454_Trs23
chr2L	9292530	9292531	Ggamma30A	24.5	17.5	21	chr2L_9292531_Ggamma30A
chr2L	9292829	9292830	Ggamma30A	30.4	25.4	27.9	chr2L_9292830_Ggamma30A
chr2L	9371087	9371088	Shawl	16.7	15.7	16.2	chr2L_9371088_Shawl
chr2R	10357625	10357626	CG42732	31.7	46.4	39.05	chr2R_10357626_CG42732
chr2R	10541456	10541457	lola	27.9	23.6	25.75	chr2R_10541457_lola
chr2R	11293864	11293865	CG18336	18.2	21.2	19.7	chr2R_11293865_CG18336
chr2R	12062421	12062422	Drep-3	17.5	17.5	17.5	chr2R_12062422_Drep-3
chr2R	12338753	12338754	Den1	41.5	37.5	39.5	chr2R_12338754_Den1
chr2R	12517404	12517405	CG8818	28.5	23.3	25.9	chr2R_12517405_CG8818
chr2R	13513577	13513578	Vmat	68.5	60	64.25	chr2R_13513578_Vmat
chr2R	13513663	13513664	Vmat	18.2	17.1	17.65	chr2R_13513664_Vmat
chr2R	13513732	13513733	Vmat	22.6	20.65	21.62	chr2R_13513733_Vmat
chr2R	13513762	13513763	Vmat	42.75	37.55	40.15	chr2R_13513763_Vmat
chr2R	13514350	13514351	Vmat	48.4	30.2	39.3	chr2R_13514351_Vmat
chr2R	13583328	13583329	CG45088	22.8	24.4	23.6	chr2R_13583329_CG45088
chr2R	13583328	13583329	CG6191	22.8	24.4	23.6	chr2R_13583329_CG6191
chr2R	14059308	14059309	mam	16	21.9	18.95	chr2R_14059309_mam
chr2R	14355266	14355267	CG8613	15.8	15.1	15.45	chr2R_14355267_CG8613
chr2R	14355528	14355529	CG8613	19.65	24.85	22.25	chr2R_14355529_CG8613
chr2R	14427738	14427739	phyl	31.5	29.1	30.3	chr2R_14427739_phyl
chr2R	15155520	15155521	igl	19.7	28.6	24.15	chr2R_15155521_igl
chr2R	15199906	15199907	GPHR	26.7	34	30.35	chr2R_15199907_GPHR
chr2R	15385929	15385930	SRPK	16.5	18.6	17.55	chr2R_15385930_SRPK
chr2R	15932449	15932450	Iap2	37.8	34.5	36.15	chr2R_15932450_Iap2
chr2R	15932472	15932473	Iap2	19.4	15.7	17.55	chr2R_15932473_Iap2
chr2R	16029936	16029937	CG8401	16.7	20	18.35	chr2R_16029937_CG8401
chr2R	16558812	16558813	DAT	15.8	31.4	23.6	chr2R_16558813_DAT
chr2R	16561369	16561370	DAT	20.4	21.4	20.9	chr2R_16561370_DAT
chr2R	16650269	16650270	gprs	29.5	32.4	30.95	chr2R_16650270_gprs
chr2R	16943374	16943375	Pkc53E	26.3	21.3	23.8	chr2R_16943375_Pkc53E
chr2R	16995053	16995054	Cbp53E	24.8	26.4	25.6	chr2R_16995054_Cbp53E
chr2R	16995078	16995079	Cbp53E	25.23	28.52	26.88	chr2R_16995079_Cbp53E
chr2R	17375701	17375702	mbl	19.2	18.6	18.9	chr2R_17375702_mbl
chr2R	17442329	17442330	CG18467	25.3	25.8	25.55	chr2R_17442330_CG18467
chr2R	18278779	18278780	sbb	25.5	22.3	23.9	chr2R_18278780_sbb
chr2R	1866961	1866962	CG17684	16.7	15	15.85	chr2R_1866962_CG17684
chr2R	21183348	21183349	tud	23.4	22.5	22.95	chr2R_21183349_tud
chr2R	21620197	21620198	PTP-ER	16.5	17.8	17.15	chr2R_21620198_PTP-ER
chr2R	23389433	23389434	CG3530	22.5	22.6	22.55	chr2R_23389434_CG3530
chr2R	23690228	23690229	Pal2	25.45	20.05	22.75	chr2R_23690229_Pal2
chr2R	23690701	23690702	Pal2	35.8	33.3	34.55	chr2R_23690702_Pal2
chr2R	23906824	23906825	Nap1	18.2	23.1	20.65	chr2R_23906825_Nap1
chr2R	24404734	24404735	SerT	16.3	21.3	18.8	chr2R_24404735_SerT
chr2R	24404821	24404822	SerT	23.5	23.5	23.5	chr2R_24404822_SerT
chr2R	24558544	24558545	ITP	15.9	16.3	16.1	chr2R_24558545_ITP
chr2R	24880256	24880257	CG44247	35.2	30.1	32.65	chr2R_24880257_CG44247
chr2R	24965494	24965495	CG30424	24.5	19.95	22.23	chr2R_24965495_CG30424
chr2R	24968403	24968404	RpL19	20.5	16.1	18.3	chr2R_24968404_RpL19
chr2R	25039561	25039562	Nplp1	26.98	18.45	22.71	chr2R_25039562_Nplp1
chr2R	6011934	6011935	Src42A	25.6	18.3	21.95	chr2R_6011935_Src42A
chr2R	6687327	6687328	Tdc2	22	35.7	28.85	chr2R_6687328_Tdc2
chr2R	6920815	6920816	CG30158	58.1	59.82	58.96	chr2R_6920816_CG30158
chr2R	6921435	6921436	CG30158	34	44.7	39.35	chr2R_6921436_CG30158
chr2R	6921976	6921977	CG30158	57.4	61.2	59.3	chr2R_6921977_CG30158
chr2R	7393653	7393654	CG1707	15	16.4	15.7	chr2R_7393654_CG1707
chr2R	7718070	7718071	CG18812	22.4	16.2	19.3	chr2R_7718071_CG18812
chr2R	8081283	8081284	slv	26.6	18.2	22.4	chr2R_8081284_slv
chr2R	8137317	8137318	Lpin	16.3	21.3	18.8	chr2R_8137318_Lpin
chr2R	8137322	8137323	Lpin	26.1	29.7	27.9	chr2R_8137323_Lpin
chr2R	926167	926168	CG40498	22.9	33.7	28.3	chr2R_926168_CG40498
chr2R	9480019	9480020	Camta	30.9	28	29.45	chr2R_9480020_Camta
chr2R	9910327	9910328	FMRFa	37.9	44.4	41.15	chr2R_9910328_FMRFa
chr2R	9910328	9910329	FMRFa	70.4	70.4	70.4	chr2R_9910329_FMRFa
chr3L	11169107	11169108	wls	16.62	18.4	17.51	chr3L_11169108_wls
chr3L	11498209	11498210	chrb	27.85	39	33.42	chr3L_11498210_chrb
chr3L	11625711	11625712	CG6083	27.5	24.4	25.95	chr3L_11625712_CG6083
chr3L	11689959	11689960	Pallidin	36.1	25.8	30.95	chr3L_11689960_Pallidin
chr3L	1190747	1190748	Trh	24.2	21.3	22.75	chr3L_1190748_Trh
chr3L	11993873	11993874	Grip163	20.7	17.3	19	chr3L_11993874_Grip163
chr3L	12742951	12742952	CG32112	21.5	30.1	25.8	chr3L_12742952_CG32112
chr3L	1309736	1309737	CG2469	18.77	16.85	17.81	chr3L_1309737_CG2469
chr3L	15112510	15112511	CTPsyn	24.93	18.97	21.95	chr3L_15112511_CTPsyn
chr3L	15575751	15575752	CG6498	21.9	22.6	22.25	chr3L_15575752_CG6498
chr3L	15831129	15831130	dbo	17.8	17.3	17.55	chr3L_15831130_dbo
chr3L	16085687	16085688	Taspase1	31	33.3	32.15	chr3L_16085688_Taspase1
chr3L	16371176	16371177	roq	22.7	20.7	21.7	chr3L_16371177_roq
chr3L	16390489	16390490	RAF2	15.4	25	20.2	chr3L_16390490_RAF2
chr3L	16576650	16576651	mbf1	24.6	24.22	24.41	chr3L_16576651_mbf1
chr3L	16787702	16787703	CG9674	24.18	23.8	23.99	chr3L_16787703_CG9674
chr3L	17345071	17345072	Mip	26.47	18.65	22.56	chr3L_17345072_Mip
chr3L	17345086	17345087	Mip	23.38	20.75	22.06	chr3L_17345087_Mip
chr3L	17345219	17345220	Mip	54	56.9	55.45	chr3L_17345220_Mip
chr3L	17345229	17345230	Mip	25.9	28.1	27	chr3L_17345230_Mip
chr3L	17345290	17345291	Mip	48.4	51.4	49.9	chr3L_17345291_Mip
chr3L	17515728	17515729	CG7564	21.3	20.3	20.8	chr3L_17515729_CG7564
chr3L	17546050	17546051	Nedd4	17.2	17.4	17.3	chr3L_17546051_Nedd4
chr3L	1773263	1773264	CG13933	50	37.3	43.65	chr3L_1773264_CG13933
chr3L	17748777	17748778	Ccn	43.2	45.9	44.55	chr3L_17748778_Ccn
chr3L	182674	182675	CG34140	19.3	15.2	17.25	chr3L_182675_CG34140
chr3L	182674	182675	Mkp	19.3	15.2	17.25	chr3L_182675_Mkp
chr3L	19066983	19066984	Mkp3	26.6	18.1	22.35	chr3L_19066984_Mkp3
chr3L	19068870	19068871	Mkp3	22.9	17.1	20	chr3L_19068871_Mkp3
chr3L	19601119	19601120	Taf6	31.1	38.7	34.9	chr3L_19601120_Taf6
chr3L	19810051	19810052	Kap-alpha1	22.5	19.85	21.18	chr3L_19810052_Kap-alpha1
chr3L	20098661	20098662	CG14186	23.9	18.6	21.25	chr3L_20098662_CG14186
chr3L	21628052	21628053	CG11306	19.1	19.3	19.2	chr3L_21628053_CG11306
chr3L	3056247	3056248	CG32486	15.4	15.9	15.65	chr3L_3056248_CG32486
chr3L	3404376	3404377	sty	22	21.1	21.55	chr3L_3404377_sty
chr3L	3466788	3466789	CycJ	28.3	16.7	22.5	chr3L_3466789_CycJ
chr3L	3813706	3813707	CG12006	56.2	36.9	46.55	chr3L_3813707_CG12006
chr3L	3937818	3937819	CG10866	31	25.7	28.35	chr3L_3937819_CG10866
chr3L	3954338	3954339	CG12605	48.4	54.3	51.35	chr3L_3954339_CG12605
chr3L	3954933	3954934	CG12605	53.08	58.23	55.66	chr3L_3954934_CG12605
chr3L	4037801	4037802	CG11593	16.4	20.28	18.34	chr3L_4037802_CG11593
chr3L	4141910	4141911	Akh	36.6	40.95	38.78	chr3L_4141911_Akh
chr3L	4141931	4141932	Akh	17.7	21.8	19.75	chr3L_4141932_Akh
chr3L	4141940	4141941	Akh	36.2	32.4	34.3	chr3L_4141941_Akh
chr3L	4142019	4142020	Akh	80.4	79	79.7	chr3L_4142020_Akh
chr3L	4419609	4419610	DOR	19.82	16.73	18.27	chr3L_4419610_DOR
chr3L	4539835	4539836	CG32243	22	23.7	22.85	chr3L_4539836_CG32243
chr3L	542050	542051	CG17180	31.2	20.65	25.92	chr3L_542051_CG17180
chr3L	542076	542077	CG17180	25	23.1	24.05	chr3L_542077_CG17180
chr3L	575712	575713	hipk	22.2	20.93	21.56	chr3L_575713_hipk
chr3L	575753	575754	hipk	21.1	19.8	20.45	chr3L_575754_hipk
chr3L	577417	577418	hipk	24.68	23	23.84	chr3L_577418_hipk
chr3L	580103	580104	hipk	42.3	31	36.65	chr3L_580104_hipk
chr3L	5811703	5811704	CG5537	21.3	22.7	22	chr3L_5811704_CG5537
chr3L	7052849	7052850	Mp	32.27	38.45	35.36	chr3L_7052850_Mp
chr3L	7059402	7059403	CG8641	23.1	15.1	19.1	chr3L_7059403_CG8641
chr3L	7060195	7060196	CG8641	20	20	20	chr3L_7060196_CG8641
chr3L	7326677	7326678	CG8602	18.57	24.68	21.62	chr3L_7326678_CG8602
chr3L	7705312	7705313	Ank2	15.4	15.1	15.25	chr3L_7705313_Ank2
chr3L	7812611	7812612	Pdp1	17.7	15.75	16.73	chr3L_7812612_Pdp1
chr3L	7932465	7932466	syd	21.98	28.38	25.18	chr3L_7932466_syd
chr3L	8281656	8281657	Dscam4	40.9	45.9	43.4	chr3L_8281657_Dscam4
chr3L	8432694	8432695	Unr	42.03	40.6	41.31	chr3L_8432695_Unr
chr3L	871118	871119	CG12502	39.8	25.5	32.65	chr3L_871119_CG12502
chr3L	8970787	8970788	CG5026	29.8	22.2	26	chr3L_8970788_CG5026
chr3L	9103274	9103275	bol	25.9	28.8	27.35	chr3L_9103275_bol
chr3L	9105410	9105411	bol	18	17.95	17.98	chr3L_9105411_bol
chr3L	9636038	9636039	fry	15.8	16	15.9	chr3L_9636039_fry
chr3L	9722455	9722456	nbs	24.6	26.8	25.7	chr3L_9722456_nbs
chr3L	9786182	9786183	CG8177	20.6	20.6	20.6	chr3L_9786183_CG8177
chr3L	9894876	9894877	CG6707	26.9	15.6	21.25	chr3L_9894877_CG6707
chr3R	10312261	10312262	Bruce	20.7	17.3	19	chr3R_10312262_Bruce
chr3R	11049555	11049556	CG34114	15	16.4	15.7	chr3R_11049556_CG34114
chr3R	11678497	11678498	Taf12	17	18.4	17.7	chr3R_11678498_Taf12
chr3R	11785670	11785671	CG17360	16	18.75	17.38	chr3R_11785671_CG17360
chr3R	11883396	11883397	CG31368	18.8	25	21.9	chr3R_11883397_CG31368
chr3R	12459396	12459397	CG5961	16.9	19.7	18.3	chr3R_12459397_CG5961
chr3R	12512093	12512094	Octbeta3R	16.7	33	24.85	chr3R_12512094_Octbeta3R
chr3R	12512613	12512614	Octbeta3R	19.3	21.73	20.52	chr3R_12512614_Octbeta3R
chr3R	12629867	12629868	Snx3	18.5	23.3	20.9	chr3R_12629868_Snx3
chr3R	12705769	12705770	CG12279	32	20	26	chr3R_12705770_CG12279
chr3R	12746230	12746231	beat-Vc	46.23	57.58	51.91	chr3R_12746231_beat-Vc
chr3R	13224637	13224638	Ace	35	31.5	33.25	chr3R_13224638_Ace
chr3R	13227870	13227871	Ace	25.7	27.8	26.75	chr3R_13227871_Ace
chr3R	13227970	13227971	Ace	42.55	42.65	42.6	chr3R_13227971_Ace
chr3R	13268389	13268390	Su(var)3-7	36.8	26.3	31.55	chr3R_13268390_Su(var)3-7
chr3R	14421335	14421336	natalisin	17.2	16.3	16.75	chr3R_14421336_natalisin
chr3R	14421539	14421540	natalisin	36.5	21.7	29.1	chr3R_14421540_natalisin
chr3R	14421812	14421813	natalisin	21.6	18.2	19.9	chr3R_14421813_natalisin
chr3R	14804349	14804350	btsz	22.8	33.8	28.3	chr3R_14804350_btsz
chr3R	15080604	15080605	CG6966	19.6	17.5	18.55	chr3R_15080605_CG6966
chr3R	15255687	15255688	CG42404	21.8	23.6	22.7	chr3R_15255688_CG42404
chr3R	15326149	15326150	CG6236	41.5	29.23	35.37	chr3R_15326150_CG6236
chr3R	15484786	15484787	Trissin	35.9	38.9	37.4	chr3R_15484787_Trissin
chr3R	16059839	16059840	msps	24.3	17.9	21.1	chr3R_16059840_msps
chr3R	16611235	16611236	NPF	24.5	33.6	29.05	chr3R_16611236_NPF
chr3R	16611267	16611268	NPF	55.12	56.85	55.98	chr3R_16611268_NPF
chr3R	16611317	16611318	NPF	41.5	48.5	45	chr3R_16611318_NPF
chr3R	17731884	17731885	Lgr1	30.6	23.3	26.95	chr3R_17731885_Lgr1
chr3R	18249735	18249736	14-3-3epsilon	41.85	30.77	36.31	chr3R_18249736_14-3-3epsilon
chr3R	18249758	18249759	14-3-3epsilon	28.38	24.18	26.28	chr3R_18249759_14-3-3epsilon
chr3R	18402404	18402405	CG12333	21.62	16.98	19.3	chr3R_18402405_CG12333
chr3R	18416600	18416601	fru	15.2	17.9	16.55	chr3R_18416601_fru
chr3R	18545226	18545227	fru	16.5	16.4	16.45	chr3R_18545227_fru
chr3R	18684727	18684728	CG7708	20.5	16.6	18.55	chr3R_18684728_CG7708
chr3R	18730760	18730761	Cha	26.6	32.2	29.4	chr3R_18730761_Cha
chr3R	19458496	19458497	CG31221	25.42	22.07	23.75	chr3R_19458497_CG31221
chr3R	19929633	19929634	Hs6st	27.9	29.6	28.75	chr3R_19929634_Hs6st
chr3R	20620046	20620047	CG5466	18.8	17.9	18.35	chr3R_20620047_CG5466
chr3R	20911680	20911681	CG31191	19	16	17.5	chr3R_20911681_CG31191
chr3R	21851359	21851360	glec	15.9	18.6	17.25	chr3R_21851360_glec
chr3R	22517906	22517907	Octbeta1R	15.2	15.6	15.4	chr3R_22517907_Octbeta1R
chr3R	22701003	22701004	CCAP	22.1	17.4	19.75	chr3R_22701004_CCAP
chr3R	23692990	23692991	CG10254	25.2	35.1	30.15	chr3R_23692991_CG10254
chr3R	23697691	23697692	prt	37.4	35.5	36.45	chr3R_23697692_prt
chr3R	23698883	23698884	prt	28.6	25.3	26.95	chr3R_23698884_prt
chr3R	24035637	24035638	Miro	21.3	18.25	19.77	chr3R_24035638_Miro
chr3R	24343481	24343482	Ms	32.3	30.4	31.35	chr3R_24343482_Ms
chr3R	24343590	24343591	Ms	36.55	44.75	40.65	chr3R_24343591_Ms
chr3R	24343597	24343598	Ms	42.2	46.1	44.15	chr3R_24343598_Ms
chr3R	24520384	24520385	Pp1alpha-96A	18.15	17.83	17.99	chr3R_24520385_Pp1alpha-96A
chr3R	24760622	24760623	AstA	26.2	17.1	21.65	chr3R_24760623_AstA
chr3R	24760629	24760630	AstA	32.5	19.4	25.95	chr3R_24760630_AstA
chr3R	24874183	24874184	CG3744	17	16.6	16.8	chr3R_24874184_CG3744
chr3R	24919159	24919160	CG11168	16.1	24	20.05	chr3R_24919160_CG11168
chr3R	24934667	24934668	CG11771	22.2	22.65	22.42	chr3R_24934668_CG11771
chr3R	25111176	25111177	CG13650	17.6	17.2	17.4	chr3R_25111177_CG13650
chr3R	25891048	25891049	Lnk	16	15.9	15.95	chr3R_25891049_Lnk
chr3R	26233920	26233921	CG12290	21.7	22.5	22.1	chr3R_26233921_CG12290
chr3R	26254260	26254261	Ald	26.83	22.85	24.84	chr3R_26254261_Ald
chr3R	26950158	26950159	CG6330	22.6	17.9	20.25	chr3R_26950159_CG6330
chr3R	27231027	27231028	CG31064	16.5	15.8	16.15	chr3R_27231028_CG31064
chr3R	27958006	27958007	CG42487	19.3	18.8	19.05	chr3R_27958007_CG42487
chr3R	27958006	27958007	CG4884	19.3	18.8	19.05	chr3R_27958007_CG4884
chr3R	28050111	28050112	CG34362	28.7	25.7	27.2	chr3R_28050112_CG34362
chr3R	28086941	28086942	CG34362	17.6	18.9	18.25	chr3R_28086942_CG34362
chr3R	28087830	28087831	CG34362	16.6	23.2	19.9	chr3R_28087831_CG34362
chr3R	28088797	28088798	CG34362	19.2	18.9	19.05	chr3R_28088798_CG34362
chr3R	28442810	28442811	beat-VI	20.2	43.35	31.77	chr3R_28442811_beat-VI
chr3R	28604876	28604877	Hrb98DE	25.3	28.1	26.7	chr3R_28604877_Hrb98DE
chr3R	29172008	29172009	CG14509	18.8	15.1	16.95	chr3R_29172009_CG14509
chr3R	29486937	29486938	Ptp99A	25.4	25.6	25.5	chr3R_29486938_Ptp99A
chr3R	29630420	29630421	Dop1R2	19.6	17.3	18.45	chr3R_29630421_Dop1R2
chr3R	29674515	29674516	Bub3	47.4	45.5	46.45	chr3R_29674516_Bub3
chr3R	29734530	29734531	Kul	17.5	24.52	21.01	chr3R_29734531_Kul
chr3R	29914297	29914298	Capa	31.88	32.35	32.12	chr3R_29914298_Capa
chr3R	30038733	30038734	janA	20	16.3	18.15	chr3R_30038734_janA
chr3R	31849069	31849070	heph	20.5	17.1	18.8	chr3R_31849070_heph
chr3R	4389531	4389532	tub	18.3	18.1	18.2	chr3R_4389532_tub
chr3R	5468356	5468357	CG12162	19	21.9	20.45	chr3R_5468357_CG12162
chr3R	5811503	5811504	CG11000	48.6	46.2	47.4	chr3R_5811504_CG11000
chr3R	5811505	5811506	CG11000	27.1	18.7	22.9	chr3R_5811506_CG11000
chr3R	5818464	5818465	CG42675	16.7	18.2	17.45	chr3R_5818465_CG42675
chr3R	8339956	8339957	CG9603	18.3	16.3	17.3	chr3R_8339957_CG9603
chr3R	8735594	8735595	CG8202	15.4	21.4	18.4	chr3R_8735595_CG8202
chr3R	8749475	8749476	CG11768	16	17.7	16.85	chr3R_8749476_CG11768
chr3R	8749475	8749476	CG34135	16	17.7	16.85	chr3R_8749476_CG34135
chr3R	9238165	9238166	D1	20.95	25.62	23.29	chr3R_9238166_D1
chr3R	9575365	9575366	Kap-alpha3	22.23	21.95	22.09	chr3R_9575366_Kap-alpha3
chr4	386845	386846	Lin29	20	35.6	27.8	chr4_386846_Lin29
chr4	393929	393930	Lin29	15.5	15.5	15.5	chr4_393930_Lin29
chr4	620551	620552	Eph	23.8	17.8	20.8	chr4_620552_Eph
chrX	1014305	1014306	CG11638	34.3	28.2	31.25	chrX_1014306_CG11638
chrX	10383313	10383314	CG17841	25.4	15.8	20.6	chrX_10383314_CG17841
chrX	10752386	10752387	Rph	22.8	18.4	20.6	chrX_10752387_Rph
chrX	10873988	10873989	CG1637	23.3	35.8	29.55	chrX_10873989_CG1637
chrX	10922787	10922788	CG43901	21.7	20.6	21.15	chrX_10922788_CG43901
chrX	10967983	10967984	CG42339	47.2	42.1	44.65	chrX_10967984_CG42339
chrX	12331302	12331303	Ten-a	48.6	33.3	40.95	chrX_12331303_Ten-a
chrX	12946535	12946536	fne	22.45	26.03	24.24	chrX_12946536_fne
chrX	13287341	13287342	CG15743	23.5	26.8	25.15	chrX_13287342_CG15743
chrX	13999224	13999225	ben	32	32.3	32.15	chrX_13999225_ben
chrX	1474082	1474083	Rab27	38.55	17.98	28.27	chrX_1474083_Rab27
chrX	1474133	1474134	Rab27	32.25	22.45	27.35	chrX_1474134_Rab27
chrX	1474762	1474763	Rab27	22.9	18.5	20.7	chrX_1474763_Rab27
chrX	1485014	1485015	Nmdar2	20.6	17.7	19.15	chrX_1485015_Nmdar2
chrX	15189234	15189235	CG43737	19.8	19.7	19.75	chrX_15189235_CG43737
chrX	15978235	15978236	CG9170	23.6	23.2	23.4	chrX_15978236_CG9170
chrX	16076959	16076960	Tob	22.9	15	18.95	chrX_16076960_Tob
chrX	16298192	16298193	CG3632	15.6	20.98	18.29	chrX_16298193_CG3632
chrX	16317797	16317798	Cyp1	20.65	18.15	19.4	chrX_16317798_Cyp1
chrX	16329335	16329336	CG9919	24.7	24.5	24.6	chrX_16329336_CG9919
chrX	16555347	16555348	Pp2B-14D	17.6	18.25	17.93	chrX_16555348_Pp2B-14D
chrX	17248552	17248553	CG8675	26.2	33.3	29.75	chrX_17248553_CG8675
chrX	17639803	17639804	RhoGAPp190	20.4	29.7	25.05	chrX_17639804_RhoGAPp190
chrX	17847963	17847964	Ucp4A	26.1	24.1	25.1	chrX_17847964_Ucp4A
chrX	17858964	17858965	Arp8	26.9	19	22.95	chrX_17858965_Arp8
chrX	18026710	18026711	CG6867	30.1	23.43	26.77	chrX_18026711_CG6867
chrX	18028094	18028095	CG6867	27.6	23.3	25.45	chrX_18028095_CG6867
chrX	18323840	18323841	CG6123	24.2	19.5	21.85	chrX_18323841_CG6123
chrX	18381637	18381638	betaCOP	20.9	16.7	18.8	chrX_18381638_betaCOP
chrX	18786950	18786951	CG6961	15.1	19.4	17.25	chrX_18786951_CG6961
chrX	18861358	18861359	CG32544	17.88	17.3	17.59	chrX_18861359_CG32544
chrX	19599039	19599040	RpS10b	18.3	15.5	16.9	chrX_19599040_RpS10b
chrX	19624876	19624877	MKP-4	20.4	21.8	21.1	chrX_19624877_MKP-4
chrX	20461552	20461553	CG32506	18.3	17.2	17.75	chrX_20461553_CG32506
chrX	2062681	2062682	CG4281	25	21.4	23.2	chrX_2062682_CG4281
chrX	2093422	2093423	Unc-76	21.5	23.8	22.65	chrX_2093423_Unc-76
chrX	2182781	2182782	pn	17	17.5	17.25	chrX_2182782_pn
chrX	22471909	22471910	CG14613	16.7	15.5	16.1	chrX_22471910_CG14613
chrX	2254793	2254794	CG3078	26.7	35.3	31	chrX_2254794_CG3078
chrX	23083730	23083731	CG17168	29.57	21.8	25.69	chrX_23083731_CG17168
chrX	3321068	3321069	dnc	34.1	30.6	32.35	chrX_3321069_dnc
chrX	3341767	3341768	dnc	18.5	16.7	17.6	chrX_3341768_dnc
chrX	3342369	3342370	dnc	33.6	27.6	30.6	chrX_3342370_dnc
chrX	503511	503512	svr	52.6	39.8	46.2	chrX_503512_svr
chrX	5334325	5334326	CanB	22	16.3	19.15	chrX_5334326_CanB
chrX	5785576	5785577	CG42699	16.9	17.9	17.4	chrX_5785577_CG42699
chrX	5791075	5791076	CR44832	52.5	51.2	51.85	chrX_5791076_CR44832
chrX	5791080	5791081	CR44832	21.18	17.6	19.39	chrX_5791081_CR44832
chrX	6325433	6325434	CG15894	26.2	23.6	24.9	chrX_6325434_CG15894
chrX	6349412	6349413	CG3446	20.8	17.1	18.95	chrX_6349413_CG3446
chrX	6349414	6349415	CG3446	26.9	29.7	28.3	chrX_6349415_CG3446
chrX	7032147	7032148	CG12541	29.4	30.6	30	chrX_7032148_CG12541
chrX	796489	796490	CG16989	17.9	27.3	22.6	chrX_796490_CG16989
chrX	8025899	8025900	Tbh	22.3	15.7	19	chrX_8025900_Tbh
chrX	8087804	8087805	Ubc-E2H	17.8	17.2	17.5	chrX_8087805_Ubc-E2H
chrX	8137721	8137722	Smox	19.8	18.9	19.35	chrX_8137722_Smox
chrX	8155381	8155382	Traf6	18.9	16.2	17.55	chrX_8155382_Traf6
chrX	8155475	8155476	Traf6	34.55	46.05	40.3	chrX_8155476_Traf6
chrX	8239801	8239802	sdt	25.8	15.7	20.75	chrX_8239802_sdt
chrX	8403255	8403256	CG10555	30.02	32.15	31.09	chrX_8403256_CG10555
chrX	9152808	9152809	His3.3B	30.6	27.6	29.1	chrX_9152809_His3.3B
chrX	9172798	9172799	mei-P26	22.5	19.5	21	chrX_9172799_mei-P26
chrX	9188875	9188876	mei-P26	19.5	15.1	17.3	chrX_9188876_mei-P26
chrX	9622390	9622391	CG42797	18.6	29.5	24.05	chrX_9622391_CG42797
