# Supplementary material for: Antagonistic roles for Ataxin-2 structured and disordered domains in RNP condensation
Source: eLife. 2021 Mar 10;10:e60326. doi: 10.7554/eLife.60326 (PMC7946432; doi:10.7554/eLife.60326)
Supplement: Figure 1—source data 2. — Atx2-target mRNAs along with the number of edits. [file elife-60326-fig1-data2.xlsx]

## Sheet: Sheet1
	Ataxin2 - ADARcd
	Number of gene targets = 256
	gene name	number of edits per gene
	Mip	5
	Vmat	5
	hipk	4
	Akh	4
	CG34362	4
	IA-2	3
	dnc	3
	Rab27	3
	CG30158	3
	Ace	3
	natalisin	3
	NPF	3
	Ms	3
	CG12605	2
	bol	2
	CG8641	2
	CG17180	2
	Mkp3	2
	sNPF	2
	B4	2
	Ggamma30A	2
	mei-P26	2
	CG3446	2
	Traf6	2
	CR44832	2
	CG6867	2
	Lin29	2
	Pal2	2
	SerT	2
	CG8613	2
	Lpin	2
	Iap2	2
	DAT	2
	FMRFa	2
	Cbp53E	2
	fru	2
	14-3-3epsilon	2
	Octbeta3R	2
	AstA	2
	CG11000	2
	prt	2
	CG7564	1
	CG2469	1
	Dscam4	1
	Kap-alpha1	1
	CTPsyn	1
	syd	1
	CG14186	1
	Taf6	1
	CG10866	1
	RAF2	1
	CG11306	1
	CG9674	1
	CG32112	1
	Pallidin	1
	Nedd4	1
	chrb	1
	CG12006	1
	dbo	1
	CG8602	1
	CG32486	1
	CG5537	1
	Trh	1
	Mkp	1
	CG6498	1
	DOR	1
	Mp	1
	CG12502	1
	CG13933	1
	Ank2	1
	mbf1	1
	Ccn	1
	CycJ	1
	CG5026	1
	Pdp1	1
	sty	1
	Taspase1	1
	CG8177	1
	CG6083	1
	nbs	1
	CG34140	1
	CG34394	1
	bru-2	1
	sick	1
	Reps	1
	CG4577	1
	Dh31	1
	dpr19	1
	Hop	1
	nrv3	1
	vig	1
	mtm	1
	Trs23	1
	CG8814	1
	beat-IIIc	1
	lmgB	1
	Bsg	1
	lmgA	1
	Rbp9	1
	Clamp	1
	Ubc-E2H	1
	CG17168	1
	CG14613	1
	Unc-76	1
	Smox	1
	CG4281	1
	ben	1
	His3.3B	1
	CG32506	1
	CanB	1
	CG42797	1
	CG43737	1
	Pp2B-14D	1
	Rph	1
	svr	1
	RhoGAPp190	1
	CG1637	1
	pn	1
	betaCOP	1
	Ucp4A	1
	CG9919	1
	sdt	1
	CG6961	1
	CG42339	1
	CG8675	1
	Ten-a	1
	fne	1
	CG12541	1
	CG3078	1
	CG17841	1
	Nmdar2	1
	CG6123	1
	Cyp1	1
	CG9170	1
	CG15894	1
	Tbh	1
	CG11638	1
	CG15743	1
	Eph	1
	CG44247	1
	sbb	1
	CG18336	1
	CG8818	1
	CG17684	1
	slv	1
	lola	1
	phyl	1
	igl	1
	RpL19	1
	CG42732	1
	CG18812	1
	CG18467	1
	PTP-ER	1
	Tdc2	1
	Pkc53E	1
	SRPK	1
	mbl	1
	Nplp1	1
	mam	1
	Camta	1
	gprs	1
	CG40498	1
	CG3530	1
	Nap1	1
	Den1	1
	CG8401	1
	tud	1
	GPHR	1
	ITP	1
	Capa	1
	tub	1
	CG31191	1
	Trissin	1
	CG13650	1
	CG4884	1
	Taf12	1
	Lnk	1
	CG12279	1
	CG6966	1
	btsz	1
	CG10254	1
	Pp1alpha-96A	1
	CG5466	1
	CG6330	1
	Dop1R2	1
	Su(var)3-7	1
	Bub3	1
	Ald	1
	CG42487	1
	Cha	1
	CG12333	1
	CG12290	1
	Kap-alpha3	1
	Snx3	1
	CG14509	1
	Bruce	1
	CG3744	1
	Hs6st	1
	CG31221	1
	CG6236	1
	Octbeta1R	1
	CG12162	1
	CCAP	1
	msps	1
	Lgr1	1
	CG42404	1
	CG5961	1
	Kul	1
	Ptp99A	1
	CG42675	1
	CG31064	1
	CG31368	1
	Hrb98DE	1
	CG9603	1
	glec	1
	Miro	1
	D1	1
	heph	1
	wls	1
	Unr	1
	CG32243	1
	Grip163	1
	fry	1
	CG11593	1
	CG6707	1
	roq	1
	Dap160	1
	brat	1
	Shawl	1
	CG32544	1
	CG3632	1
	CG43901	1
	CG42699	1
	CG10555	1
	Tob	1
	MKP-4	1
	RpS10b	1
	CG16989	1
	Arp8	1
	Drep-3	1
	CG6191	1
	CG45088	1
	CG30424	1
	CG1707	1
	Src42A	1
	CG8202	1
	CG11771	1
	CG34135	1
	janA	1
	beat-VI	1
	CG11768	1
	CG34114	1
	CG7708	1
	beat-Vc	1
	CG11168	1
	CG17360	1
