# Supplementary material for: Antagonistic roles for Ataxin-2 structured and disordered domains in RNP condensation
Source: eLife. 2021 Mar 10;10:e60326. doi: 10.7554/eLife.60326 (PMC7946432; doi:10.7554/eLife.60326)
Supplement: Figure 3—figure supplement 1—source data 1. [file elife-60326-fig3-figsupp1-data1.xlsx]

## Sheet: Sheet1
S.NO	Sample Name	Million reads (Single end-100bp)	% >= Q30	Mean Quality Score	Uniquely Mapped Reads
1	GAL4 - 1	17.68	97.3	38.28	0.8589
2	GAL4 - 2	17.2	97.18	38.22	0.9676
3	GAL4 - 3	16.9	97.18	38.21	0.9696
4	Atx2 RNAi - 1	17	97.17	38.21	0.9656
5	Atx2 RNAi - 2	17.2	97.18	38.21	0.9662
6	Atx2 RNAi - 3	17.46	97.16	38.2	0.967
