# Supplementary material for: Antagonistic roles for Ataxin-2 structured and disordered domains in RNP condensation
Source: eLife. 2021 Mar 10;10:e60326. doi: 10.7554/eLife.60326 (PMC7946432; doi:10.7554/eLife.60326)
Supplement: Figure 3—figure supplement 3—source data 1. [file elife-60326-fig3-figsupp3-data1.xlsx]

## Sheet: Intron Downregulted
Gene	baseMean	log2FoldChange	lfcSE	stat	pvalue	padj
Vmat	170.725	-1.2358	0.307499	-4.01888	5.84754e-05	0.00329507
hipk	160.709	-2.59592	0.758473	-3.42255	0.000620356	0.0179165
CG8177	578.135	-0.881588	0.258266	-3.41349	0.000641356	0.0180115
CG8641	90.9317	-1.14879	0.354261	-3.24278	0.00118369	0.029503
Mkp3	132.121	-2.37134	0.7518	-3.15422	0.00160929	0.0347623
CG17684	1854.45	-2.02129	0.678529	-2.97893	0.00289254	0.0518519
B4	231.344	-1.74879	0.606709	-2.88242	0.00394632	0.0621673
Ten-a	2881.79	-0.959399	0.351605	-2.72863	0.0063598	0.084342
btsz	304.084	-1.92434	0.708044	-2.71782	0.00657126	0.0852783
Cbp53E	763.407	-0.723202	0.277448	-2.60662	0.00914399	0.103338
mbl	1104.45	-1.20996	0.473102	-2.5575	0.0105427	0.111525
beat-VI	335.755	-1.6023	0.66336	-2.41543	0.0157166	0.133316
CG34114	556.503	-1.75674	0.734529	-2.39166	0.0167726	0.138836
CG12541	99.6407	-1.69209	0.716088	-2.36297	0.0181292	0.144661
CG43901	41.2961	-2.07396	0.885373	-2.34247	0.0191568	0.145613
sbb	898.931	-1.31246	0.567168	-2.31406	0.0206645	0.151308
beat-IIIc	240.076	-1.57794	0.681984	-2.31375	0.0206814	0.151308
CG6966	64.3013	-1.52465	0.66338	-2.2983	0.0215447	0.152995
CG6330	34.9507	-0.968503	0.421794	-2.29615	0.0216673	0.152995
Octbeta3R	343.03	-0.80466	0.36335	-2.21456	0.0267904	0.16876
IA-2	413.288	-1.59613	0.722379	-2.20955	0.0271366	0.169674
beat-Vc	135.015	-1.02185	0.468492	-2.18115	0.0291722	0.17565
Mp	499.881	-0.740213	0.339803	-2.17836	0.029379	0.176419
CG42339	261.481	-1.299	0.598406	-2.17076	0.0299491	0.177789
Nmdar2	575.792	-0.842511	0.393528	-2.14092	0.0322806	0.182723
Ggamma30A	590.433	-1.20249	0.572347	-2.10098	0.0356431	0.191265
CG4577	2016.49	-0.646611	0.309022	-2.09244	0.0363988	0.193083
sty	89.5677	-1.68411	0.806099	-2.08921	0.0366891	0.193495
sick	593.696	-1.09347	0.537968	-2.0326	0.0420934	0.206506
phyl	16.1894	-1.75603	0.868057	-2.02294	0.0430796	0.209862
Pkc53E	1550.45	-0.492943	0.244078	-2.01961	0.0434237	0.210692
RhoGAPp190	289.162	-0.553371	0.274622	-2.01503	0.0439017	0.212162
fru	935.125	-0.873161	0.443919	-1.96694	0.0491907	0.222643

## Sheet: Intron Upregulted
Gene	baseMean	log2FoldChange	lfcSE	stat	pvalue	padj
Capa	6.85974	2.55376	0.898327	2.84279	0.00447201
Hrb98DE	888.239	0.637503	0.246051	2.59094	0.00957132	0.105227

## Sheet: Intron NS
Gene	baseMean	log2FoldChange	lfcSE	stat	pvalue	padj
Shawl	207.822	-0.749582	0.38279	-1.95821	0.0502057	0.223851
CG6123	213.773	-0.967204	0.49547	-1.9521	0.0509269	0.224959
sdt	832.695	-0.666679	0.345366	-1.93036	0.0535625	0.231047
mbf1	40.9912	0.858675	0.445554	1.92721	0.0539535	0.231803
Nplp1	345.476	-0.614232	0.331253	-1.85427	0.0637009	0.254175
Dop1R2	576.556	-0.53229	0.292783	-1.81804	0.0690587	0.264253
CG18812	205.498	-0.620104	0.345295	-1.79587	0.0725154	0.270273
mam	274.682	-1.21437	0.681865	-1.78095	0.0749204	0.27373
chrb	28.36	-1.34414	0.757857	-1.77361	0.076128	0.275926
CG34362	374.172	-1.2051	0.681038	-1.76951	0.0768093	0.2767
CG6191	196.035	-0.595316	0.337495	-1.76393	0.0777444	0.278457
CG11000	80.6784	-0.724408	0.411391	-1.76088	0.0782594	0.279202
CG42699	63.0666	-1.06385	0.610182	-1.74349	0.0812483	0.28733
DOR	237.423	-0.559543	0.32352	-1.72955	0.0837111	0.29319
CG14509	580.689	-0.387175	0.224335	-1.72588	0.0843694	0.294081
CG31191	230.479	-0.839058	0.495994	-1.69167	0.0907089	0.304822
Taf12	6.42439	1.35996	0.807578	1.684	0.0921816
fry	168.809	-0.853892	0.507454	-1.6827	0.0924334	0.306623
CG32486	2043.52	-0.522781	0.311891	-1.67617	0.0937054	0.309151
CG9674	402.229	-0.801931	0.479099	-1.67383	0.094164	0.310102
sNPF	100.138	-0.822938	0.49426	-1.66499	0.095915	0.312755
Octbeta1R	341.398	-0.507716	0.306545	-1.65625	0.097671	0.315471
CG42797	31.0586	-0.947607	0.582975	-1.62547	0.104063	0.326734
CG31064	177.89	-0.455819	0.282954	-1.61093	0.107195	0.332419
Drep-3	44.828	-0.573817	0.363136	-1.58017	0.114068	0.343209
Bsg	2052.37	0.415704	0.264231	1.57326	0.115659	0.346165
CG30158	351.407	-0.595432	0.385715	-1.54371	0.122659	0.356765
CG43737	210.738	-0.705127	0.460567	-1.531	0.125769	0.362706
14-3-3epsilon	115.15	-0.529485	0.345858	-1.53093	0.125786	0.362706
CG9170	45.0362	-0.590176	0.392429	-1.5039	0.132606	0.373783
Camta	159.472	-0.6685	0.447931	-1.49242	0.135589	0.379223
Ccn	301.622	-0.779803	0.530541	-1.46983	0.141609	0.384277
CG15894	174.864	-0.558901	0.386985	-1.44424	0.14867	0.396345
CCAP	0.993831	3.44713	2.39834	1.4373	0.150634
CG31221	548.631	-0.726302	0.505821	-1.43589	0.151034	0.400301
Pdp1	1908.34	0.332227	0.234757	1.41519	0.157012	0.409254
heph	4007.42	-0.444956	0.315748	-1.40921	0.158773	0.411607
CanB	43.239	0.504021	0.358226	1.40699	0.159431	0.412265
CG12502	18.5641	-0.717322	0.515384	-1.39182	0.163977	0.419924
igl	273.929	-0.627331	0.458715	-1.36758	0.171442	0.430772
CG8814	4.88494	1.23721	0.906167	1.36532	0.172152
bru-2	95.366	-0.562293	0.416508	-1.35002	0.17701	0.437595
Dap160	143.582	-0.411158	0.312123	-1.3173	0.187739	0.448578
Src42A	299.703	-0.555406	0.424722	-1.30769	0.190978	0.453931
Rbp9	130.532	-0.514978	0.394537	-1.30527	0.1918	0.455291
CG11306	14.8014	0.807319	0.622589	1.29671	0.19473	0.458709
CG42404	32.5584	-0.802636	0.621078	-1.29233	0.196244	0.461206
gprs	2159.39	-0.346615	0.269975	-1.28388	0.199185	0.464936
CG42732	2247.84	-0.471832	0.371082	-1.2715	0.20355	0.46881
mtm	0.697935	-2.87316	2.26734	-1.2672	0.205085
dnc	2374.71	-0.330381	0.263698	-1.25288	0.21025	0.477438
CG11638	37.2185	-0.694	0.560143	-1.23897	0.215356	0.484651
Unc-76	79.1269	-0.889347	0.720952	-1.23357	0.217362	0.487057
CG42675	7.60781	1.01703	0.861757	1.18018	0.237929
dpr19	25.5047	-0.603578	0.520503	-1.15961	0.24621	0.518494
SerT	13.6843	-0.65897	0.580256	-1.13565	0.256101	0.529819
Ucp4A	73.006	0.422171	0.372649	1.13289	0.25726	0.531191
D1	2.67092	1.19369	1.091	1.09412	0.273902
CG8675	0.676452	2.88771	2.6566	1.087	0.277039
Cha	128.171	-0.316887	0.292016	-1.08517	0.277847	0.5513
Miro	43.8903	0.411748	0.382863	1.07545	0.282176	0.555347
CG17841	95.5888	-0.635438	0.592477	-1.07251	0.283491	0.556131
glec	60.4253	-0.334264	0.312391	-1.07002	0.284612	0.557429
Cyp1	18.0779	0.508879	0.476776	1.06733	0.285821	0.558224
syd	104.712	-0.295473	0.278319	-1.06163	0.288402	0.559793
ITP	35.9414	-0.466039	0.43939	-1.06065	0.288848	0.559793
natalisin	2.37712	-1.30974	1.24318	-1.05354	0.292095
CG31368	57.6618	0.451945	0.435851	1.03693	0.299771	0.568555
CG11168	4.5002	0.918683	0.900059	1.02069	0.3074
Lin29	401.967	-0.317032	0.312288	-1.01519	0.310016	0.577451
CG3530	63.7948	-0.314471	0.310806	-1.01179	0.311638	0.579155
Tob	403.725	-0.256818	0.256737	-1.00032	0.317157	0.583708
CG12006	9.54852	0.61686	0.624339	0.988021	0.323142	0.588546
CG13933	20.3876	0.529141	0.538492	0.982634	0.325787	0.591882
CG8401	2.76015	1.14798	1.17844	0.974153	0.32998
CG32544	117.63	0.382401	0.396358	0.964786	0.334652	0.602274
CG32506	221.306	-0.307737	0.323886	-0.950138	0.342042	0.610968
Mkp	20.0845	0.437974	0.461058	0.949932	0.342147	0.610968
wls	3.12759	1.01562	1.08479	0.936243	0.349148
msps	26.4434	-0.421906	0.457128	-0.922949	0.356034	0.624991
CG14613	1.63665	1.32423	1.46598	0.903309	0.366362
CG6236	3.87938	-0.852332	0.947409	-0.899645	0.368309
brat	2155.53	-0.1955	0.224115	-0.872319	0.383035	0.647858
CG40498	2580.55	-0.178717	0.206888	-0.863833	0.387679	0.651323
CG7708	23.9589	-0.368387	0.429499	-0.857712	0.391051	0.653922
RAF2	14.884	0.499253	0.583597	0.855476	0.392288	0.655133
CG10254	42.737	0.336565	0.396794	0.848211	0.396321	0.65874
CG1707	4.06889	0.808543	0.960063	0.842177	0.399689
Trs23	0.490229	2.43232	2.95634	0.822745	0.410653
Lpin	87.9543	-0.26104	0.322531	-0.80935	0.418314	0.68018
Ank2	1372.22	0.228963	0.287113	0.797466	0.42518	0.688576
prt	4.10479	-0.73356	0.959793	-0.76429	0.444694
CycJ	2.11119	-1.06894	1.4002	-0.763419	0.445214
Kap-alpha1	11.6774	0.428636	0.564122	0.759828	0.447357	0.70749
CG4884	0.449122	-2.28398	3.02324	-0.755475	0.449964
betaCOP	3.54728	-0.747141	1.00933	-0.740237	0.459156
Reps	38.3805	0.294717	0.409369	0.719929	0.471569	0.721841
Su(var)3-7	9.30807	-0.441596	0.623635	-0.7081	0.478883	0.725804
PTP-ER	3.92042	0.933062	1.32366	0.70491	0.480866
Smox	9.93235	-0.473077	0.678915	-0.696813	0.48592	0.731679
bol	7359.85	-0.153646	0.220781	-0.695921	0.486479	0.731829
CG32243	6.31739	-0.536946	0.785423	-0.683639	0.494203
CG3744	72.5203	-0.363242	0.531701	-0.68317	0.494499	0.738673
Den1	1.48267	1.18233	1.74109	0.679072	0.497092
CG5026	7.09679	0.452727	0.675267	0.670442	0.502576
CG6707	9.54958	0.442222	0.660722	0.6693	0.503304	0.745734
Nap1	23.8223	0.282974	0.425234	0.665454	0.50576	0.747283
CG13650	9.10512	-0.405167	0.613429	-0.660496	0.508935	0.749128
CG10866	1.10828	-1.21663	1.84841	-0.658203	0.510408
Pallidin	4.95381	-0.529394	0.816681	-0.648226	0.516839
CG5466	1.46156	-0.920672	1.42579	-0.645727	0.518456
tud	10.5269	0.468677	0.728927	0.642969	0.520244	0.756058
Taf6	3.33851	0.712173	1.11061	0.641243	0.521365
Unr	374.941	0.215422	0.338203	0.63696	0.524151	0.757199
DAT	26.121	-0.294286	0.465738	-0.631871	0.527471	0.759584
CG14186	188.391	-0.225264	0.358925	-0.627608	0.530261	0.762375
Ace	1111.74	-0.200181	0.321898	-0.621876	0.534023	0.763831
CG30424	10.2329	0.429856	0.694341	0.619085	0.53586	0.765304
CG10555	3.82989	0.630295	1.03068	0.611533	0.540847
CG17360	6.56154	-0.455633	0.763372	-0.596869	0.550595
RpS10b	4.9503	0.556404	0.935459	0.594792	0.551982
Bub3	0.658076	-1.41267	2.38801	-0.591568	0.55414
Tbh	158.809	-0.221661	0.377322	-0.587458	0.556896	0.781847
Lnk	72.942	-0.184269	0.325801	-0.565587	0.571674	0.792806
Nedd4	255.18	-0.148056	0.262982	-0.562989	0.573443	0.793513
Grip163	0.982033	1.09608	1.95369	0.56103	0.574777
Trh	6.04387	-0.425733	0.769588	-0.553196	0.580129
nrv3	3619.03	-0.125314	0.227849	-0.549988	0.582327	0.796866
Clamp	7.54612	0.360633	0.655731	0.54997	0.58234
FMRFa	2.55878	0.614339	1.11945	0.548785	0.583153
CG7564	926.324	0.141397	0.258777	0.546403	0.584789	0.796866
ben	143.862	-0.185677	0.340187	-0.54581	0.585197	0.796866
CG34394	189.651	-0.183141	0.33901	-0.540223	0.589043	0.798494
Hop	1.38847	-0.891056	1.69357	-0.526141	0.59879
GPHR	6.74802	0.3507	0.708544	0.494959	0.620629
Dscam4	457.845	-0.245651	0.520418	-0.472027	0.636908	0.83072
Tdc2	11.5427	0.268712	0.575197	0.467165	0.640382	0.833161
Rab27	87.3489	0.228836	0.495587	0.461748	0.644262	0.835702
Bruce	26.7389	0.21775	0.475788	0.457661	0.647196	0.83813
CG8818	1.40291	0.69977	1.55252	0.450733	0.652182
Kul	36.1088	-0.178693	0.400356	-0.446336	0.655355	0.840881
Mip	1.71428	0.621083	1.46131	0.425019	0.670823
CG11768	591.245	0.12668	0.302669	0.418543	0.67555	0.854778
CG32112	78.9204	0.140672	0.355954	0.395197	0.692698	0.865634
vig	12.0646	-0.246037	0.626319	-0.39283	0.694445	0.866628
CG12605	96.7666	-0.123993	0.326055	-0.380283	0.703735	0.871645
Dh31	72.8265	0.113091	0.29883	0.378446	0.705099	0.872801
CG5961	0.498692	0.926882	2.58785	0.358166	0.720219
CG44247	28.9295	-0.159372	0.46992	-0.339147	0.734499	0.885562
CG9603	12.5777	0.206063	0.610491	0.337537	0.735712	0.885562
CG1637	39.7989	0.127644	0.380254	0.335681	0.737112	0.885562
roq	5.89802	-0.315496	0.950727	-0.331847	0.740005
AstA	43.2208	0.11956	0.361944	0.330329	0.741152	0.887254
Ms	13.9126	-0.195344	0.594092	-0.32881	0.742299	0.887254
lola	7233.67	-0.0778886	0.239514	-0.325194	0.745035	0.887254
Lgr1	10.1044	-0.192681	0.593245	-0.324792	0.745338	0.887254
mei-P26	68.3795	-0.157477	0.489935	-0.321425	0.747888	0.88911
CG3632	95.2002	0.0900072	0.290019	0.31035	0.756295	0.892752
Rph	118.359	0.0945185	0.307202	0.307676	0.758329	0.893387
CG17180	0.888959	0.60684	2.00695	0.30237	0.76237
SRPK	21.3985	-0.14127	0.482865	-0.292566	0.769854	0.899357
Eph	713.444	0.0672754	0.243727	0.276028	0.782526	0.90612
CTPsyn	312.12	-0.0686646	0.248863	-0.275913	0.782615	0.90612
CG18467	17.2067	0.139888	0.551171	0.253802	0.799649	0.913111
tub	1.54143	0.35659	1.50348	0.237176	0.812521
CG5537	1.58688	-0.388937	1.67917	-0.231624	0.81683
nbs	3.21299	0.24987	1.09243	0.228729	0.81908
Snx3	3.77232	0.218748	0.959362	0.228014	0.819636
CG4281	1.8291	0.330954	1.46565	0.225807	0.821351
janA	1.25838	0.396388	1.77994	0.222698	0.82377
CG2469	9.8441	0.134766	0.619002	0.217714	0.827652	0.927857
NPF	3.70535	0.259425	1.21319	0.213838	0.830674
CG34135	171.989	-0.0744993	0.364441	-0.20442	0.838025	0.934426
CG6083	3.18656	0.195807	0.985799	0.198628	0.842554
Pp1alpha-96A	10.5756	-0.127145	0.645358	-0.197015	0.843816	0.935899
His3.3B	35.2267	-0.0792995	0.403405	-0.196576	0.84416	0.935899
CG9919	66.7611	0.0631176	0.33662	0.187504	0.851266	0.939511
CG8613	2.92435	0.206026	1.2111	0.170115	0.864919
fne	1264.63	0.0368049	0.21889	0.168143	0.86647	0.944103
CG3446	1.46647	-0.243966	1.49963	-0.162684	0.870767
RpL19	7.50946	-0.121003	0.7798	-0.155171	0.876686
CG6867	10.4819	0.0870648	0.606895	0.143459	0.885927	0.951
Pal2	21.5311	-0.0549667	0.469371	-0.117107	0.906775	0.961187
CG17168	2.62874	-0.166963	1.47007	-0.113575	0.909575
Ald	180.304	0.0322199	0.308755	0.104354	0.916888	0.966557
svr	575.512	0.023226	0.241183	0.0963	0.923282	0.969597
dbo	8.349	-0.0680407	0.731435	-0.0930236	0.925885
CG8202	7.56271	0.0462705	0.763369	0.0606136	0.951667
CG3078	24.1398	-0.0288519	0.490678	-0.0588001	0.953111	0.981152
Kap-alpha3	76.3979	0.0166748	0.334599	0.0498351	0.960254	0.98243
Taspase1	1.4341	-0.0631858	1.58767	-0.0397978	0.968254
MKP-4	2.49602	-0.0423812	1.26787	-0.0334271	0.973334
slv	1.67543	0.0455208	1.42116	0.0320306	0.974448
CG12162	0.666632	0.0879407	2.8343	0.0310273	0.975248
CG11593	1.07216	-0.0549453	2.16399	-0.0253908	0.979743
