# Supplementary material for: Antagonistic roles for Ataxin-2 structured and disordered domains in RNP condensation
Source: eLife. 2021 Mar 10;10:e60326. doi: 10.7554/eLife.60326 (PMC7946432; doi:10.7554/eLife.60326)
Supplement: Figure 3—figure supplement 4—source data 1. [file elife-60326-fig3-figsupp4-data1.xlsx]

## Sheet: S2 Atx2 mRNA targets
chr	start	end	CG	Replicate 1 edit Percentage	Replicate 2 edit Percentage	Replicate 3 edit Percentage	Average Edit Percentage	chr_coord
chr2L	1114912	1114913	Pino	10.3	14.3	15.2	13.27	chr2L_1114913_Pino
chr2L	113726	113727	Sam-S	16.9	11.6	11.2	13.23	chr2L_113727_Sam-S
chr2L	11795907	11795908	crol	13	24.2	19.1	18.77	chr2L_11795908_crol
chr2L	11796618	11796619	crol	11.1	20	13.5	14.87	chr2L_11796619_crol
chr2L	11796982	11796983	crol	16.7	13.8	10.6	13.7	chr2L_11796983_crol
chr2L	11798726	11798727	crol	19	11.4	15.4	15.27	chr2L_11798727_crol
chr2L	12045527	12045528	CG6770	12.5	14.8	31	19.43	chr2L_12045528_CG6770
chr2L	12455863	12455864	bun	19.5	14.9	16.9	17.1	chr2L_12455864_bun
chr2L	12456055	12456056	bun	16.1	12.4	17.3	15.27	chr2L_12456056_bun
chr2L	12817616	12817617	kek1	22.2	10.3	11.8	14.77	chr2L_12817617_kek1
chr2L	12821586	12821587	kek1	15.6	25.6	28.9	23.37	chr2L_12821587_kek1
chr2L	12821661	12821662	kek1	10	11.9	12.8	11.57	chr2L_12821662_kek1
chr2L	13167083	13167084	Sir2	13	12.5	16.7	14.07	chr2L_13167084_Sir2
chr2L	16246585	16246586	PRL-1	15	11.8	11.5	12.77	chr2L_16246586_PRL-1
chr2L	18139224	18139225	Socs36E	28.1	28.6	18.2	24.97	chr2L_18139225_Socs36E
chr2L	18139295	18139296	Socs36E	18.2	26.7	28	24.3	chr2L_18139296_Socs36E
chr2L	18532505	18532506	Pde11	10	13	18.2	13.73	chr2L_18532506_Pde11
chr2L	18977579	18977580	Swip-1	10	13.7	11.8	11.83	chr2L_18977580_Swip-1
chr2L	18977609	18977610	Swip-1	16.3	23.5	21.1	20.3	chr2L_18977610_Swip-1
chr2L	18978088	18978089	Swip-1	17.9	20.4	13.3	17.2	chr2L_18978089_Swip-1
chr2L	18978155	18978156	Swip-1	20.5	19.3	13.3	17.7	chr2L_18978156_Swip-1
chr2L	19542868	19542869	ref(2)P	17.3	10.8	10.7	12.93	chr2L_19542869_ref(2)P
chr2L	20903503	20903504	CG43739	10.3	22.7	26.9	19.97	chr2L_20903504_CG43739
chr2L	20903503	20903504	sky	10.3	22.7	26.9	19.97	chr2L_20903504_sky
chr2L	21175660	21175661	bur	13	14.3	11.1	12.8	chr2L_21175661_bur
chr2L	2157215	2157216	aop	17.9	21.6	22.6	20.7	chr2L_2157216_aop
chr2L	2157508	2157509	aop	28.9	14.5	20.5	21.3	chr2L_2157509_aop
chr2L	2159046	2159047	aop	12.2	17.1	21.4	16.9	chr2L_2159047_aop
chr2L	2159917	2159918	aop	15.4	22	15.5	17.63	chr2L_2159918_aop
chr2L	2160159	2160160	aop	13.6	21.7	28.6	21.3	chr2L_2160160_aop
chr2L	21740539	21740540	step	25	15.2	17.5	19.23	chr2L_21740540_step
chr2L	21740668	21740669	step	20.7	17.1	15.4	17.73	chr2L_21740669_step
chr2L	21741721	21741722	step	11.4	14.3	17.9	14.53	chr2L_21741722_step
chr2L	21753306	21753307	step	11.1	21.4	10.8	14.43	chr2L_21753307_step
chr2L	21835417	21835418	tsh	16.1	22.6	13.5	17.4	chr2L_21835418_tsh
chr2L	21836337	21836338	tsh	24	15.2	25.9	21.7	chr2L_21836338_tsh
chr2L	21931641	21931642	CR45334	13.8	19.3	13	15.37	chr2L_21931642_CR45334
chr2L	22166461	22166462	Clamp	16.3	16.4	21.6	18.1	chr2L_22166462_Clamp
chr2L	22168191	22168192	Clamp	11.5	12.5	10	11.33	chr2L_22168192_Clamp
chr2L	22551286	22551287	CG17493	12.5	28.6	20.8	20.63	chr2L_22551287_CG17493
chr2L	23161729	23161730	CG12567	19.4	21.2	16.4	19	chr2L_23161730_CG12567
chr2L	23162810	23162811	CG12567	14.6	12.8	15.6	14.33	chr2L_23162811_CG12567
chr2L	2756494	2756495	Bacc	16.7	15.4	13.3	15.13	chr2L_2756495_Bacc
chr2L	2756944	2756945	Bacc	14.8	13.5	12.5	13.6	chr2L_2756945_Bacc
chr2L	2866975	2866976	CG2991	26.1	25.9	13.3	21.77	chr2L_2866976_CG2991
chr2L	2869063	2869064	CG31694	25	20	29.3	24.77	chr2L_2869064_CG31694
chr2L	297368	297369	Hop	18.5	18.6	27.4	21.5	chr2L_297369_Hop
chr2L	4379411	4379412	Traf4	23.8	13.6	22.2	19.87	chr2L_4379412_Traf4
chr2L	445243	445244	ex	13.7	10.4	10.6	11.57	chr2L_445244_ex
chr2L	540384	540385	ush	19.4	19.2	27.4	22	chr2L_540385_ush
chr2L	6779406	6779407	nrv1	13.2	16.7	12.2	14.03	chr2L_6779407_nrv1
chr2L	7987178	7987179	pes	19.6	12.9	19.5	17.33	chr2L_7987179_pes
chr2L	7987588	7987589	pes	19.4	24.6	11.8	18.6	chr2L_7987589_pes
chr2L	7987791	7987792	pes	23.8	23.1	22.2	23.03	chr2L_7987792_pes
chr2L	7987858	7987859	pes	22.2	20	10.5	17.57	chr2L_7987859_pes
chr2L	7988428	7988429	pes	10	13.5	12.5	12	chr2L_7988429_pes
chr2L	7989323	7989324	pes	18.6	21.3	22.7	20.87	chr2L_7989324_pes
chr2L	7989372	7989373	pes	42.4	20	30	30.8	chr2L_7989373_pes
chr2L	7989452	7989453	pes	28.6	23.8	13.6	22	chr2L_7989453_pes
chr2L	8108514	8108515	Bsg	17	15.7	17.7	16.8	chr2L_8108515_Bsg
chr2L	834188	834189	drongo	13.9	12	13.6	13.17	chr2L_834189_drongo
chr2L	8388617	8388618	CG13384	15.6	13	13.3	13.97	chr2L_8388618_CG13384
chr2L	9903597	9903598	CG13124	14.3	14.3	15	14.53	chr2L_9903598_CG13124
chr2L	9905910	9905911	CG13124	14.3	14	10.7	13	chr2L_9905911_CG13124
chr2L	9906303	9906304	CG13124	23.5	22.2	14.9	20.2	chr2L_9906304_CG13124
chr2R	10615420	10615421	psq	21.9	21.7	16	19.87	chr2R_10615421_psq
chr2R	10615572	10615573	psq	12.8	11.1	11.1	11.67	chr2R_10615573_psq
chr2R	12146528	12146529	CG8878	11.5	12.5	16.7	13.57	chr2R_12146529_CG8878
chr2R	12487679	12487680	fdl	17.6	11.9	14	14.5	chr2R_12487680_fdl
chr2R	12620023	12620024	Galphaq	15.8	23.8	18.2	19.27	chr2R_12620024_Galphaq
chr2R	13227507	13227508	Dp	11.1	12	13.6	12.23	chr2R_13227508_Dp
chr2R	14060897	14060898	Prosap	12.2	10.3	11.1	11.2	chr2R_14060898_Prosap
chr2R	14362526	14362527	Arc2	10.5	18.6	16.7	15.27	chr2R_14362527_Arc2
chr2R	14761500	14761501	Spred	12.5	13	15	13.5	chr2R_14761501_Spred
chr2R	15761603	15761604	CG30089	21.2	15.4	10.5	15.7	chr2R_15761604_CG30089
chr2R	15936239	15936240	Mlf	10.6	14	16.7	13.77	chr2R_15936240_Mlf
chr2R	16137865	16137866	spin	10.3	11.4	13.8	11.83	chr2R_16137866_spin
chr2R	16788478	16788479	CG5522	11.9	14.7	19.2	15.27	chr2R_16788479_CG5522
chr2R	18408244	18408245	GstE8	17.2	13	11.8	14	chr2R_18408245_GstE8
chr2R	18667611	18667612	edl	15.4	25.6	18.4	19.8	chr2R_18667612_edl
chr2R	18667702	18667703	edl	17	20.7	21.5	19.73	chr2R_18667703_edl
chr2R	18667829	18667830	edl	23.3	23.7	28.7	25.23	chr2R_18667830_edl
chr2R	18667943	18667944	edl	31.8	30.4	35.1	32.43	chr2R_18667944_edl
chr2R	18672963	18672964	edl	14.1	16.7	12.9	14.57	chr2R_18672964_edl
chr2R	18673109	18673110	edl	23.7	18	16.7	19.47	chr2R_18673110_edl
chr2R	18673162	18673163	edl	10.2	13.5	11.6	11.77	chr2R_18673163_edl
chr2R	19159144	19159145	ena	13.3	12	14	13.1	chr2R_19159145_ena
chr2R	19161906	19161907	ena	22.2	18.3	27.7	22.73	chr2R_19161907_ena
chr2R	19163157	19163158	ena	15.3	16.9	20.8	17.67	chr2R_19163158_ena
chr2R	22107682	22107683	Vrp1	15.6	10.3	14.8	13.57	chr2R_22107683_Vrp1
chr2R	22854411	22854412	RpL23	40	16.7	27.6	28.1	chr2R_22854412_RpL23
chr2R	22925557	22925558	CG42678	11.5	16	10	12.5	chr2R_22925558_CG42678
chr2R	24313004	24313005	betaTub60D	11.5	13.5	19.4	14.8	chr2R_24313005_betaTub60D
chr2R	24960589	24960590	CG2765	12.1	10.9	18	13.67	chr2R_24960590_CG2765
chr2R	4608701	4608702	p120ctn	14.8	13.5	14.3	14.2	chr2R_4608702_p120ctn
chr2R	5120766	5120767	gus	13	21.4	11.4	15.27	chr2R_5120767_gus
chr2R	5120885	5120886	gus	22.6	16.1	11.1	16.6	chr2R_5120886_gus
chr2R	6667970	6667971	Adf1	30.8	11.4	20.8	21	chr2R_6667971_Adf1
chr2R	7718903	7718904	CG18812	25	15.2	33.3	24.5	chr2R_7718904_CG18812
chr2R	7738803	7738804	CG30497	12.5	12.5	13.7	12.9	chr2R_7738804_CG30497
chr2R	7738803	7738804	CG45093	12.5	12.5	13.7	12.9	chr2R_7738804_CG45093
chr2R	7788896	7788897	CanB2	14.6	15.8	11.8	14.07	chr2R_7788897_CanB2
chr2R	7804602	7804603	Nop17l	15.9	17.4	13.9	15.73	chr2R_7804603_Nop17l
chr2R	7809523	7809524	sax	12.5	10.3	12	11.6	chr2R_7809524_sax
chr2R	7813862	7813863	CG1882	19.7	16.3	31.1	22.37	chr2R_7813863_CG1882
chr2R	7814259	7814260	CG1882	19.1	17.6	20	18.9	chr2R_7814260_CG1882
chr2R	8944474	8944475	CG8230	12.5	10.3	17.9	13.57	chr2R_8944475_CG8230
chr2R	9189217	9189218	CG45085	10.8	14.3	10.5	11.87	chr2R_9189218_CG45085
chr2R	9189217	9189218	CG8026	10.8	14.3	10.5	11.87	chr2R_9189218_CG8026
chr3L	11254084	11254085	scyl	16.3	12.2	11.8	13.43	chr3L_11254085_scyl
chr3L	11254146	11254147	scyl	19.4	12.8	21.9	18.03	chr3L_11254147_scyl
chr3L	11254361	11254362	scyl	15.6	14.8	17.2	15.87	chr3L_11254362_scyl
chr3L	11255073	11255074	scyl	26.9	36	33.3	32.07	chr3L_11255074_scyl
chr3L	11255074	11255075	scyl	37	50	53.8	46.93	chr3L_11255075_scyl
chr3L	11525270	11525271	Mob2	10.7	21.4	11.5	14.53	chr3L_11525271_Mob2
chr3L	12403262	12403263	CG32103	11.4	16.1	11.4	12.97	chr3L_12403263_CG32103
chr3L	12403415	12403416	CG32103	10	16.7	17.1	14.6	chr3L_12403416_CG32103
chr3L	13501679	13501680	Tgi	14.8	13	19.4	15.73	chr3L_13501680_Tgi
chr3L	14070499	14070500	CG32138	11.1	10	20.8	13.97	chr3L_14070500_CG32138
chr3L	14071066	14071067	CG32138	10	16	10.7	12.23	chr3L_14071067_CG32138
chr3L	14230764	14230765	nuf	19.4	14.8	18.2	17.47	chr3L_14230765_nuf
chr3L	142576	142577	Pdk1	12.1	11.4	15.4	12.97	chr3L_142577_Pdk1
chr3L	143855	143856	Pdk1	25	26.7	25	25.57	chr3L_143856_Pdk1
chr3L	15602341	15602342	RhoGAP71E	10	10	10.7	10.23	chr3L_15602342_RhoGAP71E
chr3L	16120830	16120831	Taf4	18.6	24.2	22.2	21.67	chr3L_16120831_Taf4
chr3L	1617536	1617537	CG13926	27.9	27.3	36.7	30.63	chr3L_1617537_CG13926
chr3L	16575986	16575987	mbf1	13	13.7	11.9	12.87	chr3L_16575987_mbf1
chr3L	18398229	18398230	rpr	34.6	15	22.2	23.93	chr3L_18398230_rpr
chr3L	18668582	18668583	Capr	13.5	14.3	15.8	14.53	chr3L_18668583_Capr
chr3L	1867692	1867693	CG12025	10.7	11.6	11.8	11.37	chr3L_1867693_CG12025
chr3L	19095196	19095197	CG11577	28.6	18.5	10.8	19.3	chr3L_19095197_CG11577
chr3L	19809996	19809997	Kap-alpha1	19	12.5	11.5	14.33	chr3L_19809997_Kap-alpha1
chr3L	224521	224522	CG33229	18.2	12	21.9	17.37	chr3L_224522_CG33229
chr3L	224521	224522	CR42862	18.2	12	21.9	17.37	chr3L_224522_CR42862
chr3L	22785007	22785008	SPoCk	11.4	11.4	10.3	11.03	chr3L_22785008_SPoCk
chr3L	22951090	22951091	Mes2	20	16.7	23.4	20.03	chr3L_22951091_Mes2
chr3L	22951388	22951389	Mes2	18.2	12.6	13.7	14.83	chr3L_22951389_Mes2
chr3L	22951506	22951507	Mes2	15.5	20	12.5	16	chr3L_22951507_Mes2
chr3L	22951826	22951827	Mes2	10	14.3	11.9	12.07	chr3L_22951827_Mes2
chr3L	22951856	22951857	Mes2	13.6	14.6	13.9	14.03	chr3L_22951857_Mes2
chr3L	22951890	22951891	Mes2	17.3	11.9	12.2	13.8	chr3L_22951891_Mes2
chr3L	2492264	2492265	CG1146	14.3	14.7	35.9	21.63	chr3L_2492265_CG1146
chr3L	2492264	2492265	CG45186	14.3	14.7	35.9	21.63	chr3L_2492265_CG45186
chr3L	2592715	2592716	dos	19.6	14.7	30.9	21.73	chr3L_2592716_dos
chr3L	3154532	3154533	BtbVII	12.2	16.7	19.6	16.17	chr3L_3154533_BtbVII
chr3L	3196915	3196916	Hsp83	15.8	17	17.7	16.83	chr3L_3196916_Hsp83
chr3L	3234328	3234329	CG11505	21.4	12	12	15.13	chr3L_3234329_CG11505
chr3L	3401784	3401785	sty	20.6	17.6	19.8	19.33	chr3L_3401785_sty
chr3L	3401881	3401882	sty	16.9	15.3	10.5	14.23	chr3L_3401882_sty
chr3L	3402487	3402488	sty	14.7	16.7	19.2	16.87	chr3L_3402488_sty
chr3L	3403535	3403536	sty	12.8	16.2	11.5	13.5	chr3L_3403536_sty
chr3L	3404376	3404377	sty	23.2	21	28.3	24.17	chr3L_3404377_sty
chr3L	3404412	3404413	sty	16.7	13.5	16.7	15.63	chr3L_3404413_sty
chr3L	3404628	3404629	sty	13.9	16.2	14.9	15	chr3L_3404629_sty
chr3L	4037801	4037802	CG11593	28	18.2	42.3	29.5	chr3L_4037802_CG11593
chr3L	4042500	4042501	Rcd5	11.1	15.4	11.1	12.53	chr3L_4042501_Rcd5
chr3L	4140980	4140981	Ras64B	15	26.9	14.3	18.73	chr3L_4140981_Ras64B
chr3L	5160639	5160640	shep	18.3	12.5	14	14.93	chr3L_5160640_shep
chr3L	5160640	5160641	shep	13.3	10.7	10	11.33	chr3L_5160641_shep
chr3L	5163034	5163035	shep	18.9	10.6	16.3	15.27	chr3L_5163035_shep
chr3L	5750128	5750129	DnaJ-1	15.1	16.3	11.2	14.2	chr3L_5750129_DnaJ-1
chr3L	5750139	5750140	DnaJ-1	11.8	12.5	16	13.43	chr3L_5750140_DnaJ-1
chr3L	5750528	5750529	DnaJ-1	14	15.6	19.1	16.23	chr3L_5750529_DnaJ-1
chr3L	575712	575713	hipk	12.4	19.1	19.6	17.03	chr3L_575713_hipk
chr3L	575753	575754	hipk	12.8	16.9	15.5	15.07	chr3L_575754_hipk
chr3L	575776	575777	hipk	11.7	10	13.7	11.8	chr3L_575777_hipk
chr3L	5757899	5757900	Ubp64E	21.7	16.7	13.8	17.4	chr3L_5757900_Ubp64E
chr3L	576377	576378	hipk	12.3	11.6	10.9	11.6	chr3L_576378_hipk
chr3L	577201	577202	hipk	18.8	16.7	16.9	17.47	chr3L_577202_hipk
chr3L	577417	577418	hipk	13.1	12.1	16.7	13.97	chr3L_577418_hipk
chr3L	6949997	6949998	CG10077	12.9	14.6	19.4	15.63	chr3L_6949998_CG10077
chr3L	6950079	6950080	CG10077	22.5	13.2	15.8	17.17	chr3L_6950080_CG10077
chr3L	6950102	6950103	CG10077	13	12	13.2	12.73	chr3L_6950103_CG10077
chr3L	7433674	7433675	Rac2	25.5	18	21.9	21.8	chr3L_7433675_Rac2
chr3L	749625	749626	emc	18.8	22.2	26.2	22.4	chr3L_749626_emc
chr3L	749688	749689	emc	11.1	16.7	19	15.6	chr3L_749689_emc
chr3L	752701	752702	emc	21	10.7	22.4	18.03	chr3L_752702_emc
chr3L	753052	753053	emc	10.4	12.5	16.4	13.1	chr3L_753053_emc
chr3L	8678590	8678591	h	25	22.2	11.5	19.57	chr3L_8678591_h
chr3L	9374363	9374364	Hsp22	10.3	16.4	12.9	13.2	chr3L_9374364_Hsp22
chr3L	9374363	9374364	Hsp67Bb	10.3	16.4	12.9	13.2	chr3L_9374364_Hsp67Bb
chr3L	9374485	9374486	Hsp22	53.3	28.6	42.6	41.5	chr3L_9374486_Hsp22
chr3L	9374485	9374486	Hsp67Bb	53.3	28.6	42.6	41.5	chr3L_9374486_Hsp67Bb
chr3L	9376623	9376624	Hsp26	15.2	17.6	15.3	16.03	chr3L_9376624_Hsp26
chr3L	9376892	9376893	Hsp26	15.5	13	11	13.17	chr3L_9376893_Hsp26
chr3L	9377090	9377091	Hsp26	13.7	16.4	18.1	16.07	chr3L_9377091_Hsp26
chr3L	9716350	9716351	vsg	10.5	20.5	10.8	13.93	chr3L_9716351_vsg
chr3L	997356	997357	trio	10.3	15.6	28.8	18.23	chr3L_997357_trio
chr3L	999618	999619	trio	21.5	13.2	21.9	18.87	chr3L_999619_trio
chr3R	10118984	10118985	CG3940	13.3	13.3	19.2	15.27	chr3R_10118985_CG3940
chr3R	10399725	10399726	cwo	14.8	10.7	19	14.83	chr3R_10399726_cwo
chr3R	11633349	11633350	Csk	23.8	26.7	10.3	20.27	chr3R_11633350_Csk
chr3R	11633393	11633394	Csk	17.2	20	15	17.4	chr3R_11633394_Csk
chr3R	12373600	12373601	GstD3	21.2	25.6	19.5	22.1	chr3R_12373601_GstD3
chr3R	12373662	12373663	GstD3	12.1	13.9	11.9	12.63	chr3R_12373663_GstD3
chr3R	12985418	12985419	Paip2	12	13.9	30.3	18.73	chr3R_12985419_Paip2
chr3R	15413253	15413254	Atx2	39.7	36.7	38.2	38.2	chr3R_15413254_Atx2
chr3R	15414212	15414213	Atx2	13.3	14.9	15.4	14.53	chr3R_15414213_Atx2
chr3R	15414323	15414324	Atx2	20.8	19	18.7	19.5	chr3R_15414324_Atx2
chr3R	15414613	15414614	Atx2	42.4	45	43	43.47	chr3R_15414614_Atx2
chr3R	15414642	15414643	Atx2	22.7	25.2	23.5	23.8	chr3R_15414643_Atx2
chr3R	16145910	16145911	CG5903	10.3	13	22.2	15.17	chr3R_16145911_CG5903
chr3R	16197456	16197457	sra	11.5	13.6	39.1	21.4	chr3R_16197457_sra
chr3R	16296685	16296686	gish	21.3	13.6	12.2	15.7	chr3R_16296686_gish
chr3R	16350667	16350668	Manf	12.8	10	15.4	12.73	chr3R_16350668_Manf
chr3R	18290575	18290576	l(3)05822	11.1	10	12.9	11.33	chr3R_18290576_l(3)05822
chr3R	18587056	18587057	CG7694	14.7	16.2	16.7	15.87	chr3R_18587057_CG7694
chr3R	18587056	18587057	fray	14.7	16.2	16.7	15.87	chr3R_18587057_fray
chr3R	18588442	18588443	CG7694	33.3	18.6	18.8	23.57	chr3R_18588443_CG7694
chr3R	18588442	18588443	fray	33.3	18.6	18.8	23.57	chr3R_18588443_fray
chr3R	18588491	18588492	CG7694	13.3	13	15.6	13.97	chr3R_18588492_CG7694
chr3R	18588491	18588492	fray	13.3	13	15.6	13.97	chr3R_18588492_fray
chr3R	18588709	18588710	CG7694	15.6	15.2	24.3	18.37	chr3R_18588710_CG7694
chr3R	18588709	18588710	fray	15.6	15.2	24.3	18.37	chr3R_18588710_fray
chr3R	18650557	18650558	CG31224	17.9	11.4	15.6	14.97	chr3R_18650558_CG31224
chr3R	18925981	18925982	Xrp1	14.4	10.5	13.8	12.9	chr3R_18925982_Xrp1
chr3R	20630639	20630640	Pi3K92E	18.2	16.7	23.8	19.57	chr3R_20630640_Pi3K92E
chr3R	20630645	20630646	Pi3K92E	14.3	13	14.3	13.87	chr3R_20630646_Pi3K92E
chr3R	20824922	20824923	AdSS	14.1	12.9	16.5	14.5	chr3R_20824923_AdSS
chr3R	21298203	21298204	Hsromega	10.9	11.5	11.4	11.27	chr3R_21298204_Hsromega
chr3R	21298331	21298332	Hsromega	19.1	30.9	22	24	chr3R_21298332_Hsromega
chr3R	21526714	21526715	CG7956	15.2	27.9	22.7	21.93	chr3R_21526715_CG7956
chr3R	21526731	21526732	CG7956	10.7	21.4	15	15.7	chr3R_21526732_CG7956
chr3R	21623383	21623384	E2f	11.5	15	11.5	12.67	chr3R_21623384_E2f
chr3R	22520342	22520343	CG5346	17.9	16.3	22.1	18.77	chr3R_22520343_CG5346
chr3R	22527016	22527017	CG5346	14.7	16.5	10.4	13.87	chr3R_22527017_CG5346
chr3R	22528397	22528398	CG5346	14.6	15.4	13.6	14.53	chr3R_22528398_CG5346
chr3R	22620708	22620709	loco	17.9	14.1	21.6	17.87	chr3R_22620709_loco
chr3R	23291250	23291251	pnt	12.1	11	15.8	12.97	chr3R_23291251_pnt
chr3R	23295112	23295113	pnt	22.2	18.8	18.4	19.8	chr3R_23295113_pnt
chr3R	23720813	23720814	CG10232	16.7	17.5	15.2	16.47	chr3R_23720814_CG10232
chr3R	23720872	23720873	CG10232	18.2	14.3	10	14.17	chr3R_23720873_CG10232
chr3R	24043901	24043902	Rox8	11.4	21.1	25	19.17	chr3R_24043902_Rox8
chr3R	24044775	24044776	Rox8	10.8	19	11.8	13.87	chr3R_24044776_Rox8
chr3R	24045713	24045714	Rox8	27.9	11.1	25	21.33	chr3R_24045714_Rox8
chr3R	24519724	24519725	Pp1alpha-96A	10.8	12.9	10.3	11.33	chr3R_24519725_Pp1alpha-96A
chr3R	24559370	24559371	CG13624	19.5	17.6	17.9	18.33	chr3R_24559371_CG13624
chr3R	24562310	24562311	CG13624	12.5	13.6	13	13.03	chr3R_24562311_CG13624
chr3R	25886843	25886844	SppL	20.8	16	17.9	18.23	chr3R_25886844_SppL
chr3R	26129174	26129175	CG31324	10.9	12	11.1	11.33	chr3R_26129175_CG31324
chr3R	26130242	26130243	CG31324	15.2	15.8	26.9	19.3	chr3R_26130243_CG31324
chr3R	26233256	26233257	CG12290	22.7	20	28.6	23.77	chr3R_26233257_CG12290
chr3R	26873026	26873027	Rb97D	17.9	20.5	17.6	18.67	chr3R_26873027_Rb97D
chr3R	27242584	27242585	CG18766	22.6	15	14.7	17.43	chr3R_27242585_CG18766
chr3R	27291351	27291352	Hmu	11.3	10.5	11.9	11.23	chr3R_27291352_Hmu
chr3R	30363123	30363124	hdc	10	20	13.8	14.6	chr3R_30363124_hdc
chr3R	30365820	30365821	hdc	15.2	20.5	28.1	21.27	chr3R_30365821_hdc
chr3R	30578292	30578293	tmod	23.3	12.2	26.2	20.57	chr3R_30578293_tmod
chr3R	30578612	30578613	tmod	12.1	16.4	11.7	13.4	chr3R_30578613_tmod
chr3R	30784318	30784319	zfh1	10.7	14.5	20	15.07	chr3R_30784319_zfh1
chr3R	30784354	30784355	zfh1	21.2	11.8	14	15.67	chr3R_30784355_zfh1
chr3R	30785242	30785243	zfh1	13	13.3	15	13.77	chr3R_30785243_zfh1
chr3R	30785344	30785345	zfh1	19.5	11.8	10.3	13.87	chr3R_30785345_zfh1
chr3R	30786051	30786052	zfh1	17.4	10.9	11.7	13.33	chr3R_30786052_zfh1
chr3R	30786099	30786100	zfh1	26.7	33.3	28.6	29.53	chr3R_30786100_zfh1
chr3R	30786205	30786206	zfh1	23.3	16.2	16.7	18.73	chr3R_30786206_zfh1
chr3R	30786206	30786207	zfh1	19	10.5	13.9	14.47	chr3R_30786207_zfh1
chr3R	30787631	30787632	zfh1	13.5	19.7	13.3	15.5	chr3R_30787632_zfh1
chr3R	30787885	30787886	zfh1	21.9	25.8	20	22.57	chr3R_30787886_zfh1
chr3R	30787896	30787897	zfh1	14	15.3	13.3	14.2	chr3R_30787897_zfh1
chr3R	30788760	30788761	zfh1	21.9	23.7	24.2	23.27	chr3R_30788761_zfh1
chr3R	30789102	30789103	zfh1	12.2	12.2	15.4	13.27	chr3R_30789103_zfh1
chr3R	30817671	30817672	cindr	13.5	12.7	10.4	12.2	chr3R_30817672_cindr
chr3R	30826345	30826346	cindr	17.5	16.4	19.3	17.73	chr3R_30826346_cindr
chr3R	31055656	31055657	dco	10	13.2	11.1	11.43	chr3R_31055657_dco
chr3R	31056317	31056318	dco	14.3	15.2	17.6	15.7	chr3R_31056318_dco
chr3R	31597044	31597045	CycG	16.4	11.4	20.9	16.23	chr3R_31597045_CycG
chr3R	31597303	31597304	CycG	17.2	12.3	10.8	13.43	chr3R_31597304_CycG
chr3R	31730956	31730957	ttk	19.2	25	23.8	22.67	chr3R_31730957_ttk
chr3R	4465489	4465490	CG31523	10.7	12.2	16.7	13.2	chr3R_4465490_CG31523
chr3R	4467983	4467984	CG31523	12.5	14.3	10.3	12.37	chr3R_4467984_CG31523
chr3R	5459033	5459034	PEK	12.5	10.7	17.9	13.7	chr3R_5459034_PEK
chr3R	6004437	6004438	Rm62	18.4	14.8	20.4	17.87	chr3R_6004438_Rm62
chr3R	8815294	8815295	CG9821	12.8	17.6	13.5	14.63	chr3R_8815295_CG9821
chr3R	8816491	8816492	CG9821	15	24.1	17.9	19	chr3R_8816492_CG9821
chr3R	8818312	8818313	CG9821	17.9	11.4	14.3	14.53	chr3R_8818313_CG9821
chr3R	8820482	8820483	CG9821	15.6	14.3	20	16.63	chr3R_8820483_CG9821
chr3R	9354960	9354961	CG45050	21.8	11.4	15.2	16.13	chr3R_9354961_CG45050
chr4	1048081	1048082	CaMKII	23.3	10.7	10	14.67	chr4_1048082_CaMKII
chrX	10327453	10327454	CG2909	12.9	15.4	13.8	14.03	chrX_10327454_CG2909
chrX	10833176	10833177	sbr	13.6	13	16	14.2	chrX_10833177_sbr
chrX	11360498	11360499	Pa1	20	15	11.5	15.5	chrX_11360499_Pa1
chrX	1218079	1218080	CG3638	10.6	15.4	16.7	14.23	chrX_1218080_CG3638
chrX	13380422	13380423	Rbp1-like	13	13.6	11.5	12.7	chrX_13380423_Rbp1-like
chrX	13614216	13614217	tth	18.2	20.8	14.3	17.77	chrX_13614217_tth
chrX	1396482	1396483	CG11448	11.1	13.6	12	12.23	chrX_1396483_CG11448
chrX	15864765	15864766	Gbeta13F	10	19.2	15.4	14.87	chrX_15864766_Gbeta13F
chrX	17135383	17135384	CG5004	18.2	23.4	15.8	19.13	chrX_17135384_CG5004
chrX	1781851	1781852	Adar	14.9	16.3	16.1	15.77	chrX_1781852_Adar
chrX	1781851	1781852	CG42666	14.9	16.3	16.1	15.77	chrX_1781852_CG42666
chrX	18636067	18636068	Rip11	23.4	23	21.4	22.6	chrX_18636068_Rip11
chrX	19136544	19136545	RhoGAP18B	17.9	18.8	14.3	17	chrX_19136545_RhoGAP18B
chrX	19144110	19144111	RhoGAP18B	16	22	15.6	17.87	chrX_19144111_RhoGAP18B
chrX	19144298	19144299	RhoGAP18B	11.4	11	12.8	11.73	chrX_19144299_RhoGAP18B
chrX	2044378	2044379	moody	28.3	36.6	31.3	32.07	chrX_2044379_moody
chrX	2092113	2092114	Unc-76	10	16.7	18.1	14.93	chrX_2092114_Unc-76
chrX	2092705	2092706	Unc-76	17.5	14.7	10	14.07	chrX_2092706_Unc-76
chrX	2092846	2092847	Unc-76	13.8	16	16.9	15.57	chrX_2092847_Unc-76
chrX	2093073	2093074	Unc-76	13.8	13.8	13.3	13.63	chrX_2093074_Unc-76
chrX	2093209	2093210	Unc-76	19	14.3	10	14.43	chrX_2093210_Unc-76
chrX	2093427	2093428	Unc-76	22.7	14.3	30	22.33	chrX_2093428_Unc-76
chrX	21035579	21035580	Ntf-2	11.4	14.3	13.9	13.2	chrX_21035580_Ntf-2
chrX	2265135	2265136	CG2924	13.5	14.7	18.8	15.67	chrX_2265136_CG2924
chrX	2269299	2269300	CG2924	12.5	16	13.8	14.1	chrX_2269300_CG2924
chrX	2791214	2791215	w	100	100	100	100	chrX_2791215_w
chrX	3384781	3384782	CR44999	13.9	16.7	13.5	14.7	chrX_3384782_CR44999
chrX	3384781	3384782	dm	13.9	16.7	13.5	14.7	chrX_3384782_dm
chrX	3385725	3385726	CR44999	15.6	11.5	14.7	13.93	chrX_3385726_CR44999
chrX	3385725	3385726	dm	15.6	11.5	14.7	13.93	chrX_3385726_dm
chrX	3386150	3386151	CR44999	19.2	19	15.2	17.8	chrX_3386151_CR44999
chrX	3386150	3386151	dm	19.2	19	15.2	17.8	chrX_3386151_dm
chrX	3386400	3386401	CR44999	47.6	35	10	30.87	chrX_3386401_CR44999
chrX	3386400	3386401	dm	47.6	35	10	30.87	chrX_3386401_dm
chrX	3388640	3388641	CR44999	10	31.8	27.3	23.03	chrX_3388641_CR44999
chrX	3388640	3388641	dm	10	31.8	27.3	23.03	chrX_3388641_dm
chrX	5518670	5518671	CG12730	27.3	16.2	17.1	20.2	chrX_5518671_CG12730
chrX	6780942	6780943	C3G	25.7	11.8	13.3	16.93	chrX_6780943_C3G
