# Supplementary material for: Antagonistic roles for Ataxin-2 structured and disordered domains in RNP condensation
Source: eLife. 2021 Mar 10;10:e60326. doi: 10.7554/eLife.60326 (PMC7946432; doi:10.7554/eLife.60326)
Supplement: Figure 3—figure supplement 5—source data 1. [file elife-60326-fig3-figsupp5-data1.xlsx]

## Sheet: S2 Atx2 KD Downregulated
Gene	baseMean	log2FoldChange	lfcSE	stat	pvalue	padj
Swip-1	6164.41	-0.325069	0.0419453	-7.74983	9.20147e-15	4.12118e-12
sty	19171.6	-0.308847	0.0440637	-7.00909	2.39865e-12	5.70729e-10
CG2765	1799.24	-0.431691	0.0633423	-6.81521	9.41284e-12	2.0477e-09
CG31523	5933.91	-0.305686	0.0451467	-6.77096	1.27928e-11	2.70567e-09
ena	12350.2	-0.356379	0.052723	-6.75946	1.38505e-11	2.8502e-09
CG32138	10049	-0.271321	0.0468588	-5.79019	7.03049e-09	6.37264e-07
zfh1	13163.3	-0.290029	0.0532582	-5.44573	5.15939e-08	3.30114e-06
Sam-S	6684.41	-0.217309	0.0413312	-5.25773	1.45843e-07	7.87551e-06
CG3638	8577.03	-0.302567	0.0588961	-5.1373	2.78709e-07	1.37798e-05
betaTub60D	9006.44	-0.222978	0.0434248	-5.13481	2.82434e-07	1.38739e-05
Hsp83	46625.4	-0.178491	0.0353067	-5.05545	4.29386e-07	1.9935e-05
shep	10969	-0.203952	0.0417225	-4.88829	1.01715e-06	4.16376e-05
Dp	3557.07	-0.216388	0.0471967	-4.58482	4.5438e-06	0.000141789
gish	2850.15	-0.254566	0.0556655	-4.57314	4.80462e-06	0.00014751
aop	6058.23	-0.199903	0.0451117	-4.43128	9.36758e-06	0.000248518
moody	2190.46	-0.265734	0.0610098	-4.3556	1.32703e-05	0.000328216
Rm62	12232.8	-0.167688	0.03908	-4.29089	1.77962e-05	0.000420808
spin	1483.57	-0.304263	0.0743813	-4.09059	4.30283e-05	0.000853171
dm	3507.55	-0.184311	0.0451635	-4.08096	4.48499e-05	0.000882397
hipk	20943.3	-0.395595	0.100581	-3.93308	8.3865e-05	0.001419
Rip11	11082.8	-0.162335	0.0414119	-3.92002	8.85428e-05	0.00147313
CanB2	3749.57	-0.17205	0.0440236	-3.90814	9.30097e-05	0.00154287
Unc-76	7593.13	-0.165076	0.0427625	-3.86031	0.000113246	0.00179636
Prosap	9739.98	-0.362371	0.095247	-3.80454	0.000142066	0.00213772
Pde11	2300.14	-0.232415	0.0625456	-3.71593	0.000202458	0.0027775
crol	6430.66	-0.165287	0.045837	-3.60598	0.000310974	0.00391507
Capr	4547.26	-0.159146	0.0441349	-3.60589	0.000311087	0.00391507
nrv1	2935.64	-0.165384	0.0458971	-3.60336	0.000314129	0.00392738
tth	1614.52	-0.203574	0.0573136	-3.55194	0.000382402	0.00452113
RhoGAP71E	4009.06	-0.184476	0.0520152	-3.54658	0.000390274	0.00458571
ush	6310.85	-0.18432	0.0525297	-3.50888	0.000449992	0.00515224
emc	2465.74	-0.168037	0.0480649	-3.49604	0.00047221	0.0053503
SPoCk	3788.31	-0.160261	0.0458503	-3.49531	0.000473514	0.00535711
E2f	4376.41	-0.16301	0.0474184	-3.4377	0.000586682	0.00629155
ex	4264.45	-0.18561	0.0556535	-3.33509	0.000852707	0.00829184
trio	7651.17	-0.150318	0.0453196	-3.31683	0.000910441	0.00864352
pes	3572.96	-0.151117	0.045784	-3.30066	0.000964584	0.00901085
Ras64B	2204.15	-0.167825	0.0511411	-3.2816	0.00103218	0.00947063
CG31224	2001.59	-0.184168	0.0564408	-3.26303	0.00110228	0.00992051
Hop	7913.91	-0.12343	0.0383749	-3.21643	0.00129795	0.011165
RhoGAP18B	10224.6	-0.146023	0.0459758	-3.17609	0.00149273	0.0124337
psq	4657.62	-0.158436	0.0499274	-3.17333	0.00150701	0.0124993
l(3)05822	2098.28	-0.162189	0.0523021	-3.101	0.00192869	0.0152177
Ubp64E	4563.97	-0.142748	0.0461832	-3.09091	0.00199547	0.0155831
Galphaq	981.877	-0.201026	0.0655778	-3.06546	0.00217332	0.0165093
bur	1662.16	-0.161496	0.052966	-3.04905	0.00229565	0.0171869
tsh	3043.75	-0.146186	0.0488251	-2.99409	0.00275269	0.0194019
hdc	6566.14	-0.142391	0.0477471	-2.98219	0.00286195	0.0199916
cwo	1936.49	-0.163291	0.0558592	-2.92326	0.00346385	0.0230742
Taf4	2797.2	-0.152615	0.0524883	-2.9076	0.00364212	0.023847
step	4912.08	-0.137821	0.0479836	-2.87226	0.00407544	0.0259046
Sir2	1334.03	-0.164287	0.0587473	-2.7965	0.00516598	0.0311254
CG31324	2563.24	-0.134299	0.0480953	-2.79234	0.00523277	0.0313966
Bacc	19868	-0.106798	0.0384367	-2.77855	0.00546017	0.0323531
CG45186	11842.9	-0.13051	0.0479614	-2.72115	0.00650554	0.0369029
fray	1443.94	-0.144488	0.0549032	-2.63169	0.00849624	0.0452476
Adf1	1069.53	-0.166015	0.0640784	-2.59081	0.009575	0.0494427
p120ctn	2825.69	-0.138719	0.0541419	-2.56214	0.0104029	0.0526396
Bsg	7970	-0.108061	0.0433436	-2.49312	0.0126627	0.060676
CG5522	4439.03	-0.116525	0.0468621	-2.48656	0.0128985	0.0614577
Mlf	4233.63	-0.115219	0.0469073	-2.45632	0.014037	0.0656703
BtbVII	4659.62	-0.106586	0.0440721	-2.41846	0.0155865	0.0705984
CG33229	1591.68	-0.139181	0.0576067	-2.41606	0.0156893	0.0709375
cindr	9632.44	-0.0967436	0.040562	-2.38508	0.0170754	0.0754928
pnt	10869.1	-0.113074	0.0476183	-2.37458	0.0175687	0.0769667
Pi3K92E	2803.7	-0.115317	0.0488825	-2.35907	0.0183208	0.079711
CG11505	5963.04	-0.128305	0.0544357	-2.357	0.0184234	0.0801118
drongo	3166.93	-0.11821	0.0504886	-2.34132	0.0192157	0.0827535
C3G	2715.08	-0.120183	0.0530611	-2.265	0.023513	0.0946235
Xrp1	14024.8	-0.0918895	0.0406419	-2.26095	0.0237622	0.0952739
Rox8	4894.88	-0.101644	0.0450036	-2.25858	0.0239096	0.0956634
CG12567	2744.33	-0.113133	0.0514191	-2.20022	0.0277916	0.106441
CG30089	2921.99	-0.118499	0.0551064	-2.15038	0.0315255	0.116578
AdSS	5310.57	-0.0892419	0.0416481	-2.14276	0.0321322	0.118337
Traf4	860.107	-0.152731	0.0714648	-2.13715	0.0325859	0.119513
CG31694	1735.29	-0.111375	0.052361	-2.12707	0.0334142	0.121623
CG5004	3506.45	-0.0973729	0.0463513	-2.10076	0.0356621	0.127719
CG13624	4470.42	-0.0966223	0.0463676	-2.08383	0.0371755	0.13147
Rbp1-like	1274.69	-0.135955	0.0653904	-2.07914	0.0376048	0.132434
tmod	5285.58	-0.0926606	0.0457618	-2.02484	0.0428833	0.145182
loco	5026.01	-0.081693	0.0406434	-2.00999	0.0444317	0.149361
CG8878	2161.93	-0.0990914	0.0503272	-1.96894	0.0489598	0.16075
Vrp1	1823.25	-0.132148	0.0673034	-1.96347	0.0495914	0.162125

## Sheet: S2 Atx2 KD Upregulated
Gene	baseMean	log2FoldChange	lfcSE	stat	pvalue	padj
Atx2	6792.47	1.87599	0.155286	12.0809	1.33305e-33	1.01498e-29
CR42862	20272.6	0.455292	0.049637	9.17244	4.62435e-20	5.02997e-17
Hsromega	1648.71	0.461569	0.070421	6.55443	5.58543e-11	8.67907e-09
CG6770	930.086	0.33667	0.0672144	5.0089	5.47424e-07	2.42331e-05
h	1297.51	0.211615	0.0590202	3.58547	0.000336468	0.00413204
Paip2	1954.56	0.155706	0.0502424	3.0991	0.0019411	0.0152681
CG10077	5811.99	0.153806	0.0496405	3.09841	0.00194565	0.0152723
RpL23	41377.1	0.141015	0.0460523	3.06206	0.0021982	0.0166042
CG3940	695.788	0.230059	0.0755276	3.04603	0.00231883	0.0172755
Manf	1626.75	0.190747	0.0627894	3.0379	0.00238237	0.0175769
CG5903	1400.57	0.174135	0.0577449	3.01559	0.00256484	0.0184581
scyl	1313.87	0.18618	0.0622025	2.99313	0.00276133	0.0194314
CG2909	1930.06	0.166263	0.0571952	2.90694	0.00364988	0.0238542
CG2991	1847.19	0.132219	0.0514348	2.57062	0.0101518	0.0515648
Hsp26	330.179	0.510365	0.214612	2.37808	0.0174029	0.076372
CG11577	1176.23	0.122621	0.06178	1.9848	0.0471666	0.15681

## Sheet: S2 Atx2 KD NS
Gene	baseMean	log2FoldChange	lfcSE	stat	pvalue	padj
Socs36E	1213.93	-0.116626	0.0595349	-1.95895	0.0501188	0.163428
CG8230	2151.95	0.0990431	0.0514701	1.92429	0.0543187	0.173337
Ntf-2	1977.23	0.0987584	0.0513997	1.92138	0.0546838	0.174137
CG11448	2316.27	-0.0966978	0.0507602	-1.90499	0.0567808	0.178796
CG1146	2606.38	-0.0866237	0.0466371	-1.8574	0.0632544	0.192382
PRL-1	5600.86	-0.0793674	0.0447613	-1.77312	0.0762081	0.217975
CR44999	18.5047	0.682144	0.385849	1.7679	0.0770771	0.219377
CaMKII	2490.99	-0.113358	0.0643282	-1.76218	0.0780381	0.220501
rpr	94.0463	0.302184	0.17422	1.73449	0.0828303	0.230152
nuf	1724.16	-0.0917993	0.0531991	-1.72558	0.084423	0.233066
CG11593	823.087	0.11412	0.0694208	1.64389	0.1002	0.260382
CG12290	1486.57	0.0900913	0.0549724	1.63885	0.101245	0.261951
Rcd5	1018.89	0.100845	0.0618102	1.63153	0.102778	0.264822
Kap-alpha1	1468	-0.0906536	0.0556856	-1.62795	0.103535	0.265912
kek1	2952.83	0.0713852	0.0451293	1.58179	0.113697	0.283552
dco	3625.24	-0.0715186	0.045422	-1.57454	0.115364	0.286397
Pdk1	3040.04	-0.0820599	0.053872	-1.52324	0.127699	0.305084
Clamp	2979.82	-0.0705508	0.0472296	-1.49378	0.135232	0.317501
ttk	1937.97	-0.0794535	0.0536104	-1.48205	0.138326	0.322084
Spred	1663.65	-0.0830432	0.0561689	-1.47846	0.139286	0.323527
Rb97D	2754.14	0.0677083	0.047576	1.42316	0.15469	0.345297
Hmu	5346.53	-0.0564514	0.0410655	-1.37467	0.169235	0.366838
Mob2	709.106	0.102911	0.0748661	1.3746	0.169254	0.366838
CycG	11085.4	-0.050193	0.0381308	-1.31634	0.18806	0.392837
CG9821	8200.92	-0.0548491	0.0419824	-1.30648	0.191389	0.397663
fdl	2589.17	-0.0612888	0.0471064	-1.30107	0.193234	0.399668
bun	6725.7	-0.0652118	0.0504891	-1.2916	0.196496	0.403593
CG10232	2269.52	0.0651344	0.0516911	1.26007	0.207644	0.417465
sky	124.874	0.194456	0.156542	1.2422	0.214164	0.425176
gus	2323.2	-0.0656067	0.0539155	-1.21684	0.223664	0.438156
Gbeta13F	6532.45	-0.0455864	0.0384298	-1.18623	0.235533	0.451044
ref(2)P	4592.15	-0.0481792	0.0412893	-1.16687	0.243264	0.460239
Rac2	1430.73	-0.0646311	0.0554183	-1.16624	0.243517	0.460312
Tgi	2166.09	-0.0685079	0.0599555	-1.14265	0.253186	0.472258
CG13926	371.851	0.103697	0.0946434	1.09566	0.273227	0.496112
CG13384	3521.3	0.0567998	0.0522704	1.08665	0.27719	0.500336
Pp1alpha-96A	2471.99	-0.0510763	0.0470813	-1.08485	0.277987	0.501087
dos	3015.52	-0.0511447	0.0474608	-1.07762	0.281203	0.505092
sra	859.575	-0.0705549	0.0664053	-1.06249	0.288014	0.511257
mbf1	3116.71	-0.0459796	0.045886	-1.00204	0.316325	0.538212
CR45334	3762.48	0.0399166	0.0426978	0.934863	0.349859	0.573729
sax	1945.84	-0.044794	0.0513754	-0.871895	0.383266	0.604122
Pa1	554.012	0.0658271	0.0799454	0.823401	0.41028	0.626844
CG7956	1860.93	0.0428769	0.0529201	0.810218	0.417815	0.634219
CG32103	2151.42	-0.0396547	0.0490773	-0.808006	0.419087	0.63539
vsg	9131.83	0.0341007	0.044321	0.769404	0.441654	0.655246
CG42666	774.361	-0.051914	0.0696343	-0.745524	0.455955	0.66711
Arc2	899.289	-0.0470037	0.0683878	-0.687311	0.491887	0.696527
CG45050	3523.5	0.0291842	0.0428251	0.681473	0.495572	0.698673
sbr	1512.83	0.0392236	0.0576067	0.680886	0.495943	0.698673
CG17493	2731.18	-0.0345455	0.0507511	-0.680686	0.49607	0.698673
Mes2	6049.64	-0.0288172	0.0431827	-0.667332	0.50456	0.705939
DnaJ-1	2892.13	-0.0299689	0.0456215	-0.656905	0.511242	0.711003
CG5346	4991.03	-0.02766	0.0442642	-0.624885	0.532046	0.728335
CG42678	1438.15	-0.0344442	0.0566838	-0.607655	0.543416	0.736359
PEK	2475.05	-0.0280957	0.0477715	-0.588126	0.556448	0.746555
edl	2331.89	0.0283477	0.0484189	0.585467	0.558234	0.747388
CG18812	2258.06	-0.0309303	0.0529483	-0.584161	0.559112	0.747866
CG1882	2328.63	0.029567	0.0510122	0.579606	0.56218	0.750467
CG7694	6.30775	0.388162	0.67505	0.575012	0.565283
CG18766	1180.29	-0.0292468	0.058768	-0.497665	0.61872	0.788602
CG12025	1220.66	-0.0272886	0.0608931	-0.448139	0.654053	0.815252
CG2924	2906.3	0.0193299	0.0461294	0.419036	0.67519	0.826511
CG13124	3007.15	0.0179105	0.0456286	0.392528	0.694668	0.838354
SppL	1191.78	0.0144186	0.060521	0.238241	0.811694	0.906592
Nop17l	2121.68	-0.0049258	0.0511914	-0.0962232	0.923343	0.964381
Adar	985.304	-0.00450166	0.0690287	-0.0652143	0.948003	0.97436
Csk	2402.1	-0.0030396	0.0490404	-0.0619815	0.950578	0.975168
GstE8	363.545	-0.00460487	0.095132	-0.0484051	0.961393	0.98222
GstD3	544.556	0.00338468	0.0800588	0.0422774	0.966278	0.984437
CG12730	2007.95	-0.00160543	0.04968	-0.0323155	0.97422	0.988106
Pino	785.169	-0.00215938	0.071288	-0.030291	0.975835	0.98856

## Sheet: S2 Atx2-Adar OE Downregulated
Gene	baseMean	log2FoldChange	lfcSE	stat	pvalue	padj
RpL23	23857.5	-0.467721	0.0342068	-13.6733	1.46498e-42	6.94963e-40
betaTub60D	5061.12	-0.336392	0.0444863	-7.5617	3.97838e-14	9.25836e-13
Socs36E	1027.39	-0.619178	0.0857076	-7.22431	5.03646e-13	1.04228e-11
CG10232	1631.55	-0.485842	0.0690498	-7.03611	1.97681e-12	3.93259e-11
cindr	5950.74	-0.280444	0.042454	-6.60583	3.95287e-11	6.82839e-10
Manf	1149.4	-0.403828	0.0789066	-5.11779	3.09132e-07	3.1511e-06
drongo	1916.28	-0.291899	0.0653161	-4.46903	7.85769e-06	6.14175e-05
Vrp1	1779.06	-0.247351	0.0650315	-3.80356	0.00014263	0.00086151
Ntf-2	1367.1	-0.23092	0.0718332	-3.21466	0.00130597	0.00592637
Hmu	2888.57	-0.180677	0.0584808	-3.0895	0.00200492	0.00864033
CG5903	810.566	-0.277867	0.0920654	-3.01814	0.00254328	0.0106119
Hop	5641.37	-0.125095	0.0454258	-2.75384	0.00589014	0.0220683
CG6770	700.119	-0.265133	0.100856	-2.62882	0.0085682	0.0300228
CG3940	604.823	-0.250082	0.103259	-2.42189	0.0154401	0.0485069

## Sheet: S2 Atx2-Adar OE Upregulated
Gene	baseMean	log2FoldChange	lfcSE	stat	pvalue	padj
Adar	40529.3	7.55384	0.178431	42.3348	0	0
Atx2	75110.2	6.75109	0.0668952	100.921	0	0
hipk	9396.49	0.665644	0.0418409	15.9089	5.49529e-57	5.64825e-54
scyl	1273.89	1.17766	0.0769375	15.3067	6.90019e-53	6.07907e-50
aop	3379.61	0.735211	0.0514839	14.2804	2.8991e-46	1.98652e-43
CG45186	5733.47	0.622914	0.0456545	13.6441	2.18954e-42	9.00192e-40
zfh1	6914.2	0.558957	0.042537	13.1405	1.92938e-39	5.66596e-37
hdc	3419.77	0.67814	0.0544241	12.4603	1.22932e-35	2.44554e-33
kek1	2168.86	0.737312	0.0602983	12.2277	2.20991e-34	3.4945e-32
CG11505	2732.44	0.719591	0.0614034	11.7191	1.01778e-31	1.25533e-29
CG13624	2075.32	0.728713	0.0635143	11.4732	1.79829e-30	1.84834e-28
loco	3245.64	0.598044	0.0523223	11.43	2.96055e-30	2.85277e-28
trio	4465.55	0.500356	0.0465019	10.7599	5.32257e-27	3.90765e-25
sty	10362	0.3919	0.0374987	10.4511	1.44911e-25	9.50712e-24
crol	3054.12	0.548729	0.0525407	10.4439	1.56284e-25	1.01453e-23
RhoGAP18B	5706.35	0.454292	0.0436377	10.4105	2.2195e-25	1.3967e-23
w	3019.16	9.70284	0.953579	10.1752	2.55924e-24	1.4348e-22
Prosap	3435.97	0.543248	0.0539009	10.0786	6.86681e-24	3.61946e-22
Rip11	6007.86	0.436922	0.0442555	9.87271	5.46657e-23	2.78615e-21
CycG	6281.85	0.413661	0.042086	9.82894	8.45049e-23	4.23692e-21
ena	6023.15	0.435817	0.0447188	9.74572	1.92417e-22	9.11446e-21
fray	1325.38	0.726441	0.0747758	9.71493	2.60435e-22	1.20759e-20
CG30089	2272.28	0.573944	0.0598538	9.5891	8.88581e-22	4.05917e-20
CR42862	6663.06	0.429283	0.0450072	9.53811	1.45465e-21	6.45382e-20
Xrp1	8536.33	0.373251	0.0392215	9.51648	1.79145e-21	7.83537e-20
Traf4	623.848	0.985504	0.1048	9.40362	5.27151e-21	2.21152e-19
Pde11	1545.22	0.646132	0.069226	9.33367	1.02268e-20	4.12213e-19
ttk	992.8	0.755297	0.0837347	9.02012	1.87879e-19	6.89674e-18
CG3638	4490.55	0.454607	0.0520236	8.73849	2.36255e-18	8.00541e-17
step	2792.18	0.475687	0.0548549	8.67173	4.25616e-18	1.40362e-16
pes	1862.72	0.550549	0.0637823	8.6317	6.04463e-18	1.97234e-16
ush	4361.45	0.393349	0.0486902	8.07861	6.551e-16	1.87037e-14
emc	1405.1	0.567777	0.0719832	7.88764	3.0795e-15	8.11593e-14
CG10077	2255.2	0.483599	0.061728	7.83434	4.71306e-15	1.22124e-13
CG31224	1076.47	0.627085	0.0805931	7.78088	7.20246e-15	1.81296e-13
moody	1147.58	0.620258	0.079782	7.77441	7.58e-15	1.90024e-13
tmod	2593.53	0.474604	0.0614318	7.7257	1.11242e-14	2.7332e-13
PEK	1781.58	0.497788	0.0648601	7.6748	1.6568e-14	4.00686e-13
cwo	1227.41	0.591004	0.0773969	7.63601	2.24052e-14	5.35554e-13
psq	1946.04	0.453243	0.0650808	6.96431	3.30006e-12	6.44033e-11
CG7956	1214.62	0.525035	0.0766517	6.84962	7.40488e-12	1.39225e-10
Csk	1362.95	0.484017	0.0726706	6.66043	2.73033e-11	4.76996e-10
CG5004	2103.01	0.387781	0.0608423	6.37355	1.84698e-10	2.99746e-09
Taf4	1270.73	0.495467	0.0785715	6.30594	2.86455e-10	4.51808e-09
CG12290	689.316	0.61602	0.0977646	6.30105	2.95638e-10	4.65101e-09
CG13124	1659.65	0.413993	0.066542	6.22153	4.92327e-10	7.45991e-09
CG5522	1922.41	0.387336	0.0627128	6.17635	6.55993e-10	9.84309e-09
CG32138	5043.23	0.280639	0.0459273	6.11049	9.93234e-10	1.45149e-08
Unc-76	4808.31	0.265538	0.0448956	5.91457	3.32742e-09	4.53987e-08
gish	1863.68	0.375763	0.0641885	5.85405	4.79749e-09	6.3626e-08
dm	2347.13	0.339616	0.0582037	5.83496	5.38025e-09	7.05958e-08
E2f	1993.56	0.354572	0.0621168	5.70814	1.14216e-08	1.42297e-07
Pdk1	1903.8	0.379728	0.0668834	5.67747	1.36704e-08	1.68949e-07
pnt	5088.25	0.26273	0.0469505	5.59589	2.1949e-08	2.61312e-07
Tgi	896.478	0.49532	0.0889539	5.56827	2.57277e-08	3.03952e-07
C3G	1659.32	0.370473	0.0667124	5.55329	2.80341e-08	3.28681e-07
CG2909	932.276	0.456963	0.085572	5.34009	9.28986e-08	1.01759e-06
Arc2	605.4	0.563493	0.105763	5.32789	9.9359e-08	1.08451e-06
Nop17l	1605.95	0.353618	0.067231	5.25975	1.44252e-07	1.54983e-06
l(3)05822	1101.57	0.409537	0.079839	5.12954	2.90446e-07	2.98034e-06
dco	1630.87	0.34466	0.0672543	5.12473	2.97966e-07	3.05242e-06
Sir2	836.724	0.461679	0.0906721	5.09174	3.54796e-07	3.58693e-06
Hsromega	999.131	0.427766	0.0841872	5.08113	3.75205e-07	3.78086e-06
CG12567	1438.31	0.355031	0.0709425	5.0045	5.60076e-07	5.4308e-06
CG13384	2211.96	0.302277	0.0606275	4.9858	6.17051e-07	5.94586e-06
BtbVII	2137.09	0.312547	0.0627702	4.97923	6.38392e-07	6.14191e-06
bun	4244.33	0.226809	0.0468053	4.8458	1.26105e-06	1.1403e-05
CG9821	4712.62	0.225762	0.0471543	4.78774	1.68674e-06	1.48356e-05
tsh	1619.5	0.320877	0.0671835	4.77612	1.78709e-06	1.56548e-05
CG42666	589.922	0.492114	0.105395	4.66926	3.02293e-06	2.55726e-05
CG12730	961.71	0.390792	0.0845535	4.62184	3.80358e-06	3.16555e-05
PRL-1	2719.28	0.256582	0.0564039	4.54901	5.38982e-06	4.33364e-05
Pi3K92E	1449.22	0.326332	0.0717812	4.5462	5.46229e-06	4.38619e-05
Clamp	1751.82	0.301848	0.0666861	4.52641	5.99954e-06	4.77408e-05
Ubp64E	2307.38	0.263055	0.0584832	4.49796	6.86101e-06	5.40382e-05
CG11593	592.389	0.475305	0.108094	4.39713	1.09694e-05	8.35162e-05
ex	2846.94	0.238802	0.0567143	4.21061	2.54679e-05	0.000179088
Hsp26	1276.04	0.314604	0.0749722	4.19628	2.71336e-05	0.000189077
ref(2)P	3443.39	0.20884	0.0502278	4.15785	3.21255e-05	0.000220867
nuf	975.398	0.345498	0.0832956	4.14786	3.35598e-05	0.000229704
CG32103	1150.8	0.349109	0.085951	4.06172	4.87118e-05	0.000323713
CG33229	785.861	0.375344	0.0925982	4.05347	5.04641e-05	0.000334012
DnaJ-1	2481.05	0.230771	0.0583392	3.95567	7.63189e-05	0.000490269
SPoCk	2027.42	0.252239	0.0639435	3.94472	7.98947e-05	0.000511329
Pa1	396.674	0.50393	0.129859	3.88059	0.000104204	0.000653077
sbr	804.242	0.348529	0.0914759	3.81006	0.000138934	0.000842483
Mob2	532.348	0.418875	0.110407	3.79393	0.000148283	0.000892154
CG8878	1042.84	0.305761	0.0809572	3.77682	0.000158843	0.000947376
fdl	1417.88	0.274778	0.0733479	3.74624	0.000179507	0.00104534
gus	1135.19	0.292119	0.078154	3.73773	0.000185687	0.00107625
tth	716.536	0.350307	0.0959403	3.6513	0.000260916	0.00145749
CG31694	1176.61	0.28009	0.0769444	3.64015	0.000272475	0.00150663
CG2924	1496.27	0.251556	0.0697272	3.60772	0.0003089	0.00167459
Rac2	659.443	0.370387	0.103219	3.58835	0.000332777	0.0017894
RhoGAP71E	2209.42	0.212663	0.0593605	3.58257	0.000340226	0.00182461
CR45334	1515.99	0.242654	0.0692476	3.50415	0.000458061	0.00238184
CG2765	2443.21	0.184942	0.0569502	3.24743	0.00116451	0.00534405
sra	541.705	0.327004	0.111213	2.94035	0.00327841	0.0133628
CG2991	1043.77	0.236286	0.0817881	2.889	0.00386469	0.0153765
Rb97D	1404.83	0.193508	0.0715744	2.70359	0.00685945	0.0251373
nrv1	1768.7	0.17446	0.0651536	2.67767	0.00741357	0.0267225
CG11448	1222.52	0.199055	0.0759277	2.62164	0.00875072	0.0305301
dos	1754.56	0.164569	0.0658159	2.50045	0.0124035	0.0407526
CaMKII	1206.37	0.186446	0.0759542	2.45471	0.0140998	0.0451002
Rox8	2606.25	0.137203	0.0565443	2.42647	0.0152466	0.0480377
CG45050	2173.49	0.147439	0.0615698	2.39467	0.0166355	0.0515533
spin	1939.94	0.150318	0.0633157	2.3741	0.0175917	0.0539472
sax	945.318	0.184749	0.0860406	2.14723	0.0317751	0.086976
Mes2	2897.39	0.120017	0.0563335	2.13046	0.0331333	0.089975
SppL	531.413	0.232124	0.109504	2.11978	0.0340246	0.0918693
p120ctn	1631.4	0.144714	0.0691511	2.09272	0.036374	0.0968561
h	1088.5	0.166046	0.0794807	2.08914	0.0366952	0.0975008
Dp	1761.45	0.133644	0.0655982	2.03731	0.041619	0.107171
CG1882	1649.81	0.13606	0.0686814	1.98103	0.0475878	0.119688
Bacc	7471.44	0.0808658	0.0409986	1.9724	0.0485636	0.121527

## Sheet: S2 Atx2-Adar OE NS
Gene	baseMean	log2FoldChange	lfcSE	stat	pvalue	padj
Bsg	4750.14	0.0854294	0.0474688	1.7997	0.0719085	0.164959
rpr	196.325	0.298978	0.176737	1.69165	0.090712	0.197955
Ras64B	1117.14	-0.131632	0.0781123	-1.68516	0.0919581	0.199967
CG5346	2631.74	-0.0930823	0.0557038	-1.67102	0.0947174	0.20431
CG12025	671.507	0.143842	0.100582	1.4301	0.152688	0.292886
Pp1alpha-96A	1249.9	0.103707	0.0744921	1.39219	0.163865	0.307628
Hsp83	30216.2	-0.0432704	0.0315145	-1.37303	0.169742	0.314544
Rcd5	496.885	0.159201	0.117175	1.35867	0.174252	0.32069
bur	900.356	0.121572	0.089698	1.35534	0.175308	0.321796
Mlf	1961.81	-0.0868101	0.0650904	-1.33368	0.182307	0.330617
Sam-S	3782.6	-0.0635176	0.0487478	-1.30298	0.19258	0.344944
CG18766	561.898	0.138793	0.107103	1.29589	0.195015	0.34789
CG13926	295.618	-0.186826	0.145496	-1.28407	0.199119	0.353108
Adf1	543.941	0.139378	0.110139	1.26548	0.2057	0.36172
Gbeta13F	3497.2	-0.0624213	0.0504472	-1.23736	0.215954	0.374624
CG18812	1503.46	0.0777476	0.0695165	1.1184	0.263394	0.429155
Kap-alpha1	822.121	0.0981807	0.0895493	1.09639	0.27291	0.43909
CG8230	1154.27	-0.0858231	0.0783464	-1.09543	0.273328	0.439305
Capr	2069.17	0.0640797	0.0613485	1.04452	0.296244	0.46369
Rm62	6932.72	0.0413744	0.0413471	1.00066	0.316991	0.486234
Spred	888.568	0.0837165	0.0869347	0.962982	0.335556	0.505466
Pino	457.167	0.1089	0.117687	0.925331	0.354794	0.524075
CG1146	1295.1	-0.0645622	0.0769759	-0.838733	0.401619	0.569114
Galphaq	592.455	0.0830617	0.10475	0.792949	0.427807	0.593808
CanB2	2077.25	0.0473812	0.0612384	0.773718	0.439098	0.604752
shep	6281.46	0.0307216	0.0418241	0.734544	0.462617	0.624553
CG31324	1685.14	0.0421141	0.0666174	0.632179	0.52727	0.679982
CG31523	3126.84	-0.0319846	0.0530819	-0.602553	0.546806	0.696399
vsg	4285.55	-0.0252373	0.0471533	-0.535218	0.592499	0.727732
Rbp1-like	457.432	0.0615346	0.118969	0.517234	0.604993	0.737496
mbf1	2014.85	-0.0318936	0.0628743	-0.507259	0.611973	0.742336
Swip-1	3908.86	-0.0238081	0.0487726	-0.488146	0.625447	0.753787
CG42678	792.861	-0.0444366	0.0933095	-0.476228	0.633912	0.760423
CG11577	630.053	0.0485021	0.102506	0.473162	0.636097	0.761879
sky	70.1923	0.129171	0.295898	0.436539	0.662446
CG17493	1407.17	0.0299756	0.0706885	0.424052	0.671528	0.788371
CG7694	4.96415	0.464926	1.12968	0.411553	0.680667
GstE8	315.773	0.0571878	0.142608	0.401016	0.688409	0.800267
CR44999	5.45864	0.411106	1.05777	0.388654	0.697532
AdSS	2978.54	-0.0092963	0.0552285	-0.168324	0.866328	0.919948
Paip2	1033	-0.0129694	0.0815217	-0.159091	0.873597	0.923778
edl	2015.07	0.00895748	0.0651521	0.137486	0.890647	0.934253
GstD3	395.983	0.00209362	0.126373	0.0165671	0.986782	0.991929
