# Supplementary material for: Antagonistic roles for Ataxin-2 structured and disordered domains in RNP condensation
Source: eLife. 2021 Mar 10;10:e60326. doi: 10.7554/eLife.60326 (PMC7946432; doi:10.7554/eLife.60326)
Supplement: Figure 3—source data 1. — Fold changes in Atx2-target mRNAs upon Atx2 RNAi. [file elife-60326-fig3-data1.xlsx]

## Sheet: Brain_Transcriptome_DE
id	baseMean	log2FoldChange	lfcSE	stat	pvalue	padj
128up	282.382	0.472282	0.148422	3.18203	0.00146248	0.00592068
14-3-3epsilon	16167.9	-0.365609	0.108611	-3.36622	0.000762053	0.00336323
14-3-3zeta	42320	-0.700096	0.104764	-6.68257	2.34781e-11	5.37518e-10
140up	166.059	0.0853616	0.238709	0.357597	0.720645	0.816229
18w	742.192	-0.648412	0.140851	-4.60353	4.15381e-06	3.37612e-05
26-29-p	1658.93	0.965002	0.0961246	10.0391	1.02636e-23	1.1599e-21
2mit	5603.15	-0.863788	0.129284	-6.68133	2.36784e-11	5.40936e-10
312	199.757	0.0396987	0.182692	0.217299	0.827975	0.891956
4E-T	2250.91	-0.137283	0.14568	-0.94236	0.346008	0.490714
4EHP	9404.76	-0.896505	0.0922822	-9.71482	2.60713e-22	2.36714e-20
5-HT1A	1968.23	-0.597	0.12317	-4.84694	1.25378e-06	1.13837e-05
5-HT1B	880.698	-0.736128	0.123651	-5.95326	2.62849e-09	4.18627e-08
5-HT2A	572.493	-0.857062	0.14533	-5.89733	3.6942e-09	5.74575e-08
5-HT2B	905.658	-0.650796	0.153377	-4.24312	2.20438e-05	0.000149534
5-HT7	823.123	-0.667331	0.163494	-4.08168	4.47106e-05	0.000283389
5.8SrRNA:CR40454	9.81478	1.57213	0.728271	2.15872	0.0308721	0.0758451
5PtaseI	1032.1	-0.297467	0.0948734	-3.13541	0.00171611	0.00681505
7B2	7367.69	0.196837	0.139095	1.41512	0.157032	0.2755
A16	210.872	0.126993	0.308535	0.4116	0.680633	0.785327
A2bp1	10796	-0.61801	0.0920809	-6.7116	1.92502e-11	4.47473e-10
ABCB7	934.706	0.190261	0.144734	1.31455	0.188661	0.316161
ACC	5632.99	-0.183858	0.130133	-1.41285	0.1577	0.276215
ACXB	12.0858	-1.9779	0.68178	-2.90108	0.00371873	0.013252
ACXC	73.4797	-1.83646	0.367571	-4.99621	5.8469e-07	5.71404e-06
ACXD	13.8566	1.89979	0.664408	2.85937	0.00424488	0.0148047
AGBE	974.635	-0.041778	0.122134	-0.342068	0.732299	0.823801
AGO1	13934.8	-0.415067	0.133988	-3.09778	0.00194975	0.00764007
AGO2	3345.72	-0.35617	0.100514	-3.54349	0.00039487	0.00190929
AGO3	7.73775	1.65098	0.987521	1.67184	0.0945555	0.186012
AIF	653.065	0.0316676	0.137413	0.230455	0.817738	0.885528
ALiX	1748.17	-0.089143	0.139807	-0.637615	0.523725	0.65786
AMPKalpha	2249.84	-0.274867	0.14578	-1.8855	0.0593627	0.129038
AMPdeam	2621.23	-0.567926	0.106355	-5.33989	9.30025e-08	1.08807e-06
AP-1-2beta	3067.46	-0.454368	0.172599	-2.6325	0.00847582	0.026258
AP-1gamma	2354.29	-0.0242432	0.158413	-0.153038	0.878368	0.925502
AP-1mu	685.078	0.0645939	0.125749	0.513674	0.60748	0.728523
AP-1sigma	1165.63	-0.31298	0.117739	-2.65826	0.00785452	0.0247666
AP-2alpha	6086.78	-0.614402	0.111131	-5.5286	3.22789e-08	4.19705e-07
AP-2mu	1983.73	-0.920033	0.157478	-5.84229	5.14888e-09	7.77671e-08
AP-2sigma	1139.22	-0.62304	0.125946	-4.94687	7.54157e-07	7.16079e-06
APC10	100.141	0.391812	0.248413	1.57726	0.114736	0.216299
APC4	187.254	0.00863923	0.192871	0.0447929	0.964272	0.977896
APC7	19.8917	1.05311	0.5404	1.94875	0.0513248	0.114888
APP-BP1	468.974	0.00198336	0.201638	0.00983628	0.992152	0.994774
AQP	5.04005	-1.08599	1.05933	-1.02516	0.305285	0.447847
ASPP	879.936	-0.552314	0.132278	-4.17541	2.97445e-05	0.00019687
ATP7	610.385	0.0699701	0.117698	0.59449	0.552185	0.681954
ATPCL	6583.87	-0.534409	0.119887	-4.4576	8.28811e-06	6.27253e-05
ATPsyn-Cf6	2020.25	-0.125562	0.108432	-1.15799	0.24687	0.383722
ATPsyn-b	3796.65	-0.0460267	0.136634	-0.336862	0.736221	0.826294
ATPsyn-beta	18913.9	-0.26416	0.0852161	-3.09989	0.00193594	0.00759156
ATPsyn-d	2668.83	-0.249913	0.103012	-2.42605	0.0152642	0.0427389
ATPsyn-gamma	3415.76	-0.370323	0.140252	-2.6404	0.00828071	0.0257738
ATbp	160.821	-0.126205	0.200705	-0.628811	0.529473	0.661985
Aac11	5074.79	-0.31563	0.113666	-2.77683	0.00548925	0.0183368
Aatf	213.767	0.35488	0.189593	1.8718	0.0612337	0.132175
Aats-ala	449.586	0.717644	0.161	4.45743	8.2949e-06	6.27253e-05
Aats-ala-m	377.342	-0.0012751	0.153087	-0.00832922	0.993354	0.995604
Aats-arg	255.603	0.128672	0.169461	0.759302	0.447672	0.589662
Aats-asn	658.29	0.343719	0.178668	1.92378	0.0543816	0.120303
Aats-asp	418.94	0.674403	0.140155	4.81183	1.49555e-06	1.33844e-05
Aats-cys	260.591	0.432238	0.156048	2.7699	0.00560737	0.0186731
Aats-gln	340.048	0.780825	0.170183	4.58815	4.47197e-06	3.6126e-05
Aats-glupro	966.591	0.188885	0.13718	1.37691	0.16854	0.29046
Aats-gly	507.65	0.208445	0.12526	1.6641	0.0960932	0.188235
Aats-his	554.917	0.131859	0.210204	0.627292	0.530468	0.663116
Aats-ile	834.006	-0.0580039	0.127823	-0.453784	0.649984	0.763043
Aats-leu	418.666	0.082261	0.138584	0.593583	0.552791	0.682191
Aats-lys	716.892	0.303625	0.149349	2.03299	0.0420535	0.0979037
Aats-met	174.088	0.401901	0.202141	1.98823	0.0467868	0.106543
Aats-phe	571.81	0.206345	0.145053	1.42255	0.154868	0.272704
Aats-pro	119.05	0.437046	0.224222	1.94917	0.0512751	0.114818
Aats-ser	259.308	0.276722	0.145741	1.89873	0.0576001	0.126136
Aats-thr	1350.74	-0.00375792	0.1336	-0.0281281	0.97756	0.986261
Aats-trp	290.638	0.603874	0.160099	3.77189	0.000162016	0.000874096
Aats-tyr	582.131	-0.263127	0.149389	-1.76136	0.0781778	0.160294
Aats-tyr-m	142.213	0.143754	0.206287	0.696865	0.485887	0.625722
Aats-val	720.089	0.236297	0.165633	1.42664	0.153685	0.271105
Abi	818.988	-0.207495	0.107475	-1.93063	0.0535292	0.118813
Abl	4054.6	-0.599591	0.179842	-3.334	0.000856076	0.00372709
Abp1	636.361	-0.264632	0.114357	-2.31407	0.0206636	0.054686
Ac13E	968.655	-0.549231	0.145568	-3.77302	0.000161282	0.000870576
Ac3	5528.03	-0.670324	0.139178	-4.81631	1.46235e-06	1.31426e-05
Ac76E	2179.21	-0.516417	0.099958	-5.16635	2.38715e-07	2.54605e-06
Ac78C	662.634	-0.426081	0.189767	-2.24528	0.0247502	0.0632935
AcCoAS	10558.3	-0.437733	0.110552	-3.95953	7.50964e-05	0.000448733
Ace	16364.1	-0.719785	0.157676	-4.56495	4.99608e-06	3.99348e-05
Acer	626.48	1.37794	0.186649	7.38251	1.55328e-13	4.62199e-12
Acf1	988.878	-0.997459	0.274693	-3.63118	0.000282129	0.00142853
Ack	1348.5	-0.364197	0.136111	-2.67574	0.00745647	0.0237369
Ack-like	1929	-0.551417	0.140232	-3.93219	8.41766e-05	0.000494858
Acn	3142.25	-0.093808	0.225246	-0.416468	0.677067	0.78277
Acon	9273.03	-0.34554	0.0909005	-3.80131	0.000143936	0.000789787
Acox57D-d	107.61	1.85067	0.350687	5.27725	1.31133e-07	1.49788e-06
Acox57D-p	108.588	1.66687	0.230998	7.21596	5.35567e-13	1.49326e-11
Acp1	32.045	-6.79353	1.36835	-4.96476	6.87869e-07	6.63088e-06
Acp36DE	2.62641	0.684944	1.36069	0.503381	0.614697	0.734723
Acp53C14c	3.25669	-1.12319	1.26309	-0.889237	0.373876	0.518835
Acp53Ea	2.15426	-1.98665	1.4492	-1.37085	0.17042
Acph-1	242.661	0.204664	0.153372	1.33443	0.182063	0.308068
Acsl	5652.44	-0.31489	0.103344	-3.04702	0.0023112	0.0088221
Act42A	867.601	-0.469772	0.180606	-2.60109	0.00929294	0.0283675
Act57B	744.089	-2.67575	0.270447	-9.89381	4.42836e-23	4.612e-21
Act5C	17001.1	-0.155145	0.0966756	-1.6048	0.108539	0.207301
Act79B	181.098	1.25738	0.251564	4.99823	5.78588e-07	5.66483e-06
Act87E	89.3176	-2.11924	0.474339	-4.46778	7.90351e-06	6.03095e-05
Act88F	30.8989	-2.75221	0.689411	-3.99212	6.54849e-05	0.000397512
Actbeta	2341.65	-0.463586	0.118975	-3.89649	9.75985e-05	0.000561033
Actn	998.127	-0.109409	0.152737	-0.716327	0.473789	0.614088
Acyp2	206.937	0.0865353	0.174456	0.496028	0.619875	0.738635
AdSL	247.183	1.13683	0.27862	4.08021	4.49943e-05	0.000284848
AdSS	1514.01	-0.159611	0.162263	-0.983656	0.325285	0.469115
Ada	11.4186	0.542092	0.634699	0.854093	0.393053	0.537857
Ada1-1	12.6655	0.317032	0.604729	0.524254	0.600102	0.722694
Ada1-2	16.7327	0.115761	0.569062	0.203424	0.838804	0.898882
Ada2a	265.147	0.0723868	0.198731	0.364246	0.715674	0.812414
Ada2b	301.085	0.465526	0.171646	2.71214	0.00668511	0.021638
Adam	947.231	0.394592	0.169311	2.33058	0.0197755	0.0526132
AdamTS-A	130.756	-0.717384	0.393697	-1.82218	0.0684283	0.144057
Adar	7405.48	-0.79399	0.161545	-4.91498	8.8793e-07	8.30324e-06
AdenoK	611.426	1.07356	0.129918	8.26339	1.41594e-16	6.18994e-15
Adf1	794.875	-0.0427198	0.131816	-0.324087	0.745872	0.833546
Adgf-A	39.292	2.34533	0.535174	4.38238	1.17391e-05	8.52972e-05
Adgf-C	230.718	-0.983283	0.173272	-5.67478	1.38868e-08	1.93088e-07
Adgf-D	2199.67	-1.18124	0.142567	-8.28552	1.17595e-16	5.18962e-15
Adh	17.5677	0.57579	0.519499	1.10836	0.267708	0.407256
AdipoR	3411.03	0.400267	0.110803	3.61242	0.000303356	0.00152222
Adk1	1123.19	0.0225395	0.157046	0.143521	0.885879	0.930186
Adk2	982.476	0.185562	0.123992	1.49656	0.134508	0.24392
Adk3	250.462	0.0457577	0.219656	0.208315	0.834983	0.896233
AdoR	275.607	-0.164855	0.153213	-1.07599	0.281932	0.42376
Ady43A	661.932	1.29637	0.12973	9.99284	1.63819e-23	1.79408e-21
Aef1	1410.85	-0.437959	0.148315	-2.95289	0.00314812	0.0114962
Afti	1705.52	-0.462138	0.140148	-3.29751	0.000975463	0.00417331
Ag5r	156.043	-0.957501	1.37028	-0.698764	0.484699	0.624495
Ag5r2	3.03518	0.710844	1.19176	0.596465	0.550865	0.680842
Ahcy13	299.853	1.60213	0.247152	6.48237	9.02923e-11	1.88073e-09
Ahcy89E	76.8669	-0.85777	0.462464	-1.85478	0.0636273	0.136163
Ak6	76.843	0.538147	0.267845	2.00917	0.0445191	0.102387
Akap200	2463.36	0.152893	0.200806	0.761398	0.44642	0.588888
Akh	837.282	1.35043	0.566672	2.38308	0.0171682	0.0469442
AkhR	115.795	2.66241	0.396867	6.70858	1.96528e-11	4.55833e-10
Akt1	1082.39	-0.311702	0.141912	-2.19644	0.0280602	0.0701539
Alas	1177.8	0.159293	0.110257	1.44475	0.148529	0.264247
Ald	17389.6	-0.189314	0.112554	-1.68198	0.0925732	0.182721
Aldh	4161.17	0.983123	0.138391	7.10396	1.21231e-12	3.2521e-11
Aldh-III	1302.53	-0.134397	0.103964	-1.29273	0.196105	0.325555
Alg-2	617.982	0.226612	0.145166	1.56106	0.11851	0.222033
Alg10	118.994	0.20718	0.213054	0.972429	0.330837	0.474994
Alh	2164.66	-0.579136	0.198961	-2.9108	0.00360505	0.0129162
Alk	10667.4	-0.614468	0.150676	-4.07809	4.5408e-05	0.000287124
AlkB	60.1773	0.944199	0.340152	2.77581	0.00550637	0.0183828
Alr	163.643	0.132604	0.205849	0.64418	0.519459	0.654673
Ama	88.0812	-3.00077	0.488014	-6.14895	7.79982e-10	1.36503e-08
Amnionless	57.148	0.529741	0.327607	1.617	0.105878	0.202949
Amph	6229.78	-0.775036	0.156966	-4.93762	7.90832e-07	7.46093e-06
Amun	2236.43	0.340946	0.123941	2.75088	0.00594357	0.0196143
Amy-d	149.466	5.44897	0.552602	9.86056	6.17061e-23	6.36412e-21
Amy-p	65.2884	4.13181	0.625874	6.60167	4.06555e-11	9.01635e-10
Ance	304.524	-0.192261	0.210166	-0.914804	0.360295	0.505269
Ance-3	25.0836	-0.021663	0.582627	-0.0371816	0.97034	0.981801
Ance-4	162.146	3.18544	0.359835	8.8525	8.55795e-19	4.96782e-17
Ance-5	295.197	3.12061	0.217294	14.3612	9.05958e-47	6.87428e-44
Ank	10763.4	-0.195351	0.146503	-1.33342	0.182393	0.308431
Ank2	20805.2	-0.537599	0.21691	-2.47844	0.0131957	0.0379475
Ant2	28.6253	-0.544479	0.50472	-1.07878	0.280688	0.422463
Antp	30.6163	-0.262155	0.42695	-0.614018	0.539203	0.670642
AnxB10	1368.41	-0.105653	0.291251	-0.362756	0.716788	0.813334
AnxB11	562.807	0.248493	0.152269	1.63194	0.102692	0.198022
AnxB9	1730.3	0.43677	0.150864	2.89513	0.00379002	0.0134654
Aos1	240.503	0.434029	0.188551	2.30192	0.0213398	0.0560151
Apc	5541.62	-0.340295	0.168701	-2.01715	0.0436796	0.100934
Apc2	7.69708	0.678386	0.765257	0.886482	0.375358	0.520416
ApepP	219.837	0.452726	0.180805	2.50394	0.0122818	0.0356766
Apf	85.8343	0.0403501	0.232004	0.17392	0.861928	0.913981
Aph-4	1002.8	0.867854	0.136079	6.37756	1.79928e-10	3.51356e-09
Aplip1	4169.48	-0.139219	0.0787103	-1.76876	0.0769347	0.158418
Apoltp	2374.72	0.722017	0.288892	2.49926	0.0124452	0.0360526
Appl	36760.6	-0.577996	0.135586	-4.26293	2.0176e-05	0.000138099
Aprt	128.517	0.635337	0.239156	2.65658	0.00789369	0.0248606
Aps	3053.44	0.297785	0.0885914	3.36133	0.000775693	0.0034135
Arc1	442.041	0.646369	0.18288	3.53439	0.000408716	0.00196639
Arc2	55.2459	0.835475	0.298107	2.8026	0.00506929	0.017144
Arc42	273.947	1.05379	0.171601	6.14095	8.20279e-10	1.4215e-08
Arf102F	928.076	0.0517157	0.146559	0.352865	0.724189	0.818759
Arf51F	1758.43	-0.0681544	0.0889139	-0.766522	0.443366	0.586535
Arf79F	4031.62	-0.00148711	0.0982501	-0.0151359	0.987924	0.992419
ArfGAP1	617.843	0.324303	0.149928	2.16306	0.0305365	0.0752119
ArfGAP3	667.787	0.188918	0.137326	1.37569	0.168918	0.290828
Arfip	644.455	0.0568867	0.111093	0.512062	0.608608	0.729794
Arfrp1	142.054	-0.0802894	0.198058	-0.405384	0.685195	0.789239
Argk	22127.2	-0.499625	0.12606	-3.96338	7.38965e-05	0.000443254
Ark	1276.86	-0.342668	0.138992	-2.46538	0.0136867	0.039095
Arl1	236.866	0.265185	0.222076	1.19412	0.232432	0.367748
Arl2	175.371	0.0839957	0.191938	0.437619	0.661662	0.771317
Arl4	1698.22	-0.0634201	0.118612	-0.534683	0.592869	0.716338
Arl6	6.74281	-0.511321	1.12748	-0.453509	0.650182	0.763192
Arp1	1152.5	-0.365744	0.172264	-2.12315	0.033741	0.0817588
Arp10	285.273	0.267581	0.210918	1.26865	0.204566	0.335248
Arp2	1527.9	0.0749587	0.101211	0.740618	0.458925	0.600428
Arp3	583.617	0.348592	0.136843	2.54739	0.0108532	0.0323405
Arp5	268.379	0.30142	0.211115	1.42775	0.153363	0.270627
Arp6	207.902	0.558733	0.196809	2.83896	0.00452613	0.0155855
Arp8	106.708	0.80401	0.257229	3.12566	0.00177405	0.00701368
Arpc1	1087.42	0.51385	0.147008	3.49538	0.000473383	0.00223599
Arpc2	567.572	0.0989825	0.112459	0.880164	0.378771	0.523848
Arpc3A	329.299	-0.294216	0.182477	-1.61234	0.106888	0.204663
Arpc3B	10.0907	0.884291	0.847085	1.04392	0.296522	0.439078
Arpc4	297.795	0.470121	0.198796	2.36483	0.0180381	0.0488362
Arpc5	220.365	0.416164	0.228258	1.82322	0.0682699	0.143838
Arr1	1462.24	1.78829	0.252768	7.07483	1.49631e-12	3.95407e-11
Arr2	3402.75	1.80894	0.241461	7.49163	6.80244e-14	2.13794e-12
Ars2	1681.91	0.659342	0.158424	4.16188	3.15644e-05	0.000207108
Art1	303.354	-0.198159	0.146578	-1.3519	0.176409	0.300753
Art2	8.35752	1.01911	0.798813	1.27578	0.202033	0.332149
Art3	153.765	0.617131	0.222737	2.77067	0.00559404	0.0186404
Art4	409.12	-0.558995	0.124717	-4.48212	7.39057e-06	5.67679e-05
Art7	135.919	0.764872	0.250758	3.05024	0.00228658	0.00875329
Art8	52.9833	0.492853	0.325819	1.51266	0.130367	0.23828
Asap	2414.36	-0.430195	0.134538	-3.19758	0.00138586	0.00565143
Asator	11572.6	-0.516596	0.141564	-3.64921	0.000263052	0.00134281
Asciz	132.936	-0.150459	0.211809	-0.710352	0.477486	0.617823
Asph	230.819	-0.422432	0.258712	-1.63283	0.102505	0.197733
AstA	1227.01	0.0405076	0.156204	0.259325	0.795384	0.870799
AstA-R1	586.106	-0.780074	0.160822	-4.85055	1.23122e-06	1.11884e-05
AstA-R2	16.5643	-0.609348	0.607511	-1.00303	0.315849	0.458785
AstC	2763.19	0.42803	0.168239	2.54417	0.0109538	0.0325761
AstC-R1	1398.75	-0.960601	0.149596	-6.42131	1.35104e-10	2.67763e-09
AstC-R2	545.046	-1.18821	0.120636	-9.84957	6.88382e-23	6.96446e-21
AstCC	28.3634	-1.33056	0.634934	-2.09558	0.0361193	0.0861809
Asx	1678.82	-0.516323	0.17019	-3.03381	0.00241484	0.00915191
Atac1	79.8085	0.551888	0.25604	2.15548	0.0311246	0.0763596
Atac2	170.787	0.296957	0.175172	1.69523	0.0900323	0.178936
Atac3	261.194	0.135249	0.160436	0.843008	0.399224	0.543155
Ate1	635.113	0.0388541	0.141299	0.274978	0.783333	0.861691
Atet	2136.56	-0.508777	0.0966614	-5.2635	1.41342e-07	1.60072e-06
Atf-2	154.479	0.0318091	0.18276	0.174048	0.861827	0.913965
Atf3	780.039	-0.232502	0.168856	-1.37693	0.168535	0.29046
Atf6	2144.54	0.0328909	0.151499	0.217104	0.828127	0.89203
Atg1	2941.89	-0.376278	0.0997022	-3.77402	0.000160639	0.00086793
Atg10	39.0617	-0.364679	0.353744	-1.03091	0.302582	0.445137
Atg101	1236.48	-0.992352	0.111028	-8.93781	3.96942e-19	2.40955e-17
Atg12	214.081	0.37411	0.197703	1.89229	0.0584528	0.127478
Atg13	481.252	-0.205775	0.137767	-1.49364	0.13527	0.245008
Atg14	396.628	-0.0361272	0.168031	-0.215003	0.829765	0.893409
Atg16	203.758	0.408632	0.16958	2.40967	0.0159671	0.0443794
Atg17	2024.45	-0.445404	0.137963	-3.22843	0.00124471	0.005155
Atg18a	1067.9	-0.485152	0.108686	-4.46379	8.0521e-06	6.12732e-05
Atg18b	1078.65	-0.618061	0.112092	-5.51389	3.50986e-08	4.52491e-07
Atg2	1265.8	-0.593356	0.142672	-4.15889	3.19802e-05	0.000209448
Atg3	626.724	0.520707	0.212457	2.45089	0.0142505	0.0403688
Atg4a	432.609	0.326874	0.144515	2.26186	0.023706	0.0611384
Atg4b	520.665	-0.0935726	0.125652	-0.744698	0.456454	0.598626
Atg5	302.394	-0.344199	0.172132	-1.99962	0.0455409	0.104173
Atg6	346.837	-0.347111	0.163261	-2.12612	0.0334936	0.0812705
Atg7	255.025	-0.0138389	0.155339	-0.089088	0.929012	0.957216
Atg8a	6333.92	-0.614619	0.136179	-4.51332	6.38219e-06	4.97053e-05
Atg9	413.912	-0.680815	0.185695	-3.6663	0.000246087	0.00126718
Atox1	1632.77	-0.243599	0.151868	-1.60402	0.108709	0.207476
Atpalpha	123845	-1.18988	0.140262	-8.48327	2.1896e-17	1.09718e-15
AttA	13.4061	-0.442126	0.693247	-0.637761	0.523629	0.65786
AttB	15.1904	0.755502	1.04035	0.726201	0.467715	0.608442
AttC	120.959	0.620237	0.453197	1.36858	0.17113	0.293971
AttD	3.40585	-0.174778	1.41463	-0.123551	0.901671	0.939248
Atu	260.326	0.738561	0.247679	2.98193	0.00286433	0.0105792
Atx-1	3.3348	1.23118	1.37116	0.897909	0.369234	0.514207
Atx2	3632.18	-0.386355	0.137272	-2.81453	0.00488491	0.0166056
Atxn7	523.021	-0.0436804	0.143728	-0.303909	0.761197	0.844461
Aven	103.765	-0.468095	0.234209	-1.99862	0.0456495	0.104354
Awh	145.568	-0.290247	0.234544	-1.23749	0.215903	0.348404
Axn	1435.66	-0.0815953	0.142723	-0.571704	0.567523	0.694318
Axs	115.795	0.401512	0.266944	1.5041	0.132555	0.241366
Axud1	836.369	-0.200453	0.146044	-1.37256	0.169891	0.292205
B-H1	29.5924	-0.389431	0.395436	-0.984815	0.324715	0.46842
B-H2	22.0299	-0.840501	0.535032	-1.57094	0.116197	0.218626
B4	4372.9	-0.676692	0.149047	-4.54013	5.62186e-06	4.43692e-05
B52	5529.67	-0.176639	0.132052	-1.33765	0.18101	0.306678
BBS1	2.61661	0.597215	1.49141	0.400436	0.688835	0.791594
BBS4	5.43042	1.13838	0.983106	1.15795	0.246886	0.383722
BCAS2	96.9263	0.574663	0.251464	2.28527	0.0222973	0.0580976
BCL7-like	177.153	0.0153859	0.181943	0.0845645	0.932608	0.959073
BEAF-32	420.887	0.310015	0.171954	1.80289	0.0714048	0.149141
BHD	134.206	-0.0904801	0.23431	-0.386155	0.699382	0.79939
BI-1	1871.73	-0.331287	0.132678	-2.49693	0.0125274	0.0362514
BM-40-SPARC	2868.18	-0.151696	0.163912	-0.925474	0.354719	0.500024
BRWD3	1343.27	-0.611208	0.173878	-3.51515	0.000439506	0.00209366
BTBD9	388.017	0.0717925	0.132923	0.540105	0.589125	0.713356
Bacc	15501.8	0.00661217	0.101294	0.0652768	0.947954	0.968774
Bace	3.97929	-1.82775	1.12408	-1.626	0.103951	0.200012
Baldspot	3329.61	-0.0629598	0.133965	-0.469971	0.638376	0.753577
Bap170	569.434	-0.0159192	0.177159	-0.0898584	0.9284	0.956956
Bap55	322.821	0.217993	0.14736	1.47932	0.139054	0.250707
Bap60	557.704	0.508303	0.179517	2.8315	0.00463309	0.0158634
Bdbt	190.091	0.335794	0.20685	1.62337	0.104511	0.200872
Bem46	238.054	-0.527898	0.162929	-3.24004	0.00119512	0.00497288
Best1	570.516	-0.148568	0.141803	-1.04771	0.294774	0.437443
Best2	38.4657	0.0400427	0.375584	0.106614	0.915095	0.947788
Bet1	161.773	0.387505	0.209487	1.84978	0.0643454	0.137395
Bet3	473.822	-0.0319386	0.131205	-0.243425	0.807676	0.879029
Bet5	219.488	-0.16111	0.237229	-0.679135	0.497052	0.63609
Bgb	772.425	-0.533025	0.198434	-2.68616	0.00722786	0.0231479
BicD	3383.35	-0.608679	0.123651	-4.92254	8.54298e-07	7.99577e-06
Bili	1812.43	-0.691949	0.129064	-5.36127	8.26381e-08	9.81951e-07
Bin1	136.863	0.597621	0.282755	2.11356	0.0345526	0.0832507
Bka	94.6178	0.0911138	0.266404	0.342013	0.732341	0.823801
Blimp-1	2572.73	-0.471941	0.153924	-3.06607	0.00216894	0.00836322
Blm	171.304	-0.152542	0.189275	-0.805929	0.420284	0.564227
Blos1	195.57	-0.0279017	0.183905	-0.151718	0.879409	0.926091
Blos2	112.148	-0.12798	0.23224	-0.551067	0.581588	0.706727
Blos3	92.3824	-0.233558	0.325465	-0.717611	0.472997	0.61336
Blos4	105.497	-0.30418	0.236775	-1.28468	0.198904	0.328916
Bmcp	323.429	0.634318	0.160794	3.94491	7.983e-05	0.000473233
BoYb	2.54186	-1.80987	1.62291	-1.1152	0.264764	0.403702
Br140	502.561	0.130667	0.145963	0.895205	0.370677	0.515812
Brca2	282.099	-0.0265556	0.184422	-0.143993	0.885506	0.929907
Brd8	225.616	0.259172	0.193534	1.33915	0.180521	0.306044
Bre1	1029.6	0.0347851	0.153784	0.226194	0.82105	0.887551
Brf	492.723	0.151491	0.134858	1.12334	0.261294	0.399815
Brms1	303.658	0.154079	0.190318	0.809588	0.418177	0.561889
Bruce	6520.92	-0.604374	0.25484	-2.37158	0.0177123	0.0480976
Bsg	13738.2	-0.466509	0.115802	-4.0285	5.61349e-05	0.000345493
Bsg25D	1081.83	-0.146102	0.122092	-1.19665	0.231444	0.366631
BtbVII	2533.42	-0.18794	0.118595	-1.58473	0.113028	0.213837
Btd	2.28151	-0.315801	1.66342	-0.18985	0.849427
Btk29A	738.14	-0.0392302	0.139966	-0.280284	0.779259	0.858855
Bub1	487.086	-0.164828	0.15144	-1.08841	0.276415	0.417333
Bub3	274.935	0.0767557	0.168363	0.455895	0.648465	0.761513
BubR1	126.489	-0.330421	0.235335	-1.40405	0.160305	0.279763
Buffy	40.1447	-0.233455	0.367048	-0.636034	0.524754	0.658549
Burs	2.87523	-3.21237	2.05822	-1.56075	0.118583	0.222113
Bx	1856.8	-0.443742	0.0997162	-4.45005	8.58519e-06	6.45896e-05
Bx42	554.925	-0.0455753	0.222881	-0.204482	0.837977	0.898358
Bzd	283.985	0.378806	0.15048	2.51732	0.0118251	0.0346534
C15	32.5183	-0.230183	0.428962	-0.536604	0.591541	0.715222
C1GalTA	1135.13	-0.273983	0.1009	-2.71539	0.00661968	0.0214589
C3G	3183.42	-0.291569	0.126381	-2.30706	0.0210517	0.0555059
C901	11.5865	-0.0119834	0.604176	-0.0198343	0.984176	0.99061
CAH1	3027.74	0.354088	0.192035	1.84387	0.0652018	0.138694
CAH2	130.998	0.844716	0.236071	3.57823	0.000345924	0.0017076
CAHbeta	100.255	-0.0475633	0.276131	-0.172249	0.863242	0.914511
CAP	1794.75	0.540682	0.110519	4.89221	9.97123e-07	9.21883e-06
CASK	11296.9	-0.487377	0.18484	-2.63676	0.0083703	0.0259979
CBP	88.394	-2.05321	0.453657	-4.52592	6.01345e-06	4.70751e-05
CCAP	98.9771	0.51598	0.309152	1.66902	0.0951137	0.186833
CCAP-R	82.8599	-0.752446	0.248277	-3.03068	0.00244006	0.00923432
CCHa1	109.87	-0.000693046	0.253888	-0.00272973	0.997822	0.998613
CCHa1-R	195.685	-0.104286	0.214412	-0.486383	0.626696	0.743593
CCHa2	424.253	1.53286	0.162722	9.42016	4.50398e-21	3.51807e-19
CCHa2-R	142.01	-0.622316	0.221096	-2.81469	0.00488245	0.0166056
CCKLR-17D1	256.853	-0.285657	0.165669	-1.72427	0.0846595	0.170588
CCKLR-17D3	263.02	-0.684997	0.154918	-4.42167	9.79424e-06	7.25102e-05
CD98hc	3962.86	-0.122278	0.12688	-0.963726	0.335184	0.479227
CDC45L	162.224	0.323659	0.185945	1.74062	0.0817508	0.165954
CDase	2782.24	0.760401	0.116598	6.52156	6.95805e-11	1.47831e-09
CG10011	3947.3	-0.47094	0.177367	-2.65517	0.00792686	0.0249274
CG10019	676.367	-1.30606	0.139936	-9.33331	1.02615e-20	7.56999e-19
CG10026	73.5383	1.18348	0.388633	3.04523	0.00232504	0.008859
CG10031	121.371	0.886022	0.272435	3.25223	0.00114503	0.00478318
CG10038	164.552	0.543708	0.276859	1.96385	0.0495479	0.111704
CG10041	2.78581	0.135874	1.29009	0.105321	0.916121	0.948441
CG10050	75.1301	0.474835	0.297955	1.59365	0.111015	0.210931
CG10053	59.7006	0.176649	0.32055	0.551081	0.581578	0.706727
CG10055	370.806	-0.0917446	0.147591	-0.621613	0.534196	0.665974
CG10062	41.7164	-2.67227	0.684002	-3.90681	9.35217e-05	0.000541407
CG10064	3.58208	1.98986	1.25697	1.58306	0.113407	0.21437
CG10068	284.326	-0.150971	0.153358	-0.984437	0.324901	0.468625
CG10073	3.00236	4.84268	2.354	2.05721	0.0396657	0.093038
CG10075	240.86	0.312911	0.169175	1.84963	0.0643666	0.137413
CG10077	32319.3	-0.607284	0.167086	-3.63456	0.000278452	0.00141193
CG10082	6480.29	-0.120719	0.118574	-1.01809	0.308635	0.451477
CG10089	1604.1	-0.816782	0.0854278	-9.56107	1.16545e-21	1.00893e-19
CG10092	215.315	-0.198311	0.175231	-1.13171	0.257755	0.395569
CG10098	1121.7	0.0567641	0.147179	0.385681	0.699733	0.799705
CG10103	694.548	0.161717	0.145452	1.11183	0.266212	0.405502
CG10116	1.99725	1.32312	1.73797	0.761305	0.446475
CG10126	277.556	0.884176	0.270952	3.26321	0.00110156	0.00463074
CG10131	137.467	2.57009	0.316013	8.13286	4.19287e-16	1.76051e-14
CG10132	2884.58	-0.406871	0.176585	-2.30411	0.0212164	0.0558153
CG10133	93.3069	0.326732	0.346828	0.942057	0.346163	0.490829
CG10137	1341.84	-0.0757709	0.115825	-0.654184	0.512993	0.649441
CG10139	328.749	0.82137	0.185024	4.43925	9.0271e-06	6.77224e-05
CG10144	342.365	-0.0760044	0.150671	-0.504441	0.613952	0.734295
CG10147	205.826	-0.0224219	0.163101	-0.137472	0.890657	0.933174
CG10151	444.052	-0.112391	0.157977	-0.711435	0.476815	0.617256
CG10157	352.946	-0.483974	0.169354	-2.85777	0.00426627	0.0148592
CG10158	302.942	0.368008	0.145118	2.53591	0.0112155	0.0331411
CG10164	1.54678	2.69212	2.41795	1.11339	0.265541
CG10165	48.8483	1.26183	0.33181	3.80287	0.000143028	0.000786023
CG10166	185.899	0.616933	0.17061	3.61605	0.000299129	0.00150457
CG10171	214.517	0.135169	0.174473	0.774727	0.438501	0.582347
CG10175	18.3786	-0.210703	0.666813	-0.315985	0.752014	0.837772
CG10176	23.7646	-0.423372	0.564983	-0.749352	0.453645	0.595903
CG10177	21.0359	-0.634166	0.497096	-1.27574	0.202047	0.332149
CG10178	251.712	1.50125	0.20317	7.3891	1.47826e-13	4.43602e-12
CG10184	279.995	1.38471	0.302392	4.5792	4.66749e-06	3.75343e-05
CG10185	10.8462	-0.049499	0.683133	-0.0724588	0.942237	0.965299
CG10186	27918.5	-0.340116	0.174038	-1.95426	0.0506705	0.113799
CG10188	2154.05	-0.862531	0.125579	-6.86841	6.49216e-12	1.59644e-10
CG10189	123.088	0.246349	0.226988	1.08529	0.277792	0.418995
CG10194	113.401	0.151837	0.221745	0.684739	0.493509	0.632546
CG10195	68.5555	0.515672	0.318072	1.62124	0.104965	0.201526
CG10202	2.15359	1.49688	1.53575	0.974684	0.329717
CG10205	8.40048	-0.510352	0.831632	-0.613675	0.53943	0.670767
CG10208	156.174	0.210181	0.247878	0.847919	0.396483	0.540661
CG10209	282.952	0.0263451	0.146599	0.179708	0.857382	0.91107
CG10211	12.7219	-2.0611	0.714715	-2.88381	0.00392891	0.0138753
CG10214	212.52	0.423494	0.200685	2.11024	0.0348375	0.0836903
CG10217	277.656	-0.169023	0.144991	-1.16575	0.243716	0.379952
CG10219	1415.22	-0.215691	0.111938	-1.92687	0.0539953	0.119632
CG10222	62.1367	0.583896	0.300708	1.94174	0.0521688	0.116377
CG10226	4000.3	-1.56508	0.166642	-9.39185	5.89529e-21	4.50544e-19
CG10232	6.2419	0.304789	0.881498	0.345762	0.729521	0.821901
CG10237	131.28	0.681134	0.419565	1.62343	0.104497	0.200872
CG1024	265.495	0.0864189	0.167037	0.517363	0.604903	0.726088
CG10249	1422.09	-0.542252	0.111359	-4.86939	1.11943e-06	1.02427e-05
CG10252	11.4234	-0.915678	1.06532	-0.859537	0.390045	0.534846
CG10253	592.731	0.0848003	0.136769	0.620027	0.53524	0.667041
CG10254	1590.73	-0.10475	0.126776	-0.826263	0.408655	0.553082
CG10257	313.741	-0.279178	0.163209	-1.71056	0.0871628	0.174276
CG10262	138.114	0.151372	0.191422	0.790776	0.429074	0.573052
CG10265	142.539	-0.1708	0.203987	-0.837307	0.40242	0.546593
CG10268	110.946	0.439215	0.291334	1.5076	0.131657	0.240119
CG10274	213.43	0.483314	0.201651	2.39679	0.0165395	0.0456598
CG10283	395.301	-0.012594	0.166877	-0.0754687	0.939842	0.963701
CG10286	161.572	0.319027	0.179694	1.77539	0.0758332	0.156423
CG10289	3498.24	-0.317085	0.118214	-2.68229	0.00731197	0.023375
CG10306	611.946	0.147635	0.190967	0.773092	0.439468	0.58283
CG10307	104.249	1.27981	0.243735	5.25084	1.51409e-07	1.70023e-06
CG10311	330.583	0.35461	0.220262	1.60994	0.10741	0.205514
CG10320	766.966	0.316272	0.143973	2.19675	0.0280385	0.0701312
CG10321	720.777	0.0671101	0.154773	0.433605	0.664576	0.773591
CG10324	153.519	0.586025	0.28113	2.08453	0.0371117	0.0879014
CG10326	1581.52	-0.376205	0.105384	-3.56986	0.000357172	0.00175578
CG10333	541.595	0.0168209	0.194065	0.0866767	0.930928	0.958261
CG10336	49.6921	2.38219	0.389822	6.11097	9.90243e-10	1.6831e-08
CG10337	12.7254	-1.19716	1.01092	-1.18424	0.23632	0.371673
CG10338	355.768	-0.00957633	0.142431	-0.0672348	0.946395	0.968362
CG10339	3.28076	2.89444	1.51398	1.91181	0.0559009	0.123049
CG10340	533.729	-0.129934	0.156856	-0.828362	0.407466	0.55189
CG10341	137.204	0.415539	0.194822	2.13292	0.0329312	0.080034
CG10343	123.843	0.261683	0.2532	1.0335	0.301369	0.443843
CG10344	31.4794	1.27774	0.476287	2.68271	0.00730281	0.0233598
CG10345	88.0443	0.554493	0.700073	0.79205	0.428332	0.572276
CG10347	224.919	0.337255	0.160659	2.0992	0.0357993	0.0856908
CG10348	11.2334	-1.15359	1.00381	-1.14921	0.250467	0.387633
CG10352	170.498	0.758385	0.222125	3.41422	0.000639656	0.00289521
CG10353	1636.02	0.157201	0.136858	1.14864	0.250703	0.387772
CG10359	66.8335	1.02214	0.312759	3.26815	0.00108252	0.00456516
CG10361	341.915	2.0097	0.163562	12.2871	1.06235e-34	3.0501e-32
CG10362	1317.98	-0.333609	0.125285	-2.66281	0.00774909	0.0245013
CG10365	580.09	0.00161204	0.136091	0.0118452	0.990549	0.993823
CG10366	337.804	0.43394	0.171483	2.5305	0.0113899	0.0335258
CG10375	313.121	0.168671	0.190597	0.884963	0.376177	0.520871
CG10376	543.384	-0.146201	0.133631	-1.09407	0.273926	0.414518
CG10383	691.712	-1.99187	0.574752	-3.46561	0.000529027	0.00246495
CG10384	2506.52	-0.462988	0.13858	-3.34094	0.000834964	0.00364713
CG10395	405.813	0.4543	0.157615	2.88234	0.00394731	0.0139217
CG10396	12.2341	2.54239	0.820207	3.09969	0.00193723	0.00759378
CG10399	36.0716	1.20905	0.420792	2.87327	0.0040625	0.0142617
CG10407	15.5281	-0.27544	0.544473	-0.505885	0.612938	0.73339
CG1041	376.73	0.474189	0.173676	2.7303	0.00632762	0.0206889
CG10413	1312.09	-0.333313	0.102297	-3.25828	0.00112091	0.00469907
CG10417	1741.59	0.0915893	0.0959636	0.954417	0.339873	0.484253
CG10418	110.102	0.326918	0.244231	1.33856	0.180713	0.306272
CG10420	268.047	0.130111	0.20413	0.637392	0.523869	0.657914
CG10424	169.802	0.549779	0.196844	2.79297	0.00522264	0.0175514
CG10425	171.371	0.469132	0.214688	2.18518	0.0288757	0.071778
CG10426	667.144	-0.589347	0.123409	-4.77556	1.79207e-06	1.57332e-05
CG10428	318.583	0.0335316	0.174682	0.191958	0.847775	0.904572
CG10431	68.6274	-0.299507	0.290881	-1.02965	0.303172	0.445696
CG10433	4106.65	0.725875	0.256529	2.8296	0.00466057	0.0159296
CG10435	292.917	0.00380715	0.199	0.0191315	0.984736	0.990837
CG10440	950.767	-1.03483	0.115457	-8.96288	3.16301e-19	1.95353e-17
CG10444	907.216	-0.590378	0.179692	-3.28549	0.00101805	0.00432588
CG10445	19.9422	1.5593	0.572705	2.72269	0.00647519	0.021087
CG10462	142.05	0.114237	0.248698	0.459342	0.645989	0.759444
CG10463	86.3261	1.0895	0.300699	3.62324	0.000290936	0.00146822
CG10465	876.114	0.0569309	0.187689	0.303325	0.761642	0.844685
CG10466	76.2721	-0.428872	0.284243	-1.50882	0.131345	0.239697
CG10467	154.669	0.880084	0.208215	4.2268	2.37035e-05	0.000159976
CG10469	57.6331	0.160551	0.305682	0.525224	0.599427	0.722227
CG10470	233.398	0.412173	0.186068	2.21517	0.0267482	0.0674611
CG10472	71.6004	1.59204	0.281333	5.65892	1.52325e-08	2.10339e-07
CG10479	410.729	-0.0283378	0.189669	-0.149407	0.881233	0.927365
CG10483	735.979	-0.816567	0.14254	-5.72869	1.01207e-08	1.45091e-07
CG10486	4.36271	4.35885	1.53764	2.83476	0.00458602	0.0157406
CG10492	998.119	-0.29937	0.112392	-2.66361	0.00773065	0.0244777
CG10494	121.3	0.0997519	0.29899	0.33363	0.738659	0.827791
CG10495	98.0066	0.505479	0.233863	2.16143	0.0306621	0.0754518
CG10508	2246.51	-0.306367	0.117671	-2.60359	0.00922537	0.0281936
CG10512	611.416	0.46034	0.130341	3.53182	0.00041271	0.00198202
CG10513	848.188	-0.708772	0.592539	-1.19616	0.231633	0.366784
CG10514	518.755	0.0264382	0.287475	0.0919668	0.926724	0.955693
CG10516	193.83	0.488202	0.228241	2.13898	0.0324375	0.0789605
CG10527	1594.26	0.592994	0.179562	3.30244	0.000958462	0.0041155
CG10543	2041.44	-0.406634	0.151907	-2.67685	0.00743168	0.0236864
CG10550	1436.6	-0.0109485	0.248556	-0.0440484	0.964866	0.978236
CG10553	206.906	-0.317033	0.348451	-0.909834	0.36291	0.507774
CG10555	857.443	-0.0986929	0.124377	-0.793501	0.427486	0.571525
CG10559	10.4694	-1.9663	1.30462	-1.50718	0.131765	0.240135
CG10560	165.397	1.40829	0.407833	3.4531	0.000554179	0.00256852
CG10561	663.732	-0.467705	0.14971	-3.12406	0.00178372	0.00704928
CG10562	174.799	0.826337	0.39513	2.09131	0.0365005	0.0868021
CG10565	834.112	0.237183	0.22432	1.05734	0.290356	0.432477
CG10566	538.702	-0.069075	0.141612	-0.487775	0.62571	0.74303
CG10576	757.575	0.589552	0.129709	4.54517	5.48899e-06	4.35146e-05
CG10581	37.7864	-1.46587	0.374943	-3.90959	9.24548e-05	0.000536503
CG10584	104.759	-0.123188	0.28509	-0.432104	0.665666	0.774435
CG10585	436.823	0.0135482	0.134611	0.100647	0.919831	0.951262
CG10590	631.642	0.00285827	0.122445	0.0233434	0.981376	0.988741
CG10600	1392.6	-0.265892	0.143319	-1.85524	0.063562	0.136113
CG10602	463.96	0.826305	0.154833	5.33674	9.46335e-08	1.10418e-06
CG10616	341.787	0.420956	0.146468	2.87404	0.00405253	0.0142361
CG10621	457.367	2.76659	0.375988	7.35819	1.86426e-13	5.48587e-12
CG10623	266.001	-0.971416	0.221594	-4.38376	1.1665e-05	8.48752e-05
CG10625	52.5454	-0.350467	0.388437	-0.902251	0.366924	0.511997
CG10628	193.373	0.445713	0.250869	1.77668	0.0756214	0.156016
CG10631	3847.23	-0.805191	0.195585	-4.11683	3.84121e-05	0.000247304
CG10635	369.532	0.445608	0.188452	2.36457	0.0180512	0.048854
CG10638	626.207	-0.0230705	0.129602	-0.17801	0.858715	0.911904
CG10639	605.645	0.18978	0.143862	1.31918	0.187109	0.314255
CG10646	166.792	-0.0564624	0.214801	-0.262859	0.792659	0.868711
CG10650	42.4927	0.277544	0.337431	0.822523	0.41078	0.554968
CG10654	883.597	0.0634415	0.141728	0.447629	0.654421	0.766811
CG10657	32.0778	-0.554511	0.615233	-0.901302	0.367428	0.512431
CG10660	284.163	0.253083	0.242501	1.04363	0.296655	0.439214
CG10663	32.7053	-1.18037	0.505666	-2.33429	0.0195806	0.0522395
CG10669	359.292	0.00942283	0.170391	0.0553011	0.955899	0.972806
CG10671	243.465	0.171012	0.166934	1.02443	0.305632	0.448133
CG10672	409.889	0.128791	0.170573	0.75505	0.450219	0.592135
CG10674	119.55	0.455422	0.243489	1.8704	0.0614283	0.132413
CG10680	383.347	2.11864	0.355976	5.95165	2.65456e-09	4.22146e-08
CG10681	120.415	-0.510778	0.222927	-2.29123	0.0219502	0.0572777
CG10688	141.752	1.25491	0.213054	5.89009	3.85976e-09	5.9683e-08
CG10694	2.16781	0.6759	1.91803	0.352393	0.724544
CG10700	9.72117	-1.32502	0.834576	-1.58765	0.112365	0.212947
CG10702	1031.84	-0.965663	0.176829	-5.46099	4.73497e-08	5.89678e-07
CG10710	34.3138	-0.127513	0.424683	-0.300255	0.763983	0.846364
CG10713	553.258	-0.751329	0.117636	-6.38692	1.69262e-10	3.31136e-09
CG10721	258.019	0.111523	0.181235	0.61535	0.538324	0.669705
CG10730	3.67592	0.960391	1.43868	0.66755	0.504421	0.642216
CG10731	117.899	0.118002	0.220908	0.534168	0.593225	0.716606
CG10732	540.218	-0.0721692	0.163954	-0.440179	0.659808	0.76956
CG10734	6.40548	-0.528231	0.963205	-0.54841	0.583411	0.708294
CG10737	1853.22	-0.203031	0.104349	-1.94569	0.0516918	0.115556
CG10738	251.061	-1.13226	0.20357	-5.56202	2.66673e-08	3.52346e-07
CG1074	296.95	0.273563	0.154149	1.77466	0.0759538	0.156611
CG10747	318.073	-0.0942411	0.145787	-0.646428	0.518002	0.65392
CG10750	1.76371	-0.483638	1.73814	-0.27825	0.78082
CG10754	173.09	0.510802	0.180349	2.8323	0.00462151	0.015842
CG10764	2.84507	-0.219004	1.34387	-0.162965	0.870546	0.920114
CG1077	5.44977	-0.25547	0.93604	-0.272926	0.78491	0.862621
CG10777	5092.49	-0.461335	0.160674	-2.87124	0.00408861	0.0143439
CG10778	129.376	0.411264	0.241804	1.70082	0.0889774	0.17706
CG10793	2.14807	-0.944134	1.48465	-0.635931	0.524821
CG10795	161.876	0.0599572	0.18946	0.316464	0.75165	0.837534
CG10799	205.548	3.69874	0.449834	8.22246	1.99369e-16	8.53991e-15
CG10801	2.18742	0.216988	2.34887	0.0923796	0.926396
CG10802	409.776	0.084991	0.147661	0.575582	0.564898	0.692226
CG10803	1294.89	0.00697698	0.134956	0.051698	0.958769	0.974455
CG10804	3633.16	-1.05212	0.11342	-9.27624	1.75564e-20	1.26872e-18
CG10809	348.258	-0.227969	0.134518	-1.6947	0.0901317	0.179033
CG10814	14.7424	3.35213	1.0713	3.12904	0.00175377	0.00694643
CG10824	85.1492	3.03262	0.511769	5.92575	3.10867e-09	4.87071e-08
CG10830	7353.82	-0.929479	0.088084	-10.5522	4.96304e-26	6.84706e-24
CG10841	2.46461	0.536991	1.33745	0.401505	0.688049	0.791204
CG10863	1458.95	1.06803	0.128905	8.28538	1.17735e-16	5.18962e-15
CG10864	35.2524	-0.157902	0.465736	-0.339037	0.734582	0.825269
CG10866	302.807	-0.695718	0.174534	-3.98614	6.71568e-05	0.000406963
CG10869	11.7426	0.64158	0.946551	0.677809	0.497893	0.636806
CG10874	289.019	0.117738	0.179987	0.654147	0.513017	0.649441
CG10877	21.4713	-0.159084	0.52043	-0.305678	0.75985	0.843722
CG10880	116.268	-0.272127	0.216195	-1.25871	0.208136	0.339414
CG10889	57.5098	-0.346769	0.291074	-1.19134	0.233519	0.368928
CG10898	220.626	-0.0289654	0.168595	-0.171805	0.863591	0.91474
CG1090	5887.86	-0.928024	0.189409	-4.89956	9.60498e-07	8.90522e-06
CG10903	136.859	0.463393	0.206642	2.24249	0.0249298	0.0636456
CG10904	160.85	0.075297	0.178971	0.420722	0.673958	0.780748
CG10907	143.364	0.373969	0.266913	1.40109	0.161187	0.280819
CG1091	597.543	-0.191615	0.117669	-1.62842	0.103435	0.199164
CG10912	1.70707	0.0722482	1.74359	0.0414364	0.966948
CG10914	130.459	0.330757	0.216827	1.52544	0.127149	0.233969
CG10915	1385.43	-0.285013	0.129528	-2.2004	0.0277786	0.0696137
CG10916	179.279	0.476272	0.169955	2.80234	0.00507335	0.017144
CG10918	10.7291	-0.902042	0.725462	-1.2434	0.213719	0.345719
CG10919	2.4326	0.967833	1.50084	0.644859	0.519019	0.654425
CG1092	235.991	1.38039	0.20951	6.58863	4.43914e-11	9.76336e-10
CG10924	16.4753	-0.285153	0.8503	-0.335355	0.737357	0.826958
CG10927	28.677	0.727819	0.421255	1.72774	0.0840353	0.169652
CG10932	233.548	0.86157	0.218892	3.93606	8.28303e-05	0.000488024
CG10933	5.45466	0.39409	1.09173	0.360976	0.718118	0.814582
CG10934	1.71367	1.03146	1.6527	0.624107	0.532558
CG10936	1643.86	-2.04331	0.169859	-12.0295	2.48805e-33	6.77707e-31
CG10947	487.311	-0.76108	0.158923	-4.78898	1.67627e-06	1.48022e-05
CG10948	1301.66	-0.201598	0.151218	-1.33316	0.18248	0.308528
CG10949	201.871	0.331188	0.251508	1.31681	0.187902	0.315188
CG10958	186	0.206539	0.200927	1.02793	0.303985	0.446643
CG10959	78.2345	0.24415	0.284148	0.859236	0.39021	0.535003
CG10960	5684.52	0.00555195	0.121936	0.0455317	0.963683	0.977579
CG10962	29.9452	2.38541	0.53574	4.45255	8.48568e-06	6.39315e-05
CG10970	7.62723	-0.492859	0.763011	-0.645939	0.518319	0.654009
CG10973	234.014	-0.0828001	0.196656	-0.421041	0.673725	0.780563
CG10979	553.783	-0.0402251	0.154816	-0.259825	0.794999	0.870467
CG10984	1123.37	-0.116739	0.137268	-0.850448	0.395076	0.539447
CG10993	1.74267	-1.06965	2.35242	-0.454703	0.649323
CG11000	7611.62	-0.709881	0.155901	-4.55342	5.27816e-06	4.20629e-05
CG11007	302.147	0.0727898	0.174371	0.417442	0.676355	0.782245
CG11029	34.202	-0.948068	0.766781	-1.23643	0.2163	0.34878
CG1103	104.82	0.0517789	0.229054	0.226056	0.821158	0.887551
CG11030	1356.41	-0.138857	0.150234	-0.924271	0.355345	0.500641
CG11034	18.5415	0.621008	0.522878	1.18767	0.234963	0.370411
CG11035	172.762	-0.547288	0.201541	-2.71552	0.00661717	0.0214573
CG1104	635.788	0.280678	0.128575	2.18299	0.0290368	0.0721032
CG11041	5.2212	2.58013	1.09354	2.35942	0.0183037	0.0493919
CG11043	13.7933	-0.357844	0.69066	-0.518119	0.604375	0.725804
CG11044	7.22883	-1.08092	0.886438	-1.21939	0.222696	0.356709
CG1105	390.443	0.239926	0.167124	1.43562	0.151112	0.267633
CG11050	1482.35	-0.150415	0.130406	-1.15344	0.24873	0.385675
CG11060	2.45768	0.529737	1.36548	0.387948	0.698054	0.798474
CG11069	11.5796	-0.682668	0.62589	-1.09072	0.275398	0.416212
CG11070	646.186	-0.206232	0.138789	-1.48594	0.137295	0.248042
CG11073	108.182	-0.76713	0.358327	-2.14087	0.0322847	0.0787149
CG11076	1527.48	-0.452642	0.0913953	-4.95257	7.32379e-07	6.99646e-06
CG11077	238.359	0.163905	0.265706	0.616866	0.537323	0.668931
CG11085	112.581	-0.431355	0.262158	-1.6454	0.0998871	0.193897
CG11089	847.855	1.53083	0.381179	4.01605	5.91816e-05	0.000363192
CG1109	419.731	0.521421	0.137409	3.79465	0.00014785	0.000808762
CG11095	109.459	-0.12233	0.222965	-0.54865	0.583246	0.708175
CG11099	2256.6	-0.357867	0.0802308	-4.46047	8.17798e-06	6.20977e-05
CG11103	139.502	0.0133174	0.200812	0.0663177	0.947125	0.968774
CG11106	4.34949	-3.14462	1.82165	-1.72625	0.0843031	0.170128
CG11107	643.501	0.22461	0.124081	1.81018	0.0702672	0.147393
CG11109	182.101	-0.111785	0.186905	-0.598084	0.549784	0.679901
CG11110	77.157	0.27561	0.305898	0.900988	0.367595	0.512596
CG11122	2357	-0.374011	0.238749	-1.56655	0.117221	0.220015
CG11123	147.116	0.383411	0.20974	1.82802	0.067546	0.142738
CG11125	40.1883	0.513086	0.488103	1.05118	0.293175	0.435824
CG11127	226.278	-0.244527	0.178837	-1.36731	0.171527	0.294367
CG1113	3.44949	1.18272	1.32869	0.890139	0.373391	0.518501
CG11134	110.642	1.14076	0.239162	4.76984	1.84377e-06	1.6147e-05
CG11137	619.652	0.406015	0.179588	2.26081	0.0237709	0.0612759
CG11138	4184.38	-0.626273	0.0848683	-7.37936	1.59056e-13	4.71971e-12
CG11141	502.737	-0.0302285	0.131312	-0.230203	0.817934	0.885528
CG11147	217.05	0.136553	0.302564	0.451321	0.651758	0.764535
CG11148	5745.38	-0.449946	0.14545	-3.09347	0.00197831	0.00773468
CG11151	807.118	0.225514	0.135993	1.65827	0.0972629	0.190001
CG11155	8814.74	-1.02753	0.109153	-9.41369	4.79032e-21	3.71442e-19
CG11158	95.2863	0.392108	0.327916	1.19576	0.23179	0.366961
CG11159	34.9016	-3.19041	0.787325	-4.05221	5.07351e-05	0.00031629
CG1116	361.515	-0.0101178	0.14001	-0.072265	0.942391	0.965299
CG11160	30.4661	-0.812149	0.481146	-1.68795	0.0914213	0.181019
CG11164	19.3636	0.914919	0.506292	1.8071	0.0707468	0.148058
CG11168	199.321	0.56755	0.165847	3.42214	0.00062131	0.00282784
CG11170	58.4798	0.572056	0.285301	2.00509	0.0449531	0.103184
CG11178	463.021	-9.84172e-05	0.134748	-0.000730378	0.999417	0.9997
CG11180	173.922	0.781245	0.228077	3.42536	0.000613979	0.00280529
CG11190	829.648	0.222571	0.115853	1.92115	0.0547127	0.120885
CG11191	809.525	0.494733	0.206969	2.39038	0.0168311	0.0462845
CG11200	137.93	0.247553	0.220042	1.12503	0.260577	0.399064
CG11208	367.585	0.318477	0.163318	1.95004	0.0511715	0.114658
CG11210	841.623	-0.206736	0.126363	-1.63606	0.101828	0.196656
CG11211	6.68995	-1.70549	1.55281	-1.09833	0.272062	0.412344
CG11221	898.668	-0.726055	0.146506	-4.95582	7.20274e-07	6.90375e-06
CG11226	2.22771	0.103569	1.62995	0.0635414	0.949335
CG11236	73.0662	3.16623	0.393774	8.04074	8.92943e-16	3.50027e-14
CG1124	75.2242	-2.03308	0.671633	-3.02706	0.00246941	0.00933211
CG11241	374.268	1.17917	0.194728	6.05545	1.40024e-09	2.32056e-08
CG11247	1779.44	0.151497	0.0996388	1.52046	0.128395	0.235854
CG11248	787.321	-0.108548	0.119263	-0.910157	0.36274	0.507625
CG11257	95.8405	0.215564	0.278679	0.773522	0.439214	0.582701
CG1126	1.60798	2.81124	1.9585	1.43541	0.151171
CG11261	28.8876	0.924782	0.490542	1.88523	0.0593993	0.129091
CG11263	11.0205	-0.690616	0.690496	-1.00017	0.317227	0.46018
CG11266	3637.34	-0.186107	0.154395	-1.20539	0.228051	0.362554
CG11267	1108.16	0.425707	0.133098	3.19844	0.00138175	0.00564333
CG11275	112.376	0.255824	0.243834	1.04917	0.294099	0.43677
CG11279	192.828	0.571214	0.228909	2.49538	0.0125824	0.0363806
CG11284	587.424	0.214266	0.146747	1.46011	0.14426	0.258341
CG1129	338.269	0.444515	0.14469	3.07219	0.00212492	0.00821735
CG11294	198.216	-0.318179	0.317964	-1.00067	0.316984	0.459954
CG11306	1051.75	0.0668328	0.0971083	0.688229	0.491308	0.630469
CG11307	188.196	0.241449	0.188248	1.28261	0.199628	0.329755
CG11309	422.148	1.0135	0.154852	6.54499	5.94998e-11	1.28469e-09
CG11317	1686.62	-0.500764	0.16722	-2.99464	0.00274769	0.0102166
CG11318	4.5474	1.95816	1.10493	1.77221	0.07636	0.157326
CG11319	9105.92	-0.91334	0.164413	-5.55516	2.77351e-08	3.65546e-07
CG11320	6.75115	0.666621	0.988888	0.674112	0.50024	0.638443
CG11321	29.8551	-0.92594	0.462145	-2.00357	0.0451159	0.103446
CG11329	3.77516	-0.936791	1.0738	-0.872405	0.382988	0.527905
CG11334	215.353	1.99837	0.270374	7.39111	1.45612e-13	4.38198e-12
CG11337	144.426	0.191236	0.202366	0.945001	0.344658	0.489283
CG11342	33.5816	0.620136	0.495663	1.25112	0.210889	0.342445
CG11353	10.8475	-2.24009	1.48245	-1.51107	0.13077	0.238853
CG11357	1274.36	-0.586345	0.110574	-5.30276	1.14066e-07	1.31709e-06
CG1136	32.8791	-1.34945	0.485925	-2.77708	0.00548494	0.0183286
CG11360	5455.77	-0.0855485	0.232304	-0.368262	0.712678	0.809796
CG11367	164.762	-0.490725	0.201679	-2.4332	0.0149662	0.0419931
CG11368	73.3851	0.732495	0.63385	1.15563	0.247834	0.384566
CG1137	31.8584	-1.56846	0.807625	-1.94206	0.0521296	0.116314
CG11370	9.20802	-1.9922	1.07753	-1.84886	0.0644786	0.137541
CG11374	144.759	-1.3339	0.532343	-2.50571	0.0122205	0.0355125
CG11377	424.141	0.569363	0.194547	2.92661	0.00342681	0.0123525
CG11378	160.793	-0.875436	0.386026	-2.26782	0.0233402	0.060415
CG11380	3.72375	-4.51809	1.71241	-2.63844	0.00832884	0.0258932
CG11388	1100.34	-0.507424	0.123784	-4.09927	4.14462e-05	0.00026482
CG11391	66.3139	4.33028	0.530824	8.15765	3.41599e-16	1.44574e-14
CG11395	445.904	2.87063	0.393023	7.30398	2.79383e-13	8.08687e-12
CG11396	413.806	-0.160127	0.136749	-1.17096	0.241615	0.377564
CG11398	89.4713	0.429662	0.240451	1.7869	0.0739536	0.153418
CG11399	1248.76	-0.293172	0.12521	-2.34144	0.0192095	0.0514399
CG11400	145.036	2.73467	0.50707	5.39308	6.92588e-08	8.36064e-07
CG11403	62.5996	1.03291	0.312314	3.30729	0.000942049	0.00405486
CG11406	46.6261	-0.285016	0.366702	-0.777241	0.437016	0.580811
CG11407	573.782	0.0935586	0.281628	0.332206	0.739734	0.828573
CG11409	3.12252	0.859574	1.16699	0.736574	0.461381	0.602712
CG11412	522.685	-0.108619	0.170214	-0.63813	0.523389	0.657672
CG11413	462.117	-4.71858	0.834896	-5.6517	1.58865e-08	2.18321e-07
CG11414	574.886	-0.280326	0.132048	-2.12291	0.0337612	0.0817892
CG11417	147.291	1.07738	0.312568	3.44687	0.00056713	0.00262282
CG11418	129.467	0.485791	0.229423	2.11744	0.0342223	0.082661
CG1142	226.754	0.2895	0.237393	1.2195	0.222656	0.356699
CG11423	7.06079	-1.7492	2.05795	-0.849969	0.395342	0.539591
CG11425	43.926	1.40149	0.704458	1.98947	0.0466499	0.106275
CG11426	396.532	-0.253565	0.161463	-1.57043	0.116316	0.218772
CG1143	43.6775	2.48973	0.424484	5.86531	4.48293e-09	6.84227e-08
CG11436	214.633	0.260864	0.226237	1.15306	0.248887	0.385749
CG11438	7.63357	-2.29549	0.994881	-2.3073	0.021038	0.0554972
CG11444	433.121	0.413046	0.166077	2.48707	0.0128799	0.0371297
CG11447	104.261	0.269133	0.28678	0.938464	0.348006	0.492456
CG11448	5100.95	-0.413499	0.0969276	-4.26606	1.98958e-05	0.000136445
CG11453	3.86955	-0.533054	1.32887	-0.401134	0.688321	0.791271
CG11454	240.636	0.236807	0.173073	1.36825	0.171234	0.294007
CG11455	1211.25	-0.0964141	0.137464	-0.701376	0.483068	0.622696
CG11456	268.609	0.0956966	0.150548	0.635655	0.525001	0.658701
CG11458	2.0493	-4.69867	2.55774	-1.83704	0.0662039
CG11459	6.69434	2.2097	1.23671	1.78675	0.0739779	0.15343
CG1146	315.747	-0.389307	0.22009	-1.76885	0.0769184	0.158415
CG11474	586.903	-0.207649	0.161722	-1.28399	0.199147	0.329266
CG11475	76.7978	-0.82472	0.312389	-2.64004	0.00828961	0.0257788
CG11486	5261.4	-0.485944	0.077059	-6.30613	2.86097e-10	5.46619e-09
CG11498	1.84942	1.89109	1.68083	1.1251	0.260548
CG11504	350.154	0.134166	0.166476	0.80592	0.420289	0.564227
CG11505	4992.81	-0.614854	0.16468	-3.73362	0.000188747	0.00100103
CG11509	252.624	-0.974893	0.192864	-5.05483	4.30778e-07	4.32529e-06
CG11523	222.588	0.257988	0.242565	1.06358	0.287518	0.429458
CG11526	1084.18	-0.482094	0.12852	-3.75111	0.000176057	0.000939352
CG11529	3.6682	4.07759	2.06296	1.97657	0.04809	0.108949
CG11534	185.528	-0.0532869	0.181998	-0.292789	0.769683	0.851051
CG11537	4131.6	-0.673958	0.110551	-6.09635	1.08516e-09	1.82978e-08
CG11539	47.3684	0.155108	0.351124	0.441747	0.658672	0.768896
CG11550	15.7807	0.526304	1.09095	0.482425	0.629504	0.74606
CG11555	99.1678	-0.122647	0.255517	-0.479997	0.63123	0.747387
CG11560	131.9	0.0993731	0.233342	0.425868	0.670204	0.777546
CG11562	106.034	0.0011523	0.266934	0.00431679	0.996556	0.997871
CG11563	111.494	0.561211	0.220751	2.54228	0.0110131	0.0326977
CG11576	578.52	-0.450908	0.121087	-3.72383	0.000196227	0.00103604
CG11577	421.315	0.750302	0.144069	5.20793	1.90955e-07	2.09592e-06
CG11583	161.862	0.576521	0.185829	3.10243	0.00191937	0.00752936
CG11586	156.034	0.241251	0.280024	0.861536	0.388943	0.533886
CG11590	129.956	0.281706	0.20843	1.35156	0.176515	0.300885
CG11593	765.219	-0.193597	0.117154	-1.6525	0.0984324	0.191827
CG11594	570.204	2.39044	0.24063	9.93407	2.95928e-23	3.14365e-21
CG11596	274.815	0.278855	0.175216	1.59149	0.1115	0.211512
CG11597	112.043	-0.530178	0.236579	-2.24102	0.0250249	0.0638578
CG11601	242.331	-0.0373087	0.186079	-0.200499	0.841091	0.900242
CG1161	753.956	-0.339295	0.117705	-2.88259	0.00394425	0.0139202
CG11617	6.12224	0.621307	0.881109	0.705142	0.480722	0.620673
CG11619	174.911	0.330607	0.229387	1.44127	0.14951	0.265326
CG11626	32.4601	0.491746	0.440127	1.11728	0.263874	0.402641
CG11635	19.7432	-3.11458	1.20852	-2.5772	0.00996053	0.0301198
CG11638	1878.88	-0.469969	0.138009	-3.40535	0.000660792	0.00297441
CG11652	337.242	0.42195	0.170809	2.4703	0.0135	0.0386844
CG11655	161.779	0.691091	0.19643	3.51826	0.000434382	0.00207484
CG11658	1668.41	-0.775771	0.127323	-6.09293	1.1086e-09	1.86634e-08
CG11665	1989.16	-0.226429	0.144792	-1.56383	0.117859	0.221047
CG11668	164.641	1.62086	0.285696	5.67337	1.40018e-08	1.94433e-07
CG11671	1.96478	3.09038	1.86182	1.65987	0.0969408
CG11672	8.98929	3.23746	1.85808	1.74237	0.0814436	0.165552
CG11674	3.73226	2.47692	1.25874	1.96778	0.0490935	0.110867
CG11679	71.793	0.485999	0.257398	1.88812	0.0590102	0.128403
CG11686	61.9383	-0.218082	0.437696	-0.498249	0.618309	0.737431
CG11695	200.588	0.651423	0.21718	2.99946	0.00270458	0.0100793
CG11696	214.851	0.142437	0.228243	0.624056	0.532591	0.664909
CG11697	2.89155	-2.47035	1.72863	-1.42908	0.15298	0.270115
CG11699	519.213	-0.13489	0.222868	-0.605245	0.545016	0.675579
CG11700	279.151	-0.353159	0.230508	-1.53209	0.125501	0.231699
CG11710	395.085	0.215325	0.170396	1.26367	0.206347	0.337546
CG11714	9.70885	-0.729606	0.9249	-0.788848	0.430201	0.574123
CG1172	600.357	0.156242	0.115394	1.35399	0.175739	0.299804
CG11722	211.715	-0.0749041	0.168063	-0.445691	0.655821	0.767605
CG11723	282.793	0.292604	0.162534	1.80026	0.0718188	0.149918
CG11737	391.672	-0.0838225	0.168922	-0.496219	0.61974	0.738557
CG11739	915.147	0.167223	0.136184	1.22792	0.219476	0.352669
CG11741	11.7707	4.90048	1.19393	4.10451	4.05177e-05	0.000259758
CG11752	532.513	-0.467129	0.133829	-3.49048	0.000482161	0.00227341
CG11753	183.59	-0.451066	0.251554	-1.79312	0.0729542	0.152019
CG11755	67.3853	0.0554168	0.283127	0.195731	0.844821	0.903234
CG11760	4.66738	-0.0787329	1.06201	-0.0741359	0.940902	0.964602
CG11768	2.97659	0.225156	1.21556	0.185228	0.85305	0.908102
CG11771	743.229	0.057338	0.141622	0.404866	0.685576	0.789313
CG11777	74.6157	-0.0448849	0.251255	-0.178643	0.858218	0.911794
CG11779	724.147	-0.0531529	0.130099	-0.408557	0.682865	0.787315
CG11781	153.447	0.139215	0.215216	0.646861	0.517722	0.653722
CG11788	108.954	0.57853	0.263822	2.19288	0.0283157	0.0706097
CG11790	615.879	0.395429	0.152605	2.59119	0.00956439	0.0290958
CG11791	708.072	-0.000452449	0.151088	-0.00299461	0.997611	0.998613
CG11796	43.6427	1.09247	0.505281	2.1621	0.0306105	0.0753768
CG11802	364.231	0.0540927	0.152495	0.354717	0.722802	0.817539
CG11807	627.741	0.0348349	0.159909	0.217841	0.827553	0.891831
CG11808	58.9758	0.60065	0.339841	1.76744	0.0771539	0.158796
CG11811	404.603	-0.013915	0.14438	-0.0963782	0.92322	0.953468
CG11825	14.2442	1.14581	0.690254	1.65999	0.0969171	0.18958
CG11828	4.88029	-1.2521	0.938825	-1.33369	0.182307	0.308431
CG11835	19.5174	0.453705	0.534572	0.848726	0.396034	0.540268
CG11836	27.9407	1.7275	0.482404	3.58103	0.000342248	0.00169278
CG11837	80.339	0.718029	0.282536	2.54137	0.0110418	0.0327463
CG11839	57.2346	0.492396	0.335172	1.46908	0.14181	0.254639
CG11841	47.8231	2.48632	0.554786	4.48159	7.40892e-06	5.68677e-05
CG11842	20.6773	1.09171	0.751856	1.45202	0.146495	0.261417
CG11851	178.781	0.572711	0.198618	2.88348	0.0039331	0.0138855
CG11852	65.3805	-4.97612	0.758895	-6.55706	5.48802e-11	1.18978e-09
CG11857	1012.22	0.108925	0.0959376	1.13537	0.256219	0.393668
CG11858	107.077	1.02052	0.339898	3.00243	0.00267833	0.00999717
CG11873	4355.99	-0.949351	0.242718	-3.91133	9.17908e-05	0.000533129
CG11876	2381.34	-0.279777	0.18113	-1.54462	0.122438	0.227547
CG11878	1.75427	0.438309	1.5347	0.285599	0.775185
CG11880	910.656	-0.911622	0.161425	-5.64735	1.62944e-08	2.23349e-07
CG11882	46.1235	0.444773	0.354333	1.25524	0.209391	0.340741
CG11883	2040.41	-0.599927	0.10142	-5.91526	3.31353e-09	5.17641e-08
CG11885	62.4482	0.230026	0.341948	0.672694	0.501142	0.638826
CG11892	166.044	-0.280145	0.241308	-1.16094	0.245665	0.382373
CG11893	1.67322	-0.439126	1.75315	-0.250478	0.802218
CG11897	597.762	-0.386981	0.156677	-2.46993	0.013514	0.0387056
CG11898	3.37499	-2.74608	1.66105	-1.65321	0.0982872	0.191614
CG11899	319.533	1.06787	0.214506	4.97829	6.4149e-07	6.24042e-06
CG11902	599.438	0.0177586	0.150577	0.117937	0.906117	0.94277
CG11905	3.64193	-4.49054	1.61841	-2.77467	0.00552582	0.018442
CG11906	172.656	0.193974	0.217249	0.892865	0.371929	0.517147
CG11920	103.357	0.38623	0.243935	1.58333	0.113345	0.214323
CG11927	234.251	0.185258	0.191873	0.965522	0.334284	0.478551
CG11951	30.3357	1.00125	0.812958	1.23161	0.218095	0.350981
CG11961	330.775	0.504276	0.220235	2.28972	0.0220377	0.0574776
CG11964	322.33	0.548186	0.208248	2.63237	0.00847914	0.0262606
CG11970	757.873	-0.176007	0.148415	-1.18591	0.235657	0.370982
CG11975	522.142	-0.205583	0.130366	-1.57696	0.114805	0.21639
CG11980	337.023	0.290263	0.150565	1.92782	0.0538775	0.119437
CG11982	477.723	0.331892	0.180803	1.83565	0.0664092	0.140755
CG11983	71.9059	-0.226135	0.295586	-0.765041	0.444247	0.587116
CG11984	1737.61	-0.0401794	0.165424	-0.242887	0.808093	0.879366
CG11985	209.853	0.0716097	0.250981	0.285319	0.7754	0.855622
CG11986	104.486	0.376485	0.305618	1.23188	0.217993	0.350915
CG11997	5.22277	-0.829416	0.97221	-0.853125	0.39359	0.538109
CG11999	196.605	0.927645	0.214998	4.31467	1.59841e-05	0.000111636
CG12003	27.7776	-8.4486	3.9086	-2.16154
CG12004	2303.72	-0.45588	0.0961454	-4.74157	2.12069e-06	1.82413e-05
CG12006	405.209	-0.0197569	0.156275	-0.126424	0.899397	0.937742
CG12007	276.702	0.33411	0.242373	1.37849	0.168051	0.289807
CG12010	74.9299	-0.380697	0.292308	-1.30238	0.192785	0.321249
CG12011	6.63724	0.40017	0.818248	0.489057	0.624801	0.742257
CG12012	395.801	0.112603	0.160136	0.703171	0.481949	0.621857
CG12014	178.615	-0.242056	0.230939	-1.04814	0.294575	0.437233
CG12018	88.6273	0.277536	0.255819	1.08489	0.277968	0.419202
CG12024	1011.11	-0.0439878	0.118741	-0.370453	0.711045	0.808545
CG12025	2427.78	-0.278162	0.127727	-2.17778	0.0294223	0.0728222
CG12027	6.00851	-2.8475	1.46511	-1.94354	0.051951	0.115989
CG12034	337.492	-0.231786	0.146567	-1.58144	0.113778	0.214913
CG12038	817.291	0.255536	0.108731	2.35017	0.0187646	0.0504393
CG12042	379.668	-0.111825	0.129917	-0.860742	0.38938	0.534279
CG12050	254.325	0.564641	0.192951	2.92635	0.00342969	0.0123588
CG12054	3518.06	-0.516237	0.120714	-4.27652	1.89837e-05	0.000130696
CG12056	170.087	0.0520826	0.224934	0.231546	0.816891	0.885117
CG12065	849.557	-0.294731	0.235553	-1.25123	0.210852	0.342437
CG12071	1526.29	-0.14331	0.143012	-1.00209	0.316301	0.459277
CG12075	19.3223	-0.361615	0.523853	-0.690299	0.490006	0.629424
CG1208	130.042	-1.05242	0.331885	-3.17104	0.00151892	0.00612121
CG12081	325.671	-0.497951	0.213039	-2.33738	0.0194196	0.051911
CG12082	397.343	0.227254	0.208043	1.09234	0.274683	0.415367
CG12084	1629.14	-0.249544	0.104529	-2.38731	0.0169723	0.0466004
CG12090	1791.47	0.17044	0.118909	1.43336	0.151755	0.268548
CG12091	2303.47	-0.0600027	0.140669	-0.426553	0.669705	0.777241
CG12093	270.856	0.446554	0.147234	3.03296	0.00242168	0.0091713
CG12096	307.907	-0.336095	0.150214	-2.23744	0.0252573	0.0643117
CG12099	1615.92	-0.236534	0.146669	-1.61271	0.106807	0.204608
CG12104	194.406	0.247466	0.179781	1.37649	0.16867	0.290637
CG12105	42.5282	-2.27069	0.457122	-4.96736	6.78706e-07	6.55445e-06
CG12106	160.579	-0.157068	0.195786	-0.802241	0.422414	0.566127
CG12107	292.532	0.297172	0.175429	1.69398	0.0902699	0.179216
CG12112	62.3771	-0.537238	0.284117	-1.8909	0.0586371	0.127775
CG12116	250.602	1.86213	0.416894	4.46668	7.94417e-06	6.05387e-05
CG12118	296.984	-0.133227	0.155223	-0.858291	0.390732	0.535442
CG12119	5.59385	-3.55811	1.30756	-2.72118	0.00650497	0.0211581
CG12121	1024.67	-0.304997	0.0966082	-3.15705	0.00159373	0.00635997
CG12123	225.252	0.391662	0.166551	2.3516	0.0186927	0.0502714
CG12125	602.199	-0.109328	0.126448	-0.864608	0.387254	0.532566
CG12128	306.611	0.0809421	0.154317	0.524517	0.599919	0.722598
CG12129	198.493	0.323149	0.183655	1.75954	0.0784852	0.160738
CG1213	1123.12	0.566795	0.28472	1.99071	0.046513	0.106054
CG12134	57.1013	0.661535	0.380046	1.74067	0.0817417	0.165954
CG12155	515.04	-0.1457	0.16703	-0.872299	0.383045	0.527905
CG12158	11.1997	-2.04347	0.924277	-2.21089	0.0270437	0.0680933
CG12159	304.583	0.0861689	0.14899	0.578354	0.563025	0.690489
CG12162	594.752	0.0652322	0.167342	0.389814	0.696674	0.797323
CG12163	3037.37	-0.104574	0.199688	-0.523686	0.600497	0.723006
CG12170	228.896	0.431154	0.223128	1.93232	0.0533205	0.118499
CG12171	192.648	0.689176	0.194562	3.5422	0.000396805	0.00191516
CG12173	284.58	0.237148	0.158716	1.49416	0.135133	0.244844
CG12177	664.438	0.455922	0.285603	1.59635	0.110412	0.209983
CG12179	137.527	0.150686	0.203657	0.7399	0.459361	0.600695
CG1218	140.192	0.299867	0.286562	1.04643	0.295363	0.437973
CG12182	268.502	-0.0154097	0.148567	-0.103723	0.917389	0.949477
CG12184	7.61615	0.181847	0.750596	0.24227	0.808571	0.879616
CG12194	2301.71	-0.263615	0.0969559	-2.71892	0.0065496	0.0212743
CG12203	976.64	0.0196698	0.176437	0.111483	0.911233	0.945777
CG12204	76.3638	1.0839	0.37885	2.86102	0.0042228	0.0147465
CG12206	3.65384	0.514491	1.0958	0.469513	0.638703	0.753667
CG12207	930.915	-0.130533	0.10389	-1.25645	0.208952	0.340183
CG12213	1625.13	-0.195104	0.123246	-1.58305	0.113411	0.21437
CG12219	183.889	0.192553	0.208186	0.924912	0.355012	0.500304
CG12224	15.0524	1.61733	0.702276	2.30298	0.0212799	0.055911
CG12229	3.49171	-0.97039	1.77264	-0.547427	0.584085	0.70887
CG12236	746.112	-0.0865801	0.117813	-0.734893	0.462405	0.603604
CG12237	998.431	0.0919359	0.215893	0.42584	0.670224	0.777546
CG12239	11440.1	0.80197	0.198189	4.04648	5.19936e-05	0.000323188
CG12241	597.059	0.210713	0.17708	1.18993	0.234074	0.36953
CG12253	242.256	-0.0229869	0.159631	-0.144	0.8855	0.929907
CG12256	641.111	6.11426	0.367302	16.6464	3.21433e-62	5.87244e-59
CG12259	106.831	0.616724	0.29532	2.08832	0.0367687	0.0872641
CG12262	1170.95	0.458555	0.174662	2.62538	0.00865516	0.026689
CG12263	494.534	-0.0234835	0.143124	-0.164078	0.86967	0.919437
CG12264	507.579	0.302422	0.172272	1.75549	0.0791755	0.161809
CG12267	88.5168	0.373295	0.234376	1.59272	0.111224	0.211214
CG12268	18.8274	-4.1454	1.02642	-4.03869	5.37511e-05	0.000332556
CG12269	1674.93	2.00735	0.126963	15.8105	2.63183e-56	3.49474e-53
CG1227	112.616	0.604666	0.247964	2.43852	0.0147475	0.0414891
CG12272	575.216	-0.0970549	0.127575	-0.760769	0.446795	0.589164
CG12278	8.46333	0.445348	0.767573	0.580203	0.561778	0.689596
CG12279	151.503	0.408749	0.201053	2.03305	0.0420477	0.0979037
CG12288	56.9887	1.38389	0.364261	3.79916	0.000145185	0.00079541
CG12290	972.696	-0.355791	0.12097	-2.94116	0.0032699	0.0118878
CG12299	875.331	-0.228629	0.143557	-1.59261	0.111248	0.211222
CG12301	140.443	0.533317	0.20754	2.56971	0.0101785	0.0306915
CG12304	343.259	0.36531	0.156499	2.33427	0.0195818	0.0522395
CG1231	164.141	-0.17286	0.205556	-0.840938	0.400383	0.544383
CG12310	3.71231	-0.623208	2.25774	-0.276032	0.782524	0.861068
CG12316	595.246	-0.112051	0.1179	-0.950395	0.341912	0.486164
CG12320	117.144	0.268566	0.207965	1.2914	0.196565	0.326217
CG12321	117.71	0.220206	0.222936	0.987755	0.323273	0.467097
CG12325	210.167	0.140759	0.183283	0.767985	0.442496	0.58581
CG1233	472.628	-0.144205	0.148897	-0.968484	0.332803	0.476978
CG12333	475.466	0.0720041	0.230243	0.312732	0.754485	0.839783
CG12338	343.42	0.513246	0.172245	2.97974	0.00288496	0.0106427
CG1234	225.719	0.634978	0.1573	4.03672	5.4203e-05	0.000334961
CG12341	213.17	-0.384881	0.195804	-1.96565	0.049339	0.111351
CG12343	316.665	-0.0864999	0.171676	-0.503856	0.614363	0.734621
CG12344	184.161	-0.26276	0.242571	-1.08323	0.278707	0.420018
CG12355	1711.69	-0.413412	0.198963	-2.07783	0.037725	0.0891097
CG1236	181.094	0.568282	0.184527	3.07966	0.00207236	0.00804924
CG12360	1420.05	-0.408784	0.100487	-4.06802	4.7414e-05	0.000298565
CG12362	5.19726	0.811	0.948765	0.854796	0.392664	0.537465
CG12375	372.772	0.452391	0.140556	3.21859	0.00128822	0.0053017
CG12379	45.5299	0.309987	0.328479	0.943704	0.345321	0.490093
CG12384	653.277	0.176424	0.153415	1.14997	0.250155	0.387207
CG1239	88.0032	0.607394	0.243271	2.49677	0.0125329	0.0362572
CG12391	576.054	0.301312	0.217487	1.38542	0.165924	0.287117
CG12393	292.408	0.291884	0.240768	1.2123	0.225396	0.359463
CG12395	1.88373	1.7765	1.8795	0.945196	0.344559
CG12400	821.03	0.14877	0.128554	1.15726	0.247168	0.383982
CG12402	930.041	-0.449966	0.113455	-3.96602	7.30832e-05	0.000439119
CG12404	402.796	0.132201	0.148129	0.89247	0.372141	0.517374
CG12413	118.71	0.617076	0.283895	2.17361	0.0297348	0.0735441
CG12420	7.95248	-0.0502622	0.811027	-0.0619735	0.950584	0.97054
CG12426	7.20572	-6.49953	3.91384	-1.66065	0.0967833	0.189377
CG12428	258.511	0.0661874	0.176558	0.374877	0.707752	0.805836
CG1246	17.0508	3.20347	0.739735	4.33056	1.48727e-05	0.00010484
CG12470	13.1158	0.778085	0.766737	1.0148	0.310201	0.453207
CG12477	1.93504	-0.346071	1.66255	-0.208157	0.835106
CG12484	4524.09	-0.634307	0.165118	-3.84154	0.000122265	0.000686483
CG12493	5.9492	-1.45066	0.946645	-1.53242	0.125418	0.231627
CG12499	286.525	0.166173	0.179619	0.925143	0.354891	0.500201
CG12502	2586.62	-0.620798	0.123849	-5.01255	5.37121e-07	5.2979e-06
CG12512	476.184	0.895302	0.150167	5.96205	2.491e-09	3.99727e-08
CG12531	7752.31	-0.684129	0.145449	-4.70356	2.55663e-06	2.17272e-05
CG12535	1.96523	-1.81768	1.67148	-1.08747	0.276828
CG12539	4.59553	-1.13427	1.08925	-1.04133	0.297721	0.440487
CG12541	623.435	-0.971261	0.123684	-7.85278	4.06926e-15	1.47033e-13
CG12547	1564.75	0.140555	0.182633	0.769606	0.441534	0.584839
CG12560	119.349	-0.246314	0.21653	-1.13755	0.255309	0.392678
CG12567	1365.72	-0.330276	0.130426	-2.53228	0.0113323	0.0334303
CG12576	1417.74	-0.345428	0.119841	-2.88239	0.00394671	0.0139217
CG12581	115.578	-0.579845	0.29926	-1.93759	0.0526727	0.117231
CG12582	640.993	0.363621	0.154559	2.35263	0.018641	0.0501578
CG12590	19.8866	-1.43447	0.618563	-2.31904	0.020393	0.0540372
CG12592	9.76389	0.763165	0.743477	1.02648	0.304665	0.44721
CG12594	1376.22	-0.347896	0.135679	-2.5641	0.0103443	0.031033
CG12605	8466.01	-0.606312	0.137507	-4.4093	1.03705e-05	7.61868e-05
CG12608	242.394	-0.309486	0.163329	-1.89487	0.0581099	0.126965
CG12640	3.85427	-0.953409	1.17856	-0.808963	0.418537	0.56223
CG12643	77.7899	-0.212086	0.279493	-0.758826	0.447957	0.589754
CG1265	292.601	-0.360709	0.176201	-2.04714	0.0406441	0.095039
CG12655	9.22023	0.000126071	0.754347	0.000167126	0.999867	0.999892
CG12659	41.7246	-0.204601	0.350191	-0.584256	0.559048	0.687437
CG12672	66.4597	-0.57899	0.320168	-1.80839	0.0705452	0.147718
CG12681	45.8128	-1.35678	0.524602	-2.5863	0.00970118	0.0294529
CG12688	1.56946	0.257599	1.69903	0.151615	0.87949
CG12693	1.69513	-0.404431	1.55071	-0.260805	0.794243
CG12698	10.0629	2.85229	1.01876	2.79977	0.00511397	0.0172408
CG12699	8.09184	-0.806471	1.78586	-0.451586	0.651567	0.764395
CG12702	5.83503	0.996652	1.02268	0.974549	0.329784	0.473931
CG1271	221.161	0.199211	0.252388	0.789306	0.429933	0.573839
CG12713	42.2496	0.16159	0.345618	0.46754	0.640114	0.754411
CG12716	70.0617	0.425759	0.313364	1.35867	0.174251	0.297886
CG12717	421.772	-0.150139	0.150349	-0.998605	0.317986	0.460904
CG12723	3.13959	0.64009	1.29787	0.493183	0.621883	0.739961
CG12728	226.72	-0.292696	0.207291	-1.41201	0.157948	0.276558
CG12730	619.462	-0.0707534	0.111043	-0.637169	0.524015	0.657914
CG12736	309.917	0.0250083	0.199138	0.125583	0.900062	0.938216
CG12744	14.6041	0.42792	0.620673	0.689445	0.490543	0.629961
CG12746	400.753	-0.328948	0.156912	-2.09638	0.0360485	0.0860547
CG1275	2947.93	-0.311679	0.111415	-2.79746	0.00515067	0.0173535
CG12766	12.636	1.52217	0.677129	2.24797	0.0245781	0.063005
CG12768	488.108	-0.202526	0.140346	-1.44305	0.149006	0.264782
CG12769	1615.66	-1.08406	0.13777	-7.86867	3.58438e-15	1.313e-13
CG12772	520.693	-0.0163502	0.156243	-0.104646	0.916657	0.948903
CG12773	498.951	-0.134757	0.12848	-1.04886	0.294244	0.436801
CG12783	5.45454	0.31417	0.893879	0.351468	0.725237	0.819146
CG12795	174.448	-0.20624	0.25765	-0.800465	0.423442	0.567313
CG12811	91.5964	1.15257	0.25368	4.54339	5.53577e-06	4.38527e-05
CG12814	126.377	-0.938857	0.241238	-3.89183	9.94899e-05	0.000570362
CG12817	238.081	-0.194396	0.187546	-1.03652	0.299959	0.442118
CG12818	83.0947	0.0480466	0.25411	0.189078	0.850032	0.905888
CG12822	696.416	0.238405	0.221163	1.07796	0.281051	0.422887
CG12824	2.03675	0.772374	1.66764	0.463154	0.643254
CG12825	21.824	-0.194972	0.503239	-0.387433	0.698435	0.798613
CG12836	8.98673	-0.381122	0.707056	-0.539026	0.589869	0.713932
CG12848	132.058	0.472137	0.245389	1.92404	0.0543499	0.120258
CG12851	2085.58	-0.709787	0.171278	-4.14407	3.41192e-05	0.000222088
CG12853	1.96285	-0.755172	1.66621	-0.453228	0.650385
CG12857	15.1172	-0.13822	0.611831	-0.225913	0.821269	0.887551
CG12858	10365.9	-1.12267	0.11238	-9.98993	1.68706e-23	1.82874e-21
CG12859	526.846	0.00886629	0.153764	0.0576615	0.954018	0.971951
CG12860	6.42415	-0.103399	1.77122	-0.0583772	0.953448	0.971806
CG12861	6.292	-0.59426	1.78636	-0.332665	0.739387	0.82836
CG12863	87.0613	0.37397	0.240355	1.55591	0.11973	0.22361
CG12868	128.764	0.124209	0.265757	0.467379	0.640228	0.754426
CG12869	15.8334	0.566218	0.562427	1.00674	0.31406	0.456959
CG1287	7.12292	-1.03415	1.0144	-1.01947	0.307979	0.450641
CG12877	253.763	0.332695	0.192061	1.73224	0.0832313	0.168452
CG1288	2.62882	-1.78621	2.34566	-0.761496	0.446361	0.588884
CG12880	19.9847	-0.18181	0.474142	-0.383451	0.701385	0.800732
CG12883	47.9723	0.694998	0.313355	2.21793	0.0265599	0.0670817
CG12885	6.39191	0.897452	0.919411	0.976116	0.329007	0.473455
CG12895	247.542	0.075	0.185029	0.405343	0.685226	0.789239
CG12896	45.2334	0.610393	0.377123	1.61855	0.105544	0.202381
CG12898	2.02157	-1.84479	2.14612	-0.859592	0.390014
CG12907	3.52993	-0.723516	1.85351	-0.390349	0.696278	0.797043
CG12909	38.4556	1.03027	0.390109	2.64099	0.00826645	0.0257521
CG1291	189.511	-0.0834652	0.177322	-0.470698	0.637857	0.75347
CG12910	57.9985	0.245418	0.301693	0.813469	0.415949	0.559674
CG12913	571.281	-0.723285	0.140777	-5.13781	2.77955e-07	2.92638e-06
CG12923	7.22665	0.226701	0.831513	0.272637	0.785132	0.862687
CG12926	741.628	0.345444	0.145898	2.3677	0.017899	0.0485178
CG12929	50.3967	0.396434	0.314992	1.25855	0.208192	0.339414
CG12935	119.423	0.273272	0.253112	1.07965	0.280299	0.422178
CG12942	125.166	0.746176	0.207676	3.59297	0.000326925	0.0016259
CG12945	407.778	-0.499451	0.216691	-2.3049	0.0211724	0.0557409
CG12947	131.886	1.15464	0.314826	3.66755	0.000244885	0.00126221
CG12948	147.177	0.172484	0.231616	0.744701	0.456452	0.598626
CG12950	3031.41	-0.427885	0.136771	-3.12849	0.00175709	0.0069492
CG12964	22.3429	-1.06117	0.468349	-2.26577	0.0234656	0.0606509
CG12970	2.15167	-1.96656	1.97117	-0.997662	0.318443
CG12974	2.74046	1.90833	1.45576	1.31089	0.189897	0.317831
CG12975	357.889	0.520417	0.177729	2.92815	0.00340989	0.0123026
CG12983	2.16197	0.68128	1.69304	0.402401	0.687389
CG12985	3.44299	-0.977282	1.10191	-0.886901	0.375132	0.520171
CG1299	71.5081	-0.239528	0.323194	-0.741129	0.458615	0.600206
CG12991	1437.04	-0.623781	0.133834	-4.66085	3.14905e-06	2.63197e-05
CG12992	15.7787	-1.59184	0.910007	-1.74926	0.0802459	0.163587
CG12994	413.859	-1.08136	0.242236	-4.46407	8.04158e-06	6.1237e-05
CG12998	2.10415	-4.70792	2.185	-2.15466	0.0311886
CG13001	352.783	0.0606567	0.192849	0.31453	0.753119	0.838702
CG13003	21.5549	-0.685975	0.583904	-1.17481	0.240072	0.375981
CG13004	178.382	-0.162058	0.23929	-0.677246	0.49825	0.636933
CG13005	83.4417	0.276646	0.248487	1.11332	0.26557	0.404756
CG13008	42.1473	-0.304514	0.399702	-0.761853	0.446148	0.588676
CG13012	62.1725	0.0854861	0.36934	0.231456	0.81696	0.885117
CG13014	47.2372	0.653266	0.346969	1.88278	0.0597304	0.129716
CG13016	123	-0.302218	0.22875	-1.32117	0.186444	0.313535
CG13018	68.1512	0.256727	0.285748	0.898439	0.368952	0.514016
CG13024	17.6267	0.15546	0.743516	0.209088	0.834379	0.895676
CG13025	247.861	0.054653	0.166505	0.328237	0.742733	0.830707
CG13026	10.8731	3.7046	1.02846	3.60208	0.000315684	0.0015766
CG13029	1.67169	2.82439	1.94695	1.45067	0.146871
CG13032	2.96314	0.244386	1.29192	0.189165	0.849964	0.905888
CG13043	8.10885	-5.671	1.60894	-3.52468	0.000424002	0.00203165
CG13044	4.2652	-5.73504	2.45451	-2.33653	0.0194637	0.0520028
CG13054	62.8763	0.588638	0.339086	1.73595	0.0825719	0.167429
CG13055	273.359	-0.511154	0.191611	-2.66767	0.00763784	0.0242272
CG13056	9.47738	-1.2891	0.923708	-1.39557	0.162844	0.283032
CG13067	264.37	-2.08166	0.338228	-6.15461	7.52647e-10	1.32155e-08
CG13068	9.13938	-1.01771	0.800643	-1.27112	0.203686	0.334223
CG1307	237.469	0.612988	0.240348	2.55042	0.0107593	0.0320697
CG13071	2.31684	-1.16511	1.62558	-0.716735	0.473537
CG13077	11.6259	1.80053	0.751891	2.39467	0.0166355	0.0458533
CG13082	144.986	-1.2906	0.513022	-2.51567	0.0118805	0.0347171
CG13085	8.8525	0.854206	0.82404	1.03661	0.299919	0.442118
CG13086	26.8215	2.53451	0.512029	4.94993	7.42396e-07	7.07608e-06
CG13088	47.6902	0.444994	0.314838	1.41341	0.157537	0.276106
CG1309	640.055	0.0230669	0.133609	0.172645	0.86293	0.914314
CG13090	137.544	0.171678	0.205137	0.836893	0.402653	0.546839
CG13096	164.898	0.41223	0.18328	2.24918	0.0245009	0.0628376
CG13097	176.384	0.509539	0.20329	2.50646	0.0121945	0.0354619
CG13101	8.23007	1.80478	1.02985	1.75248	0.0796914	0.16256
CG13108	376.366	-0.247844	0.18779	-1.31979	0.186904	0.314059
CG1311	620.487	-0.0485377	0.129319	-0.375333	0.707413	0.805622
CG13116	39.0578	-0.883432	0.42985	-2.05521	0.0398588	0.0934497
CG13117	47.3221	-0.842685	0.447714	-1.88219	0.0598098	0.129848
CG13123	67.2965	-0.0228356	0.266616	-0.0856496	0.931745	0.958805
CG13124	1738.79	-0.0329397	0.0955939	-0.34458	0.73041	0.822467
CG13126	157.323	0.341432	0.225207	1.51608	0.1295	0.237186
CG13133	6.13168	0.577421	1.24915	0.462251	0.643901	0.757745
CG13135	3.68255	-5.52261	2.35577	-2.34429	0.0190632	0.0511127
CG13138	1.7675	-0.0999787	1.50984	-0.0662179	0.947204
CG1314	5.55965	-0.947945	1.37602	-0.688905	0.490883	0.630169
CG13142	221.266	-0.372258	0.16114	-2.31015	0.0208799	0.0551758
CG13148	181.626	0.0314995	0.233043	0.135166	0.892481	0.933887
CG1315	42.179	3.42118	0.476819	7.175	7.23048e-13	2.00024e-11
CG13151	99.2444	0.217457	0.312934	0.694898	0.487119	0.627004
CG1316	2167.61	0.0990124	0.142286	0.695871	0.48651	0.626372
CG13163	140.884	0.0494619	0.210166	0.235346	0.81394	0.882845
CG13168	31.6839	-0.0560891	0.395463	-0.141831	0.887213	0.931219
CG1317	3320.7	-0.32787	0.100012	-3.27832	0.00104426	0.00442488
CG13177	2.37346	1.76308	1.56721	1.12498	0.260595	0.399064
CG13178	6.13266	-0.746355	0.882026	-0.846183	0.39745	0.541575
CG13183	3.2105	-4.28887	2.02535	-2.1176	0.0342089	0.0826476
CG13185	487.194	0.136717	0.328941	0.415629	0.677682	0.783182
CG13188	20.8788	-2.47443	0.581321	-4.25657	2.07586e-05	0.000141813
CG1319	262.036	0.37215	0.178925	2.07992	0.0375333	0.0888009
CG13192	140.776	0.256634	0.224692	1.14216	0.253388	0.390787
CG13197	511.577	-0.185101	0.144931	-1.27717	0.201542	0.33188
CG13203	55.8435	-0.190316	0.3537	-0.538073	0.590526	0.714402
CG13204	524.032	-0.290698	0.177308	-1.63951	0.101107	0.195675
CG13215	3.92497	-5.6316	2.44772	-2.30075	0.0214055	0.0561458
CG13220	407.062	0.206555	0.161992	1.27509	0.202276	0.332392
CG13229	223.285	-0.401622	0.166055	-2.41861	0.0155799	0.0435071
CG13248	2379.27	-0.449928	0.107894	-4.1701	3.04462e-05	0.000201013
CG13252	395.235	0.558632	0.140725	3.96966	7.19745e-05	0.000433193
CG13255	261.086	-0.0977284	0.229153	-0.426477	0.669761	0.777241
CG13258	4.12838	0.281529	1.18219	0.238142	0.811771	0.881923
CG13282	1.91074	0.618795	1.44059	0.429543	0.667528
CG13283	58.9347	2.71033	0.547318	4.95203	7.34445e-07	7.00989e-06
CG13284	127.043	-0.685839	0.312216	-2.19668	0.028043	0.0701312
CG13285	9.87411	1.63759	1.40821	1.16289	0.244875	0.381535
CG13287	30.335	0.0323417	0.421111	0.0768009	0.938782	0.962986
CG13288	43.7548	-0.780153	0.339917	-2.29513	0.0217256	0.0568172
CG13293	1297.94	-0.326599	0.113829	-2.8692	0.00411511	0.0144226
CG13295	296.614	-0.0939492	0.146383	-0.641804	0.521001	0.655912
CG13298	440.699	0.427981	0.14233	3.00695	0.00263881	0.00987045
CG13300	489.266	-0.542598	0.149338	-3.63335	0.000279761	0.00141722
CG13314	10.1604	-0.920427	0.836803	-1.09993	0.271361	0.411634
CG13315	598.626	0.725334	0.388804	1.86555	0.0621044	0.133577
CG13318	9.76065	1.69033	1.56821	1.07788	0.281089	0.422887
CG13319	72.3426	0.535895	0.265892	2.01546	0.0438562	0.101191
CG13322	360.861	-0.472734	0.136017	-3.47556	0.000509796	0.00238571
CG13325	195.871	-0.958996	0.195824	-4.89722	9.72004e-07	8.99443e-06
CG13330	39.3474	-1.0928	0.383147	-2.85217	0.00434225	0.0150449
CG13332	3.86013	-0.0518985	1.32062	-0.0392987	0.968652	0.98077
CG13334	3.05915	2.12394	1.46985	1.44501	0.148456	0.264247
CG13337	23.7359	-0.486468	0.700936	-0.694026	0.487666	0.627404
CG13339	157.459	0.0131158	0.201142	0.0652066	0.94801	0.968774
CG13344	749.679	-0.0748006	0.205114	-0.364677	0.715352	0.812226
CG13360	302.581	1.95306	0.319208	6.11847	9.44807e-10	1.61361e-08
CG13364	279.561	0.43102	0.226518	1.90281	0.0570657	0.12525
CG13365	206.539	-0.12637	0.236429	-0.534494	0.593	0.716415
CG13366	946.094	-0.203113	0.113927	-1.78283	0.0746138	0.154357
CG13367	195.123	0.340431	0.309802	1.09887	0.271827	0.412131
CG13369	395.811	0.613532	0.179386	3.42018	0.000625798	0.00284218
CG13373	15.5265	0.098984	0.627918	0.157639	0.874742	0.923054
CG13375	2587.25	-0.878258	0.175125	-5.01504	5.30211e-07	5.2346e-06
CG13376	9.89125	0.0873558	0.759004	0.115093	0.908372	0.944283
CG13377	16.4648	-0.777704	0.517356	-1.50323	0.13278	0.241539
CG13384	1890.73	-0.203316	0.0823933	-2.46763	0.013601	0.0388918
CG13390	113.977	0.599661	0.244475	2.45285	0.014173	0.0401708
CG13392	85.4188	0.140375	0.298512	0.470249	0.638177	0.753577
CG13397	396.657	-0.228413	0.218748	-1.04418	0.2964	0.439021
CG13398	524.04	-0.279004	0.134249	-2.07826	0.0376855	0.0890817
CG13404	668.503	-0.541578	0.120578	-4.49153	7.07138e-06	5.45529e-05
CG13407	2.82389	-0.87013	1.26685	-0.686846	0.49218	0.631224
CG13408	287.405	-0.247264	0.161836	-1.52787	0.126545	0.233099
CG13409	964.409	-0.410919	0.102484	-4.0096	6.08219e-05	0.000372183
CG13422	43.7511	4.00704	0.594369	6.74167	1.56574e-11	3.68799e-10
CG13436	24.1902	0.254024	0.500915	0.50712	0.612071	0.732777
CG1344	688.975	0.107226	0.149522	0.717127	0.473296	0.613598
CG13442	2.38823	-0.380616	2.28384	-0.166656	0.867641	0.917931
CG13449	1.59757	1.44609	1.97121	0.733602	0.463192
CG13455	14.5124	0.883497	0.653811	1.3513	0.176598	0.300938
CG13458	163.559	0.42541	0.191555	2.22082	0.0263629	0.0666635
CG13482	15.1866	-4.32363	0.981232	-4.40633	1.05138e-05	7.71857e-05
CG13484	81.0426	0.0530219	0.252482	0.210003	0.833665	0.895676
CG13488	9.64366	4.00096	1.07703	3.71482	0.000203349	0.00106993
CG13500	15.3119	-0.327712	0.592499	-0.5531	0.580195	0.705518
CG13502	17.6223	0.118084	0.527928	0.223673	0.823011	0.888682
CG13506	1953.1	-0.353012	0.113718	-3.10428	0.00190744	0.00748808
CG13516	6.87368	1.18428	0.815682	1.45189	0.146533	0.261442
CG13531	418.709	0.241945	0.149193	1.62169	0.10487	0.201416
CG13532	583.08	-0.128337	0.117634	-1.09098	0.27528	0.416152
CG1354	758.693	0.75521	0.146216	5.16503	2.404e-07	2.56145e-06
CG13551	703.701	0.82171	0.1907	4.30891	1.64063e-05	0.000114284
CG13559	9.8626	1.44492	0.810936	1.7818	0.0747825	0.154615
CG13562	5.44243	1.48564	1.09283	1.35945	0.174004	0.297657
CG13563	3.07252	0.348257	1.24351	0.280061	0.779431	0.85891
CG13565	1337.45	1.05992	0.168275	6.29873	3.00093e-10	5.70285e-09
CG13575	3.5425	-0.287009	1.08894	-0.263568	0.792113	0.868202
CG13578	7.91612	0.0264301	0.785794	0.033635	0.973168	0.984006
CG13579	667.453	-0.563851	0.140245	-4.02047	5.80816e-05	0.000357061
CG1358	5040.11	-0.745329	0.11592	-6.42971	1.27846e-10	2.55473e-09
CG13585	882.236	-0.222978	0.14467	-1.54129	0.123247	0.228647
CG13594	1162.49	0.0856733	0.14972	0.572224	0.567171	0.69413
CG13599	6.88082	0.389433	0.827865	0.470406	0.638065	0.753566
CG1360	67.5489	0.51298	0.270699	1.89502	0.0580892	0.12695
CG13601	221.119	0.296245	0.194046	1.52668	0.126841	0.233564
CG13603	803.243	-0.52758	0.160752	-3.28194	0.00103095	0.00437607
CG13604	614.739	0.0245419	0.124468	0.197175	0.843691	0.902571
CG13605	354.86	0.11322	0.146202	0.774411	0.438688	0.582377
CG13606	234.625	-3.96992	1.09599	-3.62222	0.000292086	0.00147333
CG13607	216.444	2.82308	0.516635	5.46436	4.64585e-08	5.80622e-07
CG13609	85.3714	-0.0513364	0.253214	-0.202739	0.839339	0.899092
CG13611	2.62878	1.31623	1.29665	1.0151	0.310057	0.453058
CG13616	3.23396	-0.0729955	1.22535	-0.059571	0.952497	0.971427
CG13617	3.19036	0.217635	1.25596	0.173281	0.86243	0.914314
CG13618	89.4582	-0.620565	1.32188	-0.469456	0.638744	0.753667
CG13623	213.808	-0.484273	0.21449	-2.25779	0.023959	0.0616411
CG13624	2635.41	-0.779188	0.171256	-4.54985	5.36833e-06	4.26535e-05
CG13625	254.988	0.330008	0.28779	1.1467	0.251506	0.388731
CG13627	7.91463	1.32228	0.835675	1.58229	0.113584	0.214616
CG13630	213.176	0.30913	0.175843	1.75799	0.0787496	0.161093
CG13631	1856.63	-0.113608	0.185968	-0.610901	0.541265	0.672655
CG13640	9.15433	-4.95325	1.25941	-3.93298	8.38977e-05	0.000493491
CG13641	17.2475	0.882889	0.59199	1.49139	0.135859	0.245907
CG13643	4.87123	2.38008	1.20049	1.98259	0.0474129	0.107713
CG13646	2.64182	1.74913	1.47587	1.18515	0.235958	0.37129
CG13650	2519.59	-0.67962	0.107237	-6.33753	2.33473e-10	4.51764e-09
CG13654	710.928	-0.443936	0.109293	-4.06187	4.86811e-05	0.000305404
CG13658	3.62052	0.353816	1.14618	0.308692	0.757556	0.842092
CG13659	138.012	1.31888	0.249344	5.2894	1.22716e-07	1.40931e-06
CG13663	114.024	0.269813	0.234405	1.15106	0.249709	0.386741
CG13667	102.684	0.41046	0.274473	1.49545	0.134798	0.244361
CG13671	258.55	0.267784	0.15023	1.7825	0.0746681	0.154439
CG13676	11.1118	-1.90972	0.816702	-2.33833	0.0193701	0.0518048
CG13678	2.56706	0.697671	1.44891	0.481514	0.630151	0.746443
CG13679	11.3971	0.75666	0.670324	1.1288	0.258984	0.397053
CG13685	2841.6	-0.986715	0.113419	-8.69975	3.32606e-18	1.79354e-16
CG13689	49.2777	0.227987	0.406039	0.56149	0.574463	0.700554
CG13690	8.76997	2.22162	0.935244	2.37545	0.0175276	0.0477181
CG13694	2.47229	3.49284	1.75677	1.98822	0.0467874	0.106543
CG13698	341.394	-0.725274	0.156816	-4.62499	3.74623e-06	3.07544e-05
CG13700	7.95276	0.334303	0.750685	0.445331	0.656081	0.767825
CG13704	28.1243	4.30593	0.770843	5.586	2.32359e-08	3.10094e-07
CG13707	472.403	0.177529	0.150665	1.1783	0.238677	0.374244
CG13708	16.0926	0.411831	0.619894	0.664358	0.506461	0.643865
CG1371	1127.51	-0.17659	0.100981	-1.74874	0.0803358	0.163739
CG13716	5.58008	0.64747	1.00629	0.643424	0.519949	0.655148
CG13722	45.9065	-3.10044	0.858217	-3.61265	0.000303085	0.00152159
CG13737	13.3944	0.49799	0.640656	0.777313	0.436974	0.580811
CG13739	1756.68	-0.552943	0.158619	-3.48597	0.000490348	0.00230383
CG13741	5.30754	3.12773	1.25225	2.49768	0.0125009	0.0361845
CG13742	4.82881	3.58768	1.41392	2.53741	0.0111677	0.0330459
CG13743	3242.18	-0.843558	0.116715	-7.22749	4.91993e-13	1.37901e-11
CG13748	6.14914	-3.28073	1.15368	-2.84372	0.00445898	0.0153692
CG13749	1.96285	-0.755172	1.66621	-0.453228	0.650385
CG13751	145.972	0.128434	0.20953	0.612963	0.539901	0.671196
CG13759	162.368	-0.485389	0.210686	-2.30385	0.0212309	0.0558258
CG13760	698.968	-0.00890644	0.143828	-0.0619243	0.950623	0.97054
CG13766	225.163	0.00834445	0.17005	0.0490706	0.960863	0.975463
CG13773	62.1669	0.703213	0.276639	2.54199	0.0110224	0.0327161
CG13775	113.379	-0.0987328	0.212877	-0.463802	0.642789	0.756688
CG13784	2189.59	-0.527231	0.0888534	-5.93372	2.96153e-09	4.67311e-08
CG13793	1.95665	2.02655	1.73511	1.16797	0.242821
CG13794	53.751	2.3796	0.489276	4.86351	1.15321e-06	1.05245e-05
CG13795	133.634	1.74617	0.342194	5.10288	3.34531e-07	3.44011e-06
CG13796	174.662	-1.82013	0.273253	-6.66097	2.72023e-11	6.12226e-10
CG13807	89.951	0.609732	0.350769	1.73827	0.0821626	0.166758
CG13822	432.762	-1.01872	0.178624	-5.70316	1.17605e-08	1.65692e-07
CG13827	75.7283	-0.117021	0.263475	-0.444147	0.656937	0.768234
CG13830	14892.3	-0.715961	0.105301	-6.79918	1.05213e-11	2.51163e-10
CG13833	23.0205	3.27369	0.75346	4.34488	1.39353e-05	9.91528e-05
CG13840	1.93028	1.4033	1.7199	0.815917	0.414547
CG13841	3.38733	0.116865	1.20829	0.0967194	0.922949	0.95328
CG13842	1.72496	1.01702	1.5267	0.666157	0.505311
CG13843	1.84684	-2.40863	1.71537	-1.40415	0.160276
CG13850	457.893	-0.0520281	0.129905	-0.400509	0.688782	0.791594
CG13856	5.85711	-1.10144	0.955234	-1.15306	0.248886	0.385749
CG13865	781.74	-0.123697	0.105805	-1.1691	0.242365	0.378512
CG13868	6961.37	-0.421927	0.14901	-2.83154	0.00463243	0.0158634
CG13869	2.52267	-0.219355	1.3054	-0.168037	0.866555	0.916991
CG1387	4.09365	0.634737	1.27485	0.497891	0.618561	0.737497
CG13870	33.352	0.966187	0.508265	1.90095	0.0573087	0.125723
CG13872	2.82032	0.756224	1.50378	0.502882	0.615047	0.734879
CG13875	5.6427	-1.37174	0.964382	-1.4224	0.15491	0.272722
CG13876	114.745	0.100847	0.235272	0.428637	0.668187	0.776301
CG13877	134.491	-0.0144184	0.222175	-0.0648965	0.948256	0.968869
CG13887	741.454	0.280287	0.125468	2.23394	0.0254871	0.0647571
CG13889	57.1139	0.716315	0.326985	2.19067	0.0284758	0.0709259
CG13890	251.66	0.419457	0.186263	2.25195	0.0243252	0.0624171
CG13891	2.5062	-0.206441	1.91664	-0.10771	0.914226	0.947217
CG13893	628.134	-0.635114	0.132323	-4.79973	1.58883e-06	1.41358e-05
CG13894	154.624	-0.37723	0.191257	-1.97237	0.048567	0.109936
CG13895	458.041	0.473452	0.139201	3.40121	0.000670893	0.00301604
CG13896	50.1683	-0.0457464	0.323292	-0.141502	0.887473	0.931324
CG13898	6.29962	-1.92047	1.35878	-1.41338	0.157545	0.276106
CG13900	385.166	0.409052	0.1789	2.28649	0.0222258	0.0579255
CG13901	120.06	0.545057	0.288521	1.88914	0.0588731	0.12821
CG13902	116.787	0.137724	0.235852	0.583943	0.559259	0.687616
CG13907	1802.06	-0.7394	0.0916312	-8.06931	7.06956e-16	2.83396e-14
CG13912	55.8824	2.80766	0.456527	6.15003	7.74676e-10	1.35798e-08
CG13917	9844.05	-0.279141	0.1612	-1.73165	0.0833358	0.168592
CG13919	42.3262	-0.0349608	0.386281	-0.0905061	0.927885	0.956611
CG13920	1018.65	-0.205041	0.105806	-1.9379	0.0526351	0.117172
CG13921	1173.52	-0.284729	0.143677	-1.98173	0.0475099	0.10791
CG13924	30.7307	-0.0407756	0.486064	-0.0838895	0.933144	0.959333
CG13926	86.0964	0.056024	0.243553	0.230028	0.81807	0.885528
CG13928	8647.39	-0.253336	0.0979763	-2.58569	0.00971852	0.0294887
CG13933	1067.19	-0.270764	0.124796	-2.16965	0.0300337	0.0741626
CG13936	66.8812	0.261043	0.63102	0.413684	0.679106	0.784237
CG13937	1630.59	0.119936	0.118702	1.0104	0.312306	0.455343
CG1394	3.86006	-1.44912	1.80514	-0.802773	0.422106	0.56588
CG13947	155.536	-7.73697	3.22967	-2.39559
CG13950	9.90703	1.75299	0.77694	2.25628	0.0240531	0.0618683
CG13954	681.79	-0.683042	0.165531	-4.12638	3.68521e-05	0.000238417
CG13957	245.962	-0.124079	0.172449	-0.71951	0.471827	0.612189
CG13962	6.32907	-3.29682	1.40913	-2.33961	0.019304	0.051667
CG13965	6.18122	3.91537	1.29152	3.0316	0.00243265	0.00920956
CG13970	2.88	-0.0191604	1.19194	-0.0160749	0.987175	0.992406
CG13978	76.3381	1.51881	0.331894	4.57618	4.7355e-06	3.80236e-05
CG13982	247.055	-0.270476	0.157275	-1.71976	0.0854755	0.171955
CG13984	10.6535	-1.30476	0.993196	-1.3137	0.188948	0.316542
CG1399	2003.17	-0.327881	0.151053	-2.17063	0.0299589	0.0740296
CG13993	218.171	0.271556	0.177111	1.53325	0.125214	0.23129
CG13994	118.976	0.139199	0.239679	0.580773	0.561394	0.689204
CG13995	1941.56	-1.01558	0.122974	-8.25848	1.47543e-16	6.42356e-15
CG13996	5.06389	-1.13769	1.01457	-1.12134	0.262142	0.400854
CG13999	484.305	-0.810649	0.196357	-4.12845	3.65213e-05	0.000236632
CG14005	153.949	0.410977	0.232732	1.76588	0.077416	0.15907
CG14006	2.2418	3.30514	1.78943	1.84704	0.0647414
CG14010	740.405	-0.617057	0.129316	-4.77169	1.82684e-06	1.6012e-05
CG14015	737.838	-0.426051	0.147261	-2.89317	0.00381377	0.0135407
CG1402	949.43	-0.871555	0.112436	-7.75155	9.07769e-15	3.15138e-13
CG14022	9.23928	-0.548562	0.798134	-0.687306	0.49189	0.631004
CG14024	1278.1	-0.36889	0.140962	-2.61695	0.00887203	0.0272657
CG14040	171.482	0.0213813	0.217135	0.0984702	0.921559	0.952493
CG14043	527.072	-0.400676	0.185828	-2.15616	0.0310712	0.0762636
CG14044	49.5558	0.000765314	0.382629	0.00200015	0.998404	0.999062
CG14050	13.5709	0.7934	0.682635	1.16226	0.245129	0.381764
CG14052	2.79406	0.646787	1.29858	0.498072	0.618433	0.737496
CG14054	1.87818	1.19486	1.5015	0.795776	0.426162
CG14057	44.3015	0.54037	0.331444	1.63035	0.103028	0.198596
CG1407	469.977	-0.0641437	0.150163	-0.427159	0.669263	0.777089
CG14073	1323.9	-0.341939	0.188982	-1.80938	0.0703927	0.14755
CG14074	101.354	0.0070371	0.230143	0.0305771	0.975607	0.985253
CG14075	764.755	1.35795	0.580601	2.33886	0.0193426	0.0517442
CG14079	3.03408	0.709791	1.21087	0.586181	0.557754	0.686241
CG14082	1096.66	-0.482888	0.113395	-4.25847	2.05832e-05	0.000140705
CG14086	33.7046	0.541437	0.405255	1.33604	0.181536	0.307309
CG14100	213.712	0.526617	0.183995	2.86213	0.00420809	0.0147144
CG14102	145.282	0.027985	0.207932	0.134587	0.892938	0.93409
CG14103	384.941	0.398978	0.132625	3.00832	0.00262699	0.0098401
CG14104	32.3502	0.261466	0.434283	0.602062	0.547133	0.67757
CG14105	7.61028	0.658656	0.836482	0.787412	0.431041	0.574883
CG14107	2.00561	-1.28733	1.51851	-0.847756	0.396574
CG14109	10.9855	-1.93923	0.806686	-2.40395	0.0162189	0.0449069
CG14113	2.37924	-2.13885	1.76773	-1.20994	0.226301	0.360473
CG14117	45.9444	0.156817	0.329705	0.475629	0.634339	0.750064
CG14118	20.4812	-2.89652	0.838847	-3.45297	0.000554444	0.00256862
CG14125	5.60966	4.73969	2.23338	2.1222	0.0338208	0.0818961
CG14130	89.3301	0.0680435	0.305292	0.22288	0.823629	0.889258
CG14131	3.83524	-0.251898	1.42441	-0.176844	0.859631	0.912365
CG14132	24.4705	-2.00555	0.576686	-3.47772	0.000505704	0.0023676
CG14135	210.869	-0.120509	0.198125	-0.608247	0.543024	0.67389
CG14137	3.50063	-1.61678	1.14192	-1.41584	0.156823	0.27527
CG14141	1954.24	0.886504	0.143255	6.18829	6.0821e-10	1.08044e-08
CG14142	114.078	-0.516206	0.221935	-2.32593	0.0200223	0.0531742
CG14153	121.604	-0.618862	0.289267	-2.13942	0.0324019	0.0789455
CG14154	3.02457	-0.358378	1.47896	-0.242318	0.808534	0.879616
CG1416	1105.5	0.3918	0.147139	2.66279	0.00774963	0.0245013
CG14174	31.5259	0.484283	0.40558	1.19405	0.232458	0.367748
CG1418	174.806	0.23532	0.193048	1.21897	0.222856	0.356859
CG14182	206.898	0.199281	0.178401	1.11704	0.263976	0.402641
CG14183	128.045	1.38941	0.246581	5.63471	1.75353e-08	2.38511e-07
CG14184	306.366	0.0471135	0.183139	0.257256	0.796981	0.872095
CG14185	3.45211	0.0162738	1.07619	0.0151216	0.987935	0.992419
CG14186	4539.28	-0.735365	0.192535	-3.81938	0.000133788	0.000742547
CG14194	428.068	-0.157514	0.134711	-1.16927	0.242294	0.378457
CG14196	249.986	-0.100697	0.215305	-0.467693	0.640004	0.754411
CG14200	1817.49	-0.183288	0.170714	-1.07365	0.282978	0.425113
CG14207	1235.46	-0.0299447	0.106362	-0.281535	0.7783	0.858109
CG14210	42.6702	1.1591	0.416996	2.77964	0.00544197	0.0182079
CG14212	4.28965	-0.382828	1.08615	-0.352464	0.72449	0.818838
CG14215	1222.9	0.42472	0.13165	3.22612	0.00125481	0.00519035
CG14220	218.135	-0.0376166	0.164575	-0.228568	0.819205	0.886373
CG14221	6.9539	1.58251	0.883286	1.79162	0.0731943	0.15237
CG14223	22.752	0.558459	0.511872	1.09101	0.275267	0.416152
CG14229	167.687	-0.0112038	0.200048	-0.0560057	0.955337	0.972806
CG14230	130.98	0.885516	0.227582	3.89098	9.98386e-05	0.000572052
CG14231	116.046	0.401657	0.228222	1.75994	0.0784178	0.160631
CG14232	410.461	0.0937314	0.219392	0.427232	0.669211	0.777089
CG14234	1815.54	-0.681145	0.129753	-5.24954	1.52476e-07	1.70679e-06
CG14238	2.65004	0.893723	1.252	0.713833	0.47533	0.615776
CG14245	2.0351	0.7718	1.47699	0.522547	0.601289
CG14246	2.3055	0.690978	1.43428	0.48176	0.629976
CG14247	3.81737	1.94445	1.27673	1.52299	0.12776	0.23485
CG14252	148.34	0.24124	0.198433	1.21572	0.22409	0.358134
CG14253	163.413	-0.255768	0.20574	-1.24316	0.213809	0.345759
CG14257	9.53627	-0.0107752	0.696176	-0.0154776	0.987651	0.992419
CG14258	2.11778	-0.129855	1.41333	-0.0918782	0.926795
CG14259	36.0139	0.426688	0.788619	0.541057	0.588468	0.712723
CG14260	2.01309	-1.27629	1.51918	-0.840116	0.400844
CG1427	711.335	-0.0649369	0.133208	-0.487486	0.625914	0.74313
CG14270	153.442	0.437641	0.19753	2.21557	0.0267207	0.0674078
CG14273	9.13452	-0.439961	0.734486	-0.599005	0.54917	0.679426
CG14274	1226.51	-0.310718	0.109765	-2.83076	0.00464371	0.0158771
CG14275	43.4081	0.942609	0.43182	2.18287	0.0290451	0.072107
CG14285	23.6572	0.924436	0.46309	1.99623	0.0459084	0.104877
CG14286	46.7832	0.534779	0.325465	1.64313	0.100357	0.194507
CG14291	193.414	-0.198851	0.207705	-0.957374	0.338379	0.482691
CG14292	1.56893	2.78384	2.54111	1.09552	0.273288
CG14297	2.34613	-1.58548	2.0191	-0.785242	0.432311
CG14298	8.07405	-0.529395	0.808962	-0.654413	0.512846	0.649417
CG14299	1189.48	-0.307747	0.14562	-2.11335	0.0345705	0.0832749
CG14301	150.343	-1.83761	0.228768	-8.03264	9.53976e-16	3.72577e-14
CG14302	1.90371	-1.73415	1.79734	-0.964843	0.334623
CG14304	3.45231	-2.85104	2.07418	-1.37454	0.169275	0.291349
CG14305	1.86757	-0.601239	2.3927	-0.25128	0.801597
CG14310	2.25629	-1.03885	1.76517	-0.588531	0.556176
CG14312	154.636	-0.236017	0.19807	-1.19159	0.233423	0.368831
CG14314	544.059	-0.172196	0.138481	-1.24346	0.213697	0.345719
CG14321	225.941	-0.272655	0.182983	-1.49006	0.136209	0.246457
CG14322	872.686	-0.179591	0.172642	-1.04025	0.298224	0.441045
CG14327	7.63734	0.895254	0.975454	0.917782	0.358733	0.503811
CG14331	60.8327	-0.232601	0.273449	-0.85062	0.394981	0.539386
CG1434	63.7847	0.806599	0.302808	2.66373	0.00772787	0.0244762
CG14340	197.292	-1.14577	0.175043	-6.54567	5.92311e-11	1.28149e-09
CG14341	148.376	0.355375	0.202085	1.75854	0.078656	0.160964
CG14342	2.29531	0.706733	1.49793	0.471805	0.637066
CG14352	63.1816	0.159627	0.290853	0.548825	0.583126	0.70811
CG14353	211.73	0.0435037	0.186779	0.232916	0.815827	0.88425
CG14354	3.85749	0.143329	1.12263	0.127672	0.898408	0.937252
CG14355	3.54649	1.58993	2.07849	0.764945	0.444304	0.587118
CG14356	10.2705	0.0388016	0.896702	0.0432714	0.965485	0.978473
CG14367	58.0751	-0.245817	0.366636	-0.670467	0.50256	0.640362
CG14372	3066.36	-0.479776	0.110859	-4.32778	1.50617e-05	0.00010589
CG14397	13.0943	1.66621	0.713915	2.33391	0.0196006	0.0522765
CG1440	1088.06	0.108662	0.139037	0.78153	0.434491	0.578106
CG14400	73.095	3.48641	0.447547	7.79006	6.6978e-15	2.35598e-13
CG14401	50.4902	0.143128	0.343438	0.416751	0.676861	0.782659
CG14402	1.6402	0.76324	1.76542	0.432329	0.665502
CG14407	379.761	-0.128629	0.166228	-0.773809	0.439044	0.582558
CG14408	3514.3	-0.118017	0.127959	-0.922296	0.356374	0.501558
CG1441	10.1893	0.864572	0.814523	1.06145	0.288487	0.430542
CG14410	8.48026	-1.30089	0.898915	-1.44718	0.147846	0.263466
CG14411	910.681	0.0798926	0.130136	0.613917	0.53927	0.670647
CG14414	289.235	0.596917	0.243902	2.44736	0.0143907	0.0407008
CG14417	1.93636	0.10394	1.47252	0.0705862	0.943727
CG14419	1.66844	-0.380171	1.79679	-0.211584	0.832432
CG14431	1210.73	-0.699045	0.1298	-5.38555	7.22237e-08	8.68892e-07
CG14434	135.191	-0.481669	0.285669	-1.68611	0.0917752	0.181585
CG14435	1500.29	0.0122543	0.0926954	0.132199	0.894827	0.934913
CG14438	2473.6	-0.797241	0.22177	-3.5949	0.00032452	0.0016147
CG14439	96.3818	0.734638	0.331426	2.2166	0.0266507	0.0672631
CG1444	2135.52	0.161162	0.0954871	1.68779	0.0914514	0.181045
CG14440	1203.44	-0.126677	0.109508	-1.15679	0.247359	0.384166
CG14441	1582.4	-0.495103	0.173152	-2.85935	0.00424504	0.0148047
CG14442	1601.54	-0.143076	0.174007	-0.822247	0.410936	0.554968
CG14443	10.9185	-3.53732	1.43942	-2.45747	0.0139919	0.0397798
CG14445	8.81338	0.637145	0.757847	0.840731	0.400499	0.544388
CG14446	10742.3	-0.517779	0.15027	-3.44565	0.00056968	0.00263118
CG14448	3.90519	-1.21604	1.27932	-0.950539	0.341838	0.486125
CG14450	251.227	-0.0570198	0.170751	-0.333935	0.738428	0.827759
CG14451	2.37738	0.558164	1.64223	0.339883	0.733945	0.824786
CG14457	13.9584	0.443669	0.609986	0.727342	0.467016	0.607607
CG14459	384.035	-1.91521	0.673296	-2.84453	0.00444773	0.0153453
CG14463	142.017	0.386206	0.216707	1.78216	0.0747239	0.154524
CG14464	1129.94	-0.217977	0.163069	-1.33672	0.181313	0.307045
CG14476	6219.76	-0.121918	0.126396	-0.964577	0.334757	0.478745
CG14478	1874.51	-0.346374	0.104198	-3.32418	0.000886787	0.00384504
CG14480	350.216	0.358601	0.248225	1.44466	0.148553	0.264247
CG14482	768.647	-0.181924	0.174759	-1.041	0.297877	0.440655
CG14483	401.863	0.00758033	0.162608	0.0466173	0.962818	0.976888
CG14490	4.65463	2.01384	1.08416	1.85751	0.0632392	0.135551
CG14495	3.43325	-0.435801	1.42268	-0.306324	0.759358	0.843264
CG14502	11.3162	2.46716	0.792855	3.11174	0.00185987	0.00732028
CG14505	23.7141	-1.6693	0.704447	-2.36966	0.0178045	0.0482986
CG14508	5.67857	0.644858	0.951759	0.677544	0.498061	0.636806
CG14509	9707.03	-0.650434	0.070917	-9.17177	4.65313e-20	3.18905e-18
CG14511	20.6875	0.627753	0.616368	1.01847	0.308455	0.451276
CG14512	59.125	0.0913603	0.363991	0.250996	0.801817	0.874866
CG14516	167.467	-0.747695	0.195586	-3.82284	0.000131924	0.000734502
CG14521	1244.89	-0.402771	0.111377	-3.61628	0.000298872	0.00150399
CG14523	62.0437	1.58694	0.366063	4.33516	1.45653e-05	0.000103083
CG14526	295.929	2.75519	0.238316	11.5611	6.48737e-31	1.46628e-28
CG14527	10.5951	3.07762	0.870185	3.53674	0.000405097	0.00195252
CG14528	135.875	3.14761	0.562435	5.5964	2.18843e-08	2.93902e-07
CG14529	7.85828	0.213403	0.837938	0.254676	0.798973	0.873109
CG14535	1126.6	-0.437013	0.166163	-2.63003	0.00853769	0.0264035
CG14540	2.94673	2.54886	2.13715	1.19264	0.233009	0.368233
CG14543	82.3155	0.374451	0.281246	1.3314	0.183058	0.30926
CG14544	15.3984	0.860357	0.695432	1.23715	0.21603	0.3485
CG14545	2.25886	0.433896	1.34009	0.32378	0.746104
CG14556	6.12857	-1.35076	0.888923	-1.51954	0.128626	0.236155
CG14561	41.4588	0.751551	0.394454	1.90529	0.0567418	0.124642
CG14562	1784.95	-0.227064	0.126811	-1.79057	0.0733623	0.15263
CG14565	18.8939	-5.0023	1.18774	-4.21161	2.53561e-05	0.000169835
CG14566	5.72993	-3.16435	1.61195	-1.96305	0.0496402	0.111828
CG14567	66.6907	2.57181	0.503683	5.10602	3.29023e-07	3.39012e-06
CG14572	2.26038	-4.83849	2.45223	-1.9731	0.0484846
CG1458	1119.17	-0.200109	0.107621	-1.85938	0.0629732	0.13509
CG14589	13.3052	-0.431701	0.733965	-0.588176	0.556414	0.684912
CG14590	34.8255	-0.740506	0.488589	-1.5156	0.12962	0.237365
CG14591	1405.18	-0.509396	0.114983	-4.4302	9.41454e-06	7.02816e-05
CG14598	1.64249	-0.940978	1.78155	-0.528179	0.597375
CG14608	3.58972	-2.35246	1.47087	-1.59936	0.10974	0.208844
CG14609	6.61759	-0.523197	0.886086	-0.590458	0.554883	0.683661
CG1461	46.102	2.88778	0.625003	4.62043	3.82941e-06	3.1413e-05
CG14613	352.201	0.216871	0.159575	1.35905	0.174131	0.297777
CG14615	84.307	2.48763	0.298475	8.33447	7.78485e-17	3.47472e-15
CG14618	106.407	0.612424	0.221734	2.76198	0.00574522	0.0190545
CG14619	4702.93	-0.0793546	0.120664	-0.65765	0.510763	0.647731
CG14621	551.978	-0.264015	0.146003	-1.80829	0.0705616	0.147718
CG14625	1.85756	-1.74315	1.56823	-1.11154	0.266337
CG14629	956.935	3.38486	0.203362	16.6445	3.31683e-62	5.87244e-59
CG1463	267.88	-0.225527	0.188339	-1.19745	0.23113	0.366407
CG14630	153.713	2.13083	0.283858	7.50669	6.06393e-14	1.91718e-12
CG14636	33.888	2.02891	0.457645	4.43338	9.27657e-06	6.93491e-05
CG14641	515.611	0.204151	0.134088	1.52252	0.12788	0.235029
CG14642	11.8127	2.03176	0.757868	2.68089	0.00734258	0.0234566
CG14644	2.5321	0.351006	1.40722	0.249432	0.803026	0.875737
CG14645	298.189	2.34699	2.71349	0.864934	0.387075	0.532494
CG14646	225.052	-0.0702572	0.174453	-0.402729	0.687148	0.79051
CG14647	411.044	0.0559376	0.136038	0.411192	0.680932	0.785421
CG14650	947.247	-0.510188	0.156144	-3.26742	0.00108533	0.00457493
CG14651	3.76364	-1.19531	1.26939	-0.941643	0.346375	0.490999
CG14655	5.84672	-0.0684342	1.05035	-0.0651536	0.948052	0.968774
CG14657	772.916	-0.273345	0.106832	-2.55865	0.010508	0.0314351
CG14661	119.198	1.30811	0.465895	2.80774	0.00498907	0.0169127
CG14662	7.34718	-0.518362	0.75969	-0.682333	0.495028	0.634341
CG14664	1.4516	3.79252	2.2071	1.71833	0.0857372
CG14667	240.177	0.206979	0.162336	1.27501	0.202307	0.332392
CG14669	2938.36	-0.675563	0.138916	-4.86309	1.15565e-06	1.05378e-05
CG14671	109.242	0.222081	0.249068	0.891645	0.372583	0.517921
CG1468	467.478	1.56239	0.203367	7.68262	1.55863e-14	5.28988e-13
CG14683	677.879	0.149713	0.111644	1.34098	0.179925	0.30535
CG14687	1558.17	-0.0421575	0.127591	-0.330412	0.741089	0.829217
CG14688	820.673	0.360001	0.287316	1.25298	0.210213	0.341608
CG14692	11.7836	0.941056	0.663397	1.41854	0.156033	0.2742
CG14694	2.54089	1.13711	1.43369	0.793136	0.427699	0.571718
CG14695	24.3643	1.01242	0.498984	2.02897	0.0424618	0.0986596
CG14696	230.699	-0.0593112	0.30528	-0.194285	0.845953	0.903717
CG14701	51.6186	0.487052	0.342385	1.42252	0.154874	0.272704
CG14710	120.006	0.283946	0.206382	1.37583	0.168875	0.290802
CG14711	171.987	0.278655	0.200261	1.39146	0.164086	0.284562
CG14712	430.753	-0.0954697	0.154184	-0.619193	0.535789	0.667446
CG14715	50.0082	0.307317	0.336251	0.913952	0.360742	0.505629
CG14718	1.99972	1.0089	2.29801	0.439033	0.660638
CG14721	281.863	-0.10039	0.182483	-0.550136	0.582226	0.707422
CG14722	525.631	-0.00542748	0.137155	-0.039572	0.968434	0.98077
CG14741	1828.89	0.201493	0.187682	1.07359	0.283008	0.425113
CG14742	3.30377	0.146404	1.35596	0.107971	0.914019	0.947188
CG14749	327.038	0.0355206	0.233961	0.151823	0.879327	0.926091
CG14752	7.10026	-0.93386	0.922241	-1.0126	0.311252	0.454243
CG14757	432.451	-0.0902599	0.167201	-0.539828	0.589316	0.713425
CG14760	3.27653	0.168733	1.1158	0.151222	0.879801	0.926368
CG14762	12117.3	-0.313069	0.117557	-2.66313	0.00774181	0.0244911
CG14763	2.50987	-1.74321	1.36178	-1.2801	0.20051	0.330669
CG14764	1079.1	-0.120065	0.101886	-1.17842	0.238629	0.374244
CG14767	6434.31	-0.80583	0.0919334	-8.76537	1.86165e-18	1.03002e-16
CG14777	442.146	0.0489659	0.210832	0.23225	0.816344	0.884629
CG14778	18.9417	0.568764	0.514605	1.10524	0.269054	0.40873
CG14780	3.00445	0.428435	1.17602	0.36431	0.715626	0.812414
CG14785	62.2717	0.826123	0.315464	2.61876	0.00882506	0.027142
CG14786	510.886	0.27821	0.133918	2.07747	0.0377581	0.0891475
CG14787	18.7028	-0.913581	0.534387	-1.70959	0.0873422	0.174475
CG14795	7.55773	-0.156807	1.07277	-0.146171	0.883787	0.928786
CG14797	5.8869	-2.5401	1.0989	-2.31148	0.0208062	0.0550212
CG14798	23.2538	0.831171	0.555252	1.49693	0.134412	0.243871
CG14803	139.247	0.335214	0.215066	1.55865	0.119078	0.222745
CG14805	256.511	0.424186	0.189955	2.23309	0.0255429	0.0648523
CG14806	445.667	-0.376343	0.140344	-2.68157	0.0073277	0.0234182
CG14811	4.11468	-0.688237	1.03593	-0.664366	0.506456	0.643865
CG14812	214.419	0.179006	0.184645	0.969457	0.332317	0.476527
CG14814	95.7713	0.830313	0.286655	2.89656	0.00377277	0.0134175
CG14817	260.896	0.308846	0.179458	1.721	0.085251	0.171584
CG14818	602.554	0.311748	0.172224	1.81013	0.0702762	0.147393
CG14820	13.4017	1.50104	0.671284	2.23608	0.0253467	0.0644816
CG14823	56.2744	4.0532	0.516727	7.84399	4.36454e-15	1.56109e-13
CG14830	32.6943	-0.0884704	0.368072	-0.240362	0.81005	0.880774
CG14834	17.9754	0.490379	0.575243	0.852472	0.393952	0.538396
CG14837	6.9283	-0.402989	0.979674	-0.411351	0.680815	0.785421
CG14853	3224.25	-0.585156	0.0841357	-6.9549	3.528e-12	8.81834e-11
CG14855	174.056	0.756231	0.335397	2.25474	0.0241498	0.062042
CG14856	8.70683	0.264034	0.705537	0.374231	0.708233	0.806124
CG14857	48.0228	-0.232423	0.359757	-0.646055	0.518244	0.653992
CG1486	1023.97	0.00901014	0.124694	0.0722581	0.942397	0.965299
CG14860	2.58016	4.62435	1.82244	2.53745	0.0111662	0.0330459
CG14864	55.2905	-0.132786	0.333812	-0.397788	0.690787	0.79315
CG14866	4.37154	0.581747	1.00427	0.579272	0.562406	0.690208
CG14868	729.779	-0.0327981	0.171188	-0.191591	0.848062	0.904579
CG14877	16.7999	-0.815445	0.570916	-1.42831	0.153203	0.270389
CG14879	20.0737	0.238898	0.53683	0.445016	0.656308	0.767922
CG14880	32.8712	-0.312269	0.703394	-0.443946	0.657082	0.768319
CG14881	134.927	-0.0313406	0.226816	-0.138176	0.890101	0.932869
CG14882	176.656	-0.0342308	0.215476	-0.158861	0.873778	0.92222
CG14883	434.946	0.31156	0.144717	2.15288	0.031328	0.0768052
CG14892	10.1522	-1.15386	0.695789	-1.65834	0.0972487	0.190001
CG14894	306.747	0.253525	0.230546	1.09968	0.271474	0.411745
CG14898	86.2953	-0.0283238	0.272784	-0.103832	0.917303	0.949477
CG14903	155.88	0.371458	0.191112	1.94367	0.0519354	0.115979
CG14905	2.13741	1.00141	1.47763	0.677715	0.497952
CG14906	82.4914	0.172823	0.300361	0.575385	0.565031	0.69231
CG14907	25.6254	0.65444	0.514458	1.2721	0.203339	0.333756
CG1492	589.27	-0.146363	0.124911	-1.17174	0.2413	0.377237
CG14921	2.33906	-0.0320219	1.37943	-0.0232139	0.98148
CG14926	2.14709	1.16305	2.26823	0.512759	0.60812
CG14931	2.02851	-1.83481	2.43684	-0.752947	0.451482
CG14933	189.332	0.50799	0.21295	2.38549	0.0170566	0.0467607
CG14937	53.9036	0.19729	0.364838	0.540761	0.588673	0.71289
CG1494	6.62921	-1.32337	0.995012	-1.33	0.183517	0.309691
CG14945	3535.71	-1.23849	0.115612	-10.7125	8.89639e-27	1.33108e-24
CG14946	360.444	-0.492279	0.300192	-1.63988	0.10103	0.195562
CG14947	3.80805	0.348645	1.18064	0.295303	0.767763	0.849224
CG14949	4.71044	1.11764	1.31069	0.85271	0.39382	0.538285
CG14961	119.053	-0.549844	1.37647	-0.39946
CG14964	11.0096	0.615451	0.702174	0.876492	0.380762	0.525782
CG14965	73.4311	-0.124195	0.276273	-0.449538	0.653044	0.765536
CG14966	64.016	0.385872	0.278282	1.38662	0.165556	0.286574
CG14967	889.065	-0.527905	0.123699	-4.26766	1.97538e-05	0.000135646
CG14968	93.886	-1.20662	0.352529	-3.42276	0.000619878	0.00282328
CG14969	391.724	0.3886	0.151209	2.56995	0.0101712	0.0306782
CG14971	515.261	0.195812	0.125343	1.56221	0.118238	0.221641
CG14977	183.424	0.433431	0.207069	2.09317	0.036334	0.0864744
CG14982	1847.1	-0.557011	0.129717	-4.29406	1.75434e-05	0.000121647
CG14984	28.6806	-1.73875	0.443351	-3.92185	8.78729e-05	0.000513462
CG14985	48.6622	1.2129	0.362327	3.34753	0.00081535	0.00357027
CG14989	23814.6	-0.827079	0.096163	-8.6008	7.91618e-18	4.06249e-16
CG14990	2.05767	-2.64529	1.72596	-1.53265	0.125362
CG14995	854.028	-0.298596	0.111993	-2.6662	0.0076715	0.0243194
CG14997	343.139	0.67397	0.156894	4.29571	1.74137e-05	0.000120827
CG15011	156.063	0.770482	0.196698	3.91708	8.96296e-05	0.000522864
CG15012	829.832	-0.217765	0.125103	-1.74069	0.0817384	0.165954
CG15014	106.323	0.415621	0.246405	1.68674	0.0916535	0.181378
CG15019	191.933	0.429389	0.21466	2.00032	0.0454662	0.104047
CG15021	30.436	-1.63605	0.597287	-2.73913	0.0061602	0.0202162
CG15025	2.8912	-1.5638	1.31465	-1.18952	0.234235	0.369675
CG15027	62.6087	0.659319	0.309095	2.13306	0.0329197	0.080034
CG1503	12.3183	0.211121	0.687807	0.306948	0.758883	0.843001
CG1504	163.949	-0.845648	0.263684	-3.20705	0.00134102	0.00549814
CG15040	4.82353	-0.450956	0.997048	-0.452291	0.651059	0.764053
CG15043	6.769	-0.322548	0.832642	-0.387379	0.698476	0.798613
CG15046	17.2032	0.738325	0.621041	1.18885	0.234498	0.369922
CG15047	5.13988	-1.5647	0.951837	-1.64388	0.100201	0.19434
CG15065	32.4585	1.37122	0.679807	2.01707	0.0436879	0.100934
CG15067	325.307	1.17943	0.357242	3.30148	0.00096176	0.00412632
CG15068	415.127	2.3516	0.376916	6.23904	4.40265e-10	8.1056e-09
CG15071	2.56241	-1.7546	2.00244	-0.876234	0.380903	0.525839
CG15073	150.363	0.0957545	0.183151	0.522819	0.6011	0.723411
CG15080	81.1673	-0.0564275	0.316881	-0.178071	0.858667	0.911904
CG15082	150.708	0.363273	0.192581	1.88634	0.059249	0.128844
CG15083	22.9597	0.418452	0.51302	0.815665	0.414692	0.558619
CG15084	79.3603	0.465867	0.291208	1.59978	0.109648	0.208706
CG15087	494.96	-0.189355	0.11777	-1.60784	0.107871	0.206285
CG15093	293.682	2.04556	0.28051	7.29229	3.04719e-13	8.74874e-12
CG15096	552.393	2.25541	0.797565	2.82787	0.00468584	0.0160064
CG15097	255.106	0.0883439	0.171127	0.516248	0.605681	0.726612
CG15098	3652.11	-0.115134	0.215088	-0.535289	0.59245	0.716115
CG15099	2234.56	-0.75614	0.153897	-4.9133	8.95565e-07	8.35258e-06
CG15100	568.846	0.168446	0.121061	1.39142	0.164099	0.284562
CG15107	129.483	-0.266673	0.214386	-1.24389	0.213539	0.345624
CG15109	5.75733	-0.850196	1.04718	-0.811891	0.416854	0.560395
CG15111	1059.11	0.392668	0.103322	3.80042	0.000144452	0.000792212
CG15117	105.201	0.70299	0.279072	2.51902	0.0117681	0.0345052
CG15118	631.034	0.227651	0.127604	1.78404	0.0744166	0.15402
CG15120	4.3162	2.27339	1.24443	1.82685	0.0677217	0.142995
CG15127	2.41217	-4.93051	2.63078	-1.87416	0.0609085	0.13166
CG15128	1.80526	0.935782	1.98508	0.471408	0.63735
CG1513	3584.37	-0.392665	0.109656	-3.58088	0.000342443	0.00169278
CG15130	2.88535	-0.286954	1.27635	-0.224824	0.822116	0.887898
CG15141	452.787	0.159952	0.156219	1.0239	0.305884	0.448248
CG15143	10.4884	1.42631	0.680758	2.09518	0.0361553	0.0862322
CG15144	8.80666	0.46367	0.782167	0.592801	0.553314	0.682598
CG15145	7.86431	0.0926501	0.984038	0.0941529	0.924988	0.954643
CG15153	1.47929	1.62628	2.53713	0.640995	0.521526
CG1516	2222.06	0.827865	0.124031	6.67469	2.47759e-11	5.62382e-10
CG15160	541.71	-0.0475812	0.119269	-0.39894	0.689938	0.792604
CG15161	3.80292	0.164275	1.12444	0.146095	0.883847	0.928786
CG15168	197.919	0.515727	0.208115	2.47809	0.0132088	0.0379703
CG15172	1.98629	-4.63232	2.12677	-2.1781	0.0293989
CG15177	2.6934	-3.02691	2.23514	-1.35423	0.175662	0.299792
CG1518	967.349	0.48414	0.128911	3.75563	0.000172907	0.000925334
CG15186	67.257	-0.830069	0.316807	-2.62011	0.00879019	0.0270661
CG15196	7.40542	-1.02426	0.800644	-1.27929	0.200794	0.330909
CG15198	2.01785	0.494051	1.6125	0.306388	0.759309
CG15199	34.6377	3.03655	0.558211	5.43979	5.33439e-08	6.58156e-07
CG15200	2.2779	-2.74541	2.37016	-1.15832	0.246734
CG15201	2411.84	0.698725	0.111462	6.26875	3.63948e-10	6.79476e-09
CG15202	36.4674	0.822447	0.405431	2.02857	0.0425018	0.0987309
CG15203	145.087	0.284361	0.222672	1.27704	0.201588	0.33188
CG15209	5173.33	0.195104	0.105608	1.84743	0.0646855	0.137817
CG15210	68.7194	-0.142675	0.312497	-0.456564	0.647985	0.761117
CG15211	41.8403	0.157081	0.355658	0.441663	0.658733	0.768896
CG15213	6.84401	-2.77521	1.01825	-2.72546	0.00642117	0.0209304
CG15219	9.77006	-2.34742	1.74799	-1.34293	0.179296	0.3046
CG15221	15.5757	0.912478	0.654782	1.39356	0.163451	0.283808
CG1523	313.05	0.204169	0.179395	1.1381	0.25508	0.392579
CG15236	5331.05	-0.126959	0.107352	-1.18264	0.236951	0.372411
CG15237	226.53	0.120995	0.167849	0.720854	0.470999	0.611367
CG15247	8.88172	-0.852751	0.735549	-1.15934	0.246318	0.383161
CG15270	3098.76	-0.446975	0.116568	-3.83446	0.000125839	0.000704683
CG15279	140.999	-0.132106	0.289158	-0.456865	0.647768	0.760946
CG15286	3.49003	-1.5563	1.51817	-1.02511	0.30531	0.447847
CG1529	75.0434	1.05522	0.2891	3.65	0.000262236	0.00133994
CG15293	1039.42	2.82113	0.326442	8.64206	5.52066e-18	2.90327e-16
CG15296	2.13128	-1.9475	1.97143	-0.987863	0.32322
CG15306	2.41719	-0.0610464	1.83567	-0.0332557	0.973471	0.984031
CG15309	1267.78	-1.40705	0.157578	-8.9292	4.29093e-19	2.58992e-17
CG15312	2100.19	-0.610214	0.147823	-4.12802	3.65905e-05	0.000236868
CG15317	51.1727	0.934117	0.309847	3.01477	0.00257172	0.00966375
CG1532	289.191	0.39466	0.247001	1.59781	0.110086	0.209427
CG15322	5.27738	-1.03097	0.97866	-1.05345	0.292134	0.434519
CG15332	11.8035	-0.0311511	0.709416	-0.0439109	0.964975	0.978236
CG15337	3.38628	-2.74822	1.61095	-1.70596	0.0880161	0.175648
CG15343	36.1322	1.51906	0.419109	3.6245	0.000289518	0.00146176
CG15345	54.0518	0.136396	0.354482	0.384776	0.700404	0.800042
CG15347	33.7567	3.24788	0.514461	6.31317	2.73383e-10	5.24214e-09
CG15353	15.5147	2.30758	0.868997	2.65545	0.00792019	0.0249145
CG15356	873.079	0.0392646	0.122189	0.321343	0.747951	0.835399
CG15362	21.7012	1.20065	0.477096	2.51659	0.0118497	0.034687
CG15365	31.8395	0.234862	0.441121	0.532421	0.594434	0.717577
CG15368	3.27969	-0.0981456	1.30039	-0.075474	0.939838	0.963701
CG15369	11.0381	0.919511	0.795622	1.15571	0.247798	0.384566
CG1537	507.957	-1.24941	0.194677	-6.41786	1.38205e-10	2.72891e-09
CG15382	95.9348	-1.09462	0.260454	-4.20274	2.63707e-05	0.000176075
CG15385	857.084	0.263789	0.111262	2.37089	0.0177456	0.0481756
CG15387	59.8578	-0.433804	0.348512	-1.24473	0.213231	0.345245
CG15390	101.36	-0.00824823	0.262436	-0.0314295	0.974927	0.98483
CG15394	47.7789	-0.323764	0.379408	-0.853342	0.39347	0.538014
CG15399	12.8415	-1.04398	0.63953	-1.63241	0.102593	0.197865
CG15406	2.5077	-0.232219	1.30304	-0.178213	0.858556	0.911904
CG15412	84.3317	0.484959	0.281289	1.72406	0.0846974	0.170632
CG15414	8.37746	-2.09426	1.54994	-1.35119	0.176636	0.300946
CG1542	145.481	1.061	0.292435	3.62813	0.000285476	0.0014441
CG15425	2.82466	-0.482481	1.45174	-0.332346	0.739628	0.828542
CG15431	1956.88	-0.658671	0.141535	-4.65378	3.25897e-06	2.71743e-05
CG15432	160.718	-0.201708	0.254208	-0.793476	0.427501	0.571525
CG15435	115.431	0.195089	0.235228	0.829359	0.406901	0.551402
CG15436	19.4727	1.73	0.67939	2.54639	0.0108842	0.0323863
CG15439	164.034	-0.160114	0.199005	-0.804574	0.421066	0.56477
CG1544	173.457	1.82569	0.237415	7.68989	1.47257e-14	5.01381e-13
CG15440	191.259	0.144905	0.19095	0.758861	0.447936	0.589754
CG15443	255.627	0.15636	0.171479	0.911835	0.361856	0.506989
CG15445	268.134	0.231822	0.211596	1.09559	0.273258	0.413743
CG15449	51.5588	-0.430542	0.414774	-1.03802	0.299262	0.441844
CG1545	1168.17	-0.291835	0.170599	-1.71065	0.0871467	0.174276
CG15456	77.3078	-0.109781	0.286867	-0.382689	0.70195	0.801205
CG15459	5.86838	0.20598	0.912343	0.225771	0.82138	0.887551
CG15473	30.8225	0.912075	0.67352	1.35419	0.175676	0.299792
CG15475	10.2151	-0.492947	0.786973	-0.626384	0.531063	0.663626
CG15478	242.167	-0.644583	0.168742	-3.81993	0.000133488	0.000741264
CG15482	2.36457	-0.739967	1.61844	-0.457211	0.647519	0.760822
CG15484	1.54613	1.58278	1.76652	0.895989	0.370258
CG15497	14.4298	2.04143	0.654387	3.1196	0.00181095	0.00714362
CG1550	379.047	0.351805	0.144836	2.42899	0.015141	0.0424388
CG15506	6.50854	0.226106	0.905657	0.24966	0.80285	0.875635
CG15514	439.237	0.395918	0.160633	2.46474	0.0137113	0.0391335
CG1552	4504.88	-1.11473	0.110095	-10.1251	4.27395e-24	4.98925e-22
CG15522	657.229	-0.564455	0.177479	-3.18041	0.00147068	0.00595162
CG15523	487.196	-0.275049	0.216762	-1.2689	0.204477	0.33521
CG15525	105.466	0.370108	0.233179	1.58723	0.112461	0.213046
CG15529	12.2609	1.97876	0.696441	2.84125	0.00449374	0.0154789
CG15530	1.77294	-0.00926447	1.97815	-0.00468341	0.996263
CG15535	77.1671	-0.589705	0.291846	-2.02061	0.0433206	0.100341
CG15536	71.9227	0.339792	0.265685	1.27893	0.200922	0.331068
CG15537	1613.6	0.141761	0.0997633	1.42098	0.155324	0.273386
CG15539	41.0056	0.86016	0.367984	2.33749	0.0194135	0.0519078
CG15544	26.9418	-0.582725	0.472612	-1.23299	0.217581	0.350312
CG15546	14.6142	-2.1211	1.02401	-2.07137	0.0383238	0.0902088
CG15547	199.125	0.0729498	0.220011	0.331573	0.740212	0.828759
CG15550	4.89448	0.703393	0.962836	0.730543	0.465058	0.605916
CG15553	21.2738	2.89282	0.68045	4.25133	2.12504e-05	0.000144893
CG15554	9.48796	1.01948	0.792339	1.28667	0.19821	0.328279
CG15556	14.0377	0.218877	0.786524	0.278284	0.780795	0.860021
CG15561	81.2045	0.455533	0.407817	1.117	0.263993	0.402641
CG15570	2.55806	-1.77165	1.42641	-1.24204	0.214223	0.34627
CG15579	11.8115	-0.0164374	0.710421	-0.0231376	0.981541	0.988769
CG15580	4.32002	0.223891	1.06937	0.209366	0.834162	0.895676
CG15594	2.3865	-0.852749	1.55663	-0.547819	0.583816	0.708705
CG15601	105.837	0.0427835	0.244886	0.174707	0.86131	0.913508
CG15602	249.225	0.221111	0.161344	1.37043	0.170552	0.293168
CG1561	105.031	1.17315	0.58228	2.01476	0.0439299	0.101339
CG15611	255.871	-0.892818	0.171733	-5.19887	2.00507e-07	2.18684e-06
CG15614	4.26946	-0.976341	1.01549	-0.96145	0.336326	0.480536
CG15617	1.83054	1.25761	1.62297	0.774881	0.43841
CG15618	245.355	0.666441	0.189935	3.50879	0.000450144	0.00213572
CG15628	3910.09	-0.976338	0.0999768	-9.76565	1.58091e-22	1.49946e-20
CG15629	147.426	0.558183	0.270295	2.06509	0.0389143	0.0913563
CG15630	2295.05	-0.359945	0.0916228	-3.92855	8.54587e-05	0.000501205
CG15631	4.19373	-1.36645	1.10223	-1.23971	0.215083	0.347396
CG15638	1.97013	-1.77561	2.07368	-0.856262	0.391853
CG15642	117.921	-0.0608507	0.249398	-0.24399	0.807239	0.878884
CG15643	163.139	-0.224494	0.191136	-1.17453	0.240184	0.376083
CG15646	1.61546	2.81763	1.92547	1.46335	0.143371
CG15651	1085.73	-0.0598168	0.0989215	-0.60469	0.545385	0.675878
CG15653	53.3416	0.458457	0.335788	1.36532	0.172154	0.295157
CG15657	7.32759	-1.5045	1.04998	-1.43289	0.15189	0.268697
CG15661	290.417	0.320503	0.239803	1.33653	0.181377	0.307103
CG15666	51.0186	-0.244449	0.35316	-0.692178	0.488826	0.628679
CG15673	111.826	-0.41776	0.2666	-1.56699	0.117116	0.219888
CG15674	4.40201	-0.096012	1.2355	-0.0777108	0.938058	0.962702
CG15695	83.9345	1.66124	0.27108	6.12825	8.88494e-10	1.53471e-08
CG15701	39.4005	0.961087	0.352572	2.72593	0.00641201	0.0209069
CG15704	208.823	0.2052	0.166097	1.23543	0.216672	0.349166
CG15706	302.185	-0.103267	0.146455	-0.705114	0.48074	0.620673
CG15715	403.562	0.268519	0.187452	1.43247	0.15201	0.26882
CG15717	18.5009	1.98604	0.617069	3.2185	0.00128862	0.0053017
CG1572	222.591	-0.526377	0.241189	-2.18242	0.0290782	0.0721555
CG15725	259.006	-1.23682	0.192363	-6.4296	1.27941e-10	2.55473e-09
CG15728	7.46578	-0.654923	0.783709	-0.835671	0.40334	0.547493
CG15735	859.524	-0.0648474	0.121964	-0.531691	0.59494	0.718024
CG15739	45.7422	1.70037	0.382956	4.44011	8.99132e-06	6.75016e-05
CG15743	232.678	0.368551	0.183426	2.00926	0.0445097	0.102387
CG15744	496.219	-0.281495	0.159837	-1.76114	0.0782151	0.160308
CG15747	438.483	0.138126	0.159003	0.868699	0.385012	0.530271
CG1575	92.8049	0.0545345	0.246278	0.221435	0.824754	0.890111
CG15760	1656.6	-0.378958	0.139931	-2.70819	0.00676517	0.0218771
CG15765	11477.2	-0.526035	0.133423	-3.94261	8.06013e-05	0.000477007
CG15766	2.60351	0.884011	1.46173	0.604771	0.545331	0.675878
CG15771	1430.94	-0.142841	0.120861	-1.18186	0.23726	0.372801
CG15772	786.449	-0.27376	0.13528	-2.02365	0.0430063	0.0997066
CG15773	2.70061	0.172008	1.23267	0.13954	0.889023	0.932382
CG1578	2116.47	-0.308143	0.107092	-2.87736	0.00401013	0.0141058
CG15784	182.527	-0.415793	0.458305	-0.907241	0.36428	0.509177
CG15803	1339.23	-0.502396	0.171738	-2.92536	0.00344056	0.0123937
CG15814	666.125	0.405144	0.117741	3.44096	0.000579645	0.00267139
CG15817	1743.9	-0.244313	0.145034	-1.68452	0.0920815	0.182055
CG1582	462.993	0.166042	0.138768	1.19655	0.231482	0.366638
CG15822	17.529	-2.63021	1.07189	-2.45381	0.0141352	0.0400929
CG15824	4.24587	0.863085	1.02413	0.842753	0.399367	0.54328
CG15829	1.7597	-1.61415	1.66442	-0.969796	0.332148
CG15831	56.6139	-2.97582	0.474341	-6.2736	3.52783e-10	6.59792e-09
CG15861	32.0013	0.631954	0.400031	1.57976	0.114161	0.215368
CG15863	57.6169	0.395691	0.298254	1.32669	0.184612	0.310895
CG15864	37.1769	0.640565	0.37126	1.72538	0.0844587	0.170377
CG15870	4.43449	0.912081	0.991146	0.920228	0.357454	0.502469
CG15877	57.2873	0.452415	0.340838	1.32736	0.184389	0.310718
CG15879	5.12385	1.872	1.04458	1.79212	0.0731145	0.152234
CG15881	175.171	-0.0452742	0.19868	-0.227875	0.819743	0.886775
CG15887	1.59941	0.203946	1.5567	0.131012	0.895766
CG15890	203.373	0.882621	0.238749	3.69686	0.000218285	0.00113748
CG15891	272.847	-0.166808	0.175112	-0.952582	0.340802	0.485109
CG15892	7.96331	-0.24858	0.801978	-0.309958	0.756593	0.841585
CG15894	2896.95	-0.464536	0.153452	-3.02725	0.00246789	0.00932968
CG15896	83.1794	1.04431	0.251097	4.15898	3.19676e-05	0.000209448
CG15908	128.487	0.496458	0.210418	2.35939	0.0183052	0.0493919
CG15909	6.3655	-1.94108	1.11272	-1.74445	0.0810802	0.164971
CG15912	116.853	-0.204186	0.238813	-0.855003	0.39255	0.537378
CG15914	31.1275	0.746761	0.58336	1.2801	0.200509	0.330669
CG15916	260.258	-0.195716	0.154398	-1.26761	0.204939	0.335605
CG15922	82.5156	-0.230352	0.242209	-0.951044	0.341582	0.485886
CG15923	37.0989	0.0104316	0.355638	0.029332	0.9766	0.985787
CG15927	14.4059	-0.763644	0.627339	-1.21728	0.223499	0.357404
CG1597	742.361	-0.15643	0.167511	-0.933852	0.35038	0.495156
CG1598	554.132	0.239231	0.142168	1.68273	0.092427	0.182568
CG1602	79.3198	0.806906	0.32678	2.46927	0.013539	0.0387564
CG1603	221.532	0.0693495	0.165807	0.418254	0.675762	0.782155
CG1607	3563.79	-0.628461	0.103059	-6.09808	1.07347e-09	1.81584e-08
CG1620	429.486	0.379033	0.226928	1.67028	0.0948647	0.186482
CG1622	300.833	0.47644	0.14268	3.33923	0.00084012	0.00366815
CG1628	159.388	2.08094	0.308871	6.73725	1.61409e-11	3.78509e-10
CG1632	3.0493	-0.13179	1.21061	-0.108862	0.913312	0.946732
CG1635	743.229	-0.0905574	0.124359	-0.728194	0.466495	0.607164
CG1636	1067.21	-0.464186	0.151583	-3.06225	0.00219682	0.0084523
CG1637	2254.84	0.0135178	0.118663	0.113918	0.909303	0.944789
CG1638	16.9643	-0.151855	0.508279	-0.298762	0.765121	0.847272
CG1640	5826.24	-0.469784	0.120801	-3.8889	0.0001007	0.000575746
CG1646	2785.57	0.241342	0.173244	1.39308	0.163597	0.284015
CG1647	416.497	0.0157318	0.161564	0.097372	0.922431	0.953023
CG1648	1987.14	0.314314	0.167703	1.87423	0.0608992	0.13166
CG1657	2716.54	-0.23174	0.133098	-1.74112	0.0816621	0.165901
CG1662	243.824	0.544105	0.168781	3.22373	0.00126532	0.00522406
CG1663	101.781	0.00588106	0.232685	0.0252748	0.979836	0.987645
CG1665	210.089	0.666427	0.203084	3.28153	0.00103244	0.00438003
CG1667	92.1468	0.908251	0.320219	2.83634	0.00456331	0.015683
CG16700	583.168	0.144316	0.173281	0.832842	0.404934	0.549235
CG16704	139.449	2.65905	0.961105	2.76665	0.00566348	0.0188304
CG1671	208.083	0.300617	0.182925	1.64339	0.100302	0.194436
CG16710	17.3815	1.6532	0.587364	2.81461	0.00488369	0.0166056
CG16711	3050.52	0.0822392	0.178022	0.46196	0.64411	0.757906
CG16712	796.431	2.0473	0.716722	2.85647	0.00428377	0.0148957
CG16713	63.8717	2.10052	0.474374	4.42798	9.51185e-06	7.08089e-05
CG16717	430.917	0.220001	0.138321	1.59052	0.111718	0.211888
CG16721	1870.53	-1.10054	0.211895	-5.1938	2.06042e-07	2.24261e-06
CG1673	794.553	-2.00755	0.813277	-2.46847	0.0135691	0.038828
CG16734	59.2793	0.276241	0.316629	0.872446	0.382965	0.527905
CG16736	2.88413	0.569599	1.41915	0.401365	0.688151	0.791236
CG16739	44.332	1.74497	0.395635	4.41054	1.03112e-05	7.58559e-05
CG1674	146.997	-0.615802	0.203274	-3.02942	0.00245024	0.00926953
CG16742	485.038	-0.247478	0.178597	-1.38568	0.165845	0.287027
CG16743	586.175	0.677057	0.192318	3.5205	0.000430727	0.00205923
CG16749	49.027	0.676659	0.447926	1.51065	0.130878	0.239009
CG16753	84.5346	0.833141	0.304288	2.738	0.00618142	0.0202796
CG16756	56.4716	2.6773	0.375165	7.13631	9.58662e-13	2.62471e-11
CG16758	2053.46	1.61025	0.185136	8.69768	3.38736e-18	1.81737e-16
CG1677	2613.62	-0.13003	0.174963	-0.743186	0.457369	0.599091
CG16771	192.539	0.294005	0.230345	1.27637	0.201825	0.332041
CG16772	176.275	0.834123	0.504075	1.65476	0.0979731	0.191142
CG16779	7623.84	-0.856267	0.185124	-4.62538	3.73914e-06	3.07544e-05
CG1678	444.903	-9.56917	3.37833	-2.83252
CG16782	2.62035	-1.34359	1.59116	-0.844406	0.398442	0.542439
CG16786	11.7478	-3.93351	0.938605	-4.19081	2.77964e-05	0.000185013
CG16787	237.905	-0.0835049	0.213446	-0.391223	0.695632	0.796691
CG16789	339.865	0.548077	0.26203	2.09166	0.0364693	0.0867472
CG16790	63.3493	0.197735	0.299403	0.66043	0.508978	0.646137
CG16791	8068.86	-0.770416	0.160644	-4.79579	1.62039e-06	1.43804e-05
CG16798	16.551	-0.703643	0.579714	-1.21378	0.224833	0.358835
CG16799	79.6817	0.81228	0.309696	2.62283	0.0087203	0.0268665
CG16812	407.559	0.35355	0.160172	2.20731	0.0272924	0.0686055
CG16817	1246.81	0.253176	0.100618	2.51621	0.0118623	0.0347049
CG16820	88.255	0.183796	0.482908	0.380602	0.703498	0.802369
CG16825	2.80122	-1.50734	1.37827	-1.09364	0.274113	0.414683
CG16826	964.597	-7.59978	3.49968	-2.17156
CG16833	2233.84	-0.370824	0.160471	-2.31085	0.0208409	0.0550867
CG16836	107.742	1.37546	0.375392	3.66407	0.000248242	0.00127704
CG16837	3.16361	-2.62112	2.3054	-1.13695	0.255561	0.392883
CG16838	53.0922	0.290071	0.322214	0.900245	0.36799	0.512945
CG16854	672.816	-0.389723	0.116971	-3.3318	0.000862872	0.00375514
CG16857	4901.21	-1.26523	0.181704	-6.96313	3.32802e-12	8.4175e-11
CG16863	115	0.252724	0.246083	1.02699	0.304426	0.447107
CG16865	232.767	0.400793	0.168591	2.37731	0.0174396	0.0475852
CG16868	402.612	-0.4582	0.127644	-3.58967	0.0003311	0.00164512
CG16879	3.98789	0.635248	1.30658	0.486193	0.626831	0.74367
CG1688	1218.12	-0.0732618	0.181717	-0.403164	0.686828	0.790313
CG16884	70.3263	-4.71488	0.789592	-5.97129	2.35386e-09	3.78865e-08
CG16885	62.4592	-4.53307	0.70287	-6.44937	1.12315e-10	2.2813e-09
CG16886	18.5594	-4.96318	1.18129	-4.20149	2.65168e-05	0.00017694
CG16890	166.886	0.482715	0.188422	2.56188	0.0104107	0.0311765
CG16892	137.829	-0.16599	0.210498	-0.788559	0.43037	0.574277
CG16896	278.85	0.114005	0.152247	0.748816	0.453968	0.596254
CG16898	27.291	2.08532	0.496127	4.20321	2.63161e-05	0.000175821
CG16903	443.319	0.584528	0.227088	2.57401	0.0100527	0.0303638
CG16908	159.063	-0.296502	0.205842	-1.44044	0.149744	0.265697
CG16926	284.602	1.45713	0.303301	4.80423	1.55347e-06	1.38677e-05
CG16935	649.486	-0.227896	0.161248	-1.41333	0.157559	0.276106
CG16940	779.56	-0.206327	0.132488	-1.55733	0.119393	0.223121
CG16941	493.073	0.36651	0.163964	2.23531	0.0253968	0.0645585
CG16947	711.437	0.546017	0.14088	3.87575	0.000106298	0.0006045
CG1695	2690.52	-0.493836	0.129357	-3.81763	0.00013474	0.000746659
CG16952	2155.67	-0.584926	0.110089	-5.31321	1.07713e-07	1.24781e-06
CG16953	2939.52	-0.0406189	0.148629	-0.273291	0.78463	0.862403
CG16959	18.8663	0.164161	0.543559	0.302012	0.762643	0.845487
CG16965	98.3487	1.82706	0.368565	4.95723	7.15057e-07	6.86804e-06
CG16972	557.957	-0.214933	0.147547	-1.45671	0.145196	0.259666
CG16974	5726.62	-0.573218	0.135869	-4.21892	2.45475e-05	0.000164939
CG16978	17.6131	0.116605	0.754801	0.154484	0.877228	0.924942
CG16979	264.641	0.140496	0.158084	0.888742	0.374142	0.518986
CG1698	71.7052	-1.24328	0.829281	-1.49923	0.133814	0.243035
CG16984	6.34298	-1.10207	0.828785	-1.32975	0.183602	0.309709
CG16985	72.6881	0.319992	0.271286	1.17954	0.238185	0.373853
CG16986	262.77	0.00386271	0.202239	0.0190997	0.984762	0.990837
CG16989	457.764	0.2374	0.144406	1.64398	0.100181	0.19434
CG17002	213.739	0.578901	0.230263	2.51409	0.0119342	0.0347976
CG17005	14.3762	0.192853	0.657445	0.293337	0.769264	0.850707
CG17010	1.91446	-1.73608	1.65636	-1.04813	0.294578
CG17018	47.8939	2.38694	0.437082	5.46108	4.73256e-08	5.89678e-07
CG17019	740.112	-0.0581926	0.169873	-0.342565	0.731926	0.823649
CG17026	255.614	0.118978	0.229645	0.518095	0.604392	0.725804
CG17027	166.985	0.163289	0.281993	0.579054	0.562553	0.690308
CG17028	21.9119	0.048114	0.541021	0.0889318	0.929136	0.957251
CG17029	472.316	-0.328756	0.18373	-1.78934	0.0735604	0.152892
CG1703	413.88	0.410838	0.201856	2.0353	0.0418206	0.0974254
CG17030	5.98649	-3.19733	1.86319	-1.71605	0.0861534	0.172844
CG17032	92.8017	0.591547	0.462762	1.2783	0.201145	0.331384
CG17036	61.9766	1.09809	0.296607	3.70218	0.000213754	0.00111803
CG17047	11.5297	0.286808	0.744585	0.385191	0.700096	0.799948
CG17048	4.55469	-2.74949	1.80935	-1.5196	0.128611	0.236155
CG17059	365.378	0.34497	0.227071	1.51922	0.128708	0.236266
CG17065	703.584	0.531236	0.210295	2.52615	0.0115319	0.0338635
CG17068	288.148	0.242799	0.15475	1.56898	0.116653	0.219174
CG1707	180.591	0.865706	0.188308	4.59727	4.28055e-06	3.46852e-05
CG17075	2385.29	-1.14259	0.185632	-6.15512	7.50193e-10	1.31942e-08
CG17078	578.531	0.101339	0.115866	0.874626	0.381778	0.526841
CG17104	4.85515	-2.20634	1.6032	-1.37621	0.168756	0.290738
CG17107	4.96807	4.55302	1.59444	2.85556	0.00429607	0.0149092
CG17108	2569.09	5.21523	0.671391	7.76781	7.98567e-15	2.78137e-13
CG17109	29.2057	6.24445	1.16767	5.34778	8.90374e-08	1.04861e-06
CG17111	125.761	-0.0608804	0.284442	-0.214035	0.83052	0.89361
CG17118	8.404	0.508779	0.748902	0.679367	0.496905	0.635979
CG17119	102.238	2.448	0.264774	9.24564	2.33839e-20	1.64508e-18
CG17121	120.299	-0.73358	0.245508	-2.98801	0.00280804	0.0104112
CG17122	21.4549	-0.497755	0.492509	-1.01065	0.312183	0.45526
CG17124	1858.57	-0.491696	0.0986876	-4.98235	6.28183e-07	6.12781e-06
CG17127	2.90161	1.51434	1.32027	1.147	0.251383	0.388597
CG17129	31.5648	0.649145	0.46624	1.3923	0.163832	0.284284
CG17141	79.3546	0.263195	0.249574	1.05458	0.29162	0.433876
[truncated: 9,088 more rows]

## Sheet: Brain_Transcriptome_Up
id	baseMean	log2FoldChange	lfcSE	stat	pvalue	padj
Adgf-A	39.292	2.34533	0.535174	4.38238	1.17391e-05	8.52972e-05
AkhR	115.795	2.66241	0.396867	6.70858	1.96528e-11	4.55833e-10
Amy-d	149.466	5.44897	0.552602	9.86056	6.17061e-23	6.36412e-21
Amy-p	65.2884	4.13181	0.625874	6.60167	4.06555e-11	9.01635e-10
Ance-4	162.146	3.18544	0.359835	8.8525	8.55795e-19	4.96782e-17
Ance-5	295.197	3.12061	0.217294	14.3612	9.05958e-47	6.87428e-44
CG10131	137.467	2.57009	0.316013	8.13286	4.19287e-16	1.76051e-14
CG10336	49.6921	2.38219	0.389822	6.11097	9.90243e-10	1.6831e-08
CG10361	341.915	2.0097	0.163562	12.2871	1.06235e-34	3.0501e-32
CG10396	12.2341	2.54239	0.820207	3.09969	0.00193723	0.00759378
CG10486	4.36271	4.35885	1.53764	2.83476	0.00458602	0.0157406
CG10621	457.367	2.76659	0.375988	7.35819	1.86426e-13	5.48587e-12
CG10680	383.347	2.11864	0.355976	5.95165	2.65456e-09	4.22146e-08
CG10799	205.548	3.69874	0.449834	8.22246	1.99369e-16	8.53991e-15
CG10814	14.7424	3.35213	1.0713	3.12904	0.00175377	0.00694643
CG10824	85.1492	3.03262	0.511769	5.92575	3.10867e-09	4.87071e-08
CG10962	29.9452	2.38541	0.53574	4.45255	8.48568e-06	6.39315e-05
CG11041	5.2212	2.58013	1.09354	2.35942	0.0183037	0.0493919
CG11236	73.0662	3.16623	0.393774	8.04074	8.92943e-16	3.50027e-14
CG11391	66.3139	4.33028	0.530824	8.15765	3.41599e-16	1.44574e-14
CG11395	445.904	2.87063	0.393023	7.30398	2.79383e-13	8.08687e-12
CG11400	145.036	2.73467	0.50707	5.39308	6.92588e-08	8.36064e-07
CG1143	43.6775	2.48973	0.424484	5.86531	4.48293e-09	6.84227e-08
CG11594	570.204	2.39044	0.24063	9.93407	2.95928e-23	3.14365e-21
CG11741	11.7707	4.90048	1.19393	4.10451	4.05177e-05	0.000259758
CG11841	47.8231	2.48632	0.554786	4.48159	7.40892e-06	5.68677e-05
CG12256	641.111	6.11426	0.367302	16.6464	3.21433e-62	5.87244e-59
CG12269	1674.93	2.00735	0.126963	15.8105	2.63183e-56	3.49474e-53
CG1246	17.0508	3.20347	0.739735	4.33056	1.48727e-05	0.00010484
CG12698	10.0629	2.85229	1.01876	2.79977	0.00511397	0.0172408
CG13026	10.8731	3.7046	1.02846	3.60208	0.000315684	0.0015766
CG13086	26.8215	2.53451	0.512029	4.94993	7.42396e-07	7.07608e-06
CG1315	42.179	3.42118	0.476819	7.175	7.23048e-13	2.00024e-11
CG13283	58.9347	2.71033	0.547318	4.95203	7.34445e-07	7.00989e-06
CG13422	43.7511	4.00704	0.594369	6.74167	1.56574e-11	3.68799e-10
CG13488	9.64366	4.00096	1.07703	3.71482	0.000203349	0.00106993
CG13607	216.444	2.82308	0.516635	5.46436	4.64585e-08	5.80622e-07
CG13690	8.76997	2.22162	0.935244	2.37545	0.0175276	0.0477181
CG13704	28.1243	4.30593	0.770843	5.586	2.32359e-08	3.10094e-07
CG13741	5.30754	3.12773	1.25225	2.49768	0.0125009	0.0361845
CG13742	4.82881	3.58768	1.41392	2.53741	0.0111677	0.0330459
CG13794	53.751	2.3796	0.489276	4.86351	1.15321e-06	1.05245e-05
CG13833	23.0205	3.27369	0.75346	4.34488	1.39353e-05	9.91528e-05
CG13912	55.8824	2.80766	0.456527	6.15003	7.74676e-10	1.35798e-08
CG13965	6.18122	3.91537	1.29152	3.0316	0.00243265	0.00920956
CG14400	73.095	3.48641	0.447547	7.79006	6.6978e-15	2.35598e-13
CG14502	11.3162	2.46716	0.792855	3.11174	0.00185987	0.00732028
CG14526	295.929	2.75519	0.238316	11.5611	6.48737e-31	1.46628e-28
CG14527	10.5951	3.07762	0.870185	3.53674	0.000405097	0.00195252
CG14528	135.875	3.14761	0.562435	5.5964	2.18843e-08	2.93902e-07
CG14567	66.6907	2.57181	0.503683	5.10602	3.29023e-07	3.39012e-06
CG1461	46.102	2.88778	0.625003	4.62043	3.82941e-06	3.1413e-05
CG14615	84.307	2.48763	0.298475	8.33447	7.78485e-17	3.47472e-15
CG14629	956.935	3.38486	0.203362	16.6445	3.31683e-62	5.87244e-59
CG14630	153.713	2.13083	0.283858	7.50669	6.06393e-14	1.91718e-12
CG14636	33.888	2.02891	0.457645	4.43338	9.27657e-06	6.93491e-05
CG14642	11.8127	2.03176	0.757868	2.68089	0.00734258	0.0234566
CG14823	56.2744	4.0532	0.516727	7.84399	4.36454e-15	1.56109e-13
CG14860	2.58016	4.62435	1.82244	2.53745	0.0111662	0.0330459
CG15068	415.127	2.3516	0.376916	6.23904	4.40265e-10	8.1056e-09
CG15093	293.682	2.04556	0.28051	7.29229	3.04719e-13	8.74874e-12
CG15096	552.393	2.25541	0.797565	2.82787	0.00468584	0.0160064
CG15199	34.6377	3.03655	0.558211	5.43979	5.33439e-08	6.58156e-07
CG15293	1039.42	2.82113	0.326442	8.64206	5.52066e-18	2.90327e-16
CG15347	33.7567	3.24788	0.514461	6.31317	2.73383e-10	5.24214e-09
CG15353	15.5147	2.30758	0.868997	2.65545	0.00792019	0.0249145
CG15497	14.4298	2.04143	0.654387	3.1196	0.00181095	0.00714362
CG15553	21.2738	2.89282	0.68045	4.25133	2.12504e-05	0.000144893
CG1628	159.388	2.08094	0.308871	6.73725	1.61409e-11	3.78509e-10
CG16704	139.449	2.65905	0.961105	2.76665	0.00566348	0.0188304
CG16712	796.431	2.0473	0.716722	2.85647	0.00428377	0.0148957
CG16713	63.8717	2.10052	0.474374	4.42798	9.51185e-06	7.08089e-05
CG16756	56.4716	2.6773	0.375165	7.13631	9.58662e-13	2.62471e-11
CG16898	27.291	2.08532	0.496127	4.20321	2.63161e-05	0.000175821
CG17018	47.8939	2.38694	0.437082	5.46108	4.73256e-08	5.89678e-07
CG17107	4.96807	4.55302	1.59444	2.85556	0.00429607	0.0149092
CG17108	2569.09	5.21523	0.671391	7.76781	7.98567e-15	2.78137e-13
CG17109	29.2057	6.24445	1.16767	5.34778	8.90374e-08	1.04861e-06
CG17119	102.238	2.448	0.264774	9.24564	2.33839e-20	1.64508e-18
CG17224	160.286	2.61452	0.247129	10.5796	3.70535e-26	5.24826e-24
CG17244	148.544	3.09187	0.587284	5.26469	1.40427e-07	1.59376e-06
CG18003	229.398	2.32641	0.31454	7.39625	1.40085e-13	4.23966e-12
CG18190	3.193	4.93	1.80743	2.72763	0.00637905	0.0208314
CG18302	28.4369	2.5148	0.825138	3.04773	0.00230574	0.00881073
CG18446	17.3721	2.31357	0.728714	3.17487	0.00149902	0.00605017
CG18547	89.8312	2.98254	0.420745	7.0887	1.35381e-12	3.59538e-11
CG18754	7.30805	2.47181	0.915975	2.69856	0.0069641	0.0224453
CG1887	202.078	2.73101	0.284303	9.60601	7.54142e-22	6.67605e-20
CG1979	20.3858	2.37685	0.626582	3.79336	0.000148624	0.000812576
CG2065	21.4949	4.80409	0.890107	5.39721	6.7685e-08	8.17996e-07
CG2233	6986.77	3.62918	0.635515	5.7106	1.12576e-08	1.59241e-07
CG2736	565.299	3.87761	0.957723	4.04878	5.14857e-05	0.000320405
CG30002	40.8079	2.6203	0.669626	3.91307	9.1129e-05	0.000530155
CG30026	43.1923	2.69463	0.561721	4.7971	1.60976e-06	1.42981e-05
CG30046	117.958	2.34508	0.283739	8.26494	1.39769e-16	6.13539e-15
CG30083	25.9485	4.07895	0.749744	5.44045	5.31458e-08	6.56474e-07
CG30090	7.87853	3.19411	1.03707	3.07995	0.00207038	0.00804924
CG30151	44.4224	2.46802	0.537863	4.58856	4.46307e-06	3.60816e-05
CG30273	9.07872	2.29353	0.854562	2.68387	0.00727758	0.0232861
CG30380	3.34258	4.99578	1.75004	2.85466	0.00430826	0.0149418
CG30384	40.8936	3.35024	0.654735	5.11695	3.10517e-07	3.22446e-06
CG30431	57.7742	4.74259	0.51728	9.16833	4.80424e-20	3.2715e-18
CG31075	530.163	2.34349	0.240213	9.75587	1.74101e-22	1.62235e-20
CG31205	19.5016	3.77062	0.849923	4.43643	9.14642e-06	6.85207e-05
CG31313	141.173	2.00402	0.473587	4.23158	2.32059e-05	0.000156917
CG31326	282.905	2.57024	0.329568	7.79883	6.24818e-15	2.20513e-13
CG31664	61.3831	4.00991	0.426684	9.39784	5.5696e-21	4.28738e-19
CG31776	22.5764	4.54031	0.820568	5.53313	3.14558e-08	4.10159e-07
CG31777	66.27	2.54812	0.388473	6.55933	5.40499e-11	1.17418e-09
CG31937	224.738	2.01838	0.236631	8.52963	1.46811e-17	7.39136e-16
CG32191	81.9572	2.85121	0.469891	6.06781	1.29666e-09	2.159e-08
CG32444	855.424	2.06638	0.259338	7.9679	1.61397e-15	6.14523e-14
CG3246	256.684	3.43105	0.295405	11.6147	3.46922e-31	8.01164e-29
CG32553	5.86798	2.71619	1.11045	2.44604	0.0144436	0.0407963
CG32695	60.2202	2.30246	0.639491	3.60046	0.000317656	0.00158425
CG33120	128.326	3.20289	0.508627	6.29714	3.03191e-10	5.74117e-09
CG33301	5.35152	5.67541	1.53142	3.70597	0.000210581	0.00110469
CG33307	85.3693	4.37242	1.43546	3.046	0.0023191	0.00883956
CG33460	14.5056	3.03552	0.793019	3.82781	0.000129289	0.000721344
CG33770	3.31208	4.98389	1.69845	2.93437	0.0033423	0.0121029
CG33926	357.197	5.87593	0.403411	14.5656	4.64719e-48	4.48792e-45
CG3397	72.4787	3.03727	0.504983	6.01461	1.80323e-09	2.96528e-08
CG34002	3.40031	3.96002	1.60681	2.46452	0.0137195	0.0391466
CG34010	22.0053	2.43131	0.55944	4.34598	1.38656e-05	9.87891e-05
CG34054	28.141	2.54764	0.771509	3.30215	0.000959463	0.00411813
CG34124	3.5902	5.10064	1.6882	3.02135	0.00251648	0.0094931
CG34166	958.952	3.21133	0.901986	3.56029	0.000370445	0.00180847
CG34291	61.5389	3.62605	0.461976	7.849	4.19383e-15	1.5051e-13
CG34331	177.512	2.40545	0.313147	7.68153	1.57197e-14	5.31637e-13
CG34424	135.078	3.17115	0.303199	10.459	1.33283e-25	1.76983e-23
CG34456	40.1236	8.58251	1.45074	5.91593	3.29996e-09	5.1628e-08
CG3513	23.4756	3.05088	0.652174	4.67801	2.89673e-06	2.43449e-05
CG3597	224.825	2.48996	0.329743	7.5512	4.31274e-14	1.39678e-12
CG3699	166.903	4.96168	0.430588	11.523	1.00983e-30	2.23489e-28
CG3775	297.286	3.6694	0.341487	10.7453	6.23265e-27	9.4585e-25
CG4019	610.245	2.83025	0.383319	7.38353	1.54143e-13	4.59961e-12
CG4095	6.17776	3.16571	1.29789	2.43912	0.0147231	0.0414424
CG42329	7.14296	6.0935	1.57182	3.87671	0.000105877	0.000602585
CG42369	614.786	3.55862	0.246967	14.4093	4.52263e-47	3.69568e-44
CG42370	87.3089	2.32391	0.32641	7.11961	1.0823e-12	2.93299e-11
CG4250	577.037	2.24885	0.205473	10.9447	7.0418e-28	1.18738e-25
CG42715	10.2642	3.61505	1.03009	3.50945	0.000449035	0.00213236
CG42764	26.2901	2.31628	0.523731	4.42266	9.74952e-06	7.22744e-05
CG42807	187.581	3.11639	0.384293	8.10941	5.08661e-16	2.0863e-14
CG4306	90.0339	3.32753	0.483501	6.88214	5.89581e-12	1.45654e-10
CG43064	19.4498	2.40798	0.582937	4.13077	3.61552e-05	0.000234479
CG43071	16.5835	2.89789	0.712233	4.06874	4.72689e-05	0.000297828
CG43085	105.552	5.40241	0.475725	11.3562	6.91104e-30	1.41184e-27
CG43103	57.1702	2.9058	0.53102	5.47211	4.44708e-08	5.57749e-07
CG43114	18.7487	3.63954	0.829865	4.3857	1.15612e-05	8.41773e-05
CG43129	107.993	2.26666	0.338399	6.69819	2.11013e-11	4.86967e-10
CG43134	4.76736	5.51051	2.2886	2.40781	0.0160486	0.0445361
CG43191	12.0651	2.98147	0.87109	3.42269	0.000620043	0.00282328
CG43202	3.39227	3.95688	1.62437	2.43595	0.0148529	0.0417304
CG43236	31.0296	2.59958	0.682601	3.80835	0.000139899	0.000770933
CG4325	21.4702	2.54175	0.578071	4.39695	1.09785e-05	8.03201e-05
CG43293	6.38743	3.29818	1.16308	2.83572	0.00457232	0.0157088
CG4335	99.7515	2.71977	0.626237	4.34303	1.40531e-05	9.98641e-05
CG43402	36.2022	2.66311	0.602288	4.42165	9.79498e-06	7.25102e-05
CG44006	29.7729	2.07909	0.539501	3.85373	0.000116334	0.000655257
CG44014	51.5968	2.27347	0.491252	4.62791	3.69371e-06	3.04259e-05
CG4408	160.55	5.01124	0.406245	12.3355	5.83172e-35	1.77001e-32
CG4586	19.5342	2.44921	0.748354	3.2728	0.00106488	0.00449434
CG4716	1722.78	2.80451	0.608982	4.60524	4.11987e-06	3.35515e-05
CG4721	355.954	2.38078	0.284291	8.37444	5.54865e-17	2.52976e-15
CG4723	52.5934	3.95656	0.470455	8.41008	4.09736e-17	1.96951e-15
CG4725	36.9007	5.26072	0.732207	7.18475	6.73296e-13	1.86747e-11
CG4734	6.04071	5.85107	1.48466	3.94101	8.11406e-05	0.000479664
CG4847	267.59	4.22623	0.385736	10.9563	6.19891e-28	1.07952e-25
CG4927	60.1952	2.04901	0.395732	5.17778	2.24536e-07	2.41178e-06
CG5210	1463.45	3.43405	0.294026	11.6794	1.62418e-31	3.92128e-29
CG5322	192.295	3.59182	0.277744	12.9321	2.96528e-38	1.12501e-35
CG5418	17.2781	3.20605	0.742415	4.3184	1.57162e-05	0.00010991
CG5435	18.5501	2.07489	0.648342	3.20031	0.0013728	0.00561111
CG5493	184.22	2.24591	0.426048	5.27149	1.35318e-07	1.54071e-06
CG5707	114.719	2.51619	0.276517	9.09958	9.06792e-20	5.87369e-18
CG5773	190.836	4.24808	0.520668	8.15891	3.38069e-16	1.43652e-14
CG5778	177.796	3.38141	0.416551	8.11763	4.75382e-16	1.96497e-14
CG5791	63.1166	2.26401	0.436266	5.18952	2.10841e-07	2.29015e-06
CG5819	67.5792	3.50977	0.631708	5.556	2.7603e-08	3.64257e-07
CG5849	27.9999	2.25159	0.517315	4.35245	1.34624e-05	9.64339e-05
CG5945	101.91	2.21071	0.523602	4.22212	2.42015e-05	0.000162923
CG5958	379.355	2.09546	0.309241	6.77614	1.23429e-11	2.93988e-10
CG5999	7.43624	3.59907	1.12756	3.19191	0.00141334	0.00575024
CG6012	12.2114	4.95396	1.207	4.10435	4.05449e-05	0.000259776
CG6034	50.1151	7.93714	1.26394	6.2797	3.39227e-10	6.38939e-09
CG6067	174.162	2.92134	0.91074	3.20765	0.00133823	0.00548883
CG6071	60.8041	3.02837	0.430293	7.03792	1.95135e-12	5.06827e-11
CG6188	351.554	6.93452	0.480283	14.4384	2.96531e-47	2.62504e-44
CG6385	172.203	3.43197	0.494753	6.93675	4.01233e-12	9.95863e-11
CG6409	185.6	2.96816	0.848341	3.49878	0.000467391	0.00220966
CG6415	130.354	3.27658	0.416381	7.86919	3.56949e-15	1.31206e-13
CG6426	310.883	3.15255	0.275858	11.4282	3.02451e-30	6.42588e-28
CG6503	1466.35	3.48723	0.831835	4.19221	2.7625e-05	0.000183988
CG6733	45.9512	7.81123	1.23279	6.33621	2.3549e-10	4.54013e-09
CG6985	67.3734	2.24122	0.317879	7.05054	1.78228e-12	4.66334e-11
CG7091	2.59459	4.63149	1.80459	2.56651	0.0102728	0.0309157
CG7227	84.3527	2.99295	0.512294	5.84224	5.15023e-09	7.77671e-08
CG7296	30.5374	2.42056	0.6606	3.66419	0.00024812	0.00127702
CG7322	237.136	3.77438	0.358857	10.5178	7.15454e-26	9.74394e-24
CG7384	25.8174	2.48507	0.530183	4.68719	2.76983e-06	2.33523e-05
CG7408	65.7756	2.14908	0.469085	4.58142	4.61836e-06	3.71673e-05
CG7470	1059.41	2.65374	0.317595	8.35573	6.50312e-17	2.95225e-15
CG7509	1171.83	2.35438	0.211053	11.1554	6.73799e-29	1.27817e-26
CG7560	69.7161	3.4436	0.377186	9.12971	6.86824e-20	4.58876e-18
CG8036	2212.36	2.03165	0.212672	9.55297	1.26027e-21	1.07103e-19
CG8129	68.946	3.73885	0.44465	8.40854	4.15159e-17	1.98659e-15
CG8317	209.192	2.3684	0.793212	2.98584	0.00282801	0.0104712
CG8358	36.3002	2.8437	0.50416	5.64047	1.69588e-08	2.31559e-07
CG8478	22.1578	2.05093	0.538707	3.80713	0.00014059	0.000774229
CG8539	16.3914	2.54827	0.668261	3.81329	0.000137129	0.00075792
CG8550	36.7348	2.82993	0.454302	6.22919	4.68853e-10	8.60212e-09
CG8586	277.708	2.40741	0.196606	12.2448	1.79015e-34	5.00442e-32
CG8654	152.881	2.03683	0.535751	3.80183	0.000143633	0.000788531
CG8665	72.0811	2.42313	0.794887	3.0484	0.00230067	0.00879452
CG8738	43.1798	2.14935	0.401509	5.35318	8.64218e-08	1.0212e-06
CG8908	31.3291	2.13186	0.485978	4.38674	1.15065e-05	8.38938e-05
CG8925	20.4339	2.59975	0.659933	3.93941	8.16836e-05	0.000481802
CG9119	278.131	2.00357	0.187078	10.7098	9.15725e-27	1.35108e-24
CG9377	1275.71	3.89187	0.35287	11.0292	2.76393e-28	5.06227e-26
CG9451	111.992	2.49105	0.321646	7.74468	9.58194e-15	3.30484e-13
CG9498	128.045	2.44526	0.369507	6.61763	3.65005e-11	8.12883e-10
CG9505	39.224	2.14348	0.586733	3.65325	0.000258945	0.00132439
CG9509	14.6461	2.82931	1.10163	2.56829	0.0102203	0.0307999
CG9510	301.134	2.24726	0.299392	7.50607	6.09311e-14	1.92069e-12
CG9518	14.3656	2.44717	0.711293	3.44045	0.000580741	0.00267413
CG9631	44.9701	2.03904	0.454562	4.48573	7.26663e-06	5.58967e-05
CG9664	126.745	2.19337	0.250414	8.75897	1.97041e-18	1.07895e-16
CG9780	459.14	3.31139	0.736498	4.49612	6.92038e-06	5.34656e-05
CG9914	415.789	2.96891	0.365311	8.12706	4.39837e-16	1.83952e-14
CG9928	243.702	2.70616	1.07573	2.51565	0.0118815	0.0347171
CR17025	59.2247	2.1307	0.448004	4.75598	1.97489e-06	1.71821e-05
CR40976	17.7959	2.91458	0.651976	4.47038	7.8082e-06	5.97167e-05
CR41257	3.52412	4.01642	1.63675	2.45389	0.0141319	0.0400929
CR42646	7.51983	4.27604	1.29866	3.29264	0.000992511	0.00422922
CR43256	27.7182	2.56331	0.495591	5.17223	2.31318e-07	2.47711e-06
CR43417	45.8748	3.85843	0.697891	5.5287	3.2261e-08	4.19705e-07
CR43651	38.0377	2.67315	0.895913	2.98371	0.00284772	0.0105258
CR43855	6.28121	2.8187	1.10798	2.54401	0.0109587	0.0325817
CR43857	9.06661	3.90652	1.06147	3.68031	0.00023295	0.00120655
CR43956	8.36445	3.02787	0.967828	3.12852	0.00175689	0.0069492
CR43973	14.0055	2.52427	0.677971	3.72326	0.000196664	0.00103681
CR44042	11.4077	2.54185	1.01879	2.49498	0.0125966	0.0364118
CR44053	10.1898	4.07469	1.1214	3.63358	0.000279519	0.00141667
CR44065	10.8422	2.79157	0.867218	3.219	0.0012864	0.00529669
CR44181	17.8539	4.87633	0.999706	4.87777	1.07294e-06	9.84271e-06
CR44272	2.44083	4.544	1.84342	2.46499	0.0137017	0.0391271
CR44544	6.88897	3.48916	1.13751	3.06736	0.00215959	0.00833925
CR44603	24.571	3.78211	0.661334	5.71891	1.0721e-08	1.52462e-07
CR44748	7.27007	2.78835	1.08439	2.57136	0.01013	0.0305627
CR44931	2.58071	4.62461	1.83203	2.52431	0.0115927	0.0340191
CR45046	3.73482	5.15745	1.81817	2.83662	0.00455934	0.0156795
CR45171	27.8345	2.64016	0.555603	4.75189	2.01527e-06	1.74904e-05
CR45181	42.5013	4.95277	0.682385	7.25803	3.92779e-13	1.11267e-11
CR45327	17.1733	2.30922	0.616052	3.74841	0.000177958	0.000948543
CR45358	9.17567	2.54829	0.863241	2.95201	0.00315715	0.0115252
CR45381	11.942	2.43521	0.712978	3.41555	0.000636539	0.00288356
CR45403	4.83046	3.54314	1.37649	2.57405	0.0100516	0.0303638
CR45577	4.96718	4.55266	1.55813	2.92187	0.00347936	0.012508
CR45601	37.7938	3.09396	0.696759	4.44051	8.97461e-06	6.74238e-05
Cht8	39.1075	3.94972	0.917626	4.30428	1.6753e-05	0.000116471
Cht9	14.411	5.18739	1.75652	2.95322	0.00314482	0.0114881
Cp18	27.9472	2.24535	0.479756	4.6802	2.86598e-06	2.41246e-05
Cpr47Ef	43.8878	3.08826	0.509139	6.06565	1.31422e-09	2.18481e-08
Cpr72Ec	16.6458	4.42634	1.09618	4.03799	5.39121e-05	0.000333357
Cyp12c1	81.8833	2.16694	0.304598	7.1141	1.12645e-12	3.04485e-11
Cyp309a1	106.336	3.39122	0.441498	7.68117	1.57644e-14	5.31637e-13
Cyp309a2	58.8067	2.80599	0.47791	5.87137	4.3221e-09	6.61581e-08
Cyp312a1	14.295	3.02532	1.17248	2.58027	0.0098722	0.0298952
Cyp4ac1	127.554	3.86423	0.513705	7.52228	5.38294e-14	1.70696e-12
Cyp4ac2	69.6274	5.14278	0.548037	9.38399	6.35232e-21	4.78587e-19
Cyp4d1	22.8613	3.25762	0.671348	4.85236	1.22004e-06	1.11058e-05
Cyp4d14	26.5434	2.44806	0.616502	3.97089	7.16035e-05	0.000431204
Cyp4d2	537.691	2.0571	0.342225	6.01096	1.84431e-09	3.02814e-08
Cyp4d20	60.1221	3.5166	0.438032	8.02818	9.89299e-16	3.83904e-14
Cyp4d21	75.2325	7.04243	1.04017	6.77046	1.28374e-11	3.03723e-10
Cyp4e2	286.669	3.8901	0.411702	9.44882	3.42663e-21	2.7165e-19
Cyp4g1	43.3028	3.37177	0.944792	3.56879	0.00035863	0.00176132
Cyp4p1	39.8517	3.2131	0.626719	5.12685	2.94627e-07	3.07146e-06
Cyp4p2	4.56088	3.43468	1.38877	2.47317	0.0133919	0.0383974
Cyp6a21	20.1637	2.87581	0.704412	4.08256	4.45425e-05	0.000282492
Cyp6a22	52.851	2.16691	0.393919	5.50091	3.77845e-08	4.83015e-07
Cyp6g1	321.014	4.20495	0.780693	5.38618	7.19703e-08	8.66826e-07
Cyp9b1	8.09477	2.79926	1.14574	2.44319	0.014558	0.0410428
Cyp9b2	242.07	3.01377	0.427106	7.05626	1.71042e-12	4.48636e-11
Cyp9c1	96.675	2.00707	0.310504	6.4639	1.02036e-10	2.09657e-09
Cyt-b5-r	1868.92	3.05218	0.857934	3.55759	0.000374272	0.00182229
Dhc62B	19.8797	2.12284	0.585425	3.62615	0.000287679	0.00145386
Drsl4	4.23124	4.31591	1.69007	2.55368	0.0106591	0.0318334
Drsl5	31.3903	2.82582	0.753294	3.75129	0.00017593	0.000939352
Efhc1.2	43.9732	2.44847	0.445585	5.49497	3.90787e-08	4.97165e-07
Ela	344.026	3.14084	0.233597	13.4455	3.27087e-41	1.57939e-38
Est-6	2600.03	3.25389	0.256896	12.6662	9.10381e-37	3.11967e-34
Est-P	2.74086	4.71049	1.77941	2.64722	0.00811556	0.0253862
GNBP2	42.0507	2.04058	0.594097	3.43475	0.000593093	0.00271805
GNBP3	174.087	3.20825	0.358499	8.94911	3.58365e-19	2.20053e-17
Glt	1508.16	2.46567	0.176935	13.9354	3.85937e-44	2.41165e-41
Gr59d	2.45525	4.55154	1.83747	2.47707	0.0132465	0.0380524
GstD9	1550.77	2.11728	0.515138	4.11013	3.9543e-05	0.000253816
GstE9	202.866	3.42432	0.408892	8.37461	5.54048e-17	2.52976e-15
Hayan	34.6131	2.61703	0.488575	5.35646	8.48692e-08	1.00621e-06
Hf	157.605	2.41257	0.320039	7.53835	4.7595e-14	1.5229e-12
Hml	2709.72	3.03032	0.222418	13.6244	2.86674e-42	1.45016e-39
Hn	798.423	2.3786	0.678756	3.50435	0.000457724	0.00216781
Hsp68	107.9	2.14619	0.332545	6.45383	1.0906e-10	2.22797e-09
Hsp70Bb	861.738	7.45328	0.310858	23.9765	4.88905e-127	5.19364e-123
IM14	171.657	2.21255	0.306987	7.20733	5.70583e-13	1.58673e-11
IM4	790.091	2.22864	0.678054	3.28681	0.00101328	0.00430906
Idgf2	573.509	2.42762	0.187637	12.9379	2.75214e-38	1.08281e-35
Idgf5	137.113	2.95262	0.405057	7.28939	3.1136e-13	8.91531e-12
Ir93a	22.1916	2.27277	0.638647	3.55873	0.000372652	0.00181817
Iris	315.562	4.65949	0.35376	13.1713	1.28286e-39	5.92513e-37
Jabba	385.239	3.43293	0.333953	10.2797	8.70056e-25	1.03849e-22
LM408	3193.49	3.0699	0.159963	19.1913	4.37724e-82	1.54998e-78
Lip2	25.7106	3.41404	0.770756	4.42948	9.44623e-06	7.04686e-05
Lsd-1	766.756	2.65824	0.601943	4.4161	1.005e-05	7.42427e-05
Lsp1alpha	205.73	2.81663	1.15566	2.43726	0.0147992	0.041602
Lsp1beta	4420.56	4.72756	1.13317	4.17196	3.01985e-05	0.000199502
Lsp2	14646.8	5.4136	0.983735	5.50312	3.73139e-08	4.78726e-07
Mdr50	30.7395	3.51172	0.609752	5.75925	8.44868e-09	1.22443e-07
Mec2	24.6504	2.16793	0.545337	3.9754	7.02596e-05	0.000424073
Mtk	84.3856	2.73025	0.559651	4.87849	1.069e-06	9.815e-06
Muc14A	48.6359	3.82679	0.534253	7.16288	7.89979e-13	2.17408e-11
NT5E-2	195.646	3.24417	0.228845	14.1763	1.28455e-45	9.09719e-43
NimB1	32.5567	2.20702	0.441017	5.00438	5.6041e-07	5.50207e-06
NimB2	425.193	2.97041	0.188631	15.7471	7.18487e-56	8.48055e-53
NimC1	423.803	2.71656	0.232518	11.6832	1.55246e-31	3.8353e-29
Nnf1b	4.80318	4.50294	1.50686	2.98829	0.00280546	0.0104095
Npc2g	462.236	4.31676	0.871082	4.95563	7.20946e-07	6.90375e-06
Npc2h	141.457	3.23051	0.91749	3.52103	0.000429867	0.00205605
Nplp2	6196.4	3.13809	0.619097	5.06882	4.00294e-07	4.04597e-06
Nplp4	24.5658	4.36638	0.740551	5.89611	3.72163e-09	5.77078e-08
NtR	479.57	2.94013	0.282336	10.4136	2.14954e-25	2.7847e-23
Obp19d	204.29	3.56911	0.967293	3.68979	0.000224442	0.00116589
Obp83cd	49.2927	2.58764	0.522146	4.95578	7.20398e-07	6.90375e-06
Obp83ef	43.6535	3.08676	0.478341	6.45305	1.09619e-10	2.23509e-09
Obp83g	10.3575	2.70778	0.880738	3.07445	0.00210892	0.0081733
Obp99a	190.276	4.63151	1.09929	4.21318	2.51798e-05	0.00016876
Obp99b	3834.02	5.13115	0.932497	5.50259	3.74258e-08	4.79583e-07
Obp99c	1204.08	2.34752	0.240488	9.76148	1.64728e-22	1.54859e-20
Odc1	73.9363	2.67185	0.514998	5.18808	2.12473e-07	2.30317e-06
Odc2	5.22071	3.66054	1.48745	2.46096	0.0138566	0.0394529
Or1a	16.3015	2.0907	0.638073	3.27658	0.00105073	0.00444696
Or67d	6.12123	3.3311	1.29068	2.58089	0.00985464	0.0298505
Ote	29.6025	2.02645	0.446565	4.53786	5.6829e-06	4.47845e-05
P5cr-2	107.672	2.51336	0.404975	6.20621	5.42761e-10	9.8057e-09
PGRP-SB1	121.645	2.61539	0.371197	7.04584	1.84352e-12	4.79993e-11
PGRP-SC2	25.3861	2.7982	0.554419	5.0471	4.48577e-07	4.4786e-06
PH4alphaMP	6.68511	2.62685	1.02352	2.56649	0.0102732	0.0309157
PPO1	1054.91	6.70369	1.09028	6.14858	7.81819e-10	1.366e-08
Phk-3	74.534	2.04353	0.768059	2.66064	0.00779918	0.0246067
Ppn	4058.56	2.62709	0.209396	12.5461	4.17719e-36	1.34468e-33
Prat2	488.142	2.59319	0.432394	5.99728	2.0065e-09	3.28429e-08
Reg-2	84.2307	2.33387	0.493989	4.72454	2.30634e-06	1.97902e-05
Rfabg	30397.1	2.43703	0.272977	8.92759	4.35385e-19	2.61305e-17
Rh2	4462.93	2.0135	0.23967	8.40113	4.42212e-17	2.09715e-15
Rootletin	25.6404	3.82554	0.865738	4.41882	9.92407e-06	7.34146e-05
5-Sep	35.7654	2.32111	0.423793	5.47699	4.32611e-08	5.43861e-07
Ser7	85.7491	3.14544	0.537422	5.85283	4.83271e-09	7.355e-08
Sodh-1	727.739	3.91172	0.612021	6.39148	1.64291e-10	3.22003e-09
Spat	362.29	2.61011	0.352283	7.40911	1.27146e-13	3.89243e-12
Spc25	8.0706	2.60007	0.89632	2.90083	0.00372173	0.0132582
Spn42Dd	161.084	2.03968	0.215452	9.46698	2.88044e-21	2.3181e-19
Spn43Ad	26.5011	2.77756	0.550839	5.04242	4.59689e-07	4.57664e-06
Sr-CI	313.657	2.86426	0.219096	13.0731	4.69104e-39	1.91665e-36
St1	84.0913	2.51312	0.390275	6.43934	1.1999e-10	2.43063e-09
Tal	1125.55	2.27421	0.162183	14.0225	1.135e-44	7.53567e-42
Tequila	2680.69	4.7269	0.232755	20.3085	1.08152e-91	5.74448e-88
TotX	26.3614	4.00245	0.983674	4.06888	4.72405e-05	0.000297825
Tps1	1663.51	2.55879	0.538069	4.7555	1.97953e-06	1.71943e-05
Tsf1	18898.7	2.23721	0.198948	11.2452	2.44491e-29	4.90043e-27
Tsp42Eq	3.19782	3.88878	1.63858	2.37327	0.0176315	0.0479025
UK114	261.972	2.43273	0.335725	7.24618	4.28689e-13	1.20795e-11
Ugt37b1	7.73871	5.2031	1.5195	3.42422	0.000616559	0.00281345
Yp1	32300.8	7.00432	1.16162	6.02978	1.64179e-09	2.704e-08
Yp2	19984.1	6.47683	1.20847	5.35952	8.3443e-08	9.90408e-07
Yp3	26402.7	7.31191	1.24008	5.89631	3.71715e-09	5.77078e-08
Zwilch	4.2795	3.3507	1.37954	2.42886	0.0151464	0.0424427
a10	4.94104	4.53273	1.53705	2.94898	0.00318826	0.0116222
ade5	1537.29	2.13094	0.319046	6.67909	2.40432e-11	5.46919e-10
alpha-Est2	114.036	2.3916	0.327279	7.30753	2.72108e-13	7.89781e-12
alpha-Est5	45.3504	3.90944	0.496078	7.88069	3.2558e-15	1.2051e-13
alpha-Est7	684.024	2.02512	0.214079	9.45967	3.08923e-21	2.46744e-19
comm3	14.1706	2.8639	0.722698	3.96279	7.40777e-05	0.00044384
dgt5	16.3272	2.27014	0.62445	3.63542	0.000277526	0.00140791
dob	94.0373	3.41305	0.465684	7.3291	2.31708e-13	6.76218e-12
eIF4E-6	34.7042	3.55674	0.555534	6.40239	1.52963e-10	3.00356e-09
eater	76.7508	2.50881	0.31898	7.8651	3.688e-15	1.34631e-13
et	50.6159	2.06585	0.358628	5.76043	8.38994e-09	1.21757e-07
fbp	349.882	2.58102	0.322345	8.00703	1.17514e-15	4.53948e-14
fit	1031.3	9.8476	0.790763	12.4533	1.34201e-35	4.19299e-33
fon	631.528	2.20951	0.334836	6.5988	4.14511e-11	9.16567e-10
frma	96.8041	2.11022	0.532952	3.9595	7.51057e-05	0.000448733
fs(1)Yb	13.8935	2.21893	0.680355	3.26143	0.00110851	0.00465443
ftz	11.4	3.23527	0.875781	3.69415	0.000220625	0.00114831
lectin-24Db	105.373	2.46694	0.294367	8.38051	5.27003e-17	2.43367e-15
lectin-28C	389.314	2.58317	0.30745	8.40191	4.39261e-17	2.0925e-15
lok	29.1082	2.66202	0.492624	5.40375	6.52632e-08	7.92233e-07
mthl3	8.33177	2.22448	0.850349	2.61596	0.0088977	0.0273259
mthl4	7.24306	3.09705	1.07105	2.89162	0.00383264	0.0136031
nAChRbeta3	215.145	2.48645	0.351916	7.06547	1.60071e-12	4.20899e-11
p38c	6.08344	5.86014	1.4981	3.91172	9.16409e-05	0.00053255
pgant4	30.6849	4.76248	0.820958	5.80113	6.58711e-09	9.75939e-08
piwi	44.2573	2.37985	0.416892	5.70855	1.13943e-08	1.6096e-07
psh	56.7146	2.03601	0.484307	4.20397	2.62271e-05	0.000175337
pug	950.189	2.81806	0.358365	7.86365	3.73101e-15	1.35735e-13
regucalcin	1997.03	2.14387	0.228437	9.38497	6.29358e-21	4.77548e-19
rost	216.551	2.3876	0.480071	4.97342	6.57825e-07	6.38181e-06
smp-30	208.887	3.69546	0.2898	12.7518	3.04709e-37	1.07898e-34
snoRNA:2R:9445205	12.9985	2.738	0.811929	3.37222	0.000745648	0.0033018
snoRNA:2R:9445410	10.9922	4.09617	1.17516	3.48562	0.000490993	0.00230584
snoRNA:Psi28S-1153	13.8719	2.63324	0.785767	3.35117	0.000804716	0.00352806
ssp7	357.252	2.42836	0.284079	8.54816	1.25067e-17	6.3266e-16
sta	10263.8	2.11443	0.136043	15.5423	1.79306e-54	1.90476e-51
sxe2	112.112	6.17017	0.710154	8.68849	3.67281e-18	1.96062e-16
tobi	1351.53	6.61492	0.921996	7.17456	7.25413e-13	2.00157e-11
v	152.073	3.73444	0.464311	8.04296	8.76959e-16	3.45035e-14
w	3974.49	2.75299	0.173972	15.8243	2.1144e-56	3.20876e-53

## Sheet: Brain_Transcriptome_down
id	baseMean	log2FoldChange	lfcSE	stat	pvalue	padj
Acp1	32.045	-6.79353	1.36835	-4.96476	6.87869e-07	6.63088e-06
Act57B	744.089	-2.67575	0.270447	-9.89381	4.42836e-23	4.612e-21
Act87E	89.3176	-2.11924	0.474339	-4.46778	7.90351e-06	6.03095e-05
Act88F	30.8989	-2.75221	0.689411	-3.99212	6.54849e-05	0.000397512
Ama	88.0812	-3.00077	0.488014	-6.14895	7.79982e-10	1.36503e-08
CBP	88.394	-2.05321	0.453657	-4.52592	6.01345e-06	4.70751e-05
CG10062	41.7164	-2.67227	0.684002	-3.90681	9.35217e-05	0.000541407
CG10211	12.7219	-2.0611	0.714715	-2.88381	0.00392891	0.0138753
CG10936	1643.86	-2.04331	0.169859	-12.0295	2.48805e-33	6.77707e-31
CG11159	34.9016	-3.19041	0.787325	-4.05221	5.07351e-05	0.00031629
CG1124	75.2242	-2.03308	0.671633	-3.02706	0.00246941	0.00933211
CG11380	3.72375	-4.51809	1.71241	-2.63844	0.00832884	0.0258932
CG11413	462.117	-4.71858	0.834896	-5.6517	1.58865e-08	2.18321e-07
CG11635	19.7432	-3.11458	1.20852	-2.5772	0.00996053	0.0301198
CG11852	65.3805	-4.97612	0.758895	-6.55706	5.48802e-11	1.18978e-09
CG11905	3.64193	-4.49054	1.61841	-2.77467	0.00552582	0.018442
CG12105	42.5282	-2.27069	0.457122	-4.96736	6.78706e-07	6.55445e-06
CG12119	5.59385	-3.55811	1.30756	-2.72118	0.00650497	0.0211581
CG12268	18.8274	-4.1454	1.02642	-4.03869	5.37511e-05	0.000332556
CG13043	8.10885	-5.671	1.60894	-3.52468	0.000424002	0.00203165
CG13067	264.37	-2.08166	0.338228	-6.15461	7.52647e-10	1.32155e-08
CG13188	20.8788	-2.47443	0.581321	-4.25657	2.07586e-05	0.000141813
CG13482	15.1866	-4.32363	0.981232	-4.40633	1.05138e-05	7.71857e-05
CG13606	234.625	-3.96992	1.09599	-3.62222	0.000292086	0.00147333
CG13640	9.15433	-4.95325	1.25941	-3.93298	8.38977e-05	0.000493491
CG13722	45.9065	-3.10044	0.858217	-3.61265	0.000303085	0.00152159
CG13748	6.14914	-3.28073	1.15368	-2.84372	0.00445898	0.0153692
CG14118	20.4812	-2.89652	0.838847	-3.45297	0.000554444	0.00256862
CG14132	24.4705	-2.00555	0.576686	-3.47772	0.000505704	0.0023676
CG14443	10.9185	-3.53732	1.43942	-2.45747	0.0139919	0.0397798
CG14565	18.8939	-5.0023	1.18774	-4.21161	2.53561e-05	0.000169835
CG15213	6.84401	-2.77521	1.01825	-2.72546	0.00642117	0.0209304
CG15822	17.529	-2.63021	1.07189	-2.45381	0.0141352	0.0400929
CG15831	56.6139	-2.97582	0.474341	-6.2736	3.52783e-10	6.59792e-09
CG1673	794.553	-2.00755	0.813277	-2.46847	0.0135691	0.038828
CG16786	11.7478	-3.93351	0.938605	-4.19081	2.77964e-05	0.000185013
CG16884	70.3263	-4.71488	0.789592	-5.97129	2.35386e-09	3.78865e-08
CG16885	62.4592	-4.53307	0.70287	-6.44937	1.12315e-10	2.2813e-09
CG16886	18.5594	-4.96318	1.18129	-4.20149	2.65168e-05	0.00017694
CG17298	9.33604	-6.88126	1.90499	-3.61223	0.000303574	0.0015226
CG17707	5.59598	-5.13132	1.55791	-3.29371	0.000988732	0.00421819
CG2111	24.6464	-3.46867	1.18169	-2.93535	0.00333167	0.0120752
CG2209	7.75182	-2.97495	1.13562	-2.61966	0.00880168	0.0270858
CG31036	21.862	-2.34369	0.937801	-2.49913	0.0124499	0.0360565
CG32170	87.1183	-2.75325	0.692348	-3.97669	6.98803e-05	0.000422263
CG32232	13.4477	-3.03873	1.27479	-2.38372	0.0171388	0.046887
CG32984	12.0465	-2.88576	1.07971	-2.67272	0.00752385	0.0239227
CG33483	8.42789	-2.27746	0.899477	-2.53198	0.011342	0.0334339
CG34030	12.0862	-2.56119	0.899122	-2.84855	0.00439193	0.0151923
CG34398	162.319	-2.13158	0.472256	-4.51361	6.37343e-06	4.96735e-05
CG3713	31.2715	-4.23769	0.834669	-5.07709	3.83258e-07	3.88117e-06
CG3777	91.7854	-2.12356	0.730652	-2.90639	0.00365628	0.0130602
CG40155	27.157	-3.23237	0.562332	-5.74816	9.02193e-09	1.30041e-07
CG4017	14.7855	-6.56569	1.72003	-3.8172	0.000134976	0.000747188
CG40198	46.5887	-5.98338	1.02754	-5.82302	5.77934e-09	8.62812e-08
CG40204	14.2293	-2.71582	0.669563	-4.0561	4.98989e-05	0.000312176
CG4115	43.3758	-2.45191	0.718942	-3.41044	0.000648582	0.00292688
CG41281	6.73411	-2.50274	0.989579	-2.5291	0.0114356	0.0336464
CG41518	10.1277	-2.76219	0.80975	-3.41117	0.000646857	0.00292034
CG41527	12.8084	-2.81916	0.780941	-3.60996	0.000306246	0.00153272
CG42237	21.894	-3.30277	0.886885	-3.72402	0.000196078	0.00103577
CG42323	18.0027	-2.56941	0.947752	-2.71106	0.00670689	0.0216953
CG42621	21.845	-2.1853	0.634503	-3.44412	0.000572921	0.00264385
CG42623	32.7543	-3.628	0.551534	-6.57801	4.76778e-11	1.04645e-09
CG42624	31.7855	-2.35141	0.472992	-4.97134	6.64914e-07	6.43641e-06
CG42749	14.133	-2.86958	1.08957	-2.6337	0.00844612	0.0261965
CG42810	9.90873	-3.11524	1.21817	-2.55732	0.0105482	0.0315378
CG43695	6.21626	-2.64026	1.02943	-2.56478	0.0103241	0.0310247
CG4374	14.2455	-2.73253	1.07751	-2.53598	0.0112134	0.0331411
CG45062	9.45465	-2.4713	0.899169	-2.74843	0.00598821	0.0197432
CG4661	19.1406	-2.65954	1.11534	-2.3845	0.0171024	0.0468244
CG4998	5.42422	-3.04303	1.27554	-2.38568	0.0170474	0.0467581
CG5639	18.6971	-2.06964	0.81476	-2.54018	0.0110795	0.0328348
CG5697	11.3426	-3.588	1.31873	-2.72081	0.00651228	0.0211691
CG5718	7.22416	-4.56207	1.90573	-2.39387	0.0166715	0.0459407
CG5873	13.9792	-6.48587	1.67306	-3.87665	0.000105905	0.000602585
CG6602	5.56026	-4.19682	1.32586	-3.16535	0.00154894	0.00622095
CG7203	538.797	-5.45544	1.02226	-5.33663	9.46917e-08	1.10418e-06
CG7214	52.1687	-5.47268	0.85124	-6.42907	1.28389e-10	2.55887e-09
CG7365	23.4122	-2.92933	0.908474	-3.22445	0.00126215	0.00521501
CG7778	231.233	-3.19813	1.29859	-2.46278	0.0137866	0.0393063
CG7884	5.30023	-6.06849	1.68088	-3.61031	0.000305834	0.00153177
CG7896	7.98345	-2.17744	0.911525	-2.38878	0.0169043	0.0464616
CG8100	7.56517	-2.68476	1.12634	-2.38363	0.0171429	0.046887
CG8630	343.833	-2.22303	0.384246	-5.78543	7.23281e-09	1.06419e-07
CG8736	91.0219	-2.71138	0.530315	-5.11278	3.1746e-07	3.28052e-06
CG8785	86.4188	-2.71025	0.494599	-5.47969	4.26076e-08	5.36916e-07
CG8927	39.3052	-2.1018	0.728004	-2.88708	0.00388841	0.0137554
CG9083	5.90996	-2.84057	1.20378	-2.35971	0.0182891	0.0493736
CG9521	13.9972	-2.25084	0.72675	-3.09714	0.00195398	0.007651
CG9701	45.7001	-2.25883	0.866336	-2.60734	0.00912493	0.027943
CR42875	69.1148	-2.61676	0.329538	-7.9407	2.01045e-15	7.5734e-14
CR43787	11.1541	-3.54281	1.47635	-2.39971	0.0164079	0.0453436
CR44092	12.5722	-4.01561	1.23916	-3.24058	0.00119289	0.00496554
CR44444	5.05294	-2.95695	1.10693	-2.67131	0.00755558	0.0240092
CR44492	3.52521	-5.45478	2.15917	-2.52633	0.0115262	0.0338614
CR44989	9.54219	-3.07498	0.865692	-3.55204	0.000382251	0.00185757
CR45030	8.11648	-3.34745	1.40267	-2.38648	0.0170104	0.0466807
CR45347	25.4165	-3.03825	1.14826	-2.64595	0.00814614	0.0254369
Cad99C	30.1003	-2.02452	0.552182	-3.6664	0.000245989	0.00126718
Cda4	14.8159	-6.56922	1.37324	-4.78374	1.72065e-06	1.51563e-05
Cht5	646.738	-5.71417	1.26058	-4.53298	5.8157e-06	4.56616e-05
Cht7	12.679	-3.5062	1.2789	-2.74157	0.00611456	0.0200912
Cpr100A	62.6555	-4.21294	0.861784	-4.88863	1.01541e-06	9.36341e-06
Cpr49Ac	22.0601	-7.13818	1.58332	-4.50835	6.53324e-06	5.07329e-05
Cpr49Ae	68.0038	-2.0336	0.646044	-3.14778	0.00164517	0.00654309
Cpr62Bb	108.816	-2.96302	0.563011	-5.2628	1.41875e-07	1.60504e-06
Cpr62Bc	7.46929	-4.63905	1.46166	-3.17382	0.00150445	0.0060698
Cpr97Ea	16.8119	-3.24884	0.812603	-3.99806	6.38636e-05	0.000389289
Cpr97Eb	26.0554	-3.34413	0.928419	-3.60196	0.000315825	0.0015766
Cry	26.1946	-5.91385	2.28351	-2.58981	0.00960294	0.0291796
Cyp4ac3	473.221	-3.16584	0.365515	-8.6613	4.66415e-18	2.47736e-16
Drs	297.262	-2.28406	0.481856	-4.74013	2.13579e-06	1.83564e-05
Eh	40.449	-4.26397	0.994171	-4.28897	1.79501e-05	0.000124143
Fbp1	230.784	-6.30936	1.23047	-5.12759	2.93471e-07	3.06543e-06
Fbp2	119.454	-9.58878	1.84266	-5.20376	1.95295e-07	2.13471e-06
Gasp	113.399	-2.792	0.309178	-9.03039	1.71061e-19	1.07525e-17
Ir47a	55.6603	-2.70098	0.613968	-4.39922	1.08641e-05	7.96478e-05
Kah	9.40518	-2.48377	0.869367	-2.85699	0.00427685	0.0148817
Lcp4	4.43329	-5.78748	2.12225	-2.72705	0.0063904	0.0208493
Lsp1gamma	152.713	-7.72389	1.58686	-4.86739	1.13082e-06	1.0338e-05
Mhc	1215.02	-2.1849	0.182374	-11.9803	4.50546e-33	1.16735e-30
Mlc1	193.483	-2.44903	0.214982	-11.3918	4.59368e-30	9.56836e-28
Mlc2	643.152	-2.05385	0.199236	-10.3087	6.43853e-25	7.77233e-23
Mmp1	1082.85	-2.55972	0.943608	-2.7127	0.00667377	0.0216145
Myo28B1	66.5411	-2.09444	0.358584	-5.84087	5.19303e-09	7.8249e-08
NimC4	75.1065	-4.19973	0.458186	-9.166	4.90897e-20	3.32153e-18
Nplp3	689.637	-3.42783	1.12355	-3.0509	0.00228155	0.00874034
Obp85a	10.9808	-4.59984	1.53995	-2.987	0.00281732	0.0104389
Osi12	3.17921	-5.32279	1.74678	-3.04721	0.00230978	0.00881985
Pxd	23.7994	-6.35545	1.36833	-4.64468	3.40596e-06	2.83111e-05
Sclp	54.8988	-3.67133	0.614013	-5.97924	2.24186e-09	3.62206e-08
Skeletor	31.6894	-2.00865	0.61521	-3.26499	0.00109469	0.00460732
Spn43Aa	14.4639	-2.50976	0.948194	-2.64688	0.00812378	0.025397
Swim	63.6553	-2.34294	0.37772	-6.20285	5.54485e-10	1.00005e-08
TpnC25D	115.417	-2.80837	0.294358	-9.54064	1.41949e-21	1.18734e-19
TwdlT	11.7571	-2.67657	0.71706	-3.7327	0.00018944	0.0010037
b	272.591	-2.64266	0.755046	-3.5	0.000465264	0.00220058
b6	4.3729	-3.82074	1.41472	-2.70071	0.00691923	0.0223278
d	15.377	-3.4458	0.874696	-3.93942	8.16771e-05	0.000481802
e	2238.08	-2.01134	0.675321	-2.97835	0.00289806	0.0106797
ect	29.7619	-2.05916	0.608938	-3.38156	0.000720753	0.00320797
kkv	20.1599	-3.4216	0.845816	-4.04532	5.22514e-05	0.000324221
lox2	16.0605	-3.06824	0.899357	-3.41159	0.000645846	0.00291826
mtsh	43.2589	-2.87442	0.410137	-7.00844	2.40988e-12	6.21363e-11
obst-B	5.63912	-3.14415	1.11874	-2.81045	0.00494727	0.0167907
ple	2782.33	-2.56974	0.842885	-3.04874	0.002298	0.00878749
ppk27	6.10129	-4.30549	1.58351	-2.71896	0.00654875	0.0212743
prc	42.1587	-3.08548	0.571268	-5.4011	6.62338e-08	8.01369e-07
spz3	14.724	-2.13854	0.675888	-3.16405	0.0015559	0.00623947
t-cup	12.911	-4.4035	1.19033	-3.69939	0.000216115	0.00112871
tn	212.994	-2.32328	0.440815	-5.27042	1.36112e-07	1.5481e-06
verm	53.6649	-3.46165	0.624603	-5.54217	2.98746e-08	3.90835e-07
yellow-d2	5.12918	-5.99818	1.69476	-3.53926	0.000401256	0.00193488

## Sheet: Brain_Transcriptome_unchanged
id	baseMean	log2FoldChange	lfcSE	stat	pvalue	padj
140up	166.059	0.0853616	0.238709	0.357597	0.720645	0.816229
312	199.757	0.0396987	0.182692	0.217299	0.827975	0.891956
4E-T	2250.91	-0.137283	0.14568	-0.94236	0.346008	0.490714
5.8SrRNA:CR40454	9.81478	1.57213	0.728271	2.15872	0.0308721	0.0758451
7B2	7367.69	0.196837	0.139095	1.41512	0.157032	0.2755
A16	210.872	0.126993	0.308535	0.4116	0.680633	0.785327
ABCB7	934.706	0.190261	0.144734	1.31455	0.188661	0.316161
ACC	5632.99	-0.183858	0.130133	-1.41285	0.1577	0.276215
AGBE	974.635	-0.041778	0.122134	-0.342068	0.732299	0.823801
AGO3	7.73775	1.65098	0.987521	1.67184	0.0945555	0.186012
AIF	653.065	0.0316676	0.137413	0.230455	0.817738	0.885528
ALiX	1748.17	-0.089143	0.139807	-0.637615	0.523725	0.65786
AMPKalpha	2249.84	-0.274867	0.14578	-1.8855	0.0593627	0.129038
AP-1gamma	2354.29	-0.0242432	0.158413	-0.153038	0.878368	0.925502
AP-1mu	685.078	0.0645939	0.125749	0.513674	0.60748	0.728523
APC10	100.141	0.391812	0.248413	1.57726	0.114736	0.216299
APC4	187.254	0.00863923	0.192871	0.0447929	0.964272	0.977896
APC7	19.8917	1.05311	0.5404	1.94875	0.0513248	0.114888
APP-BP1	468.974	0.00198336	0.201638	0.00983628	0.992152	0.994774
AQP	5.04005	-1.08599	1.05933	-1.02516	0.305285	0.447847
ATP7	610.385	0.0699701	0.117698	0.59449	0.552185	0.681954
ATPsyn-Cf6	2020.25	-0.125562	0.108432	-1.15799	0.24687	0.383722
ATPsyn-b	3796.65	-0.0460267	0.136634	-0.336862	0.736221	0.826294
ATbp	160.821	-0.126205	0.200705	-0.628811	0.529473	0.661985
Aatf	213.767	0.35488	0.189593	1.8718	0.0612337	0.132175
Aats-ala-m	377.342	-0.0012751	0.153087	-0.00832922	0.993354	0.995604
Aats-arg	255.603	0.128672	0.169461	0.759302	0.447672	0.589662
Aats-asn	658.29	0.343719	0.178668	1.92378	0.0543816	0.120303
Aats-glupro	966.591	0.188885	0.13718	1.37691	0.16854	0.29046
Aats-gly	507.65	0.208445	0.12526	1.6641	0.0960932	0.188235
Aats-his	554.917	0.131859	0.210204	0.627292	0.530468	0.663116
Aats-ile	834.006	-0.0580039	0.127823	-0.453784	0.649984	0.763043
Aats-leu	418.666	0.082261	0.138584	0.593583	0.552791	0.682191
Aats-lys	716.892	0.303625	0.149349	2.03299	0.0420535	0.0979037
Aats-met	174.088	0.401901	0.202141	1.98823	0.0467868	0.106543
Aats-phe	571.81	0.206345	0.145053	1.42255	0.154868	0.272704
Aats-pro	119.05	0.437046	0.224222	1.94917	0.0512751	0.114818
Aats-ser	259.308	0.276722	0.145741	1.89873	0.0576001	0.126136
Aats-thr	1350.74	-0.00375792	0.1336	-0.0281281	0.97756	0.986261
Aats-tyr	582.131	-0.263127	0.149389	-1.76136	0.0781778	0.160294
Aats-tyr-m	142.213	0.143754	0.206287	0.696865	0.485887	0.625722
Aats-val	720.089	0.236297	0.165633	1.42664	0.153685	0.271105
Abi	818.988	-0.207495	0.107475	-1.93063	0.0535292	0.118813
Abp1	636.361	-0.264632	0.114357	-2.31407	0.0206636	0.054686
Ac78C	662.634	-0.426081	0.189767	-2.24528	0.0247502	0.0632935
Acn	3142.25	-0.093808	0.225246	-0.416468	0.677067	0.78277
Acp36DE	2.62641	0.684944	1.36069	0.503381	0.614697	0.734723
Acp53C14c	3.25669	-1.12319	1.26309	-0.889237	0.373876	0.518835
Acph-1	242.661	0.204664	0.153372	1.33443	0.182063	0.308068
Act5C	17001.1	-0.155145	0.0966756	-1.6048	0.108539	0.207301
Actn	998.127	-0.109409	0.152737	-0.716327	0.473789	0.614088
Acyp2	206.937	0.0865353	0.174456	0.496028	0.619875	0.738635
AdSS	1514.01	-0.159611	0.162263	-0.983656	0.325285	0.469115
Ada	11.4186	0.542092	0.634699	0.854093	0.393053	0.537857
Ada1-1	12.6655	0.317032	0.604729	0.524254	0.600102	0.722694
Ada1-2	16.7327	0.115761	0.569062	0.203424	0.838804	0.898882
Ada2a	265.147	0.0723868	0.198731	0.364246	0.715674	0.812414
Adam	947.231	0.394592	0.169311	2.33058	0.0197755	0.0526132
AdamTS-A	130.756	-0.717384	0.393697	-1.82218	0.0684283	0.144057
Adf1	794.875	-0.0427198	0.131816	-0.324087	0.745872	0.833546
Adh	17.5677	0.57579	0.519499	1.10836	0.267708	0.407256
Adk1	1123.19	0.0225395	0.157046	0.143521	0.885879	0.930186
Adk2	982.476	0.185562	0.123992	1.49656	0.134508	0.24392
Adk3	250.462	0.0457577	0.219656	0.208315	0.834983	0.896233
AdoR	275.607	-0.164855	0.153213	-1.07599	0.281932	0.42376
Ag5r	156.043	-0.957501	1.37028	-0.698764	0.484699	0.624495
Ag5r2	3.03518	0.710844	1.19176	0.596465	0.550865	0.680842
Ahcy89E	76.8669	-0.85777	0.462464	-1.85478	0.0636273	0.136163
Ak6	76.843	0.538147	0.267845	2.00917	0.0445191	0.102387
Akap200	2463.36	0.152893	0.200806	0.761398	0.44642	0.588888
Akt1	1082.39	-0.311702	0.141912	-2.19644	0.0280602	0.0701539
Alas	1177.8	0.159293	0.110257	1.44475	0.148529	0.264247
Ald	17389.6	-0.189314	0.112554	-1.68198	0.0925732	0.182721
Aldh-III	1302.53	-0.134397	0.103964	-1.29273	0.196105	0.325555
Alg-2	617.982	0.226612	0.145166	1.56106	0.11851	0.222033
Alg10	118.994	0.20718	0.213054	0.972429	0.330837	0.474994
Alr	163.643	0.132604	0.205849	0.64418	0.519459	0.654673
Amnionless	57.148	0.529741	0.327607	1.617	0.105878	0.202949
Ance	304.524	-0.192261	0.210166	-0.914804	0.360295	0.505269
Ance-3	25.0836	-0.021663	0.582627	-0.0371816	0.97034	0.981801
Ank	10763.4	-0.195351	0.146503	-1.33342	0.182393	0.308431
Ant2	28.6253	-0.544479	0.50472	-1.07878	0.280688	0.422463
Antp	30.6163	-0.262155	0.42695	-0.614018	0.539203	0.670642
AnxB10	1368.41	-0.105653	0.291251	-0.362756	0.716788	0.813334
AnxB11	562.807	0.248493	0.152269	1.63194	0.102692	0.198022
Aos1	240.503	0.434029	0.188551	2.30192	0.0213398	0.0560151
Apc	5541.62	-0.340295	0.168701	-2.01715	0.0436796	0.100934
Apc2	7.69708	0.678386	0.765257	0.886482	0.375358	0.520416
Apf	85.8343	0.0403501	0.232004	0.17392	0.861928	0.913981
Aplip1	4169.48	-0.139219	0.0787103	-1.76876	0.0769347	0.158418
Arf102F	928.076	0.0517157	0.146559	0.352865	0.724189	0.818759
Arf51F	1758.43	-0.0681544	0.0889139	-0.766522	0.443366	0.586535
Arf79F	4031.62	-0.00148711	0.0982501	-0.0151359	0.987924	0.992419
ArfGAP1	617.843	0.324303	0.149928	2.16306	0.0305365	0.0752119
ArfGAP3	667.787	0.188918	0.137326	1.37569	0.168918	0.290828
Arfip	644.455	0.0568867	0.111093	0.512062	0.608608	0.729794
Arfrp1	142.054	-0.0802894	0.198058	-0.405384	0.685195	0.789239
Arl1	236.866	0.265185	0.222076	1.19412	0.232432	0.367748
Arl2	175.371	0.0839957	0.191938	0.437619	0.661662	0.771317
Arl4	1698.22	-0.0634201	0.118612	-0.534683	0.592869	0.716338
Arl6	6.74281	-0.511321	1.12748	-0.453509	0.650182	0.763192
Arp1	1152.5	-0.365744	0.172264	-2.12315	0.033741	0.0817588
Arp10	285.273	0.267581	0.210918	1.26865	0.204566	0.335248
Arp2	1527.9	0.0749587	0.101211	0.740618	0.458925	0.600428
Arp5	268.379	0.30142	0.211115	1.42775	0.153363	0.270627
Arpc2	567.572	0.0989825	0.112459	0.880164	0.378771	0.523848
Arpc3A	329.299	-0.294216	0.182477	-1.61234	0.106888	0.204663
Arpc3B	10.0907	0.884291	0.847085	1.04392	0.296522	0.439078
Arpc5	220.365	0.416164	0.228258	1.82322	0.0682699	0.143838
Art1	303.354	-0.198159	0.146578	-1.3519	0.176409	0.300753
Art2	8.35752	1.01911	0.798813	1.27578	0.202033	0.332149
Art8	52.9833	0.492853	0.325819	1.51266	0.130367	0.23828
Asciz	132.936	-0.150459	0.211809	-0.710352	0.477486	0.617823
Asph	230.819	-0.422432	0.258712	-1.63283	0.102505	0.197733
AstA	1227.01	0.0405076	0.156204	0.259325	0.795384	0.870799
AstA-R2	16.5643	-0.609348	0.607511	-1.00303	0.315849	0.458785
AstCC	28.3634	-1.33056	0.634934	-2.09558	0.0361193	0.0861809
Atac1	79.8085	0.551888	0.25604	2.15548	0.0311246	0.0763596
Atac2	170.787	0.296957	0.175172	1.69523	0.0900323	0.178936
Atac3	261.194	0.135249	0.160436	0.843008	0.399224	0.543155
Ate1	635.113	0.0388541	0.141299	0.274978	0.783333	0.861691
Atf-2	154.479	0.0318091	0.18276	0.174048	0.861827	0.913965
Atf3	780.039	-0.232502	0.168856	-1.37693	0.168535	0.29046
Atf6	2144.54	0.0328909	0.151499	0.217104	0.828127	0.89203
Atg10	39.0617	-0.364679	0.353744	-1.03091	0.302582	0.445137
Atg12	214.081	0.37411	0.197703	1.89229	0.0584528	0.127478
Atg13	481.252	-0.205775	0.137767	-1.49364	0.13527	0.245008
Atg14	396.628	-0.0361272	0.168031	-0.215003	0.829765	0.893409
Atg4a	432.609	0.326874	0.144515	2.26186	0.023706	0.0611384
Atg4b	520.665	-0.0935726	0.125652	-0.744698	0.456454	0.598626
Atg5	302.394	-0.344199	0.172132	-1.99962	0.0455409	0.104173
Atg6	346.837	-0.347111	0.163261	-2.12612	0.0334936	0.0812705
Atg7	255.025	-0.0138389	0.155339	-0.089088	0.929012	0.957216
Atox1	1632.77	-0.243599	0.151868	-1.60402	0.108709	0.207476
AttA	13.4061	-0.442126	0.693247	-0.637761	0.523629	0.65786
AttB	15.1904	0.755502	1.04035	0.726201	0.467715	0.608442
AttC	120.959	0.620237	0.453197	1.36858	0.17113	0.293971
AttD	3.40585	-0.174778	1.41463	-0.123551	0.901671	0.939248
Atx-1	3.3348	1.23118	1.37116	0.897909	0.369234	0.514207
Atxn7	523.021	-0.0436804	0.143728	-0.303909	0.761197	0.844461
Aven	103.765	-0.468095	0.234209	-1.99862	0.0456495	0.104354
Awh	145.568	-0.290247	0.234544	-1.23749	0.215903	0.348404
Axn	1435.66	-0.0815953	0.142723	-0.571704	0.567523	0.694318
Axs	115.795	0.401512	0.266944	1.5041	0.132555	0.241366
Axud1	836.369	-0.200453	0.146044	-1.37256	0.169891	0.292205
B-H1	29.5924	-0.389431	0.395436	-0.984815	0.324715	0.46842
B-H2	22.0299	-0.840501	0.535032	-1.57094	0.116197	0.218626
B52	5529.67	-0.176639	0.132052	-1.33765	0.18101	0.306678
BBS1	2.61661	0.597215	1.49141	0.400436	0.688835	0.791594
BBS4	5.43042	1.13838	0.983106	1.15795	0.246886	0.383722
BCAS2	96.9263	0.574663	0.251464	2.28527	0.0222973	0.0580976
BCL7-like	177.153	0.0153859	0.181943	0.0845645	0.932608	0.959073
BEAF-32	420.887	0.310015	0.171954	1.80289	0.0714048	0.149141
BHD	134.206	-0.0904801	0.23431	-0.386155	0.699382	0.79939
BM-40-SPARC	2868.18	-0.151696	0.163912	-0.925474	0.354719	0.500024
BTBD9	388.017	0.0717925	0.132923	0.540105	0.589125	0.713356
Bacc	15501.8	0.00661217	0.101294	0.0652768	0.947954	0.968774
Bace	3.97929	-1.82775	1.12408	-1.626	0.103951	0.200012
Baldspot	3329.61	-0.0629598	0.133965	-0.469971	0.638376	0.753577
Bap170	569.434	-0.0159192	0.177159	-0.0898584	0.9284	0.956956
Bap55	322.821	0.217993	0.14736	1.47932	0.139054	0.250707
Bdbt	190.091	0.335794	0.20685	1.62337	0.104511	0.200872
Best1	570.516	-0.148568	0.141803	-1.04771	0.294774	0.437443
Best2	38.4657	0.0400427	0.375584	0.106614	0.915095	0.947788
Bet1	161.773	0.387505	0.209487	1.84978	0.0643454	0.137395
Bet3	473.822	-0.0319386	0.131205	-0.243425	0.807676	0.879029
Bet5	219.488	-0.16111	0.237229	-0.679135	0.497052	0.63609
Bin1	136.863	0.597621	0.282755	2.11356	0.0345526	0.0832507
Bka	94.6178	0.0911138	0.266404	0.342013	0.732341	0.823801
Blm	171.304	-0.152542	0.189275	-0.805929	0.420284	0.564227
Blos1	195.57	-0.0279017	0.183905	-0.151718	0.879409	0.926091
Blos2	112.148	-0.12798	0.23224	-0.551067	0.581588	0.706727
Blos3	92.3824	-0.233558	0.325465	-0.717611	0.472997	0.61336
Blos4	105.497	-0.30418	0.236775	-1.28468	0.198904	0.328916
BoYb	2.54186	-1.80987	1.62291	-1.1152	0.264764	0.403702
Br140	502.561	0.130667	0.145963	0.895205	0.370677	0.515812
Brca2	282.099	-0.0265556	0.184422	-0.143993	0.885506	0.929907
Brd8	225.616	0.259172	0.193534	1.33915	0.180521	0.306044
Bre1	1029.6	0.0347851	0.153784	0.226194	0.82105	0.887551
Brf	492.723	0.151491	0.134858	1.12334	0.261294	0.399815
Brms1	303.658	0.154079	0.190318	0.809588	0.418177	0.561889
Bsg25D	1081.83	-0.146102	0.122092	-1.19665	0.231444	0.366631
BtbVII	2533.42	-0.18794	0.118595	-1.58473	0.113028	0.213837
Btk29A	738.14	-0.0392302	0.139966	-0.280284	0.779259	0.858855
Bub1	487.086	-0.164828	0.15144	-1.08841	0.276415	0.417333
Bub3	274.935	0.0767557	0.168363	0.455895	0.648465	0.761513
BubR1	126.489	-0.330421	0.235335	-1.40405	0.160305	0.279763
Buffy	40.1447	-0.233455	0.367048	-0.636034	0.524754	0.658549
Burs	2.87523	-3.21237	2.05822	-1.56075	0.118583	0.222113
Bx42	554.925	-0.0455753	0.222881	-0.204482	0.837977	0.898358
C15	32.5183	-0.230183	0.428962	-0.536604	0.591541	0.715222
C3G	3183.42	-0.291569	0.126381	-2.30706	0.0210517	0.0555059
C901	11.5865	-0.0119834	0.604176	-0.0198343	0.984176	0.99061
CAH1	3027.74	0.354088	0.192035	1.84387	0.0652018	0.138694
CAHbeta	100.255	-0.0475633	0.276131	-0.172249	0.863242	0.914511
CCAP	98.9771	0.51598	0.309152	1.66902	0.0951137	0.186833
CCHa1	109.87	-0.000693046	0.253888	-0.00272973	0.997822	0.998613
CCHa1-R	195.685	-0.104286	0.214412	-0.486383	0.626696	0.743593
CCKLR-17D1	256.853	-0.285657	0.165669	-1.72427	0.0846595	0.170588
CD98hc	3962.86	-0.122278	0.12688	-0.963726	0.335184	0.479227
CDC45L	162.224	0.323659	0.185945	1.74062	0.0817508	0.165954
CG10038	164.552	0.543708	0.276859	1.96385	0.0495479	0.111704
CG10041	2.78581	0.135874	1.29009	0.105321	0.916121	0.948441
CG10050	75.1301	0.474835	0.297955	1.59365	0.111015	0.210931
CG10053	59.7006	0.176649	0.32055	0.551081	0.581578	0.706727
CG10055	370.806	-0.0917446	0.147591	-0.621613	0.534196	0.665974
CG10064	3.58208	1.98986	1.25697	1.58306	0.113407	0.21437
CG10068	284.326	-0.150971	0.153358	-0.984437	0.324901	0.468625
CG10073	3.00236	4.84268	2.354	2.05721	0.0396657	0.093038
CG10075	240.86	0.312911	0.169175	1.84963	0.0643666	0.137413
CG10082	6480.29	-0.120719	0.118574	-1.01809	0.308635	0.451477
CG10092	215.315	-0.198311	0.175231	-1.13171	0.257755	0.395569
CG10098	1121.7	0.0567641	0.147179	0.385681	0.699733	0.799705
CG10103	694.548	0.161717	0.145452	1.11183	0.266212	0.405502
CG10132	2884.58	-0.406871	0.176585	-2.30411	0.0212164	0.0558153
CG10133	93.3069	0.326732	0.346828	0.942057	0.346163	0.490829
CG10137	1341.84	-0.0757709	0.115825	-0.654184	0.512993	0.649441
CG10144	342.365	-0.0760044	0.150671	-0.504441	0.613952	0.734295
CG10147	205.826	-0.0224219	0.163101	-0.137472	0.890657	0.933174
CG10151	444.052	-0.112391	0.157977	-0.711435	0.476815	0.617256
CG10171	214.517	0.135169	0.174473	0.774727	0.438501	0.582347
CG10175	18.3786	-0.210703	0.666813	-0.315985	0.752014	0.837772
CG10176	23.7646	-0.423372	0.564983	-0.749352	0.453645	0.595903
CG10177	21.0359	-0.634166	0.497096	-1.27574	0.202047	0.332149
CG10185	10.8462	-0.049499	0.683133	-0.0724588	0.942237	0.965299
CG10186	27918.5	-0.340116	0.174038	-1.95426	0.0506705	0.113799
CG10189	123.088	0.246349	0.226988	1.08529	0.277792	0.418995
CG10194	113.401	0.151837	0.221745	0.684739	0.493509	0.632546
CG10195	68.5555	0.515672	0.318072	1.62124	0.104965	0.201526
CG10205	8.40048	-0.510352	0.831632	-0.613675	0.53943	0.670767
CG10208	156.174	0.210181	0.247878	0.847919	0.396483	0.540661
CG10209	282.952	0.0263451	0.146599	0.179708	0.857382	0.91107
CG10214	212.52	0.423494	0.200685	2.11024	0.0348375	0.0836903
CG10217	277.656	-0.169023	0.144991	-1.16575	0.243716	0.379952
CG10219	1415.22	-0.215691	0.111938	-1.92687	0.0539953	0.119632
CG10222	62.1367	0.583896	0.300708	1.94174	0.0521688	0.116377
CG10232	6.2419	0.304789	0.881498	0.345762	0.729521	0.821901
CG10237	131.28	0.681134	0.419565	1.62343	0.104497	0.200872
CG1024	265.495	0.0864189	0.167037	0.517363	0.604903	0.726088
CG10252	11.4234	-0.915678	1.06532	-0.859537	0.390045	0.534846
CG10253	592.731	0.0848003	0.136769	0.620027	0.53524	0.667041
CG10254	1590.73	-0.10475	0.126776	-0.826263	0.408655	0.553082
CG10257	313.741	-0.279178	0.163209	-1.71056	0.0871628	0.174276
CG10262	138.114	0.151372	0.191422	0.790776	0.429074	0.573052
CG10265	142.539	-0.1708	0.203987	-0.837307	0.40242	0.546593
CG10268	110.946	0.439215	0.291334	1.5076	0.131657	0.240119
CG10283	395.301	-0.012594	0.166877	-0.0754687	0.939842	0.963701
CG10286	161.572	0.319027	0.179694	1.77539	0.0758332	0.156423
CG10306	611.946	0.147635	0.190967	0.773092	0.439468	0.58283
CG10311	330.583	0.35461	0.220262	1.60994	0.10741	0.205514
CG10320	766.966	0.316272	0.143973	2.19675	0.0280385	0.0701312
CG10321	720.777	0.0671101	0.154773	0.433605	0.664576	0.773591
CG10324	153.519	0.586025	0.28113	2.08453	0.0371117	0.0879014
CG10333	541.595	0.0168209	0.194065	0.0866767	0.930928	0.958261
CG10337	12.7254	-1.19716	1.01092	-1.18424	0.23632	0.371673
CG10338	355.768	-0.00957633	0.142431	-0.0672348	0.946395	0.968362
CG10339	3.28076	2.89444	1.51398	1.91181	0.0559009	0.123049
CG10340	533.729	-0.129934	0.156856	-0.828362	0.407466	0.55189
CG10341	137.204	0.415539	0.194822	2.13292	0.0329312	0.080034
CG10343	123.843	0.261683	0.2532	1.0335	0.301369	0.443843
CG10345	88.0443	0.554493	0.700073	0.79205	0.428332	0.572276
CG10347	224.919	0.337255	0.160659	2.0992	0.0357993	0.0856908
CG10348	11.2334	-1.15359	1.00381	-1.14921	0.250467	0.387633
CG10353	1636.02	0.157201	0.136858	1.14864	0.250703	0.387772
CG10365	580.09	0.00161204	0.136091	0.0118452	0.990549	0.993823
CG10375	313.121	0.168671	0.190597	0.884963	0.376177	0.520871
CG10376	543.384	-0.146201	0.133631	-1.09407	0.273926	0.414518
CG10407	15.5281	-0.27544	0.544473	-0.505885	0.612938	0.73339
CG10417	1741.59	0.0915893	0.0959636	0.954417	0.339873	0.484253
CG10418	110.102	0.326918	0.244231	1.33856	0.180713	0.306272
CG10420	268.047	0.130111	0.20413	0.637392	0.523869	0.657914
CG10425	171.371	0.469132	0.214688	2.18518	0.0288757	0.071778
CG10428	318.583	0.0335316	0.174682	0.191958	0.847775	0.904572
CG10431	68.6274	-0.299507	0.290881	-1.02965	0.303172	0.445696
CG10435	292.917	0.00380715	0.199	0.0191315	0.984736	0.990837
CG10462	142.05	0.114237	0.248698	0.459342	0.645989	0.759444
CG10465	876.114	0.0569309	0.187689	0.303325	0.761642	0.844685
CG10466	76.2721	-0.428872	0.284243	-1.50882	0.131345	0.239697
CG10469	57.6331	0.160551	0.305682	0.525224	0.599427	0.722227
CG10470	233.398	0.412173	0.186068	2.21517	0.0267482	0.0674611
CG10479	410.729	-0.0283378	0.189669	-0.149407	0.881233	0.927365
CG10494	121.3	0.0997519	0.29899	0.33363	0.738659	0.827791
CG10495	98.0066	0.505479	0.233863	2.16143	0.0306621	0.0754518
CG10513	848.188	-0.708772	0.592539	-1.19616	0.231633	0.366784
CG10514	518.755	0.0264382	0.287475	0.0919668	0.926724	0.955693
CG10516	193.83	0.488202	0.228241	2.13898	0.0324375	0.0789605
CG10550	1436.6	-0.0109485	0.248556	-0.0440484	0.964866	0.978236
CG10553	206.906	-0.317033	0.348451	-0.909834	0.36291	0.507774
CG10555	857.443	-0.0986929	0.124377	-0.793501	0.427486	0.571525
CG10559	10.4694	-1.9663	1.30462	-1.50718	0.131765	0.240135
CG10562	174.799	0.826337	0.39513	2.09131	0.0365005	0.0868021
CG10565	834.112	0.237183	0.22432	1.05734	0.290356	0.432477
CG10566	538.702	-0.069075	0.141612	-0.487775	0.62571	0.74303
CG10584	104.759	-0.123188	0.28509	-0.432104	0.665666	0.774435
CG10585	436.823	0.0135482	0.134611	0.100647	0.919831	0.951262
CG10590	631.642	0.00285827	0.122445	0.0233434	0.981376	0.988741
CG10600	1392.6	-0.265892	0.143319	-1.85524	0.063562	0.136113
CG10625	52.5454	-0.350467	0.388437	-0.902251	0.366924	0.511997
CG10628	193.373	0.445713	0.250869	1.77668	0.0756214	0.156016
CG10638	626.207	-0.0230705	0.129602	-0.17801	0.858715	0.911904
CG10639	605.645	0.18978	0.143862	1.31918	0.187109	0.314255
CG10646	166.792	-0.0564624	0.214801	-0.262859	0.792659	0.868711
CG10650	42.4927	0.277544	0.337431	0.822523	0.41078	0.554968
CG10654	883.597	0.0634415	0.141728	0.447629	0.654421	0.766811
CG10657	32.0778	-0.554511	0.615233	-0.901302	0.367428	0.512431
CG10660	284.163	0.253083	0.242501	1.04363	0.296655	0.439214
CG10663	32.7053	-1.18037	0.505666	-2.33429	0.0195806	0.0522395
CG10669	359.292	0.00942283	0.170391	0.0553011	0.955899	0.972806
CG10671	243.465	0.171012	0.166934	1.02443	0.305632	0.448133
CG10672	409.889	0.128791	0.170573	0.75505	0.450219	0.592135
CG10674	119.55	0.455422	0.243489	1.8704	0.0614283	0.132413
CG10681	120.415	-0.510778	0.222927	-2.29123	0.0219502	0.0572777
CG10700	9.72117	-1.32502	0.834576	-1.58765	0.112365	0.212947
CG10710	34.3138	-0.127513	0.424683	-0.300255	0.763983	0.846364
CG10721	258.019	0.111523	0.181235	0.61535	0.538324	0.669705
CG10730	3.67592	0.960391	1.43868	0.66755	0.504421	0.642216
CG10731	117.899	0.118002	0.220908	0.534168	0.593225	0.716606
CG10732	540.218	-0.0721692	0.163954	-0.440179	0.659808	0.76956
CG10734	6.40548	-0.528231	0.963205	-0.54841	0.583411	0.708294
CG10737	1853.22	-0.203031	0.104349	-1.94569	0.0516918	0.115556
CG1074	296.95	0.273563	0.154149	1.77466	0.0759538	0.156611
CG10747	318.073	-0.0942411	0.145787	-0.646428	0.518002	0.65392
CG10764	2.84507	-0.219004	1.34387	-0.162965	0.870546	0.920114
CG1077	5.44977	-0.25547	0.93604	-0.272926	0.78491	0.862621
CG10778	129.376	0.411264	0.241804	1.70082	0.0889774	0.17706
CG10795	161.876	0.0599572	0.18946	0.316464	0.75165	0.837534
CG10802	409.776	0.084991	0.147661	0.575582	0.564898	0.692226
CG10803	1294.89	0.00697698	0.134956	0.051698	0.958769	0.974455
CG10809	348.258	-0.227969	0.134518	-1.6947	0.0901317	0.179033
CG10841	2.46461	0.536991	1.33745	0.401505	0.688049	0.791204
CG10864	35.2524	-0.157902	0.465736	-0.339037	0.734582	0.825269
CG10869	11.7426	0.64158	0.946551	0.677809	0.497893	0.636806
CG10874	289.019	0.117738	0.179987	0.654147	0.513017	0.649441
CG10877	21.4713	-0.159084	0.52043	-0.305678	0.75985	0.843722
CG10880	116.268	-0.272127	0.216195	-1.25871	0.208136	0.339414
CG10889	57.5098	-0.346769	0.291074	-1.19134	0.233519	0.368928
CG10898	220.626	-0.0289654	0.168595	-0.171805	0.863591	0.91474
CG10903	136.859	0.463393	0.206642	2.24249	0.0249298	0.0636456
CG10904	160.85	0.075297	0.178971	0.420722	0.673958	0.780748
CG10907	143.364	0.373969	0.266913	1.40109	0.161187	0.280819
CG1091	597.543	-0.191615	0.117669	-1.62842	0.103435	0.199164
CG10914	130.459	0.330757	0.216827	1.52544	0.127149	0.233969
CG10915	1385.43	-0.285013	0.129528	-2.2004	0.0277786	0.0696137
CG10918	10.7291	-0.902042	0.725462	-1.2434	0.213719	0.345719
CG10919	2.4326	0.967833	1.50084	0.644859	0.519019	0.654425
CG10924	16.4753	-0.285153	0.8503	-0.335355	0.737357	0.826958
CG10927	28.677	0.727819	0.421255	1.72774	0.0840353	0.169652
CG10933	5.45466	0.39409	1.09173	0.360976	0.718118	0.814582
CG10948	1301.66	-0.201598	0.151218	-1.33316	0.18248	0.308528
CG10949	201.871	0.331188	0.251508	1.31681	0.187902	0.315188
CG10958	186	0.206539	0.200927	1.02793	0.303985	0.446643
CG10959	78.2345	0.24415	0.284148	0.859236	0.39021	0.535003
CG10960	5684.52	0.00555195	0.121936	0.0455317	0.963683	0.977579
CG10970	7.62723	-0.492859	0.763011	-0.645939	0.518319	0.654009
CG10973	234.014	-0.0828001	0.196656	-0.421041	0.673725	0.780563
CG10979	553.783	-0.0402251	0.154816	-0.259825	0.794999	0.870467
CG10984	1123.37	-0.116739	0.137268	-0.850448	0.395076	0.539447
CG11007	302.147	0.0727898	0.174371	0.417442	0.676355	0.782245
CG11029	34.202	-0.948068	0.766781	-1.23643	0.2163	0.34878
CG1103	104.82	0.0517789	0.229054	0.226056	0.821158	0.887551
CG11030	1356.41	-0.138857	0.150234	-0.924271	0.355345	0.500641
CG11034	18.5415	0.621008	0.522878	1.18767	0.234963	0.370411
CG1104	635.788	0.280678	0.128575	2.18299	0.0290368	0.0721032
CG11043	13.7933	-0.357844	0.69066	-0.518119	0.604375	0.725804
CG11044	7.22883	-1.08092	0.886438	-1.21939	0.222696	0.356709
CG1105	390.443	0.239926	0.167124	1.43562	0.151112	0.267633
CG11050	1482.35	-0.150415	0.130406	-1.15344	0.24873	0.385675
CG11060	2.45768	0.529737	1.36548	0.387948	0.698054	0.798474
CG11069	11.5796	-0.682668	0.62589	-1.09072	0.275398	0.416212
CG11070	646.186	-0.206232	0.138789	-1.48594	0.137295	0.248042
CG11073	108.182	-0.76713	0.358327	-2.14087	0.0322847	0.0787149
CG11077	238.359	0.163905	0.265706	0.616866	0.537323	0.668931
CG11085	112.581	-0.431355	0.262158	-1.6454	0.0998871	0.193897
CG11095	109.459	-0.12233	0.222965	-0.54865	0.583246	0.708175
CG11103	139.502	0.0133174	0.200812	0.0663177	0.947125	0.968774
CG11106	4.34949	-3.14462	1.82165	-1.72625	0.0843031	0.170128
CG11107	643.501	0.22461	0.124081	1.81018	0.0702672	0.147393
CG11109	182.101	-0.111785	0.186905	-0.598084	0.549784	0.679901
CG11110	77.157	0.27561	0.305898	0.900988	0.367595	0.512596
CG11122	2357	-0.374011	0.238749	-1.56655	0.117221	0.220015
CG11123	147.116	0.383411	0.20974	1.82802	0.067546	0.142738
CG11125	40.1883	0.513086	0.488103	1.05118	0.293175	0.435824
CG11127	226.278	-0.244527	0.178837	-1.36731	0.171527	0.294367
CG1113	3.44949	1.18272	1.32869	0.890139	0.373391	0.518501
CG11137	619.652	0.406015	0.179588	2.26081	0.0237709	0.0612759
CG11141	502.737	-0.0302285	0.131312	-0.230203	0.817934	0.885528
CG11147	217.05	0.136553	0.302564	0.451321	0.651758	0.764535
CG11151	807.118	0.225514	0.135993	1.65827	0.0972629	0.190001
CG11158	95.2863	0.392108	0.327916	1.19576	0.23179	0.366961
CG1116	361.515	-0.0101178	0.14001	-0.072265	0.942391	0.965299
CG11160	30.4661	-0.812149	0.481146	-1.68795	0.0914213	0.181019
CG11164	19.3636	0.914919	0.506292	1.8071	0.0707468	0.148058
CG11170	58.4798	0.572056	0.285301	2.00509	0.0449531	0.103184
CG11178	463.021	-9.84172e-05	0.134748	-0.000730378	0.999417	0.9997
CG11190	829.648	0.222571	0.115853	1.92115	0.0547127	0.120885
CG11200	137.93	0.247553	0.220042	1.12503	0.260577	0.399064
CG11208	367.585	0.318477	0.163318	1.95004	0.0511715	0.114658
CG11210	841.623	-0.206736	0.126363	-1.63606	0.101828	0.196656
CG11211	6.68995	-1.70549	1.55281	-1.09833	0.272062	0.412344
CG11247	1779.44	0.151497	0.0996388	1.52046	0.128395	0.235854
CG11248	787.321	-0.108548	0.119263	-0.910157	0.36274	0.507625
CG11257	95.8405	0.215564	0.278679	0.773522	0.439214	0.582701
CG11261	28.8876	0.924782	0.490542	1.88523	0.0593993	0.129091
CG11263	11.0205	-0.690616	0.690496	-1.00017	0.317227	0.46018
CG11266	3637.34	-0.186107	0.154395	-1.20539	0.228051	0.362554
CG11275	112.376	0.255824	0.243834	1.04917	0.294099	0.43677
CG11284	587.424	0.214266	0.146747	1.46011	0.14426	0.258341
CG11294	198.216	-0.318179	0.317964	-1.00067	0.316984	0.459954
CG11306	1051.75	0.0668328	0.0971083	0.688229	0.491308	0.630469
CG11307	188.196	0.241449	0.188248	1.28261	0.199628	0.329755
CG11318	4.5474	1.95816	1.10493	1.77221	0.07636	0.157326
CG11320	6.75115	0.666621	0.988888	0.674112	0.50024	0.638443
CG11321	29.8551	-0.92594	0.462145	-2.00357	0.0451159	0.103446
CG11329	3.77516	-0.936791	1.0738	-0.872405	0.382988	0.527905
CG11337	144.426	0.191236	0.202366	0.945001	0.344658	0.489283
CG11342	33.5816	0.620136	0.495663	1.25112	0.210889	0.342445
CG11353	10.8475	-2.24009	1.48245	-1.51107	0.13077	0.238853
CG11360	5455.77	-0.0855485	0.232304	-0.368262	0.712678	0.809796
CG11368	73.3851	0.732495	0.63385	1.15563	0.247834	0.384566
CG1137	31.8584	-1.56846	0.807625	-1.94206	0.0521296	0.116314
CG11370	9.20802	-1.9922	1.07753	-1.84886	0.0644786	0.137541
CG11378	160.793	-0.875436	0.386026	-2.26782	0.0233402	0.060415
CG11396	413.806	-0.160127	0.136749	-1.17096	0.241615	0.377564
CG11398	89.4713	0.429662	0.240451	1.7869	0.0739536	0.153418
CG11399	1248.76	-0.293172	0.12521	-2.34144	0.0192095	0.0514399
CG11406	46.6261	-0.285016	0.366702	-0.777241	0.437016	0.580811
CG11407	573.782	0.0935586	0.281628	0.332206	0.739734	0.828573
CG11409	3.12252	0.859574	1.16699	0.736574	0.461381	0.602712
CG11412	522.685	-0.108619	0.170214	-0.63813	0.523389	0.657672
CG11414	574.886	-0.280326	0.132048	-2.12291	0.0337612	0.0817892
CG11418	129.467	0.485791	0.229423	2.11744	0.0342223	0.082661
CG1142	226.754	0.2895	0.237393	1.2195	0.222656	0.356699
CG11423	7.06079	-1.7492	2.05795	-0.849969	0.395342	0.539591
CG11425	43.926	1.40149	0.704458	1.98947	0.0466499	0.106275
CG11426	396.532	-0.253565	0.161463	-1.57043	0.116316	0.218772
CG11436	214.633	0.260864	0.226237	1.15306	0.248887	0.385749
CG11438	7.63357	-2.29549	0.994881	-2.3073	0.021038	0.0554972
CG11447	104.261	0.269133	0.28678	0.938464	0.348006	0.492456
CG11453	3.86955	-0.533054	1.32887	-0.401134	0.688321	0.791271
CG11454	240.636	0.236807	0.173073	1.36825	0.171234	0.294007
CG11455	1211.25	-0.0964141	0.137464	-0.701376	0.483068	0.622696
CG11456	268.609	0.0956966	0.150548	0.635655	0.525001	0.658701
CG11459	6.69434	2.2097	1.23671	1.78675	0.0739779	0.15343
CG1146	315.747	-0.389307	0.22009	-1.76885	0.0769184	0.158415
CG11474	586.903	-0.207649	0.161722	-1.28399	0.199147	0.329266
CG11504	350.154	0.134166	0.166476	0.80592	0.420289	0.564227
CG11523	222.588	0.257988	0.242565	1.06358	0.287518	0.429458
CG11529	3.6682	4.07759	2.06296	1.97657	0.04809	0.108949
CG11534	185.528	-0.0532869	0.181998	-0.292789	0.769683	0.851051
CG11539	47.3684	0.155108	0.351124	0.441747	0.658672	0.768896
CG11550	15.7807	0.526304	1.09095	0.482425	0.629504	0.74606
CG11555	99.1678	-0.122647	0.255517	-0.479997	0.63123	0.747387
CG11560	131.9	0.0993731	0.233342	0.425868	0.670204	0.777546
CG11562	106.034	0.0011523	0.266934	0.00431679	0.996556	0.997871
CG11586	156.034	0.241251	0.280024	0.861536	0.388943	0.533886
CG11590	129.956	0.281706	0.20843	1.35156	0.176515	0.300885
CG11593	765.219	-0.193597	0.117154	-1.6525	0.0984324	0.191827
CG11596	274.815	0.278855	0.175216	1.59149	0.1115	0.211512
CG11597	112.043	-0.530178	0.236579	-2.24102	0.0250249	0.0638578
CG11601	242.331	-0.0373087	0.186079	-0.200499	0.841091	0.900242
CG11617	6.12224	0.621307	0.881109	0.705142	0.480722	0.620673
CG11619	174.911	0.330607	0.229387	1.44127	0.14951	0.265326
CG11626	32.4601	0.491746	0.440127	1.11728	0.263874	0.402641
CG11665	1989.16	-0.226429	0.144792	-1.56383	0.117859	0.221047
CG11672	8.98929	3.23746	1.85808	1.74237	0.0814436	0.165552
CG11674	3.73226	2.47692	1.25874	1.96778	0.0490935	0.110867
CG11679	71.793	0.485999	0.257398	1.88812	0.0590102	0.128403
CG11686	61.9383	-0.218082	0.437696	-0.498249	0.618309	0.737431
CG11696	214.851	0.142437	0.228243	0.624056	0.532591	0.664909
CG11697	2.89155	-2.47035	1.72863	-1.42908	0.15298	0.270115
CG11699	519.213	-0.13489	0.222868	-0.605245	0.545016	0.675579
CG11700	279.151	-0.353159	0.230508	-1.53209	0.125501	0.231699
CG11710	395.085	0.215325	0.170396	1.26367	0.206347	0.337546
CG11714	9.70885	-0.729606	0.9249	-0.788848	0.430201	0.574123
CG1172	600.357	0.156242	0.115394	1.35399	0.175739	0.299804
CG11722	211.715	-0.0749041	0.168063	-0.445691	0.655821	0.767605
CG11723	282.793	0.292604	0.162534	1.80026	0.0718188	0.149918
CG11737	391.672	-0.0838225	0.168922	-0.496219	0.61974	0.738557
CG11739	915.147	0.167223	0.136184	1.22792	0.219476	0.352669
CG11753	183.59	-0.451066	0.251554	-1.79312	0.0729542	0.152019
CG11755	67.3853	0.0554168	0.283127	0.195731	0.844821	0.903234
CG11760	4.66738	-0.0787329	1.06201	-0.0741359	0.940902	0.964602
CG11768	2.97659	0.225156	1.21556	0.185228	0.85305	0.908102
CG11771	743.229	0.057338	0.141622	0.404866	0.685576	0.789313
CG11777	74.6157	-0.0448849	0.251255	-0.178643	0.858218	0.911794
CG11779	724.147	-0.0531529	0.130099	-0.408557	0.682865	0.787315
CG11781	153.447	0.139215	0.215216	0.646861	0.517722	0.653722
CG11788	108.954	0.57853	0.263822	2.19288	0.0283157	0.0706097
CG11791	708.072	-0.000452449	0.151088	-0.00299461	0.997611	0.998613
CG11796	43.6427	1.09247	0.505281	2.1621	0.0306105	0.0753768
CG11802	364.231	0.0540927	0.152495	0.354717	0.722802	0.817539
CG11807	627.741	0.0348349	0.159909	0.217841	0.827553	0.891831
CG11808	58.9758	0.60065	0.339841	1.76744	0.0771539	0.158796
CG11811	404.603	-0.013915	0.14438	-0.0963782	0.92322	0.953468
CG11825	14.2442	1.14581	0.690254	1.65999	0.0969171	0.18958
CG11828	4.88029	-1.2521	0.938825	-1.33369	0.182307	0.308431
CG11835	19.5174	0.453705	0.534572	0.848726	0.396034	0.540268
CG11839	57.2346	0.492396	0.335172	1.46908	0.14181	0.254639
CG11842	20.6773	1.09171	0.751856	1.45202	0.146495	0.261417
CG11857	1012.22	0.108925	0.0959376	1.13537	0.256219	0.393668
CG11876	2381.34	-0.279777	0.18113	-1.54462	0.122438	0.227547
CG11882	46.1235	0.444773	0.354333	1.25524	0.209391	0.340741
CG11885	62.4482	0.230026	0.341948	0.672694	0.501142	0.638826
CG11892	166.044	-0.280145	0.241308	-1.16094	0.245665	0.382373
CG11898	3.37499	-2.74608	1.66105	-1.65321	0.0982872	0.191614
CG11902	599.438	0.0177586	0.150577	0.117937	0.906117	0.94277
CG11906	172.656	0.193974	0.217249	0.892865	0.371929	0.517147
CG11920	103.357	0.38623	0.243935	1.58333	0.113345	0.214323
CG11927	234.251	0.185258	0.191873	0.965522	0.334284	0.478551
CG11951	30.3357	1.00125	0.812958	1.23161	0.218095	0.350981
CG11961	330.775	0.504276	0.220235	2.28972	0.0220377	0.0574776
CG11970	757.873	-0.176007	0.148415	-1.18591	0.235657	0.370982
CG11975	522.142	-0.205583	0.130366	-1.57696	0.114805	0.21639
CG11980	337.023	0.290263	0.150565	1.92782	0.0538775	0.119437
CG11982	477.723	0.331892	0.180803	1.83565	0.0664092	0.140755
CG11983	71.9059	-0.226135	0.295586	-0.765041	0.444247	0.587116
CG11984	1737.61	-0.0401794	0.165424	-0.242887	0.808093	0.879366
CG11985	209.853	0.0716097	0.250981	0.285319	0.7754	0.855622
CG11986	104.486	0.376485	0.305618	1.23188	0.217993	0.350915
CG11997	5.22277	-0.829416	0.97221	-0.853125	0.39359	0.538109
CG12006	405.209	-0.0197569	0.156275	-0.126424	0.899397	0.937742
CG12007	276.702	0.33411	0.242373	1.37849	0.168051	0.289807
CG12010	74.9299	-0.380697	0.292308	-1.30238	0.192785	0.321249
CG12011	6.63724	0.40017	0.818248	0.489057	0.624801	0.742257
CG12012	395.801	0.112603	0.160136	0.703171	0.481949	0.621857
CG12014	178.615	-0.242056	0.230939	-1.04814	0.294575	0.437233
CG12018	88.6273	0.277536	0.255819	1.08489	0.277968	0.419202
CG12024	1011.11	-0.0439878	0.118741	-0.370453	0.711045	0.808545
CG12025	2427.78	-0.278162	0.127727	-2.17778	0.0294223	0.0728222
CG12027	6.00851	-2.8475	1.46511	-1.94354	0.051951	0.115989
CG12034	337.492	-0.231786	0.146567	-1.58144	0.113778	0.214913
CG12038	817.291	0.255536	0.108731	2.35017	0.0187646	0.0504393
CG12042	379.668	-0.111825	0.129917	-0.860742	0.38938	0.534279
CG12056	170.087	0.0520826	0.224934	0.231546	0.816891	0.885117
CG12065	849.557	-0.294731	0.235553	-1.25123	0.210852	0.342437
CG12071	1526.29	-0.14331	0.143012	-1.00209	0.316301	0.459277
CG12075	19.3223	-0.361615	0.523853	-0.690299	0.490006	0.629424
CG12081	325.671	-0.497951	0.213039	-2.33738	0.0194196	0.051911
CG12082	397.343	0.227254	0.208043	1.09234	0.274683	0.415367
CG12090	1791.47	0.17044	0.118909	1.43336	0.151755	0.268548
CG12091	2303.47	-0.0600027	0.140669	-0.426553	0.669705	0.777241
CG12096	307.907	-0.336095	0.150214	-2.23744	0.0252573	0.0643117
CG12099	1615.92	-0.236534	0.146669	-1.61271	0.106807	0.204608
CG12104	194.406	0.247466	0.179781	1.37649	0.16867	0.290637
CG12106	160.579	-0.157068	0.195786	-0.802241	0.422414	0.566127
CG12107	292.532	0.297172	0.175429	1.69398	0.0902699	0.179216
CG12112	62.3771	-0.537238	0.284117	-1.8909	0.0586371	0.127775
CG12118	296.984	-0.133227	0.155223	-0.858291	0.390732	0.535442
CG12123	225.252	0.391662	0.166551	2.3516	0.0186927	0.0502714
CG12125	602.199	-0.109328	0.126448	-0.864608	0.387254	0.532566
CG12128	306.611	0.0809421	0.154317	0.524517	0.599919	0.722598
CG12129	198.493	0.323149	0.183655	1.75954	0.0784852	0.160738
CG1213	1123.12	0.566795	0.28472	1.99071	0.046513	0.106054
CG12134	57.1013	0.661535	0.380046	1.74067	0.0817417	0.165954
CG12155	515.04	-0.1457	0.16703	-0.872299	0.383045	0.527905
CG12158	11.1997	-2.04347	0.924277	-2.21089	0.0270437	0.0680933
CG12159	304.583	0.0861689	0.14899	0.578354	0.563025	0.690489
CG12162	594.752	0.0652322	0.167342	0.389814	0.696674	0.797323
CG12163	3037.37	-0.104574	0.199688	-0.523686	0.600497	0.723006
CG12170	228.896	0.431154	0.223128	1.93232	0.0533205	0.118499
CG12173	284.58	0.237148	0.158716	1.49416	0.135133	0.244844
CG12177	664.438	0.455922	0.285603	1.59635	0.110412	0.209983
CG12179	137.527	0.150686	0.203657	0.7399	0.459361	0.600695
CG1218	140.192	0.299867	0.286562	1.04643	0.295363	0.437973
CG12182	268.502	-0.0154097	0.148567	-0.103723	0.917389	0.949477
CG12184	7.61615	0.181847	0.750596	0.24227	0.808571	0.879616
CG12203	976.64	0.0196698	0.176437	0.111483	0.911233	0.945777
CG12206	3.65384	0.514491	1.0958	0.469513	0.638703	0.753667
CG12207	930.915	-0.130533	0.10389	-1.25645	0.208952	0.340183
CG12213	1625.13	-0.195104	0.123246	-1.58305	0.113411	0.21437
CG12219	183.889	0.192553	0.208186	0.924912	0.355012	0.500304
CG12224	15.0524	1.61733	0.702276	2.30298	0.0212799	0.055911
CG12229	3.49171	-0.97039	1.77264	-0.547427	0.584085	0.70887
CG12236	746.112	-0.0865801	0.117813	-0.734893	0.462405	0.603604
CG12237	998.431	0.0919359	0.215893	0.42584	0.670224	0.777546
CG12241	597.059	0.210713	0.17708	1.18993	0.234074	0.36953
CG12253	242.256	-0.0229869	0.159631	-0.144	0.8855	0.929907
CG12259	106.831	0.616724	0.29532	2.08832	0.0367687	0.0872641
CG12263	494.534	-0.0234835	0.143124	-0.164078	0.86967	0.919437
CG12264	507.579	0.302422	0.172272	1.75549	0.0791755	0.161809
CG12267	88.5168	0.373295	0.234376	1.59272	0.111224	0.211214
CG12272	575.216	-0.0970549	0.127575	-0.760769	0.446795	0.589164
CG12278	8.46333	0.445348	0.767573	0.580203	0.561778	0.689596
CG12279	151.503	0.408749	0.201053	2.03305	0.0420477	0.0979037
CG12299	875.331	-0.228629	0.143557	-1.59261	0.111248	0.211222
CG12304	343.259	0.36531	0.156499	2.33427	0.0195818	0.0522395
CG1231	164.141	-0.17286	0.205556	-0.840938	0.400383	0.544383
CG12310	3.71231	-0.623208	2.25774	-0.276032	0.782524	0.861068
CG12316	595.246	-0.112051	0.1179	-0.950395	0.341912	0.486164
CG12320	117.144	0.268566	0.207965	1.2914	0.196565	0.326217
CG12321	117.71	0.220206	0.222936	0.987755	0.323273	0.467097
CG12325	210.167	0.140759	0.183283	0.767985	0.442496	0.58581
CG1233	472.628	-0.144205	0.148897	-0.968484	0.332803	0.476978
CG12333	475.466	0.0720041	0.230243	0.312732	0.754485	0.839783
CG12341	213.17	-0.384881	0.195804	-1.96565	0.049339	0.111351
CG12343	316.665	-0.0864999	0.171676	-0.503856	0.614363	0.734621
CG12344	184.161	-0.26276	0.242571	-1.08323	0.278707	0.420018
CG12355	1711.69	-0.413412	0.198963	-2.07783	0.037725	0.0891097
CG12362	5.19726	0.811	0.948765	0.854796	0.392664	0.537465
CG12379	45.5299	0.309987	0.328479	0.943704	0.345321	0.490093
CG12384	653.277	0.176424	0.153415	1.14997	0.250155	0.387207
CG12391	576.054	0.301312	0.217487	1.38542	0.165924	0.287117
CG12393	292.408	0.291884	0.240768	1.2123	0.225396	0.359463
CG12400	821.03	0.14877	0.128554	1.15726	0.247168	0.383982
CG12404	402.796	0.132201	0.148129	0.89247	0.372141	0.517374
CG12413	118.71	0.617076	0.283895	2.17361	0.0297348	0.0735441
CG12420	7.95248	-0.0502622	0.811027	-0.0619735	0.950584	0.97054
CG12426	7.20572	-6.49953	3.91384	-1.66065	0.0967833	0.189377
CG12428	258.511	0.0661874	0.176558	0.374877	0.707752	0.805836
CG12470	13.1158	0.778085	0.766737	1.0148	0.310201	0.453207
CG12493	5.9492	-1.45066	0.946645	-1.53242	0.125418	0.231627
CG12499	286.525	0.166173	0.179619	0.925143	0.354891	0.500201
CG12539	4.59553	-1.13427	1.08925	-1.04133	0.297721	0.440487
CG12547	1564.75	0.140555	0.182633	0.769606	0.441534	0.584839
CG12560	119.349	-0.246314	0.21653	-1.13755	0.255309	0.392678
CG12581	115.578	-0.579845	0.29926	-1.93759	0.0526727	0.117231
CG12582	640.993	0.363621	0.154559	2.35263	0.018641	0.0501578
CG12590	19.8866	-1.43447	0.618563	-2.31904	0.020393	0.0540372
CG12592	9.76389	0.763165	0.743477	1.02648	0.304665	0.44721
CG12608	242.394	-0.309486	0.163329	-1.89487	0.0581099	0.126965
CG12640	3.85427	-0.953409	1.17856	-0.808963	0.418537	0.56223
CG12643	77.7899	-0.212086	0.279493	-0.758826	0.447957	0.589754
CG1265	292.601	-0.360709	0.176201	-2.04714	0.0406441	0.095039
CG12655	9.22023	0.000126071	0.754347	0.000167126	0.999867	0.999892
CG12659	41.7246	-0.204601	0.350191	-0.584256	0.559048	0.687437
CG12672	66.4597	-0.57899	0.320168	-1.80839	0.0705452	0.147718
CG12699	8.09184	-0.806471	1.78586	-0.451586	0.651567	0.764395
CG12702	5.83503	0.996652	1.02268	0.974549	0.329784	0.473931
CG1271	221.161	0.199211	0.252388	0.789306	0.429933	0.573839
CG12713	42.2496	0.16159	0.345618	0.46754	0.640114	0.754411
CG12716	70.0617	0.425759	0.313364	1.35867	0.174251	0.297886
CG12717	421.772	-0.150139	0.150349	-0.998605	0.317986	0.460904
CG12723	3.13959	0.64009	1.29787	0.493183	0.621883	0.739961
CG12728	226.72	-0.292696	0.207291	-1.41201	0.157948	0.276558
CG12730	619.462	-0.0707534	0.111043	-0.637169	0.524015	0.657914
CG12736	309.917	0.0250083	0.199138	0.125583	0.900062	0.938216
CG12744	14.6041	0.42792	0.620673	0.689445	0.490543	0.629961
CG12746	400.753	-0.328948	0.156912	-2.09638	0.0360485	0.0860547
CG12766	12.636	1.52217	0.677129	2.24797	0.0245781	0.063005
CG12768	488.108	-0.202526	0.140346	-1.44305	0.149006	0.264782
CG12772	520.693	-0.0163502	0.156243	-0.104646	0.916657	0.948903
CG12773	498.951	-0.134757	0.12848	-1.04886	0.294244	0.436801
CG12783	5.45454	0.31417	0.893879	0.351468	0.725237	0.819146
CG12795	174.448	-0.20624	0.25765	-0.800465	0.423442	0.567313
CG12817	238.081	-0.194396	0.187546	-1.03652	0.299959	0.442118
CG12818	83.0947	0.0480466	0.25411	0.189078	0.850032	0.905888
CG12822	696.416	0.238405	0.221163	1.07796	0.281051	0.422887
CG12825	21.824	-0.194972	0.503239	-0.387433	0.698435	0.798613
CG12836	8.98673	-0.381122	0.707056	-0.539026	0.589869	0.713932
CG12848	132.058	0.472137	0.245389	1.92404	0.0543499	0.120258
CG12857	15.1172	-0.13822	0.611831	-0.225913	0.821269	0.887551
CG12859	526.846	0.00886629	0.153764	0.0576615	0.954018	0.971951
CG12860	6.42415	-0.103399	1.77122	-0.0583772	0.953448	0.971806
CG12861	6.292	-0.59426	1.78636	-0.332665	0.739387	0.82836
CG12863	87.0613	0.37397	0.240355	1.55591	0.11973	0.22361
CG12868	128.764	0.124209	0.265757	0.467379	0.640228	0.754426
CG12869	15.8334	0.566218	0.562427	1.00674	0.31406	0.456959
CG1287	7.12292	-1.03415	1.0144	-1.01947	0.307979	0.450641
CG12877	253.763	0.332695	0.192061	1.73224	0.0832313	0.168452
CG1288	2.62882	-1.78621	2.34566	-0.761496	0.446361	0.588884
CG12880	19.9847	-0.18181	0.474142	-0.383451	0.701385	0.800732
CG12883	47.9723	0.694998	0.313355	2.21793	0.0265599	0.0670817
CG12885	6.39191	0.897452	0.919411	0.976116	0.329007	0.473455
CG12895	247.542	0.075	0.185029	0.405343	0.685226	0.789239
CG12896	45.2334	0.610393	0.377123	1.61855	0.105544	0.202381
CG12907	3.52993	-0.723516	1.85351	-0.390349	0.696278	0.797043
CG1291	189.511	-0.0834652	0.177322	-0.470698	0.637857	0.75347
CG12910	57.9985	0.245418	0.301693	0.813469	0.415949	0.559674
CG12923	7.22665	0.226701	0.831513	0.272637	0.785132	0.862687
CG12929	50.3967	0.396434	0.314992	1.25855	0.208192	0.339414
CG12935	119.423	0.273272	0.253112	1.07965	0.280299	0.422178
CG12945	407.778	-0.499451	0.216691	-2.3049	0.0211724	0.0557409
CG12948	147.177	0.172484	0.231616	0.744701	0.456452	0.598626
CG12964	22.3429	-1.06117	0.468349	-2.26577	0.0234656	0.0606509
CG12974	2.74046	1.90833	1.45576	1.31089	0.189897	0.317831
CG12985	3.44299	-0.977282	1.10191	-0.886901	0.375132	0.520171
CG1299	71.5081	-0.239528	0.323194	-0.741129	0.458615	0.600206
CG12992	15.7787	-1.59184	0.910007	-1.74926	0.0802459	0.163587
CG13001	352.783	0.0606567	0.192849	0.31453	0.753119	0.838702
CG13003	21.5549	-0.685975	0.583904	-1.17481	0.240072	0.375981
CG13004	178.382	-0.162058	0.23929	-0.677246	0.49825	0.636933
CG13005	83.4417	0.276646	0.248487	1.11332	0.26557	0.404756
CG13008	42.1473	-0.304514	0.399702	-0.761853	0.446148	0.588676
CG13012	62.1725	0.0854861	0.36934	0.231456	0.81696	0.885117
CG13014	47.2372	0.653266	0.346969	1.88278	0.0597304	0.129716
CG13016	123	-0.302218	0.22875	-1.32117	0.186444	0.313535
CG13018	68.1512	0.256727	0.285748	0.898439	0.368952	0.514016
CG13024	17.6267	0.15546	0.743516	0.209088	0.834379	0.895676
CG13025	247.861	0.054653	0.166505	0.328237	0.742733	0.830707
CG13032	2.96314	0.244386	1.29192	0.189165	0.849964	0.905888
CG13044	4.2652	-5.73504	2.45451	-2.33653	0.0194637	0.0520028
CG13054	62.8763	0.588638	0.339086	1.73595	0.0825719	0.167429
CG13056	9.47738	-1.2891	0.923708	-1.39557	0.162844	0.283032
CG13068	9.13938	-1.01771	0.800643	-1.27112	0.203686	0.334223
CG13085	8.8525	0.854206	0.82404	1.03661	0.299919	0.442118
CG13088	47.6902	0.444994	0.314838	1.41341	0.157537	0.276106
CG1309	640.055	0.0230669	0.133609	0.172645	0.86293	0.914314
CG13090	137.544	0.171678	0.205137	0.836893	0.402653	0.546839
CG13096	164.898	0.41223	0.18328	2.24918	0.0245009	0.0628376
CG13101	8.23007	1.80478	1.02985	1.75248	0.0796914	0.16256
CG13108	376.366	-0.247844	0.18779	-1.31979	0.186904	0.314059
CG1311	620.487	-0.0485377	0.129319	-0.375333	0.707413	0.805622
CG13116	39.0578	-0.883432	0.42985	-2.05521	0.0398588	0.0934497
CG13117	47.3221	-0.842685	0.447714	-1.88219	0.0598098	0.129848
CG13123	67.2965	-0.0228356	0.266616	-0.0856496	0.931745	0.958805
CG13124	1738.79	-0.0329397	0.0955939	-0.34458	0.73041	0.822467
CG13126	157.323	0.341432	0.225207	1.51608	0.1295	0.237186
CG13133	6.13168	0.577421	1.24915	0.462251	0.643901	0.757745
CG13135	3.68255	-5.52261	2.35577	-2.34429	0.0190632	0.0511127
CG1314	5.55965	-0.947945	1.37602	-0.688905	0.490883	0.630169
CG13142	221.266	-0.372258	0.16114	-2.31015	0.0208799	0.0551758
CG13148	181.626	0.0314995	0.233043	0.135166	0.892481	0.933887
CG13151	99.2444	0.217457	0.312934	0.694898	0.487119	0.627004
CG1316	2167.61	0.0990124	0.142286	0.695871	0.48651	0.626372
CG13163	140.884	0.0494619	0.210166	0.235346	0.81394	0.882845
CG13168	31.6839	-0.0560891	0.395463	-0.141831	0.887213	0.931219
CG13177	2.37346	1.76308	1.56721	1.12498	0.260595	0.399064
CG13178	6.13266	-0.746355	0.882026	-0.846183	0.39745	0.541575
CG13183	3.2105	-4.28887	2.02535	-2.1176	0.0342089	0.0826476
CG13185	487.194	0.136717	0.328941	0.415629	0.677682	0.783182
CG1319	262.036	0.37215	0.178925	2.07992	0.0375333	0.0888009
CG13192	140.776	0.256634	0.224692	1.14216	0.253388	0.390787
CG13197	511.577	-0.185101	0.144931	-1.27717	0.201542	0.33188
CG13203	55.8435	-0.190316	0.3537	-0.538073	0.590526	0.714402
CG13204	524.032	-0.290698	0.177308	-1.63951	0.101107	0.195675
CG13215	3.92497	-5.6316	2.44772	-2.30075	0.0214055	0.0561458
CG13220	407.062	0.206555	0.161992	1.27509	0.202276	0.332392
CG13255	261.086	-0.0977284	0.229153	-0.426477	0.669761	0.777241
CG13258	4.12838	0.281529	1.18219	0.238142	0.811771	0.881923
CG13284	127.043	-0.685839	0.312216	-2.19668	0.028043	0.0701312
CG13285	9.87411	1.63759	1.40821	1.16289	0.244875	0.381535
CG13287	30.335	0.0323417	0.421111	0.0768009	0.938782	0.962986
CG13288	43.7548	-0.780153	0.339917	-2.29513	0.0217256	0.0568172
CG13295	296.614	-0.0939492	0.146383	-0.641804	0.521001	0.655912
CG13314	10.1604	-0.920427	0.836803	-1.09993	0.271361	0.411634
CG13315	598.626	0.725334	0.388804	1.86555	0.0621044	0.133577
CG13318	9.76065	1.69033	1.56821	1.07788	0.281089	0.422887
CG13319	72.3426	0.535895	0.265892	2.01546	0.0438562	0.101191
CG13332	3.86013	-0.0518985	1.32062	-0.0392987	0.968652	0.98077
CG13334	3.05915	2.12394	1.46985	1.44501	0.148456	0.264247
CG13337	23.7359	-0.486468	0.700936	-0.694026	0.487666	0.627404
CG13339	157.459	0.0131158	0.201142	0.0652066	0.94801	0.968774
CG13344	749.679	-0.0748006	0.205114	-0.364677	0.715352	0.812226
CG13364	279.561	0.43102	0.226518	1.90281	0.0570657	0.12525
CG13365	206.539	-0.12637	0.236429	-0.534494	0.593	0.716415
CG13366	946.094	-0.203113	0.113927	-1.78283	0.0746138	0.154357
CG13367	195.123	0.340431	0.309802	1.09887	0.271827	0.412131
CG13373	15.5265	0.098984	0.627918	0.157639	0.874742	0.923054
CG13376	9.89125	0.0873558	0.759004	0.115093	0.908372	0.944283
CG13377	16.4648	-0.777704	0.517356	-1.50323	0.13278	0.241539
CG13392	85.4188	0.140375	0.298512	0.470249	0.638177	0.753577
CG13397	396.657	-0.228413	0.218748	-1.04418	0.2964	0.439021
CG13398	524.04	-0.279004	0.134249	-2.07826	0.0376855	0.0890817
CG13407	2.82389	-0.87013	1.26685	-0.686846	0.49218	0.631224
CG13408	287.405	-0.247264	0.161836	-1.52787	0.126545	0.233099
CG13436	24.1902	0.254024	0.500915	0.50712	0.612071	0.732777
CG1344	688.975	0.107226	0.149522	0.717127	0.473296	0.613598
CG13442	2.38823	-0.380616	2.28384	-0.166656	0.867641	0.917931
CG13455	14.5124	0.883497	0.653811	1.3513	0.176598	0.300938
CG13458	163.559	0.42541	0.191555	2.22082	0.0263629	0.0666635
CG13484	81.0426	0.0530219	0.252482	0.210003	0.833665	0.895676
CG13500	15.3119	-0.327712	0.592499	-0.5531	0.580195	0.705518
CG13502	17.6223	0.118084	0.527928	0.223673	0.823011	0.888682
CG13516	6.87368	1.18428	0.815682	1.45189	0.146533	0.261442
CG13531	418.709	0.241945	0.149193	1.62169	0.10487	0.201416
CG13532	583.08	-0.128337	0.117634	-1.09098	0.27528	0.416152
CG13559	9.8626	1.44492	0.810936	1.7818	0.0747825	0.154615
CG13562	5.44243	1.48564	1.09283	1.35945	0.174004	0.297657
CG13563	3.07252	0.348257	1.24351	0.280061	0.779431	0.85891
CG13575	3.5425	-0.287009	1.08894	-0.263568	0.792113	0.868202
CG13578	7.91612	0.0264301	0.785794	0.033635	0.973168	0.984006
CG13585	882.236	-0.222978	0.14467	-1.54129	0.123247	0.228647
CG13594	1162.49	0.0856733	0.14972	0.572224	0.567171	0.69413
CG13599	6.88082	0.389433	0.827865	0.470406	0.638065	0.753566
CG1360	67.5489	0.51298	0.270699	1.89502	0.0580892	0.12695
CG13601	221.119	0.296245	0.194046	1.52668	0.126841	0.233564
CG13604	614.739	0.0245419	0.124468	0.197175	0.843691	0.902571
CG13605	354.86	0.11322	0.146202	0.774411	0.438688	0.582377
CG13609	85.3714	-0.0513364	0.253214	-0.202739	0.839339	0.899092
CG13611	2.62878	1.31623	1.29665	1.0151	0.310057	0.453058
CG13616	3.23396	-0.0729955	1.22535	-0.059571	0.952497	0.971427
CG13617	3.19036	0.217635	1.25596	0.173281	0.86243	0.914314
CG13618	89.4582	-0.620565	1.32188	-0.469456	0.638744	0.753667
CG13623	213.808	-0.484273	0.21449	-2.25779	0.023959	0.0616411
CG13625	254.988	0.330008	0.28779	1.1467	0.251506	0.388731
CG13627	7.91463	1.32228	0.835675	1.58229	0.113584	0.214616
CG13630	213.176	0.30913	0.175843	1.75799	0.0787496	0.161093
CG13631	1856.63	-0.113608	0.185968	-0.610901	0.541265	0.672655
CG13641	17.2475	0.882889	0.59199	1.49139	0.135859	0.245907
CG13643	4.87123	2.38008	1.20049	1.98259	0.0474129	0.107713
CG13646	2.64182	1.74913	1.47587	1.18515	0.235958	0.37129
CG13658	3.62052	0.353816	1.14618	0.308692	0.757556	0.842092
CG13663	114.024	0.269813	0.234405	1.15106	0.249709	0.386741
CG13667	102.684	0.41046	0.274473	1.49545	0.134798	0.244361
CG13671	258.55	0.267784	0.15023	1.7825	0.0746681	0.154439
CG13676	11.1118	-1.90972	0.816702	-2.33833	0.0193701	0.0518048
CG13678	2.56706	0.697671	1.44891	0.481514	0.630151	0.746443
CG13679	11.3971	0.75666	0.670324	1.1288	0.258984	0.397053
CG13689	49.2777	0.227987	0.406039	0.56149	0.574463	0.700554
CG13694	2.47229	3.49284	1.75677	1.98822	0.0467874	0.106543
CG13700	7.95276	0.334303	0.750685	0.445331	0.656081	0.767825
CG13707	472.403	0.177529	0.150665	1.1783	0.238677	0.374244
CG13708	16.0926	0.411831	0.619894	0.664358	0.506461	0.643865
CG1371	1127.51	-0.17659	0.100981	-1.74874	0.0803358	0.163739
CG13716	5.58008	0.64747	1.00629	0.643424	0.519949	0.655148
CG13737	13.3944	0.49799	0.640656	0.777313	0.436974	0.580811
CG13751	145.972	0.128434	0.20953	0.612963	0.539901	0.671196
CG13759	162.368	-0.485389	0.210686	-2.30385	0.0212309	0.0558258
CG13760	698.968	-0.00890644	0.143828	-0.0619243	0.950623	0.97054
CG13766	225.163	0.00834445	0.17005	0.0490706	0.960863	0.975463
CG13775	113.379	-0.0987328	0.212877	-0.463802	0.642789	0.756688
CG13807	89.951	0.609732	0.350769	1.73827	0.0821626	0.166758
CG13827	75.7283	-0.117021	0.263475	-0.444147	0.656937	0.768234
CG13841	3.38733	0.116865	1.20829	0.0967194	0.922949	0.95328
CG13850	457.893	-0.0520281	0.129905	-0.400509	0.688782	0.791594
CG13856	5.85711	-1.10144	0.955234	-1.15306	0.248886	0.385749
CG13865	781.74	-0.123697	0.105805	-1.1691	0.242365	0.378512
CG13869	2.52267	-0.219355	1.3054	-0.168037	0.866555	0.916991
CG1387	4.09365	0.634737	1.27485	0.497891	0.618561	0.737497
CG13870	33.352	0.966187	0.508265	1.90095	0.0573087	0.125723
CG13872	2.82032	0.756224	1.50378	0.502882	0.615047	0.734879
CG13875	5.6427	-1.37174	0.964382	-1.4224	0.15491	0.272722
CG13876	114.745	0.100847	0.235272	0.428637	0.668187	0.776301
CG13877	134.491	-0.0144184	0.222175	-0.0648965	0.948256	0.968869
CG13887	741.454	0.280287	0.125468	2.23394	0.0254871	0.0647571
CG13889	57.1139	0.716315	0.326985	2.19067	0.0284758	0.0709259
CG13890	251.66	0.419457	0.186263	2.25195	0.0243252	0.0624171
CG13891	2.5062	-0.206441	1.91664	-0.10771	0.914226	0.947217
CG13894	154.624	-0.37723	0.191257	-1.97237	0.048567	0.109936
CG13896	50.1683	-0.0457464	0.323292	-0.141502	0.887473	0.931324
CG13898	6.29962	-1.92047	1.35878	-1.41338	0.157545	0.276106
CG13900	385.166	0.409052	0.1789	2.28649	0.0222258	0.0579255
CG13901	120.06	0.545057	0.288521	1.88914	0.0588731	0.12821
CG13902	116.787	0.137724	0.235852	0.583943	0.559259	0.687616
CG13917	9844.05	-0.279141	0.1612	-1.73165	0.0833358	0.168592
CG13919	42.3262	-0.0349608	0.386281	-0.0905061	0.927885	0.956611
CG13920	1018.65	-0.205041	0.105806	-1.9379	0.0526351	0.117172
CG13921	1173.52	-0.284729	0.143677	-1.98173	0.0475099	0.10791
CG13924	30.7307	-0.0407756	0.486064	-0.0838895	0.933144	0.959333
CG13926	86.0964	0.056024	0.243553	0.230028	0.81807	0.885528
CG13933	1067.19	-0.270764	0.124796	-2.16965	0.0300337	0.0741626
CG13936	66.8812	0.261043	0.63102	0.413684	0.679106	0.784237
CG13937	1630.59	0.119936	0.118702	1.0104	0.312306	0.455343
CG1394	3.86006	-1.44912	1.80514	-0.802773	0.422106	0.56588
CG13950	9.90703	1.75299	0.77694	2.25628	0.0240531	0.0618683
CG13957	245.962	-0.124079	0.172449	-0.71951	0.471827	0.612189
CG13962	6.32907	-3.29682	1.40913	-2.33961	0.019304	0.051667
CG13970	2.88	-0.0191604	1.19194	-0.0160749	0.987175	0.992406
CG13982	247.055	-0.270476	0.157275	-1.71976	0.0854755	0.171955
CG13984	10.6535	-1.30476	0.993196	-1.3137	0.188948	0.316542
CG1399	2003.17	-0.327881	0.151053	-2.17063	0.0299589	0.0740296
CG13993	218.171	0.271556	0.177111	1.53325	0.125214	0.23129
CG13994	118.976	0.139199	0.239679	0.580773	0.561394	0.689204
CG13996	5.06389	-1.13769	1.01457	-1.12134	0.262142	0.400854
CG14005	153.949	0.410977	0.232732	1.76588	0.077416	0.15907
CG14022	9.23928	-0.548562	0.798134	-0.687306	0.49189	0.631004
CG14040	171.482	0.0213813	0.217135	0.0984702	0.921559	0.952493
CG14043	527.072	-0.400676	0.185828	-2.15616	0.0310712	0.0762636
CG14044	49.5558	0.000765314	0.382629	0.00200015	0.998404	0.999062
CG14050	13.5709	0.7934	0.682635	1.16226	0.245129	0.381764
CG14052	2.79406	0.646787	1.29858	0.498072	0.618433	0.737496
CG14057	44.3015	0.54037	0.331444	1.63035	0.103028	0.198596
CG1407	469.977	-0.0641437	0.150163	-0.427159	0.669263	0.777089
CG14073	1323.9	-0.341939	0.188982	-1.80938	0.0703927	0.14755
CG14074	101.354	0.0070371	0.230143	0.0305771	0.975607	0.985253
CG14075	764.755	1.35795	0.580601	2.33886	0.0193426	0.0517442
CG14079	3.03408	0.709791	1.21087	0.586181	0.557754	0.686241
CG14086	33.7046	0.541437	0.405255	1.33604	0.181536	0.307309
CG14102	145.282	0.027985	0.207932	0.134587	0.892938	0.93409
CG14104	32.3502	0.261466	0.434283	0.602062	0.547133	0.67757
CG14105	7.61028	0.658656	0.836482	0.787412	0.431041	0.574883
CG14113	2.37924	-2.13885	1.76773	-1.20994	0.226301	0.360473
CG14117	45.9444	0.156817	0.329705	0.475629	0.634339	0.750064
CG14125	5.60966	4.73969	2.23338	2.1222	0.0338208	0.0818961
CG14130	89.3301	0.0680435	0.305292	0.22288	0.823629	0.889258
CG14131	3.83524	-0.251898	1.42441	-0.176844	0.859631	0.912365
CG14135	210.869	-0.120509	0.198125	-0.608247	0.543024	0.67389
CG14137	3.50063	-1.61678	1.14192	-1.41584	0.156823	0.27527
CG14142	114.078	-0.516206	0.221935	-2.32593	0.0200223	0.0531742
CG14153	121.604	-0.618862	0.289267	-2.13942	0.0324019	0.0789455
CG14154	3.02457	-0.358378	1.47896	-0.242318	0.808534	0.879616
CG14174	31.5259	0.484283	0.40558	1.19405	0.232458	0.367748
CG1418	174.806	0.23532	0.193048	1.21897	0.222856	0.356859
CG14182	206.898	0.199281	0.178401	1.11704	0.263976	0.402641
CG14184	306.366	0.0471135	0.183139	0.257256	0.796981	0.872095
CG14185	3.45211	0.0162738	1.07619	0.0151216	0.987935	0.992419
CG14194	428.068	-0.157514	0.134711	-1.16927	0.242294	0.378457
CG14196	249.986	-0.100697	0.215305	-0.467693	0.640004	0.754411
CG14200	1817.49	-0.183288	0.170714	-1.07365	0.282978	0.425113
CG14207	1235.46	-0.0299447	0.106362	-0.281535	0.7783	0.858109
CG14212	4.28965	-0.382828	1.08615	-0.352464	0.72449	0.818838
CG14220	218.135	-0.0376166	0.164575	-0.228568	0.819205	0.886373
CG14221	6.9539	1.58251	0.883286	1.79162	0.0731943	0.15237
CG14223	22.752	0.558459	0.511872	1.09101	0.275267	0.416152
CG14229	167.687	-0.0112038	0.200048	-0.0560057	0.955337	0.972806
CG14231	116.046	0.401657	0.228222	1.75994	0.0784178	0.160631
CG14232	410.461	0.0937314	0.219392	0.427232	0.669211	0.777089
CG14238	2.65004	0.893723	1.252	0.713833	0.47533	0.615776
CG14247	3.81737	1.94445	1.27673	1.52299	0.12776	0.23485
CG14252	148.34	0.24124	0.198433	1.21572	0.22409	0.358134
CG14253	163.413	-0.255768	0.20574	-1.24316	0.213809	0.345759
CG14257	9.53627	-0.0107752	0.696176	-0.0154776	0.987651	0.992419
CG14259	36.0139	0.426688	0.788619	0.541057	0.588468	0.712723
CG1427	711.335	-0.0649369	0.133208	-0.487486	0.625914	0.74313
CG14270	153.442	0.437641	0.19753	2.21557	0.0267207	0.0674078
CG14273	9.13452	-0.439961	0.734486	-0.599005	0.54917	0.679426
CG14275	43.4081	0.942609	0.43182	2.18287	0.0290451	0.072107
CG14285	23.6572	0.924436	0.46309	1.99623	0.0459084	0.104877
CG14286	46.7832	0.534779	0.325465	1.64313	0.100357	0.194507
CG14291	193.414	-0.198851	0.207705	-0.957374	0.338379	0.482691
CG14298	8.07405	-0.529395	0.808962	-0.654413	0.512846	0.649417
CG14299	1189.48	-0.307747	0.14562	-2.11335	0.0345705	0.0832749
CG14304	3.45231	-2.85104	2.07418	-1.37454	0.169275	0.291349
CG14312	154.636	-0.236017	0.19807	-1.19159	0.233423	0.368831
CG14314	544.059	-0.172196	0.138481	-1.24346	0.213697	0.345719
CG14321	225.941	-0.272655	0.182983	-1.49006	0.136209	0.246457
CG14322	872.686	-0.179591	0.172642	-1.04025	0.298224	0.441045
CG14327	7.63734	0.895254	0.975454	0.917782	0.358733	0.503811
CG14331	60.8327	-0.232601	0.273449	-0.85062	0.394981	0.539386
CG14341	148.376	0.355375	0.202085	1.75854	0.078656	0.160964
CG14352	63.1816	0.159627	0.290853	0.548825	0.583126	0.70811
CG14353	211.73	0.0435037	0.186779	0.232916	0.815827	0.88425
CG14354	3.85749	0.143329	1.12263	0.127672	0.898408	0.937252
CG14355	3.54649	1.58993	2.07849	0.764945	0.444304	0.587118
CG14356	10.2705	0.0388016	0.896702	0.0432714	0.965485	0.978473
CG14367	58.0751	-0.245817	0.366636	-0.670467	0.50256	0.640362
CG14397	13.0943	1.66621	0.713915	2.33391	0.0196006	0.0522765
CG1440	1088.06	0.108662	0.139037	0.78153	0.434491	0.578106
CG14401	50.4902	0.143128	0.343438	0.416751	0.676861	0.782659
CG14407	379.761	-0.128629	0.166228	-0.773809	0.439044	0.582558
CG14408	3514.3	-0.118017	0.127959	-0.922296	0.356374	0.501558
CG1441	10.1893	0.864572	0.814523	1.06145	0.288487	0.430542
CG14410	8.48026	-1.30089	0.898915	-1.44718	0.147846	0.263466
CG14411	910.681	0.0798926	0.130136	0.613917	0.53927	0.670647
CG14434	135.191	-0.481669	0.285669	-1.68611	0.0917752	0.181585
CG14435	1500.29	0.0122543	0.0926954	0.132199	0.894827	0.934913
CG14439	96.3818	0.734638	0.331426	2.2166	0.0266507	0.0672631
CG1444	2135.52	0.161162	0.0954871	1.68779	0.0914514	0.181045
CG14440	1203.44	-0.126677	0.109508	-1.15679	0.247359	0.384166
CG14442	1601.54	-0.143076	0.174007	-0.822247	0.410936	0.554968
CG14445	8.81338	0.637145	0.757847	0.840731	0.400499	0.544388
CG14448	3.90519	-1.21604	1.27932	-0.950539	0.341838	0.486125
CG14450	251.227	-0.0570198	0.170751	-0.333935	0.738428	0.827759
CG14451	2.37738	0.558164	1.64223	0.339883	0.733945	0.824786
CG14457	13.9584	0.443669	0.609986	0.727342	0.467016	0.607607
CG14463	142.017	0.386206	0.216707	1.78216	0.0747239	0.154524
CG14464	1129.94	-0.217977	0.163069	-1.33672	0.181313	0.307045
CG14476	6219.76	-0.121918	0.126396	-0.964577	0.334757	0.478745
CG14480	350.216	0.358601	0.248225	1.44466	0.148553	0.264247
CG14482	768.647	-0.181924	0.174759	-1.041	0.297877	0.440655
CG14483	401.863	0.00758033	0.162608	0.0466173	0.962818	0.976888
CG14490	4.65463	2.01384	1.08416	1.85751	0.0632392	0.135551
CG14495	3.43325	-0.435801	1.42268	-0.306324	0.759358	0.843264
CG14508	5.67857	0.644858	0.951759	0.677544	0.498061	0.636806
CG14511	20.6875	0.627753	0.616368	1.01847	0.308455	0.451276
CG14512	59.125	0.0913603	0.363991	0.250996	0.801817	0.874866
CG14529	7.85828	0.213403	0.837938	0.254676	0.798973	0.873109
CG14540	2.94673	2.54886	2.13715	1.19264	0.233009	0.368233
CG14543	82.3155	0.374451	0.281246	1.3314	0.183058	0.30926
CG14544	15.3984	0.860357	0.695432	1.23715	0.21603	0.3485
CG14556	6.12857	-1.35076	0.888923	-1.51954	0.128626	0.236155
CG14561	41.4588	0.751551	0.394454	1.90529	0.0567418	0.124642
CG14562	1784.95	-0.227064	0.126811	-1.79057	0.0733623	0.15263
CG14566	5.72993	-3.16435	1.61195	-1.96305	0.0496402	0.111828
CG1458	1119.17	-0.200109	0.107621	-1.85938	0.0629732	0.13509
CG14589	13.3052	-0.431701	0.733965	-0.588176	0.556414	0.684912
CG14590	34.8255	-0.740506	0.488589	-1.5156	0.12962	0.237365
CG14608	3.58972	-2.35246	1.47087	-1.59936	0.10974	0.208844
CG14609	6.61759	-0.523197	0.886086	-0.590458	0.554883	0.683661
CG14613	352.201	0.216871	0.159575	1.35905	0.174131	0.297777
CG14619	4702.93	-0.0793546	0.120664	-0.65765	0.510763	0.647731
CG14621	551.978	-0.264015	0.146003	-1.80829	0.0705616	0.147718
CG1463	267.88	-0.225527	0.188339	-1.19745	0.23113	0.366407
CG14641	515.611	0.204151	0.134088	1.52252	0.12788	0.235029
CG14644	2.5321	0.351006	1.40722	0.249432	0.803026	0.875737
CG14645	298.189	2.34699	2.71349	0.864934	0.387075	0.532494
CG14646	225.052	-0.0702572	0.174453	-0.402729	0.687148	0.79051
CG14647	411.044	0.0559376	0.136038	0.411192	0.680932	0.785421
CG14651	3.76364	-1.19531	1.26939	-0.941643	0.346375	0.490999
CG14655	5.84672	-0.0684342	1.05035	-0.0651536	0.948052	0.968774
CG14662	7.34718	-0.518362	0.75969	-0.682333	0.495028	0.634341
CG14667	240.177	0.206979	0.162336	1.27501	0.202307	0.332392
CG14671	109.242	0.222081	0.249068	0.891645	0.372583	0.517921
CG14683	677.879	0.149713	0.111644	1.34098	0.179925	0.30535
CG14687	1558.17	-0.0421575	0.127591	-0.330412	0.741089	0.829217
CG14688	820.673	0.360001	0.287316	1.25298	0.210213	0.341608
CG14692	11.7836	0.941056	0.663397	1.41854	0.156033	0.2742
CG14694	2.54089	1.13711	1.43369	0.793136	0.427699	0.571718
CG14695	24.3643	1.01242	0.498984	2.02897	0.0424618	0.0986596
CG14696	230.699	-0.0593112	0.30528	-0.194285	0.845953	0.903717
CG14701	51.6186	0.487052	0.342385	1.42252	0.154874	0.272704
CG14710	120.006	0.283946	0.206382	1.37583	0.168875	0.290802
CG14711	171.987	0.278655	0.200261	1.39146	0.164086	0.284562
CG14712	430.753	-0.0954697	0.154184	-0.619193	0.535789	0.667446
CG14715	50.0082	0.307317	0.336251	0.913952	0.360742	0.505629
CG14721	281.863	-0.10039	0.182483	-0.550136	0.582226	0.707422
CG14722	525.631	-0.00542748	0.137155	-0.039572	0.968434	0.98077
CG14741	1828.89	0.201493	0.187682	1.07359	0.283008	0.425113
CG14742	3.30377	0.146404	1.35596	0.107971	0.914019	0.947188
CG14749	327.038	0.0355206	0.233961	0.151823	0.879327	0.926091
CG14752	7.10026	-0.93386	0.922241	-1.0126	0.311252	0.454243
CG14757	432.451	-0.0902599	0.167201	-0.539828	0.589316	0.713425
CG14760	3.27653	0.168733	1.1158	0.151222	0.879801	0.926368
CG14763	2.50987	-1.74321	1.36178	-1.2801	0.20051	0.330669
CG14764	1079.1	-0.120065	0.101886	-1.17842	0.238629	0.374244
CG14777	442.146	0.0489659	0.210832	0.23225	0.816344	0.884629
CG14778	18.9417	0.568764	0.514605	1.10524	0.269054	0.40873
CG14780	3.00445	0.428435	1.17602	0.36431	0.715626	0.812414
CG14786	510.886	0.27821	0.133918	2.07747	0.0377581	0.0891475
CG14787	18.7028	-0.913581	0.534387	-1.70959	0.0873422	0.174475
CG14795	7.55773	-0.156807	1.07277	-0.146171	0.883787	0.928786
CG14797	5.8869	-2.5401	1.0989	-2.31148	0.0208062	0.0550212
CG14798	23.2538	0.831171	0.555252	1.49693	0.134412	0.243871
CG14803	139.247	0.335214	0.215066	1.55865	0.119078	0.222745
CG14805	256.511	0.424186	0.189955	2.23309	0.0255429	0.0648523
CG14811	4.11468	-0.688237	1.03593	-0.664366	0.506456	0.643865
CG14812	214.419	0.179006	0.184645	0.969457	0.332317	0.476527
CG14817	260.896	0.308846	0.179458	1.721	0.085251	0.171584
CG14818	602.554	0.311748	0.172224	1.81013	0.0702762	0.147393
CG14820	13.4017	1.50104	0.671284	2.23608	0.0253467	0.0644816
CG14830	32.6943	-0.0884704	0.368072	-0.240362	0.81005	0.880774
CG14834	17.9754	0.490379	0.575243	0.852472	0.393952	0.538396
CG14837	6.9283	-0.402989	0.979674	-0.411351	0.680815	0.785421
CG14855	174.056	0.756231	0.335397	2.25474	0.0241498	0.062042
CG14856	8.70683	0.264034	0.705537	0.374231	0.708233	0.806124
CG14857	48.0228	-0.232423	0.359757	-0.646055	0.518244	0.653992
CG1486	1023.97	0.00901014	0.124694	0.0722581	0.942397	0.965299
CG14864	55.2905	-0.132786	0.333812	-0.397788	0.690787	0.79315
CG14866	4.37154	0.581747	1.00427	0.579272	0.562406	0.690208
CG14868	729.779	-0.0327981	0.171188	-0.191591	0.848062	0.904579
CG14877	16.7999	-0.815445	0.570916	-1.42831	0.153203	0.270389
CG14879	20.0737	0.238898	0.53683	0.445016	0.656308	0.767922
CG14880	32.8712	-0.312269	0.703394	-0.443946	0.657082	0.768319
CG14881	134.927	-0.0313406	0.226816	-0.138176	0.890101	0.932869
CG14882	176.656	-0.0342308	0.215476	-0.158861	0.873778	0.92222
CG14883	434.946	0.31156	0.144717	2.15288	0.031328	0.0768052
CG14892	10.1522	-1.15386	0.695789	-1.65834	0.0972487	0.190001
CG14894	306.747	0.253525	0.230546	1.09968	0.271474	0.411745
CG14898	86.2953	-0.0283238	0.272784	-0.103832	0.917303	0.949477
CG14903	155.88	0.371458	0.191112	1.94367	0.0519354	0.115979
CG14906	82.4914	0.172823	0.300361	0.575385	0.565031	0.69231
CG14907	25.6254	0.65444	0.514458	1.2721	0.203339	0.333756
CG1492	589.27	-0.146363	0.124911	-1.17174	0.2413	0.377237
CG14937	53.9036	0.19729	0.364838	0.540761	0.588673	0.71289
CG1494	6.62921	-1.32337	0.995012	-1.33	0.183517	0.309691
CG14946	360.444	-0.492279	0.300192	-1.63988	0.10103	0.195562
CG14947	3.80805	0.348645	1.18064	0.295303	0.767763	0.849224
CG14949	4.71044	1.11764	1.31069	0.85271	0.39382	0.538285
CG14964	11.0096	0.615451	0.702174	0.876492	0.380762	0.525782
CG14965	73.4311	-0.124195	0.276273	-0.449538	0.653044	0.765536
CG14966	64.016	0.385872	0.278282	1.38662	0.165556	0.286574
CG14971	515.261	0.195812	0.125343	1.56221	0.118238	0.221641
CG14977	183.424	0.433431	0.207069	2.09317	0.036334	0.0864744
CG15012	829.832	-0.217765	0.125103	-1.74069	0.0817384	0.165954
CG15014	106.323	0.415621	0.246405	1.68674	0.0916535	0.181378
CG15019	191.933	0.429389	0.21466	2.00032	0.0454662	0.104047
CG15025	2.8912	-1.5638	1.31465	-1.18952	0.234235	0.369675
CG15027	62.6087	0.659319	0.309095	2.13306	0.0329197	0.080034
CG1503	12.3183	0.211121	0.687807	0.306948	0.758883	0.843001
CG15040	4.82353	-0.450956	0.997048	-0.452291	0.651059	0.764053
CG15043	6.769	-0.322548	0.832642	-0.387379	0.698476	0.798613
CG15046	17.2032	0.738325	0.621041	1.18885	0.234498	0.369922
CG15047	5.13988	-1.5647	0.951837	-1.64388	0.100201	0.19434
CG15065	32.4585	1.37122	0.679807	2.01707	0.0436879	0.100934
CG15071	2.56241	-1.7546	2.00244	-0.876234	0.380903	0.525839
CG15073	150.363	0.0957545	0.183151	0.522819	0.6011	0.723411
CG15080	81.1673	-0.0564275	0.316881	-0.178071	0.858667	0.911904
CG15082	150.708	0.363273	0.192581	1.88634	0.059249	0.128844
CG15083	22.9597	0.418452	0.51302	0.815665	0.414692	0.558619
CG15084	79.3603	0.465867	0.291208	1.59978	0.109648	0.208706
CG15087	494.96	-0.189355	0.11777	-1.60784	0.107871	0.206285
CG15097	255.106	0.0883439	0.171127	0.516248	0.605681	0.726612
CG15098	3652.11	-0.115134	0.215088	-0.535289	0.59245	0.716115
CG15100	568.846	0.168446	0.121061	1.39142	0.164099	0.284562
CG15107	129.483	-0.266673	0.214386	-1.24389	0.213539	0.345624
CG15109	5.75733	-0.850196	1.04718	-0.811891	0.416854	0.560395
CG15118	631.034	0.227651	0.127604	1.78404	0.0744166	0.15402
CG15120	4.3162	2.27339	1.24443	1.82685	0.0677217	0.142995
CG15127	2.41217	-4.93051	2.63078	-1.87416	0.0609085	0.13166
CG15130	2.88535	-0.286954	1.27635	-0.224824	0.822116	0.887898
CG15141	452.787	0.159952	0.156219	1.0239	0.305884	0.448248
CG15143	10.4884	1.42631	0.680758	2.09518	0.0361553	0.0862322
CG15144	8.80666	0.46367	0.782167	0.592801	0.553314	0.682598
CG15145	7.86431	0.0926501	0.984038	0.0941529	0.924988	0.954643
CG15160	541.71	-0.0475812	0.119269	-0.39894	0.689938	0.792604
CG15161	3.80292	0.164275	1.12444	0.146095	0.883847	0.928786
CG15177	2.6934	-3.02691	2.23514	-1.35423	0.175662	0.299792
CG15196	7.40542	-1.02426	0.800644	-1.27929	0.200794	0.330909
CG15202	36.4674	0.822447	0.405431	2.02857	0.0425018	0.0987309
CG15203	145.087	0.284361	0.222672	1.27704	0.201588	0.33188
CG15209	5173.33	0.195104	0.105608	1.84743	0.0646855	0.137817
CG15210	68.7194	-0.142675	0.312497	-0.456564	0.647985	0.761117
CG15211	41.8403	0.157081	0.355658	0.441663	0.658733	0.768896
CG15219	9.77006	-2.34742	1.74799	-1.34293	0.179296	0.3046
CG15221	15.5757	0.912478	0.654782	1.39356	0.163451	0.283808
CG1523	313.05	0.204169	0.179395	1.1381	0.25508	0.392579
CG15236	5331.05	-0.126959	0.107352	-1.18264	0.236951	0.372411
CG15237	226.53	0.120995	0.167849	0.720854	0.470999	0.611367
CG15247	8.88172	-0.852751	0.735549	-1.15934	0.246318	0.383161
CG15279	140.999	-0.132106	0.289158	-0.456865	0.647768	0.760946
CG15286	3.49003	-1.5563	1.51817	-1.02511	0.30531	0.447847
CG15306	2.41719	-0.0610464	1.83567	-0.0332557	0.973471	0.984031
CG1532	289.191	0.39466	0.247001	1.59781	0.110086	0.209427
CG15322	5.27738	-1.03097	0.97866	-1.05345	0.292134	0.434519
CG15332	11.8035	-0.0311511	0.709416	-0.0439109	0.964975	0.978236
CG15337	3.38628	-2.74822	1.61095	-1.70596	0.0880161	0.175648
CG15345	54.0518	0.136396	0.354482	0.384776	0.700404	0.800042
CG15356	873.079	0.0392646	0.122189	0.321343	0.747951	0.835399
CG15365	31.8395	0.234862	0.441121	0.532421	0.594434	0.717577
CG15368	3.27969	-0.0981456	1.30039	-0.075474	0.939838	0.963701
CG15369	11.0381	0.919511	0.795622	1.15571	0.247798	0.384566
CG15387	59.8578	-0.433804	0.348512	-1.24473	0.213231	0.345245
CG15390	101.36	-0.00824823	0.262436	-0.0314295	0.974927	0.98483
CG15394	47.7789	-0.323764	0.379408	-0.853342	0.39347	0.538014
CG15399	12.8415	-1.04398	0.63953	-1.63241	0.102593	0.197865
CG15406	2.5077	-0.232219	1.30304	-0.178213	0.858556	0.911904
CG15412	84.3317	0.484959	0.281289	1.72406	0.0846974	0.170632
CG15414	8.37746	-2.09426	1.54994	-1.35119	0.176636	0.300946
CG15425	2.82466	-0.482481	1.45174	-0.332346	0.739628	0.828542
CG15432	160.718	-0.201708	0.254208	-0.793476	0.427501	0.571525
CG15435	115.431	0.195089	0.235228	0.829359	0.406901	0.551402
CG15439	164.034	-0.160114	0.199005	-0.804574	0.421066	0.56477
CG15440	191.259	0.144905	0.19095	0.758861	0.447936	0.589754
CG15443	255.627	0.15636	0.171479	0.911835	0.361856	0.506989
CG15445	268.134	0.231822	0.211596	1.09559	0.273258	0.413743
CG15449	51.5588	-0.430542	0.414774	-1.03802	0.299262	0.441844
CG1545	1168.17	-0.291835	0.170599	-1.71065	0.0871467	0.174276
CG15456	77.3078	-0.109781	0.286867	-0.382689	0.70195	0.801205
CG15459	5.86838	0.20598	0.912343	0.225771	0.82138	0.887551
CG15473	30.8225	0.912075	0.67352	1.35419	0.175676	0.299792
CG15475	10.2151	-0.492947	0.786973	-0.626384	0.531063	0.663626
CG15482	2.36457	-0.739967	1.61844	-0.457211	0.647519	0.760822
CG15506	6.50854	0.226106	0.905657	0.24966	0.80285	0.875635
CG15523	487.196	-0.275049	0.216762	-1.2689	0.204477	0.33521
CG15525	105.466	0.370108	0.233179	1.58723	0.112461	0.213046
CG15535	77.1671	-0.589705	0.291846	-2.02061	0.0433206	0.100341
CG15536	71.9227	0.339792	0.265685	1.27893	0.200922	0.331068
CG15537	1613.6	0.141761	0.0997633	1.42098	0.155324	0.273386
CG15539	41.0056	0.86016	0.367984	2.33749	0.0194135	0.0519078
CG15544	26.9418	-0.582725	0.472612	-1.23299	0.217581	0.350312
CG15546	14.6142	-2.1211	1.02401	-2.07137	0.0383238	0.0902088
CG15547	199.125	0.0729498	0.220011	0.331573	0.740212	0.828759
CG15550	4.89448	0.703393	0.962836	0.730543	0.465058	0.605916
CG15554	9.48796	1.01948	0.792339	1.28667	0.19821	0.328279
CG15556	14.0377	0.218877	0.786524	0.278284	0.780795	0.860021
CG15561	81.2045	0.455533	0.407817	1.117	0.263993	0.402641
CG15570	2.55806	-1.77165	1.42641	-1.24204	0.214223	0.34627
CG15579	11.8115	-0.0164374	0.710421	-0.0231376	0.981541	0.988769
CG15580	4.32002	0.223891	1.06937	0.209366	0.834162	0.895676
CG15594	2.3865	-0.852749	1.55663	-0.547819	0.583816	0.708705
CG15601	105.837	0.0427835	0.244886	0.174707	0.86131	0.913508
CG15602	249.225	0.221111	0.161344	1.37043	0.170552	0.293168
CG1561	105.031	1.17315	0.58228	2.01476	0.0439299	0.101339
CG15614	4.26946	-0.976341	1.01549	-0.96145	0.336326	0.480536
CG15629	147.426	0.558183	0.270295	2.06509	0.0389143	0.0913563
CG15631	4.19373	-1.36645	1.10223	-1.23971	0.215083	0.347396
CG15642	117.921	-0.0608507	0.249398	-0.24399	0.807239	0.878884
CG15643	163.139	-0.224494	0.191136	-1.17453	0.240184	0.376083
CG15651	1085.73	-0.0598168	0.0989215	-0.60469	0.545385	0.675878
CG15653	53.3416	0.458457	0.335788	1.36532	0.172154	0.295157
CG15657	7.32759	-1.5045	1.04998	-1.43289	0.15189	0.268697
CG15661	290.417	0.320503	0.239803	1.33653	0.181377	0.307103
CG15666	51.0186	-0.244449	0.35316	-0.692178	0.488826	0.628679
CG15673	111.826	-0.41776	0.2666	-1.56699	0.117116	0.219888
CG15674	4.40201	-0.096012	1.2355	-0.0777108	0.938058	0.962702
CG15704	208.823	0.2052	0.166097	1.23543	0.216672	0.349166
CG15706	302.185	-0.103267	0.146455	-0.705114	0.48074	0.620673
CG15715	403.562	0.268519	0.187452	1.43247	0.15201	0.26882
CG1572	222.591	-0.526377	0.241189	-2.18242	0.0290782	0.0721555
CG15728	7.46578	-0.654923	0.783709	-0.835671	0.40334	0.547493
CG15735	859.524	-0.0648474	0.121964	-0.531691	0.59494	0.718024
CG15743	232.678	0.368551	0.183426	2.00926	0.0445097	0.102387
CG15744	496.219	-0.281495	0.159837	-1.76114	0.0782151	0.160308
CG15747	438.483	0.138126	0.159003	0.868699	0.385012	0.530271
CG1575	92.8049	0.0545345	0.246278	0.221435	0.824754	0.890111
CG15766	2.60351	0.884011	1.46173	0.604771	0.545331	0.675878
CG15771	1430.94	-0.142841	0.120861	-1.18186	0.23726	0.372801
CG15772	786.449	-0.27376	0.13528	-2.02365	0.0430063	0.0997066
CG15773	2.70061	0.172008	1.23267	0.13954	0.889023	0.932382
CG15784	182.527	-0.415793	0.458305	-0.907241	0.36428	0.509177
CG15817	1743.9	-0.244313	0.145034	-1.68452	0.0920815	0.182055
CG1582	462.993	0.166042	0.138768	1.19655	0.231482	0.366638
CG15824	4.24587	0.863085	1.02413	0.842753	0.399367	0.54328
CG15861	32.0013	0.631954	0.400031	1.57976	0.114161	0.215368
CG15863	57.6169	0.395691	0.298254	1.32669	0.184612	0.310895
CG15864	37.1769	0.640565	0.37126	1.72538	0.0844587	0.170377
CG15870	4.43449	0.912081	0.991146	0.920228	0.357454	0.502469
CG15877	57.2873	0.452415	0.340838	1.32736	0.184389	0.310718
CG15879	5.12385	1.872	1.04458	1.79212	0.0731145	0.152234
CG15881	175.171	-0.0452742	0.19868	-0.227875	0.819743	0.886775
CG15891	272.847	-0.166808	0.175112	-0.952582	0.340802	0.485109
CG15892	7.96331	-0.24858	0.801978	-0.309958	0.756593	0.841585
CG15909	6.3655	-1.94108	1.11272	-1.74445	0.0810802	0.164971
CG15912	116.853	-0.204186	0.238813	-0.855003	0.39255	0.537378
CG15914	31.1275	0.746761	0.58336	1.2801	0.200509	0.330669
CG15916	260.258	-0.195716	0.154398	-1.26761	0.204939	0.335605
CG15922	82.5156	-0.230352	0.242209	-0.951044	0.341582	0.485886
CG15923	37.0989	0.0104316	0.355638	0.029332	0.9766	0.985787
CG15927	14.4059	-0.763644	0.627339	-1.21728	0.223499	0.357404
CG1597	742.361	-0.15643	0.167511	-0.933852	0.35038	0.495156
CG1598	554.132	0.239231	0.142168	1.68273	0.092427	0.182568
CG1603	221.532	0.0693495	0.165807	0.418254	0.675762	0.782155
CG1620	429.486	0.379033	0.226928	1.67028	0.0948647	0.186482
CG1632	3.0493	-0.13179	1.21061	-0.108862	0.913312	0.946732
CG1635	743.229	-0.0905574	0.124359	-0.728194	0.466495	0.607164
CG1637	2254.84	0.0135178	0.118663	0.113918	0.909303	0.944789
CG1638	16.9643	-0.151855	0.508279	-0.298762	0.765121	0.847272
CG1646	2785.57	0.241342	0.173244	1.39308	0.163597	0.284015
CG1647	416.497	0.0157318	0.161564	0.097372	0.922431	0.953023
CG1648	1987.14	0.314314	0.167703	1.87423	0.0608992	0.13166
CG1657	2716.54	-0.23174	0.133098	-1.74112	0.0816621	0.165901
CG1663	101.781	0.00588106	0.232685	0.0252748	0.979836	0.987645
CG16700	583.168	0.144316	0.173281	0.832842	0.404934	0.549235
CG1671	208.083	0.300617	0.182925	1.64339	0.100302	0.194436
CG16711	3050.52	0.0822392	0.178022	0.46196	0.64411	0.757906
CG16717	430.917	0.220001	0.138321	1.59052	0.111718	0.211888
CG16734	59.2793	0.276241	0.316629	0.872446	0.382965	0.527905
CG16736	2.88413	0.569599	1.41915	0.401365	0.688151	0.791236
CG16742	485.038	-0.247478	0.178597	-1.38568	0.165845	0.287027
CG16749	49.027	0.676659	0.447926	1.51065	0.130878	0.239009
CG1677	2613.62	-0.13003	0.174963	-0.743186	0.457369	0.599091
CG16771	192.539	0.294005	0.230345	1.27637	0.201825	0.332041
CG16772	176.275	0.834123	0.504075	1.65476	0.0979731	0.191142
CG16782	2.62035	-1.34359	1.59116	-0.844406	0.398442	0.542439
CG16787	237.905	-0.0835049	0.213446	-0.391223	0.695632	0.796691
CG16789	339.865	0.548077	0.26203	2.09166	0.0364693	0.0867472
CG16790	63.3493	0.197735	0.299403	0.66043	0.508978	0.646137
CG16798	16.551	-0.703643	0.579714	-1.21378	0.224833	0.358835
CG16812	407.559	0.35355	0.160172	2.20731	0.0272924	0.0686055
CG16820	88.255	0.183796	0.482908	0.380602	0.703498	0.802369
CG16825	2.80122	-1.50734	1.37827	-1.09364	0.274113	0.414683
CG16833	2233.84	-0.370824	0.160471	-2.31085	0.0208409	0.0550867
CG16837	3.16361	-2.62112	2.3054	-1.13695	0.255561	0.392883
CG16838	53.0922	0.290071	0.322214	0.900245	0.36799	0.512945
CG16863	115	0.252724	0.246083	1.02699	0.304426	0.447107
CG16879	3.98789	0.635248	1.30658	0.486193	0.626831	0.74367
CG1688	1218.12	-0.0732618	0.181717	-0.403164	0.686828	0.790313
CG16892	137.829	-0.16599	0.210498	-0.788559	0.43037	0.574277
CG16896	278.85	0.114005	0.152247	0.748816	0.453968	0.596254
CG16908	159.063	-0.296502	0.205842	-1.44044	0.149744	0.265697
CG16935	649.486	-0.227896	0.161248	-1.41333	0.157559	0.276106
CG16940	779.56	-0.206327	0.132488	-1.55733	0.119393	0.223121
CG16941	493.073	0.36651	0.163964	2.23531	0.0253968	0.0645585
CG16953	2939.52	-0.0406189	0.148629	-0.273291	0.78463	0.862403
CG16959	18.8663	0.164161	0.543559	0.302012	0.762643	0.845487
CG16972	557.957	-0.214933	0.147547	-1.45671	0.145196	0.259666
CG16978	17.6131	0.116605	0.754801	0.154484	0.877228	0.924942
CG16979	264.641	0.140496	0.158084	0.888742	0.374142	0.518986
CG1698	71.7052	-1.24328	0.829281	-1.49923	0.133814	0.243035
CG16984	6.34298	-1.10207	0.828785	-1.32975	0.183602	0.309709
CG16985	72.6881	0.319992	0.271286	1.17954	0.238185	0.373853
CG16986	262.77	0.00386271	0.202239	0.0190997	0.984762	0.990837
CG16989	457.764	0.2374	0.144406	1.64398	0.100181	0.19434
CG17005	14.3762	0.192853	0.657445	0.293337	0.769264	0.850707
CG17019	740.112	-0.0581926	0.169873	-0.342565	0.731926	0.823649
CG17026	255.614	0.118978	0.229645	0.518095	0.604392	0.725804
CG17027	166.985	0.163289	0.281993	0.579054	0.562553	0.690308
CG17028	21.9119	0.048114	0.541021	0.0889318	0.929136	0.957251
CG17029	472.316	-0.328756	0.18373	-1.78934	0.0735604	0.152892
CG1703	413.88	0.410838	0.201856	2.0353	0.0418206	0.0974254
CG17030	5.98649	-3.19733	1.86319	-1.71605	0.0861534	0.172844
CG17032	92.8017	0.591547	0.462762	1.2783	0.201145	0.331384
CG17047	11.5297	0.286808	0.744585	0.385191	0.700096	0.799948
CG17048	4.55469	-2.74949	1.80935	-1.5196	0.128611	0.236155
CG17059	365.378	0.34497	0.227071	1.51922	0.128708	0.236266
CG17068	288.148	0.242799	0.15475	1.56898	0.116653	0.219174
CG17078	578.531	0.101339	0.115866	0.874626	0.381778	0.526841
CG17104	4.85515	-2.20634	1.6032	-1.37621	0.168756	0.290738
CG17111	125.761	-0.0608804	0.284442	-0.214035	0.83052	0.89361
CG17118	8.404	0.508779	0.748902	0.679367	0.496905	0.635979
CG17122	21.4549	-0.497755	0.492509	-1.01065	0.312183	0.45526
CG17127	2.90161	1.51434	1.32027	1.147	0.251383	0.388597
CG17129	31.5648	0.649145	0.46624	1.3923	0.163832	0.284284
CG17141	79.3546	0.263195	0.249574	1.05458	0.29162	0.433876
CG17150	22.8446	0.672034	0.58049	1.1577	0.246985	0.383782
CG17159	4.95852	-0.387183	0.91447	-0.423396	0.672006	0.779081
CG17162	36.638	-1.02448	0.481779	-2.12645	0.0334656	0.0812213
CG17163	422.061	-0.00077389	0.147229	-0.00525639	0.995806	0.997308
CG17168	480.981	0.278963	0.198007	1.40886	0.158878	0.278049
CG17169	10.6599	1.45282	0.675544	2.1506	0.0315078	0.0770755
CG17177	4.20164	-1.66053	1.07599	-1.54326	0.122769	0.228086
CG17180	175.573	0.0227832	0.246494	0.0924293	0.926357	0.955609
CG17186	58.2326	0.442474	0.363449	1.21743	0.22344	0.357399
CG17189	3.91525	2.57205	1.55808	1.65078	0.0987841	0.192336
CG17190	26.5901	0.150407	0.442447	0.339944	0.733899	0.824786
CG17202	230.642	0.215818	0.189622	1.13815	0.255058	0.392579
CG17207	3.34064	1.23596	1.33955	0.922667	0.356181	0.501473
CG17209	243.093	0.222334	0.159422	1.39462	0.16313	0.283368
CG17211	3.97596	0.313672	1.49317	0.210072	0.833612	0.895676
CG1722	18.2056	-1.26468	0.606808	-2.08415	0.0371463	0.0879637
CG17221	236.224	0.0812502	0.182558	0.445065	0.656273	0.767922
CG17230	484.102	0.101784	0.167412	0.607984	0.543198	0.67389
CG17233	925.868	-0.0941462	0.147731	-0.637282	0.523941	0.657914
CG17249	157.141	-0.176728	0.193361	-0.913982	0.360726	0.505629
CG17258	6.86445	1.0346	0.806202	1.2833	0.199387	0.329408
CG17260	85.9018	0.202263	0.253253	0.798662	0.424486	0.568282
CG17264	33.593	-0.210232	0.473664	-0.443842	0.657157	0.768323
CG17266	28.6811	0.872304	0.438831	1.98779	0.0468347	0.106628
CG17270	578.346	-0.269301	0.140884	-1.91151	0.0559393	0.123108
CG17272	260.1	-0.0542675	0.204545	-0.265309	0.790772	0.867532
CG17278	218.868	0.1994	0.191746	1.03992	0.298378	0.44109
CG17279	4.19066	-0.084903	1.02623	-0.0827328	0.934064	0.959814
CG17323	208.718	-0.26078	0.191047	-1.365	0.172252	0.29523
CG17328	93.836	0.0270566	0.236431	0.114437	0.908891	0.944454
CG17343	48.2981	-0.0531549	0.361191	-0.147165	0.883001	0.928358
CG17350	4.55159	-2.10841	1.07102	-1.9686	0.0489989	0.110701
CG17359	97.8731	0.504195	0.224409	2.24677	0.0246545	0.0630943
CG17361	65.0708	0.737769	0.352373	2.09371	0.0362855	0.0863874
CG1737	905.824	-0.110365	0.124564	-0.886006	0.375615	0.520704
CG17374	30.3191	0.371591	0.423501	0.877428	0.380254	0.525455
CG17376	9.3608	-2.4268	1.88143	-1.28987	0.197096	0.326893
CG17377	6.16895	-1.15113	1.81708	-0.633504	0.526405	0.659884
CG1738	57.4088	-0.109007	0.324038	-0.336404	0.736567	0.8264
CG17385	713.223	0.0387982	0.128118	0.302832	0.762018	0.844981
CG17386	81.9127	-1.09604	0.547173	-2.0031	0.0451663	0.103517
CG17387	7.64664	0.235502	0.955861	0.246377	0.805391	0.877504
CG17440	7.65033	0.0225469	0.820295	0.0274863	0.978072	0.986323
CG17450	3.3286	0.626916	1.15831	0.541234	0.588346	0.712723
CG17454	873.169	0.197827	0.125147	1.58075	0.113935	0.215093
CG17470	3.12992	-0.446609	1.29443	-0.345022	0.730078	0.822266
CG17486	927.347	0.21665	0.185572	1.16747	0.24302	0.379146
CG1749	164.148	0.475547	0.228128	2.08456	0.037109	0.0879014
CG17493	2405.12	-0.0438597	0.121828	-0.360012	0.718839	0.815052
CG1750	82.4446	0.151887	0.29752	0.510512	0.609693	0.730847
CG17508	2250.01	0.343985	0.20173	1.70518	0.0881616	0.17581
CG17514	7425.55	0.0726964	0.202166	0.359587	0.719156	0.815325
CG17528	1633.11	0.171922	0.123928	1.38727	0.16536	0.286327
CG17556	207.791	0.326953	0.19291	1.69485	0.0901034	0.179018
CG17565	476.544	0.353996	0.156728	2.25866	0.0239044	0.0615602
CG17568	251.738	-0.0369488	0.158422	-0.233231	0.815582	0.884117
CG17572	3.84904	2.10696	1.29868	1.62238	0.104723	0.201206
CG17593	702.38	0.333509	0.146552	2.2757	0.022864	0.0592705
CG17598	899.059	-0.161523	0.109369	-1.47687	0.139712	0.251723
CG17599	2.79834	1.03384	1.4666	0.704923	0.480858	0.620751
CG17600	177.17	-0.035938	0.201196	-0.178622	0.858235	0.911794
CG17612	121.741	0.133711	0.255897	0.522518	0.60131	0.723411
CG17637	5.91595	-0.0267362	1.18966	-0.0224738	0.98207	0.989147
CG17646	999.241	0.363274	0.171042	2.12389	0.0336795	0.0816285
CG17650	6.71487	1.26932	0.94659	1.34094	0.179939	0.30535
CG17652	102.705	-0.0595622	0.242588	-0.245528	0.806047	0.87813
CG17660	684.075	0.0268294	0.123715	0.216865	0.828313	0.892049
CG17669	10.7856	-0.581756	0.670927	-0.867093	0.385891	0.531227
CG17680	736.422	-0.187779	0.145434	-1.29116	0.196647	0.32625
CG17683	1427.74	0.221982	0.105818	2.09777	0.0359257	0.0858965
CG17712	218.494	0.000358961	0.215417	0.00166635	0.99867	0.999141
CG17721	58.7623	0.229606	0.281982	0.814258	0.415497	0.559225
CG17726	114.979	0.684584	0.310985	2.20134	0.027712	0.0695124
CG1773	9.74214	1.23535	0.948502	1.30243	0.192771	0.321249
CG17738	9.34051	0.460946	1.25312	0.36784	0.712992	0.80998
CG17739	1042.72	0.543535	0.231958	2.34325	0.0191166	0.0512299
CG17746	465.213	-0.330021	0.157534	-2.09492	0.0361781	0.0862671
CG17776	104.458	0.0678893	0.224907	0.301855	0.762763	0.845487
CG17777	24.4837	-0.728698	0.479847	-1.5186	0.128862	0.236466
CG17786	49.5732	-1.10288	0.581228	-1.8975	0.0577621	0.12636
CG17801	17.1159	0.00185958	0.616782	0.00301498	0.997594	0.998613
CG17802	150.518	0.508993	0.242409	2.09973	0.0357526	0.0856175
CG17803	289.684	0.0598405	0.153664	0.389424	0.696963	0.797328
CG17806	179.796	0.261452	0.278432	0.939016	0.347723	0.492149
CG17807	180.715	0.285565	0.18512	1.54259	0.12293	0.228222
CG17829	255.873	-0.04854	0.14992	-0.323773	0.74611	0.833606
CG17834	43.0637	-0.628058	0.383364	-1.63828	0.101363	0.196027
CG17840	305.697	0.194205	0.155554	1.24847	0.211858	0.343599
CG17841	3953.35	0.137382	0.0886344	1.54999	0.121144	0.225458
CG17843	2.93274	0.571971	1.22502	0.466906	0.640567	0.754574
CG1785	176.644	0.328798	0.218798	1.50275	0.132904	0.241711
CG17855	7.66888	1.85677	0.896973	2.07004	0.0384485	0.0904024
CG17883	1673.75	-0.184577	0.131373	-1.40499	0.160025	0.279596
CG17896	2524.45	0.0343453	0.169713	0.202372	0.839626	0.899218
CG1791	3.7035	0.499946	1.13081	0.442111	0.658409	0.768896
CG17912	3087.57	-0.37836	0.196446	-1.92603	0.0541012	0.119808
CG1792	140.134	0.301989	0.197354	1.53019	0.125969	0.23224
CG17931	86.7056	0.691556	0.318584	2.17072	0.0299526	0.0740296
CG17977	456.466	-0.254298	0.152206	-1.67075	0.0947714	0.186367
CG17982	149.73	-0.1311	0.235547	-0.556576	0.577817	0.703675
CG17985	238.156	0.06099	0.171521	0.355584	0.722152	0.817359
CG17994	3.02411	0.13715	1.2873	0.106541	0.915153	0.947788
CG17996	118.119	-0.0929977	0.244172	-0.380871	0.703299	0.802228
CG18004	171.686	0.153556	0.213118	0.72052	0.471205	0.611559
CG18011	258.004	-0.162627	0.169713	-0.958245	0.337939	0.482212
CG18012	238.158	-0.0242613	0.207441	-0.116956	0.906895	0.943487
CG18031	4.33127	2.74062	1.294	2.11795	0.0341796	0.0826176
CG18048	117.636	0.223246	0.25365	0.880135	0.378786	0.523848
CG1806	11.9233	-0.460252	0.652293	-0.70559	0.480443	0.620538
CG18088	5.74865	-1.79009	0.980808	-1.82512	0.0679837	0.143409
CG1809	8.58631	-0.184913	0.786107	-0.235227	0.814033	0.882845
CG18094	21.6847	-0.290031	0.46533	-0.62328	0.533101	0.665155
CG18095	7.15661	-0.444311	0.933419	-0.476004	0.634072	0.749916
CG1812	1229.27	0.204919	0.201989	1.01451	0.310341	0.453287
CG18135	3866.94	0.330729	0.151195	2.18744	0.0287108	0.0714775
CG18136	2.86307	-0.882729	1.25271	-0.704656	0.481025	0.620815
CG1814	1787.94	-0.139968	0.0849965	-1.64675	0.0996094	0.193513
CG1815	1307.8	-0.11766	0.153736	-0.765338	0.44407	0.58707
CG18155	5.23952	-0.815402	1.10578	-0.737402	0.460878	0.602276
CG18171	120.231	-0.199675	0.267378	-0.74679	0.455191	0.59749
CG18178	155.234	0.442757	0.220151	2.01116	0.044309	0.101992
CG18180	4.77079	-0.11398	1.25449	-0.0908577	0.927606	0.956416
CG18233	9.01429	-0.984765	0.827038	-1.19071	0.233767	0.369209
CG18234	5.58527	-0.681217	0.941825	-0.723294	0.469499	0.610165
CG1824	459.903	0.118491	0.173817	0.681701	0.495428	0.634695
CG18259	170.471	0.174103	0.208984	0.833092	0.404793	0.549185
CG18262	73.3806	0.13085	0.274564	0.476575	0.633665	0.749601
CG18268	7.24507	-0.828845	0.776141	-1.06791	0.285563	0.42756
CG1827	137.232	0.573448	0.30076	1.90666	0.0565641	0.124312
CG18273	236.23	0.151445	0.189314	0.799964	0.423732	0.56763
CG18278	22.9782	1.00707	0.478656	2.10396	0.0353822	0.0847881
CG18281	9.33976	-1.96853	1.19606	-1.64584	0.0997963	0.193774
CG18292	210.312	-0.267278	0.175385	-1.52395	0.127522	0.234492
CG18304	23.1628	-0.898584	0.473535	-1.89761	0.0577478	0.126355
CG18324	205.67	-0.115268	0.19092	-0.603752	0.546009	0.676414
CG18327	43.0836	0.746633	0.344146	2.16953	0.0300428	0.074168
CG18335	5.32638	-0.535305	1.08264	-0.494444	0.620992	0.739552
CG18336	60.8577	0.427801	0.339134	1.26145	0.207146	0.338132
CG18343	99.7022	0.341928	0.243566	1.40384	0.160366	0.279776
CG18367	14.0441	0.408142	0.611827	0.667087	0.504716	0.642363
CG18368	22.6603	-0.792785	0.802957	-0.987331	0.32348	0.46721
CG18371	4.91362	-0.327744	1.00854	-0.324968	0.745205	0.833121
CG1840	132.414	0.00406137	0.244093	0.0166386	0.986725	0.992048
CG18420	10.3042	-1.24612	0.708499	-1.75881	0.0786093	0.16093
CG18476	359.686	0.0343882	0.140796	0.244242	0.807044	0.878764
CG18507	76.7725	0.0538681	0.303641	0.177408	0.859188	0.912168
CG18508	288.853	-0.0994297	0.220161	-0.451622	0.651541	0.764395
CG18519	5.22738	1.10185	1.03522	1.06436	0.287167	0.429296
CG18528	76.7549	-0.390828	0.376014	-1.0394	0.29862	0.441273
CG18536	4.55038	2.26376	1.19403	1.8959	0.0579731	0.126744
CG18563	6.8174	-0.558524	0.795852	-0.701794	0.482808	0.622453
CG18596	280.495	-0.0625005	0.166607	-0.375138	0.707558	0.805701
CG18598	78.0751	-0.512727	0.279166	-1.83664	0.0662633	0.14053
CG18599	32.0167	-0.152413	0.382373	-0.398599	0.690189	0.792807
CG18600	106.786	0.300111	0.229159	1.30962	0.190326	0.318399
CG18619	558.678	-0.0170438	0.190163	-0.0896271	0.928584	0.95696
CG18628	28.1705	0.454448	0.704895	0.644704	0.519119	0.654474
CG18635	2.95348	-0.0739927	1.24755	-0.0593103	0.952705	0.971545
CG18636	6.28492	-1.247	0.883877	-1.41083	0.158294	0.277119
CG18643	65.7969	0.21138	0.283879	0.744612	0.456506	0.598626
CG18659	1207.95	-0.0560502	0.129149	-0.433997	0.66429	0.773343
CG18661	139.394	-0.199577	0.199697	-0.999398	0.317602	0.46041
CG18662	3.9283	-0.966364	1.42638	-0.677496	0.498091	0.636806
CG18731	161.172	-0.290276	0.247407	-1.17327	0.240686	0.376555
CG18744	2.4379	0.819071	1.41367	0.579393	0.562324	0.690187
CG18764	63.319	-0.308272	0.319295	-0.965478	0.334305	0.478551
CG18766	785.105	-0.131293	0.156179	-0.840657	0.40054	0.544388
CG18769	1025.81	-0.325504	0.161315	-2.01781	0.0436112	0.100845
CG18787	11.6168	0.837147	0.682121	1.22727	0.219721	0.352795
CG18789	13.8255	0.396717	0.654344	0.606282	0.544327	0.674882
CG18815	2033.71	-0.281597	0.119868	-2.34922	0.0188126	0.0505394
CG18870	346.721	-0.350498	0.153864	-2.27797	0.0227281	0.0590463
CG1889	15.5806	0.0559252	0.667936	0.0837285	0.933272	0.959372
CG1907	1072.99	-0.417117	0.18955	-2.20056	0.0277672	0.0696015
CG1910	1178.9	0.0768181	0.13183	0.582707	0.560091	0.688241
CG1941	31.5518	-0.568094	0.485735	-1.16956	0.24218	0.378334
CG1942	14.1544	-1.62504	0.708805	-2.29264	0.0218686	0.0571207
CG1968	307.328	0.331925	0.205088	1.61845	0.105566	0.202387
CG1969	283.615	-0.070469	0.147311	-0.478368	0.632388	0.748424
CG1970	4440.42	-0.195217	0.0858307	-2.27444	0.0229396	0.0594504
CG1971	32.5038	0.838444	0.397275	2.11048	0.0348166	0.0836591
CG1983	531.627	0.110115	0.118456	0.929588	0.352584	0.497609
CG1999	2.9763	-2.00681	1.68496	-1.19101	0.233648	0.369077
CG2003	27.4177	0.313609	0.49688	0.631157	0.527938	0.660809
CG2010	20.8019	-0.531379	0.49895	-1.06499	0.286879	0.428986
CG2016	2393.45	0.177083	0.175116	1.01123	0.311905	0.454946
CG2021	69.985	0.0975881	0.290339	0.336118	0.736782	0.8264
CG2022	10.0214	-0.386939	0.69403	-0.557525	0.577169	0.703046
CG2023	120	0.265364	0.220937	1.20109	0.229718	0.364767
CG2025	639.708	-0.0391968	0.150087	-0.26116	0.793969	0.869788
CG2034	145.74	0.300107	0.207875	1.44369	0.148825	0.264635
CG2046	180.794	0.166657	0.180348	0.924088	0.35544	0.500642
CG2051	394.406	-0.141746	0.145674	-0.973031	0.330538	0.474693
CG2053	5.6215	-0.646075	1.32548	-0.487427	0.625956	0.74313
CG2061	659.463	0.17455	0.110415	1.58085	0.113913	0.215089
CG2064	166.103	0.385585	0.202116	1.90774	0.0564253	0.124075
CG2091	217.756	0.0825017	0.180078	0.458145	0.646849	0.760287
CG2100	131.016	0.18186	0.212539	0.855655	0.392189	0.537023
CG2116	212.189	0.171003	0.228562	0.748168	0.454359	0.596694
CG2121	5.82553	0.157646	1.01342	0.155558	0.876382	0.924385
CG2124	165.382	0.299232	0.253519	1.18032	0.237875	0.373477
CG2126	244.718	-0.0415989	0.170163	-0.244465	0.806871	0.878764
CG2127	5.34633	0.459503	2.05426	0.223683	0.823004	0.888682
CG2129	61.4319	0.664496	0.289374	2.29632	0.0216574	0.0566665
CG2137	3.37235	0.107671	1.20592	0.089285	0.928855	0.957147
CG2144	358.694	-0.32616	0.162061	-2.01257	0.0441594	0.10178
CG2145	634.51	-0.0874385	0.690414	-0.126647	0.89922	0.937742
CG2147	80.5529	0.27313	0.263317	1.03727	0.299611	0.442025
CG2157	16.5436	-0.80648	0.590307	-1.3662	0.171875	0.294774
CG2162	1369.73	-0.298117	0.14569	-2.04623	0.0407333	0.0951638
CG2182	948.424	0.184085	0.190163	0.968041	0.333024	0.477231
CG2200	142.577	0.554311	0.240524	2.3046	0.0211889	0.0557567
CG2201	942.569	-0.284787	0.144167	-1.97539	0.048224	0.109229
CG2202	326.213	0.198668	0.136107	1.45965	0.144387	0.258525
CG2211	118.556	0.227876	0.213018	1.06975	0.284731	0.42692
CG2218	503.446	0.342989	0.149301	2.29729	0.0216023	0.0565642
CG2224	338.152	-0.173131	0.175757	-0.985058	0.324596	0.468376
CG2246	1101.54	-0.182091	0.0969159	-1.87885	0.0602649	0.130572
CG2247	542.741	0.0724176	0.153494	0.471794	0.637074	0.752712
CG2256	19.6326	0.327704	0.539017	0.607966	0.54321	0.67389
CG2260	121.754	0.290205	0.247496	1.17256	0.240971	0.376834
CG2263	281.195	0.361097	0.201867	1.78879	0.0736492	0.153047
CG2267	3.40852	-1.85231	1.90542	-0.972125	0.330988	0.475135
CG2269	22917	-0.150321	0.137943	-1.08973	0.275832	0.416749
CG2277	839.53	-0.530362	0.261297	-2.02973	0.0423842	0.0985008
CG2278	896.397	-0.113112	0.124718	-0.906941	0.364438	0.509264
CG2292	88.2573	0.186197	0.246033	0.756799	0.44917	0.591268
CG2310	41.2909	0.54985	0.357317	1.53883	0.123846	0.229273
CG2321	64.2803	0.428612	0.306527	1.39829	0.162027	0.281889
CG2371	276.777	0.168178	0.151352	1.11117	0.266494	0.405816
CG2444	17.3731	0.291931	0.638307	0.457352	0.647418	0.760788
CG2469	2908.73	0.243897	0.173898	1.40253	0.160756	0.280367
CG2540	153.944	0.142137	0.206284	0.689037	0.4908	0.630139
CG2543	51.4165	0.022913	0.296062	0.0773926	0.938311	0.962702
CG2556	35.6034	0.482386	0.413719	1.16598	0.243624	0.379921
CG2608	301.437	-0.178599	0.183384	-0.973909	0.330102	0.474195
CG2611	85.033	0.216522	0.295077	0.733781	0.463082	0.604043
CG2614	168.709	0.227256	0.198498	1.14487	0.252262	0.389559
CG2616	3.37245	0.401724	1.30179	0.308595	0.75763	0.842092
CG2617	44.18	0.209884	0.40785	0.514612	0.606824	0.727819
CG2641	14.0442	1.26742	0.616385	2.05622	0.0397616	0.0932423
CG2652	2.3868	0.23124	1.29706	0.17828	0.858503	0.911904
CG2656	124.025	0.234523	0.234172	1.0015	0.316586	0.459502
CG2658	526.188	0.311368	0.225164	1.38285	0.166711	0.287963
CG2662	96.4818	0.435073	0.241315	1.80292	0.0714001	0.149141
CG2678	14.4484	0.747855	0.567917	1.31684	0.187892	0.315188
CG2680	460.358	0.0254812	0.199274	0.12787	0.898252	0.937252
CG2685	251.824	0.321389	0.224559	1.4312	0.152373	0.269372
CG2691	584.321	0.0436358	0.173856	0.250988	0.801823	0.874866
CG2694	70.5413	0.333523	0.293119	1.13784	0.255187	0.392592
CG2698	2021.51	-0.301966	0.140357	-2.15142	0.0314429	0.0770067
CG2701	532.147	0.184235	0.202402	0.910244	0.362694	0.507625
CG2709	3.90501	3.30351	1.55678	2.12202	0.0338362	0.0819147
CG2712	102.904	0.53222	0.231302	2.30098	0.021393	0.056127
CG2750	5.13344	0.720041	0.936601	0.768781	0.442023	0.585269
CG2772	13.5479	-0.0356805	0.646048	-0.0552289	0.955956	0.972806
CG2781	170.823	-0.503965	0.59878	-0.841653	0.399982	0.544047
CG2790	372.251	0.245185	0.228687	1.07214	0.283657	0.425758
CG2794	94.2834	0.520649	0.269512	1.93182	0.0533814	0.118535
CG2807	901.827	0.182592	0.1333	1.36978	0.170757	0.29346
CG2812	51.821	-0.689137	0.343262	-2.00761	0.0446843	0.10271
CG2816	11.5254	0.89364	0.671543	1.33073	0.183279	0.309485
CG2818	639.249	-0.233188	0.136009	-1.71451	0.0864355	0.173148
CG2837	8.2983	-0.50394	0.766868	-0.65714	0.511091	0.647968
CG2846	236.573	0.218855	0.164412	1.33113	0.183145	0.309357
CG2854	2.43684	-0.831395	1.37072	-0.606539	0.544157	0.67475
CG2861	7.56907	-0.573612	0.917455	-0.62522	0.531827	0.66429
CG2875	118.519	0.307355	0.313586	0.980129	0.327023	0.470982
CG2889	389.988	0.215933	0.167017	1.29288	0.196053	0.325519
CG2898	10.7485	-0.80045	0.870755	-0.919259	0.35796	0.502991
CG2906	223.745	-0.106698	0.179723	-0.593683	0.552724	0.682188
CG2909	172.764	-0.0682188	0.198235	-0.34413	0.730748	0.82276
CG2911	51.8288	0.207923	0.323469	0.64279	0.52036	0.655464
CG2921	454.267	-0.116706	0.122684	-0.951276	0.341464	0.485787
CG2926	2748.75	-0.232773	0.157849	-1.47465	0.140307	0.252495
CG2930	115.318	0.19314	0.224179	0.861543	0.388939	0.533886
CG2931	217.92	0.199706	0.19164	1.04209	0.297368	0.440087
CG2938	723.595	0.0808588	0.180858	0.447084	0.654815	0.766852
CG2941	120.592	-0.18727	0.211535	-0.88529	0.376	0.520784
CG2955	3.448	0.338485	1.86826	0.181176	0.856229	0.910288
CG2974	78.1686	0.36949	0.301012	1.22749	0.219637	0.352715
CG2976	245.653	0.426167	0.185537	2.29694	0.0216224	0.0566029
CG2982	169.869	0.253136	0.200393	1.2632	0.206518	0.337722
CG2993	5769.64	-0.273445	0.139778	-1.95628	0.0504325	0.113337
CG30001	16.6378	0.239419	0.593589	0.403341	0.686697	0.790249
CG30007	625.623	-0.0548387	0.165572	-0.331208	0.740488	0.828806
CG30008	9.08988	-0.130766	0.830679	-0.15742	0.874914	0.923143
CG30015	2540.56	-0.137244	0.118678	-1.15644	0.2475	0.384286
CG30020	903.287	-0.172613	0.134043	-1.28775	0.197834	0.327861
CG30039	4.34526	-3.17453	1.64878	-1.92538	0.0541814	0.11996
CG30053	59.5065	-0.491887	0.319664	-1.53876	0.123863	0.229273
CG30056	7.36733	-0.0651708	0.762205	-0.085503	0.931861	0.958805
CG30059	2.54407	-0.631415	1.47945	-0.426791	0.669532	0.777241
CG30060	11.0002	-0.301056	0.680134	-0.442643	0.658024	0.768804
CG30062	5.44966	-1.09762	0.955457	-1.14879	0.250645	0.387772
CG3008	471.492	-0.174981	0.195831	-0.893529	0.371574	0.516721
CG30094	120.587	-0.240687	0.246623	-0.975932	0.329098	0.473521
CG30096	90.2395	-0.00404776	0.266074	-0.0152129	0.987862	0.992419
CG30105	33.361	0.288989	0.370285	0.780452	0.435125	0.578803
CG30108	20.0904	-0.432737	0.492466	-0.878715	0.379556	0.524729
CG30109	120.631	0.0894104	0.223165	0.400648	0.688679	0.791586
CG30122	2666.2	0.154665	0.199156	0.776599	0.437395	0.58117
CG3014	29.9035	-0.492649	0.427949	-1.15119	0.249656	0.386716
CG30152	380.985	-0.150845	0.183627	-0.821476	0.411375	0.555207
CG30154	5.43055	1.14856	0.943091	1.21787	0.223275	0.357313
CG30156	52.0801	-0.282649	0.331061	-0.853767	0.393234	0.537969
CG30157	21.2247	0.639868	0.485289	1.31853	0.187326	0.31447
CG30172	1227.24	-0.159769	0.155956	-1.02445	0.305623	0.448133
CG30185	409.966	0.186081	0.142402	1.30673	0.191305	0.319444
CG30187	36.3046	0.846862	0.405087	2.09057	0.0365669	0.0869406
CG30195	4.93078	-1.07758	1.07814	-0.999481	0.317562	0.46041
CG3021	165.426	0.261936	0.195491	1.33989	0.180282	0.305834
CG30271	43.5571	0.189287	0.334679	0.565577	0.571681	0.698043
CG30274	18.4061	0.38521	0.506608	0.760372	0.447032	0.589257
CG30280	5.96813	-2.07822	1.05808	-1.96414	0.0495134	0.111649
CG30281	7.33291	-2.02419	1.12874	-1.79331	0.0729229	0.151984
CG3032	49.2751	0.67347	0.324094	2.07801	0.0377084	0.0890963
CG30323	23.1098	-0.398192	0.47223	-0.843216	0.399108	0.543067
CG30324	7.28411	0.684273	0.93996	0.727981	0.466625	0.607248
CG30334	9.19826	-3.56554	1.58087	-2.25543	0.0241065	0.0619577
CG30338	27.4422	-0.249041	0.401544	-0.620209	0.53512	0.666969
CG30343	18.1248	-0.325433	0.534717	-0.608607	0.542785	0.673785
CG30344	419.767	-0.221426	0.164633	-1.34497	0.178635	0.30372
CG30345	74.2504	-0.632207	0.317626	-1.99041	0.0465457	0.106083
CG30350	5.46638	-4.1386	1.99434	-2.07517	0.0379704	0.0895558
CG30354	7.9074	-1.14172	1.00186	-1.1396	0.254455	0.392034
CG30356	9.77265	0.127258	0.921779	0.138057	0.890195	0.932869
CG30357	66.598	-0.0287899	0.380221	-0.075719	0.939643	0.963683
CG30373	205.474	0.372849	0.190097	1.96136	0.0498368	0.112212
CG30376	2.37432	1.5518	1.63976	0.946358	0.343966	0.488561
CG30377	19.8864	0.0981007	0.484276	0.202572	0.83947	0.899142
CG30379	2.38973	3.40695	1.74746	1.94966	0.0512166	0.114711
CG3038	8.14309	-0.352838	0.75474	-0.467496	0.640145	0.754411
CG30381	129.686	0.211943	0.193957	1.09273	0.274512	0.415168
CG30389	2579.27	-0.297894	0.150497	-1.97941	0.0477703	0.108432
CG30392	453.513	-0.19651	0.146307	-1.34314	0.179228	0.304582
CG30395	9.93049	0.0467021	0.845527	0.0552343	0.955952	0.972806
CG3040	354.909	0.0450356	0.179415	0.251014	0.801803	0.874866
CG30401	3.83926	-0.978524	1.10668	-0.8842	0.376588	0.521305
CG30415	1996.51	0.0998164	0.148205	0.673502	0.500628	0.638513
CG30423	643.798	-0.11401	0.169341	-0.673261	0.500781	0.638607
CG30424	207.003	-0.0819612	0.192051	-0.426767	0.669549	0.777241
CG30427	9.36431	0.505573	1.17689	0.429583	0.667499	0.775987
CG30428	515.517	-0.45404	0.368597	-1.23181	0.218021	0.350915
CG30430	3.97627	-1.51259	2.19189	-0.690087	0.49014	0.629519
CG30440	5.62332	0.655457	1.0647	0.615627	0.538141	0.669705
CG30441	5.49946	2.60795	1.1523	2.26326	0.0236199	0.0609755
CG3045	81.5841	0.253627	0.266588	0.951384	0.341409	0.485787
CG30456	43.6721	-0.497418	0.409529	-1.21461	0.224514	0.358535
CG30466	107.675	-0.065657	0.24641	-0.266454	0.78989	0.866928
CG30467	196.122	0.0437229	0.207648	0.210562	0.833229	0.895618
CG30486	5.137	1.2576	1.02668	1.22492	0.220605	0.353947
CG30491	252.127	0.291094	0.157782	1.84492	0.0650493	0.138425
CG30493	170.694	0.167931	0.205685	0.816449	0.414244	0.558157
CG30495	150.005	0.479776	0.254664	1.88395	0.0595712	0.129412
CG3061	2081.22	-0.174353	0.0855273	-2.03857	0.041493	0.0967472
CG3065	374.276	0.277036	0.13342	2.07643	0.0378547	0.0893225
CG3077	406.074	-0.0358325	0.126386	-0.283517	0.776781	0.856612
CG3078	2269.3	-0.205826	0.10232	-2.01159	0.0442627	0.101908
CG31007	7.2335	-1.97911	1.05285	-1.87977	0.0601396	0.13038
CG31008	2.72424	-5.08939	3.17507	-1.60292	0.108952	0.207716
CG31019	6.86674	1.70926	0.996814	1.71472	0.0863959	0.173148
CG31028	18.2366	-1.48134	0.656095	-2.25782	0.023957	0.0616411
CG31029	21.0685	0.868845	0.542011	1.603	0.108934	0.207716
CG31030	4879.51	-0.083346	0.155829	-0.534855	0.59275	0.716338
CG31038	332.666	-0.176349	0.171445	-1.02861	0.303665	0.446235
CG31051	250.226	-0.112577	0.224948	-0.500459	0.616752	0.736069
CG3107	3027.96	0.032806	0.156703	0.209351	0.834174	0.895676
CG31077	44.5678	3.55599	2.47219	1.4384	0.150321	0.266632
CG31087	2.78973	-2.45763	1.46853	-1.67353	0.0942221	0.185562
CG31100	332.387	0.0276522	0.252301	0.1096	0.912727	0.946355
CG31102	107.421	0.44615	0.268953	1.65884	0.0971477	0.18988
CG31103	61.2759	-0.539806	0.412623	-1.30823	0.190795	0.319004
CG31104	3.12375	-1.38502	1.21309	-1.14173	0.253565	0.390946
CG31109	216.326	0.100798	0.17311	0.582277	0.56038	0.688395
CG31111	90.888	0.0887067	0.255756	0.346842	0.72871	0.821423
CG31121	23.2188	-0.525429	0.523302	-1.00406	0.315348	0.458143
CG31125	142.881	0.114465	0.224833	0.50911	0.610675	0.731529
CG31126	189.045	0.234669	0.188147	1.24727	0.2123	0.344158
CG31142	62.2227	0.183015	0.322871	0.566836	0.570825	0.697152
CG31148	2.36326	-1.21864	1.37658	-0.885265	0.376014	0.520784
CG31156	391.493	0.177266	0.126848	1.39747	0.162273	0.282271
CG31174	26.0605	-0.63311	0.450764	-1.40453	0.160162	0.279623
CG31183	311.949	-0.111127	0.16073	-0.691386	0.489323	0.629003
CG31189	5.17002	-1.79029	1.15636	-1.54822	0.121569	0.226131
CG31195	370.923	-0.163542	0.154145	-1.06096	0.288707	0.43075
CG31199	20.9228	-0.495717	0.572688	-0.865597	0.386711	0.532198
CG31202	7.33725	-1.4152	0.969219	-1.46014	0.144251	0.258341
CG31207	17.7183	0.611165	0.773948	0.789673	0.429719	0.573625
CG31211	3737.49	-0.368329	0.22305	-1.65133	0.0986712	0.19221
CG31226	11.6998	-2.49402	1.77169	-1.40771	0.159218	0.278445
CG3124	6.18779	-0.277737	2.06836	-0.134279	0.893182	0.934253
CG31244	3.53999	0.234647	1.24229	0.188882	0.850185	0.90596
CG31245	2.85172	-1.52487	1.62129	-0.940527	0.346947	0.491351
CG31249	174.18	0.342836	0.185489	1.84828	0.0645619	0.137691
CG31251	91.6913	0.399541	0.248987	1.60467	0.108567	0.207318
CG31272	14.8112	1.41313	0.613873	2.302	0.0213355	0.0560151
CG31278	63.3253	0.453022	0.305715	1.48185	0.138381	0.249622
CG31288	26.8206	1.43131	0.700807	2.04237	0.0411146	0.0959702
CG31300	185	0.246348	0.295967	0.832349	0.405212	0.549543
CG31301	328.558	-0.0587476	0.178514	-0.329093	0.742086	0.830158
CG31320	92.8739	-0.327831	0.580233	-0.565	0.572074	0.698442
CG31321	27.3299	0.0643511	0.472514	0.136189	0.891672	0.933503
CG31344	1016.72	0.0758218	0.15354	0.493823	0.621431	0.739908
CG31360	222.639	0.24847	0.214861	1.15642	0.247509	0.384286
CG31365	173.738	0.188993	0.193792	0.975234	0.329444	0.47358
CG31368	545.113	0.28617	0.137729	2.07777	0.0377309	0.0891097
CG31371	3.62094	2.96608	1.53053	1.93795	0.0526296	0.117172
CG31380	11.2794	1.57452	0.957867	1.64378	0.100222	0.19434
CG31407	2.79691	-1.89851	1.98877	-0.954615	0.339773	0.484224
CG31414	203.511	0.432061	0.231474	1.86657	0.0619623	0.13335
CG31415	4.69297	0.504248	0.972235	0.518649	0.604006	0.725676
CG31427	2.82564	2.09393	1.50352	1.39269	0.163714	0.284125
CG31436	89.0323	0.387439	0.257675	1.50359	0.132686	0.241473
CG31441	71.4722	0.36843	0.263872	1.39625	0.162641	0.282771
CG31454	2.88445	0.309107	1.33612	0.231347	0.817045	0.885118
CG31460	52.594	0.704881	0.315235	2.23605	0.0253483	0.0644816
CG31467	25.0415	1.13258	0.519126	2.18171	0.0291307	0.0722689
CG31468	6.68467	-3.0179	1.76511	-1.70975	0.087312	0.174475
CG31469	20.2073	0.946627	0.528985	1.78952	0.0735316	0.152862
CG31472	337.138	0.37052	0.164491	2.25253	0.024289	0.0623393
CG31473	17.7101	-0.198706	0.565303	-0.351503	0.725211	0.819146
CG31477	5.71626	1.44593	0.928223	1.55774	0.119295	0.222992
CG31495	18.2965	0.487401	0.527404	0.924151	0.355408	0.500642
CG31510	822.408	-0.0424746	0.164094	-0.258844	0.795756	0.871116
CG31523	1135.47	-0.356533	0.276701	-1.28851	0.197568	0.327573
CG31550	1862.36	-0.173025	0.228021	-0.758813	0.447964	0.589754
CG3156	215.969	-0.140033	0.162683	-0.860776	0.389361	0.534279
CG3160	415.171	-0.147521	0.139722	-1.05582	0.291052	0.433153
CG31612	64.1059	-0.0831673	0.31909	-0.260639	0.794371	0.869869
CG31626	9.67437	1.06855	0.745615	1.43311	0.151825	0.268628
CG3163	196.833	-0.181507	0.203854	-0.890376	0.373264	0.518486
CG31633	152.607	0.0951285	0.188071	0.505813	0.612988	0.73339
CG31636	9.87773	-0.0967089	0.656098	-0.1474	0.882816	0.928291
CG31637	1715.26	-0.0433386	0.105598	-0.410411	0.681505	0.785976
CG31638	1607.64	-0.0431567	0.146811	-0.29396	0.768788	0.850269
CG31639	3.69785	-3.53607	2.62417	-1.3475	0.177818	0.30267
CG31643	138.458	0.295038	0.23786	1.24039	0.214833	0.347055
CG31644	5.14791	-0.10358	1.06925	-0.0968716	0.922828	0.95325
CG31648	111.949	0.0918059	0.211051	0.434993	0.663567	0.77301
CG3165	134.733	-0.0410104	0.213632	-0.191968	0.847767	0.904572
CG31659	7.84036	0.312318	0.799219	0.390779	0.695961	0.796852
CG31663	2489.2	0.170604	0.0940463	1.81405	0.0696704	0.146296
CG31675	6.64326	-1.35071	0.840396	-1.60723	0.108003	0.206399
CG31676	807.684	0.102408	0.130388	0.785411	0.432213	0.575868
CG3168	4888.16	-0.0632092	0.105481	-0.599246	0.549009	0.679339
CG31688	1142.57	-0.432848	0.229374	-1.88708	0.0591491	0.128679
CG31690	843.339	-0.122537	0.166884	-0.734264	0.462788	0.603955
CG31697	5.64489	-0.078363	0.87399	-0.0896612	0.928556	0.95696
CG31704	16.657	1.30071	0.615653	2.11273	0.0346242	0.0833288
CG31705	9747.58	-0.173928	0.135305	-1.28545	0.198634	0.328623
CG31706	5197.85	-0.0589443	0.154597	-0.381277	0.702997	0.80197
CG31709	3.25865	-1.41829	1.80446	-0.785994	0.431871	0.575557
CG31710	117.108	0.176537	0.264364	0.667778	0.504275	0.642216
CG31715	366.217	0.157894	0.190245	0.829952	0.406566	0.551027
CG31717	201.072	-0.041095	0.174299	-0.235773	0.813609	0.882845
CG31728	2.56846	-0.986985	1.28596	-0.767507	0.44278	0.586052
CG31731	1193.83	-0.0616744	0.12497	-0.493514	0.62165	0.73995
CG31739	1235.92	0.09954	0.121383	0.820047	0.412189	0.556024
CG31740	9.46056	-0.944006	1.71822	-0.549411	0.582723	0.707744
CG3176	16.0278	-0.825785	0.556992	-1.48258	0.138186	0.249524
CG31773	58.043	-1.17702	0.504008	-2.33533	0.0195264	0.0521179
CG31787	2.85138	-0.83066	1.29595	-0.640967	0.521544	0.656363
CG31788	8.2454	-3.70617	1.86644	-1.98569	0.0470676	0.107089
CG31793	591.24	0.0173333	0.113438	0.1528	0.878556	0.925608
CG31800	284.984	0.0480975	0.169339	0.284031	0.776386	0.856355
CG31802	7.78768	-1.37765	1.23029	-1.11978	0.262808	0.401468
CG31806	13.8551	-0.800602	0.586462	-1.36514	0.17221	0.295205
CG31812	61.9577	-0.0992252	0.285684	-0.347325	0.728347	0.821423
CG31815	13.6149	-2.15958	1.15725	-1.86613	0.0620239	0.13343
CG31817	108.484	-0.175252	0.260387	-0.673044	0.500919	0.638654
CG31820	3.74055	-1.39339	1.72944	-0.805691	0.420421	0.564288
CG3184	108.273	-0.400949	0.218944	-1.83129	0.0670571	0.141902
CG31849	205.606	-0.110909	0.171968	-0.644942	0.518965	0.654425
CG31855	338.761	-0.154178	0.142287	-1.08357	0.278556	0.419849
CG31861	24.2997	-1.06012	0.728991	-1.45423	0.145881	0.260585
CG31874	2.97015	1.95464	1.57848	1.23831	0.215602	0.34813
CG31875	11.9257	1.35091	0.705376	1.91516	0.0554721	0.122181
CG31886	161.591	0.432508	0.238015	1.81714	0.0691953	0.14547
CG31897	110.085	-0.0861403	0.230375	-0.373914	0.708468	0.806219
CG31898	35.9162	-0.635304	0.408246	-1.55618	0.119666	0.22353
CG31907	2.51206	-1.69726	1.92485	-0.881764	0.377905	0.522991
CG31908	416.873	0.337933	0.160048	2.11145	0.0347334	0.0834969
CG31909	8.59291	-1.68932	0.914663	-1.84693	0.0647569	0.137941
CG31915	189.337	-0.186085	0.172276	-1.08016	0.280072	0.421895
CG31918	40.1537	-0.438079	0.39682	-1.10398	0.269604	0.40934
CG3192	958.444	0.0343809	0.169339	0.203029	0.839112	0.89903
CG31922	63.5184	0.0716744	0.27939	0.256539	0.797535	0.872345
CG31948	4.08708	-1.56128	1.79956	-0.86759	0.385619	0.530969
CG31950	55.0954	0.452719	0.322505	1.40376	0.160391	0.279776
CG31957	55.8559	0.639809	0.320851	1.9941	0.0461415	0.10532
CG31961	397.466	-0.178488	0.125955	-1.41708	0.156459	0.274857
CG31974	1113.91	-0.0905448	0.128351	-0.705444	0.480534	0.620558
CG3198	2330.99	-0.191922	0.132238	-1.45134	0.146686	0.261671
CG31988	6.34901	1.70498	1.2981	1.31344	0.189034	0.316637
CG31999	882.758	0.0353847	0.179998	0.196584	0.844153	0.902793
CG32000	17119.1	-0.305909	0.152612	-2.00448	0.0450184	0.103245
CG32006	4.57339	2.26832	1.23282	1.83995	0.0657751	0.139658
CG32017	11915.1	-0.185299	0.165285	-1.12109	0.262249	0.400959
CG32022	162.883	0.371943	0.20059	1.85424	0.0637042	0.1363
CG32040	3.26925	-1.48312	1.17758	-1.25947	0.207862	0.33924
CG32066	707.718	0.129218	0.12145	1.06396	0.287347	0.429299
CG32069	62.5824	0.384946	0.303126	1.26992	0.204113	0.334769
CG32075	170.106	0.394136	0.186609	2.1121	0.0346778	0.0834198
CG32082	185.315	-0.465501	0.247351	-1.88194	0.0598438	0.129852
CG3209	712.959	0.135337	0.116745	1.15926	0.246351	0.383161
CG32091	245.607	-0.102533	0.283635	-0.361494	0.71773	0.814288
CG32095	149.016	-0.0535958	0.227549	-0.235535	0.813794	0.882845
CG32100	259.101	-0.233563	0.18178	-1.28487	0.198839	0.32886
CG32104	155.952	0.0716316	0.226848	0.315769	0.752178	0.83783
CG32109	306.843	0.206847	0.181155	1.14182	0.253528	0.390946
CG32110	8.13595	-1.86688	0.954986	-1.95487	0.0505979	0.113661
CG32112	817.957	-0.0407871	0.108965	-0.374315	0.70817	0.806124
CG32121	7.15305	-1.21526	0.894294	-1.3589	0.174177	0.297809
CG3213	3.41434	0.62392	2.13527	0.292197	0.770136	0.851317
CG32137	214.731	0.0139488	0.180538	0.0772625	0.938415	0.962702
CG3214	1131.94	-0.0684619	0.15612	-0.43852	0.66101	0.770876
CG32141	3.48567	-1.55093	1.79717	-0.862987	0.388145	0.533272
CG32147	153.195	0.412255	0.264434	1.55901	0.118994	0.222666
CG32150	3.1604	1.69798	1.32283	1.28359	0.199285	0.329289
CG32161	2.73798	-1.86116	1.90863	-0.97513	0.329496	0.47358
CG32165	80.7262	0.316661	0.252163	1.25578	0.209197	0.340478
CG32176	448.754	0.303866	0.166503	1.82499	0.0680026	0.143417
CG32187	165.71	0.482985	0.217491	2.22071	0.0263704	0.0666665
CG32192	3.5536	-0.498559	1.60892	-0.309873	0.756658	0.841585
CG32196	77.9984	0.307847	0.270652	1.13743	0.255359	0.392686
CG32202	97.6278	0.0495639	0.238316	0.207976	0.835248	0.896427
CG3222	3.29714	-0.30869	1.30485	-0.236572	0.812989	0.882524
CG32221	233.231	-0.00460564	0.165984	-0.0277475	0.977864	0.986323
CG3223	214.651	-0.0237897	0.194916	-0.122051	0.902858	0.940053
CG32230	2240.96	-0.32186	0.176287	-1.82577	0.0678845	0.143282
CG32236	3.34265	-1.82054	1.49907	-1.21445	0.224578	0.358535
CG32237	10.3457	-0.662054	0.674844	-0.981046	0.32657	0.470457
CG3224	270.357	0.273843	0.174441	1.56983	0.116454	0.218877
CG32243	380.876	-0.0746178	0.142779	-0.522611	0.601245	0.723411
CG3225	191.156	0.138334	0.187885	0.736268	0.461568	0.602807
CG32250	440.387	-0.0352583	0.13316	-0.264782	0.791178	0.867618
CG32260	4.20174	0.258121	1.13732	0.226955	0.820459	0.887188
CG32262	226.096	-0.350864	0.173268	-2.02498	0.0428698	0.0994602
CG32266	2.49295	-4.97592	2.62034	-1.89896	0.0575693	0.126095
CG32267	291.827	-0.338895	0.191766	-1.76724	0.0771886	0.158796
CG32280	176.07	0.203932	0.208818	0.976601	0.328767	0.473173
CG32281	102.491	0.0779393	0.234787	0.331958	0.739921	0.828696
CG32284	3.27454	0.698884	1.45476	0.480411	0.630935	0.747121
CG32295	6.82399	-1.86214	1.23339	-1.50978	0.131099	0.239373
CG32313	4.26641	-0.568555	1.04406	-0.544564	0.586053	0.710771
CG32350	820.617	-0.108532	0.191365	-0.567149	0.570613	0.696978
CG32354	433.338	0.1105	0.213264	0.518135	0.604364	0.725804
CG32365	56.9555	-0.662426	0.301024	-2.20057	0.0277663	0.0696015
CG32373	49.0097	-0.794828	0.362548	-2.19234	0.0283551	0.070675
CG3238	9.54704	1.27114	0.751778	1.69085	0.0908662	0.180155
CG32391	9.83867	-1.57432	0.843974	-1.86536	0.0621306	0.133606
CG32392	224.618	0.45308	0.239339	1.89305	0.0583514	0.127355
CG32396	6.37847	-3.32734	1.78268	-1.86648	0.0619738	0.13335
CG32407	396.007	0.380152	0.180005	2.11189	0.0346955	0.0834409
CG32425	1900.6	-0.2662	0.148931	-1.7874	0.0738722	0.1533
CG32428	464.789	-0.121893	0.149341	-0.816202	0.414385	0.558276
CG32436	17.0275	0.471115	0.616716	0.763909	0.444922	0.587788
CG32442	150.203	-0.199369	0.205633	-0.969537	0.332277	0.476527
CG32447	7.84336	1.71191	0.856534	1.99864	0.0456471	0.104354
CG32448	119.111	0.445328	0.232992	1.91135	0.0559601	0.123129
CG32452	134.106	0.108618	0.203836	0.532867	0.594126	0.717309
CG32454	16.2494	-0.896301	0.642705	-1.39458	0.163144	0.283368
CG32457	3.97312	-0.333584	1.15331	-0.289239	0.772398	0.852841
CG32459	4.57273	0.980192	0.993309	0.986794	0.323744	0.467463
CG32461	3.03074	-0.705983	1.21992	-0.578712	0.562783	0.690446
CG32473	796.225	0.248498	0.209339	1.18706	0.235204	0.370546
CG32479	1139.48	0.212145	0.204568	1.03704	0.299718	0.442025
CG32507	3.16565	-2.62039	1.61538	-1.62216	0.10477	0.201261
CG32512	209.298	-0.0275447	0.207761	-0.132579	0.894527	0.934831
CG32523	3.23135	-4.32511	2.27189	-1.90375	0.056943	0.125032
CG3253	302.855	-0.109535	0.13897	-0.788192	0.430585	0.574419
CG32533	252.021	0.151637	0.223466	0.678568	0.497412	0.636397
CG32536	20.8625	0.764833	0.545843	1.4012	0.161155	0.280819
CG32537	152.797	0.425805	0.291552	1.46048	0.144159	0.258329
CG32544	1093.24	-0.156319	0.115854	-1.34928	0.177248	0.301844
CG32547	738.857	-0.389708	0.207836	-1.87508	0.0607823	0.131452
CG32548	8.10473	-0.275156	0.891789	-0.308543	0.757669	0.842092
CG32554	22.7507	0.690854	0.466126	1.48212	0.138309	0.249622
CG3257	4240.16	-0.342611	0.148617	-2.30533	0.021148	0.0557042
CG32572	4.47351	1.06135	1.07555	0.9868	0.323741	0.467463
CG32576	142.507	-0.17487	0.26229	-0.666706	0.50496	0.642471
CG32579	43.9966	0.516632	0.365638	1.41296	0.157667	0.276203
CG32582	16.0695	0.810883	0.803371	1.00935	0.312807	0.45587
CG32590	141.283	-0.365287	0.21906	-1.66752	0.0954108	0.187278
CG32591	6.23247	-0.612314	0.904264	-0.677141	0.498316	0.636941
CG3262	1333.17	0.259666	0.142456	1.82278	0.0683368	0.143936
CG32625	8.09691	1.7221	1.11007	1.55134	0.12082	0.225052
CG32638	446.501	-0.278101	0.176625	-1.57453	0.115366	0.217311
CG32641	20.9492	0.456467	0.485304	0.94058	0.34692	0.491351
CG32645	21.6828	0.866055	0.662801	1.30666	0.191328	0.319444
CG32650	30.3892	-0.851602	0.442782	-1.9233	0.0544425	0.120413
CG32652	3.0114	1.87338	1.69282	1.10666	0.26844	0.408018
CG32668	9.11008	0.982367	0.734606	1.33727	0.181134	0.306823
CG32669	32.6745	-1.02993	0.589315	-1.74768	0.08052	0.164051
CG3267	130.915	0.285237	0.266015	1.07226	0.283605	0.425758
CG32694	99.2373	-0.528745	0.388093	-1.36242	0.173066	0.296481
CG32706	82.2479	-0.0159773	0.367697	-0.0434522	0.965341	0.978473
CG32708	134.143	0.213462	0.218838	0.975434	0.329345	0.47358
CG32726	34.6296	1.94027	2.82284	0.687345	0.491865	0.631004
CG32732	293.605	-0.0491656	0.230834	-0.212992	0.831334	0.893942
CG32756	323.361	0.246781	0.204592	1.20621	0.227737	0.362325
CG3277	204.262	-0.296709	0.163367	-1.81621	0.0693389	0.145715
CG32795	780.918	-0.0201044	0.145735	-0.137952	0.890278	0.932869
CG3280	78.9527	0.0345169	0.269413	0.128119	0.898055	0.937227
CG32803	91.4712	-0.0390203	0.243105	-0.160508	0.872481	0.921384
CG32808	60.95	0.417299	0.324452	1.28616	0.198386	0.328448
CG32809	9899.07	-0.343905	0.14927	-2.30392	0.0212273	0.0558258
CG3281	183.425	0.0151798	0.220041	0.0689862	0.945001	0.967413
CG32811	2.67246	-3.0092	2.00282	-1.50248	0.132973	0.241754
CG32812	7.40881	-1.0417	0.88469	-1.17747	0.239006	0.3747
CG32813	627.889	-0.224847	0.183876	-1.22281	0.2214	0.354901
CG32814	12.4239	-1.604	0.926494	-1.73125	0.0834066	0.168703
CG32815	1815.12	-0.269928	0.12225	-2.208	0.0272445	0.0685013
CG32816	20.7121	-1.01778	0.676361	-1.50479	0.132378	0.241127
CG32817	2.42706	-1.21882	1.63936	-0.743474	0.457195	0.599011
CG32832	2.85659	-3.14693	1.56205	-2.01462	0.043945	0.101352
CG32850	1438.96	-0.107018	0.16892	-0.633544	0.526378	0.659884
CG32855	10.6269	-1.11217	0.884797	-1.25698	0.208761	0.340082
CG32856	90.634	0.211918	0.25082	0.844898	0.398168	0.542204
CG3288	34.8944	-0.168912	0.509813	-0.331321	0.740402	0.828806
CG3294	100.302	0.502697	0.307775	1.63332	0.102401	0.197639
CG32971	3.57215	-1.03561	1.16924	-0.885708	0.375775	0.520784
CG32982	1228.94	-0.0878381	0.121558	-0.722604	0.469923	0.610307
CG32985	6.10924	-1.53939	0.99773	-1.54289	0.122857	0.228166
CG3303	107.577	0.113498	0.27562	0.411792	0.680492	0.785319
CG33052	171.093	-0.440629	0.268069	-1.64372	0.100234	0.19434
CG33054	116.767	-0.530349	0.241611	-2.19505	0.0281598	0.0703154
CG3306	3.11182	-1.68267	1.83175	-0.918615	0.358297	0.503331
CG33082	23.7965	0.586701	0.458083	1.28077	0.200273	0.330511
CG3309	232.605	-0.189247	0.165263	-1.14513	0.252156	0.389453
CG33093	3.22866	-2.68192	1.42205	-1.88596	0.0593007	0.12893
CG33096	17.527	-0.0352345	0.521859	-0.0675173	0.94617	0.96832
CG33098	14.2203	-0.79707	0.576179	-1.38337	0.16655	0.287779
CG33099	2.59559	-0.0183054	1.277	-0.0143348	0.988563	0.992824
CG33108	104.35	0.00628821	0.272688	0.0230601	0.981602	0.988769
CG33111	190.938	-0.197359	0.179401	-1.1001	0.271288	0.411582
CG33116	699.671	0.047356	0.125095	0.37856	0.705015	0.803667
CG33123	536.501	0.20978	0.142777	1.46929	0.141755	0.254584
CG33127	3.73007	-2.9096	1.73076	-1.68111	0.0927407	0.183018
CG3313	141.875	0.0680356	0.226378	0.300539	0.763766	0.846213
CG33137	8.48143	1.32432	0.762378	1.73709	0.0823712	0.167118
CG33143	1487.97	0.0015263	0.126539	0.0120619	0.990376	0.993744
CG33155	30.8178	0.0558607	0.402702	0.138715	0.889675	0.932789
CG33156	446.998	-0.150759	0.148981	-1.01194	0.311568	0.45463
CG33158	179.539	-0.0312907	0.173052	-0.180816	0.856512	0.910407
CG33170	792.409	-0.390934	0.195504	-1.99962	0.0455409	0.104173
CG33172	69.5959	0.217137	0.328515	0.660964	0.508635	0.645779
CG33178	24.0943	0.0632572	0.637569	0.0992163	0.920967	0.952139
CG33181	2775.08	-0.102904	0.0973617	-1.05693	0.290546	0.432642
CG33189	15.9969	0.00664795	0.674219	0.00986021	0.992133	0.994774
CG33191	7.57212	0.459467	0.881854	0.521023	0.60235	0.724252
CG3321	1782.44	-0.0500822	0.129649	-0.386289	0.699282	0.79939
CG33213	67.6488	0.343127	0.315822	1.08646	0.277277	0.418397
CG33217	308.379	0.416112	0.222345	1.87147	0.06128	0.132178
CG33225	2.42619	-0.475309	1.56422	-0.303864	0.761231	0.844461
CG33228	103.958	-0.545559	0.257728	-2.1168	0.0342767	0.082736
CG3323	3.52424	2.29933	1.37438	1.67299	0.0943286	0.185652
CG33230	110.137	0.363305	0.226594	1.60333	0.108861	0.207618
CG33233	3.00752	-1.27345	1.37522	-0.926003	0.354444	0.499902
CG33253	2.70399	1.92892	1.47651	1.3064	0.191415	0.319516
CG3326	4.12663	1.14915	1.0737	1.07027	0.284499	0.426689
CG33260	30.1364	-0.0422198	0.527554	-0.0800292	0.936214	0.961466
CG33267	91.5448	0.0705111	0.29046	0.242757	0.808194	0.879386
CG33275	499.697	-0.334029	0.183668	-1.81866	0.0689631	0.145154
CG33276	63.122	0.100853	0.295003	0.341871	0.732448	0.823801
CG33278	7.3684	0.437124	0.856657	0.510267	0.609864	0.73097
CG33288	4.29416	0.965689	1.06146	0.909774	0.362942	0.507774
CG33293	8.23023	-0.358513	0.909676	-0.39411	0.6935	0.795148
CG3330	2.60666	-0.610575	2.01319	-0.303287	0.761671	0.844685
CG33310	80.2338	-0.488385	0.460305	-1.061	0.288689	0.43075
CG3332	14.656	-0.703372	3.73804	-0.188166	0.850746	0.906467
CG33331	104.85	-0.140178	0.252135	-0.555962	0.578237	0.704024
CG33332	41.035	0.486989	0.417013	1.1678	0.242886	0.37904
CG33340	9.47845	-0.750625	1.51909	-0.494126	0.621217	0.739736
CG3335	230.336	0.406236	0.190828	2.12881	0.03327	0.0808203
CG3338	517.538	0.0949755	0.128752	0.73766	0.460721	0.602145
CG3339	32.6473	-0.20732	0.416493	-0.497776	0.618642	0.737497
CG3342	134.31	0.221922	0.258008	0.860136	0.389714	0.534599
CG3345	102.526	-0.692896	0.334525	-2.07129	0.0383321	0.0902088
CG33458	6.5004	-0.453371	0.83204	-0.544891	0.585829	0.71058
CG33463	4.23195	-2.27314	1.79562	-1.26593	0.205537	0.336429
CG33465	2.73771	0.735071	1.69336	0.434091	0.664223	0.773343
CG33468	3.38349	0.0940794	1.43909	0.0653742	0.947876	0.968774
CG33475	4.99842	-1.94462	1.46833	-1.32438	0.185378	0.311988
CG33477	3.43752	-4.39264	2.01778	-2.17697	0.0294832	0.0729389
CG3348	14.0687	-0.649876	0.789635	-0.823008	0.410504	0.554968
CG33506	166.351	0.240042	0.19718	1.21737	0.223462	0.357399
CG33509	3.25656	1.06901	1.40148	0.762776	0.445597	0.588241
CG33514	6.81905	-0.559046	0.828749	-0.674567	0.499951	0.638262
CG33521	104.23	-0.541249	0.312357	-1.73279	0.0831331	0.168374
CG3356	1155.98	-0.156445	0.124503	-1.25655	0.208917	0.340178
CG3358	186.654	-0.258299	0.228657	-1.12963	0.258632	0.396743
CG33632	23.1949	-0.822198	0.44703	-1.83924	0.0658793	0.139781
CG33635	111.653	-0.228927	0.248059	-0.92287	0.356075	0.501403
CG33655	3.01263	-0.630704	1.50105	-0.420175	0.674358	0.780955
CG3368	502.367	0.0280989	0.122021	0.23028	0.817874	0.885528
CG33695	140.179	0.150141	0.204083	0.735685	0.461922	0.603048
CG33696	748.818	-0.288768	0.14156	-2.0399	0.0413607	0.096481
CG33700	3.66361	1.86631	1.32552	1.40799	0.159134	0.278407
CG33766	8.57316	1.27797	0.757225	1.6877	0.0914682	0.181045
CG33767	5.63852	2.37723	1.14815	2.07049	0.0384067	0.0903241
CG33768	2.72067	2.57823	1.55401	1.65908	0.0970995	0.189842
CG33769	2.88876	2.02513	1.35314	1.49662	0.134493	0.24392
CG33777	19.8686	-1.18689	0.512265	-2.31695	0.0205066	0.0543109
CG3386	214.486	0.336694	0.177864	1.89298	0.0583605	0.127355
CG33914	56.2433	-0.0116411	0.308917	-0.0376836	0.96994	0.981516
CG3394	155.294	0.0373021	0.352621	0.105785	0.915753	0.948245
CG33958	151.756	0.254692	0.237621	1.07184	0.283792	0.425868
CG33970	243.576	-0.205392	0.324311	-0.633318	0.526526	0.659897
CG33978	250.029	0.0391718	0.246089	0.159178	0.873529	0.922049
CG33993	61.5932	-0.431117	0.281983	-1.52887	0.126296	0.232721
CG33998	23.5489	-0.835427	0.760715	-1.09821	0.272111	0.412359
CG34001	14.6641	0.574649	0.731078	0.786029	0.431851	0.575557
CG34008	3.07436	-0.222125	1.21307	-0.183109	0.854712	0.909416
CG34015	78.5376	-0.0316284	0.286594	-0.110359	0.912124	0.946082
CG3402	190.423	0.235191	0.176911	1.32943	0.183706	0.309763
CG34025	5.84683	0.501683	0.883106	0.568089	0.569975	0.696279
CG34027	8.48573	-0.944967	0.738018	-1.28041	0.2004	0.330618
CG34039	122.868	0.285596	0.223659	1.27692	0.201629	0.33188
CG34041	8.51173	0.115767	0.766995	0.150936	0.880026	0.926421
CG34045	12.2616	-0.214299	0.648525	-0.330441	0.741067	0.829217
CG34056	35.2665	0.0839338	0.365445	0.229676	0.818344	0.885622
CG3407	120.735	0.26695	0.210403	1.26875	0.204529	0.335243
CG3408	63.8259	0.229676	0.305877	0.750877	0.452727	0.595136
[truncated: 4,679 more rows]

## Sheet: Atx2_TRIBE_targets_Up
id	baseMean	log2FoldChange	lfcSE	stat	pvalue	padj
Akh	837.282	1.35043	0.566672	2.38308	0.0171682	0.0469442
Arp8	106.708	0.80401	0.257229	3.12566	0.00177405	0.00701368
CG11168	199.321	0.56755	0.165847	3.42214	0.00062131	0.00282784
CG12279	151.503	0.408749	0.201053	2.03305	0.0420477	0.0979037
CG15743	232.678	0.368551	0.183426	2.00926	0.0445097	0.102387
CG1707	180.591	0.865706	0.188308	4.59727	4.28055e-06	3.46852e-05
CG31368	545.113	0.28617	0.137729	2.07777	0.0377309	0.0891097
CG42675	79.5066	1.49823	0.328888	4.55544	5.2277e-06	4.16921e-05
CG8401	364.835	0.654392	0.186344	3.51175	0.000445165	0.00211619
CG8675	134.527	0.650424	0.268855	2.41924	0.0155532	0.0434557
CG8814	600.6	0.290629	0.117352	2.47655	0.0132658	0.038077
CR44832	1665.85	0.745782	0.21459	3.47539	0.000510115	0.00238615
Capa	1024.53	0.570911	0.175646	3.25036	0.0011526	0.00480914
Cyp1	7504.83	0.553003	0.115714	4.77904	1.76138e-06	1.54766e-05
Dh31	2664.2	0.422325	0.156249	2.70291	0.0068736	0.022194
Kap-alpha1	1340.5	0.453794	0.110806	4.09541	4.2142e-05	0.000269035
Mip	1373.57	1.01096	0.138484	7.30023	2.87282e-13	8.27047e-12
NPF	836.299	0.589789	0.199974	2.94932	0.0031847	0.0116138
RpL19	6128.21	0.760707	0.132469	5.74253	9.3273e-09	1.34078e-07
RpS10b	5338.33	1.28749	0.152228	8.4576	2.72945e-17	1.3486e-15
Trissin	627.34	0.886477	0.151616	5.84686	5.00939e-09	7.60211e-08
janA	164.417	1.26202	0.20109	6.27588	3.47654e-10	6.51345e-09

## Sheet: Atx2_TRIBE_targets_down
id	baseMean	log2FoldChange	lfcSE	stat	pvalue	padj
14-3-3epsilon	16167.9	-0.365609	0.108611	-3.36622	0.000762053	0.00336323
Ace	16364.1	-0.719785	0.157676	-4.56495	4.99608e-06	3.99348e-05
Ank2	20805.2	-0.537599	0.21691	-2.47844	0.0131957	0.0379475
B4	4372.9	-0.676692	0.149047	-4.54013	5.62186e-06	4.43692e-05
Bruce	6520.92	-0.604374	0.25484	-2.37158	0.0177123	0.0480976
Bsg	13738.2	-0.466509	0.115802	-4.0285	5.61349e-05	0.000345493
CG10866	302.807	-0.695718	0.174534	-3.98614	6.71568e-05	0.000406963
CG11000	7611.62	-0.709881	0.155901	-4.55342	5.27816e-06	4.20629e-05
CG11638	1878.88	-0.469969	0.138009	-3.40535	0.000660792	0.00297441
CG12290	972.696	-0.355791	0.12097	-2.94116	0.0032699	0.0118878
CG12502	2586.62	-0.620798	0.123849	-5.01255	5.37121e-07	5.2979e-06
CG12541	623.435	-0.971261	0.123684	-7.85278	4.06926e-15	1.47033e-13
CG12605	8466.01	-0.606312	0.137507	-4.4093	1.03705e-05	7.61868e-05
CG13650	2519.59	-0.67962	0.107237	-6.33753	2.33473e-10	4.51764e-09
CG13933	1067.19	-0.270764	0.124796	-2.16965	0.0300337	0.0741626
CG14186	4539.28	-0.735365	0.192535	-3.81938	0.000133788	0.000742547
CG14509	9707.03	-0.650434	0.070917	-9.17177	4.65313e-20	3.18905e-18
CG15894	2896.95	-0.464536	0.153452	-3.02725	0.00246789	0.00932968
CG17360	4225.55	-0.626994	0.138122	-4.53942	5.6408e-06	4.44857e-05
CG17684	1412.82	-1.2772	0.213235	-5.98965	2.10295e-09	3.41585e-08
CG18467	748.781	-0.83913	0.120529	-6.96205	3.35368e-12	8.46226e-11
CG18812	6463.84	-0.93489	0.121857	-7.67202	1.69309e-14	5.67373e-13
CG30158	2539.89	-0.602416	0.0937957	-6.42264	1.3393e-10	2.65932e-09
CG3078	2269.3	-0.205826	0.10232	-2.01159	0.0442627	0.101908
CG31064	2299.32	-0.356635	0.137546	-2.59283	0.00951886	0.0289739
CG31191	1620.32	-0.494773	0.141708	-3.49149	0.000480332	0.0022668
CG31221	38216.1	-0.346855	0.129065	-2.68744	0.00720015	0.0230661
CG32486	6315.5	-0.69219	0.103899	-6.66218	2.69798e-11	6.08505e-10
CG32506	2262.21	-0.261284	0.109093	-2.39506	0.0166175	0.0458156
CG34114	4315	-0.660007	0.151314	-4.36182	1.28983e-05	9.28307e-05
CG34362	10338.4	-0.849283	0.106599	-7.96711	1.62428e-15	6.16242e-14
CG34394	3699.67	-0.568267	0.126065	-4.50773	6.55241e-06	5.08446e-05
CG3530	4139.72	-0.319175	0.0945772	-3.37475	0.000738828	0.00327706
CG3632	1669.77	-0.337401	0.119516	-2.82307	0.00475668	0.0162268
CG42339	993.356	-0.431288	0.105927	-4.07155	4.67006e-05	0.000295122
CG42404	2165.69	-0.746857	0.140347	-5.32149	1.0292e-07	1.1962e-06
CG42699	908.512	-0.378809	0.153761	-2.46363	0.013754	0.0392343
CG42732	5528.55	-0.311739	0.151798	-2.05364	0.0400109	0.0937685
CG42797	1501.15	-0.443999	0.141321	-3.14177	0.00167932	0.00667145
CG43737	6616.71	-0.725128	0.157218	-4.61224	3.98356e-06	3.25518e-05
CG43901	4900.93	-0.686691	0.193546	-3.54795	0.000388244	0.00188239
CG44247	7384.88	-0.297026	0.104167	-2.85145	0.00435207	0.0150691
CG5466	1294.95	-0.424383	0.109362	-3.88052	0.000104233	0.000593711
CG6123	3085.88	-0.485824	0.168736	-2.8792	0.00398686	0.014039
CG6330	3607.52	-0.814963	0.13052	-6.24398	4.2658e-10	7.89469e-09
CG6498	3942.61	-0.440081	0.144646	-3.04247	0.00234642	0.00892767
CG6966	2423.85	-0.506811	0.167094	-3.03309	0.00242066	0.00917071
CG7708	6609.27	-1.04696	0.119519	-8.75981	1.95575e-18	1.07647e-16
CG8177	10565.2	-1.05741	0.115575	-9.14915	5.73827e-20	3.85808e-18
CG8602	1812.02	-0.259591	0.0992456	-2.61565	0.00890588	0.0273431
CG8613	2936.59	-1.11846	0.081301	-13.757	4.62495e-43	2.72949e-40
CG8641	1208.86	-1.1072	0.113201	-9.78083	1.36089e-22	1.31425e-20
CG9674	22123.5	-0.656572	0.13185	-4.97969	6.36878e-07	6.20694e-06
CG9919	1442.99	-0.296935	0.0992911	-2.99055	0.0027848	0.0103364
Camta	4002.96	-0.846075	0.190825	-4.43378	9.2596e-06	6.92709e-05
CanB	3183.41	-0.457381	0.0896758	-5.10038	3.38966e-07	3.47907e-06
Cbp53E	13418.5	-1.39693	0.101595	-13.7499	5.10061e-43	2.85178e-40
Ccn	1326.37	-0.452477	0.120042	-3.76933	0.000163688	0.000881775
Cha	4714.14	-0.877109	0.138425	-6.33637	2.35245e-10	4.54013e-09
DOR	4304.08	-0.611583	0.134795	-4.53714	5.70228e-06	4.49038e-05
Dap160	6101.41	-0.569213	0.120916	-4.70752	2.50746e-06	2.13607e-05
Dop1R2	1190.21	-0.600012	0.148384	-4.04363	5.26296e-05	0.000326377
Drep-3	618.34	-0.815694	0.131093	-6.22223	4.90133e-10	8.93085e-09
Eph	5740.51	-0.615255	0.162207	-3.79303	0.00014882	0.000813229
Ggamma30A	48673.9	-1.06551	0.131442	-8.10633	5.21734e-16	2.11541e-14
Grip163	861.001	-0.333428	0.133069	-2.50567	0.0122219	0.0355125
His3.3B	19229.9	-0.238245	0.0735095	-3.24101	0.00119106	0.00495987
Hs6st	882.405	-0.503537	0.107053	-4.70363	2.55574e-06	2.17272e-05
Kul	1908.85	-0.687048	0.163421	-4.20417	2.62042e-05	0.000175294
Lgr1	283.828	-0.54659	0.213829	-2.5562	0.0105823	0.0316218
Lin29	2913.73	-0.510999	0.186158	-2.74498	0.00605143	0.0199146
Lnk	1347.27	-0.411806	0.119471	-3.44691	0.000567046	0.00262282
Lpin	4641.75	-0.469645	0.179264	-2.61985	0.00879688	0.0270789
MKP-4	481.043	-0.302283	0.130293	-2.32003	0.0203394	0.0539086
Mkp3	3189.37	-0.827894	0.12154	-6.81172	9.64399e-12	2.31783e-10
Mp	3488.6	-0.589433	0.122433	-4.81435	1.4768e-06	1.32388e-05
Nedd4	2465.36	-0.378198	0.0990546	-3.81808	0.000134495	0.000745688
Nmdar2	3253.05	-1.05868	0.17777	-5.95534	2.59531e-09	4.13964e-08
Nplp1	4094.97	-0.412319	0.0735661	-5.60474	2.08564e-08	2.8188e-07
Octbeta1R	3282.67	-0.680722	0.117709	-5.78309	7.33411e-09	1.07462e-07
Octbeta3R	1498.54	-0.604126	0.155669	-3.88084	0.000104094	0.000593237
Pdp1	19104.9	-0.277233	0.130016	-2.13229	0.0329828	0.0801409
Pkc53E	6746.38	-0.660749	0.092449	-7.14717	8.85863e-13	2.43166e-11
Pp1alpha-96A	3372.06	-0.531871	0.0929614	-5.72142	1.0564e-08	1.50835e-07
Pp2B-14D	2842.04	-0.513109	0.11817	-4.34212	1.41115e-05	0.000100071
Ptp99A	6278.83	-0.589129	0.136524	-4.31519	1.59466e-05	0.000111448
Rab27	402.861	-0.508773	0.228847	-2.2232	0.0262023	0.0662889
Rbp9	11536	-0.386843	0.16988	-2.27715	0.022777	0.0591589
RhoGAPp190	8947.75	-0.562928	0.126328	-4.45609	8.34689e-06	6.30319e-05
Rph	982.195	-0.357196	0.116571	-3.06421	0.00218248	0.00840628
SRPK	3148.53	-0.504317	0.142878	-3.52972	0.000416007	0.00199605
SerT	562.653	-0.931011	0.130697	-7.12342	1.05284e-12	2.86043e-11
Shawl	1711.1	-0.58763	0.122693	-4.78944	1.67249e-06	1.47811e-05
Smox	4192.19	-0.347895	0.12179	-2.85651	0.00428326	0.0148957
Src42A	2379.77	-0.234843	0.0885005	-2.65357	0.00796441	0.0250147
Taf6	400.461	-0.379089	0.173812	-2.18103	0.029181	0.0723261
Tbh	1690.09	-0.546931	0.127475	-4.2905	1.7827e-05	0.000123372
Tdc2	327.363	-0.420601	0.212128	-1.98277	0.0473929	0.107691
Ten-a	15509.2	-0.772231	0.160643	-4.80713	1.53115e-06	1.36914e-05
Tob	8398.68	-0.727996	0.131124	-5.55199	2.82439e-08	3.7133e-07
Ubc-E2H	3794.66	-0.8533	0.0890453	-9.58276	9.44828e-22	8.29497e-20
Unc-76	7211.09	-0.843686	0.0863439	-9.77123	1.49622e-22	1.43193e-20
Vmat	16348.2	-1.12175	0.178715	-6.27676	3.45693e-10	6.48816e-09
beat-IIIc	1645.4	-0.564276	0.0863126	-6.53758	6.25204e-11	1.33902e-09
beat-VI	2182.91	-0.764467	0.0973594	-7.852	4.09442e-15	1.47441e-13
beat-Vc	511.699	-0.695966	0.126864	-5.48594	4.11284e-08	5.19509e-07
bol	13163	-0.602177	0.150452	-4.00246	6.2688e-05	0.000383161
brat	4911.94	-0.551396	0.214797	-2.56706	0.0102565	0.0308829
btsz	2976.49	-0.526516	0.136803	-3.84872	0.000118739	0.000668448
chrb	12831.9	-0.50565	0.0860289	-5.87768	4.16068e-09	6.38712e-08
dbo	1872.37	-0.498929	0.0873591	-5.71124	1.12158e-08	1.5886e-07
dnc	10913.9	-0.518697	0.0899432	-5.76694	8.07261e-09	1.17796e-07
dpr19	1916.57	-0.58586	0.108764	-5.38654	7.1825e-08	8.66057e-07
fru	3315.71	-1.14969	0.232484	-4.94526	7.60419e-07	7.206e-06
fry	3189.71	-0.619064	0.194246	-3.187	0.00143756	0.00582869
glec	1622.55	-0.434198	0.113747	-3.81721	0.000134967	0.000747188
gprs	3526.08	-0.729931	0.1342	-5.43912	5.35452e-08	6.59874e-07
heph	14880.9	-0.512683	0.158062	-3.24356	0.00118047	0.00491964
hipk	7660.86	-0.973475	0.242468	-4.01486	5.94809e-05	0.000364818
igl	10940.7	-0.903332	0.0827117	-10.9215	9.10241e-28	1.51086e-25
lola	12703.3	-0.340174	0.104672	-3.2499	0.00115447	0.00481507
mam	2294.12	-0.653241	0.167703	-3.89523	9.81045e-05	0.000563028
mbl	7925.81	-0.929839	0.196573	-4.73025	2.24246e-06	1.92576e-05
mei-P26	35523	-0.540235	0.11695	-4.61938	3.84896e-06	3.15247e-05
msps	5826.48	-0.526093	0.15578	-3.37714	0.000732434	0.00325006
nrv3	69756.2	-0.98422	0.103362	-9.52211	1.6969e-21	1.39034e-19
prt	616.166	-0.825844	0.145284	-5.68434	1.31318e-08	1.83551e-07
roq	1616	-0.706021	0.136154	-5.18547	2.15473e-07	2.3333e-06
sbb	5669.27	-0.534788	0.135728	-3.94014	8.14332e-05	0.000480859
sdt	4689.9	-0.332586	0.1114	-2.98551	0.00283109	0.0104753
svr	8958.17	-0.314352	0.120695	-2.60451	0.00920051	0.0281479
vig	5970.88	-0.214555	0.0890493	-2.4094	0.0159788	0.0444003

## Sheet: Atx2_TRIBE_targets_unchanged
id	baseMean	log2FoldChange	lfcSE	stat	pvalue	padj
Ald	17389.6	-0.189314	0.112554	-1.68198	0.0925732	0.182721
AstA	1227.01	0.0405076	0.156204	0.259325	0.795384	0.870799
Bub3	274.935	0.0767557	0.168363	0.455895	0.648465	0.761513
CCAP	98.9771	0.51598	0.309152	1.66902	0.0951137	0.186833
CG10254	1590.73	-0.10475	0.126776	-0.826263	0.408655	0.553082
CG10555	857.443	-0.0986929	0.124377	-0.793501	0.427486	0.571525
CG11306	1051.75	0.0668328	0.0971083	0.688229	0.491308	0.630469
CG11593	765.219	-0.193597	0.117154	-1.6525	0.0984324	0.191827
CG11768	2.97659	0.225156	1.21556	0.185228	0.85305	0.908102
CG11771	743.229	0.057338	0.141622	0.404866	0.685576	0.789313
CG12006	405.209	-0.0197569	0.156275	-0.126424	0.899397	0.937742
CG12162	594.752	0.0652322	0.167342	0.389814	0.696674	0.797323
CG12333	475.466	0.0720041	0.230243	0.312732	0.754485	0.839783
CG14613	352.201	0.216871	0.159575	1.35905	0.174131	0.297777
CG1637	2254.84	0.0135178	0.118663	0.113918	0.909303	0.944789
CG16989	457.764	0.2374	0.144406	1.64398	0.100181	0.19434
CG17168	480.981	0.278963	0.198007	1.40886	0.158878	0.278049
CG17180	175.573	0.0227832	0.246494	0.0924293	0.926357	0.955609
CG17841	3953.35	0.137382	0.0886344	1.54999	0.121144	0.225458
CG18336	60.8577	0.427801	0.339134	1.26145	0.207146	0.338132
CG2469	2908.73	0.243897	0.173898	1.40253	0.160756	0.280367
CG30424	207.003	-0.0819612	0.192051	-0.426767	0.669549	0.777241
CG32112	817.957	-0.0407871	0.108965	-0.374315	0.70817	0.806124
CG32243	380.876	-0.0746178	0.142779	-0.522611	0.601245	0.723411
CG32544	1093.24	-0.156319	0.115854	-1.34928	0.177248	0.301844
CG3446	1582.43	-0.211491	0.113609	-1.86157	0.0626636	0.134616
CG3744	1670.32	-0.180989	0.119232	-1.51796	0.129023	0.23668
CG40498	4146.29	0.114729	0.133027	0.862445	0.388443	0.53351
CG4281	441.323	0.0609226	0.141496	0.430561	0.666787	0.775315
CG4577	17732.5	-0.15485	0.101175	-1.53052	0.125888	0.23213
CG5026	431.651	-0.0355729	0.156714	-0.226993	0.820429	0.887188
CG5537	385.924	0.0290177	0.135115	0.214763	0.829952	0.893409
CG5961	224.549	-0.106555	0.166795	-0.638837	0.522929	0.657403
CG6083	254.584	0.0863844	0.151517	0.57013	0.56859	0.695119
CG6191	205.741	-0.236879	0.191397	-1.23763	0.215852	0.348404
CG6236	768.808	0.0799814	0.108983	0.733886	0.463018	0.604043
CG6707	2348.15	0.0555503	0.0855257	0.649516	0.516005	0.652019
CG6867	949.563	-0.0650979	0.111072	-0.586087	0.557817	0.686241
CG6961	131.912	0.0678213	0.19819	0.342204	0.732197	0.823801
CG7564	1785.78	-0.163954	0.15034	-1.09055	0.275469	0.41626
CG8202	371.445	0.114012	0.151449	0.752805	0.451567	0.593688
CG8818	1198.1	-0.14985	0.156861	-0.955305	0.339423	0.48387
CG9170	4350.12	-0.31525	0.167716	-1.87966	0.0601539	0.130385
CG9603	2545.08	-0.0238926	0.145737	-0.163943	0.869776	0.919458
CTPsyn	923.56	-0.0869871	0.111054	-0.78329	0.433457	0.576875
Clamp	1156.59	-0.13058	0.0960691	-1.35923	0.174074	0.297728
CycJ	116.201	0.0938047	0.249346	0.376204	0.706766	0.805387
D1	2070.81	0.352512	0.203758	1.73005	0.0836216	0.169009
DAT	899.619	-0.206003	0.146346	-1.40765	0.159235	0.278445
Den1	481.555	-0.140937	0.14011	-1.0059	0.314462	0.457129
Dscam4	4616.46	-0.262115	0.16289	-1.60916	0.107582	0.20577
FMRFa	373.648	0.417991	0.248478	1.6822	0.0925299	0.182704
GPHR	425.789	-0.185589	0.133314	-1.39212	0.163887	0.284287
Hop	912.764	0.333577	0.187307	1.78091	0.0749265	0.154883
Hrb98DE	4215	0.147641	0.146477	1.00795	0.31348	0.45638
IA-2	149943	-0.0959481	0.110226	-0.870467	0.384045	0.529146
ITP	3319.5	-0.26418	0.148652	-1.77717	0.0755397	0.155878
Iap2	1994.04	-0.191122	0.111226	-1.71832	0.0857379	0.172238
Kap-alpha3	2701.2	-0.202669	0.103594	-1.95638	0.0504202	0.113333
Miro	1071.86	-0.195227	0.111969	-1.74358	0.0812325	0.165218
Ms	4489.65	0.251414	0.163974	1.53325	0.125214	0.23129
Nap1	2119.12	0.115383	0.114586	1.00695	0.313959	0.456886
PTP-ER	2372.63	-0.0649752	0.117525	-0.552863	0.580357	0.70557
Pal2	7238.69	-0.0970645	0.0818039	-1.18655	0.235405	0.370695
Pallidin	122.806	-0.100417	0.216751	-0.463281	0.643163	0.757044
RAF2	469.779	0.0616605	0.175965	0.350413	0.726029	0.819792
Reps	1083.94	-0.0916026	0.121608	-0.753261	0.451293	0.593401
Snx3	1153.25	0.257687	0.146726	1.75625	0.0790465	0.161576
Su(var)3-7	635.073	-0.0200788	0.156542	-0.128265	0.89794	0.937199
Taf12	645.84	0.12616	0.128372	0.982765	0.325723	0.469492
Taspase1	124.109	-0.0748765	0.23743	-0.315362	0.752487	0.838086
Traf6	438.123	-0.157315	0.125536	-1.25314	0.210154	0.341564
Trh	625.745	-0.250554	0.148694	-1.68503	0.091982	0.181892
Trs23	173.785	0.300357	0.186586	1.60975	0.107452	0.205558
Ucp4A	761.32	-0.0304195	0.115805	-0.262678	0.792799	0.868775
Unr	17395.5	-0.0700568	0.11171	-0.627133	0.530572	0.66314
ben	2899.24	-0.104671	0.0835135	-1.25335	0.210079	0.341547
betaCOP	1072.56	0.28982	0.172564	1.6795	0.0930553	0.183502
bru-2	202.092	-0.0951257	0.195032	-0.487743	0.625732	0.74303
fne	27190	-0.109897	0.120555	-0.911595	0.361982	0.507043
mbf1	1532.18	0.0399464	0.108533	0.368059	0.712829	0.809881
mtm	516.569	0.0397854	0.165736	0.240053	0.810289	0.880898
natalisin	548.659	0.306107	0.18562	1.64911	0.0991249	0.192928
nbs	446.301	0.103692	0.146277	0.708873	0.478403	0.618847
phyl	1118.76	-0.215207	0.1568	-1.3725	0.169909	0.292205
pn	281.908	0.0929502	0.155557	0.59753	0.550153	0.6802
sNPF	5976.86	-0.0328269	0.129944	-0.252624	0.800559	0.874077
sick	2516.73	-0.256667	0.147055	-1.74538	0.080918	0.164736
slv	105.093	-0.448874	0.24397	-1.83988	0.0657864	0.139658
sty	2213.11	-0.0820055	0.138045	-0.594048	0.55248	0.682151
syd	3104.2	-0.235997	0.125925	-1.87411	0.060916	0.13166
tub	582.687	0.132392	0.122659	1.07934	0.280434	0.422284
tud	7023.67	0.193493	0.201472	0.960397	0.336856	0.481099
wls	597.488	-0.116516	0.120118	-0.97001	0.332041	0.476401
