# Supplementary material for: Antagonistic roles for Ataxin-2 structured and disordered domains in RNP condensation
Source: eLife. 2021 Mar 10;10:e60326. doi: 10.7554/eLife.60326 (PMC7946432; doi:10.7554/eLife.60326)
Supplement: Figure 3—source data 2. — Correlation of AREScore and target mRNA levels. [file elife-60326-fig3-data2.xlsx]

## Sheet: downregulated
gene_id	GAL4_1	GAL4_2	GAL4_3	RNAi_1	RNAi_2	RNAi_3	log2FoldChange	pvalue	AREScore
14-3-3epsilon	14.2141	14.0514	14.1056	13.6985	13.8261	13.905	-0.365609	0.000762053	12.45
Ace	14.3712	14.1449	14.2576	13.3682	13.7409	13.7867	-0.719785	4.99608e-06	19.5
Ank2	14.741	14.2823	14.5755	13.6639	14.2962	14.2106	-0.537599	0.0131957	7.8
B4	12.344	12.2187	12.4495	11.564	11.9464	11.7666	-0.676692	5.62186e-06	24.9
beat-IIIc	10.9175	10.8613	10.8911	10.4199	10.4455	10.4094	-0.564276	6.25204e-11	14.3
beat-Vc	9.16695	9.24703	9.25139	8.63087	8.68529	8.77352	-0.695966	4.11284e-08	5.4
beat-VI	11.2861	11.3523	11.4407	10.6897	10.7316	10.7545	-0.764467	4.09442e-15	10.4
bol	14.1321	13.7002	13.859	13.296	13.4356	13.4479	-0.602177	6.2688e-05	28.6
brat	12.7853	12.1714	12.3625	11.7182	12.1498	12.0875	-0.551396	0.0102565	59.3
Bruce	13.1967	12.6367	12.771	11.8569	12.6198	12.5263	-0.604374	0.0177123	3.9
Bsg	14.0673	13.7958	13.9014	13.4834	13.5005	13.5959	-0.466509	5.61349e-05	22
btsz	11.8228	11.6184	11.7589	11.1143	11.4244	11.3239	-0.526516	0.000118739	11.8
Camta	12.4395	12.0876	12.2337	11.2047	11.6982	11.6795	-0.846075	9.2596e-06	7.5
CanB	11.7473	11.819	11.8633	11.4728	11.3904	11.415	-0.457381	3.38966e-07	1.3
Cbp53E	14.021	14.2021	14.2157	12.9336	12.9279	13.0044	-1.39693	5.10061e-43	6.5
Ccn	10.4055	10.5438	10.6579	10.1367	10.1764	10.2007	-0.452477	0.000163688	2
CG10866	8.51003	8.36765	8.45484	7.97985	7.80071	8.08287	-0.695718	6.71568e-05	2.6
CG11000	13.2574	12.9718	13.2104	12.3129	12.6437	12.6584	-0.709881	5.27816e-06	10.4
CG11638	10.837	11.098	11.1889	10.6346	10.7009	10.6513	-0.469969	0.000660792	5.2
CG12290	10.1778	9.98916	9.99556	9.72241	9.76974	9.82153	-0.355791	0.0032699	6.5
CG12502	11.3965	11.7037	11.5714	11.0128	11.062	11.0588	-0.620798	5.37121e-07	3.9
CG12541	9.55144	9.59377	9.60318	8.82596	8.92599	8.7449	-0.971261	4.06926e-15	3.6
CG12605	13.4379	13.1668	13.1996	12.6025	12.791	12.8639	-0.606312	1.03705e-05	27.2
CG13650	11.6547	11.4868	11.4834	10.9533	11.0391	10.9326	-0.67962	2.33473e-10	0
CG13933	10.2935	10.1395	10.0406	9.93047	9.91045	9.98715	-0.270764	0.0300337	3.9
CG14186	12.3569	12.3663	12.5059	11.9834	11.3841	11.9184	-0.735365	0.000133788	4.9
CG14509	13.4622	13.4847	13.5125	12.9461	12.9352	12.9141	-0.650434	4.65313e-20	16.95
CG15894	11.6003	11.5715	11.8377	11.0877	11.4352	11.3108	-0.464536	0.00246789	5.9
CG17360	12.4356	12.173	12.2027	11.5872	11.8301	11.8065	-0.626994	5.6408e-06	6.5
CG17684	11.1761	10.5776	10.7198	9.60747	9.93932	9.84973	-1.2772	2.10295e-09	1.3
CG18467	9.84512	9.8631	9.75014	9.18697	9.06994	9.22325	-0.83913	3.35368e-12	0
CG18812	13.1481	12.8808	12.8999	12.1389	12.1706	12.2505	-0.93489	1.69309e-14	7.2
CG30158	11.5135	11.5115	11.5695	10.9987	11.1073	10.9749	-0.602416	1.3393e-10	16.9
CG3078	11.1672	11.2648	11.255	10.9624	11.0878	11.1203	-0.205826	0.0442627	3.6
CG31064	11.0857	11.3544	11.4443	10.9672	11.0234	11.0295	-0.356635	0.00951886	5.4
CG31191	11.0052	10.7027	10.8062	10.3191	10.5348	10.4461	-0.494773	0.000480332	16.7
CG31221	15.5559	15.2899	15.2065	15.0665	15.0727	15.0472	-0.346855	0.00720015	14.3
CG32486	12.7888	12.9629	12.8769	12.2073	12.2948	12.3639	-0.69219	2.69798e-11	2.3
CG32506	11.1751	11.2028	11.3526	10.9522	11.0639	11.0669	-0.261284	0.0166175	5.2
CG34114	12.4396	12.1844	12.3123	11.5263	11.8615	11.8584	-0.660007	1.28983e-05	14
CG34362	13.7376	13.5453	13.6222	12.8167	12.9535	12.9627	-0.849283	1.62428e-15	17.6
CG34394	12.1315	11.9904	12.0691	11.4101	11.6983	11.6311	-0.568267	6.55241e-06	17.6
CG3530	12.0555	12.2149	12.1482	11.8273	11.8783	11.9088	-0.319175	0.000738828	5.4
CG3632	10.8665	10.7989	10.837	10.4014	10.6419	10.6117	-0.337401	0.00475668	2.3
CG42339	10.0929	10.0897	10.1566	9.75385	9.83714	9.70834	-0.431288	4.67006e-05	1.3
CG42404	11.3969	11.242	11.3872	10.5166	10.8326	10.7951	-0.746857	1.0292e-07	18.75
CG42699	9.76911	10.0356	10.0682	9.52755	9.73093	9.72195	-0.378809	0.013754	9.3
CG42732	12.5404	12.3792	12.7232	12.1491	12.4544	12.2499	-0.311739	0.0400109	6.9
CG42797	10.7656	10.6535	10.728	10.1384	10.4503	10.4426	-0.443999	0.00167932	13.1
CG43737	12.874	12.9292	13.0541	12.0832	12.541	12.3489	-0.725128	3.98356e-06	8.8
CG43901	12.6615	12.3222	12.5162	11.5629	12.1014	12.0461	-0.686691	0.000388244	14.4
CG44247	13.0367	12.9269	12.9405	12.6316	12.6811	12.8273	-0.297026	0.00435207	15.4
CG5466	10.5201	10.496	10.4721	10.0358	10.2093	10.1985	-0.424383	0.000104233	10.25
CG6123	11.7536	11.6882	11.8728	11.0974	11.5978	11.3522	-0.485824	0.00398686	10.1
CG6330	12.0392	12.0811	12.1874	11.3558	11.2891	11.5875	-0.814963	4.2658e-10	3.9
CG6498	12.0544	12.0837	12.1971	11.5007	11.8585	11.8352	-0.440081	0.00234642	1.3
CG6966	11.4085	11.6373	11.2119	10.8361	11.1255	11.0455	-0.506811	0.00242066	5.2
CG7708	13.1879	12.9125	13.0162	12.0744	12.18	12.2038	-1.04696	1.95575e-18	5.9
CG8177	13.6965	13.6548	13.8183	12.6792	12.8754	12.9022	-1.05741	5.73827e-20	2.3
CG8602	10.9134	10.9835	10.8749	10.7125	10.6442	10.7707	-0.259591	0.00890588	4.9
CG8613	11.8823	11.8852	11.8914	10.9837	10.9026	10.9572	-1.11846	4.62495e-43	1.3
CG8641	10.6789	10.5103	10.5721	9.63067	9.68397	9.75391	-1.1072	1.36089e-22	23.1
CG9674	14.6537	14.6352	14.7408	13.897	14.1864	14.2359	-0.656572	6.36878e-07	8.5
CG9919	10.5248	10.6382	10.6584	10.3957	10.3428	10.3593	-0.296935	0.0027848	1.3
Cha	12.2737	12.5807	12.6426	11.8066	11.7724	11.7199	-0.877109	2.35245e-10	3.9
chrb	13.8001	13.8093	13.9128	13.3827	13.3845	13.4605	-0.50565	4.16068e-09	21.75
Dap160	12.6849	12.7624	12.9088	12.1749	12.3634	12.3684	-0.569213	2.50746e-06	9.5
dbo	11.1015	11.0175	11.0489	10.6191	10.6531	10.6563	-0.498929	1.12158e-08	12.45
dnc	13.6906	13.5347	13.6073	13.1873	13.1934	13.1268	-0.518697	8.07261e-09	29.15
Dop1R2	10.487	10.272	10.5152	9.81208	10.0912	9.90756	-0.600012	5.26296e-05	5.2
DOR	12.0804	12.4051	12.3822	11.8352	11.7104	11.794	-0.611583	5.70228e-06	5.4
dpr19	11.2335	11.0415	11.0713	10.6605	10.6492	10.5854	-0.58586	7.1825e-08	5.2
Drep-3	9.43861	9.56194	9.59171	8.99783	8.83947	8.87028	-0.815694	4.90133e-10	6.35
Eph	12.9315	12.5468	12.6329	12.0144	12.3326	12.2097	-0.615255	0.00014882	17.25
fru	11.7716	11.9867	12.3659	10.879	11.4196	10.9216	-1.14969	7.60419e-07	22.8
fry	11.9839	11.7469	11.8518	10.9538	11.5234	11.4786	-0.619064	0.00143756	1.3
Ggamma30A	16.0511	15.8258	15.9117	14.8437	15.0535	15.1411	-1.06551	5.21734e-16	48.3
glec	10.8666	10.868	10.7413	10.5601	10.3709	10.4685	-0.434198	0.000134967	5.95
gprs	12.0492	11.9188	12.1584	11.2741	11.5529	11.4506	-0.729931	5.35452e-08	9.8
Grip163	9.97243	9.76623	9.87011	9.48867	9.65229	9.67167	-0.333428	0.0122219	10.1
heph	14.2299	13.8288	14.0798	13.446	13.7551	13.6346	-0.512683	0.00118047	27.5
hipk	13.6394	12.8536	13.0753	12.1259	12.5577	12.4895	-0.973475	5.94809e-05	40.4
His3.3B	14.3523	14.3417	14.2895	14.0935	14.1522	14.1265	-0.238245	0.00119106	8
Hs6st	10.0267	9.91386	9.95078	9.52384	9.55877	9.60622	-0.503537	2.55574e-06	3.9
igl	13.7444	13.7314	13.7287	12.9207	12.9281	13.039	-0.903332	9.10241e-28	6.5
Kul	11.1825	11.196	11.0425	10.2939	10.7299	10.6529	-0.687048	2.62042e-05	4.6
Lgr1	8.33556	8.3783	8.20875	7.69992	8.14593	7.91175	-0.54659	0.0105823	3.9
Lin29	11.8684	11.4609	11.7332	11.077	11.5139	11.1751	-0.510999	0.00605143	2.3
Lnk	10.4196	10.6683	10.5454	10.1783	10.2436	10.2191	-0.411806	0.000567046	0
lola	13.7997	13.6654	13.8331	13.3775	13.5371	13.5118	-0.340174	0.00115447	10.4
Lpin	12.0503	12.6274	12.329	11.8728	11.9749	12.0326	-0.469645	0.00879688	3.9
mam	11.507	11.248	11.4272	10.5808	10.9981	10.9431	-0.653241	9.81045e-05	19.35
mbl	13.5679	12.9657	13.2141	12.2715	12.5687	12.5807	-0.929839	2.24246e-06	30.85
mei-P26	15.4712	15.178	15.3025	14.8303	14.9144	14.8324	-0.540235	3.84896e-06	121.1
Mkp3	12.054	11.8725	11.8521	11.2373	11.1233	11.3309	-0.827894	9.64399e-12	5.2
MKP-4	9.08767	9.04064	8.91174	8.80863	8.7846	8.77094	-0.302283	0.0203394	3.9
Mp	11.9598	11.899	12.0939	11.3643	11.6032	11.4927	-0.589433	1.4768e-06	5.2
msps	12.7769	12.627	12.7128	11.9766	12.4019	12.3604	-0.526093	0.000732434	5.95
Nedd4	11.4186	11.4036	11.4175	10.9906	11.1625	11.1325	-0.378198	0.000134495	1.3
Nmdar2	11.9775	11.8561	12.1973	10.8477	11.2969	11.1966	-1.05868	2.59531e-09	18.8
Nplp1	12.1746	12.1396	12.1639	11.801	11.8119	11.8204	-0.412319	2.08564e-08	7.8
nrv3	16.5505	16.3605	16.3743	15.5528	15.5483	15.656	-0.98422	1.6969e-21	16.9
Octbeta1R	12.006	11.807	11.9617	11.2401	11.4316	11.3854	-0.680722	7.33411e-09	11.4
Octbeta3R	10.7722	10.6827	10.8367	10.0272	10.4272	10.3208	-0.604126	0.000104094	5.2
Pdp1	14.4662	14.2749	14.2467	14.2253	14.1023	13.9437	-0.277233	0.0329828	19.7
Pkc53E	13.0022	12.8892	12.9975	12.3426	12.4665	12.3942	-0.660749	8.85863e-13	14.2
Pp1alpha-96A	11.953	11.912	11.8923	11.4245	11.4287	11.557	-0.531871	1.0564e-08	5.2
Pp2B-14D	11.742	11.5916	11.6575	11.0916	11.3181	11.2832	-0.513109	1.41115e-05	17.6
prt	9.66991	9.47489	9.43144	8.95374	8.92429	8.79331	-0.825844	1.31318e-08	1.3
Ptp99A	12.9809	12.7008	12.8121	12.1742	12.43	12.3886	-0.589129	1.59466e-05	14.3
Rab27	8.41836	9.02584	8.91503	8.4659	8.48022	8.38154	-0.508773	0.0262023	0
Rbp9	13.855	13.4743	13.5731	13.0692	13.4348	13.4066	-0.386843	0.022777	27.4
RhoGAPp190	13.2824	13.3149	13.4184	12.6881	13.0035	12.8687	-0.562928	8.34689e-06	6.5
roq	11.0183	10.7679	10.9212	10.1827	10.4118	10.3691	-0.706021	2.15473e-07	25
Rph	9.99349	10.1397	10.0776	9.76175	9.72033	9.87128	-0.357196	0.00218248	0
sbb	12.739	12.6186	12.6522	11.9945	12.3216	12.3084	-0.534788	8.14332e-05	15.45
sdt	12.3192	12.2733	12.384	11.9117	12.1503	12.061	-0.332586	0.00283109	7.5
SerT	9.37459	9.36107	9.5228	8.66178	8.70195	8.77038	-0.931011	1.05284e-12	1
Shawl	11.0309	10.8116	11.0078	10.3824	10.4795	10.5391	-0.58763	1.67249e-06	10.4
Smox	12.2989	12.0887	12.1108	11.7577	11.9656	11.8945	-0.347895	0.00428326	4.6
Src42A	11.359	11.2452	11.3228	11.091	11.1228	11.1269	-0.234843	0.00796441	13.45
SRPK	11.7718	11.7736	11.8813	11.1499	11.4722	11.5064	-0.504317	0.000416007	9.25
svr	13.4084	13.1546	13.1828	12.8966	13.0205	13.0368	-0.314352	0.00920051	7.5
Taf6	8.61892	8.91006	8.76323	8.35961	8.50744	8.60377	-0.379089	0.029181	0
Tbh	10.8911	10.8513	11.0196	10.3269	10.5008	10.5748	-0.546931	1.7827e-05	5.2
Tdc2	8.22074	8.47598	8.70873	8.27224	8.08935	8.19809	-0.420601	0.0473929	0
Ten-a	14.1136	14.0986	14.3682	13.2897	13.6994	13.5932	-0.772231	1.53115e-06	19.05
Tob	13.4635	13.1694	13.2514	12.5564	12.7476	12.7288	-0.727996	2.82439e-08	14.2
Ubc-E2H	12.1879	12.2363	12.1407	11.4126	11.4701	11.5229	-0.8533	9.44828e-22	5.4
Unc-76	13.0871	13.1392	13.1192	12.3171	12.4446	12.4276	-0.843686	1.49622e-22	10.4
vig	12.5598	12.6131	12.7141	12.4395	12.4429	12.4636	-0.214555	0.0159788	7.25
Vmat	14.5253	14.0988	14.4482	13.1749	13.43	13.5927	-1.12175	3.45693e-10	11.8

## Sheet: upregulated
gene_id	GAL4_1	GAL4_2	GAL4_3	RNAi_1	RNAi_2	RNAi_3	log2FoldChange	pvalue	AREScore
CG8814	9.06267	9.18006	9.08857	9.37096	9.3323	9.30324	0.290629	0.0132658	3.3
Dh31	11.4353	11.0718	11.0097	11.5361	11.5111	11.5712	0.422325	0.0068736	7.8
CG8401	8.0622	8.43562	8.19419	8.61544	8.75691	8.76293	0.654392	0.000445165	0
CG1707	7.12301	7.23141	7.1856	7.78557	7.61417	7.73515	0.865706	4.28055e-06	0
RpL19	12.1804	12.3646	12.0641	12.9436	12.7347	12.8787	0.760707	9.3273e-09	3.9
Akh	8.87979	9.31422	8.76257	10.6874	9.12381	9.95137	1.35043	0.0171682	2.75
Kap-alpha1	10.1942	10.2512	10.1092	10.4695	10.5822	10.614	0.453794	4.2142e-05	7.65
Mip	9.72578	9.97968	10.0531	10.7667	10.7006	10.792	1.01096	2.87282e-13	1.3
CG42675	5.88311	6.01116	5.68426	6.55025	6.62419	6.40705	1.49823	5.2277e-06	0
CG31368	8.95211	8.92414	9.04424	9.08146	9.29284	9.19411	0.28617	0.0377309	1.3
CG12279	7.10113	7.18474	7.04876	7.43369	7.3518	7.26253	0.408749	0.0420477	0
NPF	9.75326	9.32673	9.17644	9.92026	9.91056	9.89861	0.589789	0.0031847	2.6
CG11168	7.40343	7.44666	7.46258	7.83138	7.79657	7.76451	0.56755	0.00062131	3.6
Trissin	8.9796	8.88682	8.7974	9.6952	9.41468	9.59073	0.886477	5.00939e-09	0
Capa	9.59292	9.99594	9.59351	10.1029	10.2116	10.2857	0.570911	0.0011526	0
janA	6.96283	6.90764	6.78611	7.71545	7.58287	7.6011	1.26202	3.47654e-10	2.3
CG15743	7.58649	7.82528	7.76231	7.87701	8.01528	8.0252	0.368551	0.0445097	0
RpS10b	11.8398	11.7548	11.479	12.9241	12.6451	12.7895	1.28749	2.72945e-17	2.6
Cyp1	12.7265	12.5112	12.5895	13.1178	12.9682	13.1546	0.553003	1.76138e-06	0
CG8675	6.63669	7.08875	6.79646	7.25597	7.20385	7.21636	0.650424	0.0155532	0
Arp8	6.33334	6.59831	6.52387	6.89898	6.99684	6.81764	0.80401	0.00177405	6.9

## Sheet: Not significant
gene_id	GAL4_1	GAL4_2	GAL4_3	RNAi_1	RNAi_2	RNAi_3	log2FoldChange	pvalue	AREScore
Hop	9.59629	9.64895	9.81243	9.64181	10.0867	10.0875	0.333577	0.0749265	2.6
CG4577	14.2833	14.1326	14.111	13.9695	14.0968	14.0668	-0.15485	0.125888	9.3
Trs23	7.34156	7.32896	7.35963	7.63421	7.46037	7.47682	0.300357	0.107452	0
bru-2	7.77572	7.51306	7.75257	7.57821	7.69085	7.60106	-0.0951257	0.625732	8.5
sick	11.3998	11.2731	11.5095	10.9771	11.3146	11.2338	-0.256667	0.080918	7.7
sNPF	12.7469	12.4905	12.413	12.5252	12.5695	12.4949	-0.0328269	0.800559	8.55
IA-2	17.2498	17.2001	17.2516	16.9883	17.2374	17.2146	-0.0959481	0.384045	23.75
mtm	8.77762	9.05672	9.12463	9.09347	8.95294	9.0308	0.0397854	0.810289	0
Reps	10.0832	10.0598	10.2048	9.94016	10.1331	10.0513	-0.0916026	0.451293	16.8
Clamp	10.2275	10.2166	10.2367	10.0873	10.1772	10.0973	-0.13058	0.174074	3.9
FMRFa	7.96163	8.63692	8.42826	8.58638	8.70345	8.7411	0.417991	0.0925299	0
Den1	8.92994	9.03397	8.91817	8.96923	8.78859	8.80348	-0.140937	0.314462	0
tud	12.9201	12.49	12.6191	12.4978	13.0006	13.0002	0.193493	0.336856	4.8
Pal2	12.8033	12.8911	12.8891	12.7592	12.7566	12.8214	-0.0970645	0.235405	1.3
ITP	12.0172	11.7493	11.6002	11.5931	11.6255	11.5135	-0.26418	0.0755397	10.4
CG40498	12.1188	11.7967	11.966	12.138	12.0853	11.9622	0.114729	0.388443	6.2
slv	6.90979	6.86913	6.64339	6.56677	6.60871	6.56934	-0.448874	0.0657864	7.6
CG18336	5.85393	5.73333	5.88675	5.79717	6.08912	6.07728	0.427801	0.207146	0
CG8818	10.0581	10.4456	10.316	10.2617	10.0801	10.14	-0.14985	0.339423	1.3
CG6191	7.91453	7.66259	7.66758	7.56512	7.58401	7.65047	-0.236879	0.215852	2.6
phyl	10.0139	10.3004	10.2919	10.0772	9.87118	10.1429	-0.215207	0.169909	1.3
GPHR	8.87383	8.73232	8.78815	8.71738	8.62679	8.63793	-0.185589	0.163887	2.3
Iap2	10.8961	11.0832	11.1203	10.866	10.895	10.8759	-0.191122	0.0857379	1
DAT	10.0819	9.75047	9.81481	9.72928	9.75372	9.69271	-0.206003	0.159235	2.6
PTP-ER	11.2711	11.1996	11.2438	11.0306	11.2888	11.2192	-0.0649752	0.580357	3.9
Nap1	10.9336	11.1271	10.9276	11.151	11.0343	11.0997	0.115383	0.313959	0
CG30424	7.75003	7.76443	7.63285	7.68154	7.51747	7.77894	-0.0819612	0.669549	1
CG17180	7.14161	7.57061	7.56523	7.51255	7.39563	7.46703	0.0227832	0.926357	0
CG2469	11.0517	11.5303	11.5478	11.5717	11.5702	11.6614	0.243897	0.160756	1.3
CycJ	6.97859	6.73405	6.76487	6.92636	6.95435	6.74493	0.0938047	0.706766	1.3
CG12006	8.82093	8.52551	8.64257	8.65096	8.63411	8.67278	-0.0197569	0.899397	1
CG5537	8.5609	8.54533	8.63565	8.64614	8.62548	8.53261	0.0290177	0.829952	1.3
Dscam4	12.3767	12.1587	12.2833	11.7676	12.2089	12.1424	-0.262115	0.107582	9.1
CG5026	8.60372	8.82027	8.85564	8.82227	8.73097	8.66192	-0.0355729	0.820429	6.5
CG32112	9.67092	9.73063	9.67222	9.7267	9.6421	9.60667	-0.0407871	0.70817	2.6
CTPsyn	9.87574	9.94876	9.82674	9.87679	9.81246	9.75418	-0.0869871	0.433457	1.3
RAF2	8.93452	8.7754	8.83672	8.68933	9.06955	8.89925	0.0616605	0.726029	5.2
mbf1	10.5917	10.5667	10.5346	10.4837	10.6759	10.6244	0.0399464	0.712829	4.9
CG7564	10.7506	10.7402	11.0781	10.6314	10.7825	10.7738	-0.163954	0.275469	42.7
CG11306	10.0561	10.0059	9.97128	10.0864	10.0429	10.0646	0.0668328	0.491308	5.2
Trh	9.20631	9.3995	9.51264	9.11321	9.21954	9.22537	-0.250554	0.091982	0
sty	11.3397	11.0384	11.0305	11.1292	11.0133	11.0821	-0.0820055	0.55248	10.6
CG11593	9.64184	9.72133	9.58958	9.43483	9.49942	9.56341	-0.193597	0.0984324	3.6
CG32243	8.71015	8.51371	8.56658	8.52632	8.53058	8.57394	-0.0746178	0.601245	0
syd	11.6254	11.665	11.7851	11.3283	11.5862	11.5567	-0.235997	0.060916	7.8
Unr	14.2686	14.0423	14.0207	14.0833	14.0328	14.0499	-0.0700568	0.530572	19.15
nbs	8.73194	8.86782	8.67666	8.74561	8.85548	8.91074	0.103692	0.478403	0
CG6707	11.2269	11.1274	11.1658	11.2118	11.2162	11.2317	0.0555503	0.516005	7.95
wls	9.35388	9.20628	9.23437	9.1522	9.20277	9.17158	-0.116516	0.332041	2.3
CG6083	7.90149	7.96666	8.01485	8.04634	7.9981	8.01835	0.0863844	0.56859	1.3
Pallidin	7.08102	6.91977	6.88545	6.95454	6.87399	6.89485	-0.100417	0.643163	4.9
Taspase1	6.80574	7.00186	7.08803	6.88298	7.02589	6.88276	-0.0748765	0.752487	4.9
tub	9.15265	9.20729	9.0366	9.23433	9.22549	9.2473	0.132392	0.280434	1.3
CG12162	8.93864	9.3088	9.28365	9.28058	9.18837	9.24978	0.0652322	0.696674	0
CG8202	8.61741	8.41916	8.4383	8.63656	8.57655	8.50917	0.114012	0.451567	1.3
Snx3	9.8298	10.1698	10.1521	10.2808	10.2301	10.2981	0.257687	0.0790465	1.3
Su(var)3-7	9.15429	9.2921	9.48111	9.2023	9.35991	9.33866	-0.0200788	0.89794	7.5
natalisin	8.68655	9.02474	9.15964	9.26116	9.17539	9.18448	0.306107	0.0991249	1
Ms	12.2695	11.9787	11.7565	12.2657	12.2403	12.1877	0.251414	0.125214	2.6
CG11771	9.3211	9.58349	9.61472	9.56693	9.53956	9.57287	0.057338	0.685576	4.9
Hrb98DE	11.8181	11.8704	12.2034	12.0462	12.1377	12.1169	0.147641	0.31348	2.6
CG9603	11.4726	11.2579	11.2218	11.4498	11.1364	11.3006	-0.0238926	0.869776	1.3
CG11768	1.58186	1.53028	1.56824	1.55605	1.55826	1.58843	0.225156	0.85305	20.8
D1	10.4124	11.0161	11.0429	11.1756	11.1231	11.1488	0.352512	0.0836216	2.6
Kap-alpha3	11.5555	11.4698	11.4122	11.2327	11.307	11.3873	-0.202669	0.0504202	7.15
Taf12	9.29094	9.38322	9.16976	9.41894	9.38364	9.3432	0.12616	0.325723	3.8
CG5961	7.77634	7.86913	7.88273	7.83924	7.78802	7.69305	-0.106555	0.522929	0
CG6236	9.50035	9.61522	9.54354	9.58051	9.63459	9.63761	0.0799814	0.463018	0
CG12333	8.44643	9.08128	8.96321	8.98898	8.87848	8.87647	0.0720041	0.754485	0
CCAP	6.24706	6.48654	6.65783	6.83972	6.58218	6.77462	0.51598	0.0951137	0
CG10254	10.6835	10.6132	10.7312	10.425	10.6813	10.6505	-0.10475	0.408655	2.6
Miro	10.0398	10.1609	10.2148	10.0214	9.93409	9.99535	-0.195227	0.0812325	3.9
AstA	10.3192	10.331	10.0602	10.2207	10.1488	10.4389	0.0405076	0.795384	6.5
CG3744	10.7315	10.7921	10.8063	10.4765	10.7141	10.6808	-0.180989	0.129023	3.9
Ald	14.0997	14.1738	14.2142	13.9496	13.898	14.1433	-0.189314	0.0925732	7.8
Bub3	7.99638	8.07758	8.14611	8.18357	7.99846	8.19288	0.0767557	0.648465	0
CG16989	8.78118	8.78861	8.66228	8.80361	8.94391	9.00842	0.2374	0.100181	0
pn	8.07521	8.13293	8.10887	8.22041	8.06079	8.22222	0.0929502	0.550153	2.3
CG10555	9.75494	9.72804	9.85784	9.58874	9.77567	9.7381	-0.0986929	0.427486	15.05
CG17841	11.9475	11.8131	11.9036	11.9743	12.0242	12.016	0.137382	0.121144	2.6
fne	14.9496	14.7059	14.6532	14.7209	14.6602	14.6641	-0.109897	0.361982	33.6
ben	11.5461	11.503	11.5827	11.4918	11.4333	11.4436	-0.104671	0.210079	3.9
Ucp4A	9.50366	9.60192	9.64111	9.6226	9.52333	9.53302	-0.0304195	0.792799	1
CG6867	9.97958	9.92516	9.84164	9.90309	9.79769	9.88872	-0.0650979	0.557817	0
CG32544	10.0258	10.2006	10.2278	10.054	9.9986	10.0349	-0.156319	0.177248	3.6
CG17168	8.48197	8.91224	8.94027	9.07172	9.02379	8.91913	0.278963	0.158878	0
CG4281	8.86105	8.77857	8.63783	8.76258	8.8271	8.82908	0.0609226	0.666787	1.3
CG3446	10.6393	10.7319	10.7575	10.6314	10.4302	10.5411	-0.211491	0.0626636	0
Traf6	8.86434	8.81926	8.80966	8.74324	8.74358	8.65378	-0.157315	0.210154	0
CG1637	11.1759	11.2241	10.9855	11.127	11.0895	11.2119	0.0135178	0.909303	3.6
CG9170	11.9567	12.2274	12.4056	11.7705	12.067	11.9749	-0.31525	0.0601539	0
betaCOP	9.63958	10.0986	10.0358	10.1299	10.2374	10.157	0.28982	0.0930553	1
CG6961	7.07629	7.03785	6.95465	7.03352	7.0679	7.08149	0.0678213	0.732197	1.3
CG14613	8.48718	8.41222	8.22128	8.52916	8.48799	8.57922	0.216871	0.174131	3.9
