# Supplementary material for: Antagonistic roles for Ataxin-2 structured and disordered domains in RNP condensation
Source: eLife. 2021 Mar 10;10:e60326. doi: 10.7554/eLife.60326 (PMC7946432; doi:10.7554/eLife.60326)
Supplement: Figure 4—figure supplement 1—source data 1. [file elife-60326-fig4-figsupp1-data1.xlsx]

## Sheet: Sheet1
S.NO	Sample Name	Million reads (Paired end)		Total Number of Million reads	% >= Q30	Mean Quality Score	Mapping Percentage Read 1	Mapping Percentage Read 2
		Read 1	Read 2
1	GAL4 - 1	31.944	31.944	64	85.61	34.01	0.901	0.883
2	GAL4 - 2	30.652	30.652	62	85.59	34.01	0.898	0.875
3	UAS - 1	40.54	40.54	82	85.86	34.06	0.896	0.88
4	UAS - 2	42.8	42.8	86	86.02	34.09	0.906	0.891
5	Atx2 - 1	38.788	38.788	78	85.85	34.06	0.903	0.884
6	Atx2 - 2	34.264	34.264	68	85.34	33.96	0.892	0.871
7	Atx2 ΔLsm - 1	15.27	15.27	30.54	96.95	38.22	0.917	0.915
8	Atx2 ΔLsm - 2	16.36	16.36	32.72	96.15	37.95	0.873	0.871
9	Atx2 ΔLsm-AD - 1	20.925	20.925	41.85	96.99	38.23	0.928	0.927
10	Atx2 ΔLsm-AD - 2	14.325	14.325	28.65	96.65	38.12	0.921	0.918
11	Atx2 ΔmIDR - 1	26.945	26.945	53.89	95.51	37.79	0.92	0.913
12	Atx2 ΔmIDR - 2	29.18	29.18	58.36	95.68	37.83	0.925	0.919
13	Atx2 ΔcIDR - 1	26.645	26.645	53.29	95.34	37.75	91.6%	0.909
14	Atx2 ΔcIDR - 2	31.055	31.055	62.11	95.57	37.8	0.923	0.917
15	Only Lsm Lsm-AD - 1	28.12	28.12	56.24	95.62	37.81	0.92	0.914
16	Only Lsm Lsm-AD - 2	29.335	29.335	58.67	95.62	37.82	0.921	0.916
