# Supplementary material for: Antagonistic roles for Ataxin-2 structured and disordered domains in RNP condensation
Source: eLife. 2021 Mar 10;10:e60326. doi: 10.7554/eLife.60326 (PMC7946432; doi:10.7554/eLife.60326)
Supplement: Figure 4—source data 1. — mRNA targets identified for different Atx2 domain deletions. [file elife-60326-fig4-data1.xlsx]

## Sheet: Sheet1
TRIBE protein	Atx2 ΔLsm - ADARcd			Atx2 ΔLsm-AD - ADARcd			Atx2 ΔmIDR - ADARcd			Atx2 ΔcIDR - ADARcd			Atx2 Only Lsm Lsm-AD - ADARcd
Number of gene targets	403			178			162			40			37
	gene name	number of edits per gene		gene name	number of edits per gene		gene name	number of edits per gene		gene name	number of edits per gene		gene name	number of edits per gene
	Akh	6		Vmat	4		Akh	5		Akh	4		CG12093	4
	Rab27	6		Teh2	3		CG34362	4		CG12093	3		A2bp1	2
	CG12004	4		bol	3		CG30158	3		CG5687	2		CG45186	2
	Vmat	4		Mip	3		Vmat	3		CG12082	2		CG9977	2
	Ace	4		CG43444	3		mod(mdg4)	3		Gk	2		CG7029	2
	bol	3		CG30158	3		Ace	3		CRG	2		CG34127	2
	CG7852	3		Ace	3		NPF	3		CASK	2		Usp12-46	2
	Traf6	3		CG3822	3		Syp	3		Aprt	1		CG14164	1
	CG30158	3		NPF	3		Ms	3		ecd	1		CG14186	1
	Lpin	3		CASK	3		CG14186	2		Taf6	1		CG40470	1
	CG34362	3		Syp	3		CG12605	2		RpL10	1		Pxn	1
	CG34114	3		Ms	3		CG12093	2		CG4933	1		MEP-1	1
	Octbeta3R	3		CG6404	2		Mip	2		CG1291	1		Atg2	1
	beat-Vc	3		CG12605	2		A2bp1	2		Ncc69	1		CG8003	1
	NPF	3		hipk	2		CG7967	2		CG10616	1		CG6709	1
	prt	3		Con	2		sNPF	2		Klp68D	1		CG42245	1
	Ms	3		Teh3	2		IA-2	2		Ccn	1		CG32350	1
	ABCB7	2		pix	2		dnc	2		CG6024	1		CG6707	1
	Kap-alpha1	2		CG12093	2		Tbh	2		CG8814	1		CG16758	1
	CG12605	2		Akh	2		Lpin	2		CG42668	1		CG17698	1
	chrb	2		CG6707	2		FMRFa	2		CG7029	1		Gip	1
	CG12025	2		CG34356	2		Cbp53E	2		alpha-Man-II	1		mav	1
	CG12090	2		Ggamma30A	2		CRG	2		CG6171	1		NfI	1
	CG12093	2		IA-2	2		Octbeta3R	2		Glut4EF	1		myo	1
	Mip	2		dnc	2		GABA-B-R2	2		Dop1R2	1		Thd1	1
	CG8641	2		CR44832	2		natalisin	2		Bub3	1		CG4721	1
	CG7967	2		CG6867	2		Rlip	2		CG6125	1		CG2747	1
	CG6707	2		Tbh	2		smp-30	2		CG10324	1		E2f	1
	CG9977	2		CRG	2		CASK	2		CG9821	1		DppIII	1
	sNPF	2		Calx	2		Dscam4	1		E2f	1		Atx2	1
	CG15628	2		CG34362	2		eRF1	1		CG8176	1		CG9636	1
	Ggamma30A	2		Cortactin	2		RpL18	1		Usp12-46	1		Syp	1
	IA-2	2		Cha	2		GC	1		ps	1		CG7148	1
	CG31646	2		Octbeta3R	2		Psa	1		CG1887	1		mRpS35	1
	vig	2		GABA-B-R2	2		CG11306	1		Patj	1		CG7227	1
	beat-IIIc	2		natalisin	2		hipk	1		CG10907	1		CG42450	1
	dnc	2		CG11000	2		MEP-1	1		CG42450	1		cal1	1
	Unc-76	2		CG1105	2		CG32112	1		CG6867	1
	CG6294	2		Rlip	2		Pallidin	1		CG17528	1
	Pp2B-14D	2		ens	2		RpL10	1		NPF	1
	CG1637	2		CG14164	1		chrb	1
	fne	2		Dscam4	1		CG12006	1
	CG6123	2		CG7971	1		CG10289	1
	CR44832	2		CG18675	1		ple	1
	CG14476	2		CG11306	1		dbo	1
	CG11638	2		CG9674	1		bol	1
	CG6299	2		Pallidin	1		CG2199	1
	Pal2	2		Hr78	1		Trh	1
	CG17684	2		Mkrn1	1		CG42245	1
	CG3107	2		chrb	1		CG32350	1
	Iap2	2		CG44838	1		CG8641	1
	FMRFa	2		CG12006	1		Mp	1
	Cbp53E	2		Jarid2	1		CG13933	1
	ITP	2		CG8602	1		CG43444	1
	Capa	2		CG6709	1		mbf1	1
	14-3-3epsilon	2		CG5537	1		Klp68D	1
	CG11771	2		nwk	1		Ccn	1
	CG43427	2		Trh	1		scramb1	1
	Dop1R2	2		CG8641	1		CG6024	1
	CG7785	2		CG43367	1		CG11593	1
	CG12162	2		CG3529	1		PVRAP	1
	AstA	2		Mp	1		CG9977	1
	CG11000	2		A2bp1	1		Mkp3	1
	Sur-8	2		CG11577	1		Ggamma30A	1
	CG6404	1		CG13933	1		beat-IIIc	1
	CG14164	1		mbf1	1		Bsg	1
	GluRIB	1		Ccn	1		Unc-76	1
	alphaCOP	1		Fdxh	1		CG4281	1
	CG2469	1		Tequila	1		NetB	1
	Dscam4	1		CG5026	1		ben	1
	CG7971	1		dre4	1		CG43347	1
	CG32373	1		CG8177	1		His3.3B	1
	CG12104	1		CG17698	1		CG1402	1
	CTPsyn	1		CG9977	1		mei-P26	1
	Blos2	1		sNPF	1		CG42797	1
	CG5687	1		CG4577	1		CG3446	1
	syd	1		grp	1		svr	1
	GC	1		Hop	1		CG42541	1
	CG3680	1		beat-IIIc	1		RhoGAPp190	1
	Psa	1		CG33303	1		CG1637	1
	CG11306	1		Gip	1		Ucp4A	1
	CG40045	1		ben	1		CG42339	1
	CG9674	1		His3.3B	1		CG8675	1
	hipk	1		CG1402	1		Ten-a	1
	MEP-1	1		mei-P26	1		fne	1
	CG32112	1		CG42797	1		CG3078	1
	Pallidin	1		CG6294	1		CG9170	1
	RpL10	1		svr	1		Rab3-GEF	1
	Mob2	1		CG42541	1		CR44832	1
	CG12006	1		CG17163	1		CG6867	1
	CG10289	1		RhoGAPp190	1		CG11638	1
	I-2	1		CG1637	1		Syt12	1
	dbo	1		CG42339	1		CG15743	1
	pix	1		Ten-a	1		CG44247	1
	CG8602	1		fne	1		Pal2	1
	CG32486	1		CG12541	1		CG8818	1
	CG6709	1		CG4199	1		SerT	1
	CG5537	1		CG6123	1		CG14762	1
	Psn	1		RpS10b	1		phyl	1
	nwk	1		CG6299	1		CG18467	1
	Spn	1		CG44247	1		PTP-ER	1
	Trh	1		Drep-3	1		Iap2	1
	CG42245	1		Pal2	1		DAT	1
	Mkp	1		Syngr	1		Nplp1	1
	sif	1		CG8818	1		gprs	1
	Trn	1		lola	1		CG40498	1
	CG6498	1		CG8520	1		Den1	1
	CG3529	1		CG18812	1		GPHR	1
	Mp	1		CG18467	1		CG42668	1
	CG13685	1		Lpin	1		NK7.1	1
	CG40178	1		Iap2	1		slo	1
	CG11577	1		mbl	1		jvl	1
	CG12502	1		Nplp1	1		pre-mod(mdg4)-X	1
	Ank2	1		Corin	1		Noa36	1
	Capr	1		Camta	1		Cortactin	1
	rgn	1		gprs	1		Syt14	1
	mbf1	1		Den1	1		tok	1
	Klp68D	1		Cbp53E	1		Dop1R2	1
	nSyb	1		Src42A	1		Bub3	1
	Ccn	1		CG42668	1		pre-mod(mdg4)-U	1
	scramb1	1		Capa	1		Cha	1
	Fdxh	1		tub	1		beat-VI	1
	mRpL23	1		alpha-Man-II	1		eIF-3p66	1
	CG6024	1		Mgat2	1		CG7956	1
	CG13917	1		14-3-3epsilon	1		spg	1
	Grip163	1		Glut4EF	1		pre-mod(mdg4)-V	1
	Tequila	1		Gprk2	1		Saf-B	1
	CG13921	1		CG10254	1		Hs6st	1
	CG11593	1		mod(mdg4)	1		CG31221	1
	dre4	1		CG12171	1		CG17270	1
	Hsp26	1		VAChT	1		CG1523	1
	sty	1		Dop1R2	1		AstA	1
	roq	1		sima	1		Rpn9	1
	CG16758	1		CG7956	1		CG13630	1
	Cct1	1		CG34114	1		Atpalpha	1
	Fife	1		CG2747	1		Vha13	1
	not	1		Hs6st	1		Ptp99A	1
	CG14982	1		CG31221	1		Hexim	1
	CG34140	1		CG1943	1		Hrb98DE	1
	CG34394	1		CG6236	1		prt	1
	Lar	1		Octbeta1R	1		heph	1
	sick	1		eIF4G2	1		CG40470	1
	Rab30	1		CG8176	1		Pxn	1
	B4	1		Atpalpha	1		CG42673	1
	CG4577	1		CG7911	1		CG12090	1
	Dh31	1		Ptp99A	1		Unr	1
	SamDC	1		ps	1		Grip163	1
	DLP	1		CG8861	1		roq	1
	PGAP5	1		mura	1		CG6674	1
	CG10631	1		CG33111	1		CG14982	1
	gammaTub23C	1		Hrb98DE	1		Rab27	1
	Mtp	1		prt	1		CG42450	1
	Hop	1		smg	1		CG10555	1
	Shawl	1		ago	1		CG30424	1
	Ostgamma	1		CG13893	1		CG8401	1
	nrv3	1		Unr	1		CG11771	1
	mtm	1		Trs23	1		SNF4Agamma	1
	Trs23	1		Unc-76	1		CG17271	1
	GlcAT-S	1		CG4281	1		beat-Vc	1
	CG8814	1		CG43737	1		CG5961	1
	toc	1		CG9170	1		GstZ1	1
	Dyrk2	1		Lin29	1		CG1105	1
	CG4230	1		CG17528	1
	CG3887	1		sbb	1
	Rbp9	1		phyl	1
	Uch	1		CG42496	1
	Trx-2	1		PTP-ER	1
	Clamp	1		Pkc53E	1
	CG2258	1		SRPK	1
	CG17168	1		mam	1
	Smox	1		Ppcdc	1
	CG4281	1		CG1104	1
	Gip	1		Bub3	1
	CHOp24	1		Snx3	1
	Vap-33A	1		CG17271	1
	ben	1		Vha26	1
	CG43347	1		beat-Vc	1
	His3.3B	1		CG11779	1
	CG1402	1
	CanB	1
	mei-P26	1
	CG42797	1
	CG43737	1
	Syx16	1
	CG2701	1
	shi	1
	svr	1
	Vav	1
	RhoGAPp190	1
	CG9919	1
	CG17065	1
	sdt	1
	CG6961	1
	CG9947	1
	CG42339	1
	Ten-a	1
	CG12541	1
	comt	1
	CG4199	1
	CG3078	1
	Cyp1	1
	CG9170	1
	Rab3-GEF	1
	CG6867	1
	CG11122	1
	Klp10A	1
	CoVIb	1
	RpS10b	1
	Syt12	1
	CG15743	1
	Eph	1
	CG1909	1
	hig	1
	bonsai	1
	CG44247	1
	Sema-2a	1
	sbb	1
	Syngr	1
	CG8818	1
	HPS4	1
	bic	1
	Gint3	1
	lola	1
	PI31	1
	CG8520	1
	phyl	1
	Pde8	1
	RpL19	1
	Mgat1	1
	NKAIN	1
	Rgk1	1
	CG18467	1
	CG42496	1
	CG42678	1
	Liprin-gamma	1
	Ns2	1
	CG42306	1
	CG34370	1
	Pkc53E	1
	Epac	1
	robl	1
	CG30463	1
	Sema-1b	1
	Drep-1	1
	CG12343	1
	mam	1
	CG14764	1
	Corin	1
	Camta	1
	gprs	1
	Ppcdc	1
	CG1513	1
	CG40498	1
	CG3530	1
	CG15236	1
	Den1	1
	CG8401	1
	CG8243	1
	Src42A	1
	Mlf	1
	CG13594	1
	conu	1
	sda	1
	Mvl	1
	tub	1
	alpha-Man-II	1
	beat-VII	1
	pre-mod(mdg4)-X	1
	Dscam3	1
	Trissin	1
	Hmu	1
	CG6654	1
	Cortactin	1
	CG13409	1
	CG13650	1
	Glut4EF	1
	CG4884	1
	Cdep	1
	Taf12	1
	Lnk	1
	CG34135	1
	Prosbeta3	1
	CG6966	1
	Synd	1
	btsz	1
	Pp1alpha-96A	1
	mod(mdg4)	1
	Rb97D	1
	CG5466	1
	CG6330	1
	twf	1
	Ald	1
	CG42487	1
	pre-mod(mdg4)-U	1
	Cha	1
	lute	1
	CG18766	1
	CG12290	1
	CG11768	1
	eIF-3p66	1
	Kap-alpha3	1
	XNP	1
	Snx3	1
	Bruce	1
	cpo	1
	CG45050	1
	CG3744	1
	pre-mod(mdg4)-V	1
	CG3822	1
	beat-IIa	1
	Vha26	1
	klg	1
	Cog7	1
	CG6364	1
	Hs6st	1
	CG31221	1
	Gycbeta100B	1
	GABA-B-R2	1
	CG6236	1
	CG8176	1
	MTA1-like	1
	Atpalpha	1
	msps	1
	SIDL	1
	CG42322	1
	CG42404	1
	Tsp97E	1
	Set	1
	CG15537	1
	Ptp99A	1
	ps	1
	CG8861	1
	Klp98A	1
	Rlip	1
	CG31064	1
	Hrb98DE	1
	CG9603	1
	glec	1
	Miro	1
	CG11779	1
	D1	1
	heph	1
	Syp	1
	mRpS10	1
	Gad1	1
	mRpL46	1
	CG14186	1
	Taf6	1
	CG42673	1
	Prp3	1
	mRpS35	1
	CG10565	1
	CG13933	1
	Unr	1
	Pdxk	1
	CG5026	1
	Rdl	1
	CG6083	1
	CG10671	1
	alphaSnap	1
	CG7239	1
	CG10413	1
	Dap160	1
	CG9175	1
	CG31708	1
	CG10561	1
	CG4972	1
	lmgB	1
	CenG1A	1
	lmgA	1
	Ubc-E2H	1
	CG42684	1
	Amun	1
	su(f)	1
	CG3638	1
	44075	1
	dlg1	1
	REG	1
	CG4004	1
	Fbxl4	1
	CG8289	1
	Syt7	1
	mus210	1
	Drep-3	1
	mtt	1
	CG6191	1
	CSN4	1
	CG45088	1
	CG30424	1
	TppII	1
	CG17385	1
	Galphas	1
	hth	1
	Mgat2	1
	SNF4Agamma	1
	Syt14	1
	CG7071	1
	gro	1
	Bub3	1
	Sap47	1
	CG7708	1
	Atx2	1
	Muted	1
