# Supplementary material for: Antagonistic roles for Ataxin-2 structured and disordered domains in RNP condensation
Source: eLife. 2021 Mar 10;10:e60326. doi: 10.7554/eLife.60326 (PMC7946432; doi:10.7554/eLife.60326)
Supplement: Figure 4—source data 2. — Edit percentages for Atx2-target mRNAs identified using different domain deletions. [file elife-60326-fig4-data2.xlsx]

## Sheet: Atx2 ΔLsm
chr	start	end	CG	Replicate 1 edit percentage	Replicate 2 edit percentage	Average edit percentage	chr_coord
chr2L	1009440	1009441	IA-2	34.9	38.7	36.8	chr2L_1009441_IA-2
chr2L	1011482	1011483	IA-2	22.7	18.9	20.8	chr2L_1011483_IA-2
chr2L	10317295	10317296	CG4972	16.7	19.5	18.1	chr2L_10317296_CG4972
chr2L	10340747	10340748	SamDC	17.9	15.3	16.6	chr2L_10340748_SamDC
chr2L	1140698	1140699	CG4577	34.3	39.3	36.8	chr2L_1140699_CG4577
chr2L	13503306	13503307	B4	20	17.4	18.7	chr2L_13503307_B4
chr2L	13897477	13897478	CenG1A	16.12	22.2	19.16	chr2L_13897478_CenG1A
chr2L	14188892	14188893	Dyrk2	19.55	18.2	18.88	chr2L_14188893_Dyrk2
chr2L	15064071	15064072	vig	19.6	18.3	18.95	chr2L_15064072_vig
chr2L	15064410	15064411	vig	32.9	29.35	31.12	chr2L_15064411_vig
chr2L	17187836	17187837	beat-IIIc	24.1	17.9	21	chr2L_17187837_beat-IIIc
chr2L	17188307	17188308	beat-IIIc	47.5	42.6	45.05	chr2L_17188308_beat-IIIc
chr2L	18600397	18600398	CG10413	20	26.9	23.45	chr2L_18600398_CG10413
chr2L	19114911	19114912	CG10561	24.2	20.8	22.5	chr2L_19114912_CG10561
chr2L	19731786	19731787	Lar	22.7	20.8	21.75	chr2L_19731787_Lar
chr2L	19743281	19743282	CG10631	21.4	25	23.2	chr2L_19743282_CG10631
chr2L	19957940	19957941	sick	30	40.7	35.35	chr2L_19957941_sick
chr2L	20055344	20055345	sNPF	22	31.1	26.55	chr2L_20055345_sNPF
chr2L	20056018	20056019	sNPF	55.4	48.1	51.75	chr2L_20056019_sNPF
chr2L	20919249	20919250	Mtp	22.9	17.4	20.15	chr2L_20919250_Mtp
chr2L	21135901	21135902	Dap160	21.68	17.1	19.39	chr2L_21135902_Dap160
chr2L	21392924	21392925	nrv3	28.93	27.53	28.23	chr2L_21392925_nrv3
chr2L	2212875	2212876	Uch	38.5	22	30.25	chr2L_2212876_Uch
chr2L	22168191	22168192	Clamp	20.25	33.3	26.77	chr2L_22168192_Clamp
chr2L	2877081	2877082	CG8814	53.1	34	43.55	chr2L_2877082_CG8814
chr2L	2965942	2965943	Rbp9	17.75	17.45	17.6	chr2L_2965943_Rbp9
chr2L	297368	297369	Hop	31.6	43.5	37.55	chr2L_297369_Hop
chr2L	2974697	2974698	gammaTub23C	24.3	19.4	21.85	chr2L_2974698_gammaTub23C
chr2L	3069711	3069712	toc	23.2	26.5	24.85	chr2L_3069712_toc
chr2L	3358751	3358752	CG34394	17.8	22.1	19.95	chr2L_3358752_CG34394
chr2L	4827378	4827379	CG15628	21.1	26.2	23.65	chr2L_4827379_CG15628
chr2L	4828389	4828390	CG15628	19.12	16.3	17.71	chr2L_4828390_CG15628
chr2L	5012089	5012090	CG3887	20.8	21.7	21.25	chr2L_5012090_CG3887
chr2L	5098032	5098033	CG4230	19.95	26.95	23.45	chr2L_5098033_CG4230
chr2L	5626441	5626442	CG31646	18.5	22.2	20.35	chr2L_5626442_CG31646
chr2L	5627050	5627051	CG31646	22.25	18.8	20.52	chr2L_5627051_CG31646
chr2L	5803476	5803477	CG7239	16	42.9	29.45	chr2L_5803477_CG7239
chr2L	6035121	6035122	mtm	22.9	42.4	32.65	chr2L_6035122_mtm
chr2L	6098807	6098808	CG9175	19.4	30	24.7	chr2L_6098808_CG9175
chr2L	6486862	6486863	DLP	18	32.4	25.2	chr2L_6486863_DLP
chr2L	7031191	7031192	Rab30	35.3	27.3	31.3	chr2L_7031192_Rab30
chr2L	8200348	8200349	PGAP5	30.6	18	24.3	chr2L_8200349_PGAP5
chr2L	8307004	8307005	Ostgamma	15.6	19.4	17.5	chr2L_8307005_Ostgamma
chr2L	8492201	8492202	Dh31	19.25	17.7	18.48	chr2L_8492202_Dh31
chr2L	8525772	8525773	lmgA	25	40.7	32.85	chr2L_8525773_lmgA
chr2L	8525772	8525773	lmgB	25	40.7	32.85	chr2L_8525773_lmgB
chr2L	8686453	8686454	Trs23	17.4	23.4	20.4	chr2L_8686454_Trs23
chr2L	9052432	9052433	CG31708	16.7	18.4	17.55	chr2L_9052433_CG31708
chr2L	9292530	9292531	Ggamma30A	20.5	19.2	19.85	chr2L_9292531_Ggamma30A
chr2L	9292829	9292830	Ggamma30A	25.5	19.8	22.65	chr2L_9292830_Ggamma30A
chr2L	9371087	9371088	Shawl	23.1	26.5	24.8	chr2L_9371088_Shawl
chr2L	9615862	9615863	Trx-2	25.3	17.3	21.3	chr2L_9615863_Trx-2
chr2L	9617499	9617500	GlcAT-S	17	21.7	19.35	chr2L_9617500_GlcAT-S
chr2R	10541456	10541457	lola	34.6	24.1	29.35	chr2R_10541457_lola
chr2R	10822779	10822780	CG12343	31.3	27.5	29.4	chr2R_10822780_CG12343
chr2R	11967345	11967346	PI31	25.9	23.5	24.7	chr2R_11967346_PI31
chr2R	12049969	12049970	Drep-1	25.65	19.07	22.36	chr2R_12049970_Drep-1
chr2R	12062421	12062422	Drep-3	20.7	20.4	20.55	chr2R_12062422_Drep-3
chr2R	12338753	12338754	Den1	56.5	40	48.25	chr2R_12338754_Den1
chr2R	12425282	12425283	CG8520	19.2	27.6	23.4	chr2R_12425283_CG8520
chr2R	12517404	12517405	CG8818	29	29.8	29.4	chr2R_12517405_CG8818
chr2R	12871336	12871337	bic	20.3	16.4	18.35	chr2R_12871337_bic
chr2R	13153287	13153288	TppII	17.8	17.1	17.45	chr2R_13153288_TppII
chr2R	13513577	13513578	Vmat	56.5	51.4	53.95	chr2R_13513578_Vmat
chr2R	13513736	13513737	Vmat	18.3	17.2	17.75	chr2R_13513737_Vmat
chr2R	13513762	13513763	Vmat	42.1	40.95	41.53	chr2R_13513763_Vmat
chr2R	13514350	13514351	Vmat	30.6	19.6	25.1	chr2R_13514351_Vmat
chr2R	13583328	13583329	CG45088	26.75	25.9	26.32	chr2R_13583329_CG45088
chr2R	13583328	13583329	CG6191	26.75	25.9	26.32	chr2R_13583329_CG6191
chr2R	13842873	13842874	Syngr	26.1	17.4	21.75	chr2R_13842874_Syngr
chr2R	14059308	14059309	mam	18.3	20	19.15	chr2R_14059309_mam
chr2R	14411503	14411504	CG17385	16.5	21.9	19.2	chr2R_14411504_CG17385
chr2R	14427738	14427739	phyl	33.8	37.4	35.6	chr2R_14427739_phyl
chr2R	15313055	15313056	mus210	18.9	15.2	17.05	chr2R_15313056_mus210
chr2R	15932449	15932450	Iap2	50	38.4	44.2	chr2R_15932450_Iap2
chr2R	15932472	15932473	Iap2	24.6	24.8	24.7	chr2R_15932473_Iap2
chr2R	15936239	15936240	Mlf	30.6	30.9	30.75	chr2R_15936240_Mlf
chr2R	16029936	16029937	CG8401	21.1	26.2	23.65	chr2R_16029937_CG8401
chr2R	16533195	16533196	Sema-2a	15.2	16.3	15.75	chr2R_16533196_Sema-2a
chr2R	16650269	16650270	gprs	31.3	30.3	30.8	chr2R_16650270_gprs
chr2R	16673646	16673647	CG30463	18.2	23.1	20.65	chr2R_16673647_CG30463
chr2R	16943374	16943375	Pkc53E	21.7	20.4	21.05	chr2R_16943375_Pkc53E
chr2R	16995053	16995054	Cbp53E	38.6	31.6	35.1	chr2R_16995054_Cbp53E
chr2R	16995078	16995079	Cbp53E	35.48	27.48	31.48	chr2R_16995079_Cbp53E
chr2R	17442329	17442330	CG18467	29.8	25.9	27.85	chr2R_17442330_CG18467
chr2R	17457067	17457068	robl	17.9	19.3	18.6	chr2R_17457068_robl
chr2R	17566602	17566603	Ns2	34.3	26.1	30.2	chr2R_17566603_Ns2
chr2R	17673936	17673937	Sema-1b	29.2	22.2	25.7	chr2R_17673937_Sema-1b
chr2R	17690231	17690232	HPS4	28.12	26.45	27.29	chr2R_17690232_HPS4
chr2R	18278779	18278780	sbb	23.2	25	24.1	chr2R_18278780_sbb
chr2R	18658537	18658538	CG42306	18.2	17.5	17.85	chr2R_18658538_CG42306
chr2R	18658537	18658538	Gint3	18.2	17.5	17.85	chr2R_18658538_Gint3
chr2R	1866961	1866962	CG17684	35.6	19	27.3	chr2R_1866962_CG17684
chr2R	1926543	1926544	CG17684	15.2	16.3	15.75	chr2R_1926544_CG17684
chr2R	19311221	19311222	Rgk1	21.9	15.5	18.7	chr2R_19311222_Rgk1
chr2R	20559364	20559365	Mgat1	22.2	15.8	19	chr2R_20559365_Mgat1
chr2R	21692243	21692244	CG42496	15.8	20.4	18.1	chr2R_21692244_CG42496
chr2R	21692243	21692244	Ppcdc	15.8	20.4	18.1	chr2R_21692244_Ppcdc
chr2R	21987367	21987368	CG34370	22.9	15.7	19.3	chr2R_21987368_CG34370
chr2R	22333865	22333866	Liprin-gamma	18.55	21.9	20.23	chr2R_22333866_Liprin-gamma
chr2R	22638529	22638530	bonsai	19	25.4	22.2	chr2R_22638530_bonsai
chr2R	22925557	22925558	CG42678	19.1	16.7	17.9	chr2R_22925558_CG42678
chr2R	23389433	23389434	CG3530	23.1	31.7	27.4	chr2R_23389434_CG3530
chr2R	23680223	23680224	Pde8	20	26.9	23.45	chr2R_23680224_Pde8
chr2R	23690228	23690229	Pal2	27.05	25.3	26.18	chr2R_23690229_Pal2
chr2R	23690701	23690702	Pal2	59.1	38.2	48.65	chr2R_23690702_Pal2
chr2R	23946832	23946833	Galphas	17.2	18.5	17.85	chr2R_23946833_Galphas
chr2R	24558544	24558545	ITP	26.7	21.1	23.9	chr2R_24558545_ITP
chr2R	24558853	24558854	ITP	18	23.2	20.6	chr2R_24558854_ITP
chr2R	24615973	24615974	CG13594	15.4	15.5	15.45	chr2R_24615974_CG13594
chr2R	24880256	24880257	CG44247	31.1	34	32.55	chr2R_24880257_CG44247
chr2R	24887627	24887628	NKAIN	23.8	18.2	21	chr2R_24887628_NKAIN
chr2R	24965494	24965495	CG30424	30.8	35.2	33	chr2R_24965495_CG30424
chr2R	24968403	24968404	RpL19	26.7	32.7	29.7	chr2R_24968404_RpL19
chr2R	4757561	4757562	conu	17	15.9	16.45	chr2R_4757562_conu
chr2R	5092671	5092672	CG3107	26.7	20	23.35	chr2R_5092672_CG3107
chr2R	5092903	5092904	CG3107	16.9	16.3	16.6	chr2R_5092904_CG3107
chr2R	6011934	6011935	Src42A	29.5	19	24.25	chr2R_6011935_Src42A
chr2R	6760460	6760461	Epac	19.2	22.3	20.75	chr2R_6760461_Epac
chr2R	6829749	6829750	CG15236	21.38	27.3	24.34	chr2R_6829750_CG15236
chr2R	6920815	6920816	CG30158	50.17	42	46.09	chr2R_6920816_CG30158
chr2R	6921435	6921436	CG30158	22.9	35.3	29.1	chr2R_6921436_CG30158
chr2R	6921976	6921977	CG30158	46.3	55.2	50.75	chr2R_6921977_CG30158
chr2R	7562285	7562286	Corin	20.3	17.2	18.75	chr2R_7562286_Corin
chr2R	7942379	7942380	CG14764	21.4	15.8	18.6	chr2R_7942380_CG14764
chr2R	7973016	7973017	CSN4	20	20	20	chr2R_7973017_CSN4
chr2R	8137317	8137318	Lpin	26.6	29.8	28.2	chr2R_8137318_Lpin
chr2R	8137322	8137323	Lpin	46.2	56.8	51.5	chr2R_8137323_Lpin
chr2R	8137323	8137324	Lpin	17.9	16.3	17.1	chr2R_8137324_Lpin
chr2R	8475074	8475075	mtt	17.4	18.5	17.95	chr2R_8475075_mtt
chr2R	8925177	8925178	CG8243	33.3	28.6	30.95	chr2R_8925178_CG8243
chr2R	9228524	9228525	hig	16.3	19.7	18	chr2R_9228525_hig
chr2R	926167	926168	CG40498	44.9	37.3	41.1	chr2R_926168_CG40498
chr2R	9480019	9480020	Camta	28	15.5	21.75	chr2R_9480020_Camta
chr2R	9887300	9887301	CG1513	23.52	25.9	24.71	chr2R_9887301_CG1513
chr2R	9910327	9910328	FMRFa	48.1	57.7	52.9	chr2R_9910328_FMRFa
chr2R	9910328	9910329	FMRFa	69.2	73.1	71.15	chr2R_9910329_FMRFa
chr3L	10223027	10223028	scramb1	27.8	17.2	22.5	chr3L_10223028_scramb1
chr3L	10885046	10885047	CG6404	15	16.7	15.85	chr3L_10885047_CG6404
chr3L	11061971	11061972	Blos2	20	23.7	21.85	chr3L_11061972_Blos2
chr3L	11496673	11496674	chrb	19.8	15.4	17.6	chr3L_11496674_chrb
chr3L	11498209	11498210	chrb	39.88	33.07	36.48	chr3L_11498210_chrb
chr3L	11523582	11523583	Mob2	23.8	45.3	34.55	chr3L_11523583_Mob2
chr3L	11625711	11625712	CG6083	24.1	18.2	21.15	chr3L_11625712_CG6083
chr3L	11689959	11689960	Pallidin	57.1	45.5	51.3	chr3L_11689960_Pallidin
chr3L	11734470	11734471	CG6024	28.3	40.7	34.5	chr3L_11734471_CG6024
chr3L	11797296	11797297	Klp68D	31.8	20	25.9	chr3L_11797297_Klp68D
chr3L	1190747	1190748	Trh	23.7	30.4	27.05	chr3L_1190748_Trh
chr3L	11993873	11993874	Grip163	30.8	15	22.9	chr3L_11993874_Grip163
chr3L	12742951	12742952	CG32112	19.1	16	17.55	chr3L_12742952_CG32112
chr3L	1309736	1309737	CG2469	27.12	20.15	23.63	chr3L_1309737_CG2469
chr3L	1504295	1504296	Psa	51.2	56.5	53.85	chr3L_1504296_Psa
chr3L	15112510	15112511	CTPsyn	30.55	36.53	33.54	chr3L_15112511_CTPsyn
chr3L	1524713	1524714	CG12090	20.7	19.5	20.1	chr3L_1524714_CG12090
chr3L	1525047	1525048	CG12090	25	34.08	29.54	chr3L_1525048_CG12090
chr3L	1540490	1540491	CG7852	37.5	25	31.25	chr3L_1540491_CG7852
chr3L	1542146	1542147	CG7852	32.3	17.9	25.1	chr3L_1542147_CG7852
chr3L	1543675	1543676	CG7852	44.3	50	47.15	chr3L_1543676_CG7852
chr3L	1551536	1551537	Cct1	24.7	16.7	20.7	chr3L_1551537_Cct1
chr3L	15575751	15575752	CG6498	27.6	25	26.3	chr3L_15575752_CG6498
chr3L	1572662	1572663	CG12004	50.27	43.05	46.66	chr3L_1572663_CG12004
chr3L	1575515	1575516	CG12004	27.5	40	33.75	chr3L_1575516_CG12004
chr3L	1575516	1575517	CG12004	24.1	65.2	44.65	chr3L_1575517_CG12004
chr3L	1575610	1575611	CG12004	15.2	17.8	16.5	chr3L_1575611_CG12004
chr3L	15831129	15831130	dbo	28.3	23.8	26.05	chr3L_15831130_dbo
chr3L	1600476	1600477	CG13917	34.27	18.12	26.2	chr3L_1600477_CG13917
chr3L	1601840	1601841	CG12104	40	27.3	33.65	chr3L_1601841_CG12104
chr3L	1622802	1622803	ABCB7	47.1	47.1	47.1	chr3L_1622803_ABCB7
chr3L	1623377	1623378	ABCB7	55	46.7	50.85	chr3L_1623378_ABCB7
chr3L	1623513	1623514	GC	24.32	45.38	34.85	chr3L_1623514_GC
chr3L	1634812	1634813	nSyb	28.7	41.7	35.2	chr3L_1634813_nSyb
chr3L	16371176	16371177	roq	28	24.3	26.15	chr3L_16371177_roq
chr3L	1642210	1642211	alphaCOP	22.75	19.6	21.18	chr3L_1642211_alphaCOP
chr3L	1652462	1652463	CG7967	68.6	72.7	70.65	chr3L_1652463_CG7967
chr3L	1652567	1652568	CG7967	83.9	90.9	87.4	chr3L_1652568_CG7967
chr3L	16576650	16576651	mbf1	32.8	38.52	35.66	chr3L_16576651_mbf1
chr3L	1658047	1658048	CG7971	48.7	54.5	51.6	chr3L_1658048_CG7971
chr3L	16787702	16787703	CG9674	37.9	35.82	36.86	chr3L_16787703_CG9674
chr3L	17345219	17345220	Mip	49.1	56.9	53	chr3L_17345220_Mip
chr3L	17345290	17345291	Mip	50	48.8	49.4	chr3L_17345291_Mip
chr3L	1752275	1752276	CG13921	20.9	26.2	23.55	chr3L_1752276_CG13921
chr3L	1772623	1772624	CG13933	17	16.1	16.55	chr3L_1772624_CG13933
chr3L	17748777	17748778	Ccn	51.2	35.2	43.2	chr3L_17748778_Ccn
chr3L	1777572	1777573	mRpL46	28.6	22.15	25.38	chr3L_1777573_mRpL46
chr3L	182674	182675	CG34140	25	31.5	28.25	chr3L_182675_CG34140
chr3L	182674	182675	Mkp	25	31.5	28.25	chr3L_182675_Mkp
chr3L	18619451	18619452	not	26.7	18.2	22.45	chr3L_18619452_not
chr3L	18668581	18668582	Capr	22	32.8	27.4	chr3L_18668582_Capr
chr3L	1867600	1867601	CG12025	22.2	36.4	29.3	chr3L_1867601_CG12025
chr3L	1868857	1868858	CG12025	29.2	20.4	24.8	chr3L_1868858_CG12025
chr3L	1873853	1873854	dre4	38.1	43.5	40.8	chr3L_1873854_dre4
chr3L	19095223	19095224	CG11577	51.4	27	39.2	chr3L_19095224_CG11577
chr3L	1935408	1935409	CG5687	28.3	15.6	21.95	chr3L_1935409_CG5687
chr3L	19600608	19600609	Taf6	17.2	24	20.6	chr3L_19600609_Taf6
chr3L	19809996	19809997	Kap-alpha1	28.1	16.3	22.2	chr3L_19809997_Kap-alpha1
chr3L	19810051	19810052	Kap-alpha1	31.9	26.85	29.38	chr3L_19810052_Kap-alpha1
chr3L	19911197	19911198	Prp3	22.2	48.3	35.25	chr3L_19911198_Prp3
chr3L	20098661	20098662	CG14186	21.4	26.7	24.05	chr3L_20098662_CG14186
chr3L	20316527	20316528	alphaSnap	16.7	20.7	18.7	chr3L_20316528_alphaSnap
chr3L	20434933	20434934	Psn	24.4	28.6	26.5	chr3L_20434934_Psn
chr3L	20813222	20813223	CG3680	16.7	24.2	20.45	chr3L_20813223_CG3680
chr3L	21133915	21133916	CG10565	15.6	19.4	17.5	chr3L_21133916_CG10565
chr3L	21423542	21423543	rgn	24.6	20.3	22.45	chr3L_21423543_rgn
chr3L	21628052	21628053	CG11306	25.9	37	31.45	chr3L_21628053_CG11306
chr3L	23093359	23093360	RpL10	45.5	41.9	43.7	chr3L_23093360_RpL10
chr3L	2373227	2373228	mRpL23	31.7	21.4	26.55	chr3L_2373228_mRpL23
chr3L	24035772	24035773	CG40045	19.6	24.9	22.25	chr3L_24035773_CG40045
chr3L	2500029	2500030	CG16758	37.62	33.05	35.33	chr3L_2500030_CG16758
chr3L	2507974	2507975	Spn	21.1	16.4	18.75	chr3L_2507975_Spn
chr3L	25874324	25874325	CG40178	16	18.5	17.25	chr3L_25874325_CG40178
chr3L	2640503	2640504	CG42245	39.2	21.1	30.15	chr3L_2640504_CG42245
chr3L	2640503	2640504	MEP-1	39.2	21.1	30.15	chr3L_2640504_MEP-1
chr3L	2671689	2671690	Fife	17.5	19.6	18.55	chr3L_2671690_Fife
chr3L	2769794	2769795	CG9977	24.1	22	23.05	chr3L_2769795_CG9977
chr3L	2770050	2770051	CG9977	35.9	17.9	26.9	chr3L_2770051_CG9977
chr3L	2773175	2773176	CG12093	25	24.4	24.7	chr3L_2773176_CG12093
chr3L	2773217	2773218	CG12093	29.2	24	26.6	chr3L_2773218_CG12093
chr3L	2781004	2781005	mRpS35	36.8	26	31.4	chr3L_2781005_mRpS35
chr3L	3056247	3056248	CG32486	18.1	20.8	19.45	chr3L_3056248_CG32486
chr3L	3404376	3404377	sty	23.5	26.1	24.8	chr3L_3404377_sty
chr3L	3813706	3813707	CG12006	47.6	35.5	41.55	chr3L_3813707_CG12006
chr3L	3946169	3946170	CG14982	15.1	15.9	15.5	chr3L_3946170_CG14982
chr3L	3954338	3954339	CG12605	47.3	44.3	45.8	chr3L_3954339_CG12605
chr3L	3954933	3954934	CG12605	53.83	40.42	47.12	chr3L_3954934_CG12605
chr3L	4037801	4037802	CG11593	28.93	33.17	31.05	chr3L_4037802_CG11593
chr3L	4075145	4075146	Gad1	20.05	18	19.02	chr3L_4075146_Gad1
chr3L	4141910	4141911	Akh	42.1	39.8	40.95	chr3L_4141911_Akh
chr3L	4141931	4141932	Akh	28.9	28.3	28.6	chr3L_4141932_Akh
chr3L	4141940	4141941	Akh	39.6	39	39.3	chr3L_4141941_Akh
chr3L	4142002	4142003	Akh	28.45	20.43	24.44	chr3L_4142003_Akh
chr3L	4142008	4142009	Akh	26.3	25.3	25.8	chr3L_4142009_Akh
chr3L	4142019	4142020	Akh	87.9	89.3	88.6	chr3L_4142020_Akh
chr3L	5144522	5144523	CG10671	15.4	23.3	19.35	chr3L_5144523_CG10671
chr3L	5749095	5749096	sif	21	15.7	18.35	chr3L_5749096_sif
chr3L	580103	580104	hipk	39	42.3	40.65	chr3L_580104_hipk
chr3L	5811703	5811704	CG5537	16.3	16.7	16.5	chr3L_5811704_CG5537
chr3L	6167466	6167467	CG10289	25	15	20	chr3L_6167467_CG10289
chr3L	6198797	6198798	Trn	21.3	23.3	22.3	chr3L_6198798_Trn
chr3L	7052849	7052850	Mp	43.12	40.5	41.81	chr3L_7052850_Mp
chr3L	7059402	7059403	CG8641	20	17.1	18.55	chr3L_7059403_CG8641
chr3L	7060195	7060196	CG8641	34.2	36.6	35.4	chr3L_7060196_CG8641
chr3L	7326677	7326678	CG8602	25.05	42.5	33.77	chr3L_7326678_CG8602
chr3L	7705312	7705313	Ank2	15.7	24.7	20.2	chr3L_7705313_Ank2
chr3L	7750322	7750323	CG13685	18.4	16.5	17.45	chr3L_7750323_CG13685
chr3L	7750322	7750323	CG32373	18.4	16.5	17.45	chr3L_7750323_CG32373
chr3L	7926334	7926335	syd	18.45	35.1	26.77	chr3L_7926335_syd
chr3L	8281656	8281657	Dscam4	48.4	32.1	40.25	chr3L_8281657_Dscam4
chr3L	8432694	8432695	Unr	43.02	27.9	35.46	chr3L_8432695_Unr
chr3L	871118	871119	CG12502	18.6	19.6	19.1	chr3L_871119_CG12502
chr3L	8970787	8970788	CG5026	35.3	18.2	26.75	chr3L_8970788_CG5026
chr3L	8973570	8973571	pix	20.85	17.3	19.08	chr3L_8973571_pix
chr3L	9074752	9074753	Tequila	53	22.4	37.7	chr3L_9074753_Tequila
chr3L	9098881	9098882	bol	26.9	20.1	23.5	chr3L_9098882_bol
chr3L	9103274	9103275	bol	22.4	23.8	23.1	chr3L_9103275_bol
chr3L	9103318	9103319	bol	31	18.7	24.85	chr3L_9103319_bol
chr3L	9141113	9141114	nwk	19.8	19.35	19.58	chr3L_9141114_nwk
chr3L	9166975	9166976	Rdl	18.2	18.2	18.2	chr3L_9166976_Rdl
chr3L	9287678	9287679	GluRIB	21.2	18.5	19.85	chr3L_9287679_GluRIB
chr3L	9361719	9361720	Pdxk	15	18.6	16.8	chr3L_9361720_Pdxk
chr3L	9370774	9370775	Fdxh	36.4	30.3	33.35	chr3L_9370775_Fdxh
chr3L	9377198	9377199	Hsp26	33.3	19.7	26.5	chr3L_9377199_Hsp26
chr3L	9449475	9449476	CG3529	16.7	16.7	16.7	chr3L_9449476_CG3529
chr3L	9594059	9594060	CG42673	44.03	16.1	30.07	chr3L_9594060_CG42673
chr3L	9834469	9834470	I-2	15	21.2	18.1	chr3L_9834470_I-2
chr3L	9894180	9894181	CG14164	19.6	32.1	25.85	chr3L_9894181_CG14164
chr3L	9894180	9894181	CG6709	19.6	32.1	25.85	chr3L_9894181_CG6709
chr3L	9894876	9894877	CG6707	31.5	39.7	35.6	chr3L_9894877_CG6707
chr3L	9896304	9896305	CG6707	23.98	21.3	22.64	chr3L_9896305_CG6707
chr3R	10312261	10312262	Bruce	28.7	25.4	27.05	chr3R_10312262_Bruce
chr3R	10585909	10585910	hth	17.4	15.2	16.3	chr3R_10585910_hth
chr3R	11048283	11048284	CG34114	15.4	16.7	16.05	chr3R_11048284_CG34114
chr3R	11048321	11048322	CG34114	18.2	36.4	27.3	chr3R_11048322_CG34114
chr3R	11049555	11049556	CG34114	24.7	18.2	21.45	chr3R_11049556_CG34114
chr3R	11678497	11678498	Taf12	21	16.2	18.6	chr3R_11678498_Taf12
chr3R	12512093	12512094	Octbeta3R	41	57.7	49.35	chr3R_12512094_Octbeta3R
chr3R	12512094	12512095	Octbeta3R	20.5	28	24.25	chr3R_12512095_Octbeta3R
chr3R	12512613	12512614	Octbeta3R	20.05	36.4	28.23	chr3R_12512614_Octbeta3R
chr3R	12629867	12629868	Snx3	26.8	25.9	26.35	chr3R_12629868_Snx3
chr3R	12746230	12746231	beat-Vc	30.23	57.8	44.02	chr3R_12746231_beat-Vc
chr3R	12746370	12746371	beat-Vc	15.6	18.2	16.9	chr3R_12746371_beat-Vc
chr3R	12746935	12746936	beat-Vc	27.3	17.4	22.35	chr3R_12746936_beat-Vc
chr3R	13224637	13224638	Ace	35.4	25	30.2	chr3R_13224638_Ace
chr3R	13224640	13224641	Ace	19.7	15.4	17.55	chr3R_13224641_Ace
chr3R	13227870	13227871	Ace	28.1	29.2	28.65	chr3R_13227871_Ace
chr3R	13227970	13227971	Ace	38.28	33.58	35.93	chr3R_13227971_Ace
chr3R	14124342	14124343	twf	15.2	20	17.6	chr3R_14124343_twf
chr3R	14804349	14804350	btsz	15	25.5	20.25	chr3R_14804350_btsz
chr3R	15080604	15080605	CG6966	19.2	44.4	31.8	chr3R_15080605_CG6966
chr3R	15211507	15211508	CG6654	16.1	16.2	16.15	chr3R_15211508_CG6654
chr3R	15214918	15214919	SIDL	20.7	15	17.85	chr3R_15214919_SIDL
chr3R	15230295	15230296	mRpS10	24.5	21.3	22.9	chr3R_15230296_mRpS10
chr3R	15257681	15257682	CG42404	16.7	17.9	17.3	chr3R_15257682_CG42404
chr3R	15265113	15265114	Set	23.4	28.2	25.8	chr3R_15265114_Set
chr3R	15326149	15326150	CG6236	41.45	31.6	36.53	chr3R_15326150_CG6236
chr3R	15414613	15414614	Atx2	15.7	15.8	15.75	chr3R_15414614_Atx2
chr3R	15484786	15484787	Trissin	22.3	16	19.15	chr3R_15484787_Trissin
chr3R	15935468	15935469	Sap47	19.6	18.2	18.9	chr3R_15935469_Sap47
chr3R	16059839	16059840	msps	39.7	26.7	33.2	chr3R_16059840_msps
chr3R	16611235	16611236	NPF	25.6	18.4	22	chr3R_16611236_NPF
chr3R	16611267	16611268	NPF	66.68	63.77	65.23	chr3R_16611268_NPF
chr3R	16611317	16611318	NPF	55	50.3	52.65	chr3R_16611318_NPF
chr3R	17345961	17345962	beat-IIa	52.6	45.7	49.15	chr3R_17345962_beat-IIa
chr3R	17389907	17389908	lute	23.3	16	19.65	chr3R_17389908_lute
chr3R	17396363	17396364	Sur-8	43.3	16.1	29.7	chr3R_17396364_Sur-8
chr3R	17396593	17396594	Sur-8	34.1	20.5	27.3	chr3R_17396594_Sur-8
chr3R	17476240	17476241	Dscam3	17.3	20	18.65	chr3R_17476241_Dscam3
chr3R	18016393	18016394	cpo	21.1	36.1	28.6	chr3R_18016394_cpo
chr3R	18022772	18022773	CG7785	20.88	33.03	26.95	chr3R_18022773_CG7785
chr3R	18022908	18022909	CG7785	25.9	34.2	30.05	chr3R_18022909_CG7785
chr3R	18249735	18249736	14-3-3epsilon	33.75	22.38	28.06	chr3R_18249736_14-3-3epsilon
chr3R	18249758	18249759	14-3-3epsilon	28.4	26.6	27.5	chr3R_18249759_14-3-3epsilon
chr3R	18684727	18684728	CG7708	30.1	30	30.05	chr3R_18684728_CG7708
chr3R	18730760	18730761	Cha	25.5	25	25.25	chr3R_18730761_Cha
chr3R	19155252	19155253	CG11779	19	28.6	23.8	chr3R_19155253_CG11779
chr3R	19458496	19458497	CG31221	21.45	16.02	18.73	chr3R_19458497_CG31221
chr3R	19929633	19929634	Hs6st	38.9	61.3	50.1	chr3R_19929634_Hs6st
chr3R	20620046	20620047	CG5466	21.9	20.5	21.2	chr3R_20620047_CG5466
chr3R	20755470	20755471	CG42322	18.8	15	16.9	chr3R_20755471_CG42322
chr3R	20797469	20797470	Syp	36	15.9	25.95	chr3R_20797470_Syp
chr3R	20839803	20839804	Synd	16.88	19.7	18.29	chr3R_20839804_Synd
chr3R	20862212	20862213	CG3822	36.2	25	30.6	chr3R_20862213_CG3822
chr3R	20971205	20971206	Atpalpha	27.3	20.35	23.83	chr3R_20971206_Atpalpha
chr3R	21019630	21019631	Rlip	45.3	17.6	31.45	chr3R_21019631_Rlip
chr3R	21051965	21051966	Mvl	26.9	25.9	26.4	chr3R_21051966_Mvl
chr3R	21062579	21062580	Cortactin	33.98	32.6	33.29	chr3R_21062580_Cortactin
chr3R	21213891	21213892	SNF4Agamma	47.6	17.4	32.5	chr3R_21213892_SNF4Agamma
chr3R	21368960	21368961	pre-mod(mdg4)-U	31.8	23.3	27.55	chr3R_21368961_pre-mod(mdg4)-U
chr3R	21368960	21368961	pre-mod(mdg4)-V	31.8	23.3	27.55	chr3R_21368961_pre-mod(mdg4)-V
chr3R	21368960	21368961	pre-mod(mdg4)-X	31.8	23.3	27.55	chr3R_21368961_pre-mod(mdg4)-X
chr3R	21372655	21372656	mod(mdg4)	23.9	16.4	20.15	chr3R_21372656_mod(mdg4)
chr3R	21771771	21771772	GABA-B-R2	37.88	27.57	32.73	chr3R_21771772_GABA-B-R2
chr3R	21851359	21851360	glec	23.1	22.2	22.65	chr3R_21851360_glec
chr3R	22029593	22029594	CG13409	31.8	24.4	28.1	chr3R_22029594_CG13409
chr3R	22363765	22363766	CG7071	20	20	20	chr3R_22363766_CG7071
chr3R	22363765	22363766	Muted	20	20	20	chr3R_22363766_Muted
chr3R	22961141	22961142	klg	18.1	20.6	19.35	chr3R_22961142_klg
chr3R	23681622	23681623	eIF-3p66	32.4	25.5	28.95	chr3R_23681623_eIF-3p66
chr3R	23696673	23696674	prt	19.1	34.1	26.6	chr3R_23696674_prt
chr3R	23697691	23697692	prt	41.4	34.1	37.75	chr3R_23697692_prt
chr3R	23698883	23698884	prt	36.6	28.6	32.6	chr3R_23698884_prt
chr3R	24035637	24035638	Miro	28.52	21.93	25.23	chr3R_24035638_Miro
chr3R	24293242	24293243	CG6364	17.5	16.3	16.9	chr3R_24293243_CG6364
chr3R	24343481	24343482	Ms	31.3	31.9	31.6	chr3R_24343482_Ms
chr3R	24343590	24343591	Ms	33.5	35.85	34.67	chr3R_24343591_Ms
chr3R	24343597	24343598	Ms	37.6	38	37.8	chr3R_24343598_Ms
chr3R	24520384	24520385	Pp1alpha-96A	30.4	28.93	29.66	chr3R_24520385_Pp1alpha-96A
chr3R	24760622	24760623	AstA	17	21.2	19.1	chr3R_24760623_AstA
chr3R	24760629	24760630	AstA	16.3	30.8	23.55	chr3R_24760630_AstA
chr3R	24874183	24874184	CG3744	28.3	23.8	26.05	chr3R_24874184_CG3744
chr3R	24934256	24934257	CG11771	18.2	26.7	22.45	chr3R_24934257_CG11771
chr3R	24934667	24934668	CG11771	29.45	29.95	29.7	chr3R_24934668_CG11771
chr3R	25111176	25111177	CG13650	25.9	32.1	29	chr3R_25111177_CG13650
chr3R	25477947	25477948	XNP	16.7	21.7	19.2	chr3R_25477948_XNP
chr3R	25891048	25891049	Lnk	30.8	31.8	31.3	chr3R_25891049_Lnk
chr3R	26048641	26048642	gro	15.1	29.7	22.4	chr3R_26048642_gro
chr3R	26233920	26233921	CG12290	43.3	21.7	32.5	chr3R_26233921_CG12290
chr3R	26254260	26254261	Ald	38.35	32.15	35.25	chr3R_26254261_Ald
chr3R	26647080	26647081	beat-VII	23	18.2	20.6	chr3R_26647081_beat-VII
chr3R	26873026	26873027	Rb97D	22.9	33.3	28.1	chr3R_26873027_Rb97D
chr3R	26943448	26943449	sda	32.7	16	24.35	chr3R_26943449_sda
chr3R	26950158	26950159	CG6330	16.7	27.6	22.15	chr3R_26950159_CG6330
chr3R	26962975	26962976	Tsp97E	36.7	19.15	27.93	chr3R_26962976_Tsp97E
chr3R	27231027	27231028	CG31064	27.1	23.6	25.35	chr3R_27231028_CG31064
chr3R	27242584	27242585	CG18766	18.12	27.3	22.71	chr3R_27242585_CG18766
chr3R	27291351	27291352	Hmu	33.3	30.2	31.75	chr3R_27291352_Hmu
chr3R	27548103	27548104	Klp98A	15.1	18.8	16.95	chr3R_27548104_Klp98A
chr3R	27958006	27958007	CG42487	34.8	16.7	25.75	chr3R_27958007_CG42487
chr3R	27958006	27958007	CG4884	34.8	16.7	25.75	chr3R_27958007_CG4884
chr3R	28086941	28086942	CG34362	16.3	29.4	22.85	chr3R_28086942_CG34362
chr3R	28087830	28087831	CG34362	16.2	15.4	15.8	chr3R_28087831_CG34362
chr3R	28088797	28088798	CG34362	17.6	20.5	19.05	chr3R_28088798_CG34362
chr3R	28604876	28604877	Hrb98DE	37.6	34.9	36.25	chr3R_28604877_Hrb98DE
chr3R	29486937	29486938	Ptp99A	20.7	20.5	20.6	chr3R_29486938_Ptp99A
chr3R	29630420	29630421	Dop1R2	35	23.7	29.35	chr3R_29630421_Dop1R2
chr3R	29631479	29631480	Dop1R2	17	34.8	25.9	chr3R_29631480_Dop1R2
chr3R	29674515	29674516	Bub3	52.9	57.1	55	chr3R_29674516_Bub3
chr3R	29913008	29913009	Capa	24.6	18.4	21.5	chr3R_29913009_Capa
chr3R	29914297	29914298	Capa	15.6	27.77	21.68	chr3R_29914298_Capa
chr3R	29931051	29931052	Cog7	18.5	26.1	22.3	chr3R_29931052_Cog7
chr3R	30015657	30015658	Mgat2	17.1	35	26.05	chr3R_30015658_Mgat2
chr3R	30443395	30443396	CG15537	16.1	17.2	16.65	chr3R_30443396_CG15537
chr3R	31178196	31178197	Gycbeta100B	26.2	23.5	24.85	chr3R_31178197_Gycbeta100B
chr3R	31849069	31849070	heph	19.8	15.3	17.55	chr3R_31849070_heph
chr3R	4314519	4314520	Syt14	16.7	44.8	30.75	chr3R_4314520_Syt14
chr3R	4389531	4389532	tub	23.3	15.2	19.25	chr3R_4389532_tub
chr3R	4709729	4709730	CG43427	17.52	30.75	24.13	chr3R_4709730_CG43427
chr3R	4711179	4711180	CG43427	19.12	16.7	17.91	chr3R_4711180_CG43427
chr3R	4938984	4938985	Cdep	16.3	15.4	15.85	chr3R_4938985_Cdep
chr3R	5468356	5468357	CG12162	20	27.9	23.95	chr3R_5468357_CG12162
chr3R	5469209	5469210	CG12162	15.6	21.4	18.5	chr3R_5469210_CG12162
chr3R	5595125	5595126	Vha26	17.4	26.5	21.95	chr3R_5595126_Vha26
chr3R	5638831	5638832	MTA1-like	23.8	18.2	21	chr3R_5638832_MTA1-like
chr3R	5811503	5811504	CG11000	35.9	31.3	33.6	chr3R_5811504_CG11000
chr3R	5811505	5811506	CG11000	16.9	25	20.95	chr3R_5811506_CG11000
chr3R	8339959	8339960	CG9603	29	18.7	23.85	chr3R_8339960_CG9603
chr3R	8749475	8749476	CG11768	15.4	30.2	22.8	chr3R_8749476_CG11768
chr3R	8749475	8749476	CG34135	15.4	30.2	22.8	chr3R_8749476_CG34135
chr3R	9005454	9005455	Prosbeta3	18.8	22.2	20.5	chr3R_9005455_Prosbeta3
chr3R	9238165	9238166	D1	32.27	26.2	29.23	chr3R_9238166_D1
chr3R	9294676	9294677	CG8861	39.1	28.6	33.85	chr3R_9294677_CG8861
chr3R	9360520	9360521	CG45050	15.6	18.5	17.05	chr3R_9360521_CG45050
chr3R	9416762	9416763	alpha-Man-II	41	50	45.5	chr3R_9416763_alpha-Man-II
chr3R	9441505	9441506	ps	54.85	54.8	54.83	chr3R_9441506_ps
chr3R	9525979	9525980	CG8176	45	41.9	43.45	chr3R_9525980_CG8176
chr3R	9575365	9575366	Kap-alpha3	35.55	32.23	33.89	chr3R_9575366_Kap-alpha3
chr3R	9992706	9992707	Glut4EF	53.5	60.3	56.9	chr3R_9992707_Glut4EF
chr4	279849	279850	Syt7	15.5	15.6	15.55	chr4_279850_Syt7
chr4	589267	589268	CG1909	15.6	24.7	20.15	chr4_589268_CG1909
chr4	620551	620552	Eph	28	20	24	chr4_620552_Eph
chrX	1014305	1014306	CG11638	26.8	31.4	29.1	chrX_1014306_CG11638
chrX	1014552	1014553	CG11638	19.7	22.2	20.95	chrX_1014553_CG11638
chrX	10329252	10329253	Gip	22.05	18.55	20.3	chrX_10329253_Gip
chrX	10604129	10604130	CG43347	28.2	17	22.6	chrX_10604130_CG43347
chrX	10873988	10873989	CG1637	45.8	33.9	39.85	chrX_10873989_CG1637
chrX	10874247	10874248	CG1637	20.9	26.4	23.65	chrX_10874248_CG1637
chrX	10967983	10967984	CG42339	40.7	50	45.35	chrX_10967984_CG42339
chrX	11112602	11112603	CG11122	40.8	29.7	35.25	chrX_11112603_CG11122
chrX	11130565	11130566	Klp10A	15.7	22	18.85	chrX_11130566_Klp10A
chrX	11406800	11406801	dlg1	16.2	18.9	17.55	chrX_11406801_dlg1
chrX	11711247	11711248	Amun	15.2	23.7	19.45	chrX_11711248_Amun
chrX	1215510	1215511	CG3638	17.6	17.6	17.6	chrX_1215511_CG3638
chrX	12331302	12331303	Ten-a	55.1	40	47.55	chrX_12331303_Ten-a
chrX	12747337	12747338	CG4004	20.8	19.2	20	chrX_12747338_CG4004
chrX	12918853	12918854	fne	15	16.7	15.85	chrX_12918854_fne
chrX	12946535	12946536	fne	25	24.05	24.52	chrX_12946536_fne
chrX	13213505	13213506	REG	15.9	22.2	19.05	chrX_13213506_REG
chrX	13261418	13261419	comt	17.1	18.7	17.9	chrX_13261419_comt
chrX	13287341	13287342	CG15743	38.5	30.3	34.4	chrX_13287342_CG15743
chrX	13367888	13367889	Syt12	61.1	43.6	52.35	chrX_13367889_Syt12
chrX	13999224	13999225	ben	35.6	40.1	37.85	chrX_13999225_ben
chrX	14235034	14235035	Fbxl4	20.8	16.7	18.75	chrX_14235035_Fbxl4
chrX	1473957	1473958	Rab27	24.3	17.8	21.05	chrX_1473958_Rab27
chrX	1473977	1473978	Rab27	19.3	26.9	23.1	chrX_1473978_Rab27
chrX	1474082	1474083	Rab27	34.75	29.95	32.35	chrX_1474083_Rab27
chrX	1474133	1474134	Rab27	27.15	23.75	25.45	chrX_1474134_Rab27
chrX	1474762	1474763	Rab27	33.3	28.6	30.95	chrX_1474763_Rab27
chrX	1474763	1474764	Rab27	17	24.7	20.85	chrX_1474764_Rab27
chrX	15113676	15113677	Rab3-GEF	24.3	16	20.15	chrX_15113677_Rab3-GEF
chrX	15189234	15189235	CG43737	27	20.5	23.75	chrX_15189235_CG43737
chrX	15464337	15464338	CG6294	27.6	20	23.8	chrX_15464338_CG6294
chrX	15464337	15464338	CG6299	27.6	20	23.8	chrX_15464338_CG6299
chrX	15466724	15466725	CG6294	23.5	16.7	20.1	chrX_15466725_CG6294
chrX	15466724	15466725	CG6299	23.5	16.7	20.1	chrX_15466725_CG6299
chrX	15905441	15905442	shi	22.8	15.1	18.95	chrX_15905442_shi
chrX	15978235	15978236	CG9170	27.9	32	29.95	chrX_15978236_CG9170
chrX	16317797	16317798	Cyp1	28.53	22.7	25.62	chrX_16317798_Cyp1
chrX	16329335	16329336	CG9919	24	28.4	26.2	chrX_16329336_CG9919
chrX	16439963	16439964	CG9947	18.4	18.6	18.5	chrX_16439964_CG9947
chrX	16554942	16554943	Pp2B-14D	20	15	17.5	chrX_16554943_Pp2B-14D
chrX	16555347	16555348	Pp2B-14D	20	18.78	19.39	chrX_16555348_Pp2B-14D
chrX	17633810	17633811	CG8289	15	15.2	15.1	chrX_17633811_CG8289
chrX	17639803	17639804	RhoGAPp190	31.3	37.3	34.3	chrX_17639804_RhoGAPp190
chrX	17748996	17748997	CG42684	19.4	35	27.2	chrX_17748997_CG42684
chrX	18028094	18028095	CG6867	25.9	25.5	25.7	chrX_18028095_CG6867
chrX	18323531	18323532	CG6123	18.7	17.9	18.3	chrX_18323532_CG6123
chrX	18323840	18323841	CG6123	20.4	36.2	28.3	chrX_18323841_CG6123
chrX	18786950	18786951	CG6961	21.7	16.7	19.2	chrX_18786951_CG6961
chrX	19272437	19272438	Vav	34.4	24.1	29.25	chrX_19272438_Vav
chrX	19599039	19599040	RpS10b	43.8	28.1	35.95	chrX_19599040_RpS10b
chrX	19740696	19740697	CoVIb	19.4	19	19.2	chrX_19740697_CoVIb
chrX	20255392	20255393	CG17065	21.75	29.75	25.75	chrX_20255393_CG17065
chrX	20392550	20392551	Syx16	15.8	22.5	19.15	chrX_20392551_Syx16
chrX	2062681	2062682	CG4281	45	20	32.5	chrX_2062682_CG4281
chrX	2066778	2066779	CG4199	34.3	23.3	28.8	chrX_2066779_CG4199
chrX	2092846	2092847	Unc-76	16.2	21.28	18.74	chrX_2092847_Unc-76
chrX	2093422	2093423	Unc-76	21.2	28.2	24.7	chrX_2093423_Unc-76
chrX	21361272	21361273	Sep1	17.9	26.7	22.3	chrX_21361273_Sep1
chrX	21601039	21601040	CG14476	17.35	18.8	18.08	chrX_21601040_CG14476
chrX	21601051	21601052	CG14476	27.05	26.57	26.81	chrX_21601052_CG14476
chrX	2254793	2254794	CG3078	21.4	36.1	28.75	chrX_2254794_CG3078
chrX	23083730	23083731	CG17168	39.38	25	32.19	chrX_23083731_CG17168
chrX	23100685	23100686	su(f)	18.2	17.2	17.7	chrX_23100686_su(f)
chrX	2718463	2718464	CG2701	28	22.2	25.1	chrX_2718464_CG2701
chrX	3321068	3321069	dnc	22.4	38.7	30.55	chrX_3321069_dnc
chrX	3341767	3341768	dnc	16.5	16	16.25	chrX_3341768_dnc
chrX	3954401	3954402	Vap-33A	20.8	18.8	19.8	chrX_3954402_Vap-33A
chrX	4542271	4542272	CHOp24	30.4	25	27.7	chrX_4542272_CHOp24
chrX	503511	503512	svr	54.7	54.7	54.7	chrX_503512_svr
chrX	5334325	5334326	CanB	24.9	25.4	25.15	chrX_5334326_CanB
chrX	5791075	5791076	CR44832	55.1	57.3	56.2	chrX_5791076_CR44832
chrX	5791080	5791081	CR44832	26.38	27	26.69	chrX_5791081_CR44832
chrX	7032147	7032148	CG12541	20	18.2	19.1	chrX_7032148_CG12541
chrX	7841519	7841520	CG1402	20	17.4	18.7	chrX_7841520_CG1402
chrX	8087804	8087805	Ubc-E2H	23.6	23.2	23.4	chrX_8087805_Ubc-E2H
chrX	8095908	8095909	CG2258	17	17.1	17.05	chrX_8095909_CG2258
chrX	8137721	8137722	Smox	28.6	20.1	24.35	chrX_8137722_Smox
chrX	8154691	8154692	Traf6	15.2	41.9	28.55	chrX_8154692_Traf6
chrX	8155381	8155382	Traf6	15	27.6	21.3	chrX_8155382_Traf6
chrX	8155763	8155764	Traf6	23.1	28.1	25.6	chrX_8155764_Traf6
chrX	8239801	8239802	sdt	22.8	23.4	23.1	chrX_8239802_sdt
chrX	9152808	9152809	His3.3B	27.1	32.2	29.65	chrX_9152809_His3.3B
chrX	9172798	9172799	mei-P26	23	17	20	chrX_9172799_mei-P26
chrX	9622390	9622391	CG42797	56.8	38.1	47.45	chrX_9622391_CG42797

## Sheet: Atx2 ΔLsm-AD
chr	start	end	CG	Replicate 1 edit percentage	Replicate 2 edit percentage	Average edit percentage	chr_coord
chr2L	1009440	1009441	IA-2	27	28.7	27.85	chr2L_1009441_IA-2
chr2L	1011482	1011483	IA-2	21	23.5	22.25	chr2L_1011483_IA-2
chr2L	10374569	10374570	CG33303	17.3	16.7	17	chr2L_10374570_CG33303
chr2L	1140698	1140699	CG4577	20.4	29.7	25.05	chr2L_1140699_CG4577
chr2L	16685809	16685810	grp	15	20	17.5	chr2L_16685810_grp
chr2L	17188307	17188308	beat-IIIc	21.9	28.6	25.25	chr2L_17188308_beat-IIIc
chr2L	20056018	20056019	sNPF	32.9	49	40.95	chr2L_20056019_sNPF
chr2L	297368	297369	Hop	15	22.7	18.85	chr2L_297369_Hop
chr2L	8686710	8686711	Trs23	15.4	17.2	16.3	chr2L_8686711_Trs23
chr2L	9292530	9292531	Ggamma30A	19.2	19.7	19.45	chr2L_9292531_Ggamma30A
chr2L	9292829	9292830	Ggamma30A	24.55	29.1	26.83	chr2L_9292830_Ggamma30A
chr2R	10541456	10541457	lola	19.1	24.3	21.7	chr2R_10541457_lola
chr2R	12062421	12062422	Drep-3	16.7	16.7	16.7	chr2R_12062422_Drep-3
chr2R	12338753	12338754	Den1	36.6	58.1	47.35	chr2R_12338754_Den1
chr2R	12425282	12425283	CG8520	20.8	17.2	19	chr2R_12425283_CG8520
chr2R	12517404	12517405	CG8818	15.6	18.8	17.2	chr2R_12517405_CG8818
chr2R	13513577	13513578	Vmat	55.3	68.1	61.7	chr2R_13513578_Vmat
chr2R	13513732	13513733	Vmat	20.75	23.85	22.3	chr2R_13513733_Vmat
chr2R	13513762	13513763	Vmat	37.3	45.95	41.62	chr2R_13513763_Vmat
chr2R	13514350	13514351	Vmat	28.5	37.2	32.85	chr2R_13514351_Vmat
chr2R	13842873	13842874	Syngr	16.2	25.8	21	chr2R_13842874_Syngr
chr2R	14059308	14059309	mam	18.5	17.4	17.95	chr2R_14059309_mam
chr2R	14427738	14427739	phyl	16.7	29.5	23.1	chr2R_14427739_phyl
chr2R	15385929	15385930	SRPK	15.9	20	17.95	chr2R_15385930_SRPK
chr2R	15932449	15932450	Iap2	37.9	25.5	31.7	chr2R_15932450_Iap2
chr2R	16650269	16650270	gprs	18.8	22.4	20.6	chr2R_16650270_gprs
chr2R	16943374	16943375	Pkc53E	21.4	16.9	19.15	chr2R_16943375_Pkc53E
chr2R	16995053	16995054	Cbp53E	18.5	19.2	18.85	chr2R_16995054_Cbp53E
chr2R	17375700	17375701	mbl	18.5	20	19.25	chr2R_17375701_mbl
chr2R	17442329	17442330	CG18467	25.5	15	20.25	chr2R_17442330_CG18467
chr2R	18278779	18278780	sbb	19.2	16.7	17.95	chr2R_18278780_sbb
chr2R	21620197	21620198	PTP-ER	15	17	16	chr2R_21620198_PTP-ER
chr2R	21692243	21692244	CG42496	15.2	23.5	19.35	chr2R_21692244_CG42496
chr2R	21692243	21692244	Ppcdc	15.2	23.5	19.35	chr2R_21692244_Ppcdc
chr2R	23690701	23690702	Pal2	30.3	31	30.65	chr2R_23690702_Pal2
chr2R	24880256	24880257	CG44247	18.6	24.8	21.7	chr2R_24880257_CG44247
chr2R	25039561	25039562	Nplp1	17.35	17.2	17.27	chr2R_25039562_Nplp1
chr2R	4816391	4816392	CG17528	55.9	61.3	58.6	chr2R_4816392_CG17528
chr2R	6011934	6011935	Src42A	17.9	26.3	22.1	chr2R_6011935_Src42A
chr2R	6920815	6920816	CG30158	52.88	57.6	55.24	chr2R_6920816_CG30158
chr2R	6921435	6921436	CG30158	18.8	46.7	32.75	chr2R_6921436_CG30158
chr2R	6921976	6921977	CG30158	52.1	59.2	55.65	chr2R_6921977_CG30158
chr2R	7562285	7562286	Corin	16.2	18.8	17.5	chr2R_7562286_Corin
chr2R	7718070	7718071	CG18812	15.7	15.3	15.5	chr2R_7718071_CG18812
chr2R	8137322	8137323	Lpin	27.4	48.1	37.75	chr2R_8137323_Lpin
chr2R	9480019	9480020	Camta	24.6	40.4	32.5	chr2R_9480020_Camta
chr3L	10573673	10573674	A2bp1	15.6	17.1	16.35	chr3L_10573674_A2bp1
chr3L	10885037	10885038	CG6404	21.4	25	23.2	chr3L_10885038_CG6404
chr3L	10885046	10885047	CG6404	19.4	24	21.7	chr3L_10885047_CG6404
chr3L	11498209	11498210	chrb	25	30.45	27.73	chr3L_11498210_chrb
chr3L	11689959	11689960	Pallidin	20	46.2	33.1	chr3L_11689960_Pallidin
chr3L	1190747	1190748	Trh	21.7	18.8	20.25	chr3L_1190748_Trh
chr3L	16576650	16576651	mbf1	18.32	19.23	18.77	chr3L_16576651_mbf1
chr3L	1662323	1662324	CG7971	20.8	19	19.9	chr3L_1662324_CG7971
chr3L	16787702	16787703	CG9674	19.57	25.35	22.46	chr3L_16787703_CG9674
chr3L	17345219	17345220	Mip	34.65	34.2	34.42	chr3L_17345220_Mip
chr3L	17345229	17345230	Mip	23.85	23.07	23.46	chr3L_17345230_Mip
chr3L	17345290	17345291	Mip	33.3	28.1	30.7	chr3L_17345291_Mip
chr3L	1773263	1773264	CG13933	27.9	40	33.95	chr3L_1773264_CG13933
chr3L	17748777	17748778	Ccn	36.2	25.6	30.9	chr3L_17748778_Ccn
chr3L	1873826	1873827	dre4	20.7	16.7	18.7	chr3L_1873827_dre4
chr3L	19095223	19095224	CG11577	16.4	28.6	22.5	chr3L_19095224_CG11577
chr3L	21494821	21494822	Hr78	32	21.9	26.95	chr3L_21494822_Hr78
chr3L	21532902	21532903	Mkrn1	20.9	18.2	19.55	chr3L_21532903_Mkrn1
chr3L	21628052	21628053	CG11306	20.4	15.9	18.15	chr3L_21628053_CG11306
chr3L	23747549	23747550	CG17698	18.85	27	22.93	chr3L_23747550_CG17698
chr3L	2769794	2769795	CG9977	16.3	16.3	16.3	chr3L_2769795_CG9977
chr3L	2773175	2773176	CG12093	43.1	21.7	32.4	chr3L_2773176_CG12093
chr3L	2773217	2773218	CG12093	26.1	18.5	22.3	chr3L_2773218_CG12093
chr3L	2792703	2792704	CG43444	16.7	17.1	16.9	chr3L_2792704_CG43444
chr3L	2793765	2793766	CG43444	22	18.5	20.25	chr3L_2793766_CG43444
chr3L	2794332	2794333	CG43444	21.2	25	23.1	chr3L_2794333_CG43444
chr3L	3813706	3813707	CG12006	37.1	65.5	51.3	chr3L_3813707_CG12006
chr3L	3954338	3954339	CG12605	40.6	36.8	38.7	chr3L_3954339_CG12605
chr3L	3954933	3954934	CG12605	52.9	33.48	43.19	chr3L_3954934_CG12605
chr3L	4126782	4126783	ens	15.57	22.9	19.23	chr3L_4126783_ens
chr3L	4127119	4127120	ens	18.45	21.93	20.19	chr3L_4127120_ens
chr3L	4141931	4141932	Akh	45.5	19.6	32.55	chr3L_4141932_Akh
chr3L	4141940	4141941	Akh	34.8	33	33.9	chr3L_4141941_Akh
chr3L	4182458	4182459	Teh2	18.3	24.7	21.5	chr3L_4182459_Teh2
chr3L	4183511	4183512	Teh2	18.95	20.88	19.91	chr3L_4183512_Teh2
chr3L	4183511	4183512	Teh3	18.95	20.88	19.91	chr3L_4183512_Teh3
chr3L	4184048	4184049	Teh2	17.35	18.98	18.16	chr3L_4184049_Teh2
chr3L	4184048	4184049	Teh3	17.35	18.98	18.16	chr3L_4184049_Teh3
chr3L	4184525	4184526	CG18675	21.1	26.2	23.65	chr3L_4184526_CG18675
chr3L	4196184	4196185	CG43367	19.2	18.8	19	chr3L_4196185_CG43367
chr3L	4251839	4251840	ago	22.6	22.2	22.4	chr3L_4251840_ago
chr3L	4937827	4937828	Con	22.3	22.1	22.2	chr3L_4937828_Con
chr3L	4956722	4956723	Con	24.15	29.68	26.91	chr3L_4956723_Con
chr3L	577417	577418	hipk	20	25.38	22.69	chr3L_577418_hipk
chr3L	580103	580104	hipk	23.8	25	24.4	chr3L_580104_hipk
chr3L	5811703	5811704	CG5537	17.1	18.2	17.65	chr3L_5811704_CG5537
chr3L	599854	599855	CG13893	15.2	19.2	17.2	chr3L_599855_CG13893
chr3L	7052849	7052850	Mp	21.85	35.58	28.71	chr3L_7052850_Mp
chr3L	7060195	7060196	CG8641	24.4	33.3	28.85	chr3L_7060196_CG8641
chr3L	7326677	7326678	CG8602	17.42	19.88	18.65	chr3L_7326678_CG8602
chr3L	8281656	8281657	Dscam4	25.5	30.6	28.05	chr3L_8281657_Dscam4
chr3L	8432694	8432695	Unr	30.82	24.07	27.45	chr3L_8432695_Unr
chr3L	8970787	8970788	CG5026	18.8	41.7	30.25	chr3L_8970788_CG5026
chr3L	8972938	8972939	pix	16.3	22.5	19.4	chr3L_8972939_pix
chr3L	8973570	8973571	pix	18.75	20.3	19.52	chr3L_8973571_pix
chr3L	8993382	8993383	smg	18.2	22.2	20.2	chr3L_8993383_smg
chr3L	9074752	9074753	Tequila	34	35.7	34.85	chr3L_9074753_Tequila
chr3L	9098881	9098882	bol	21.25	33.85	27.55	chr3L_9098882_bol
chr3L	9103274	9103275	bol	17.9	18	17.95	chr3L_9103275_bol
chr3L	9103318	9103319	bol	20.6	24.7	22.65	chr3L_9103319_bol
chr3L	9141113	9141114	nwk	16.3	20.85	18.58	chr3L_9141114_nwk
chr3L	9370774	9370775	Fdxh	17.9	30.8	24.35	chr3L_9370775_Fdxh
chr3L	9449475	9449476	CG3529	24.5	15.8	20.15	chr3L_9449476_CG3529
chr3L	9462252	9462253	CG44838	25.9	38.5	32.2	chr3L_9462253_CG44838
chr3L	9480708	9480709	Jarid2	15.9	21.4	18.65	chr3L_9480709_Jarid2
chr3L	9786182	9786183	CG8177	22.5	20.9	21.7	chr3L_9786183_CG8177
chr3L	9894180	9894181	CG14164	26	27.8	26.9	chr3L_9894181_CG14164
chr3L	9894180	9894181	CG6709	26	27.8	26.9	chr3L_9894181_CG6709
chr3L	9894876	9894877	CG6707	26.1	30.2	28.15	chr3L_9894877_CG6707
chr3L	9896304	9896305	CG6707	24.45	19.5	21.98	chr3L_9896305_CG6707
chr3L	9945905	9945906	CG34356	15.4	16	15.7	chr3L_9945906_CG34356
chr3L	9955778	9955779	CG34356	23.3	32.4	27.85	chr3L_9955779_CG34356
chr3R	11048321	11048322	CG34114	16.7	16.3	16.5	chr3R_11048322_CG34114
chr3R	12512093	12512094	Octbeta3R	25.9	20.7	23.3	chr3R_12512094_Octbeta3R
chr3R	12512094	12512095	Octbeta3R	16.4	20.7	18.55	chr3R_12512095_Octbeta3R
chr3R	12629867	12629868	Snx3	17.3	26.2	21.75	chr3R_12629868_Snx3
chr3R	12746230	12746231	beat-Vc	38.42	41.48	39.95	chr3R_12746231_beat-Vc
chr3R	13224637	13224638	Ace	17.7	22.4	20.05	chr3R_13224638_Ace
chr3R	13227870	13227871	Ace	19.2	28.2	23.7	chr3R_13227871_Ace
chr3R	13227970	13227971	Ace	31.53	35.98	33.75	chr3R_13227971_Ace
chr3R	14421335	14421336	natalisin	18.2	19.4	18.8	chr3R_14421336_natalisin
chr3R	14421740	14421741	natalisin	18.2	17.2	17.7	chr3R_14421741_natalisin
chr3R	15326149	15326150	CG6236	18.62	29.23	23.93	chr3R_15326150_CG6236
chr3R	16611235	16611236	NPF	22.7	20.5	21.6	chr3R_16611236_NPF
chr3R	16611267	16611268	NPF	67.88	55.67	61.77	chr3R_16611268_NPF
chr3R	16611317	16611318	NPF	52	43.1	47.55	chr3R_16611318_NPF
chr3R	18249735	18249736	14-3-3epsilon	20.05	30.95	25.5	chr3R_18249736_14-3-3epsilon
chr3R	18716115	18716116	Cha	18.8	26.3	22.55	chr3R_18716116_Cha
chr3R	18716115	18716116	VAChT	18.8	26.3	22.55	chr3R_18716116_VAChT
chr3R	18730760	18730761	Cha	24.5	22.02	23.26	chr3R_18730761_Cha
chr3R	19155252	19155253	CG11779	17.9	16.7	17.3	chr3R_19155253_CG11779
chr3R	19458496	19458497	CG31221	16.95	19.1	18.02	chr3R_19458497_CG31221
chr3R	19929633	19929634	Hs6st	15.8	35	25.4	chr3R_19929634_Hs6st
chr3R	20323557	20323558	CG42668	24.1	25	24.55	chr3R_20323558_CG42668
chr3R	20783186	20783187	Syp	33.9	19.2	26.55	chr3R_20783187_Syp
chr3R	20783415	20783416	Syp	18.9	23.1	21	chr3R_20783416_Syp
chr3R	20797469	20797470	Syp	24.1	20.4	22.25	chr3R_20797470_Syp
chr3R	20820785	20820786	CG17271	35.25	20	27.62	chr3R_20820786_CG17271
chr3R	20862212	20862213	CG3822	26.1	22	24.05	chr3R_20862213_CG3822
chr3R	20862541	20862542	CG3822	24.4	15.9	20.15	chr3R_20862542_CG3822
chr3R	20863402	20863403	CG3822	25.95	17.1	21.52	chr3R_20863403_CG3822
chr3R	20971205	20971206	Atpalpha	24.02	19.8	21.91	chr3R_20971206_Atpalpha
chr3R	20992668	20992669	Calx	21.4	18.6	20	chr3R_20992669_Calx
chr3R	20993292	20993293	Calx	37	17.9	27.45	chr3R_20993293_Calx
chr3R	21019630	21019631	Rlip	30	17.5	23.75	chr3R_21019631_Rlip
chr3R	21020516	21020517	Rlip	35.1	16.4	25.75	chr3R_21020517_Rlip
chr3R	21062579	21062580	Cortactin	15.6	16.2	15.9	chr3R_21062580_Cortactin
chr3R	21062746	21062747	Cortactin	25	26.1	25.55	chr3R_21062747_Cortactin
chr3R	21372655	21372656	mod(mdg4)	27.5	17.4	22.45	chr3R_21372656_mod(mdg4)
chr3R	21527750	21527751	CG7956	31.7	15.6	23.65	chr3R_21527751_CG7956
chr3R	21771020	21771021	GABA-B-R2	26.17	15.88	21.03	chr3R_21771021_GABA-B-R2
chr3R	21771771	21771772	GABA-B-R2	26.9	15.9	21.4	chr3R_21771772_GABA-B-R2
chr3R	21785536	21785537	CASK	20.8	33.3	27.05	chr3R_21785537_CASK
chr3R	21785536	21785537	CRG	20.8	33.3	27.05	chr3R_21785537_CRG
chr3R	21786127	21786128	CASK	19.3	30.1	24.7	chr3R_21786128_CASK
chr3R	21786127	21786128	CRG	19.3	30.1	24.7	chr3R_21786128_CRG
chr3R	21788506	21788507	CASK	21.4	35.4	28.4	chr3R_21788507_CASK
chr3R	22517640	22517641	Octbeta1R	21.5	27.5	24.5	chr3R_22517641_Octbeta1R
chr3R	23692990	23692991	CG10254	18.9	23.1	21	chr3R_23692991_CG10254
chr3R	23698883	23698884	prt	17.4	31.8	24.6	chr3R_23698884_prt
chr3R	23816158	23816159	CG33111	15.2	23.1	19.15	chr3R_23816159_CG33111
chr3R	23816158	23816159	eIF4G2	15.2	23.1	19.15	chr3R_23816159_eIF4G2
chr3R	24343481	24343482	Ms	28.9	26.6	27.75	chr3R_24343482_Ms
chr3R	24343590	24343591	Ms	37.7	35.8	36.75	chr3R_24343591_Ms
chr3R	24343597	24343598	Ms	38.7	34.1	36.4	chr3R_24343598_Ms
chr3R	28050111	28050112	CG34362	20.3	19.6	19.95	chr3R_28050112_CG34362
chr3R	28088797	28088798	CG34362	15.2	16	15.6	chr3R_28088798_CG34362
chr3R	28604876	28604877	Hrb98DE	16.1	29	22.55	chr3R_28604877_Hrb98DE
chr3R	29486937	29486938	Ptp99A	17.7	15.5	16.6	chr3R_29486938_Ptp99A
chr3R	29659085	29659086	Dop1R2	20	22.2	21.1	chr3R_29659086_Dop1R2
chr3R	29674515	29674516	Bub3	36.6	57.1	46.85	chr3R_29674516_Bub3
chr3R	29913008	29913009	Capa	15.2	19.7	17.45	chr3R_29913009_Capa
chr3R	30004028	30004029	CG7911	16.1	15.9	16	chr3R_30004029_CG7911
chr3R	30016019	30016020	Mgat2	18	16.2	17.1	chr3R_30016020_Mgat2
chr3R	30116225	30116226	sima	43.5	23.1	33.3	chr3R_30116226_sima
chr3R	31457698	31457699	Gprk2	37.5	15.1	26.3	chr3R_31457699_Gprk2
chr3R	4389531	4389532	tub	15.3	22.2	18.75	chr3R_4389532_tub
chr3R	5595125	5595126	Vha26	16.1	17.9	17	chr3R_5595126_Vha26
chr3R	5634251	5634252	CG12171	28.9	19	23.95	chr3R_5634252_CG12171
chr3R	5811503	5811504	CG11000	31.1	22.2	26.65	chr3R_5811504_CG11000
chr3R	5811505	5811506	CG11000	22.2	29.4	25.8	chr3R_5811506_CG11000
chr3R	7064752	7064753	CG1105	16.2	25	20.6	chr3R_7064753_CG1105
chr3R	7065064	7065065	CG1105	25	38.1	31.55	chr3R_7065065_CG1105
chr3R	7072211	7072212	CG1104	16.2	24.4	20.3	chr3R_7072212_CG1104
chr3R	7077889	7077890	CG1943	15.8	32	23.9	chr3R_7077890_CG1943
chr3R	8018616	8018617	CG2747	19.25	32.85	26.05	chr3R_8018617_CG2747
chr3R	9294676	9294677	CG8861	20.2	20	20.1	chr3R_9294677_CG8861
chr3R	9416762	9416763	alpha-Man-II	32.3	24.1	28.2	chr3R_9416763_alpha-Man-II
chr3R	9441505	9441506	ps	35.65	26.15	30.9	chr3R_9441506_ps
chr3R	9525979	9525980	CG8176	29.4	34	31.7	chr3R_9525980_CG8176
chr3R	9539464	9539465	mura	39.75	19.82	29.79	chr3R_9539465_mura
chr3R	9992706	9992707	Glut4EF	31.6	32.5	32.05	chr3R_9992707_Glut4EF
chr4	393929	393930	Lin29	23.5	16.1	19.8	chr4_393930_Lin29
chrX	10329252	10329253	Gip	18.15	35.05	26.6	chrX_10329253_Gip
chrX	10873988	10873989	CG1637	29.3	30.8	30.05	chrX_10873989_CG1637
chrX	10967983	10967984	CG42339	30.4	34.5	32.45	chrX_10967984_CG42339
chrX	12331302	12331303	Ten-a	42.4	20.8	31.6	chrX_12331303_Ten-a
chrX	12946535	12946536	fne	21.35	20.25	20.8	chrX_12946536_fne
chrX	13999224	13999225	ben	16.1	25.5	20.8	chrX_13999225_ben
chrX	15189234	15189235	CG43737	16.5	18.1	17.3	chrX_15189235_CG43737
chrX	15464337	15464338	CG6294	15.2	20.8	18	chrX_15464338_CG6294
chrX	15464337	15464338	CG6299	15.2	20.8	18	chrX_15464338_CG6299
chrX	15978235	15978236	CG9170	19.8	22.7	21.25	chrX_15978236_CG9170
chrX	17639803	17639804	RhoGAPp190	22.3	28.7	25.5	chrX_17639804_RhoGAPp190
chrX	18026710	18026711	CG6867	20.18	29.52	24.85	chrX_18026711_CG6867
chrX	18028094	18028095	CG6867	18.8	24.1	21.45	chrX_18028095_CG6867
chrX	18323840	18323841	CG6123	17	21.1	19.05	chrX_18323841_CG6123
chrX	19599039	19599040	RpS10b	21.1	15.3	18.2	chrX_19599040_RpS10b
chrX	2062681	2062682	CG4281	15.6	32	23.8	chrX_2062682_CG4281
chrX	2066778	2066779	CG4199	31.3	27.6	29.45	chrX_2066779_CG4199
chrX	2093422	2093423	Unc-76	15.7	22.7	19.2	chrX_2093423_Unc-76
chrX	23081708	23081709	CG17163	16.7	17	16.85	chrX_23081709_CG17163
chrX	3321068	3321069	dnc	16.1	23.4	19.75	chrX_3321069_dnc
chrX	3342369	3342370	dnc	25	21.6	23.3	chrX_3342370_dnc
chrX	3892350	3892351	CG42541	15.8	22.2	19	chrX_3892351_CG42541
chrX	503511	503512	svr	35.9	42.2	39.05	chrX_503512_svr
chrX	5791075	5791076	CR44832	48.7	62	55.35	chrX_5791076_CR44832
chrX	5791080	5791081	CR44832	18.12	19.55	18.84	chrX_5791081_CR44832
chrX	7032147	7032148	CG12541	19.2	24.3	21.75	chrX_7032148_CG12541
chrX	7841520	7841521	CG1402	21.4	24.1	22.75	chrX_7841521_CG1402
chrX	8025899	8025900	Tbh	20.9	19.5	20.2	chrX_8025900_Tbh
chrX	8027245	8027246	Tbh	20.7	17.9	19.3	chrX_8027246_Tbh
chrX	9152808	9152809	His3.3B	17.1	25.3	21.2	chrX_9152809_His3.3B
chrX	9172798	9172799	mei-P26	16.4	18.1	17.25	chrX_9172799_mei-P26
chrX	9622390	9622391	CG42797	22.7	18.8	20.75	chrX_9622391_CG42797

## Sheet: Atx2 ΔmIDR
chr	start	end	CG	Replicate 1 edit percentage	Replicate 2 edit percentage	Average edit percentage	chr_coord
chr2L	1009440	1009441	IA-2	28.8	20.2	24.5	chr2L_1009441_IA-2
chr2L	1011482	1011483	IA-2	25.9	19.5	22.7	chr2L_1011483_IA-2
chr2L	17188307	17188308	beat-IIIc	28.2	21	24.6	chr2L_17188308_beat-IIIc
chr2L	20055344	20055345	sNPF	23.1	23.3	23.2	chr2L_20055345_sNPF
chr2L	20056018	20056019	sNPF	45	28	36.5	chr2L_20056019_sNPF
chr2L	8116005	8116006	Bsg	16.2	15.1	15.65	chr2L_8116006_Bsg
chr2L	9292829	9292830	Ggamma30A	26.9	18.75	22.82	chr2L_9292830_Ggamma30A
chr2R	12338753	12338754	Den1	34.6	21.2	27.9	chr2R_12338754_Den1
chr2R	12517404	12517405	CG8818	19.2	16.7	17.95	chr2R_12517405_CG8818
chr2R	13513577	13513578	Vmat	58.1	30.3	44.2	chr2R_13513578_Vmat
chr2R	13513762	13513763	Vmat	45.9	28	36.95	chr2R_13513763_Vmat
chr2R	13514350	13514351	Vmat	43.9	24	33.95	chr2R_13514351_Vmat
chr2R	14427738	14427739	phyl	24.3	15.6	19.95	chr2R_14427739_phyl
chr2R	15199906	15199907	GPHR	58.8	15.4	37.1	chr2R_15199907_GPHR
chr2R	15932449	15932450	Iap2	38.9	24.5	31.7	chr2R_15932450_Iap2
chr2R	16029936	16029937	CG8401	23.3	17	20.15	chr2R_16029937_CG8401
chr2R	16558812	16558813	DAT	39.6	18.4	29	chr2R_16558813_DAT
chr2R	16650269	16650270	gprs	19.5	20.5	20	chr2R_16650270_gprs
chr2R	16995053	16995054	Cbp53E	39.4	27	33.2	chr2R_16995054_Cbp53E
chr2R	16995078	16995079	Cbp53E	30.88	19.4	25.14	chr2R_16995079_Cbp53E
chr2R	17442329	17442330	CG18467	16	16.7	16.35	chr2R_17442330_CG18467
chr2R	21620197	21620198	PTP-ER	15.8	15	15.4	chr2R_21620198_PTP-ER
chr2R	23690701	23690702	Pal2	29	23.3	26.15	chr2R_23690702_Pal2
chr2R	24404821	24404822	SerT	15.4	17.5	16.45	chr2R_24404822_SerT
chr2R	24880256	24880257	CG44247	31.8	15.1	23.45	chr2R_24880257_CG44247
chr2R	24965494	24965495	CG30424	21.7	19.4	20.55	chr2R_24965495_CG30424
chr2R	25039561	25039562	Nplp1	20.27	21.3	20.79	chr2R_25039562_Nplp1
chr2R	6920815	6920816	CG30158	46.98	32.52	39.75	chr2R_6920816_CG30158
chr2R	6921435	6921436	CG30158	46.2	29.3	37.75	chr2R_6921436_CG30158
chr2R	6921976	6921977	CG30158	52.6	41.9	47.25	chr2R_6921977_CG30158
chr2R	8009125	8009126	CG14762	19	17.2	18.1	chr2R_8009126_CG14762
chr2R	8137317	8137318	Lpin	22	15	18.5	chr2R_8137318_Lpin
chr2R	8137322	8137323	Lpin	44.8	21.4	33.1	chr2R_8137323_Lpin
chr2R	926167	926168	CG40498	40.2	22.9	31.55	chr2R_926168_CG40498
chr2R	9910327	9910328	FMRFa	41.7	18	29.85	chr2R_9910328_FMRFa
chr2R	9910328	9910329	FMRFa	62.2	18.4	40.3	chr2R_9910329_FMRFa
chr3L	10223027	10223028	scramb1	30.8	25	27.9	chr3L_10223028_scramb1
chr3L	10568262	10568263	A2bp1	22.4	18.62	20.51	chr3L_10568263_A2bp1
chr3L	10573673	10573674	A2bp1	23.2	17	20.1	chr3L_10573674_A2bp1
chr3L	11498209	11498210	chrb	34.15	21.52	27.84	chr3L_11498210_chrb
chr3L	11689959	11689960	Pallidin	29.8	36.8	33.3	chr3L_11689960_Pallidin
chr3L	11734470	11734471	CG6024	26.68	26.85	26.77	chr3L_11734471_CG6024
chr3L	11797296	11797297	Klp68D	17.5	15.2	16.35	chr3L_11797297_Klp68D
chr3L	1190747	1190748	Trh	29.4	18.8	24.1	chr3L_1190748_Trh
chr3L	11993873	11993874	Grip163	20	18.5	19.25	chr3L_11993874_Grip163
chr3L	12742951	12742952	CG32112	18.5	17.5	18	chr3L_12742952_CG32112
chr3L	1340177	1340178	CG2199	34.6	22.6	28.6	chr3L_1340178_CG2199
chr3L	1523299	1523300	Psa	18.2	16.3	17.25	chr3L_1523300_Psa
chr3L	1525047	1525048	CG12090	28.9	21.2	25.05	chr3L_1525048_CG12090
chr3L	15831129	15831130	dbo	20.8	21.5	21.15	chr3L_15831130_dbo
chr3L	1623513	1623514	GC	18.62	25.35	21.98	chr3L_1623514_GC
chr3L	16371176	16371177	roq	19.6	17.6	18.6	chr3L_16371177_roq
chr3L	1652462	1652463	CG7967	25	41.7	33.35	chr3L_1652463_CG7967
chr3L	1652567	1652568	CG7967	39.1	58.8	48.95	chr3L_1652568_CG7967
chr3L	16576650	16576651	mbf1	29.2	17.8	23.5	chr3L_16576651_mbf1
chr3L	17345219	17345220	Mip	56.1	22.75	39.42	chr3L_17345220_Mip
chr3L	17345290	17345291	Mip	41.2	18.9	30.05	chr3L_17345291_Mip
chr3L	1773263	1773264	CG13933	33.3	40	36.65	chr3L_1773264_CG13933
chr3L	17748777	17748778	Ccn	31.9	21.9	26.9	chr3L_17748778_Ccn
chr3L	19066983	19066984	Mkp3	16	18.8	17.4	chr3L_19066984_Mkp3
chr3L	20098493	20098494	CG14186	31.7	17.5	24.6	chr3L_20098494_CG14186
chr3L	20098661	20098662	CG14186	19.6	15.1	17.35	chr3L_20098662_CG14186
chr3L	20352403	20352404	eRF1	18.2	15.6	16.9	chr3L_20352404_eRF1
chr3L	21628052	21628053	CG11306	15.1	17.6	16.35	chr3L_21628053_CG11306
chr3L	23093359	23093360	RpL10	28.8	22	25.4	chr3L_23093360_RpL10
chr3L	23148124	23148125	CG32350	19	25.7	22.35	chr3L_23148125_CG32350
chr3L	23934990	23934991	CG40470	20	30.35	25.18	chr3L_23934991_CG40470
chr3L	2603618	2603619	Pxn	52.8	35	43.9	chr3L_2603619_Pxn
chr3L	2640503	2640504	CG42245	32.4	20.5	26.45	chr3L_2640504_CG42245
chr3L	2640503	2640504	MEP-1	32.4	20.5	26.45	chr3L_2640504_MEP-1
chr3L	2769794	2769795	CG9977	27.3	34.8	31.05	chr3L_2769795_CG9977
chr3L	2773175	2773176	CG12093	32.4	43.6	38	chr3L_2773176_CG12093
chr3L	2773217	2773218	CG12093	29.6	39.4	34.5	chr3L_2773218_CG12093
chr3L	2788119	2788120	CG43444	23.8	19	21.4	chr3L_2788120_CG43444
chr3L	3813706	3813707	CG12006	41.3	22.9	32.1	chr3L_3813707_CG12006
chr3L	3946169	3946170	CG14982	17.9	15.4	16.65	chr3L_3946170_CG14982
chr3L	3954338	3954339	CG12605	48.6	34.8	41.7	chr3L_3954339_CG12605
chr3L	3954933	3954934	CG12605	45.55	36.2	40.88	chr3L_3954934_CG12605
chr3L	4037801	4037802	CG11593	25.85	15.97	20.91	chr3L_4037802_CG11593
chr3L	4141910	4141911	Akh	46.65	33.55	40.1	chr3L_4141911_Akh
chr3L	4141931	4141932	Akh	26.1	20.8	23.45	chr3L_4141932_Akh
chr3L	4141940	4141941	Akh	39.9	27.3	33.6	chr3L_4141941_Akh
chr3L	4142008	4142009	Akh	26.1	17.6	21.85	chr3L_4142009_Akh
chr3L	4142019	4142020	Akh	92.2	74.3	83.25	chr3L_4142020_Akh
chr3L	580103	580104	hipk	32.3	20.2	26.25	chr3L_580104_hipk
chr3L	6025599	6025600	PVRAP	44.1	17.3	30.7	chr3L_6025600_PVRAP
chr3L	6167466	6167467	CG10289	33.3	18.8	26.05	chr3L_6167467_CG10289
chr3L	6713711	6713712	ple	16	18.2	17.1	chr3L_6713712_ple
chr3L	7052849	7052850	Mp	34.62	20	27.31	chr3L_7052850_Mp
chr3L	7059402	7059403	CG8641	18.4	17.2	17.8	chr3L_7059403_CG8641
chr3L	7241051	7241052	RpL18	16.7	16.7	16.7	chr3L_7241052_RpL18
chr3L	8281656	8281657	Dscam4	28.4	22.1	25.25	chr3L_8281657_Dscam4
chr3L	8432694	8432695	Unr	36.27	28.6	32.44	chr3L_8432695_Unr
chr3L	9103274	9103275	bol	26.5	25.3	25.9	chr3L_9103275_bol
chr3L	9594059	9594060	CG42673	21.1	15.4	18.25	chr3L_9594060_CG42673
chr3L	9971272	9971273	CG6674	31.93	20.5	26.21	chr3L_9971273_CG6674
chr3R	12459396	12459397	CG5961	19.1	15.4	17.25	chr3R_12459397_CG5961
chr3R	12512093	12512094	Octbeta3R	20.8	15	17.9	chr3R_12512094_Octbeta3R
chr3R	12512613	12512614	Octbeta3R	18.77	29.62	24.2	chr3R_12512614_Octbeta3R
chr3R	12746230	12746231	beat-Vc	34.42	35.85	35.14	chr3R_12746231_beat-Vc
chr3R	13224637	13224638	Ace	23.4	15.8	19.6	chr3R_13224638_Ace
chr3R	13227870	13227871	Ace	19	16.4	17.7	chr3R_13227871_Ace
chr3R	13227970	13227971	Ace	33.4	30.62	32.01	chr3R_13227971_Ace
chr3R	14330745	14330746	NK7.1	23.5	19.1	21.3	chr3R_14330746_NK7.1
chr3R	14421335	14421336	natalisin	29.3	17.1	23.2	chr3R_14421336_natalisin
chr3R	14421539	14421540	natalisin	16.1	15.2	15.65	chr3R_14421540_natalisin
chr3R	14660839	14660840	Hexim	27.3	15.2	21.25	chr3R_14660840_Hexim
chr3R	14746335	14746336	jvl	33.3	18.3	25.8	chr3R_14746336_jvl
chr3R	14746546	14746547	smp-30	34.8	25.5	30.15	chr3R_14746547_smp-30
chr3R	14747107	14747108	smp-30	29.2	20	24.6	chr3R_14747108_smp-30
chr3R	16611235	16611236	NPF	29.7	15.3	22.5	chr3R_16611236_NPF
chr3R	16611267	16611268	NPF	66.17	41.8	53.98	chr3R_16611268_NPF
chr3R	16611317	16611318	NPF	60.2	32.3	46.25	chr3R_16611318_NPF
chr3R	18730760	18730761	Cha	22.65	20.98	21.81	chr3R_18730761_Cha
chr3R	19458496	19458497	CG31221	20.85	16.55	18.7	chr3R_19458497_CG31221
chr3R	19643171	19643172	Vha13	16.7	18.2	17.45	chr3R_19643172_Vha13
chr3R	19929633	19929634	Hs6st	22.2	17	19.6	chr3R_19929634_Hs6st
chr3R	20323557	20323558	CG42668	16.7	25.8	21.25	chr3R_20323558_CG42668
chr3R	20783186	20783187	Syp	83.3	53.8	68.55	chr3R_20783187_Syp
chr3R	20783415	20783416	Syp	85	50	67.5	chr3R_20783416_Syp
chr3R	20797469	20797470	Syp	35	19	27	chr3R_20797470_Syp
chr3R	20816915	20816916	CG17270	25.4	20.8	23.1	chr3R_20816916_CG17270
chr3R	20820785	20820786	CG17271	38.4	25.5	31.95	chr3R_20820786_CG17271
chr3R	20971205	20971206	Atpalpha	48.68	39.15	43.91	chr3R_20971206_Atpalpha
chr3R	21019630	21019631	Rlip	34.2	25	29.6	chr3R_21019631_Rlip
chr3R	21020516	21020517	Rlip	28.8	18.5	23.65	chr3R_21020517_Rlip
chr3R	21062746	21062747	Cortactin	30	18.6	24.3	chr3R_21062747_Cortactin
chr3R	21213891	21213892	SNF4Agamma	16.1	17.6	16.85	chr3R_21213892_SNF4Agamma
chr3R	21352944	21352945	mod(mdg4)	20	23.8	21.9	chr3R_21352945_mod(mdg4)
chr3R	21360540	21360541	mod(mdg4)	29.07	21.48	25.27	chr3R_21360541_mod(mdg4)
chr3R	21368960	21368961	pre-mod(mdg4)-U	31.3	25	28.15	chr3R_21368961_pre-mod(mdg4)-U
chr3R	21368960	21368961	pre-mod(mdg4)-V	31.3	25	28.15	chr3R_21368961_pre-mod(mdg4)-V
chr3R	21368960	21368961	pre-mod(mdg4)-X	31.3	25	28.15	chr3R_21368961_pre-mod(mdg4)-X
chr3R	21372655	21372656	mod(mdg4)	27	19.4	23.2	chr3R_21372656_mod(mdg4)
chr3R	21527750	21527751	CG7956	38.9	19.6	29.25	chr3R_21527751_CG7956
chr3R	21771020	21771021	GABA-B-R2	24.75	20.3	22.52	chr3R_21771021_GABA-B-R2
chr3R	21771771	21771772	GABA-B-R2	24.68	17.9	21.29	chr3R_21771772_GABA-B-R2
chr3R	21785536	21785537	CASK	17.4	29.7	23.55	chr3R_21785537_CASK
chr3R	21785536	21785537	CRG	17.4	29.7	23.55	chr3R_21785537_CRG
chr3R	21786127	21786128	CASK	15.7	22.5	19.1	chr3R_21786128_CASK
chr3R	21786127	21786128	CRG	15.7	22.5	19.1	chr3R_21786128_CRG
chr3R	23681818	23681819	eIF-3p66	36.9	20.9	28.9	chr3R_23681819_eIF-3p66
chr3R	23697691	23697692	prt	40	33.3	36.65	chr3R_23697692_prt
chr3R	23732353	23732354	Rpn9	26.6	21	23.8	chr3R_23732354_Rpn9
chr3R	24343481	24343482	Ms	41.8	26.5	34.15	chr3R_24343482_Ms
chr3R	24343590	24343591	Ms	42.95	24.6	33.78	chr3R_24343591_Ms
chr3R	24343597	24343598	Ms	43.4	26.6	35	chr3R_24343598_Ms
chr3R	24664700	24664701	slo	25	22.4	23.7	chr3R_24664701_slo
chr3R	24718450	24718451	CG13630	46.7	25	35.85	chr3R_24718451_CG13630
chr3R	24747898	24747899	tok	28.1	27.62	27.86	chr3R_24747899_tok
chr3R	24760622	24760623	AstA	29.6	17.1	23.35	chr3R_24760623_AstA
chr3R	24820485	24820486	Saf-B	34.1	27.3	30.7	chr3R_24820486_Saf-B
chr3R	24934667	24934668	CG11771	19.2	16.1	17.65	chr3R_24934668_CG11771
chr3R	28050111	28050112	CG34362	17.2	20	18.6	chr3R_28050112_CG34362
chr3R	28086186	28086187	CG34362	37.5	21.8	29.65	chr3R_28086187_CG34362
chr3R	28086941	28086942	CG34362	15.9	16.7	16.3	chr3R_28086942_CG34362
chr3R	28087830	28087831	CG34362	20.1	17.9	19	chr3R_28087831_CG34362
chr3R	28472675	28472676	beat-VI	20.4	16.1	18.25	chr3R_28472676_beat-VI
chr3R	28599050	28599051	Noa36	22.2	17.9	20.05	chr3R_28599051_Noa36
chr3R	28604751	28604752	Hrb98DE	23.98	17.2	20.59	chr3R_28604752_Hrb98DE
chr3R	28817615	28817616	CG1523	25.5	16.4	20.95	chr3R_28817616_CG1523
chr3R	28854139	28854140	spg	77.5	44	60.75	chr3R_28854140_spg
chr3R	29486937	29486938	Ptp99A	20.9	16.7	18.8	chr3R_29486938_Ptp99A
chr3R	29630420	29630421	Dop1R2	23	22.2	22.6	chr3R_29630421_Dop1R2
chr3R	29674515	29674516	Bub3	45	19	32	chr3R_29674516_Bub3
chr3R	31849069	31849070	heph	25.9	17.5	21.7	chr3R_31849070_heph
chr3R	4314519	4314520	Syt14	17.5	16	16.75	chr3R_4314520_Syt14
chr3R	7065064	7065065	CG1105	16.7	20	18.35	chr3R_7065065_CG1105
chr3R	9455947	9455948	GstZ1	17.9	16.1	17	chr3R_9455948_GstZ1
chrX	1014552	1014553	CG11638	19	15.7	17.35	chrX_1014553_CG11638
chrX	10604129	10604130	CG43347	16.7	15.2	15.95	chrX_10604130_CG43347
chrX	10873988	10873989	CG1637	37.3	20	28.65	chrX_10873989_CG1637
chrX	10967983	10967984	CG42339	34.3	23.9	29.1	chrX_10967984_CG42339
chrX	12331302	12331303	Ten-a	51.5	27.3	39.4	chrX_12331303_Ten-a
chrX	12946535	12946536	fne	24.77	22.65	23.71	chrX_12946536_fne
chrX	13287341	13287342	CG15743	19.5	25	22.25	chrX_13287342_CG15743
chrX	13367888	13367889	Syt12	40	25.7	32.85	chrX_13367889_Syt12
chrX	13999224	13999225	ben	27.8	17.2	22.5	chrX_13999225_ben
chrX	14686694	14686695	NetB	44.1	42.3	43.2	chrX_14686695_NetB
chrX	1474762	1474763	Rab27	19.4	15.6	17.5	chrX_1474763_Rab27
chrX	15113676	15113677	Rab3-GEF	21.8	17.7	19.75	chrX_15113677_Rab3-GEF
chrX	15978235	15978236	CG9170	22.5	16.1	19.3	chrX_15978236_CG9170
chrX	17248552	17248553	CG8675	16.2	15.9	16.05	chrX_17248553_CG8675
chrX	17639803	17639804	RhoGAPp190	26.4	19.2	22.8	chrX_17639804_RhoGAPp190
chrX	17847963	17847964	Ucp4A	19.5	15	17.25	chrX_17847964_Ucp4A
chrX	18028094	18028095	CG6867	27.6	18	22.8	chrX_18028095_CG6867
chrX	18828307	18828308	CG42450	16.9	23.3	20.1	chrX_18828308_CG42450
chrX	2062681	2062682	CG4281	31.7	22.5	27.1	chrX_2062682_CG4281
chrX	2093422	2093423	Unc-76	23.9	17.1	20.5	chrX_2093423_Unc-76
chrX	2254793	2254794	CG3078	26	19.1	22.55	chrX_2254794_CG3078
chrX	3321068	3321069	dnc	32.7	15.6	24.15	chrX_3321069_dnc
chrX	3342369	3342370	dnc	36.1	17.8	26.95	chrX_3342370_dnc
chrX	3892350	3892351	CG42541	20.5	15.5	18	chrX_3892351_CG42541
chrX	503511	503512	svr	40.7	26.6	33.65	chrX_503512_svr
chrX	5791075	5791076	CR44832	57.8	36.9	47.35	chrX_5791076_CR44832
chrX	6349414	6349415	CG3446	21.1	18.2	19.65	chrX_6349415_CG3446
chrX	7841519	7841520	CG1402	17.5	22.4	19.95	chrX_7841520_CG1402
chrX	8025899	8025900	Tbh	27.3	22.7	25	chrX_8025900_Tbh
chrX	8027245	8027246	Tbh	20.7	18.5	19.6	chrX_8027246_Tbh
chrX	8403255	8403256	CG10555	34.33	23.7	29.02	chrX_8403256_CG10555
chrX	9152808	9152809	His3.3B	17.7	15.3	16.5	chrX_9152809_His3.3B
chrX	9172798	9172799	mei-P26	21.4	15.2	18.3	chrX_9172799_mei-P26
chrX	9622390	9622391	CG42797	27.5	19	23.25	chrX_9622391_CG42797

## Sheet: Atx2 ΔcIDR
chr	start	end	CG	Replicate 1 edit percentage	Replicate 2 edit percentage	Average edit percentage	chr_coord
chr2L	2877081	2877082	CG8814	18.9	21.3	20.1	chr2L_2877082_CG8814
chr2R	4816391	4816392	CG17528	55.6	58.3	56.95	chr2R_4816392_CG17528
chr3L	11734470	11734471	CG6024	28.38	31.35	29.87	chr3L_11734471_CG6024
chr3L	11794615	11794616	CG10907	35	26.1	30.55	chr3L_11794616_CG10907
chr3L	11797296	11797297	Klp68D	25	37.8	31.4	chr3L_11797297_Klp68D
chr3L	12368829	12368830	Ncc69	67.3	68.68	67.99	chr3L_12368830_Ncc69
chr3L	12474129	12474130	CG10616	43.3	42.6	42.95	chr3L_12474130_CG10616
chr3L	16353135	16353136	CG4933	21.7	30	25.85	chr3L_16353136_CG4933
chr3L	1744012	1744013	Gk	38.75	23.5	31.12	chr3L_1744013_Gk
chr3L	1744768	1744769	Gk	25	16.7	20.85	chr3L_1744769_Gk
chr3L	17748777	17748778	Ccn	20.3	19.6	19.95	chr3L_17748778_Ccn
chr3L	1800695	1800696	Patj	31.8	30	30.9	chr3L_1800696_Patj
chr3L	1884465	1884466	Aprt	30.8	15.2	23	chr3L_1884466_Aprt
chr3L	1894889	1894890	CG1887	39.1	15.2	27.15	chr3L_1894890_CG1887
chr3L	1935026	1935027	CG5687	21.7	16.1	18.9	chr3L_1935027_CG5687
chr3L	1935408	1935409	CG5687	25.6	24.8	25.2	chr3L_1935409_CG5687
chr3L	19601119	19601120	Taf6	15.4	19	17.2	chr3L_19601120_Taf6
chr3L	2263752	2263753	ecd	33.3	16.9	25.1	chr3L_2263753_ecd
chr3L	23093359	23093360	RpL10	19.3	22.2	20.75	chr3L_23093360_RpL10
chr3L	2773175	2773176	CG12093	17.5	23.4	20.45	chr3L_2773176_CG12093
chr3L	2773217	2773218	CG12093	16.1	16.9	16.5	chr3L_2773218_CG12093
chr3L	2773700	2773701	CG12093	20	15.4	17.7	chr3L_2773701_CG12093
chr3L	3145157	3145158	CG1291	16	21.7	18.85	chr3L_3145158_CG1291
chr3L	3146052	3146053	CG12082	25.7	25.5	25.6	chr3L_3146053_CG12082
chr3L	3146682	3146683	CG12082	30	30.4	30.2	chr3L_3146683_CG12082
chr3L	4141910	4141911	Akh	26.75	24.6	25.68	chr3L_4141911_Akh
chr3L	4141931	4141932	Akh	18.2	16.6	17.4	chr3L_4141932_Akh
chr3L	4142008	4142009	Akh	18.6	16.9	17.75	chr3L_4142009_Akh
chr3L	4142019	4142020	Akh	65.2	62.2	63.7	chr3L_4142020_Akh
chr3R	15363551	15363552	CG6171	24.1	16.7	20.4	chr3R_15363552_CG6171
chr3R	15402987	15402988	CG6125	26.1	33.3	29.7	chr3R_15402988_CG6125
chr3R	16611267	16611268	NPF	17.5	17.95	17.73	chr3R_16611268_NPF
chr3R	16645743	16645744	CG10324	51.6	57.7	54.65	chr3R_16645744_CG10324
chr3R	20323557	20323558	CG42668	15.9	15.6	15.75	chr3R_20323558_CG42668
chr3R	21632283	21632284	E2f	21.4	22.7	22.05	chr3R_21632284_E2f
chr3R	21785536	21785537	CASK	28.5	29.9	29.2	chr3R_21785537_CASK
chr3R	21785536	21785537	CRG	28.5	29.9	29.2	chr3R_21785537_CRG
chr3R	21786127	21786128	CASK	24.3	22.6	23.45	chr3R_21786128_CASK
chr3R	21786127	21786128	CRG	24.3	22.6	23.45	chr3R_21786128_CRG
chr3R	22764850	22764851	CG7029	59.7	15.8	37.75	chr3R_22764851_CG7029
chr3R	22764850	22764851	Usp12-46	59.7	15.8	37.75	chr3R_22764851_Usp12-46
chr3R	29630386	29630387	Dop1R2	15	15	15	chr3R_29630387_Dop1R2
chr3R	29674515	29674516	Bub3	15	30.8	22.9	chr3R_29674516_Bub3
chr3R	8813605	8813606	CG9821	16.5	18.4	17.45	chr3R_8813606_CG9821
chr3R	9416762	9416763	alpha-Man-II	45.5	38.6	42.05	chr3R_9416763_alpha-Man-II
chr3R	9441505	9441506	ps	43.38	45.62	44.5	chr3R_9441506_ps
chr3R	9525979	9525980	CG8176	28	33.8	30.9	chr3R_9525980_CG8176
chr3R	9992706	9992707	Glut4EF	56.5	42.4	49.45	chr3R_9992707_Glut4EF
chrX	18026710	18026711	CG6867	20	21.52	20.76	chrX_18026711_CG6867
chrX	18828307	18828308	CG42450	18.4	20	19.2	chrX_18828308_CG42450

## Sheet: Atx2 Only Lsm Lsm-AD
chr	start	end	CG	Replicate 1 edit percentage	Replicate 2 edit percentage	Average edit percentage	chr_coord
chr2L	7995909	7995910	CG7227	29.1	18.2	23.65	chr2L_7995910_CG7227
chr3L	10568262	10568263	A2bp1	29.02	22.62	25.82	chr3L_10568263_A2bp1
chr3L	10573673	10573674	A2bp1	39.6	22.9	31.25	chr3L_10573674_A2bp1
chr3L	10662772	10662773	CG8003	32.07	20.82	26.45	chr3L_10662773_CG8003
chr3L	20098493	20098494	CG14186	34.2	21.3	27.75	chr3L_20098494_CG14186
chr3L	21831417	21831418	CG7148	18.5	29.6	24.05	chr3L_21831418_CG7148
chr3L	23148124	23148125	CG32350	38.1	37.5	37.8	chr3L_23148125_CG32350
chr3L	23747549	23747550	CG17698	30.27	40.33	35.3	chr3L_23747550_CG17698
chr3L	23934990	23934991	CG40470	39.9	29.77	34.84	chr3L_23934991_CG40470
chr3L	2463177	2463178	CG45186	46.4	20.8	33.6	chr3L_2463178_CG45186
chr3L	2478371	2478372	CG45186	28.6	21.2	24.9	chr3L_2478372_CG45186
chr3L	2500029	2500030	CG16758	38.97	34.85	36.91	chr3L_2500030_CG16758
chr3L	2603618	2603619	Pxn	62.5	47.6	55.05	chr3L_2603619_Pxn
chr3L	2640503	2640504	CG42245	38.5	30	34.25	chr3L_2640504_CG42245
chr3L	2640503	2640504	MEP-1	38.5	30	34.25	chr3L_2640504_MEP-1
chr3L	2769794	2769795	CG9977	35.1	21.7	28.4	chr3L_2769795_CG9977
chr3L	2770326	2770327	CG9977	29.77	30.77	30.27	chr3L_2770327_CG9977
chr3L	2772622	2772623	CG12093	30.9	34.3	32.6	chr3L_2772623_CG12093
chr3L	2772700	2772701	CG12093	32.4	27.3	29.85	chr3L_2772701_CG12093
chr3L	2773175	2773176	CG12093	32.6	27.3	29.95	chr3L_2773176_CG12093
chr3L	2773217	2773218	CG12093	22.4	28.2	25.3	chr3L_2773218_CG12093
chr3L	2778438	2778439	Atg2	25	24	24.5	chr3L_2778439_Atg2
chr3L	2781004	2781005	mRpS35	52.5	23.7	38.1	chr3L_2781005_mRpS35
chr3L	9894180	9894181	CG14164	35.7	20.5	28.1	chr3L_9894181_CG14164
chr3L	9894180	9894181	CG6709	35.7	20.5	28.1	chr3L_9894181_CG6709
chr3L	9896304	9896305	CG6707	36.3	33.9	35.1	chr3L_9896305_CG6707
chr3R	15412910	15412911	Atx2	34	27.3	30.65	chr3R_15412911_Atx2
chr3R	17090737	17090738	cal1	24	38.6	31.3	chr3R_17090738_cal1
chr3R	20783415	20783416	Syp	85.4	21.7	53.55	chr3R_20783416_Syp
chr3R	21632283	21632284	E2f	15.4	17.4	16.4	chr3R_21632284_E2f
chr3R	22764647	22764648	CG4721	18.1	15.7	16.9	chr3R_22764648_CG4721
chr3R	22764850	22764851	CG7029	24.3	22.8	23.55	chr3R_22764851_CG7029
chr3R	22764850	22764851	Usp12-46	24.3	22.8	23.55	chr3R_22764851_Usp12-46
chr3R	22765162	22765163	CG7029	26.3	28.6	27.45	chr3R_22765163_CG7029
chr3R	22765162	22765163	Usp12-46	26.3	28.6	27.45	chr3R_22765163_Usp12-46
chr3R	7570490	7570491	CG34127	35	33.3	34.15	chr3R_7570491_CG34127
chr3R	7571441	7571442	CG34127	18.1	18.27	18.19	chr3R_7571442_CG34127
chr3R	8018616	8018617	CG2747	38.17	31.82	35	chr3R_8018617_CG2747
chr3R	8242306	8242307	CG9636	23.3	30.4	26.85	chr3R_8242307_CG9636
chr3R	8347370	8347371	DppIII	38.9	22.9	30.9	chr3R_8347371_DppIII
chr4	268391	268392	NfI	35.1	40.9	38	chr4_268392_NfI
chr4	540479	540480	Thd1	29.6	41.9	35.75	chr4_540480_Thd1
chr4	623483	623484	mav	37.5	42.2	39.85	chr4_623484_mav
chr4	692502	692503	myo	34.9	53.4	44.15	chr4_692503_myo
chrX	10329252	10329253	Gip	24.6	21.7	23.15	chrX_10329253_Gip
chrX	18828307	18828308	CG42450	16.5	18.4	17.45	chrX_18828308_CG42450
