# Supplementary material for: Antagonistic roles for Ataxin-2 structured and disordered domains in RNP condensation
Source: eLife. 2021 Mar 10;10:e60326. doi: 10.7554/eLife.60326 (PMC7946432; doi:10.7554/eLife.60326)
Supplement: Supplementary file 2. — Each genotype is presented as a sheet within this file, and the raw and processed sequencing data is available at GEO accession number GSE153985. [file elife-60326-supp2.xlsx]

## Sheet: Atx2 WT Brain
chrom	start	end	Gene	Replicate 1 Edit Percentage	Replicate 2 Edit Percentage	Average Edit Percentage
chr2L	10003938	10003939	CG4747	0.7	0.8	0.75
chr2L	10004550	10004551	CR44873	1.35	0.7	1.02
chr2L	10005471	10005472	CG4747	0.5	0.6	0.55
chr2L	10005801	10005802	CG4747	1.1	0.6	0.85
chr2L	10005869	10005870	CG4747	0.6	0.7	0.65
chr2L	10005885	10005886	CG4747	0.55	0.7	0.62
chr2L	10006179	10006180	CG4747	0.5	0.6	0.55
chr2L	10006414	10006415	CG4747	0.6	0.8	0.7
chr2L	10006970	10006971	CG4747	0.4	0.4	0.4
chr2L	10007001	10007002	CG4747	0.5	0.5	0.5
chr2L	10007263	10007264	CG4747	0.4	0.4	0.4
chr2L	10007333	10007334	CG4747	0.6	1.4	1
chr2L	10007440	10007441	CG4747	0.6	0.5	0.55
chr2L	10007829	10007830	CG4747	1.1	1.1	1.1
chr2L	10007922	10007923	CG4747	0.7	0.7	0.7
chr2L	10007927	10007928	CG4747	0.7	0.6	0.65
chr2L	10007993	10007994	CG4747	0.4	0.8	0.6
chr2L	10008050	10008051	CG4747	3.5	2.8	3.15
chr2L	100084	100085	Zir	0.4	0.7	0.55
chr2L	10008582	10008583	CG4747	0.5	1.1	0.8
chr2L	10008693	10008694	CG4747	0.5	0.6	0.55
chr2L	10009434	10009435	Trp1	0.9	0.9	0.9
chr2L	10010531	10010532	Trp1	0.9	1.3	1.1
chr2L	100107	100108	Zir	0.4	0.4	0.4
chr2L	10010765	10010766	Trp1	0.4	0.5	0.45
chr2L	10010977	10010978	Trp1	0.2	0.45	0.32
chr2L	10010979	10010980	Trp1	0.2	0.2	0.2
chr2L	10010998	10010999	Trp1	0.3	0.2	0.25
chr2L	10011069	10011070	Trp1	0.2	0.2	0.2
chr2L	10011097	10011098	Trp1	0.2	0.3	0.25
chr2L	10011195	10011196	Trp1	0.3	0.3	0.3
chr2L	10011630	10011631	Trp1	0.2	0.2	0.2
chr2L	10011676	10011677	Trp1	0.2	0.2	0.2
chr2L	10011685	10011686	Trp1	0.2	0.2	0.2
chr2L	10011700	10011701	Trp1	0.45	0.75	0.6
chr2L	100118	100119	Zir	0.4	0.4	0.4
chr2L	10012467	10012468	Trp1	0.3	0.4	0.35
chr2L	10012587	10012588	Trp1	0.3	0.4	0.35
chr2L	10012613	10012614	Trp1	1.2	0.3	0.75
chr2L	10012775	10012776	Trp1	2.5	1.9	2.2
chr2L	10012938	10012939	Trp1	0.4	0.3	0.35
chr2L	100280	100281	Zir	0.4	0.5	0.45
chr2L	100331	100332	Zir	0.4	0.4	0.4
chr2L	100414	100415	Zir	0.4	0.4	0.4
chr2L	10064819	10064820	CG44153	1.8	1.6	1.7
chr2L	10065953	10065954	CG44153	1.9	3.8	2.85
chr2L	100674	100675	Zir	0.4	0.5	0.45
chr2L	10069065	10069066	CG44153	2.4	1.7	2.05
chr2L	10074224	10074225	CG44153	1.6	4.5	3.05
chr2L	10075335	10075336	CG44153	1.7	3.5	2.6
chr2L	10075337	10075338	CG44153	1.6	2	1.8
chr2L	10076248	10076249	CG44153	2.1	3.8	2.95
chr2L	1008389	1008390	IA-2	1.2	2.5	1.85
chr2L	1008393	1008394	IA-2	1	1	1
chr2L	1008403	1008404	IA-2	2.3	1.7	2
chr2L	1008425	1008426	IA-2	0.8	0.48	0.64
chr2L	1008428	1008429	IA-2	0.4	0.4	0.4
chr2L	1008439	1008440	IA-2	5.42	3.5	4.46
chr2L	1008440	1008441	IA-2	2.4	0.8	1.6
chr2L	1008468	1008469	IA-2	1.3	2.4	1.85
chr2L	1008480	1008481	IA-2	0.3	0.2	0.25
chr2L	1008491	1008492	IA-2	0.1	0.1	0.1
chr2L	1008525	1008526	IA-2	3.2	1.35	2.28
chr2L	1008583	1008584	IA-2	3	4.1	3.55
chr2L	1008639	1008640	IA-2	3.47	4.15	3.81
chr2L	1008643	1008644	IA-2	0.3	0.35	0.32
chr2L	1008663	1008664	IA-2	0.3	0.2	0.25
chr2L	1008687	1008688	IA-2	12.5	12.7	12.6
chr2L	1008688	1008689	IA-2	6.4	8.4	7.4
chr2L	1008689	1008690	IA-2	5.2	7.1	6.15
chr2L	1008690	1008691	IA-2	0.9	1	0.95
chr2L	1008692	1008693	IA-2	1.2	0.65	0.92
chr2L	1008695	1008696	IA-2	0.5	0.4	0.45
chr2L	1008737	1008738	IA-2	0.7	2.2	1.45
chr2L	1008752	1008753	IA-2	0.8	0.6	0.7
chr2L	1008754	1008755	IA-2	0.7	0.6	0.65
chr2L	1008759	1008760	IA-2	1.8	4.7	3.25
chr2L	1008874	1008875	IA-2	3.7	2.5	3.1
chr2L	1008883	1008884	IA-2	0.6	0.3	0.45
chr2L	1008920	1008921	IA-2	0.3	0.2	0.25
chr2L	1008931	1008932	IA-2	0.1	0.1	0.1
chr2L	1008961	1008962	IA-2	0.1	0.1	0.1
chr2L	1008978	1008979	IA-2	0.3	0.1	0.2
chr2L	1008982	1008983	IA-2	1.1	1.5	1.3
chr2L	1008993	1008994	IA-2	4.6	3.6	4.1
chr2L	1009009	1009010	IA-2	1.73	1.23	1.48
chr2L	1009080	1009081	IA-2	19.4	12.5	15.95
chr2L	1009081	1009082	IA-2	6.6	6.2	6.4
chr2L	1009086	1009087	IA-2	1.9	0.9	1.4
chr2L	1009101	1009102	IA-2	0.4	0.8	0.6
chr2L	1009109	1009110	IA-2	2.8	2	2.4
chr2L	1009110	1009111	IA-2	1.7	1.6	1.65
chr2L	1009138	1009139	IA-2	2.47	1.43	1.95
chr2L	1009175	1009176	IA-2	0.2	0.3	0.25
chr2L	1009189	1009190	IA-2	1.9	1.3	1.6
chr2L	1009199	1009200	IA-2	0.1	0.2	0.15
chr2L	1009209	1009210	IA-2	0.2	0.5	0.35
chr2L	1009219	1009220	IA-2	0.5	0.3	0.4
chr2L	1009220	1009221	IA-2	1.2	0.2	0.7
chr2L	1009223	1009224	IA-2	0.5	0.6	0.55
chr2L	1009230	1009231	IA-2	0.45	0.6	0.52
chr2L	1009244	1009245	IA-2	0.2	0.8	0.5
chr2L	1009366	1009367	IA-2	0.12	0.38	0.25
chr2L	1009382	1009383	IA-2	0.22	0.22	0.22
chr2L	1009410	1009411	IA-2	0.1	0.1	0.1
chr2L	1009414	1009415	IA-2	0.92	0.22	0.57
chr2L	1009424	1009425	IA-2	2.8	1.4	2.1
chr2L	1009440	1009441	IA-2	37.1	29.2	33.15
chr2L	1009444	1009445	IA-2	0.7	0.8	0.75
chr2L	1009454	1009455	IA-2	0.52	0.52	0.52
chr2L	1009463	1009464	IA-2	1.4	0.62	1.01
chr2L	1009474	1009475	IA-2	0.2	0.1	0.15
chr2L	1009505	1009506	IA-2	0.2	0.2	0.2
chr2L	1009538	1009539	IA-2	0.4	0.12	0.26
chr2L	1009585	1009586	IA-2	0.2	0.38	0.29
chr2L	1009605	1009606	IA-2	0.5	0.25	0.38
chr2L	1009618	1009619	IA-2	0.15	0.35	0.25
chr2L	1009678	1009679	IA-2	0.1	0.1	0.1
chr2L	1009687	1009688	IA-2	0.3	0.1	0.2
chr2L	1009690	1009691	IA-2	0.75	0.55	0.65
chr2L	1009707	1009708	IA-2	0.1	0.3	0.2
chr2L	1009732	1009733	IA-2	1.2	1.3	1.25
chr2L	1009737	1009738	IA-2	0.2	0.2	0.2
chr2L	1009748	1009749	IA-2	0.2	0.3	0.25
chr2L	10097804	10097805	CG44153	2.1	2.8	2.45
chr2L	1009783	1009784	IA-2	0.7	0.3	0.5
chr2L	1009803	1009804	IA-2	0.43	0.25	0.34
chr2L	1009818	1009819	IA-2	0.6	0.2	0.4
chr2L	1009833	1009834	IA-2	0.2	0.2	0.2
chr2L	1009834	1009835	IA-2	0.3	0.3	0.3
chr2L	1009839	1009840	IA-2	0.5	0.3	0.4
chr2L	1009853	1009854	IA-2	0.15	0.38	0.26
chr2L	1009855	1009856	IA-2	0.35	0.4	0.38
chr2L	1009878	1009879	IA-2	0.12	0.1	0.11
chr2L	1009905	1009906	IA-2	0.2	0.1	0.15
chr2L	1009906	1009907	IA-2	0.1	0.1	0.1
chr2L	1009907	1009908	IA-2	0.1	0.1	0.1
chr2L	1009914	1009915	IA-2	0.2	0.1	0.15
chr2L	1009915	1009916	IA-2	0.2	0.1	0.15
chr2L	1009932	1009933	IA-2	0.2	0.3	0.25
chr2L	1009937	1009938	IA-2	0.3	0.1	0.2
chr2L	1009945	1009946	IA-2	0.1	0.1	0.1
chr2L	1009955	1009956	IA-2	0.25	0.5	0.38
chr2L	1009973	1009974	IA-2	7.9	5.55	6.72
chr2L	1009974	1009975	IA-2	0.9	0.5	0.7
chr2L	1009989	1009990	IA-2	0.1	0.18	0.14
chr2L	1010005	1010006	IA-2	0.25	0.35	0.3
chr2L	1010011	1010012	IA-2	0.95	0.78	0.86
chr2L	1010018	1010019	IA-2	0.35	0.35	0.35
chr2L	1010047	1010048	IA-2	0.2	0.5	0.35
chr2L	1010052	1010053	IA-2	0.4	0.9	0.65
chr2L	1010053	1010054	IA-2	1.35	0.5	0.92
chr2L	1010054	1010055	IA-2	1.4	1	1.2
chr2L	1010058	1010059	IA-2	1.5	1.4	1.45
chr2L	1010060	1010061	IA-2	2.4	1.9	2.15
chr2L	1010062	1010063	IA-2	5	5.38	5.19
chr2L	1010070	1010071	IA-2	0.4	0.9	0.65
chr2L	1010072	1010073	IA-2	2.17	1.57	1.87
chr2L	1010074	1010075	IA-2	1.82	0.43	1.12
chr2L	1010094	1010095	IA-2	0.2	0.25	0.22
chr2L	1010096	1010097	IA-2	0.2	0.1	0.15
chr2L	1010098	1010099	IA-2	0.22	0.18	0.2
chr2L	1010125	1010126	IA-2	0	0.1	0.05
chr2L	1010383	1010384	IA-2	0.08	0.18	0.13
chr2L	1010384	1010385	IA-2	0.1	0	0.05
chr2L	1010395	1010396	IA-2	0.3	0	0.15
chr2L	1010435	1010436	IA-2	0.1	0.1	0.1
chr2L	1010469	1010470	IA-2	0.2	0.2	0.2
chr2L	1010481	1010482	IA-2	0.3	0.1	0.2
chr2L	1010504	1010505	IA-2	0.85	0.9	0.88
chr2L	1010516	1010517	IA-2	0.6	1	0.8
chr2L	1010606	1010607	IA-2	0.1	0	0.05
chr2L	1010609	1010610	IA-2	0.38	0.28	0.33
chr2L	1010640	1010641	IA-2	0.2	0.1	0.15
chr2L	101091	101092	Zir	0.4	0.8	0.6
chr2L	101110	101111	Zir	0.4	0.4	0.4
chr2L	1011180	1011181	IA-2	0.8	0.88	0.84
chr2L	1011344	1011345	IA-2	0.22	0.2	0.21
chr2L	1011346	1011347	IA-2	0.1	0.15	0.12
chr2L	1011352	1011353	IA-2	0.02	0.08	0.05
chr2L	1011421	1011422	IA-2	0.2	0.5	0.35
chr2L	1011427	1011428	IA-2	1.45	1.82	1.64
chr2L	1011439	1011440	IA-2	0.2	0.2	0.2
chr2L	1011463	1011464	IA-2	0.1	0.2	0.15
chr2L	1011479	1011480	IA-2	0.2	0.2	0.2
chr2L	1011480	1011481	IA-2	0.2	0.2	0.2
chr2L	1011482	1011483	IA-2	24.4	19	21.7
chr2L	1011484	1011485	IA-2	0.2	0.5	0.35
chr2L	1011486	1011487	IA-2	0.92	0.48	0.7
chr2L	1011490	1011491	IA-2	0.6	0.2	0.4
chr2L	1011495	1011496	IA-2	0.1	0.2	0.15
chr2L	1011511	1011512	IA-2	1.12	0.38	0.75
chr2L	1011515	1011516	IA-2	0.2	0.5	0.35
chr2L	1011542	1011543	IA-2	1.53	2.25	1.89
chr2L	1011544	1011545	IA-2	0.4	1.2	0.8
chr2L	1011546	1011547	IA-2	1.18	1.77	1.48
chr2L	1011548	1011549	IA-2	1.7	1.7	1.7
chr2L	1011550	1011551	IA-2	1.3	1.3	1.3
chr2L	1011594	1011595	IA-2	0.2	0.2	0.2
chr2L	1011604	1011605	IA-2	0.2	0.2	0.2
chr2L	1011607	1011608	IA-2	0.2	0.2	0.2
chr2L	1011623	1011624	IA-2	0.3	0.2	0.25
chr2L	1011631	1011632	IA-2	0.4	0.32	0.36
chr2L	1011637	1011638	IA-2	2.85	2.25	2.55
chr2L	1011656	1011657	IA-2	0.15	0.3	0.22
chr2L	1011657	1011658	IA-2	0.2	0.2	0.2
chr2L	1011668	1011669	IA-2	0.2	0.5	0.35
chr2L	1011682	1011683	IA-2	0.2	0.3	0.25
chr2L	1011705	1011706	IA-2	1.3	0.8	1.05
chr2L	1011728	1011729	IA-2	0.4	0.1	0.25
chr2L	1011729	1011730	IA-2	2.55	2.23	2.39
chr2L	1011731	1011732	IA-2	0.98	0.52	0.75
chr2L	1011738	1011739	IA-2	0.18	0.12	0.15
chr2L	1011743	1011744	IA-2	0.38	0.7	0.54
chr2L	1011745	1011746	IA-2	0.35	0.28	0.32
chr2L	1011753	1011754	IA-2	1.18	0.92	1.05
chr2L	1011757	1011758	IA-2	0.3	0.1	0.2
chr2L	1011758	1011759	IA-2	0.4	0.3	0.35
chr2L	1011774	1011775	IA-2	0.5	0.3	0.4
chr2L	1011779	1011780	IA-2	4.4	3.8	4.1
chr2L	1011780	1011781	IA-2	1.6	1.2	1.4
chr2L	1011783	1011784	IA-2	0.2	0.1	0.15
chr2L	1011784	1011785	IA-2	0.48	0.73	0.6
chr2L	1011827	1011828	IA-2	1.2	1.1	1.15
chr2L	1011830	1011831	IA-2	1.95	1.2	1.57
chr2L	1011840	1011841	IA-2	0.22	0.32	0.27
chr2L	1011848	1011849	IA-2	0.1	0.1	0.1
chr2L	1011852	1011853	IA-2	0.5	0.2	0.35
chr2L	1011853	1011854	IA-2	0.3	0.2	0.25
chr2L	1011873	1011874	IA-2	2.1	0.8	1.45
chr2L	1011887	1011888	IA-2	0.2	0.2	0.2
chr2L	1011903	1011904	IA-2	0.2	0.2	0.2
chr2L	1011909	1011910	IA-2	0.2	0.3	0.25
chr2L	1011917	1011918	IA-2	0.45	0.75	0.6
chr2L	1011982	1011983	IA-2	0.2	0.2	0.2
chr2L	1011996	1011997	IA-2	0.2	0.1	0.15
chr2L	1012018	1012019	IA-2	0.7	0.52	0.61
chr2L	1012024	1012025	IA-2	0.7	0.55	0.62
chr2L	1012109	1012110	IA-2	4.3	3.12	3.71
chr2L	1012116	1012117	IA-2	0.22	0.25	0.24
chr2L	1012134	1012135	IA-2	0.6	0.4	0.5
chr2L	1012146	1012147	IA-2	0.1	0.2	0.15
chr2L	1012156	1012157	IA-2	0.1	0.1	0.1
chr2L	1012184	1012185	IA-2	0.8	0.7	0.75
chr2L	1012213	1012214	IA-2	7	5.6	6.3
chr2L	1012218	1012219	IA-2	2.8	2.2	2.5
chr2L	1012228	1012229	IA-2	0.2	0.4	0.3
chr2L	1012237	1012238	IA-2	0.4	1	0.7
chr2L	1012238	1012239	IA-2	1.98	1	1.49
chr2L	1012242	1012243	IA-2	0.55	0.48	0.52
chr2L	1012255	1012256	IA-2	8.2	6	7.1
chr2L	1012568	1012569	IA-2	0.15	0.05	0.1
chr2L	1012574	1012575	IA-2	0	0	0
chr2L	1012580	1012581	IA-2	0	0.1	0.05
chr2L	1012586	1012587	IA-2	0	0	0
chr2L	1012592	1012593	IA-2	0.3	0.22	0.26
chr2L	1012599	1012600	IA-2	0	0	0
chr2L	1012609	1012610	IA-2	0.2	0.1	0.15
chr2L	1012617	1012618	IA-2	0.02	0.1	0.06
chr2L	1012624	1012625	IA-2	0.45	0.7	0.57
chr2L	1012634	1012635	IA-2	0.95	1.6	1.27
chr2L	1012689	1012690	IA-2	0.65	0.38	0.52
chr2L	1012695	1012696	IA-2	0.8	0.3	0.55
chr2L	1012698	1012699	IA-2	0.45	0.55	0.5
chr2L	1012715	1012716	IA-2	0.1	0.4	0.25
chr2L	1012849	1012850	IA-2	0.6	0.2	0.4
chr2L	1012853	1012854	IA-2	0.12	0.38	0.25
chr2L	1012871	1012872	IA-2	0.1	0.2	0.15
chr2L	1012879	1012880	IA-2	0	0.1	0.05
chr2L	1012886	1012887	IA-2	0.1	0.1	0.1
chr2L	1012895	1012896	IA-2	0.1	0.2	0.15
chr2L	1012927	1012928	IA-2	0.4	0.52	0.46
chr2L	1013013	1013014	IA-2	0.1	0.02	0.06
chr2L	1013070	1013071	IA-2	0	0.1	0.05
chr2L	1013108	1013109	IA-2	0.65	0.4	0.52
chr2L	1013118	1013119	IA-2	0	0.2	0.1
chr2L	1013124	1013125	IA-2	1.43	0.55	0.99
chr2L	1013457	1013458	IA-2	0.32	0.25	0.29
chr2L	1013469	1013470	IA-2	0.18	0.2	0.19
chr2L	1013513	1013514	IA-2	3.8	4.8	4.3
chr2L	1013522	1013523	IA-2	0.4	0.3	0.35
chr2L	1013547	1013548	IA-2	0.1	0.1	0.1
chr2L	1013552	1013553	IA-2	0.3	0.1	0.2
chr2L	1013555	1013556	IA-2	0.1	0.1	0.1
chr2L	1013575	1013576	IA-2	0.1	0.4	0.25
chr2L	1013605	1013606	IA-2	0.1	0.1	0.1
chr2L	1013766	1013767	IA-2	0.02	0.1	0.06
chr2L	101465	101466	Zir	0.3	0.3	0.3
chr2L	1014655	1014656	IA-2	0.1	0.1	0.1
chr2L	1014711	1014712	IA-2	1.65	1.55	1.6
chr2L	101485	101486	Zir	0.7	0.3	0.5
chr2L	1015129	1015130	IA-2	0	0.1	0.05
chr2L	1015251	1015252	IA-2	0.2	0.1	0.15
chr2L	1015430	1015431	IA-2	0.3	0.38	0.34
chr2L	101581	101582	Zir	0.5	1.8	1.15
chr2L	101595	101596	Zir	0.5	0.9	0.7
chr2L	1016026	1016027	IA-2	0.1	0	0.05
chr2L	1016209	1016210	IA-2	0.08	0.1	0.09
chr2L	1016214	1016215	IA-2	0.08	0.12	0.1
chr2L	1016903	1016904	IA-2	0.1	0.1	0.1
chr2L	101870	101871	Zir	2.8	2.4	2.6
chr2L	10199808	10199809	Ripalpha	1.6	1.6	1.6
chr2L	10199913	10199914	Ripalpha	1	0.9	0.95
chr2L	10199931	10199932	Ripalpha	1.2	0.9	1.05
chr2L	10199935	10199936	Ripalpha	1.1	1	1.05
chr2L	10199948	10199949	Ripalpha	2.6	1	1.8
chr2L	10199949	10199950	Ripalpha	1.3	1.1	1.2
chr2L	10200025	10200026	Ripalpha	1	0.8	0.9
chr2L	10200190	10200191	Ripalpha	1.4	1	1.2
chr2L	10200194	10200195	Ripalpha	1.4	3	2.2
chr2L	10200230	10200231	Ripalpha	1.3	3.3	2.3
chr2L	10200331	10200332	Ripalpha	1	1.1	1.05
chr2L	10200461	10200462	Ripalpha	1.2	1.2	1.2
chr2L	10201133	10201134	RpL7	0.12	0.15	0.14
chr2L	10201140	10201141	RpL7	1.43	1.55	1.49
chr2L	10201144	10201145	RpL7	0.1	0.1	0.1
chr2L	10201145	10201146	RpL7	0.2	0.3	0.25
chr2L	10201250	10201251	RpL7	0.1	0.05	0.08
chr2L	10201434	10201435	RpL7	0.2	0.28	0.24
chr2L	10202593	10202594	CG34159	1.3	1	1.15
chr2L	10202788	10202789	CG34159	2	1.5	1.75
chr2L	10202858	10202859	CG34159	0.8	0.7	0.75
chr2L	10202949	10202950	CG34159	0.6	0.5	0.55
chr2L	10203505	10203506	CG34159	0.6	0.5	0.55
chr2L	10204908	10204909	CG5734	3.3	1.8	2.55
chr2L	10205163	10205164	CG5734	1	1.1	1.05
chr2L	10205393	10205394	CG5734	0.6	0.6	0.6
chr2L	10206065	10206066	CG5734	0.6	0.7	0.65
chr2L	10206131	10206132	CG5734	0.7	0.8	0.75
chr2L	10206290	10206291	CG5734	0.7	0.8	0.75
chr2L	10206304	10206305	CG5734	1.5	0.8	1.15
chr2L	10206440	10206441	CG5734	0.7	0.9	0.8
chr2L	10206572	10206573	CG5734	0.9	1	0.95
chr2L	10206651	10206652	CG5734	1.12	0.82	0.97
chr2L	10210464	10210465	CG5727	1.47	1.38	1.42
chr2L	10211676	10211677	CG4901	3	7.4	5.2
chr2L	10214312	10214313	Npc1a	0.3	0.3	0.3
chr2L	10214329	10214330	Npc1a	0.3	0.3	0.3
chr2L	10214380	10214381	Npc1a	0.45	0.3	0.38
chr2L	10214478	10214479	Npc1a	0.4	0.4	0.4
chr2L	10214706	10214707	Npc1a	0.32	0.4	0.36
chr2L	10214988	10214989	Npc1a	0.3	0.4	0.35
chr2L	10215264	10215265	Npc1a	0.3	0.7	0.5
chr2L	10215337	10215338	Npc1a	0.3	0.3	0.3
chr2L	10215531	10215532	Npc1a	0.4	0.4	0.4
chr2L	10215777	10215778	Npc1a	0.4	0.5	0.45
chr2L	10215827	10215828	Npc1a	0.7	0.4	0.55
chr2L	10216194	10216195	Npc1a	0.6	0.3	0.45
chr2L	10216320	10216321	Npc1a	0.3	0.6	0.45
chr2L	10216416	10216417	Npc1a	0.3	0.3	0.3
chr2L	10216442	10216443	Npc1a	0.3	0.4	0.35
chr2L	10216574	10216575	Npc1a	0.3	0.45	0.38
chr2L	10216702	10216703	Npc1a	0.4	0.4	0.4
chr2L	10216965	10216966	Npc1a	0.4	0.9	0.65
chr2L	10217084	10217085	Npc1a	0.3	0.4	0.35
chr2L	10217107	10217108	Npc1a	0.3	0.4	0.35
chr2L	10217122	10217123	Npc1a	0.5	0.4	0.45
chr2L	10217167	10217168	Npc1a	0.3	0.8	0.55
chr2L	10217358	10217359	Npc1a	0.7	0.5	0.6
chr2L	10217386	10217387	Npc1a	0.4	0.5	0.45
chr2L	10217426	10217427	Npc1a	0.4	0.6	0.5
chr2L	10217479	10217480	Npc1a	0.4	0.5	0.45
chr2L	10217529	10217530	Npc1a	0.5	0.6	0.55
chr2L	10217633	10217634	Npc1a	0.4	1	0.7
chr2L	10217779	10217780	Npc1a	0.3	1.1	0.7
chr2L	10217795	10217796	Npc1a	0.4	0.6	0.5
chr2L	10218063	10218064	Npc1a	0.4	0.5	0.45
chr2L	10218796	10218797	Npc1a	0.3	0.4	0.35
chr2L	10218801	10218802	Npc1a	0.3	0.4	0.35
chr2L	10218881	10218882	Npc1a	0.5	0.5	0.5
chr2L	10220698	10220699	Npc1a	0.7	0.7	0.7
chr2L	10220771	10220772	Npc1a	0.6	0.7	0.65
chr2L	10221625	10221626	Prosalpha6	1.2	0.7	0.95
chr2L	10223553	10223554	CG4908	1.3	1.4	1.35
chr2L	10223946	10223947	CG4908	1.8	2	1.9
chr2L	10224258	10224259	CG4908	3.6	1.5	2.55
chr2L	10224737	10224738	CG5708	1.1	0.9	1
chr2L	10224773	10224774	CG5708	1	0.5	0.75
chr2L	10224818	10224819	CG5708	0.3	0.3	0.3
chr2L	10225279	10225280	CG5708	4.55	1.57	3.06
chr2L	10225337	10225338	CG5708	0.3	1.1	0.7
chr2L	10225369	10225370	CG5708	0.3	0.38	0.34
chr2L	10225557	10225558	CG5708	0.3	0.3	0.3
chr2L	10225689	10225690	CG5708	0.3	0.3	0.3
chr2L	10225725	10225726	CG5708	0.3	0.3	0.3
chr2L	10225798	10225799	CG5708	0.5	0.4	0.45
chr2L	10225935	10225936	CG5708	2.1	2	2.05
chr2L	10228153	10228154	CG5694	1.3	1.2	1.25
chr2L	10228214	10228215	CG5694	1.48	1.62	1.55
chr2L	10228340	10228341	CG5694	1	1	1
chr2L	10229237	10229238	CG5694	0.9	1.7	1.3
chr2L	10229250	10229251	CG5694	0.9	0.8	0.85
chr2L	10229278	10229279	CG5694	0.8	0.8	0.8
chr2L	10229818	10229819	CG5694	0.9	1.1	1
chr2L	10233827	10233828	eEF1delta	0.6	0.3	0.45
chr2L	10234237	10234238	eEF1delta	0.3	0.3	0.3
chr2L	10241417	10241418	me31B	0.3	0.2	0.25
chr2L	10241631	10241632	me31B	0.3	0.3	0.3
chr2L	10241922	10241923	me31B	0.3	0.3	0.3
chr2L	10242084	10242085	me31B	0.9	0.8	0.85
chr2L	10242965	10242966	chico	1.2	1.3	1.25
chr2L	10242977	10242978	chico	1	1.1	1.05
chr2L	10243185	10243186	chico	0.8	1	0.9
chr2L	10243463	10243464	chico	0.9	0.8	0.85
chr2L	10243583	10243584	chico	0.9	0.9	0.9
chr2L	10243665	10243666	CR44995	0.8	0.8	0.8
chr2L	10243718	10243719	chico	0.9	0.8	0.85
chr2L	10243899	10243900	CR44995	0.7	0.7	0.7
chr2L	10244151	10244152	CR44995	0.9	1	0.95
chr2L	10244278	10244279	chico	5.5	4	4.75
chr2L	10244279	10244280	chico	0.9	1	0.95
chr2L	10244306	10244307	chico	2	1	1.5
chr2L	10244698	10244699	chico	1.7	0.8	1.25
chr2L	10244755	10244756	chico	1	1	1
chr2L	10244836	10244837	chico	1.1	1	1.05
chr2L	10245063	10245064	chico	1.1	1.1	1.1
chr2L	10245670	10245671	chico	0.9	1.3	1.1
chr2L	10245763	10245764	chico	1	1	1
chr2L	10245822	10245823	chico	1.3	1.2	1.25
chr2L	10245968	10245969	CR44995	2.7	1.4	2.05
chr2L	10245975	10245976	chico	1.3	1.8	1.55
chr2L	10247593	10247594	bsk	0.4	0.3	0.35
chr2L	10247615	10247616	bsk	0.3	0.5	0.4
chr2L	10247643	10247644	bsk	0.4	0.2	0.3
chr2L	10247648	10247649	bsk	0.2	0.3	0.25
chr2L	10247717	10247718	bsk	0.25	0.3	0.28
chr2L	10247888	10247889	bsk	0.2	0.3	0.25
chr2L	10247937	10247938	bsk	0.1	0.1	0.1
chr2L	10248007	10248008	bsk	0.2	0.5	0.35
chr2L	10248202	10248203	bsk	0.1	0.3	0.2
chr2L	10248203	10248204	bsk	0.25	0.1	0.18
chr2L	10248218	10248219	bsk	6.8	4.72	5.76
chr2L	10248304	10248305	bsk	0.2	0.5	0.35
chr2L	10248306	10248307	bsk	0.28	0.22	0.25
chr2L	10248554	10248555	bsk	0.3	0.1	0.2
chr2L	10248573	10248574	bsk	0.1	0.2	0.15
chr2L	10248788	10248789	bsk	0.2	0.2	0.2
chr2L	10248789	10248790	bsk	0.2	0.2	0.2
chr2L	10248848	10248849	bsk	0.2	0.2	0.2
chr2L	10248849	10248850	bsk	1.62	1	1.31
chr2L	10248850	10248851	bsk	0.2	0.2	0.2
chr2L	10249096	10249097	bsk	0.2	0.1	0.15
chr2L	10249105	10249106	bsk	7.6	7.1	7.35
chr2L	10249106	10249107	bsk	0.57	0.6	0.58
chr2L	10249120	10249121	bsk	0.6	0.15	0.38
chr2L	10249580	10249581	bsk	4.3	5.3	4.8
chr2L	10250994	10250995	CG31717	0.6	0.6	0.6
chr2L	10251151	10251152	CG31717	3.1	1.1	2.1
chr2L	10251521	10251522	CG31717	4.45	2.45	3.45
chr2L	10251987	10251988	Ror	2.2	2	2.1
chr2L	10252396	10252397	Ror	4.3	1.8	3.05
chr2L	10252532	10252533	Ror	3.3	1.7	2.5
chr2L	10252544	10252545	Ror	3.5	1.7	2.6
chr2L	10252815	10252816	Ror	1.3	2.1	1.7
chr2L	10252944	10252945	Ror	3.4	1.9	2.65
chr2L	10253256	10253257	Ror	4.7	2	3.35
chr2L	10253430	10253431	Ror	1.9	1.9	1.9
chr2L	10253805	10253806	Ror	2	1.9	1.95
chr2L	10254006	10254007	Ror	10.8	6.3	8.55
chr2L	10254829	10254830	CG5676	1.7	0.3	1
chr2L	10254958	10254959	CG5676	0.15	0.2	0.18
chr2L	10255725	10255726	CG5676	0.4	0.2	0.3
chr2L	10255747	10255748	CG5676	0.2	0.1	0.15
chr2L	10255777	10255778	CG5676	0.2	0.3	0.25
chr2L	10255785	10255786	CG5676	0.2	0.2	0.2
chr2L	10255808	10255809	CG5676	0.3	0.2	0.25
chr2L	10256987	10256988	Pten	1.8	1.6	1.7
chr2L	10257918	10257919	Pten	1	0.8	0.9
chr2L	10258396	10258397	Pten	0.7	0.6	0.65
chr2L	10258633	10258634	Pten	0.7	0.6	0.65
chr2L	10258871	10258872	Pten	0.8	0.9	0.85
chr2L	10258879	10258880	Pten	0.8	1	0.9
chr2L	10259170	10259171	Pten	0.8	0.78	0.79
chr2L	10259298	10259299	Pten	0.7	0.9	0.8
chr2L	10260781	10260782	Pten	2	2.1	2.05
chr2L	10260817	10260818	Pten	1.7	1.75	1.73
chr2L	10260942	10260943	Pten	2.2	1.9	2.05
chr2L	102610	102611	CG11377	1.1	1.2	1.15
chr2L	10261972	10261973	Rsf1	1.6	1.3	1.45
chr2L	10262079	10262080	Rsf1	0.7	1.9	1.3
chr2L	10262215	10262216	Rsf1	1	0.7	0.85
chr2L	10262348	10262349	Rsf1	1	0.9	0.95
chr2L	10262961	10262962	Rsf1	0.4	0.4	0.4
chr2L	10264622	10264623	CG18619	0.3	0.28	0.29
chr2L	10264817	10264818	CG18619	0.3	0.2	0.25
chr2L	10264965	10264966	CG18619	0.4	0.3	0.35
chr2L	10265689	10265690	Mob3	0.6	0.6	0.6
chr2L	10266036	10266037	Mob3	0.6	0.5	0.55
chr2L	10266038	10266039	Mob3	0.5	0.5	0.5
chr2L	10266041	10266042	Mob3	1.1	0.5	0.8
chr2L	10266072	10266073	Mob3	1.1	0.9	1
chr2L	10266243	10266244	Mob3	0.5	0.5	0.5
chr2L	10266304	10266305	Mob3	0.5	1	0.75
chr2L	10266391	10266392	Mob3	0.5	0.5	0.5
chr2L	10266459	10266460	Mob3	0.8	0.8	0.8
chr2L	10266477	10266478	Mob3	1.2	1	1.1
chr2L	10266494	10266495	Mob3	1.6	1.4	1.5
chr2L	10266521	10266522	Mob3	3.8	3.1	3.45
chr2L	10267550	10267551	CG4953	1.5	3.8	2.65
chr2L	10269149	10269150	CG4957	1.4	1.1	1.25
chr2L	10269182	10269183	CG4957	1.1	1.1	1.1
chr2L	10269207	10269208	CG4957	1.1	2.1	1.6
chr2L	10269269	10269270	CG4957	1	1.4	1.2
chr2L	10269784	10269785	CG4957	1.8	1.6	1.7
chr2L	10270488	10270489	Mulk	1.8	1.5	1.65
chr2L	10270563	10270564	Mulk	2.52	3	2.76
chr2L	10270897	10270898	Mulk	1.2	1.4	1.3
chr2L	10271291	10271292	Mulk	1.2	1.3	1.25
chr2L	10272534	10272535	Utx	3.7	10.5	7.1
chr2L	10272535	10272536	Utx	19.2	5.3	12.25
chr2L	10272593	10272594	Utx	3.2	3.8	3.5
chr2L	10272696	10272697	Utx	2.4	2.1	2.25
chr2L	10272829	10272830	Utx	1.1	2.8	1.95
chr2L	10273061	10273062	Utx	2.1	1.1	1.6
chr2L	10273086	10273087	Utx	1.3	1.2	1.25
chr2L	10273205	10273206	Utx	1.5	1.2	1.35
chr2L	10273368	10273369	Utx	1	1.1	1.05
chr2L	10273493	10273494	Utx	1.4	1.2	1.3
chr2L	10273841	10273842	Utx	1.27	1.5	1.38
chr2L	10274705	10274706	Utx	1.4	1.6	1.5
chr2L	10275469	10275470	Utx	1.4	2.1	1.75
chr2L	10275984	10275985	Utx	1.4	1.5	1.45
chr2L	10282066	10282067	CG5604	0.8	0.3	0.55
chr2L	10282069	10282070	CG5604	0.3	0.3	0.3
chr2L	10282087	10282088	CG5604	0.8	0.3	0.55
chr2L	10282115	10282116	CG5604	0.57	0.5	0.53
chr2L	10282131	10282132	CG5604	0.2	0.2	0.2
chr2L	10282367	10282368	CG5604	0.2	0.3	0.25
chr2L	10282527	10282528	CG5604	0.2	0.2	0.2
chr2L	10282560	10282561	CG5604	0.3	0.4	0.35
chr2L	10282582	10282583	CG5604	0.4	0.2	0.3
chr2L	10282632	10282633	CG5604	0.2	0.2	0.2
chr2L	10282674	10282675	CG5604	0.3	0.2	0.25
chr2L	10282875	10282876	CG5604	0.2	0.2	0.2
chr2L	10282960	10282961	CG5604	0.2	0.2	0.2
chr2L	10283045	10283046	CG5604	0.2	0.2	0.2
chr2L	10283076	10283077	CG5604	0.2	0.2	0.2
chr2L	10283110	10283111	CG5604	0.7	0.2	0.45
chr2L	10283173	10283174	CG5604	0.28	0.3	0.29
chr2L	10283220	10283221	CG5604	0.6	0.73	0.66
chr2L	10283310	10283311	CG5604	0.82	2.73	1.77
chr2L	10283441	10283442	CG5604	0.2	0.3	0.25
chr2L	10283808	10283809	CG5604	0.2	0.6	0.4
chr2L	10283831	10283832	CG5604	0.2	0.3	0.25
chr2L	10284039	10284040	CG5604	0.3	0.3	0.3
chr2L	10284123	10284124	CG5604	0.4	0.4	0.4
chr2L	10284187	10284188	CG5604	0.5	0.6	0.55
chr2L	10284299	10284300	CG5604	0.3	0.3	0.3
chr2L	10284381	10284382	CG5604	0.2	0.3	0.25
chr2L	10284385	10284386	CG5604	0.38	0.3	0.34
chr2L	10284419	10284420	CG5604	0.3	0.3	0.3
chr2L	10284487	10284488	CG5604	0.35	0.3	0.32
chr2L	10284513	10284514	CG5604	0.2	1.1	0.65
chr2L	10284561	10284562	CG5604	0.2	0.3	0.25
chr2L	10284586	10284587	CG5604	0.4	0.5	0.45
chr2L	10284707	10284708	CG5604	0.5	0.6	0.55
chr2L	10284797	10284798	CG5604	0.4	0.5	0.45
chr2L	10284828	10284829	CG5604	0.4	0.6	0.5
chr2L	10284915	10284916	CG5604	0.4	0.5	0.45
chr2L	10284979	10284980	CG5604	0.3	0.4	0.35
chr2L	10284994	10284995	CG5604	0.3	0.8	0.55
chr2L	10285154	10285155	CG5604	0.3	0.3	0.3
chr2L	10285204	10285205	CG5604	0.3	0.3	0.3
chr2L	10285209	10285210	CG5604	0.3	0.3	0.3
chr2L	10285343	10285344	CG5604	0.3	0.3	0.3
chr2L	10285440	10285441	CG5604	0.3	0.4	0.35
chr2L	10285453	10285454	CG5604	0.3	1.1	0.7
chr2L	10285511	10285512	CG5604	0.3	0.4	0.35
chr2L	10285933	10285934	CG5604	0.3	0.6	0.45
chr2L	10285973	10285974	CG5604	0.3	0.4	0.35
chr2L	10286023	10286024	CG5604	0.3	0.4	0.35
chr2L	10286032	10286033	CG5604	0.3	1.3	0.8
chr2L	10286136	10286137	CG5604	0.4	0.6	0.5
chr2L	10286317	10286318	CG5604	0.4	0.5	0.45
chr2L	10286383	10286384	CG5604	0.7	0.5	0.6
chr2L	102864	102865	CG11377	0.9	1.1	1
chr2L	10286499	10286500	CG5604	0.3	0.5	0.4
chr2L	10287002	10287003	CG5604	0.4	0.6	0.5
chr2L	10287250	10287251	CG5604	0.3	0.5	0.4
chr2L	10287401	10287402	CG5604	6.25	7.17	6.71
chr2L	10287908	10287909	CG5604	0.4	0.7	0.55
chr2L	10288082	10288083	CG5604	0.4	0.5	0.45
chr2L	10288292	10288293	CG5604	0.4	0.6	0.5
chr2L	10288329	10288330	CG5604	0.4	0.6	0.5
chr2L	10288580	10288581	CG5604	0.6	2.1	1.35
chr2L	10288677	10288678	CG5604	0.5	1.6	1.05
chr2L	10288702	10288703	CG5604	0.5	0.8	0.65
chr2L	10289113	10289114	CG5604	0.5	2.5	1.5
chr2L	10289232	10289233	CG5604	0.5	0.7	0.6
chr2L	10289669	10289670	CG5604	0.5	0.7	0.6
chr2L	10289723	10289724	CG5604	0.5	0.8	0.65
chr2L	10289734	10289735	CG5604	1.4	1.3	1.35
chr2L	10290191	10290192	CG5604	0.5	1.2	0.85
chr2L	10290434	10290435	CG5604	0.6	1.2	0.9
chr2L	10291123	10291124	CG5604	0.8	1.3	1.05
chr2L	10295920	10295921	CYLD	2.8	6.6	4.7
chr2L	10295989	10295990	CYLD	0.62	0.7	0.66
chr2L	10296101	10296102	CYLD	0.5	0.5	0.5
chr2L	10296223	10296224	CYLD	0.4	0.4	0.4
chr2L	10296683	10296684	CYLD	0.5	0.4	0.45
chr2L	10296796	10296797	CYLD	0.9	0.5	0.7
chr2L	10297115	10297116	CYLD	0.7	0.6	0.65
chr2L	10297284	10297285	CYLD	0.4	0.5	0.45
chr2L	10297340	10297341	CYLD	0.5	0.6	0.55
chr2L	10297440	10297441	CYLD	1	0.6	0.8
chr2L	10297485	10297486	CYLD	0.8	2	1.4
chr2L	10297761	10297762	CYLD	0.7	0.7	0.7
chr2L	10297860	10297861	CR44968	0.6	0.8	0.7
chr2L	10297873	10297874	CR44968	1.3	0.7	1
chr2L	10297905	10297906	CR44968	0.6	0.7	0.65
chr2L	10299146	10299147	CYLD	0.8	0.7	0.75
chr2L	10302467	10302468	nmd	1.5	1.5	1.5
chr2L	10302489	10302490	nmd	1.4	1.3	1.35
chr2L	10302578	10302579	nmd	2.3	1.5	1.9
chr2L	10302779	10302780	nmd	1.33	0.98	1.16
chr2L	10302848	10302849	nmd	0.6	1.1	0.85
chr2L	10303033	10303034	nmd	1.7	1.1	1.4
chr2L	10303113	10303114	nmd	0.6	0.7	0.65
chr2L	10303183	10303184	nmd	0.5	0.5	0.5
chr2L	10303184	10303185	nmd	0.6	1	0.8
chr2L	10303213	10303214	nmd	0.5	0.5	0.5
chr2L	10303318	10303319	nmd	0.5	1.3	0.9
chr2L	10303367	10303368	nmd	0.6	1.1	0.85
chr2L	10303732	10303733	nmd	0.5	1.1	0.8
chr2L	10303829	10303830	nmd	0.6	0.7	0.65
chr2L	10304228	10304229	CG5390	0.4	0.4	0.4
chr2L	10304256	10304257	CG5390	0.4	0.3	0.35
chr2L	10304369	10304370	CG5390	0.9	0.7	0.8
chr2L	10304403	10304404	CG5390	0.4	0.3	0.35
chr2L	10304405	10304406	CG5390	0.4	0.3	0.35
chr2L	10304447	10304448	CG5390	0.4	0.4	0.4
chr2L	10304453	10304454	CG5390	0.4	0.3	0.35
chr2L	10304694	10304695	CG5390	0.3	0.3	0.3
chr2L	10304843	10304844	CG5390	0.3	0.3	0.3
chr2L	10304845	10304846	CG5390	0.3	0.3	0.3
chr2L	10305017	10305018	CG5390	0.3	0.3	0.3
chr2L	10305356	10305357	CG5390	1.4	0.3	0.85
chr2L	10305409	10305410	CG5390	0.4	0.4	0.4
chr2L	10307072	10307073	CG4968	0.7	0.9	0.8
chr2L	10307100	10307101	CG4968	0.7	0.7	0.7
chr2L	10307463	10307464	CG4968	0.6	0.7	0.65
chr2L	10307891	10307892	CG4968	0.9	0.8	0.85
chr2L	10308253	10308254	Cdk5alpha	0.5	0.4	0.45
chr2L	10308297	10308298	Cdk5alpha	0.3	0.2	0.25
chr2L	10308311	10308312	Cdk5alpha	0.2	0.2	0.2
chr2L	10308362	10308363	Cdk5alpha	0.3	0.3	0.3
chr2L	10308428	10308429	Cdk5alpha	0.1	0.1	0.1
chr2L	10308606	10308607	Cdk5alpha	0.1	0.1	0.1
chr2L	10308634	10308635	Cdk5alpha	0.4	0.1	0.25
chr2L	10308651	10308652	Cdk5alpha	0.25	0.1	0.18
chr2L	10308705	10308706	Cdk5alpha	0.6	0.55	0.57
chr2L	10308738	10308739	Cdk5alpha	0.1	0.1	0.1
chr2L	10308740	10308741	Cdk5alpha	0.1	0.1	0.1
chr2L	10308882	10308883	Cdk5alpha	0.1	0.1	0.1
chr2L	10308927	10308928	Cdk5alpha	0.1	0.1	0.1
chr2L	10308928	10308929	Cdk5alpha	0.3	0.2	0.25
chr2L	10309407	10309408	Cdk5alpha	0.1	0.1	0.1
chr2L	10309418	10309419	Cdk5alpha	0.1	0.1	0.1
chr2L	10309525	10309526	Cdk5alpha	0.1	0.3	0.2
chr2L	10309540	10309541	Cdk5alpha	0.2	0.1	0.15
chr2L	10309675	10309676	Cdk5alpha	0.7	0.35	0.52
chr2L	10309721	10309722	Cdk5alpha	0.3	0.1	0.2
chr2L	10309783	10309784	Cdk5alpha	0.2	0.25	0.22
chr2L	10309837	10309838	Cdk5alpha	0.2	0.2	0.2
chr2L	10309840	10309841	Cdk5alpha	0.2	0.5	0.35
chr2L	10309972	10309973	Cdk5alpha	0.3	0.2	0.25
chr2L	10310006	10310007	Cdk5alpha	0.12	0.1	0.11
chr2L	10310126	10310127	Cdk5alpha	0.65	0.62	0.64
chr2L	10310261	10310262	Cdk5alpha	0.2	0.2	0.2
chr2L	10310579	10310580	Cdk5alpha	2.02	1.85	1.94
chr2L	10310591	10310592	Cdk5alpha	0.2	0.35	0.28
chr2L	10310621	10310622	Cdk5alpha	0.1	0.1	0.1
chr2L	10310636	10310637	Cdk5alpha	0.1	0.1	0.1
chr2L	10310695	10310696	Cdk5alpha	0.2	0.2	0.2
chr2L	10310716	10310717	Cdk5alpha	0.3	0.3	0.3
chr2L	10310739	10310740	Cdk5alpha	1.1	0.7	0.9
chr2L	10310833	10310834	Cdk5alpha	2	1.6	1.8
chr2L	10312411	10312412	CG5384	2.2	1.3	1.75
chr2L	10312492	10312493	CG5384	0.5	0.8	0.65
chr2L	10312764	10312765	CG5384	0.4	1	0.7
chr2L	10312872	10312873	CG5384	0.5	0.5	0.5
chr2L	10315022	10315023	CG4972	0.5	0.7	0.6
chr2L	10315592	10315593	CG4972	1.3	0.6	0.95
chr2L	10315664	10315665	CG4972	1.2	0.6	0.9
chr2L	10315694	10315695	CG4972	0.75	0.7	0.72
chr2L	10315771	10315772	CG4972	0.6	0.7	0.65
chr2L	10316249	10316250	CG4972	0.7	0.8	0.75
chr2L	10316357	10316358	CG4972	0.5	0.5	0.5
chr2L	10316789	10316790	CG4972	0.4	0.4	0.4
chr2L	10316985	10316986	CG4972	0.5	0.5	0.5
chr2L	10317040	10317041	CG4972	0.5	0.5	0.5
chr2L	10317295	10317296	CG4972	7.6	1.7	4.65
chr2L	10318068	10318069	CG5381	2	3.2	2.6
chr2L	10318084	10318085	CG5381	4.8	2.8	3.8
chr2L	10318198	10318199	CG5381	1.42	4.38	2.9
chr2L	10318712	10318713	CG5381	1.7	2.7	2.2
chr2L	10318742	10318743	CG5381	1.6	3	2.3
chr2L	103211	103212	CG11377	0.88	0.9	0.89
chr2L	10328382	10328383	CG5375	1	0.7	0.85
chr2L	10328488	10328489	CG5375	0.7	0.5	0.6
chr2L	10328505	10328506	CG5375	0.52	0.5	0.51
chr2L	10328513	10328514	CG5375	0.6	0.4	0.5
chr2L	10328582	10328583	CG5375	0.5	0.4	0.45
chr2L	10328643	10328644	CG5375	0.3	0.3	0.3
chr2L	10328660	10328661	CG5375	0.4	0.3	0.35
chr2L	10328672	10328673	CG5375	0.3	0.3	0.3
chr2L	10328721	10328722	CG5375	0.4	0.3	0.35
chr2L	10328839	10328840	CG5375	0.3	0.6	0.45
chr2L	10329029	10329030	CG5375	0.3	0.3	0.3
chr2L	10329349	10329350	CG5375	0.4	0.4	0.4
chr2L	10329352	10329353	CG5375	0.4	0.4	0.4
chr2L	10329356	10329357	CG5375	1	0.4	0.7
chr2L	10329475	10329476	CG5375	8	3.7	5.85
chr2L	10329509	10329510	CG5375	0.4	0.4	0.4
chr2L	10329919	10329920	CG5375	0.78	0.52	0.65
chr2L	10330040	10330041	CG5375	0.5	0.9	0.7
chr2L	10330404	10330405	CG5375	0.4	0.4	0.4
chr2L	10330464	10330465	CG5375	0.4	0.4	0.4
chr2L	103310	103311	CG11377	0.7	0.7	0.7
chr2L	10331640	10331641	CG5037	0.5	0.4	0.45
chr2L	10331641	10331642	CG5037	0.4	0.4	0.4
chr2L	103317	103318	CG11377	0.7	0.7	0.7
chr2L	10331782	10331783	CG5037	0.8	0.7	0.75
chr2L	10331848	10331849	CG5037	0.4	0.4	0.4
chr2L	10331857	10331858	CG5037	0.4	0.4	0.4
chr2L	10331863	10331864	CG5037	0.8	0.3	0.55
chr2L	10332004	10332005	CG5037	0.7	0.4	0.55
chr2L	10332064	10332065	CG5037	0.8	0.4	0.6
chr2L	10332155	10332156	CG5037	0.9	0.9	0.9
chr2L	10332199	10332200	CG5037	7.9	7.1	7.5
chr2L	10332410	10332411	CG5037	1.2	0.8	1
chr2L	10332533	10332534	CG5037	0.6	0.6	0.6
chr2L	10332770	10332771	CG5037	0.4	0.72	0.56
chr2L	10332843	10332844	CG5037	0.4	0.4	0.4
chr2L	10332885	10332886	CG5037	0.5	0.5	0.5
chr2L	10332899	10332900	CG5037	0.6	1.05	0.82
chr2L	10332920	10332921	CG5037	1.3	1.9	1.6
chr2L	10332958	10332959	CG5037	0.8	0.85	0.82
chr2L	10334303	10334304	GATAd	0.9	1	0.95
chr2L	10334421	10334422	GATAd	0.9	1	0.95
chr2L	10334448	10334449	GATAd	1	1.3	1.15
chr2L	10334513	10334514	GATAd	0.9	1.3	1.1
chr2L	10334697	10334698	GATAd	2.2	1.1	1.65
chr2L	10336349	10336350	GATAd	0.8	1.1	0.95
chr2L	10336387	10336388	GATAd	1.45	1.4	1.42
chr2L	10336717	10336718	GATAd	0.7	1.2	0.95
chr2L	10336734	10336735	GATAd	0.7	1.1	0.9
chr2L	10336777	10336778	GATAd	0.8	1	0.9
chr2L	10336836	10336837	GATAd	0.9	1	0.95
chr2L	10337052	10337053	GATAd	0.7	1.3	1
chr2L	10337190	10337191	GATAd	0.5	0.5	0.5
chr2L	10337285	10337286	GATAd	0.6	0.7	0.65
chr2L	10337373	10337374	GATAd	0.6	0.7	0.65
chr2L	10337382	10337383	GATAd	4.4	1.6	3
chr2L	10337404	10337405	GATAd	0.7	1.5	1.1
chr2L	10337405	10337406	GATAd	1.3	2.3	1.8
chr2L	1033766	1033767	IA-2	0	0.1	0.05
chr2L	10338091	10338092	GATAd	0.8	0.9	0.85
chr2L	10338344	10338345	GATAd	0.7	0.8	0.75
chr2L	1033860	1033861	IA-2	0	0.1	0.05
chr2L	10339593	10339594	SamDC	0.6	0.6	0.6
chr2L	10340165	10340166	SamDC	0.6	0.6	0.6
chr2L	10340747	10340748	SamDC	6.7	6.7	6.7
chr2L	10340947	10340948	SamDC	0.6	0.6	0.6
chr2L	10341304	10341305	SamDC	0.7	0.6	0.65
chr2L	10341352	10341353	SamDC	0.9	1.6	1.25
chr2L	10341360	10341361	SamDC	2.2	1	1.6
chr2L	103415	103416	CG11377	0.7	0.7	0.7
chr2L	10341834	10341835	CG31715	0.3	0.3	0.3
chr2L	10342176	10342177	CG31715	1.1	0.4	0.75
chr2L	10342354	10342355	CG31715	0.6	0.6	0.6
chr2L	10343000	10343001	Sps2	2.2	0.8	1.5
chr2L	103431	103432	CG11377	1.6	0.9	1.25
chr2L	10343109	10343110	Sps2	0.8	1.3	1.05
chr2L	10343241	10343242	Sps2	1.2	0.8	1
chr2L	10343262	10343263	Sps2	2	0.7	1.35
chr2L	10343566	10343567	Sps2	0.8	0.7	0.75
chr2L	10343688	10343689	Sps2	0.88	0.8	0.84
chr2L	10343961	10343962	Sps2	0.7	0.7	0.7
chr2L	10343968	10343969	Sps2	0.7	0.7	0.7
chr2L	10346003	10346004	CG5022	2.3	2.5	2.4
chr2L	10346579	10346580	CG5022	2.1	5.1	3.6
chr2L	10346586	10346587	CG5022	2	2	2
chr2L	10347347	10347348	CG5022	1.7	2.2	1.95
chr2L	10347586	10347587	CG5022	2.3	4.3	3.3
chr2L	10351781	10351782	CG34367	5.9	2.6	4.25
chr2L	103546	103547	CG11377	0.8	0.8	0.8
chr2L	10357054	10357055	CG5045	0.6	0.6	0.6
chr2L	10357207	10357208	CG5045	0.7	1.3	1
chr2L	10357217	10357218	CG5045	1.4	0.6	1
chr2L	10357222	10357223	CG5045	0.7	0.6	0.65
chr2L	10357415	10357416	CG5045	0.8	0.7	0.75
chr2L	10357496	10357497	CG5045	0.8	0.8	0.8
chr2L	10357640	10357641	CG5045	0.9	0.7	0.8
chr2L	10357653	10357654	CG5045	0.9	0.8	0.85
chr2L	10357767	10357768	CG5045	0.8	0.8	0.8
chr2L	10358304	10358305	Cand1	1.8	1.9	1.85
chr2L	10358394	10358395	Cand1	0.8	0.8	0.8
chr2L	10358505	10358506	Cand1	0.8	0.7	0.75
chr2L	10358710	10358711	Cand1	1	1.7	1.35
chr2L	10358747	10358748	Cand1	1.8	0.8	1.3
chr2L	10358760	10358761	Cand1	2.2	7.2	4.7
chr2L	10358850	10358851	Cand1	1.3	1.4	1.35
chr2L	10358901	10358902	Cand1	1.1	1.2	1.15
chr2L	10358911	10358912	Cand1	1.05	1.2	1.12
chr2L	10359714	10359715	Cand1	1	1.2	1.1
chr2L	10360199	10360200	Cand1	1.1	1.1	1.1
chr2L	10360796	10360797	Cand1	1.1	1.1	1.1
chr2L	10361092	10361093	Cand1	1.3	1.7	1.5
chr2L	10361812	10361813	Cand1	0.9	1.1	1
chr2L	10361842	10361843	Cand1	1.1	1.2	1.15
chr2L	10362027	10362028	Cand1	1.1	1.2	1.15
chr2L	10362324	10362325	Cand1	1	1.5	1.25
chr2L	10366942	10366943	CG5056	0.8	0.6	0.7
chr2L	10367798	10367799	CG5056	5.6	4	4.8
chr2L	10368161	10368162	rho-5	3.2	2.4	2.8
chr2L	10368297	10368298	rho-5	0.6	0.4	0.5
chr2L	10368360	10368361	rho-5	0.6	1.4	1
chr2L	10368632	10368633	rho-5	0.6	0.5	0.55
chr2L	10368667	10368668	rho-5	0.5	3.8	2.15
chr2L	10368703	10368704	rho-5	0.98	3.1	2.04
chr2L	10368806	10368807	rho-5	0.9	1.2	1.05
chr2L	10369122	10369123	rho-5	1.9	0.5	1.2
chr2L	10369306	10369307	rho-5	0.8	0.7	0.75
chr2L	10369515	10369516	rho-5	0.5	0.6	0.55
chr2L	10369605	10369606	rho-5	1.2	0.7	0.95
chr2L	10369715	10369716	rho-5	0.6	0.6	0.6
chr2L	10369727	10369728	rho-5	0.6	0.5	0.55
chr2L	10369844	10369845	rho-5	0.6	0.6	0.6
chr2L	10370301	10370302	rho-5	2	1.8	1.9
chr2L	10370443	10370444	rho-5	0.8	0.8	0.8
chr2L	10370683	10370684	rho-5	0.8	0.9	0.85
chr2L	103707	103708	CG11377	1.4	1.1	1.25
chr2L	10371568	10371569	rho-5	0.7	0.8	0.75
chr2L	10371607	10371608	rho-5	0.9	0.8	0.85
chr2L	10371705	10371706	rho-5	0.7	0.7	0.7
chr2L	10371874	10371875	rho-5	1.7	1	1.35
chr2L	10371913	10371914	rho-5	1.7	1.2	1.45
chr2L	10372668	10372669	rho-5	0.7	0.8	0.75
chr2L	10372720	10372721	rho-5	0.8	0.8	0.8
chr2L	10372788	10372789	rho-5	0.8	0.7	0.75
chr2L	10374264	10374265	CG33303	2.9	7.1	5
chr2L	10374321	10374322	CG33303	0.9	1.15	1.02
chr2L	10374416	10374417	CG33303	1.2	0.5	0.85
chr2L	10374569	10374570	CG33303	8.7	11.3	10
chr2L	10374855	10374856	CG33303	1.3	1.6	1.45
chr2L	10375477	10375478	CG33303	0.5	0.7	0.6
chr2L	10376619	10376620	dpr19	1	1.2	1.1
chr2L	10376641	10376642	dpr19	0.8	1	0.9
chr2L	10376791	10376792	dpr19	0.6	0.8	0.7
chr2L	10377325	10377326	dpr19	0.5	0.5	0.5
chr2L	10377858	10377859	dpr19	0.7	0.4	0.55
chr2L	10377928	10377929	dpr19	0.3	0.4	0.35
chr2L	10377935	10377936	dpr19	0.7	0.4	0.55
chr2L	10378147	10378148	dpr19	0.5	0.52	0.51
chr2L	10378161	10378162	dpr19	0.5	1.1	0.8
chr2L	10378198	10378199	dpr19	0.5	0.6	0.55
chr2L	10378360	10378361	dpr19	0.4	0.4	0.4
chr2L	10378365	10378366	dpr19	2.4	0.5	1.45
chr2L	10378380	10378381	dpr19	0.4	0.4	0.4
chr2L	10378576	10378577	dpr19	0.65	0.52	0.58
chr2L	10378729	10378730	dpr19	0.4	0.4	0.4
chr2L	10378770	10378771	dpr19	1.2	0.4	0.8
chr2L	10378929	10378930	dpr19	0.5	0.5	0.5
chr2L	10378957	10378958	dpr19	0.62	0.48	0.55
chr2L	10378967	10378968	dpr19	0.5	0.4	0.45
chr2L	10378969	10378970	dpr19	0.5	0.4	0.45
chr2L	10378998	10378999	dpr19	0.5	0.5	0.5
chr2L	10379007	10379008	dpr19	0.5	0.9	0.7
chr2L	10379102	10379103	dpr19	0.3	0.3	0.3
chr2L	10379129	10379130	dpr19	1.45	1.55	1.5
chr2L	10379151	10379152	dpr19	0.3	0.3	0.3
chr2L	10379397	10379398	dpr19	0.7	0.5	0.6
chr2L	10379773	10379774	dpr19	0.9	1.2	1.05
chr2L	10379845	10379846	dpr19	23	20.8	21.9
chr2L	10379870	10379871	dpr19	3.1	3.1	3.1
chr2L	10386772	10386773	mRpS7	0.6	1.1	0.85
chr2L	10386926	10386927	mRpS7	0.4	0.5	0.45
chr2L	10387003	10387004	mRpS7	0.5	0.5	0.5
chr2L	10387107	10387108	mRpS7	0.5	0.4	0.45
chr2L	10387174	10387175	mRpS7	0.5	0.4	0.45
chr2L	10387267	10387268	mRpS7	0.4	0.8	0.6
chr2L	10387270	10387271	mRpS7	0.8	0.4	0.6
chr2L	10387273	10387274	mRpS7	0.9	0.4	0.65
chr2L	10387352	10387353	mRpS7	0.5	0.5	0.5
chr2L	10387501	10387502	mRpS7	3.52	3.77	3.64
chr2L	10390085	10390086	da	0.8	0.9	0.85
chr2L	10390233	10390234	da	1	0.9	0.95
chr2L	10390559	10390560	da	0.8	0.8	0.8
chr2L	10391316	10391317	da	0.9	1	0.95
chr2L	10391453	10391454	da	0.8	1	0.9
chr2L	10391552	10391553	da	0.7	0.72	0.71
chr2L	10391982	10391983	da	0.9	0.8	0.85
chr2L	10392264	10392265	da	0.6	0.8	0.7
chr2L	10392303	10392304	da	0.6	0.7	0.65
chr2L	10392965	10392966	da	2.4	0.9	1.65
chr2L	10392999	10393000	da	1.18	1	1.09
chr2L	10393117	10393118	da	1.5	1.3	1.4
chr2L	10393955	10393956	Mdh1	0.45	0.2	0.32
chr2L	10394004	10394005	Mdh1	0.1	0.1	0.1
chr2L	10394022	10394023	Mdh1	0.1	0.2	0.15
chr2L	10394126	10394127	Mdh1	0.25	0.15	0.2
chr2L	103945	103946	CG11377	1.1	1.1	1.1
chr2L	10394711	10394712	Mdh1	0.1	0.2	0.15
chr2L	10394939	10394940	Mdh1	0.2	0.2	0.2
chr2L	103969	103970	Nhe1	1.9	3	2.45
chr2L	10396957	10396958	Cnot4	0.7	0.8	0.75
chr2L	10398091	10398092	Cnot4	0.3	0.4	0.35
chr2L	10398217	10398218	Cnot4	0.6	0.4	0.5
chr2L	10398342	10398343	Cnot4	1.62	0.65	1.14
chr2L	10398372	10398373	Cnot4	0.3	1.2	0.75
chr2L	10398455	10398456	Cnot4	0.3	0.4	0.35
chr2L	10398691	10398692	Cnot4	0.4	0.5	0.45
chr2L	10398698	10398699	Cnot4	0.4	0.5	0.45
chr2L	10399458	10399459	Cnot4	2.65	1.75	2.2
chr2L	10399529	10399530	Cnot4	0.28	0.3	0.29
chr2L	10399597	10399598	Cnot4	0.3	0.3	0.3
chr2L	10399609	10399610	Cnot4	0.3	0.3	0.3
chr2L	10399690	10399691	Cnot4	1.1	0.7	0.9
chr2L	10399852	10399853	Cnot4	0.3	0.4	0.35
chr2L	10399973	10399974	Cnot4	0.3	0.3	0.3
chr2L	10399986	10399987	Cnot4	0.3	0.3	0.3
chr2L	10400053	10400054	Cnot4	0.2	0.3	0.25
chr2L	10400070	10400071	Cnot4	0.2	1.4	0.8
chr2L	10400087	10400088	Cnot4	0.68	0.48	0.58
chr2L	10400144	10400145	Cnot4	0.3	0.7	0.5
chr2L	10400174	10400175	Cnot4	0.3	0.3	0.3
chr2L	10400324	10400325	Cnot4	0.4	0.7	0.55
chr2L	10400374	10400375	Cnot4	0.2	0.2	0.2
chr2L	10400467	10400468	Cnot4	0.2	0.3	0.25
chr2L	10400478	10400479	Cnot4	0.5	0.3	0.4
chr2L	10400479	10400480	Cnot4	0.2	0.3	0.25
chr2L	10400610	10400611	Cnot4	0.2	0.3	0.25
chr2L	10400666	10400667	Cnot4	0.2	0.2	0.2
chr2L	10401112	10401113	Cnot4	0.3	0.3	0.3
chr2L	10401134	10401135	Cnot4	0.2	0.3	0.25
chr2L	10401145	10401146	Cnot4	0.2	0.3	0.25
chr2L	10401169	10401170	Cnot4	0.2	0.2	0.2
chr2L	10401218	10401219	Cnot4	0.3	0.6	0.45
chr2L	10401341	10401342	Cnot4	0.4	1.03	0.72
chr2L	10401368	10401369	Cnot4	0.3	0.3	0.3
chr2L	10401369	10401370	Cnot4	0.3	0.3	0.3
chr2L	10401495	10401496	Cnot4	0.75	0.3	0.52
chr2L	10401516	10401517	Cnot4	1.05	1.15	1.1
chr2L	10401572	10401573	Cnot4	0.3	0.3	0.3
chr2L	10401573	10401574	Cnot4	0.3	0.6	0.45
chr2L	10401836	10401837	Cnot4	0.3	0.3	0.3
chr2L	10401850	10401851	Cnot4	1	1	1
chr2L	10401952	10401953	Cnot4	0.2	0.2	0.2
chr2L	10401969	10401970	Cnot4	0.3	0.6	0.45
chr2L	10402011	10402012	Cnot4	0.6	0.3	0.45
chr2L	10402100	10402101	Cnot4	3.75	1.98	2.87
chr2L	10402182	10402183	Cnot4	0.3	0.3	0.3
chr2L	10402192	10402193	Cnot4	0.3	0.4	0.35
chr2L	10402276	10402277	Cnot4	0.3	0.3	0.3
chr2L	10402303	10402304	Cnot4	0.3	0.3	0.3
chr2L	10402316	10402317	Cnot4	0.5	0.2	0.35
chr2L	10402324	10402325	Cnot4	0.5	0.2	0.35
chr2L	10402526	10402527	Cnot4	0.2	0.2	0.2
chr2L	10402687	10402688	Cnot4	0.3	0.3	0.3
chr2L	10402723	10402724	Cnot4	0.3	0.3	0.3
chr2L	10402781	10402782	Cnot4	0.8	0.6	0.7
chr2L	10402784	10402785	Cnot4	0.8	0.6	0.7
chr2L	10402901	10402902	Cnot4	7.8	4.1	5.95
chr2L	10402910	10402911	Cnot4	10.4	6.45	8.43
chr2L	10402931	10402932	Cnot4	2.3	4.7	3.5
chr2L	10402965	10402966	Cnot4	0.7	0.68	0.69
chr2L	10403077	10403078	Cnot4	0.7	0.7	0.7
chr2L	10403300	10403301	CG17768	1	0.7	0.85
chr2L	10403300	10403301	LSm-4	1	0.7	0.85
chr2L	10403548	10403549	CG17768	0.4	0.4	0.4
chr2L	10403548	10403549	LSm-4	0.4	0.4	0.4
chr2L	10403730	10403731	CG17768	0.4	0.4	0.4
chr2L	10403730	10403731	LSm-4	0.4	0.4	0.4
chr2L	10404223	10404224	CG17768	1.9	2.5	2.2
chr2L	10404223	10404224	LSm-4	1.9	2.5	2.2
chr2L	10404263	10404264	CG17768	1.4	1.8	1.6
chr2L	10404263	10404264	LSm-4	1.4	1.8	1.6
chr2L	10404429	10404430	CG17768	1.8	1.7	1.75
chr2L	10404429	10404430	LSm-4	1.8	1.7	1.75
chr2L	10408383	10408384	Ip259	0	0	0
chr2L	10408383	10408384	RpS27A	0	0	0
chr2L	10408747	10408748	Ip259	0.2	0.4	0.3
chr2L	10408747	10408748	RpS27A	0.2	0.4	0.3
chr2L	10408752	10408753	Ip259	0.6	0.3	0.45
chr2L	10408752	10408753	RpS27A	0.6	0.3	0.45
chr2L	10408779	10408780	Ip259	0.1	0.18	0.14
chr2L	10408779	10408780	RpS27A	0.1	0.18	0.14
chr2L	10408821	10408822	Ip259	0.1	0.1	0.1
chr2L	10408821	10408822	RpS27A	0.1	0.1	0.1
chr2L	10408916	10408917	Ip259	0.2	0.2	0.2
chr2L	10408916	10408917	RpS27A	0.2	0.2	0.2
chr2L	10408919	10408920	Ip259	2.05	1.4	1.72
chr2L	10408919	10408920	RpS27A	2.05	1.4	1.72
chr2L	10408920	10408921	Ip259	5.02	3.65	4.34
chr2L	10408920	10408921	RpS27A	5.02	3.65	4.34
chr2L	10409430	10409431	Ip259	0.22	0.12	0.17
chr2L	10409430	10409431	RpS27A	0.22	0.12	0.17
chr2L	10409452	10409453	Ip259	0.1	0.2	0.15
chr2L	10409452	10409453	RpS27A	0.1	0.2	0.15
chr2L	10409522	10409523	Ip259	0.2	0.1	0.15
chr2L	10409522	10409523	RpS27A	0.2	0.1	0.15
chr2L	10409782	10409783	RpS27A	0.1	0	0.05
chr2L	10410648	10410649	CG5355	2	3.1	2.55
chr2L	10410901	10410902	CG5355	0.7	0.8	0.75
chr2L	10411120	10411121	CG5355	1	1.75	1.38
chr2L	10411348	10411349	CG5355	0.9	1.7	1.3
chr2L	10411495	10411496	CG5355	0.8	1.7	1.25
chr2L	10411624	10411625	CG5355	0.7	1.7	1.2
chr2L	10412115	10412116	CG5355	0.5	0.7	0.6
chr2L	10412238	10412239	CG5355	0.7	0.7	0.7
chr2L	10412475	10412476	CG5355	0.8	0.92	0.86
chr2L	10412524	10412525	CG5355	0.8	0.9	0.85
chr2L	104179	104180	Nhe1	2.5	4	3.25
chr2L	10423806	10423807	CG5168	0.5	0.6	0.55
chr2L	10423911	10423912	CG5168	1.1	0.65	0.88
chr2L	10424013	10424014	CG5168	1.2	0.7	0.95
chr2L	10424019	10424020	CG5168	0.5	1.3	0.9
chr2L	10424078	10424079	CG5168	0.4	0.5	0.45
chr2L	10424405	10424406	CG5168	0.4	0.5	0.45
chr2L	10424907	10424908	CG5168	0.4	0.4	0.4
chr2L	10424915	10424916	CG5168	0.4	0.4	0.4
chr2L	10424998	10424999	CG5168	0.3	0.3	0.3
chr2L	10425113	10425114	CG5168	0.3	0.4	0.35
chr2L	10425202	10425203	CG5168	0.3	0.4	0.35
chr2L	10425301	10425302	CG5168	1.6	0.4	1
chr2L	10425339	10425340	CG5168	0.5	0.5	0.5
chr2L	10425717	10425718	SmB	1	0.9	0.95
chr2L	10426021	10426022	SmB	0.9	0.9	0.9
chr2L	10426507	10426508	SmB	1.1	1.1	1.1
chr2L	10426934	10426935	KdelR	1	1.1	1.05
chr2L	10426993	10426994	KdelR	0.4	0.4	0.4
chr2L	10427117	10427118	KdelR	0.3	0.4	0.35
chr2L	10427220	10427221	KdelR	0.3	0.4	0.35
chr2L	10427329	10427330	KdelR	0.6	0.3	0.45
chr2L	10427360	10427361	KdelR	0.3	0.3	0.3
chr2L	10427410	10427411	KdelR	0.3	0.35	0.32
chr2L	10427532	10427533	KdelR	0.4	0.4	0.4
chr2L	10427590	10427591	KdelR	0.9	0.4	0.65
chr2L	10427696	10427697	KdelR	1.05	2	1.52
chr2L	10427762	10427763	KdelR	0.9	0.3	0.6
chr2L	10427896	10427897	KdelR	0.4	0.4	0.4
chr2L	10428146	10428147	KdelR	7.4	3.7	5.55
chr2L	10428376	10428377	KdelR	1.4	1.1	1.25
chr2L	1042994	1042995	IA-2	0.4	0.2	0.3
chr2L	1043005	1043006	IA-2	0	0.1	0.05
chr2L	10430119	10430120	CG5343	2	1	1.5
chr2L	10430792	10430793	CG5343	1.8	1.4	1.6
chr2L	1043154	1043155	IA-2	0.22	0.5	0.36
chr2L	10431630	10431631	TfIIB	0.9	2.1	1.5
chr2L	1043172	1043173	IA-2	0.1	0.3	0.2
chr2L	1043196	1043197	IA-2	0.1	0.2	0.15
chr2L	10432252	10432253	TfIIB	0.82	1	0.91
chr2L	10432461	10432462	TfIIB	0.5	0.5	0.5
chr2L	10433024	10433025	TfIIB	1.6	1.2	1.4
chr2L	10433028	10433029	TfIIB	1.3	1.2	1.25
chr2L	10433155	10433156	CG5337	1.8	0.8	1.3
chr2L	10433176	10433177	CG5337	0.8	0.7	0.75
chr2L	10433669	10433670	CG5337	0.4	0.4	0.4
chr2L	10433917	10433918	CG5337	0.4	0.3	0.35
chr2L	10434060	10434061	CG5337	0.5	0.4	0.45
chr2L	10434076	10434077	CG5337	0.92	1.43	1.18
chr2L	10434092	10434093	CG5337	0.4	0.4	0.4
chr2L	10434102	10434103	CG5337	0.4	0.8	0.6
chr2L	10434166	10434167	CG5337	0.4	0.4	0.4
chr2L	10434193	10434194	CG5337	0.9	0.4	0.65
chr2L	10434297	10434298	CG5337	0.4	0.5	0.45
chr2L	10434396	10434397	CG5337	0.4	1	0.7
chr2L	10434538	10434539	CG5337	0.5	0.6	0.55
chr2L	10434574	10434575	CG5337	0.5	0.5	0.5
chr2L	10434668	10434669	CG5337	0.5	0.45	0.48
chr2L	10434726	10434727	CG5337	0.5	0.5	0.5
chr2L	10434857	10434858	CG5337	0.5	0.5	0.5
chr2L	10434869	10434870	CG5337	0.6	1.5	1.05
chr2L	10434902	10434903	CG5337	0.6	0.5	0.55
chr2L	10434933	10434934	CG5337	0.6	0.5	0.55
chr2L	10435077	10435078	CG5337	0.5	0.62	0.56
chr2L	10435082	10435083	CG5337	0.5	0.7	0.6
chr2L	10435177	10435178	CG5337	0.6	0.6	0.6
chr2L	10435227	10435228	CG5337	1.8	0.6	1.2
chr2L	10435254	10435255	CG5337	3.55	1.75	2.65
chr2L	10435271	10435272	CG5337	0.6	0.88	0.74
chr2L	10435553	10435554	CG5337	1	0.7	0.85
chr2L	10436977	10436978	holn1	2.4	2.3	2.35
chr2L	10437728	10437729	CHIP	0.6	1	0.8
chr2L	10437896	10437897	CHIP	0.6	0.5	0.55
chr2L	10437923	10437924	CHIP	0.5	0.9	0.7
chr2L	10438185	10438186	CHIP	0.5	0.5	0.5
chr2L	10438205	10438206	CHIP	0.5	0.4	0.45
chr2L	10438318	10438319	CHIP	0.5	0.4	0.45
chr2L	10438349	10438350	CHIP	0.4	0.3	0.35
chr2L	10438384	10438385	CHIP	0.5	0.4	0.45
chr2L	10438610	10438611	CHIP	0.5	0.4	0.45
chr2L	10439845	10439846	CG13142	1.6	1.8	1.7
chr2L	10440452	10440453	CG13142	1.2	1.5	1.35
chr2L	104494	104495	Nhe1	0.9	0.9	0.9
chr2L	10454563	10454564	CG5322	5.9	4.5	5.2
chr2L	10457786	10457787	LM408	1.48	0.78	1.13
chr2L	10457818	10457819	LM408	0.75	0.5	0.62
chr2L	10457820	10457821	LM408	1	0.55	0.78
chr2L	10457826	10457827	LM408	0.5	0.5	0.5
chr2L	10458500	10458501	LM408	0.3	0.3	0.3
chr2L	10458725	10458726	LM408	0.2	0.2	0.2
chr2L	10458763	10458764	LM408	0.2	0.3	0.25
chr2L	10458766	10458767	LM408	0.2	0.3	0.25
chr2L	10459266	10459267	LM408	0.3	0.3	0.3
chr2L	10459504	10459505	LM408	0.5	0.6	0.55
chr2L	10459698	10459699	LM408	0.6	0.5	0.55
chr2L	10460327	10460328	LM408	0.2	0.2	0.2
chr2L	10460366	10460367	LM408	0.2	0.2	0.2
chr2L	10460390	10460391	LM408	0.2	0.25	0.22
chr2L	10460795	10460796	LM408	0.2	0.2	0.2
chr2L	10460876	10460877	LM408	0.2	0.2	0.2
chr2L	10460908	10460909	LM408	0.2	0.2	0.2
chr2L	10460944	10460945	LM408	0.2	0.2	0.2
chr2L	10461043	10461044	LM408	0.3	0.2	0.25
chr2L	10461085	10461086	LM408	0.2	0.2	0.2
chr2L	10461173	10461174	LM408	0.2	0.2	0.2
chr2L	10461276	10461277	LM408	0.2	0.3	0.25
chr2L	10461392	10461393	LM408	0.35	0.2	0.28
chr2L	10461458	10461459	LM408	0.2	0.2	0.2
chr2L	10461509	10461510	LM408	0.2	0.2	0.2
chr2L	10461611	10461612	LM408	0.2	0.2	0.2
chr2L	10461722	10461723	LM408	0.22	0.25	0.24
chr2L	10461979	10461980	LM408	0.5	0.5	0.5
chr2L	10461990	10461991	LM408	0.2	0.2	0.2
chr2L	10462262	10462263	LM408	0.2	0.2	0.2
chr2L	10462276	10462277	LM408	0.2	0.2	0.2
chr2L	10462339	10462340	LM408	0.4	0.2	0.3
chr2L	10462434	10462435	LM408	2.7	1.5	2.1
chr2L	1046815	1046816	IA-2	0.1	0.1	0.1
chr2L	1046843	1046844	IA-2	0.1	0.1	0.1
chr2L	1046935	1046936	IA-2	0.1	0.1	0.1
chr2L	1046993	1046994	IA-2	0.3	0.2	0.25
chr2L	10477505	10477506	RluA-2	2.45	2.7	2.58
chr2L	1048008	1048009	IA-2	0.1	0.2	0.15
chr2L	104801	104802	Nhe1	1.2	1.2	1.2
chr2L	10481417	10481418	RluA-2	2.1	8.5	5.3
chr2L	10481662	10481663	RluA-2	1.5	1.7	1.6
chr2L	10481789	10481790	RluA-2	1.5	1.5	1.5
chr2L	10481943	10481944	RluA-2	3.2	2.1	2.65
chr2L	10482160	10482161	RluA-2	1.4	1.3	1.35
chr2L	104823	104824	Nhe1	1.3	1.2	1.25
chr2L	10482389	10482390	RluA-2	1.1	1.1	1.1
chr2L	10482450	10482451	RluA-2	3.3	1.3	2.3
chr2L	10482475	10482476	RluA-2	1.1	1.2	1.15
chr2L	10482627	10482628	RluA-2	3.4	7.1	5.25
chr2L	10483752	10483753	Grip75	1.9	7.62	4.76
chr2L	10484157	10484158	Grip75	4.3	3.9	4.1
chr2L	10484931	10484932	Grip75	1.3	1.5	1.4
chr2L	10485111	10485112	Grip75	3	1.7	2.35
chr2L	10485302	10485303	Grip75	2.2	1.3	1.75
chr2L	10485371	10485372	Grip75	1	1.5	1.25
chr2L	10485623	10485624	Grip75	0.9	0.8	0.85
chr2L	10485625	10485626	CG7456	0.9	0.8	0.85
chr2L	10485642	10485643	CG7456	0.8	1.4	1.1
chr2L	10485705	10485706	Grip75	0.7	0.6	0.65
chr2L	10487360	10487361	CG7456	1.4	1.2	1.3
chr2L	10487363	10487364	CG7456	1.4	1.2	1.3
chr2L	10487859	10487860	CG7456	2.1	2.7	2.4
chr2L	10488063	10488064	CG7456	2	2.4	2.2
chr2L	10488194	10488195	CG7456	1.95	2.85	2.4
chr2L	10488293	10488294	CG7456	1.4	1.5	1.45
chr2L	10488948	10488949	CG6144	21.3	11.1	16.2
chr2L	10489070	10489071	CG6144	0.7	0.7	0.7
chr2L	10489214	10489215	CG6144	0.9	0.9	0.9
chr2L	10489339	10489340	CG6144	0.6	1.5	1.05
chr2L	10489446	10489447	CG6144	0.6	0.7	0.65
chr2L	10489464	10489465	CG6144	0.6	0.7	0.65
chr2L	10489475	10489476	CG6144	5	5.9	5.45
chr2L	10489532	10489533	CG6144	0.7	0.7	0.7
chr2L	10489555	10489556	CG6144	0.7	0.7	0.7
chr2L	10489723	10489724	CG6144	0.9	0.9	0.9
chr2L	10489754	10489755	CG6144	5.2	1.6	3.4
chr2L	10489897	10489898	CG6144	4.3	4.5	4.4
chr2L	10490145	10490146	CG6144	2.9	3.1	3
chr2L	10490158	10490159	CG6144	16.7	1.9	9.3
chr2L	10490286	10490287	CG6144	2.6	13.6	8.1
chr2L	10490332	10490333	CG6144	3.7	1.4	2.55
chr2L	10493425	10493426	Myo31DF	1.6	4.3	2.95
chr2L	10494774	10494775	Myo31DF	5.1	6.3	5.7
chr2L	1050186	1050187	S	1.3	1.3	1.3
chr2L	1050462	1050463	S	0.8	0.8	0.8
chr2L	105060	105061	Nhe1	0.8	1.1	0.95
chr2L	1050621	1050622	S	0.7	0.7	0.7
chr2L	10507671	10507672	CG6094	1.2	1	1.1
chr2L	1050807	1050808	S	9.85	3.6	6.72
chr2L	10511112	10511113	CG45083	2.7	5.4	4.05
chr2L	10511112	10511113	Fatp	2.7	5.4	4.05
chr2L	10511424	10511425	CG45083	0.9	0.6	0.75
chr2L	10511424	10511425	Fatp	0.9	0.6	0.75
chr2L	10511529	10511530	CG45083	0.3	0.3	0.3
chr2L	10511529	10511530	Fatp	0.3	0.3	0.3
chr2L	10511657	10511658	CG45083	0.5	0.3	0.4
chr2L	10511657	10511658	Fatp	0.5	0.3	0.4
chr2L	10511757	10511758	CG45083	0.2	0.3	0.25
chr2L	10511757	10511758	Fatp	0.2	0.3	0.25
chr2L	10511856	10511857	CG45083	5	6.6	5.8
chr2L	10511856	10511857	Fatp	5	6.6	5.8
chr2L	10511913	10511914	CG45083	0.2	0.6	0.4
chr2L	10511913	10511914	Fatp	0.2	0.6	0.4
chr2L	10512051	10512052	CG45083	0.3	0.7	0.5
chr2L	10512051	10512052	Fatp	0.3	0.7	0.5
chr2L	10512201	10512202	CG45083	1	0.9	0.95
chr2L	10512201	10512202	Fatp	1	0.9	0.95
chr2L	10512460	10512461	CG45083	0.4	0.5	0.45
chr2L	10512460	10512461	Fatp	0.4	0.5	0.45
chr2L	10512771	10512772	CG45083	1	1.3	1.15
chr2L	10512771	10512772	Fatp	1	1.3	1.15
chr2L	10512834	10512835	CG45083	0.2	0.3	0.25
chr2L	10512834	10512835	Fatp	0.2	0.3	0.25
chr2L	10513064	10513065	CG45083	0.2	0.3	0.25
chr2L	10513064	10513065	Fatp	0.2	0.3	0.25
chr2L	10513112	10513113	CG45083	0.2	0.3	0.25
chr2L	10513112	10513113	Fatp	0.2	0.3	0.25
chr2L	10513169	10513170	CG45083	0.2	0.3	0.25
chr2L	10513169	10513170	Fatp	0.2	0.3	0.25
chr2L	10513369	10513370	CG45083	0.4	0.6	0.5
chr2L	10513369	10513370	Fatp	0.4	0.6	0.5
chr2L	10513457	10513458	CG45083	0.3	0.4	0.35
chr2L	10513457	10513458	Fatp	0.3	0.4	0.35
chr2L	10516562	10516563	CG45083	0.3	0.4	0.35
chr2L	10516562	10516563	Fatp	0.3	0.4	0.35
chr2L	10517765	10517766	Lrr47	4.8	5.9	5.35
chr2L	1052064	1052065	S	1.75	2.4	2.08
chr2L	1052114	1052115	S	1.4	2	1.7
chr2L	1052238	1052239	S	1.4	1.4	1.4
chr2L	105232	105233	Nhe1	1.3	1.3	1.3
chr2L	1052668	1052669	S	2.4	2.5	2.45
chr2L	1052917	1052918	S	2.4	2.6	2.5
chr2L	1052948	1052949	S	2	2	2
chr2L	10529655	10529656	Lip4	0.5	3	1.75
chr2L	10530373	10530374	Lip4	0.5	2.6	1.55
chr2L	105305	105306	Nhe1	0.8	1.7	1.25
chr2L	10531413	10531414	Lip4	2.4	5.4	3.9
chr2L	105428	105429	Nhe1	0.7	1	0.85
chr2L	10546057	10546058	Trim9	3.7	3.6	3.65
chr2L	106089	106090	Nhe1	1	2.2	1.6
chr2L	1061430	1061431	S	2.1	2.3	2.2
chr2L	1061713	1061714	S	1.5	1.9	1.7
chr2L	10620514	10620515	Trim9	1.4	1.4	1.4
chr2L	10622752	10622753	Trim9	1.5	1.7	1.6
chr2L	10625250	10625251	Trim9	2.5	2.3	2.4
chr2L	10627022	10627023	Trim9	2.2	1.4	1.8
chr2L	10627030	10627031	Trim9	1	1.3	1.15
chr2L	10627091	10627092	Trim9	1.3	2.8	2.05
chr2L	10627191	10627192	Trim9	6.8	15.5	11.15
chr2L	106500	106501	Nhe1	1.1	1	1.05
chr2L	10693103	10693104	CG17108	0.2	0.1	0.15
chr2L	10693223	10693224	CG17108	1	0.4	0.7
chr2L	10694038	10694039	CG17108	0.5	0.3	0.4
chr2L	10694067	10694068	CG17108	0.5	0.2	0.35
chr2L	10729511	10729512	CG6443	0.8	0.9	0.85
chr2L	10729534	10729535	CG6443	1.1	1.2	1.15
chr2L	10729578	10729579	CG6443	1.3	1.2	1.25
chr2L	10729639	10729640	CG6443	3.8	4.6	4.2
chr2L	10730109	10730110	CG6443	1.4	1.5	1.45
chr2L	10730152	10730153	CG6443	1.4	1.48	1.44
chr2L	10730189	10730190	CG6443	1.5	1.6	1.55
chr2L	10731582	10731583	CG6750	0.8	0.7	0.75
chr2L	10731954	10731955	CG6750	2.8	1.4	2.1
chr2L	10732995	10732996	Dpy-30L1	1	1	1
chr2L	10733069	10733070	Dpy-30L1	1.1	0.9	1
chr2L	10733783	10733784	Nup107	2	2.3	2.15
chr2L	10733844	10733845	Nup107	1.7	2.2	1.95
chr2L	10733865	10733866	Nup107	1.7	1.7	1.7
chr2L	10733969	10733970	Nup107	7.5	17.9	12.7
chr2L	10734302	10734303	Nup107	2.5	2.9	2.7
chr2L	10734475	10734476	Nup107	2.3	2.5	2.4
chr2L	10735283	10735284	Nup107	2.5	4.2	3.35
chr2L	10735503	10735504	Nup107	2.4	2.55	2.47
chr2L	10737477	10737478	CG12299	1.2	1.6	1.4
chr2L	10737553	10737554	CG12299	1	1.4	1.2
chr2L	10737630	10737631	CG12299	0.9	1.1	1
chr2L	10737897	10737898	CG12299	1.1	1.2	1.15
chr2L	10738301	10738302	CG12299	5.3	6.17	5.73
chr2L	10738364	10738365	CG12299	2	1.2	1.6
chr2L	10738422	10738423	CG12299	7.45	2.45	4.95
chr2L	10738546	10738547	CG12299	2.2	1.5	1.85
chr2L	10738592	10738593	CG12299	1.4	1.5	1.45
chr2L	10738869	10738870	CG12299	1.5	1.4	1.45
chr2L	10739372	10739373	CG12299	1.2	1	1.1
chr2L	10740051	10740052	CG12299	0.7	0.8	0.75
chr2L	10740072	10740073	CG12299	0.8	0.9	0.85
chr2L	10740096	10740097	CG12299	1.7	1.02	1.36
chr2L	10741548	10741549	CG6729	2.7	4.5	3.6
chr2L	10743086	10743087	CG6729	2.4	3.6	3
chr2L	10744198	10744199	CG17124	1.5	1.6	1.55
chr2L	10744317	10744318	CG17124	1.1	0.7	0.9
chr2L	10744456	10744457	CG17124	0.5	0.5	0.5
chr2L	10744553	10744554	CG17124	0.6	0.5	0.55
chr2L	10744822	10744823	CG17124	0.5	0.4	0.45
chr2L	10744928	10744929	CG17124	0.6	0.6	0.6
chr2L	10744969	10744970	CG17124	0.6	0.5	0.55
chr2L	10745029	10745030	CG17124	0.5	0.5	0.5
chr2L	10745788	10745789	CG17124	0.3	0.2	0.25
chr2L	10745802	10745803	CG17124	0.3	0.2	0.25
chr2L	10745869	10745870	CG17124	0.4	0.3	0.35
chr2L	10745918	10745919	CG17124	0.5	0.4	0.45
chr2L	10745977	10745978	CG17124	0.4	0.62	0.51
chr2L	10745996	10745997	CG17124	0.4	0.3	0.35
chr2L	10755905	10755906	CG17124	0.4	0.3	0.35
chr2L	10755906	10755907	CG17124	0.4	1.25	0.82
chr2L	10755948	10755949	CG17124	0.4	0.6	0.5
chr2L	10756001	10756002	CG17124	0.5	0.4	0.45
chr2L	10756020	10756021	CG17124	0.5	0.4	0.45
chr2L	10756071	10756072	CG17124	0.6	0.5	0.55
chr2L	10756096	10756097	CG17124	0.65	2	1.32
chr2L	10756281	10756282	CG17124	1.2	1.1	1.15
chr2L	10761252	10761253	CG6495	0.3	0.7	0.5
chr2L	10761549	10761550	CG6495	0.4	0.8	0.6
chr2L	10761933	10761934	CG6495	0.5	0.4	0.45
chr2L	10761994	10761995	CG6495	0.5	0.5	0.5
chr2L	10762147	10762148	CG6495	0.6	0.5	0.55
chr2L	10762956	10762957	CG6495	0.7	0.6	0.65
chr2L	10762966	10762967	CG6495	0.6	0.6	0.6
chr2L	10763968	10763969	CG6495	1.15	0.5	0.82
chr2L	10764142	10764143	CG6495	0.6	0.5	0.55
chr2L	10764200	10764201	CG6495	1.2	0.5	0.85
chr2L	10764290	10764291	CG6495	0.4	0.4	0.4
chr2L	10764342	10764343	CG6495	3.3	0.4	1.85
chr2L	10764510	10764511	CG6495	0.4	0.3	0.35
chr2L	10764608	10764609	CG6495	0.4	0.4	0.4
chr2L	10764721	10764722	CG6495	0.5	0.4	0.45
chr2L	10764862	10764863	CG6495	9.8	6.7	8.25
chr2L	10766123	10766124	UbcD2	0.8	1.3	1.05
chr2L	10766766	10766767	UbcD2	1.1	1.4	1.25
chr2L	10766854	10766855	UbcD2	1	1.2	1.1
chr2L	10767800	10767801	UbcD2	1.8	1.1	1.45
chr2L	10768344	10768345	CG6724	4.8	2.6	3.7
chr2L	10768361	10768362	CG6724	4.4	2.5	3.45
chr2L	10768377	10768378	CG6724	4.2	2.38	3.29
chr2L	10768437	10768438	CG6724	5.2	2.1	3.65
chr2L	10768544	10768545	CG6724	1.3	1.8	1.55
chr2L	10768558	10768559	CG6724	1.2	1.6	1.4
chr2L	10768984	10768985	CG6724	1.5	1.8	1.65
chr2L	10769266	10769267	CG6724	1.8	2.2	2
chr2L	10769762	10769763	CG6724	1.6	1.5	1.55
chr2L	1077026	1077027	S	2	3.4	2.7
chr2L	1077654	1077655	S	1.7	2.2	1.95
chr2L	10788954	10788955	CG31869	3	3.75	3.38
chr2L	10805670	10805671	Nos	0.9	0.7	0.8
chr2L	10806029	10806030	Nos	9.7	3	6.35
chr2L	10806191	10806192	Nos	1.8	1.4	1.6
chr2L	10806342	10806343	Nos	1.2	1.7	1.45
chr2L	10806432	10806433	Nos	2.68	4.33	3.5
chr2L	10806501	10806502	Nos	1.1	2.4	1.75
chr2L	10806727	10806728	Nos	1	0.9	0.95
chr2L	10806768	10806769	Nos	1.1	1.1	1.1
chr2L	10807582	10807583	Nos	1.3	1.2	1.25
chr2L	10812292	10812293	Nos	1.2	1.3	1.25
chr2L	10812329	10812330	Nos	1.1	1.1	1.1
chr2L	1081356	1081357	Atg4a	6.55	1.8	4.17
chr2L	108158	108159	Sam-S	0.6	0.7	0.65
chr2L	108162	108163	Sam-S	0.9	0.9	0.9
chr2L	1081673	1081674	Atg4a	1.4	1.6	1.5
chr2L	10818412	10818413	Nos	2.9	1.7	2.3
chr2L	1081910	1081911	Atg4a	1.6	1.3	1.45
chr2L	1082031	1082032	Atg4a	1.3	1	1.15
chr2L	1082196	1082197	Atg4a	1.2	1.4	1.3
chr2L	108222	108223	Sam-S	0.2	0.2	0.2
chr2L	10822992	10822993	Nos	1.3	1.5	1.4
chr2L	108283	108284	Sam-S	0.8	0.9	0.85
chr2L	108311	108312	Sam-S	0.9	0.9	0.9
chr2L	10831503	10831504	Nos	7.8	7.7	7.75
chr2L	1083171	1083172	CG4629	1.3	0.9	1.1
chr2L	1083452	1083453	CG4629	0.7	0.7	0.7
chr2L	1083589	1083590	CG4629	0.77	0.8	0.78
chr2L	1083610	1083611	Atg4a	0.4	0.4	0.4
chr2L	1083636	1083637	Atg4a	0.4	0.4	0.4
chr2L	10837920	10837921	CG6700	4.9	7.9	6.4
chr2L	10838129	10838130	CG6700	0.4	0.2	0.3
chr2L	10838396	10838397	CG6700	3.4	0.4	1.9
chr2L	10838472	10838473	CG6700	0.3	0.3	0.3
chr2L	10838492	10838493	CG6700	0.3	0.3	0.3
chr2L	10838554	10838555	CG6700	0.3	0.3	0.3
chr2L	10838582	10838583	CG6700	0.3	0.3	0.3
chr2L	10839539	10839540	CG6700	0.3	0.4	0.35
chr2L	1083977	1083978	Atg4a	0.4	0.4	0.4
chr2L	10839865	10839866	CG6700	0.2	0.3	0.25
chr2L	10839866	10839867	CG6700	0.2	0.3	0.25
chr2L	10839913	10839914	CG6700	0.2	0.2	0.2
chr2L	10839925	10839926	CG6700	0.2	0.2	0.2
chr2L	10840000	10840001	CG6700	0.2	0.3	0.25
chr2L	10840128	10840129	CG6700	0.2	1	0.6
chr2L	1084016	1084017	CG4629	0.5	0.4	0.45
chr2L	10840180	10840181	CG6700	0.3	0.4	0.35
chr2L	10840245	10840246	CG6700	0.45	0.5	0.48
chr2L	10840554	10840555	CG6700	0.8	0.52	0.66
chr2L	10840595	10840596	CG6700	0.7	0.98	0.84
chr2L	10840680	10840681	CG6700	0.4	0.5	0.45
chr2L	10840755	10840756	CG6700	0.4	0.5	0.45
chr2L	10840975	10840976	CG6700	0.3	0.7	0.5
chr2L	10841022	10841023	CG6700	0.5	0.4	0.45
chr2L	10841036	10841037	CG6700	0.3	0.4	0.35
chr2L	1084127	1084128	Atg4a	1	1	1
chr2L	10841271	10841272	CG6700	0.3	0.4	0.35
chr2L	10841374	10841375	CG6700	0.2	0.4	0.3
chr2L	10841438	10841439	CG6700	0.2	0.3	0.25
chr2L	10841450	10841451	CG6700	0.2	0.7	0.45
chr2L	1084147	1084148	Atg4a	0.5	0.6	0.55
chr2L	10841474	10841475	CG6700	0.35	0.3	0.32
chr2L	10841483	10841484	CG6700	0.2	0.3	0.25
chr2L	10841500	10841501	CG6700	0.2	0.3	0.25
chr2L	10841614	10841615	CG6700	0.3	0.5	0.4
chr2L	10841667	10841668	CG6700	0.4	0.5	0.45
chr2L	10841772	10841773	CG6700	0.8	1.3	1.05
chr2L	10841864	10841865	CG6700	1.1	1.5	1.3
chr2L	1084193	1084194	CG4629	0.5	0.65	0.57
chr2L	10841955	10841956	CG6700	0.5	0.8	0.65
chr2L	10841991	10841992	CG6700	0.5	1.3	0.9
chr2L	1084236	1084237	Atg4a	0.5	0.5	0.5
chr2L	1084307	1084308	CG4629	0.4	0.4	0.4
chr2L	1084365	1084366	CG4629	1.2	1.3	1.25
chr2L	1084372	1084373	Atg4a	0.4	0.4	0.4
chr2L	1084378	1084379	CG4629	0.4	0.5	0.45
chr2L	1084550	1084551	Atg4a	0.4	0.5	0.45
chr2L	1084589	1084590	CG4629	0.5	0.5	0.5
chr2L	1084598	1084599	CG4629	0.4	0.5	0.45
chr2L	1084617	1084618	CG4629	0.4	0.5	0.45
chr2L	1084628	1084629	CG4629	0.4	1.1	0.75
chr2L	1084646	1084647	Atg4a	0.4	0.5	0.45
chr2L	1084676	1084677	CG4629	0.4	0.5	0.45
chr2L	10847283	10847284	porin	0.3	0.3	0.3
chr2L	10847354	10847355	porin	0.2	0.3	0.25
chr2L	10847389	10847390	porin	0.3	0.2	0.25
chr2L	10847401	10847402	porin	0.3	1.1	0.7
chr2L	10847501	10847502	porin	0.12	0.1	0.11
chr2L	1084754	1084755	Atg4a	0.6	0.6	0.6
chr2L	1084773	1084774	Atg4a	0.6	0.6	0.6
chr2L	10847742	10847743	porin	0.1	0.1	0.1
chr2L	1084790	1084791	CG4629	0.7	0.6	0.65
chr2L	10848099	10848100	porin	0.08	0.1	0.09
chr2L	1084823	1084824	Atg4a	0.6	0.6	0.6
chr2L	10848561	10848562	porin	0	0.1	0.05
chr2L	1085037	1085038	Atg4a	0.7	0.7	0.7
chr2L	10850758	10850759	CG43129	0.1	0.02	0.06
chr2L	10850784	10850785	CG43129	0.1	0.1	0.1
chr2L	1085098	1085099	Atg4a	1.05	1.2	1.12
chr2L	1085120	1085121	Atg4a	0.8	0.6	0.7
chr2L	1085269	1085270	CG4629	0.6	0.7	0.65
chr2L	10852791	10852792	CG43129	5.6	5.6	5.6
chr2L	10854664	10854665	Dnz1	3.3	2.4	2.85
chr2L	10854666	10854667	Dnz1	2.1	3.05	2.58
chr2L	10854822	10854823	Dnz1	2.5	2.2	2.35
chr2L	10854940	10854941	Dnz1	1.5	1.5	1.5
chr2L	10855015	10855016	Dnz1	2.67	4.1	3.38
chr2L	10855673	10855674	Dnz1	1	1.1	1.05
chr2L	10858708	10858709	Stam	0.6	0.9	0.75
chr2L	10858805	10858806	Stam	0.6	1.05	0.82
chr2L	1085932	1085933	CG4629	0.7	0.6	0.65
chr2L	1085958	1085959	CG4629	0.7	0.7	0.7
chr2L	1085982	1085983	CG4629	1.5	1.5	1.5
chr2L	10860063	10860064	Stam	0.72	2.1	1.41
chr2L	10860328	10860329	Stam	0.7	1.3	1
chr2L	10860477	10860478	Stam	0.7	1.1	0.9
chr2L	10860844	10860845	Stam	0.5	0.7	0.6
chr2L	10861013	10861014	Stam	0.7	1	0.85
chr2L	10861044	10861045	Stam	0.8	1.3	1.05
chr2L	10861204	10861205	Stam	0.6	0.7	0.65
chr2L	10861646	10861647	Stam	0.6	1	0.8
chr2L	1087919	1087920	CG4629	0.7	2.5	1.6
chr2L	1088002	1088003	CG4629	0.6	0.7	0.65
chr2L	10917147	10917148	dpr2	2.6	2.5	2.55
chr2L	10918816	10918817	dpr2	2.2	2.1	2.15
chr2L	10923226	10923227	dpr2	1.6	2.4	2
chr2L	10923667	10923668	dpr2	1.2	1.4	1.3
chr2L	10965620	10965621	CG33129	0.3	0.45	0.38
chr2L	10966032	10966033	CG33129	0.4	1	0.7
chr2L	10966191	10966192	CG33129	0.8	0.9	0.85
chr2L	10966564	10966565	CG33129	0.4	0.5	0.45
chr2L	10969687	10969688	CG33129	2.5	3.8	3.15
chr2L	10970765	10970766	YL-1	1.2	1.5	1.35
chr2L	10971155	10971156	YL-1	2.7	1.3	2
chr2L	10971162	10971163	YL-1	1.5	1.6	1.55
chr2L	10971685	10971686	YL-1	1.4	1.1	1.25
chr2L	10971794	10971795	YL-1	4.2	6.7	5.45
chr2L	10972784	10972785	CG16743	0.2	0.3	0.25
chr2L	10972973	10972974	CG16743	1	0.5	0.75
chr2L	10973189	10973190	CG16743	0.3	0.3	0.3
chr2L	10975160	10975161	abo	2.4	3.1	2.75
chr2L	10975832	10975833	l(2)06225	0.3	0.7	0.5
chr2L	10975836	10975837	l(2)06225	0.2	0.4	0.3
chr2L	10975844	10975845	l(2)06225	0.2	0.2	0.2
chr2L	10975893	10975894	l(2)06225	0.1	0.1	0.1
chr2L	10976077	10976078	l(2)06225	0.7	0.9	0.8
chr2L	10976365	10976366	l(2)06225	0.2	0.4	0.3
chr2L	10977938	10977939	SCAR	0.6	0.7	0.65
chr2L	10978032	10978033	SCAR	0.5	0.7	0.6
chr2L	10978102	10978103	SCAR	0.4	0.6	0.5
chr2L	10978183	10978184	SCAR	0.5	0.7	0.6
chr2L	10978219	10978220	SCAR	0.5	0.8	0.65
chr2L	10978334	10978335	SCAR	0.5	1.1	0.8
chr2L	10978372	10978373	SCAR	0.4	0.5	0.45
chr2L	10978465	10978466	SCAR	0.7	0.5	0.6
chr2L	10978607	10978608	SCAR	0.4	0.5	0.45
chr2L	10978684	10978685	SCAR	0.4	0.5	0.45
chr2L	10978851	10978852	SCAR	2	2.5	2.25
chr2L	10980472	10980473	SCAR	0.4	0.5	0.45
chr2L	10980629	10980630	SCAR	0.5	0.6	0.55
chr2L	10980672	10980673	SCAR	1.12	1.3	1.21
chr2L	10981007	10981008	SCAR	1	1.1	1.05
chr2L	10981068	10981069	SCAR	0.7	0.7	0.7
chr2L	10981202	10981203	SCAR	0.72	0.72	0.72
chr2L	10981256	10981257	SCAR	0.78	1.4	1.09
chr2L	10981371	10981372	SCAR	0.3	0.4	0.35
chr2L	10981401	10981402	SCAR	0.3	0.4	0.35
chr2L	10981516	10981517	SCAR	0.3	0.8	0.55
chr2L	10981521	10981522	SCAR	0.3	0.4	0.35
chr2L	10981562	10981563	SCAR	0.4	0.4	0.4
chr2L	10981630	10981631	SCAR	0.52	0.62	0.57
chr2L	10981648	10981649	SCAR	0.3	0.4	0.35
chr2L	10981682	10981683	SCAR	0.3	0.4	0.35
chr2L	10981704	10981705	SCAR	0.4	0.4	0.4
chr2L	10981794	10981795	SCAR	0.4	0.4	0.4
chr2L	10981804	10981805	SCAR	0.8	0.4	0.6
chr2L	10981943	10981944	SCAR	1.4	0.8	1.1
chr2L	10981950	10981951	SCAR	0.9	0.9	0.9
chr2L	10981960	10981961	SCAR	1	0.9	0.95
chr2L	10982221	10982222	piwi	2.9	3.03	2.96
chr2L	10988413	10988414	CG12253	1.9	1.3	1.6
chr2L	10988601	10988602	CG12253	1.8	1.8	1.8
chr2L	10988833	10988834	CG12253	1.5	1.6	1.55
chr2L	10989777	10989778	CG16833	0.8	0.9	0.85
chr2L	10990119	10990120	CG16833	0.9	3.62	2.26
chr2L	10990418	10990419	CG16833	0.8	1	0.9
chr2L	10990507	10990508	CG16833	0.7	1	0.85
chr2L	10991247	10991248	CG16833	0.6	0.9	0.75
chr2L	10991267	10991268	CG16833	0.6	0.8	0.7
chr2L	10991376	10991377	CG16833	0.6	0.8	0.7
chr2L	10991865	10991866	CG16833	0.5	0.6	0.55
chr2L	10992167	10992168	CG16833	0.7	0.8	0.75
chr2L	10992272	10992273	CG16833	0.6	1.7	1.15
chr2L	10992511	10992512	CG16833	0.8	1	0.9
chr2L	10992832	10992833	CG16833	0.5	0.6	0.55
chr2L	10993084	10993085	CG16833	0.4	0.5	0.45
chr2L	10993171	10993172	CG16833	0.3	0.5	0.4
chr2L	10993376	10993377	CG16833	0.5	0.5	0.5
chr2L	10993623	10993624	CG16833	8.32	11	9.66
chr2L	10993643	10993644	CG16833	0.4	0.5	0.45
chr2L	10993806	10993807	CG16833	0.4	0.5	0.45
chr2L	10993813	10993814	CG16833	0.8	1.1	0.95
chr2L	10993878	10993879	CG16833	0.5	0.5	0.5
chr2L	10993881	10993882	CG16833	0.5	0.5	0.5
chr2L	10993893	10993894	CG16833	0.5	0.6	0.55
chr2L	10993934	10993935	CG16833	1	1.3	1.15
chr2L	10993943	10993944	CG16833	0.4	0.6	0.5
chr2L	10997357	10997358	CG16833	0.8	0.8	0.8
chr2L	11003752	11003753	RpL9	0.6	0.15	0.38
chr2L	11004044	11004045	RpL9	0.7	0.9	0.8
chr2L	11006198	11006199	Nup154	2.5	5.6	4.05
chr2L	11006555	11006556	Nup154	4	2.6	3.3
chr2L	11006813	11006814	Nup154	2.4	3	2.7
chr2L	11007536	11007537	Nup154	1.4	4.5	2.95
chr2L	11007588	11007589	Nup154	1.5	2.6	2.05
chr2L	11007726	11007727	Nup154	1.4	2.6	2
chr2L	11009239	11009240	Nup154	1.7	2	1.85
chr2L	11009694	11009695	Nup154	2	2.9	2.45
chr2L	11009757	11009758	Nup154	2.7	3	2.85
chr2L	1103691	1103692	mtRNApol	1.8	2.9	2.35
chr2L	110420	110421	Sam-S	0.4	0.2	0.3
chr2L	1104488	1104489	mtRNApol	1.8	1.6	1.7
chr2L	1104638	1104639	mtRNApol	1.7	2	1.85
chr2L	1106761	1106762	mtRNApol	1.7	1.6	1.65
chr2L	1107032	1107033	mtRNApol	2.2	2.9	2.55
chr2L	110755	110756	Sam-S	0.2	0.2	0.2
chr2L	11076236	11076237	AstC	4	2.6	3.3
chr2L	11076380	11076381	AstC	2	3	2.5
chr2L	11076381	11076382	AstC	8.3	12.1	10.2
chr2L	11076492	11076493	AstC	7.7	20	13.85
chr2L	110765	110766	Sam-S	0.2	0.2	0.2
chr2L	11076598	11076599	AstC	5.32	1.73	3.53
chr2L	11076651	11076652	AstC	0.2	0.2	0.2
chr2L	11076665	11076666	AstC	0.95	0.8	0.88
chr2L	11076673	11076674	AstC	10.58	9.45	10.02
chr2L	11076674	11076675	AstC	1.4	0.4	0.9
chr2L	11076678	11076679	AstC	8.6	10.6	9.6
chr2L	11076700	11076701	AstC	0.38	0.72	0.55
chr2L	11076713	11076714	AstC	0.1	0.1	0.1
chr2L	11076841	11076842	AstC	0.1	0.1	0.1
chr2L	1107887	1107888	mtRNApol	1.9	2.1	2
chr2L	11086964	11086965	CG16854	1.2	1.7	1.45
chr2L	11087006	11087007	CG16854	1.4	2	1.7
chr2L	110873	110874	Sam-S	0.5	0.22	0.36
chr2L	11088815	11088816	CG16854	1.6	1.8	1.7
chr2L	11089714	11089715	CG16854	2	2	2
chr2L	11089716	11089717	CG16854	1.7	1.8	1.75
chr2L	11089771	11089772	CG16854	1.9	2.3	2.1
chr2L	11089791	11089792	CG16854	1.9	2.4	2.15
chr2L	11090418	11090419	CG16854	1.4	1.5	1.45
chr2L	11090509	11090510	CG16854	1.8	1.6	1.7
chr2L	11090660	11090661	CG16854	1.8	1.8	1.8
chr2L	11090665	11090666	CG16854	1.9	1.9	1.9
chr2L	11090741	11090742	CG16854	2.5	4.7	3.6
chr2L	11090811	11090812	CG16854	6.9	4.3	5.6
chr2L	11091819	11091820	CG4705	2.3	2.3	2.3
chr2L	11091948	11091949	CG4705	2.1	2.2	2.15
chr2L	11092084	11092085	CG4705	2.8	3.4	3.1
chr2L	11093058	11093059	CG4705	2.9	2.1	2.5
chr2L	11095617	11095618	Ge-1	0.9	1.6	1.25
chr2L	11095622	11095623	Ge-1	1	0.9	0.95
chr2L	11095626	11095627	Ge-1	1.8	0.9	1.35
chr2L	11096312	11096313	Ge-1	1.02	1.35	1.19
chr2L	11096414	11096415	Ge-1	1	1.1	1.05
chr2L	11096846	11096847	Ge-1	0.6	1	0.8
chr2L	11096993	11096994	Ge-1	1	1.9	1.45
chr2L	11097162	11097163	Ge-1	2.4	1.38	1.89
chr2L	11097523	11097524	Ge-1	0.9	1.4	1.15
chr2L	11097536	11097537	Ge-1	6.7	2.6	4.65
chr2L	11097599	11097600	Ge-1	1.2	1.6	1.4
chr2L	11097976	11097977	Ge-1	1	1.1	1.05
chr2L	11098044	11098045	Ge-1	1.1	1.2	1.15
chr2L	11098256	11098257	Ge-1	1.6	2.3	1.95
chr2L	11098744	11098745	Ge-1	1.6	2.7	2.15
chr2L	11098782	11098783	Ge-1	1.4	2.1	1.75
chr2L	11099561	11099562	Ge-1	2.8	1.6	2.2
chr2L	11099639	11099640	Ge-1	4.1	2.8	3.45
chr2L	11100085	11100086	Ge-1	1.5	1.8	1.65
chr2L	11100160	11100161	Ge-1	1.5	2.5	2
chr2L	11100301	11100302	Ge-1	2.9	3.8	3.35
chr2L	11100669	11100670	Ge-1	2	2.2	2.1
chr2L	111016	111017	Sam-S	0.5	0.5	0.5
chr2L	11101769	11101770	Reps	1.2	1.1	1.15
chr2L	11102127	11102128	Reps	16.1	20.6	18.35
chr2L	11102237	11102238	Reps	2.7	6.1	4.4
chr2L	11102730	11102731	Reps	1.2	1.6	1.4
chr2L	11102768	11102769	Reps	2.2	2.6	2.4
chr2L	11102769	11102770	Reps	1.1	1.4	1.25
chr2L	11105342	11105343	Reps	1.7	1.9	1.8
chr2L	11105371	11105372	Reps	1.8	2	1.9
chr2L	11105962	11105963	Reps	1.9	1.8	1.85
chr2L	11106007	11106008	Reps	1.5	1.7	1.6
chr2L	11106237	11106238	Reps	1.3	1.6	1.45
chr2L	11106308	11106309	Reps	1.7	2.3	2
chr2L	11107494	11107495	l(2)gd1	1.1	2	1.55
chr2L	11107599	11107600	l(2)gd1	1.6	2.68	2.14
chr2L	11107884	11107885	l(2)gd1	1.4	2.4	1.9
chr2L	11108349	11108350	l(2)gd1	1.3	2.3	1.8
chr2L	11108543	11108544	l(2)gd1	0.9	1.3	1.1
chr2L	11108796	11108797	l(2)gd1	0.8	1.3	1.05
chr2L	111089	111090	Sam-S	0.5	0.5	0.5
chr2L	11110834	11110835	CG6201	2.3	2.2	2.25
chr2L	11111136	11111137	CG6201	1.4	2.6	2
chr2L	11112614	11112615	CG6201	2	4	3
chr2L	11116065	11116066	CG6230	6.9	12.2	9.55
chr2L	11116349	11116350	CG6230	1.5	1.8	1.65
chr2L	11116720	11116721	CG6230	1.1	1	1.05
chr2L	11117629	11117630	CG6230	1.2	1.3	1.25
chr2L	11117861	11117862	CG6230	1.7	1.4	1.55
chr2L	11118194	11118195	CG6230	1.4	1.9	1.65
chr2L	11118465	11118466	CG6230	1.1	1.25	1.18
chr2L	11118573	11118574	CG6230	1.2	1.4	1.3
chr2L	11118828	11118829	CG6230	3.67	1.9	2.79
chr2L	11123244	11123245	Csl4	2.7	5.1	3.9
chr2L	11123386	11123387	Csl4	1.5	1.2	1.35
chr2L	11128815	11128816	Nup160	6.5	5	5.75
chr2L	11129459	11129460	RfC38	2.6	3.6	3.1
chr2L	11129964	11129965	RfC38	2.8	2.3	2.55
chr2L	11132589	11132590	CG4751	1.2	1.8	1.5
chr2L	11132677	11132678	CG4751	1	1.7	1.35
chr2L	11132709	11132710	CG4751	1.7	1.3	1.5
chr2L	11132797	11132798	CG4751	0.9	1.2	1.05
chr2L	11133954	11133955	CG4751	1.6	1.6	1.6
chr2L	11134034	11134035	CG4751	1.7	2.9	2.3
chr2L	11134094	11134095	CG4751	1.8	2.5	2.15
chr2L	11134164	11134165	CG4751	1.3	1.3	1.3
chr2L	11134165	11134166	CG4751	1.1	1.3	1.2
chr2L	1113435	1113436	CG14340	3.8	2.1	2.95
chr2L	11134420	11134421	CG4751	3.6	1.7	2.65
chr2L	1113452	1113453	CG14340	3.7	2	2.85
chr2L	11134721	11134722	CG4751	2.3	2.7	2.5
chr2L	11134947	11134948	CG4751	1.4	1.6	1.5
chr2L	11135234	11135235	CG4751	1.8	2.5	2.15
chr2L	11135434	11135435	CG4751	1.8	4.8	3.3
chr2L	11135511	11135512	CG4751	1.6	2.9	2.25
chr2L	1113666	1113667	CG14340	3.2	1.6	2.4
chr2L	1113833	1113834	CG14340	6.7	2	4.35
chr2L	1113991	1113992	CG14340	4.2	3.1	3.65
chr2L	1114035	1114036	CG14340	5.6	2	3.8
chr2L	1114975	1114976	Pino	0.2	0.3	0.25
chr2L	1114999	1115000	Pino	0.2	0.2	0.2
chr2L	1115006	1115007	Pino	0.22	0.2	0.21
chr2L	1115128	1115129	Pino	0.3	0.3	0.3
chr2L	1115182	1115183	Pino	0.4	0.2	0.3
chr2L	11152260	11152261	CG6287	0.4	0.4	0.4
chr2L	11152350	11152351	CG6287	0.3	0.4	0.35
chr2L	1115259	1115260	Pino	0.2	0.2	0.2
chr2L	1115345	1115346	Pino	0.2	0.2	0.2
chr2L	1115521	1115522	Pino	0.3	0.3	0.3
chr2L	1115581	1115582	Pino	0.32	0.45	0.38
chr2L	1115656	1115657	Pino	0.2	0.3	0.25
chr2L	1115677	1115678	Pino	0.2	0.3	0.25
chr2L	11156843	11156844	Ca-beta	0.95	1.15	1.05
chr2L	11156899	11156900	Ca-beta	0.9	2.7	1.8
chr2L	11157031	11157032	Ca-beta	2.9	1.7	2.3
chr2L	11157124	11157125	Ca-beta	5	2.2	3.6
chr2L	11157132	11157133	Ca-beta	2.7	5.1	3.9
chr2L	11157864	11157865	Ca-beta	0.3	0.8	0.55
chr2L	11157882	11157883	Ca-beta	0.3	0.3	0.3
chr2L	1115794	1115795	Pino	0.6	0.4	0.5
chr2L	11158084	11158085	Ca-beta	0.3	0.3	0.3
chr2L	11158102	11158103	Ca-beta	0.6	0.3	0.45
chr2L	1115811	1115812	Pino	0.3	1.1	0.7
chr2L	11158204	11158205	Ca-beta	0.4	0.4	0.4
chr2L	11158253	11158254	Ca-beta	0.4	0.5	0.45
chr2L	1115847	1115848	Pino	0.4	0.4	0.4
chr2L	11158588	11158589	Ca-beta	0.7	1	0.85
chr2L	11158879	11158880	Ca-beta	0.5	0.6	0.55
chr2L	11159086	11159087	Ca-beta	4.3	2	3.15
chr2L	11159173	11159174	Ca-beta	0.5	0.7	0.6
chr2L	11159204	11159205	Ca-beta	0.4	0.5	0.45
chr2L	1115925	1115926	Pino	0.5	0.5	0.5
chr2L	1115930	1115931	Pino	0.5	0.5	0.5
chr2L	11159405	11159406	Ca-beta	0.7	1.1	0.9
chr2L	11159810	11159811	Ca-beta	0.3	0.5	0.4
chr2L	11159838	11159839	Ca-beta	0.4	0.5	0.45
chr2L	11159933	11159934	Ca-beta	0.5	0.7	0.6
chr2L	11160012	11160013	Ca-beta	0.6	0.9	0.75
chr2L	11160072	11160073	Ca-beta	0.9	1.2	1.05
chr2L	11160206	11160207	Ca-beta	0.8	0.9	0.85
chr2L	11160224	11160225	Ca-beta	0.8	0.9	0.85
chr2L	11160259	11160260	Ca-beta	1.7	1.1	1.4
chr2L	11160317	11160318	Ca-beta	0.7	0.9	0.8
chr2L	11161569	11161570	Ca-beta	1.6	2.9	2.25
chr2L	11162332	11162333	Ca-beta	0.8	1.2	1
chr2L	11162461	11162462	Ca-beta	0.7	1.2	0.95
chr2L	11162595	11162596	Ca-beta	1.7	2.6	2.15
chr2L	11163033	11163034	Ca-beta	0.7	0.9	0.8
chr2L	11163082	11163083	Ca-beta	0.8	0.9	0.85
chr2L	11163270	11163271	Ca-beta	0.6	0.7	0.65
chr2L	11163494	11163495	Ca-beta	0.6	1	0.8
chr2L	11163552	11163553	Ca-beta	2.07	1.2	1.63
chr2L	11163852	11163853	Ca-beta	0.6	1.7	1.15
chr2L	11164805	11164806	Ca-beta	1.8	2.9	2.35
chr2L	11165569	11165570	Ca-beta	1.7	2.9	2.3
chr2L	11165659	11165660	Ca-beta	0.6	0.8	0.7
chr2L	11165673	11165674	Ca-beta	0.6	0.8	0.7
chr2L	11166117	11166118	Ca-beta	0.6	0.9	0.75
chr2L	1116654	1116655	Pino	0.45	0.3	0.38
chr2L	11167002	11167003	Ca-beta	1.6	3.9	2.75
chr2L	11167553	11167554	Ca-beta	2.9	4.5	3.7
chr2L	11179391	11179392	CG4788	3.4	4.5	3.95
chr2L	11179473	11179474	Ca-beta	5	5.6	5.3
chr2L	11179754	11179755	CG4788	6.1	2.9	4.5
chr2L	11179800	11179801	CG4788	13.85	6.75	10.3
chr2L	1118760	1118761	Pino	0.3	0.3	0.3
chr2L	111882	111883	Sam-S	1.7	1.7	1.7
chr2L	1118834	1118835	Pino	0.6	0.4	0.5
chr2L	111960	111961	Sam-S	0.3	0.2	0.25
chr2L	111983	111984	Sam-S	0.6	0.4	0.5
chr2L	11235633	11235634	ab	2.4	2.9	2.65
chr2L	11235993	11235994	ab	1.9	2.9	2.4
chr2L	11236214	11236215	ab	1.8	3.7	2.75
chr2L	11236519	11236520	ab	1.1	1.4	1.25
chr2L	11236723	11236724	ab	2.3	2.6	2.45
chr2L	11255525	11255526	ab	2	1.8	1.9
chr2L	11255822	11255823	ab	1.32	2.3	1.81
chr2L	11256716	11256717	ab	1.3	1.45	1.38
chr2L	11256821	11256822	ab	1.3	1.3	1.3
chr2L	11257134	11257135	ab	5.6	2.7	4.15
chr2L	11257335	11257336	ab	3.17	1.3	2.23
chr2L	11257491	11257492	ab	4.5	5.3	4.9
chr2L	11258020	11258021	ab	1.8	1.25	1.52
chr2L	11258073	11258074	ab	2.9	2.3	2.6
chr2L	11259279	11259280	ab	3.7	5.3	4.5
chr2L	11276261	11276262	cana	12.5	5	8.75
chr2L	112763	112764	Sam-S	0.2	0.2	0.2
chr2L	11279103	11279104	CG33695	3.6	3.4	3.5
chr2L	11279535	11279536	CG33695	2.4	2.2	2.3
chr2L	11280695	11280696	Ppt2	0.6	0.7	0.65
chr2L	1128129	1128130	Pino	1.1	1.1	1.1
chr2L	11281358	11281359	Ppt2	0.9	0.9	0.9
chr2L	11281539	11281540	Ppt2	0.8	0.9	0.85
chr2L	11281669	11281670	Ppt2	2.2	0.8	1.5
chr2L	11281681	11281682	Ppt2	1.6	0.8	1.2
chr2L	11283488	11283489	mre11	2	2.2	2.1
chr2L	112836	112837	Sam-S	0.2	0.2	0.2
chr2L	11284031	11284032	mre11	2.3	3.8	3.05
chr2L	112876	112877	Sam-S	0.1	0.1	0.1
chr2L	1129826	1129827	CG4552	0.9	1.2	1.05
chr2L	1129862	1129863	CG4552	0.9	1.1	1
chr2L	1130327	1130328	CG4552	0.8	1	0.9
chr2L	113036	113037	Sam-S	0.1	0.1	0.1
chr2L	1130438	1130439	CG4552	0.8	2.2	1.5
chr2L	1130699	1130700	CG4552	1	1.5	1.25
chr2L	1131362	1131363	CG4552	1.3	1.3	1.3
chr2L	113145	113146	Sam-S	0.3	0.2	0.25
chr2L	1131489	1131490	CG4552	0.9	1.1	1
chr2L	113157	113158	Sam-S	0.4	0.2	0.3
chr2L	1131612	1131613	CG4552	1	1.2	1.1
chr2L	1131620	1131621	CG4552	1	1.1	1.05
chr2L	1131627	1131628	CG4552	1.8	1.1	1.45
chr2L	113249	113250	Sam-S	4.3	3.9	4.1
chr2L	1132529	1132530	Iris	1	0.5	0.75
chr2L	1132553	1132554	Iris	0.9	0.4	0.65
chr2L	1132574	1132575	Iris	0.4	0.4	0.4
chr2L	1132587	1132588	Iris	0.4	0.3	0.35
chr2L	1132644	1132645	Iris	0.5	0.4	0.45
chr2L	1132688	1132689	Iris	2.45	1.35	1.9
chr2L	1132700	1132701	Iris	0.6	1	0.8
chr2L	1132708	1132709	Iris	1.1	0.5	0.8
chr2L	1132934	1132935	Iris	0.7	0.9	0.8
chr2L	1132954	1132955	Iris	0.7	0.5	0.6
chr2L	1132983	1132984	Iris	0.5	0.4	0.45
chr2L	1133021	1133022	Iris	0.55	0.3	0.43
chr2L	1133043	1133044	Iris	0.3	0.6	0.45
chr2L	113306	113307	Sam-S	0.1	0.28	0.19
chr2L	1133060	1133061	Iris	0.3	0.3	0.3
chr2L	1133064	1133065	Iris	0.3	0.3	0.3
chr2L	1133106	1133107	Iris	0.3	0.3	0.3
chr2L	1133118	1133119	Iris	0.3	0.2	0.25
chr2L	1133266	1133267	Iris	0.4	0.3	0.35
chr2L	1133281	1133282	Iris	0.4	0.3	0.35
chr2L	1133298	1133299	Iris	0.4	0.7	0.55
chr2L	1133306	1133307	Iris	0.4	0.32	0.36
chr2L	1133343	1133344	Iris	0.5	0.4	0.45
chr2L	1133378	1133379	Iris	0.4	0.4	0.4
chr2L	1133575	1133576	Iris	0.4	0.4	0.4
chr2L	1133701	1133702	Iris	0.4	0.8	0.6
chr2L	1133737	1133738	Iris	0.4	0.4	0.4
chr2L	1133856	1133857	Iris	0.4	0.6	0.5
chr2L	1133857	1133858	Iris	0.4	0.6	0.5
chr2L	1133979	1133980	Iris	0.4	0.3	0.35
chr2L	1134013	1134014	Iris	0.5	0.4	0.45
chr2L	1134795	1134796	CG4577	0.2	0.3	0.25
chr2L	1135069	1135070	CG4577	0.35	0.6	0.48
chr2L	1135358	1135359	CG4577	0.4	1.8	1.1
chr2L	113584	113585	Sam-S	0.1	0.6	0.35
chr2L	1136400	1136401	CG4577	0.6	4.42	2.51
chr2L	113646	113647	Sam-S	1.02	0.32	0.67
chr2L	11367999	11368000	salr	1.7	3.4	2.55
chr2L	11368246	11368247	salr	4.4	4.8	4.6
chr2L	113694	113695	Sam-S	6.33	4.47	5.4
chr2L	113727	113728	Sam-S	0.2	0.3	0.25
chr2L	11372990	11372991	salr	2.2	4	3.1
chr2L	1137406	1137407	CG4577	0.4	1.4	0.9
chr2L	113762	113763	Sam-S	0.2	0.2	0.2
chr2L	1137804	1137805	CG4577	1.02	1.5	1.26
chr2L	113861	113862	Sam-S	0.3	0.2	0.25
chr2L	1138622	1138623	CG4577	0.1	0.2	0.15
chr2L	1138662	1138663	CG4577	0.4	0.1	0.25
chr2L	113871	113872	Sam-S	0.3	0.2	0.25
chr2L	1138917	1138918	CG4577	0.1	0.1	0.1
chr2L	1138920	1138921	CG4577	0.2	0.2	0.2
chr2L	1138923	1138924	CG4577	0.38	0.12	0.25
chr2L	1139562	1139563	CG4577	0.08	0.2	0.14
chr2L	1139899	1139900	CG4577	0.08	0.18	0.13
chr2L	1139948	1139949	CG4577	0.8	0.8	0.8
chr2L	1139954	1139955	CG4577	0.1	0.1	0.1
chr2L	1139989	1139990	CG4577	0.52	0.32	0.42
chr2L	1140050	1140051	CG4577	0.1	0.15	0.12
chr2L	1140060	1140061	CG4577	0.1	0.15	0.12
chr2L	1140092	1140093	CG4577	0.1	0.1	0.1
chr2L	1140151	1140152	CG4577	0	0.1	0.05
chr2L	1140159	1140160	CG4577	0.1	0.1	0.1
chr2L	1140160	1140161	CG4577	0	0.1	0.05
chr2L	1140275	1140276	CG4577	0.4	0.8	0.6
chr2L	1140277	1140278	CG4577	0.2	0.2	0.2
chr2L	1140359	1140360	CG4577	0.4	0.4	0.4
chr2L	1140369	1140370	CG4577	0.82	1.52	1.17
chr2L	1140403	1140404	CG4577	0.12	0.22	0.17
chr2L	1140444	1140445	CG4577	0.18	0.1	0.14
chr2L	1140445	1140446	CG4577	0.1	0.1	0.1
chr2L	1140460	1140461	CG4577	0.1	0.2	0.15
chr2L	1140462	1140463	CG4577	0.2	0.2	0.2
chr2L	1140472	1140473	CG4577	0	0.2	0.1
chr2L	1140475	1140476	CG4577	0.1	0.2	0.15
chr2L	1140503	1140504	CG4577	1.6	1.8	1.7
chr2L	1140537	1140538	CG4577	0.05	0.1	0.08
chr2L	1140548	1140549	CG4577	0	0.1	0.05
chr2L	1140552	1140553	CG4577	0.1	0.05	0.08
chr2L	1140575	1140576	CG4577	0.1	0.3	0.2
chr2L	1140608	1140609	CG4577	0.1	0.1	0.1
chr2L	1140630	1140631	CG4577	0.1	0.1	0.1
chr2L	1140666	1140667	CG4577	3.15	3	3.08
chr2L	1140685	1140686	CG4577	0.95	0.45	0.7
chr2L	1140698	1140699	CG4577	40.9	28.1	34.5
chr2L	1140700	1140701	CG4577	3.35	4.22	3.79
chr2L	1140702	1140703	CG4577	0.9	3	1.95
chr2L	1140706	1140707	CG4577	1.55	0.55	1.05
chr2L	1140720	1140721	CG4577	0.5	0.6	0.55
chr2L	1140726	1140727	CG4577	0.5	0.6	0.55
chr2L	1140728	1140729	CG4577	18.1	8.5	13.3
chr2L	1140729	1140730	CG4577	3.8	2.4	3.1
chr2L	1140739	1140740	CG4577	0.4	0.6	0.5
chr2L	1140778	1140779	CG4577	1.1	2.5	1.8
chr2L	1140780	1140781	CG4577	1.1	0.8	0.95
chr2L	1140796	1140797	CG4577	0.5	1.5	1
chr2L	1140876	1140877	CG4577	3.1	0.9	2
chr2L	1140885	1140886	CG4577	0.8	1.9	1.35
chr2L	1140891	1140892	CG4577	0.7	1.2	0.95
chr2L	1148573	1148574	CG4749	4.5	5.3	4.9
chr2L	1149206	1149207	CG4749	4	5.9	4.95
chr2L	11498474	11498475	CG6488	2.3	3.6	2.95
chr2L	1150040	1150041	Tfb4	7.7	8.7	8.2
chr2L	11509307	11509308	CG6509	1.4	1.8	1.6
chr2L	11510131	11510132	CG6509	1.5	1.8	1.65
chr2L	11510213	11510214	CG6509	1.5	1.9	1.7
chr2L	1151127	1151128	Vps29	0.9	1	0.95
chr2L	11511389	11511390	CG6509	2.8	2.8	2.8
chr2L	11512333	11512334	CG6509	3.2	3.6	3.4
chr2L	11513876	11513877	CG6509	2	3	2.5
chr2L	1151397	1151398	Vps29	1.1	1.07	1.08
chr2L	1151400	1151401	Vps29	0.9	0.8	0.85
chr2L	1151402	1151403	Vps29	0.9	0.8	0.85
chr2L	11514662	11514663	CG6509	1.7	3.2	2.45
chr2L	1151732	1151733	capt	2.53	4.17	3.35
chr2L	1151865	1151866	capt	0.3	0.5	0.4
chr2L	1152189	1152190	capt	0.2	0.6	0.4
chr2L	1152283	1152284	capt	0.3	0.4	0.35
chr2L	11523323	11523324	CG31705	3.8	3.5	3.65
chr2L	11523324	11523325	CG31705	9.4	3.3	6.35
chr2L	11523441	11523442	CG31705	0.1	0.25	0.18
chr2L	11523729	11523730	CG31705	0.08	0.12	0.1
chr2L	11524033	11524034	CG31705	0	0.1	0.05
chr2L	11524349	11524350	CG31705	0	0.1	0.05
chr2L	11524914	11524915	CG31705	0.1	0.1	0.1
chr2L	11524935	11524936	CG31705	0.1	0.1	0.1
chr2L	11525020	11525021	CG31705	0.15	0.15	0.15
chr2L	1152510	1152511	capt	0.3	0.4	0.35
chr2L	11525271	11525272	CG31705	0.1	0.1	0.1
chr2L	11525471	11525472	CG31705	0.15	0.2	0.18
chr2L	1152552	1152553	capt	0.3	0.5	0.4
chr2L	1152781	1152782	capt	0.4	0.6	0.5
chr2L	11528167	11528168	CG31705	0.3	0.2	0.25
chr2L	1152873	1152874	capt	0.7	0.8	0.75
chr2L	1152931	1152932	capt	1.3	0.8	1.05
chr2L	1152984	1152985	capt	0.6	0.7	0.65
chr2L	11529875	11529876	CG31706	0.12	0.1	0.11
chr2L	11529888	11529889	CG31706	0.1	0.1	0.1
chr2L	11530045	11530046	CG31706	0.1	0.1	0.1
chr2L	11530134	11530135	CG31706	0.1	0.1	0.1
chr2L	11530660	11530661	CG31706	0.1	0.1	0.1
chr2L	11530689	11530690	CG31706	0.1	0.1	0.1
chr2L	11530781	11530782	CG31706	0.25	0.1	0.18
chr2L	1153217	1153218	capt	0.3	0.4	0.35
chr2L	1153232	1153233	capt	0.3	0.4	0.35
chr2L	1154301	1154302	capt	0.8	1.7	1.25
chr2L	1154593	1154594	capt	0.9	1	0.95
chr2L	1154611	1154612	capt	0.9	1	0.95
chr2L	1154648	1154649	capt	0.8	0.9	0.85
chr2L	1154653	1154654	capt	0.78	1.7	1.24
chr2L	1154719	1154720	capt	0.8	0.8	0.8
chr2L	1154764	1154765	capt	0.7	0.8	0.75
chr2L	1154773	1154774	capt	0.8	0.9	0.85
chr2L	1155130	1155131	capt	1.7	2	1.85
chr2L	1155850	1155851	capt	1	1.2	1.1
chr2L	11582165	11582166	kek2	1.3	1.8	1.55
chr2L	11582255	11582256	kek2	1.3	2.1	1.7
chr2L	11582410	11582411	kek2	1.3	2.1	1.7
chr2L	11582886	11582887	kek2	3.3	3.1	3.2
chr2L	11583076	11583077	kek2	2.9	1.8	2.35
chr2L	1158807	1158808	CR43767	0.8	1	0.9
chr2L	1158854	1158855	Tango14	1.1	1.3	1.2
chr2L	1158867	1158868	CR43767	0.6	0.8	0.7
chr2L	1159051	1159052	CR43767	0.9	2.3	1.6
chr2L	1159302	1159303	Tango14	0.7	1.1	0.9
chr2L	1159933	1159934	Tango14	1.7	3.8	2.75
chr2L	1159969	1159970	Tango14	1.6	1.3	1.45
chr2L	1160083	1160084	Tango14	3.38	17.4	10.39
chr2L	1160094	1160095	Tango14	1.8	2.8	2.3
chr2L	1160098	1160099	Tango14	8.5	5.6	7.05
chr2L	1160504	1160505	CG5080	0.5	0.5	0.5
chr2L	1160558	1160559	CG5080	0.5	0.4	0.45
chr2L	1160687	1160688	CG5080	0.5	0.4	0.45
chr2L	1160854	1160855	CG5080	0.5	0.5	0.5
chr2L	1160862	1160863	CG5080	0.5	0.5	0.5
chr2L	1161196	1161197	CG5080	0.5	0.5	0.5
chr2L	1161204	1161205	CG5080	0.5	0.5	0.5
chr2L	1161547	1161548	CG5080	0.6	0.5	0.55
chr2L	1161711	1161712	CG5080	1	0.8	0.9
chr2L	1161754	1161755	CG5080	1.1	0.8	0.95
chr2L	1161948	1161949	CG5080	0.7	0.7	0.7
chr2L	1162071	1162072	CG5080	0.9	0.7	0.8
chr2L	11621309	11621310	kek2	1.3	1.5	1.4
chr2L	11621325	11621326	kek2	2.5	1.4	1.95
chr2L	11621331	11621332	kek2	1.3	1.2	1.25
chr2L	11621371	11621372	kek2	1.2	1.3	1.25
chr2L	11621469	11621470	kek2	1.2	1.5	1.35
chr2L	11621543	11621544	kek2	1.4	2	1.7
chr2L	11622437	11622438	kek2	1.5	1.3	1.4
chr2L	11622517	11622518	kek2	1.52	1.55	1.54
chr2L	11622895	11622896	kek2	1	1.4	1.2
chr2L	11623031	11623032	kek2	1	2.5	1.75
chr2L	11623084	11623085	kek2	1.1	2.1	1.6
chr2L	11623285	11623286	kek2	1.1	1.6	1.35
chr2L	11624054	11624055	kek2	1.5	1.7	1.6
chr2L	11624278	11624279	kek2	1.3	1.2	1.25
chr2L	11624711	11624712	kek2	0.8	1.1	0.95
chr2L	11625143	11625144	kek2	1.1	1.1	1.1
chr2L	11625593	11625594	kek2	0.82	0.9	0.86
chr2L	11625907	11625908	kek2	0.7	0.7	0.7
chr2L	11626027	11626028	kek2	1.8	1.3	1.55
chr2L	11626122	11626123	kek2	2.4	1.4	1.9
chr2L	11626433	11626434	kek2	1.1	0.8	0.95
chr2L	11626635	11626636	kek2	1.1	1.1	1.1
chr2L	1163140	1163141	CG5080	1.02	1.3	1.16
chr2L	1166779	1166780	CG14341	1	1.8	1.4
chr2L	1167015	1167016	CG14341	2.35	1.23	1.79
[truncated: 115,454 more rows]

## Sheet: Del Lsm Brain
chrom	start	end	Gene	Replicate 1 Edit Percentage	Replicate 2 Edit Percentage	Average Edit Percentage
chr2L	10004538	10004539	CG4747	1.3	2.9	2.1
chr2L	10006043	10006044	CG4747	2.7	2.6	2.65
chr2L	10007333	10007334	CG4747	2.7	5.3	4
chr2L	10008050	10008051	CG4747	5.3	7.1	6.2
chr2L	10008338	10008339	CG4747	1.4	2.1	1.75
chr2L	10008348	10008349	CG4747	1.5	1.5	1.5
chr2L	10009446	10009447	Trp1	0.9	1.3	1.1
chr2L	10010960	10010961	Trp1	1.6	0.9	1.25
chr2L	10012405	10012406	Trp1	0.7	0.6	0.65
chr2L	10012613	10012614	Trp1	1.3	3.7	2.5
chr2L	10012775	10012776	Trp1	3	3.5	3.25
chr2L	10012938	10012939	Trp1	1.1	0.6	0.85
chr2L	10065081	10065082	CG44153	2.9	5.9	4.4
chr2L	10065268	10065269	CG44153	6.3	4.8	5.55
chr2L	1008393	1008394	IA-2	1.7	1.8	1.75
chr2L	1008427	1008428	IA-2	0.7	0.8	0.75
chr2L	1008439	1008440	IA-2	7.08	3.27	5.17
chr2L	1008440	1008441	IA-2	1.1	2.4	1.75
chr2L	1008468	1008469	IA-2	3.3	1.1	2.2
chr2L	1008479	1008480	IA-2	0.4	0.4	0.4
chr2L	1008525	1008526	IA-2	2.03	2.98	2.5
chr2L	1008583	1008584	IA-2	1.4	2.3	1.85
chr2L	1008621	1008622	IA-2	0.4	0.52	0.46
chr2L	1008639	1008640	IA-2	3.85	5.8	4.83
chr2L	1008687	1008688	IA-2	13.6	12.2	12.9
chr2L	1008688	1008689	IA-2	9.7	7.7	8.7
chr2L	1008689	1008690	IA-2	4.2	9.3	6.75
chr2L	1008690	1008691	IA-2	1	0.3	0.65
chr2L	1008691	1008692	IA-2	1	0.2	0.6
chr2L	1008692	1008693	IA-2	1.15	1.1	1.12
chr2L	1008715	1008716	IA-2	0.3	0.4	0.35
chr2L	1008735	1008736	IA-2	0.9	0.8	0.85
chr2L	1008737	1008738	IA-2	1.6	0.8	1.2
chr2L	1008752	1008753	IA-2	1.7	1.2	1.45
chr2L	1008754	1008755	IA-2	1.1	0.3	0.7
chr2L	1008759	1008760	IA-2	1.8	1.8	1.8
chr2L	1008766	1008767	IA-2	0.4	0.4	0.4
chr2L	1008773	1008774	IA-2	0.4	0.4	0.4
chr2L	1008826	1008827	IA-2	2.6	1.3	1.95
chr2L	1008914	1008915	IA-2	0.4	0.6	0.5
chr2L	1008982	1008983	IA-2	0.4	0.3	0.35
chr2L	1008993	1008994	IA-2	5.1	4.5	4.8
chr2L	1009009	1009010	IA-2	4.75	0.7	2.73
chr2L	1009080	1009081	IA-2	13.8	8.3	11.05
chr2L	1009081	1009082	IA-2	11.8	2.3	7.05
chr2L	1009138	1009139	IA-2	1.7	1.25	1.48
chr2L	1009175	1009176	IA-2	0.3	0.6	0.45
chr2L	1009189	1009190	IA-2	0.6	1.2	0.9
chr2L	1009218	1009219	IA-2	0.78	0.3	0.54
chr2L	1009219	1009220	IA-2	0.4	0.4	0.4
chr2L	1009220	1009221	IA-2	2.7	2.4	2.55
chr2L	1009382	1009383	IA-2	0.75	0.85	0.8
chr2L	1009388	1009389	IA-2	0.3	0.3	0.3
chr2L	1009403	1009404	IA-2	0.57	0.3	0.43
chr2L	1009414	1009415	IA-2	1.62	0.45	1.04
chr2L	1009424	1009425	IA-2	2.4	3.3	2.85
chr2L	1009440	1009441	IA-2	34.9	38.7	36.8
chr2L	1009444	1009445	IA-2	0.85	0.7	0.77
chr2L	1009463	1009464	IA-2	1.9	0.45	1.18
chr2L	1009605	1009606	IA-2	0.78	0.6	0.69
chr2L	1009618	1009619	IA-2	0.2	0.3	0.25
chr2L	1009683	1009684	IA-2	0.5	0.3	0.4
chr2L	1009690	1009691	IA-2	0.75	0.3	0.52
chr2L	1009695	1009696	IA-2	0.3	0.4	0.35
chr2L	1009732	1009733	IA-2	1.1	0.6	0.85
chr2L	1009788	1009789	IA-2	0.6	1	0.8
chr2L	1009818	1009819	IA-2	0.4	0.4	0.4
chr2L	1009833	1009834	IA-2	0.1	0.5	0.3
chr2L	1009834	1009835	IA-2	0.4	0.3	0.35
chr2L	1009839	1009840	IA-2	1	0.5	0.75
chr2L	1009853	1009854	IA-2	0.35	0.18	0.26
chr2L	1009860	1009861	IA-2	0.12	0.2	0.16
chr2L	1009880	1009881	IA-2	0.1	0.2	0.15
chr2L	1009900	1009901	IA-2	0.1	0.1	0.1
chr2L	1009906	1009907	IA-2	0.1	0.2	0.15
chr2L	1009914	1009915	IA-2	0.1	0.1	0.1
chr2L	1009915	1009916	IA-2	0.6	0.4	0.5
chr2L	1009932	1009933	IA-2	0.3	0.4	0.35
chr2L	1009937	1009938	IA-2	0.2	0.1	0.15
chr2L	1009945	1009946	IA-2	0.2	0.1	0.15
chr2L	1009949	1009950	IA-2	0.1	0.1	0.1
chr2L	1009955	1009956	IA-2	0.28	0.3	0.29
chr2L	1009973	1009974	IA-2	7.43	5.65	6.54
chr2L	1009974	1009975	IA-2	0.4	0.3	0.35
chr2L	1009993	1009994	IA-2	0.1	0.1	0.1
chr2L	1010005	1010006	IA-2	0.1	0.3	0.2
chr2L	1010011	1010012	IA-2	0.9	0.65	0.78
chr2L	1010018	1010019	IA-2	0.18	0.3	0.24
chr2L	1010043	1010044	IA-2	0.1	0.1	0.1
chr2L	1010047	1010048	IA-2	0.3	0.2	0.25
chr2L	1010052	1010053	IA-2	0.25	0.5	0.38
chr2L	1010053	1010054	IA-2	0.65	0.45	0.55
chr2L	1010054	1010055	IA-2	0.6	0.5	0.55
chr2L	1010058	1010059	IA-2	1.7	1.9	1.8
chr2L	1010060	1010061	IA-2	2.3	1.2	1.75
chr2L	1010062	1010063	IA-2	3.6	4.22	3.91
chr2L	1010070	1010071	IA-2	0.7	0.2	0.45
chr2L	1010072	1010073	IA-2	1.35	0.65	1
chr2L	1010074	1010075	IA-2	0.45	0.75	0.6
chr2L	1010094	1010095	IA-2	0.25	0.25	0.25
chr2L	1010096	1010097	IA-2	0.2	0.2	0.2
chr2L	1010098	1010099	IA-2	0.38	0.12	0.25
chr2L	1010125	1010126	IA-2	0	0	0
chr2L	1010151	1010152	IA-2	0.1	0.1	0.1
chr2L	1010271	1010272	IA-2	0	0	0
chr2L	1010355	1010356	IA-2	0.1	0.1	0.1
chr2L	1010424	1010425	IA-2	0.15	0.3	0.22
chr2L	1010435	1010436	IA-2	0.1	0.1	0.1
chr2L	1010469	1010470	IA-2	0.3	0.5	0.4
chr2L	1010470	1010471	IA-2	0.1	0.1	0.1
chr2L	1010504	1010505	IA-2	0.7	0.5	0.6
chr2L	1010516	1010517	IA-2	0.8	1.65	1.23
chr2L	1010609	1010610	IA-2	0.28	0.38	0.33
chr2L	1010640	1010641	IA-2	0.2	0.2	0.2
chr2L	1011344	1011345	IA-2	0.2	0.1	0.15
chr2L	1011352	1011353	IA-2	0.15	0.1	0.12
chr2L	1011355	1011356	IA-2	0.2	0.2	0.2
chr2L	1011372	1011373	IA-2	0.1	0.18	0.14
chr2L	1011389	1011390	IA-2	0.2	0.18	0.19
chr2L	1011390	1011391	IA-2	0.15	0.35	0.25
chr2L	1011416	1011417	IA-2	0.6	0.2	0.4
chr2L	1011427	1011428	IA-2	2.77	2.85	2.81
chr2L	1011482	1011483	IA-2	22.7	18.9	20.8
chr2L	1011486	1011487	IA-2	1.02	0.7	0.86
chr2L	1011490	1011491	IA-2	0.7	0.3	0.5
chr2L	1011495	1011496	IA-2	0.4	0.1	0.25
chr2L	1011502	1011503	IA-2	0.2	0.2	0.2
chr2L	1011505	1011506	IA-2	0.3	0.5	0.4
chr2L	1011511	1011512	IA-2	1.02	0.48	0.75
chr2L	1011515	1011516	IA-2	0.2	0.2	0.2
chr2L	1011517	1011518	IA-2	0.5	0.2	0.35
chr2L	1011542	1011543	IA-2	4.3	1.52	2.91
chr2L	1011544	1011545	IA-2	2.1	2.4	2.25
chr2L	1011546	1011547	IA-2	1.75	1.68	1.71
chr2L	1011548	1011549	IA-2	1	0.4	0.7
chr2L	1011550	1011551	IA-2	2.8	4.4	3.6
chr2L	1011554	1011555	IA-2	0.2	0.7	0.45
chr2L	1011588	1011589	IA-2	0.1	0.1	0.1
chr2L	1011604	1011605	IA-2	0.1	0.2	0.15
chr2L	1011623	1011624	IA-2	0.1	0.1	0.1
chr2L	1011631	1011632	IA-2	0.35	0.25	0.3
chr2L	1011637	1011638	IA-2	3.9	3.02	3.46
chr2L	1011651	1011652	IA-2	0.1	0.1	0.1
chr2L	1011656	1011657	IA-2	0.25	0.25	0.25
chr2L	1011657	1011658	IA-2	0.1	0	0.05
chr2L	1011664	1011665	IA-2	0.05	0.1	0.08
chr2L	1011668	1011669	IA-2	0.2	0.1	0.15
chr2L	1011695	1011696	IA-2	0	0.1	0.05
chr2L	1011705	1011706	IA-2	1.1	0.9	1
chr2L	1011709	1011710	IA-2	0	0.3	0.15
chr2L	1011711	1011712	IA-2	0.2	0.3	0.25
chr2L	1011727	1011728	IA-2	0.25	0.25	0.25
chr2L	1011728	1011729	IA-2	0.05	0.15	0.1
chr2L	1011729	1011730	IA-2	2.25	1.23	1.74
chr2L	1011731	1011732	IA-2	0.8	0.5	0.65
chr2L	1011743	1011744	IA-2	0.92	0.48	0.7
chr2L	1011745	1011746	IA-2	0.18	0.2	0.19
chr2L	1011753	1011754	IA-2	1.48	0.75	1.12
chr2L	1011757	1011758	IA-2	0.1	0.1	0.1
chr2L	1011758	1011759	IA-2	0.3	0.2	0.25
chr2L	1011767	1011768	IA-2	0.18	0.1	0.14
chr2L	1011774	1011775	IA-2	0.4	0.2	0.3
chr2L	1011779	1011780	IA-2	4.3	3.7	4
chr2L	1011780	1011781	IA-2	2.5	1.7	2.1
chr2L	1011782	1011783	IA-2	0.1	0.1	0.1
chr2L	1011783	1011784	IA-2	0.1	0.2	0.15
chr2L	1011784	1011785	IA-2	0.52	0.5	0.51
chr2L	1011796	1011797	IA-2	0	0.1	0.05
chr2L	1011806	1011807	IA-2	0.02	0.12	0.07
chr2L	1011807	1011808	IA-2	0.1	0.08	0.09
chr2L	1011812	1011813	IA-2	0.2	0.2	0.2
chr2L	1011813	1011814	IA-2	0.4	0.3	0.35
chr2L	1011827	1011828	IA-2	0.5	0.5	0.5
chr2L	1011828	1011829	IA-2	0.1	0	0.05
chr2L	1011830	1011831	IA-2	2	0.95	1.48
chr2L	1011840	1011841	IA-2	0.55	0.12	0.34
chr2L	1011845	1011846	IA-2	0.1	0.02	0.06
chr2L	1011848	1011849	IA-2	0.1	0.3	0.2
chr2L	1011852	1011853	IA-2	0.2	0	0.1
chr2L	1011853	1011854	IA-2	0.4	0.1	0.25
chr2L	1011868	1011869	IA-2	0.1	0.02	0.06
chr2L	1011873	1011874	IA-2	1.18	0.85	1.01
chr2L	1011876	1011877	IA-2	0.1	0.1	0.1
chr2L	1011887	1011888	IA-2	0.1	0.1	0.1
chr2L	1011896	1011897	IA-2	0.1	0.1	0.1
chr2L	1011900	1011901	IA-2	0.3	0.3	0.3
chr2L	1011903	1011904	IA-2	0.3	0.2	0.25
chr2L	1011909	1011910	IA-2	0.1	0.1	0.1
chr2L	1011910	1011911	IA-2	0.4	0.2	0.3
chr2L	1011915	1011916	IA-2	0.1	0.1	0.1
chr2L	1011917	1011918	IA-2	0.12	0.35	0.24
chr2L	1011971	1011972	IA-2	2.9	2.7	2.8
chr2L	1012018	1012019	IA-2	0.7	0.6	0.65
chr2L	1012024	1012025	IA-2	1.07	0.45	0.76
chr2L	1012109	1012110	IA-2	4.05	2.73	3.39
chr2L	1012116	1012117	IA-2	0.12	0.1	0.11
chr2L	1012134	1012135	IA-2	0.4	0.3	0.35
chr2L	1012143	1012144	IA-2	0.2	0.2	0.2
chr2L	1012154	1012155	IA-2	0.1	0.1	0.1
chr2L	1012166	1012167	IA-2	0.2	0.1	0.15
chr2L	1012167	1012168	IA-2	0.2	0.1	0.15
chr2L	1012181	1012182	IA-2	0.1	0.1	0.1
chr2L	1012184	1012185	IA-2	0.62	0.55	0.58
chr2L	1012189	1012190	IA-2	0.1	0.2	0.15
chr2L	1012192	1012193	IA-2	0.1	0.4	0.25
chr2L	1012203	1012204	IA-2	0.2	0	0.1
chr2L	1012213	1012214	IA-2	8.3	6.8	7.55
chr2L	1012218	1012219	IA-2	2.2	2.9	2.55
chr2L	1012222	1012223	IA-2	0.1	0	0.05
chr2L	1012225	1012226	IA-2	0.2	0	0.1
chr2L	1012227	1012228	IA-2	0.1	0	0.05
chr2L	1012232	1012233	IA-2	0.5	0.2	0.35
chr2L	1012234	1012235	IA-2	0.1	0.2	0.15
chr2L	1012237	1012238	IA-2	0.4	0.2	0.3
chr2L	1012238	1012239	IA-2	1.05	0.62	0.84
chr2L	1012242	1012243	IA-2	0.43	0.2	0.32
chr2L	1012248	1012249	IA-2	0.3	0.5	0.4
chr2L	1012251	1012252	IA-2	0.6	0.4	0.5
chr2L	1012255	1012256	IA-2	6.8	5.5	6.15
chr2L	1012261	1012262	IA-2	0.1	0.1	0.1
chr2L	1012268	1012269	IA-2	0.2	0.2	0.2
chr2L	1012270	1012271	IA-2	0.1	0.2	0.15
chr2L	1012287	1012288	IA-2	0.4	0.1	0.25
chr2L	1012294	1012295	IA-2	0.5	0.1	0.3
chr2L	1012295	1012296	IA-2	0.1	0.1	0.1
chr2L	1012297	1012298	IA-2	3.9	1.05	2.48
chr2L	1012298	1012299	IA-2	0.2	0.6	0.4
chr2L	1012299	1012300	IA-2	0.2	0.1	0.15
chr2L	1012303	1012304	IA-2	0.5	0.2	0.35
chr2L	1012568	1012569	IA-2	0.1	0.1	0.1
chr2L	1012580	1012581	IA-2	0.1	0	0.05
chr2L	1012592	1012593	IA-2	0.32	0.1	0.21
chr2L	1012624	1012625	IA-2	0.6	0.25	0.42
chr2L	1012634	1012635	IA-2	1.32	0.95	1.14
chr2L	1012671	1012672	IA-2	0.2	0.1	0.15
chr2L	1012681	1012682	IA-2	0.2	0.1	0.15
chr2L	1012684	1012685	IA-2	0.2	0.1	0.15
chr2L	1012695	1012696	IA-2	0.5	0.4	0.45
chr2L	1012698	1012699	IA-2	0.2	0.2	0.2
chr2L	1012849	1012850	IA-2	0.5	0.3	0.4
chr2L	1012858	1012859	IA-2	0.2	0.1	0.15
chr2L	1012871	1012872	IA-2	0.4	0.5	0.45
chr2L	1012886	1012887	IA-2	0.2	0.2	0.2
chr2L	1012927	1012928	IA-2	0.45	0.5	0.48
chr2L	101309	101310	Zir	1.6	1.55	1.58
chr2L	1013108	1013109	IA-2	0.32	0.25	0.29
chr2L	1013124	1013125	IA-2	0.77	1.12	0.94
chr2L	1013457	1013458	IA-2	0.4	0.18	0.29
chr2L	1013469	1013470	IA-2	0	0.18	0.09
chr2L	1013513	1013514	IA-2	6.2	3.7	4.95
chr2L	1013522	1013523	IA-2	0.1	0.5	0.3
chr2L	1013547	1013548	IA-2	0.2	0.5	0.35
chr2L	1013552	1013553	IA-2	0.1	0.2	0.15
chr2L	1013575	1013576	IA-2	0.2	0.3	0.25
chr2L	1013582	1013583	IA-2	0.2	0.2	0.2
chr2L	1013588	1013589	IA-2	0.1	0.5	0.3
chr2L	1014660	1014661	IA-2	0	0.1	0.05
chr2L	1014711	1014712	IA-2	1.75	1.4	1.57
chr2L	1015430	1015431	IA-2	0.52	0.62	0.57
chr2L	1017321	1017322	IA-2	0.1	0.45	0.28
chr2L	10199677	10199678	Ripalpha	3.7	3.2	3.45
chr2L	10200475	10200476	Ripalpha	3.2	4.8	4
chr2L	10201121	10201122	RpL7	1.8	5.8	3.8
chr2L	10201434	10201435	RpL7	0.48	0.48	0.48
chr2L	10202126	10202127	RpL7	0.4	0.2	0.3
chr2L	10202589	10202590	CG34159	2.3	1.3	1.8
chr2L	10203591	10203592	CG34159	2.4	2	2.2
chr2L	10204859	10204860	CG5734	2.5	1.4	1.95
chr2L	10205063	10205064	CG5734	1.9	0.9	1.4
chr2L	10205163	10205164	CG5734	1.3	1	1.15
chr2L	10205680	10205681	CG5734	1.7	1.3	1.5
chr2L	10213987	10213988	Npc1a	3.58	1.43	2.5
chr2L	10214024	10214025	Npc1a	1.1	0.8	0.95
chr2L	10214403	10214404	Npc1a	0.7	1.6	1.15
chr2L	10214829	10214830	Npc1a	1.2	2.5	1.85
chr2L	10215264	10215265	Npc1a	1.2	1.3	1.25
chr2L	10216416	10216417	Npc1a	1.9	2.6	2.25
chr2L	10220819	10220820	Npc1a	1.7	10	5.85
chr2L	10224767	10224768	CG5708	2.1	1	1.55
chr2L	10225369	10225370	CG5708	1.07	0.7	0.88
chr2L	10225725	10225726	CG5708	1.2	1.1	1.15
chr2L	10228490	10228491	CG5694	2.2	3.7	2.95
chr2L	10228509	10228510	CG5694	1.8	3	2.4
chr2L	10228841	10228842	CG5694	3	8	5.5
chr2L	10229116	10229117	CG5694	3.6	4.5	4.05
chr2L	10229124	10229125	CG5694	2.4	3.8	3.1
chr2L	10229483	10229484	CG5694	7.1	8.3	7.7
chr2L	10232618	10232619	eEF1delta	3.4	2.1	2.75
chr2L	10234000	10234001	eEF1delta	1.2	0.7	0.95
chr2L	10239563	10239564	me31B	1.1	1.4	1.25
chr2L	10241400	10241401	me31B	1.1	0.6	0.85
chr2L	10241438	10241439	me31B	1	0.6	0.8
chr2L	10242084	10242085	me31B	1.5	1.4	1.45
chr2L	10242694	10242695	chico	5.7	2.1	3.9
chr2L	10243041	10243042	CR44995	3.4	5.9	4.65
chr2L	10243709	10243710	CR44995	3	7.1	5.05
chr2L	10244020	10244021	chico	2.9	10	6.45
chr2L	10244278	10244279	chico	10	7.7	8.85
chr2L	10247711	10247712	bsk	0.7	0.38	0.54
chr2L	10247946	10247947	bsk	0.9	0.6	0.75
chr2L	10248127	10248128	bsk	0.5	0.48	0.49
chr2L	10248218	10248219	bsk	4.32	4.28	4.3
chr2L	10248849	10248850	bsk	0.62	0.6	0.61
chr2L	10248850	10248851	bsk	0.6	0.6	0.6
chr2L	10249102	10249103	bsk	0.5	1.2	0.85
chr2L	10249105	10249106	bsk	5.7	5.6	5.65
chr2L	10252834	10252835	Ror	4.2	11.1	7.65
chr2L	10254006	10254007	Ror	3.8	3.4	3.6
chr2L	10254237	10254238	Ror	4.2	4.5	4.35
chr2L	10254783	10254784	CG5676	0.9	0.3	0.6
chr2L	10254829	10254830	CG5676	0.9	3.2	2.05
chr2L	10254830	10254831	CG5676	0.4	0.7	0.55
chr2L	10255133	10255134	CG5676	0.5	0.2	0.35
chr2L	10255172	10255173	CG5676	0.5	0.2	0.35
chr2L	10255755	10255756	CG5676	1.1	0.3	0.7
chr2L	10257424	10257425	Pten	3.1	3	3.05
chr2L	10261923	10261924	Rsf1	1	2.9	1.95
chr2L	10261972	10261973	Rsf1	2.1	2.1	2.1
chr2L	10262076	10262077	Rsf1	1.3	0.7	1
chr2L	10262133	10262134	Rsf1	1.1	2.5	1.8
chr2L	10262137	10262138	Rsf1	1.1	1.4	1.25
chr2L	10262153	10262154	Rsf1	1.4	0.8	1.1
chr2L	10262481	10262482	Rsf1	0.9	1.2	1.05
chr2L	10262526	10262527	Rsf1	1.6	1.3	1.45
chr2L	10265028	10265029	CG18619	0.9	0.3	0.6
chr2L	10265493	10265494	Mob3	2.5	1.9	2.2
chr2L	10265552	10265553	Mob3	1.9	1.7	1.8
chr2L	10266036	10266037	Mob3	1.7	0.9	1.3
chr2L	10268440	10268441	CG4953	10	5.6	7.8
chr2L	10269221	10269222	CG4957	3.6	2.1	2.85
chr2L	10272534	10272535	Utx	10	23.5	16.75
chr2L	10272535	10272536	Utx	10	16.7	13.35
chr2L	10282069	10282070	CG5604	0.7	0.5	0.6
chr2L	10282345	10282346	CG5604	1	1	1
chr2L	10282356	10282357	CG5604	1.57	1.7	1.64
chr2L	10283310	10283311	CG5604	2.08	8	5.04
chr2L	10283395	10283396	CG5604	0.6	1.3	0.95
chr2L	10283880	10283881	CG5604	2.3	2.1	2.2
chr2L	10286032	10286033	CG5604	4.7	25	14.85
chr2L	10288822	10288823	CG5604	1.2	33.3	17.25
chr2L	10296640	10296641	CYLD	1.3	1.7	1.5
chr2L	10299155	10299156	CYLD	3.2	14.3	8.75
chr2L	10308362	10308363	Cdk5alpha	0.3	0.6	0.45
chr2L	10308651	10308652	Cdk5alpha	0.77	0.8	0.78
chr2L	10308705	10308706	Cdk5alpha	0.82	0.38	0.6
chr2L	10309384	10309385	Cdk5alpha	0.4	0.5	0.45
chr2L	10309412	10309413	Cdk5alpha	0.4	1.4	0.9
chr2L	10309837	10309838	Cdk5alpha	0.5	0.7	0.6
chr2L	10310041	10310042	Cdk5alpha	0.55	0.7	0.62
chr2L	10310261	10310262	Cdk5alpha	0.4	0.7	0.55
chr2L	10310579	10310580	Cdk5alpha	4.48	4.33	4.41
chr2L	10311285	10311286	l(2)SH0834	6.7	1.8	4.25
chr2L	10311380	10311381	l(2)SH0834	2.5	1	1.75
chr2L	10312411	10312412	CG5384	1.7	1.1	1.4
chr2L	10312825	10312826	CG5384	1.8	2.7	2.25
chr2L	10317040	10317041	CG4972	1.3	3.1	2.2
chr2L	10317295	10317296	CG4972	11.1	19.5	15.3
chr2L	10328995	10328996	CG5375	1.1	2.7	1.9
chr2L	10329382	10329383	CG5375	1.5	1.1	1.3
chr2L	10329475	10329476	CG5375	6	9.3	7.65
chr2L	10329527	10329528	CG5375	1	0.8	0.9
chr2L	10329575	10329576	CG5375	1.4	1.1	1.25
chr2L	10332199	10332200	CG5037	10.1	7.5	8.8
chr2L	10332899	10332900	CG5037	2.08	3.05	2.56
chr2L	10332920	10332921	CG5037	1.1	1.4	1.25
chr2L	10337382	10337383	GATAd	2.6	2.7	2.65
chr2L	10337405	10337406	GATAd	3.8	2.4	3.1
chr2L	10338049	10338050	GATAd	2.6	4.3	3.45
chr2L	1033860	1033861	IA-2	0.1	1	0.55
chr2L	10340747	10340748	SamDC	17.9	11.5	14.7
chr2L	10342156	10342157	CG31715	1.3	1.1	1.2
chr2L	10342201	10342202	CG31715	1.1	2.3	1.7
chr2L	10343949	10343950	Sps2	2.4	1.1	1.75
chr2L	10346580	10346581	CG5022	3.8	9.1	6.45
chr2L	10347410	10347411	CG5022	6.3	3.4	4.85
chr2L	10357048	10357049	CG5045	2.3	2.3	2.3
chr2L	10357979	10357980	CG5045	4.8	2.4	3.6
chr2L	10358568	10358569	Cand1	3.6	2.9	3.25
chr2L	10358760	10358761	Cand1	3.7	7	5.35
chr2L	10367397	10367398	CG5056	4.2	2.4	3.3
chr2L	10367532	10367533	CG5056	3	2.4	2.7
chr2L	10368109	10368110	rho-5	14.6	8.1	11.35
chr2L	10368297	10368298	rho-5	1.3	1.1	1.2
chr2L	10368360	10368361	rho-5	1.5	1.2	1.35
chr2L	10368377	10368378	rho-5	1.5	1.5	1.5
chr2L	10368667	10368668	rho-5	3.8	4.7	4.25
chr2L	10371705	10371706	rho-5	2	5.9	3.95
chr2L	10373857	10373858	CG33303	1.5	33.3	17.4
chr2L	10373857	10373858	rho-5	1.5	33.3	17.4
chr2L	10374569	10374570	CG33303	8.3	2.4	5.35
chr2L	10378365	10378366	dpr19	1.7	1.5	1.6
chr2L	10378662	10378663	dpr19	3	4.88	3.94
chr2L	10378770	10378771	dpr19	2.2	5.1	3.65
chr2L	10378946	10378947	dpr19	0.9	1.4	1.15
chr2L	10379129	10379130	dpr19	0.6	1.32	0.96
chr2L	10379216	10379217	dpr19	0.8	1.2	1
chr2L	10379431	10379432	dpr19	1.3	1.3	1.3
chr2L	10379636	10379637	dpr19	1.9	0.8	1.35
chr2L	10379676	10379677	dpr19	1.6	1	1.3
chr2L	10379678	10379679	dpr19	1.5	1	1.25
chr2L	10379698	10379699	dpr19	1.4	0.7	1.05
chr2L	10379735	10379736	dpr19	1.3	2.6	1.95
chr2L	10379845	10379846	dpr19	23.7	14.5	19.1
chr2L	10380746	10380747	gny	33.3	25	29.15
chr2L	10386771	10386772	mRpS7	1	0.6	0.8
chr2L	10388416	10388417	da	2.9	7.1	5
chr2L	10390361	10390362	da	2.3	12.5	7.4
chr2L	10391966	10391967	da	1.6	4.88	3.24
chr2L	10392135	10392136	da	2	2.4	2.2
chr2L	10394232	10394233	Mdh1	0.4	0.2	0.3
chr2L	10401850	10401851	Cnot4	1	3	2
chr2L	10401969	10401970	Cnot4	0.7	1	0.85
chr2L	10402100	10402101	Cnot4	4.97	2.5	3.73
chr2L	10402303	10402304	Cnot4	1.3	5.6	3.45
chr2L	10402832	10402833	Cnot4	1.5	1.7	1.6
chr2L	10402900	10402901	Cnot4	2.1	1.3	1.7
chr2L	10402901	10402902	Cnot4	4.3	4.1	4.2
chr2L	10402910	10402911	Cnot4	10.85	12.75	11.8
chr2L	10402931	10402932	Cnot4	7.1	7.4	7.25
chr2L	10404722	10404723	CG17768	4	2.7	3.35
chr2L	10404722	10404723	LSm-4	4	2.7	3.35
chr2L	10408367	10408368	Ip259	22.2	18.8	20.5
chr2L	10408367	10408368	RpS27A	22.2	18.8	20.5
chr2L	10408383	10408384	Ip259	0.2	0.2	0.2
chr2L	10408383	10408384	RpS27A	0.2	0.2	0.2
chr2L	10408916	10408917	Ip259	0.5	0.6	0.55
chr2L	10408916	10408917	RpS27A	0.5	0.6	0.55
chr2L	10408919	10408920	Ip259	2.05	2.5	2.27
chr2L	10408919	10408920	RpS27A	2.05	2.5	2.27
chr2L	10408920	10408921	Ip259	5.52	6	5.76
chr2L	10408920	10408921	RpS27A	5.52	6	5.76
chr2L	10409187	10409188	Ip259	0.25	0.3	0.28
chr2L	10409187	10409188	RpS27A	0.25	0.3	0.28
chr2L	10409571	10409572	Ip259	4.1	0.8	2.45
chr2L	10409571	10409572	RpS27A	4.1	0.8	2.45
chr2L	10410910	10410911	CG5355	2.6	1.9	2.25
chr2L	10423826	10423827	CG5168	2.6	2.6	2.6
chr2L	10425308	10425309	CG5168	1.4	0.9	1.15
chr2L	10426529	10426530	SmB	1.6	0.8	1.2
chr2L	10428147	10428148	KdelR	12.5	3.3	7.9
chr2L	10428298	10428299	KdelR	1.4	2.2	1.8
chr2L	10431870	10431871	TfIIB	5.3	3.2	4.25
chr2L	10432344	10432345	TfIIB	2.2	1.3	1.75
chr2L	10432745	10432746	CG5337	1.6	0.9	1.25
chr2L	10432755	10432756	TfIIB	2.6	0.8	1.7
chr2L	10432823	10432824	TfIIB	1	0.6	0.8
chr2L	10432825	10432826	CG5337	3.1	1.2	2.15
chr2L	10432843	10432844	TfIIB	0.9	0.6	0.75
chr2L	10432927	10432928	TfIIB	1.4	2.5	1.95
chr2L	10432940	10432941	TfIIB	1.7	3.1	2.4
chr2L	10433155	10433156	CG5337	1.5	1	1.25
chr2L	10433648	10433649	CG5337	1.1	1	1.05
chr2L	10434140	10434141	CG5337	1	1.8	1.4
chr2L	10434857	10434858	CG5337	0.9	3.3	2.1
chr2L	10435227	10435228	CG5337	1.9	2.6	2.25
chr2L	10435240	10435241	CG5337	1.4	2.7	2.05
chr2L	10435254	10435255	CG5337	2.92	3.48	3.2
chr2L	10438629	10438630	CHIP	1.2	0.6	0.9
chr2L	104473	104474	Nhe1	2.1	2.1	2.1
chr2L	10461085	10461086	LM408	0.8	0.8	0.8
chr2L	10461378	10461379	LM408	1.4	0.5	0.95
chr2L	10461696	10461697	LM408	0.8	0.65	0.73
chr2L	1046927	1046928	IA-2	0.2	2.5	1.35
chr2L	10481417	10481418	RluA-2	6.3	16.7	11.5
chr2L	10482890	10482891	RluA-2	15.4	8.3	11.85
chr2L	10484157	10484158	Grip75	10	14.3	12.15
chr2L	10485302	10485303	Grip75	6.3	3.6	4.95
chr2L	10488948	10488949	CG6144	21.1	16.7	18.9
chr2L	10489538	10489539	CG6144	3	3.2	3.1
chr2L	10489747	10489748	CG6144	2.7	3.8	3.25
chr2L	10490009	10490010	CG6144	4.5	3.1	3.8
chr2L	10490286	10490287	CG6144	2.1	5.6	3.85
chr2L	10490294	10490295	CG6144	2.1	2.4	2.25
chr2L	10490319	10490320	CG13144	4.4	3.7	4.05
chr2L	10490332	10490333	CG6144	4.8	1.7	3.25
chr2L	10490348	10490349	CG13144	2.2	1.7	1.95
chr2L	10492701	10492702	Myo31DF	12.5	20	16.25
chr2L	10507916	10507917	CG7384	18.2	20	19.1
chr2L	10511856	10511857	CG45083	23.5	3.8	13.65
chr2L	10511856	10511857	Fatp	23.5	3.8	13.65
chr2L	1061661	1061662	S	4.3	11.1	7.7
chr2L	10627022	10627023	Trim9	3.3	13	8.15
chr2L	10627191	10627192	Trim9	13	22.2	17.6
chr2L	10627800	10627801	Trim9	4.2	4.3	4.25
chr2L	10693016	10693017	CG17108	0.3	0.2	0.25
chr2L	10693139	10693140	CG17108	0.7	0.3	0.5
chr2L	10693190	10693191	CG17108	3.3	0.8	2.05
chr2L	10693254	10693255	CG17108	0.55	0.15	0.35
chr2L	10693283	10693284	CG17108	0.35	0.1	0.22
chr2L	10729639	10729640	CG6443	2	4.2	3.1
chr2L	10731987	10731988	CG6750	4.2	5.7	4.95
chr2L	10734701	10734702	Nup107	7.1	6.7	6.9
chr2L	10735283	10735284	Nup107	18.2	7.7	12.95
chr2L	10735436	10735437	Nup107	10	8.3	9.15
chr2L	10740110	10740111	CG12299	5.1	4.4	4.75
chr2L	10741727	10741728	CG6729	7.7	16.7	12.2
chr2L	10744229	10744230	CG17124	3.5	0.9	2.2
chr2L	10744442	10744443	CG17124	1.8	1.7	1.75
chr2L	10744739	10744740	CG17124	1.3	1.6	1.45
chr2L	10745437	10745438	CG17124	1.73	1.77	1.75
chr2L	10755949	10755950	CG17124	1.2	0.9	1.05
chr2L	10762039	10762040	CG6495	0.9	2.3	1.6
chr2L	10762604	10762605	CG6495	0.9	1.5	1.2
chr2L	10762827	10762828	CG6495	1.1	2.7	1.9
chr2L	10762830	10762831	CG6495	1.1	2.1	1.6
chr2L	10762879	10762880	CG6495	1	1.7	1.35
chr2L	10763049	10763050	CG6495	1.2	1.8	1.5
chr2L	10764342	10764343	CG6495	5.17	5.08	5.12
chr2L	10764384	10764385	CG6495	0.9	0.8	0.85
chr2L	10764862	10764863	CG6495	14.6	17.2	15.9
chr2L	10765662	10765663	UbcD2	2.3	1.3	1.8
chr2L	10768437	10768438	CG6724	14.3	19	16.65
chr2L	10769773	10769774	CG6724	5.3	10	7.65
chr2L	10772884	10772885	CG31869	14.3	14.3	14.3
chr2L	1078957	1078958	ast	20	12.5	16.25
chr2L	10806029	10806030	Nos	10	15.8	12.9
chr2L	10812482	10812483	Nos	3.3	6.3	4.8
chr2L	1081581	1081582	Atg4a	4.5	8.3	6.4
chr2L	1081798	1081799	Atg4a	3.2	4.5	3.85
chr2L	1083159	1083160	Atg4a	2	1.4	1.7
chr2L	1083283	1083284	CG4629	3.3	3.8	3.55
chr2L	1083468	1083469	Atg4a	2.2	2.2	2.2
chr2L	10837920	10837921	CG6700	7.4	5.3	6.35
chr2L	10838243	10838244	CG6700	0.8	1.1	0.95
chr2L	10838920	10838921	CG6700	3.6	6.7	5.15
chr2L	10839826	10839827	CG6700	0.5	1.6	1.05
chr2L	1084241	1084242	Atg4a	1.6	2.7	2.15
chr2L	1084520	1084521	Atg4a	0.9	1.8	1.35
chr2L	10847319	10847320	porin	0.3	0.5	0.4
chr2L	10847332	10847333	porin	0.7	0.3	0.5
chr2L	10847361	10847362	porin	0.82	0.22	0.52
chr2L	10847401	10847402	porin	1.2	0.9	1.05
chr2L	10847427	10847428	porin	0.6	0.3	0.45
chr2L	10850815	10850816	CG43129	0.3	0.3	0.3
chr2L	10850822	10850823	porin	0.7	0.6	0.65
chr2L	10854676	10854677	Dnz1	4.5	3.1	3.8
chr2L	10854822	10854823	Dnz1	5.9	8	6.95
chr2L	10860172	10860173	Stam	2.4	8.3	5.35
chr2L	10861220	10861221	Stam	2.6	3.4	3
chr2L	10917265	10917266	dpr2	10.5	3.8	7.15
chr2L	10917574	10917575	dpr2	2.3	2.2	2.25
chr2L	10965242	10965243	CG33129	0.7	0.5	0.6
chr2L	10965567	10965568	CG33129	1.4	3.5	2.45
chr2L	10968726	10968727	CG33129	5.9	6.7	6.3
chr2L	10968837	10968838	CG33129	10	11.1	10.55
chr2L	10969282	10969283	CG33129	5.3	16.7	11
chr2L	10971547	10971548	YL-1	3.7	2.3	3
chr2L	10973121	10973122	CG16743	1.6	1.6	1.6
chr2L	10974805	10974806	abo	16.7	33.3	25
chr2L	10975836	10975837	l(2)06225	0.4	0.1	0.25
chr2L	10976077	10976078	l(2)06225	1.07	1.12	1.1
chr2L	10993622	10993623	CG16833	1.2	4.88	3.04
chr2L	10993623	10993624	CG16833	9.03	16.07	12.55
chr2L	11003752	11003753	RpL9	0.7	0.45	0.57
chr2L	11004037	11004038	RpL9	0.1	0.1	0.1
chr2L	11006555	11006556	Nup154	16.7	50	33.35
chr2L	1103691	1103692	mtRNApol	6.7	5.9	6.3
chr2L	1104002	1104003	mtRNApol	7.1	5.6	6.35
chr2L	1104638	1104639	mtRNApol	8.3	8.3	8.3
chr2L	11076236	11076237	AstC	1.6	2.7	2.15
chr2L	11076250	11076251	AstC	2.3	0.6	1.45
chr2L	11076272	11076273	AstC	1.2	2.3	1.75
chr2L	11076296	11076297	AstC	1.6	1	1.3
chr2L	11076380	11076381	AstC	2.2	1.4	1.8
chr2L	11076381	11076382	AstC	6.7	6.3	6.5
chr2L	11076382	11076383	AstC	7.4	3.7	5.55
chr2L	11076392	11076393	AstC	1.1	0.7	0.9
chr2L	11076403	11076404	AstC	1.2	0.5	0.85
chr2L	11076492	11076493	AstC	9.8	8	8.9
chr2L	11076592	11076593	AstC	0.9	0.4	0.65
chr2L	11076673	11076674	AstC	5.05	2.65	3.85
chr2L	11076678	11076679	AstC	2.6	2.4	2.5
chr2L	11081259	11081260	AstC	0.4	0.4	0.4
chr2L	11081266	11081267	AstC	0.4	0.2	0.3
chr2L	11090598	11090599	CG16854	5.9	6.9	6.4
chr2L	11090638	11090639	CG16854	3.6	20.8	12.2
chr2L	11095617	11095618	Ge-1	3.4	17.4	10.4
chr2L	11096643	11096644	Ge-1	2.6	3.7	3.15
chr2L	11101996	11101997	Reps	4.3	3.6	3.95
chr2L	11102127	11102128	Reps	33.3	36.4	34.85
chr2L	11109502	11109503	l(2)gd1	4.2	6.3	5.25
chr2L	11116065	11116066	CG6230	11.1	25.7	18.4
chr2L	11118251	11118252	CG6230	4.3	25	14.65
chr2L	11123244	11123245	Csl4	5	3	4
chr2L	11132677	11132678	CG4751	9.1	50	29.55
chr2L	1113314	1113315	CG14340	16.7	8.3	12.5
chr2L	11135511	11135512	CG4751	4.5	13.6	9.05
chr2L	1113666	1113667	CG14340	7.7	9.5	8.6
chr2L	11152187	11152188	CG6287	0.9	1.3	1.1
chr2L	1115521	1115522	Pino	1.3	0.8	1.05
chr2L	11156398	11156399	Ca-beta	1.8	3.9	2.85
chr2L	11156554	11156555	Ca-beta	0.8	0.9	0.85
chr2L	11156576	11156577	Ca-beta	0.8	0.8	0.8
chr2L	11157029	11157030	Ca-beta	3.3	1.7	2.5
chr2L	11157030	11157031	Ca-beta	3.6	7.3	5.45
chr2L	11157035	11157036	Ca-beta	1.7	5	3.35
chr2L	11157132	11157133	Ca-beta	1.4	5	3.2
chr2L	11157203	11157204	Ca-beta	1.5	2.5	2
chr2L	11158634	11158635	Ca-beta	0.9	5	2.95
chr2L	11165345	11165346	Ca-beta	14.3	14.3	14.3
chr2L	1116546	1116547	Pino	1.2	1.9	1.55
chr2L	11179800	11179801	CG4788	28.1	43.75	35.92
chr2L	1118684	1118685	Pino	1.8	2	1.9
chr2L	11211958	11211959	ab	3.3	4	3.65
chr2L	11259369	11259370	ab	5	16.7	10.85
chr2L	11259526	11259527	ab	11.1	40	25.55
chr2L	11278614	11278615	CG33695	10	11.1	10.55
chr2L	11282571	11282572	mre11	5	14.3	9.65
chr2L	1129454	1129455	CG4552	2.2	6.3	4.25
chr2L	113067	113068	Sam-S	0.98	0.48	0.73
chr2L	113157	113158	Sam-S	0.4	1.1	0.75
chr2L	113191	113192	Sam-S	0.6	1.2	0.9
chr2L	113249	113250	Sam-S	9.5	3.6	6.55
chr2L	113314	113315	Sam-S	0.6	1.9	1.25
chr2L	113581	113582	Sam-S	0.35	0.5	0.42
chr2L	113646	113647	Sam-S	2.25	1.2	1.73
chr2L	113694	113695	Sam-S	10.33	7.97	9.15
chr2L	1139989	1139990	CG4577	0.57	0.75	0.66
chr2L	1140179	1140180	CG4577	0.25	0.18	0.22
chr2L	1140275	1140276	CG4577	0.1	0.2	0.15
chr2L	1140359	1140360	CG4577	0.5	0.2	0.35
chr2L	1140369	1140370	CG4577	1.15	1.1	1.12
chr2L	1140460	1140461	CG4577	0.2	0.4	0.3
chr2L	1140503	1140504	CG4577	3.8	2.5	3.15
chr2L	1140552	1140553	CG4577	0.2	0.1	0.15
chr2L	1140575	1140576	CG4577	0.25	0.15	0.2
chr2L	1140666	1140667	CG4577	2.62	3.25	2.94
chr2L	1140685	1140686	CG4577	0.72	0.8	0.76
chr2L	1140698	1140699	CG4577	34.3	39.3	36.8
chr2L	1140700	1140701	CG4577	1.1	1.7	1.4
chr2L	1140702	1140703	CG4577	2.6	0.7	1.65
chr2L	1140706	1140707	CG4577	0.4	1.05	0.73
chr2L	1140712	1140713	CG4577	0.9	0.3	0.6
chr2L	1140714	1140715	CG4577	0.43	0.4	0.42
chr2L	1140720	1140721	CG4577	1.2	1.1	1.15
chr2L	1140726	1140727	CG4577	0.3	0.2	0.25
chr2L	1140728	1140729	CG4577	14.3	11.8	13.05
chr2L	1140729	1140730	CG4577	4	2.6	3.3
chr2L	1140778	1140779	CG4577	2	1.6	1.8
chr2L	1140780	1140781	CG4577	0.6	0.2	0.4
chr2L	1140805	1140806	CG4577	0.5	0.4	0.45
chr2L	1140859	1140860	CG4577	0.4	0.3	0.35
chr2L	1140872	1140873	CG4577	1.8	0.3	1.05
chr2L	1140876	1140877	CG4577	0.5	0.3	0.4
chr2L	1140885	1140886	CG4577	0.4	0.3	0.35
chr2L	1140891	1140892	CG4577	2	0.3	1.15
chr2L	114181	114182	Sam-S	0.9	0.4	0.65
chr2L	114252	114253	Sam-S	0.7	0.8	0.75
chr2L	114268	114269	Sam-S	3	1.7	2.35
chr2L	114269	114270	Sam-S	0.6	1	0.8
chr2L	114284	114285	Sam-S	0.6	0.3	0.45
chr2L	1146776	1146777	MFS3	16.7	33.3	25
chr2L	11497176	11497177	CG6488	6.7	13.3	10
chr2L	1150617	1150618	Tfb4	7.7	12.5	10.1
chr2L	1151105	1151106	Vps29	3.2	4.7	3.95
chr2L	1151232	1151233	Vps29	2.7	3.3	3
chr2L	11513324	11513325	CG6509	6.7	33.3	20
chr2L	1151754	1151755	Vps29	2	1.2	1.6
chr2L	1152255	1152256	capt	0.9	3.4	2.15
chr2L	11523324	11523325	CG31705	1.5	0.6	1.05
chr2L	11523337	11523338	CG31705	0.7	0.6	0.65
chr2L	11523421	11523422	CG31705	0.9	0.3	0.6
chr2L	11529449	11529450	CG31706	2.8	0.9	1.85
chr2L	11529892	11529893	CG31706	0.2	0.1	0.15
chr2L	1154788	1154789	capt	3.8	5.3	4.55
chr2L	1159450	1159451	Tango14	3.8	3.2	3.5
chr2L	1160052	1160053	Tango14	5.3	2.4	3.85
chr2L	1160083	1160084	Tango14	15.15	9.5	12.32
chr2L	1160098	1160099	Tango14	15.8	8.8	12.3
chr2L	1161492	1161493	CG5080	3.6	1.9	2.75
chr2L	1161497	1161498	CG5080	3.6	3.7	3.65
chr2L	1161676	1161677	CG5080	3.4	2.3	2.85
chr2L	11623286	11623287	kek2	2.9	25	13.95
chr2L	11626097	11626098	kek2	2.9	4.2	3.55
chr2L	11626391	11626392	kek2	1.9	4.2	3.05
chr2L	1166912	1166913	CG14341	4.2	2.3	3.25
chr2L	1176958	1176959	CG4887	1.3	1.6	1.45
chr2L	1177074	1177075	CG4887	1.1	1.25	1.18
chr2L	1177189	1177190	CG4887	1.6	2.6	2.1
chr2L	1178010	1178011	CG4896	4	20	12
chr2L	11794497	11794498	crol	4.9	1.7	3.3
chr2L	11794830	11794831	crol	0.8	1	0.9
chr2L	11794836	11794837	crol	0.7	3.4	2.05
chr2L	11794846	11794847	crol	0.95	2	1.48
chr2L	11794847	11794848	crol	1	2.4	1.7
chr2L	11794875	11794876	crol	1	1.1	1.05
chr2L	11794889	11794890	crol	1	2.3	1.65
chr2L	11795274	11795275	crol	11.8	6.2	9
chr2L	11795766	11795767	crol	1.3	4	2.65
chr2L	11795814	11795815	crol	0.9	0.9	0.9
chr2L	11795987	11795988	crol	2.2	1.7	1.95
chr2L	11796266	11796267	crol	1.7	1.9	1.8
chr2L	11796618	11796619	crol	2.4	3.7	3.05
chr2L	11796982	11796983	crol	6.7	13	9.85
chr2L	11798930	11798931	crol	1.4	5.9	3.65
chr2L	11799321	11799322	crol	1.1	10	5.55
chr2L	11800267	11800268	crol	1.1	5.6	3.35
chr2L	11810323	11810324	CycY	9.5	14.7	12.1
chr2L	11811046	11811047	CycY	10	2.8	6.4
chr2L	1181334	1181335	CG4896	1.8	2.9	2.35
chr2L	11814198	11814199	Pde1c	1.6	1	1.3
chr2L	11814205	11814206	Pde1c	1.6	2	1.8
chr2L	11814234	11814235	Pde1c	2.6	2.9	2.75
chr2L	11814381	11814382	Pde1c	1.27	0.5	0.88
chr2L	11814434	11814435	Pde1c	0.7	0.9	0.8
chr2L	11814549	11814550	Pde1c	1	2.4	1.7
chr2L	11814811	11814812	Pde1c	2.3	6.1	4.2
chr2L	11815007	11815008	Pde1c	1.3	1.6	1.45
chr2L	11815059	11815060	Pde1c	1	1.1	1.05
chr2L	11815061	11815062	Pde1c	2	6.5	4.25
chr2L	11815224	11815225	Pde1c	2.98	4.88	3.93
chr2L	11815425	11815426	Pde1c	1.2	1.5	1.35
chr2L	11815556	11815557	Pde1c	1.8	1.1	1.45
chr2L	11815584	11815585	Pde1c	1	1.4	1.2
chr2L	11815663	11815664	Pde1c	1.3	1.3	1.3
chr2L	1182350	1182351	CG4896	3.1	4.5	3.8
chr2L	1182381	1182382	CG5126	5.1	1.3	3.2
chr2L	11828243	11828244	esc	14.3	20	17.15
chr2L	11828243	11828244	Pde1c	14.3	20	17.15
chr2L	11842839	11842840	CG14933	1.9	0.9	1.4
chr2L	11842911	11842912	CG14933	2.1	0.4	1.25
chr2L	11843006	11843007	Pde1c	1.1	0.5	0.8
chr2L	11843139	11843140	Pde1c	0.9	0.4	0.65
chr2L	118704	118705	CG11455	20	6.7	13.35
chr2L	11987321	11987322	CG6686	3.3	9.1	6.2
chr2L	12001760	12001761	CG6746	3.7	2	2.85
chr2L	12014601	12014602	CG6734	10	11.1	10.55
chr2L	12015144	12015145	CG6734	5	7.7	6.35
chr2L	12017071	12017072	CG6734	8.3	25	16.65
chr2L	12036730	12036731	Tom70	3.1	2.3	2.7
chr2L	12038762	12038763	CG6766	9.1	7.7	8.4
chr2L	12039028	12039029	CG6766	1.4	0.9	1.15
chr2L	12039446	12039447	CG6766	1.6	1.3	1.45
chr2L	12045348	12045349	CG6770	4.95	9.25	7.1
chr2L	12045485	12045486	CG6770	0.1	0	0.05
chr2L	12045490	12045491	CG6770	0.1	0	0.05
chr2L	12045496	12045497	CG6770	0.3	0	0.15
chr2L	12045505	12045506	CG6770	0.4	0.1	0.25
chr2L	12045527	12045528	CG6770	3	3.6	3.3
chr2L	12045684	12045685	CG6770	0.15	0.02	0.08
chr2L	12050359	12050360	CG14945	1.1	2.8	1.95
chr2L	12050419	12050420	CG14945	0.8	1	0.9
chr2L	12051813	12051814	CG14945	1.4	0.8	1.1
chr2L	12051826	12051827	JhI-21	1.2	0.7	0.95
chr2L	12051926	12051927	JhI-21	2.6	1.9	2.25
chr2L	12056681	12056682	CG34164	4.5	4.1	4.3
chr2L	12056681	12056682	RpL7-like	4.5	4.1	4.3
chr2L	12056806	12056807	CG34164	2.3	1.4	1.85
chr2L	12056806	12056807	RpL7-like	2.3	1.4	1.85
chr2L	12065530	12065531	CG14946	14.3	16.7	15.5
chr2L	12094333	12094334	Pex19	0.9	1.5	1.2
chr2L	12094416	12094417	Pex19	1	1.6	1.3
chr2L	12094599	12094600	Pex19	5.7	2.5	4.1
chr2L	12094698	12094699	Pex19	1	0.9	0.95
chr2L	12094704	12094705	Pex19	1	0.7	0.85
chr2L	12094824	12094825	Pex19	0.9	0.5	0.7
chr2L	12094857	12094858	Pex19	0.95	1.55	1.25
chr2L	12094899	12094900	Pex19	11.5	8.2	9.85
chr2L	12106060	12106061	Aats-thr	3.8	2.1	2.95
chr2L	12106705	12106706	Aats-thr	3.5	3.8	3.65
chr2L	12106708	12106709	Aats-thr	4.8	10.3	7.55
chr2L	12106710	12106711	Aats-thr	4.8	2.6	3.7
chr2L	12106734	12106735	Aats-thr	4.35	5.42	4.88
chr2L	12107823	12107824	Rab6	4.3	4.2	4.25
chr2L	12107962	12107963	Rab6	3.8	11.8	7.8
chr2L	12108941	12108942	Rab6	2.6	2.8	2.7
chr2L	12155626	12155627	CG31760	9.32	9.8	9.56
chr2L	12161375	12161376	CG31760	1.53	6.7	4.12
chr2L	12161593	12161594	CG31760	3.1	4.5	3.8
chr2L	12162929	12162930	CG31760	1.2	9.1	5.15
chr2L	12168467	12168468	CG31760	1.7	6.4	4.05
chr2L	12168759	12168760	CG31760	2	7.8	4.9
chr2L	12168854	12168855	CG31760	1.7	2	1.85
chr2L	12169631	12169632	CG31760	4.8	2.2	3.5
chr2L	12169965	12169966	CG31760	1.2	1.5	1.35
chr2L	12170315	12170316	CG31760	1.5	1.4	1.45
chr2L	12170446	12170447	CG31760	6.3	1.7	4
chr2L	123045	123046	CG11455	4	2.9	3.45
chr2L	123045	123046	CR44969	4	2.9	3.45
chr2L	12312633	12312634	aret	3.8	7.7	5.75
chr2L	123606	123607	CG11455	1.1	1.4	1.25
chr2L	123606	123607	CR44969	1.1	1.4	1.25
chr2L	12395948	12395949	bru-2	16.7	50	33.35
chr2L	12396319	12396320	bru-2	28.6	50	39.3
chr2L	12403510	12403511	vir-1	2.2	0.9	1.55
chr2L	12403680	12403681	vir-1	0.9	0.4	0.65
chr2L	12403968	12403969	vir-1	1.6	0.8	1.2
chr2L	12421744	12421745	vir-1	0.6	0.5	0.55
chr2L	124259	124260	CG11455	1	1	1
chr2L	12426956	12426957	CG5446	7.1	2.6	4.85
chr2L	12427278	12427279	CG5446	1.6	2.4	2
chr2L	12432180	12432181	SC35	3.4	1.3	2.35
chr2L	12432345	12432346	SC35	5.2	1.2	3.2
chr2L	124346	124347	CG3164	1	0.9	0.95
chr2L	12440436	12440437	Elf	3.7	2.9	3.3
chr2L	12455679	12455680	bun	0.2	0.2	0.2
chr2L	12456205	12456206	bun	0.3	0.2	0.25
chr2L	12456225	12456226	bun	0.3	0.2	0.25
chr2L	12456533	12456534	bun	2.1	1	1.55
chr2L	12456678	12456679	bun	0.9	1.2	1.05
chr2L	12456791	12456792	bun	0.3	0.4	0.35
chr2L	12456856	12456857	bun	0.6	1.7	1.15
chr2L	12456866	12456867	bun	0.9	0.4	0.65
chr2L	12456994	12456995	bun	0.4	0.3	0.35
chr2L	12456997	12456998	bun	0.45	0.3	0.38
chr2L	12457014	12457015	bun	0.8	0.3	0.55
chr2L	12457080	12457081	bun	2.12	0.82	1.47
chr2L	12457284	12457285	bun	1.98	2.02	2
chr2L	12460660	12460661	bun	1.1	1.3	1.2
chr2L	12460784	12460785	bun	2.4	2.2	2.3
chr2L	124818	124819	CG3164	1.8	2	1.9
chr2L	12536477	12536478	bun	2.2	2.2	2.2
chr2L	12691596	12691597	CG5525	2.9	1.6	2.25
chr2L	12697610	12697611	PICK1	1.5	1.7	1.6
chr2L	12697889	12697890	PICK1	1.5	1.6	1.55
chr2L	12698231	12698232	PICK1	2	2	2
chr2L	12698408	12698409	PICK1	4.8	1.8	3.3
chr2L	12698811	12698812	PICK1	5.22	5.38	5.3
chr2L	12707993	12707994	CG6180	0.6	0.43	0.52
chr2L	12708417	12708418	CG6180	1.1	0.4	0.75
chr2L	12708509	12708510	CG6180	1.55	1.9	1.73
chr2L	12708542	12708543	CG6180	1.1	0.4	0.75
chr2L	12709086	12709087	CG5787	3.7	8	5.85
chr2L	12713788	12713789	Pih1D1	1.5	1.3	1.4
chr2L	12744343	12744344	MRP	2.5	1.9	2.2
chr2L	12744355	12744356	MRP	1.7	1.6	1.65
chr2L	12744405	12744406	MRP	2.2	2.3	2.25
chr2L	12744589	12744590	MRP	2.2	2.3	2.25
chr2L	12817589	12817590	kek1	4.3	5.65	4.97
chr2L	12817612	12817613	kek1	2.3	3	2.65
chr2L	12817620	12817621	kek1	8.9	2.5	5.7
chr2L	12817715	12817716	kek1	1.9	2.3	2.1
chr2L	12818817	12818818	kek1	1	1.1	1.05
chr2L	12818825	12818826	kek1	1	1.8	1.4
chr2L	12820034	12820035	kek1	1.1	2.4	1.75
chr2L	12820798	12820799	kek1	1.8	2.8	2.3
chr2L	12820950	12820951	kek1	2.6	2.8	2.7
chr2L	12821586	12821587	kek1	2.48	10.22	6.35
chr2L	12821986	12821987	kek1	1.4	2.1	1.75
chr2L	12822110	12822111	kek1	1.4	1	1.2
chr2L	12822296	12822297	kek1	2.6	4.7	3.65
chr2L	128965	128966	CG11455	2.1	2.4	2.25
chr2L	1293671	1293672	robo3	2.2	2.6	2.4
chr2L	1294227	1294228	robo3	3.92	6.67	5.29
chr2L	12978170	12978171	Vha68-2	1.9	1.8	1.85
chr2L	12993988	12993989	CG12404	1.8	1.7	1.75
chr2L	13000254	13000255	CG12404	3	3.6	3.3
chr2L	13000364	13000365	CG12404	3.1	3.8	3.45
chr2L	13001020	13001021	Vha68-1	0.4	0.3	0.35
chr2L	13001031	13001032	Vha68-1	0.35	0.3	0.32
chr2L	13001054	13001055	Vha68-1	0.3	0.3	0.3
chr2L	13001101	13001102	Vha68-1	0.65	0.2	0.43
chr2L	13001104	13001105	Vha68-1	0.2	0.3	0.25
chr2L	13001119	13001120	Vha68-1	0.3	0.6	0.45
chr2L	13001244	13001245	Vha68-1	0.3	0.3	0.3
chr2L	13001259	13001260	Vha68-1	0.3	0.2	0.25
chr2L	13001315	13001316	Vha68-1	0.72	0.4	0.56
chr2L	13001355	13001356	Vha68-1	0.2	0.2	0.2
chr2L	13002426	13002427	Vha68-1	1.25	2.4	1.82
chr2L	13004058	13004059	Vha68-1	0.2	0.5	0.35
chr2L	13011005	13011006	Tor	4.8	33.3	19.05
chr2L	13012380	13012381	Tor	4.3	11.1	7.7
chr2L	13014498	13014499	CG9934	2.15	3.8	2.97
chr2L	13017173	13017174	CG9934	5	25	15
chr2L	13017913	13017914	CG9934	3.6	25	14.3
chr2L	13022188	13022189	CG9932	2.2	1.5	1.85
chr2L	13023179	13023180	CG9932	2.3	4.3	3.3
chr2L	13023330	13023331	CG9932	2.8	4.3	3.55
chr2L	13142872	13142873	CG9928	1.3	0.4	0.85
chr2L	13163324	13163325	DnaJ-H	7.7	8	7.85
chr2L	13163619	13163620	DnaJ-H	0.8	0.6	0.7
chr2L	13164133	13164134	DnaJ-H	1.6	0.6	1.1
chr2L	13165740	13165741	Sir2	6.25	10.62	8.43
chr2L	13165742	13165743	Sir2	2.9	12.5	7.7
chr2L	13167601	13167602	Sir2	2.2	5.9	4.05
chr2L	13168424	13168425	Sir2	1.8	8	4.9
chr2L	13169369	13169370	Sir2	3.1	2.3	2.7
chr2L	13178329	13178330	CG5439	7.1	13.3	10.2
chr2L	13178633	13178634	CG5439	6.3	3.7	5
chr2L	13183237	13183238	CG5287	15.4	4.2	9.8
chr2L	13185305	13185306	CG16974	1.02	0.68	0.85
chr2L	13185368	13185369	CG16974	0.9	0.8	0.85
chr2L	13185862	13185863	CG16974	0.75	0.92	0.84
chr2L	13195659	13195660	Edem2	2.6	2.9	2.75
chr2L	13210661	13210662	Pect	3.4	14	8.7
chr2L	13212712	13212713	kek4	7.7	1.9	4.8
chr2L	13213496	13213497	kek4	4.8	5.6	5.2
chr2L	132142	132143	CG11455	0.6	0.8	0.7
chr2L	132142	132143	Gs1	0.6	0.8	0.7
chr2L	13216551	13216552	CG9426	1.9	2.7	2.3
chr2L	13216551	13216552	snRNA:U2:34ABb	1.9	2.7	2.3
chr2L	13216551	13216552	snRNA:U2:34ABc	1.9	2.7	2.3
chr2L	13216625	13216626	CG9426	4.3	9	6.65
chr2L	13216625	13216626	snRNA:U2:34ABb	4.3	9	6.65
chr2L	13216625	13216626	snRNA:U2:34ABc	4.3	9	6.65
chr2L	13217159	13217160	CG9426	2.2	1.6	1.9
chr2L	13217159	13217160	snRNA:U2:34ABb	2.2	1.6	1.9
chr2L	13217159	13217160	snRNA:U2:34ABc	2.2	1.6	1.9
chr2L	13217264	13217265	CG9426	14.1	9.5	11.8
chr2L	13217264	13217265	snRNA:U2:34ABb	14.1	9.5	11.8
chr2L	13217264	13217265	snRNA:U2:34ABc	14.1	9.5	11.8
chr2L	13217928	13217929	CG9426	2.6	1.9	2.25
chr2L	13217928	13217929	snRNA:U2:34ABb	2.6	1.9	2.25
chr2L	13217928	13217929	snRNA:U2:34ABc	2.6	1.9	2.25
chr2L	13219301	13219302	CG9426	2.4	3.3	2.85
chr2L	13219301	13219302	snRNA:U2:34ABb	2.4	3.3	2.85
chr2L	13219301	13219302	snRNA:U2:34ABc	2.4	3.3	2.85
chr2L	132198	132199	CG11455	1.5	0.8	1.15
chr2L	132198	132199	Gs1	1.5	0.8	1.15
chr2L	13238929	13238930	snRNA:U2:34ABb	1.2	1.8	1.5
chr2L	13238929	13238930	snRNA:U2:34ABc	1.2	1.8	1.5
chr2L	13289340	13289341	Uvrag	6.3	5.4	5.85
chr2L	13289354	13289355	Uvrag	5.6	2.6	4.1
chr2L	13289383	13289384	Uvrag	8.7	3.6	6.15
chr2L	13296549	13296550	CG31729	2.1	8.3	5.2
chr2L	13299137	13299138	CG31729	1.1	4.2	2.65
chr2L	13299707	13299708	CG31729	1.2	2.5	1.85
chr2L	13301228	13301229	CG31729	1.2	1.4	1.3
chr2L	13301829	13301830	CG43778	3.5	3.6	3.55
chr2L	13301851	13301852	CG43778	3.8	3.8	3.8
chr2L	13301853	13301854	CG43778	13.5	21.5	17.5
chr2L	13301854	13301855	CG43778	5.8	21.8	13.8
chr2L	13301860	13301861	CG43778	4.2	2.7	3.45
chr2L	13301878	13301879	CG43778	1.9	1.4	1.65
chr2L	13301959	13301960	CG43778	0.6	1.8	1.2
chr2L	13302072	13302073	CG43778	8.7	13.1	10.9
chr2L	13302101	13302102	CG43778	0.9	0.8	0.85
chr2L	13302213	13302214	CG43778	1.4	1.1	1.25
chr2L	13302417	13302418	CG43778	0.9	1.4	1.15
chr2L	13302582	13302583	CG43778	1.1	1.3	1.2
chr2L	13302688	13302689	CG43778	0.9	1	0.95
chr2L	13302689	13302690	CG43778	0.9	1.8	1.35
chr2L	13302746	13302747	CG43778	1.1	1.8	1.45
chr2L	13302926	13302927	CG43778	4.2	1.8	3
chr2L	13303053	13303054	CG43778	2	5	3.5
chr2L	13303406	13303407	CG43778	1.2	2.3	1.75
chr2L	13303718	13303719	CG43778	6.5	11.1	8.8
chr2L	13303777	13303778	CG43778	1.5	3.7	2.6
chr2L	13350057	13350058	CG9395	1.1	1.4	1.25
chr2L	13350277	13350278	CG9395	1.1	1.5	1.3
chr2L	13350745	13350746	CG9395	11.3	15.9	13.6
chr2L	13350883	13350884	CG9395	2.6	7.5	5.05
chr2L	13351106	13351107	CG9395	2.1	3.2	2.65
chr2L	13351773	13351774	CG9395	1.3	4.7	3
chr2L	13352443	13352444	CG9395	2.8	3	2.9
chr2L	13353371	13353372	CG9395	2	7.7	4.85
chr2L	13353384	13353385	CG9395	1.6	5	3.3
chr2L	13360132	13360133	CG9377	1.1	0.5	0.8
chr2L	13363843	13363844	Nnp-1	9.1	3.8	6.45
chr2L	13363854	13363855	Nnp-1	3.6	2.5	3.05
chr2L	13363883	13363884	Nnp-1	5.9	13.8	9.85
chr2L	13363884	13363885	Nnp-1	5.9	7.1	6.5
chr2L	13368832	13368833	Tap42	8.7	3.1	5.9
chr2L	13369642	13369643	CG31855	2.8	3.1	2.95
chr2L	13370259	13370260	CG9306	3	3	3
chr2L	13370443	13370444	CG9306	0.5	0.9	0.7
chr2L	13370557	13370558	CG9306	0.48	0.52	0.5
chr2L	13370754	13370755	CG9306	0.5	0.5	0.5
chr2L	13370850	13370851	CG9306	1.1	0.3	0.7
chr2L	13370861	13370862	CG9306	0.4	0.7	0.55
chr2L	13370904	13370905	CG9306	4.95	3.93	4.44
chr2L	13370954	13370955	CG9306	0.3	0.2	0.25
chr2L	13370976	13370977	CG9306	5.6	0.4	3
chr2L	13372006	13372007	CG9305	11.1	13.3	12.2
chr2L	13376695	13376696	CG9302	10	4	7
chr2L	13377389	13377390	CG9302	4.8	4.3	4.55
chr2L	13382764	13382765	loqs	2.3	2	2.15
chr2L	13382895	13382896	loqs	1.6	2.4	2
chr2L	13382897	13382898	loqs	0.8	2.6	1.7
chr2L	13382946	13382947	loqs	4.73	3.05	3.89
chr2L	13382976	13382977	loqs	0.7	1.2	0.95
chr2L	13383009	13383010	loqs	1.5	3.5	2.5
chr2L	13383323	13383324	loqs	0.7	0.7	0.7
chr2L	13383458	13383459	loqs	0.5	0.5	0.5
chr2L	13383460	13383461	loqs	1.7	0.92	1.31
chr2L	13383493	13383494	loqs	1.1	0.6	0.85
chr2L	13384678	13384679	loqs	0.8	0.8	0.8
chr2L	13384732	13384733	loqs	1.9	1.7	1.8
chr2L	13384996	13384997	loqs	0.6	0.6	0.6
chr2L	13385013	13385014	CR44599	1.15	0.5	0.82
chr2L	13385211	13385212	loqs	0.7	1	0.85
chr2L	13385230	13385231	loqs	6.8	8	7.4
chr2L	13385342	13385343	loqs	0.6	1.4	1
chr2L	13385391	13385392	loqs	0.8	0.8	0.8
chr2L	13385393	13385394	loqs	0.7	0.4	0.55
chr2L	13385395	13385396	loqs	0.7	0.6	0.65
chr2L	13385397	13385398	loqs	0.7	0.4	0.55
chr2L	13385399	13385400	loqs	1.55	1.3	1.43
chr2L	13385403	13385404	loqs	0.7	1.1	0.9
chr2L	13385454	13385455	loqs	1.8	1.2	1.5
chr2L	13385482	13385483	loqs	1.4	1.7	1.55
chr2L	13385519	13385520	loqs	4.1	1.1	2.6
chr2L	13385526	13385527	loqs	0.8	0.5	0.65
chr2L	13385533	13385534	loqs	0.8	0.5	0.65
chr2L	13385608	13385609	loqs	0.9	1.3	1.1
chr2L	13385620	13385621	loqs	9	8	8.5
chr2L	13385664	13385665	loqs	0.9	4.1	2.5
chr2L	13386812	13386813	CG9293	2.8	2.3	2.55
chr2L	13386829	13386830	CG9293	3.2	2.3	2.75
chr2L	133869	133870	CG11455	2	3.85	2.92
chr2L	133869	133870	Gs1	2	3.85	2.92
chr2L	13393749	13393750	CG7099	11.1	3.7	7.4
chr2L	13394146	13394147	RpL24	1.2	0.6	0.9
chr2L	13394197	13394198	RpL24	1	0.4	0.7
chr2L	13394198	13394199	RpL24	4.4	2.1	3.25
chr2L	13394243	13394244	RpL24	0.5	0.2	0.35
chr2L	133945	133946	CG11455	0.5	0.4	0.45
chr2L	133945	133946	Gs1	0.5	0.4	0.45
chr2L	13395070	13395071	RpL24	0.4	0.5	0.45
chr2L	13405613	13405614	CG7110	14.3	14.3	14.3
chr2L	134326	134327	CG11455	1.2	1.4	1.3
chr2L	134326	134327	Gs1	1.2	1.4	1.3
chr2L	13444229	13444230	CG42784	3.6	2.3	2.95
chr2L	13444924	13444925	CG9267	4	3.1	3.55
chr2L	13445582	13445583	CG42784	2	1.8	1.9
chr2L	13446667	13446668	CG42784	5	14.3	9.65
chr2L	13473808	13473809	CG42784	4.8	33.3	19.05
chr2L	13474077	13474078	CG42784	3	50	26.5
chr2L	13474120	13474121	CG42784	2.9	50	26.45
chr2L	13484252	13484253	CG42784	3.7	25	14.35
chr2L	13486991	13486992	CG42784	4.5	20	12.25
chr2L	13488160	13488161	CG42784	5	4.3	4.65
chr2L	13488543	13488544	CG42784	2	1.9	1.95
chr2L	13489564	13489565	CG42784	1.1	4.8	2.95
chr2L	13490139	13490140	CG42784	5.3	20	12.65
chr2L	13491188	13491189	CG42784	2.9	11.1	7
chr2L	13491383	13491384	CG42784	1.6	3	2.3
chr2L	13492690	13492691	CG42784	1.8	10	5.9
chr2L	13496654	13496655	CG42784	1.3	1.4	1.35
chr2L	13497814	13497815	CG42784	0.9	2.1	1.5
chr2L	13498048	13498049	CG42784	0.4	1.8	1.1
chr2L	13499575	13499576	CG42784	0.4	1.2	0.8
chr2L	13499780	13499781	CG42784	0.4	0.5	0.45
chr2L	13499870	13499871	CG42784	0.4	0.5	0.45
chr2L	13499935	13499936	CG42784	1.5	1.4	1.45
chr2L	13500231	13500232	CG42784	0.5	0.7	0.6
chr2L	13500992	13500993	B4	1.2	2.6	1.9
chr2L	13501113	13501114	B4	4.3	0.9	2.6
chr2L	13501127	13501128	B4	1.2	1.1	1.15
chr2L	13501162	13501163	B4	1.5	1.4	1.45
chr2L	13501272	13501273	B4	1.6	2.5	2.05
chr2L	13501491	13501492	B4	1	3	2
chr2L	13502077	13502078	B4	1.9	3.4	2.65
chr2L	13502187	13502188	B4	3.6	7.5	5.55
chr2L	13502547	13502548	B4	2.83	3.4	3.12
chr2L	13502549	13502550	B4	8.4	4.2	6.3
chr2L	13502550	13502551	B4	2.1	8.3	5.2
chr2L	13502551	13502552	B4	4	4.2	4.1
chr2L	13503281	13503282	B4	1.6	4.5	3.05
chr2L	13503287	13503288	B4	20.9	4.2	12.55
chr2L	13503306	13503307	B4	20	17.4	18.7
chr2L	13504001	13504002	B4	2.2	4.5	3.35
chr2L	13504049	13504050	B4	1.4	5	3.2
chr2L	13504906	13504907	B4	1.1	5	3.05
chr2L	13506083	13506084	B4	4.1	20	12.05
chr2L	13508929	13508930	B4	1.8	25	13.4
chr2L	13513465	13513466	B4	10.7	100	55.35
chr2L	1360894	1360895	NLaz	1.1	2.6	1.85
chr2L	13637765	13637766	kuz	3.8	2.5	3.15
chr2L	13771351	13771352	TM9SF4	4	15.8	9.9
chr2L	13771519	13771520	TM9SF4	2.3	4.2	3.25
chr2L	13772335	13772336	TM9SF4	1.4	2.2	1.8
chr2L	13772777	13772778	TM9SF4	6.7	2	4.35
chr2L	13773058	13773059	TM9SF4	2.7	4.3	3.5
chr2L	13773472	13773473	TM9SF4	3.2	4.2	3.7
chr2L	13773784	13773785	TM9SF4	4.3	3.2	3.75
chr2L	13773840	13773841	TM9SF4	20	7.7	13.85
chr2L	13774707	13774708	CG9008	10	20.8	15.4
chr2L	13781350	13781351	p38b	5.3	5.6	5.45
chr2L	13782248	13782249	p38b	3.1	6.8	4.95
chr2L	13782327	13782328	CG16890	7.7	6.7	7.2
chr2L	13782386	13782387	CG16890	3.1	1.3	2.2
chr2L	13782485	13782486	p38b	2.4	1.2	1.8
chr2L	13782627	13782628	CG16890	4.8	16.7	10.75
chr2L	13782803	13782804	CG16890	6.3	4.8	5.55
chr2L	13783123	13783124	CG16890	4.3	3.7	4
chr2L	13786648	13786649	CG31731	9.1	11.1	10.1
chr2L	13789101	13789102	CG31731	2.5	4.8	3.65
chr2L	13790083	13790084	CG31731	3.3	2.9	3.1
chr2L	13790143	13790144	CG31731	2.5	3.2	2.85
chr2L	13808873	13808874	CAH1	0.7	0.5	0.6
chr2L	13809665	13809666	adat	0.5	1.8	1.15
chr2L	13809689	13809690	adat	1.6	0.8	1.2
chr2L	13811972	13811973	CG16865	18.5	9.1	13.8
chr2L	13811981	13811982	CG16865	14.8	23.5	19.15
chr2L	13812158	13812159	CG16865	4.2	5.9	5.05
chr2L	13815674	13815675	Sos	2.6	20	11.3
chr2L	13817189	13817190	Sos	3	13.6	8.3
chr2L	13817823	13817824	Sos	8	6.7	7.35
chr2L	13818385	13818386	Sos	8.7	6.9	7.8
chr2L	13818806	13818807	Sos	2.5	2.9	2.7
chr2L	13819570	13819571	Sos	4.5	2	3.25
chr2L	1382078	1382079	lea	16.7	100	58.35
chr2L	13828122	13828123	Arpc1	1.8	0.7	1.25
chr2L	13828141	13828142	Arpc1	3.8	0.7	2.25
chr2L	13828535	13828536	Arpc1	1.2	0.9	1.05
chr2L	13828537	13828538	Arpc1	1.2	1	1.1
chr2L	13828966	13828967	Arpc1	1.2	1.1	1.15
chr2L	13829578	13829579	Arpc1	2.8	4.5	3.65
chr2L	13831676	13831677	CG33649	2.3	2.9	2.6
chr2L	13831676	13831677	DNApol-gamma35	2.3	2.9	2.6
chr2L	13831970	13831971	CG33649	1.8	3.3	2.55
chr2L	13831970	13831971	DNApol-gamma35	1.8	3.3	2.55
chr2L	13832453	13832454	CG33649	5.4	3.4	4.4
chr2L	13832453	13832454	DNApol-gamma35	5.4	3.4	4.4
chr2L	13832547	13832548	CG33649	7	3.2	5.1
chr2L	13832547	13832548	DNApol-gamma35	7	3.2	5.1
chr2L	13832565	13832566	CG33649	2.8	4.8	3.8
chr2L	13832565	13832566	DNApol-gamma35	2.8	4.8	3.8
chr2L	13832899	13832900	CG33649	4.2	3.6	3.9
chr2L	13832899	13832900	DNApol-gamma35	4.2	3.6	3.9
chr2L	13833916	13833917	RpII33	10	3.8	6.9
chr2L	13833948	13833949	RpII33	3.8	1.7	2.75
chr2L	13834959	13834960	mRpS23	2.7	7.4	5.05
chr2L	13895872	13895873	CenG1A	1.9	10	5.95
chr2L	13896191	13896192	CenG1A	2.7	10	6.35
chr2L	13897477	13897478	CenG1A	16.12	20.05	18.09
chr2L	13898200	13898201	CenG1A	2.2	2.1	2.15
chr2L	13898256	13898257	CenG1A	2.9	2.4	2.65
chr2L	13899293	13899294	Smg5	1.3	0.9	1.1
chr2L	13899382	13899383	Smg5	1.2	1.9	1.55
chr2L	13899683	13899684	Smg5	0.9	1	0.95
chr2L	13900177	13900178	Smg5	1.1	2.7	1.9
chr2L	13902290	13902291	Smg5	1.2	5.9	3.55
chr2L	13903066	13903067	Smg5	1.6	5.9	3.75
chr2L	13965798	13965799	NimB2	4.2	1	2.6
chr2L	13977543	13977544	Cyp28a5	1	0.9	0.95
chr2L	13978224	13978225	Cyp28a5	0.8	0.8	0.8
chr2L	14015903	14015904	bgm	14.3	10	12.15
chr2L	14042193	14042194	nAChRalpha5	1.4	5.9	3.65
chr2L	14061056	14061057	nAChRalpha5	1.1	7.1	4.1
chr2L	14061113	14061114	nAChRalpha5	1.4	7.1	4.25
chr2L	14062580	14062581	nAChRalpha5	3.7	6.7	5.2
chr2L	14068900	14068901	nAChRalpha5	3.9	4.8	4.35
chr2L	14076599	14076600	nAChRalpha5	5.2	4.8	5
chr2L	14086341	14086342	nAChRalpha5	3.2	11.1	7.15
chr2L	14086705	14086706	nAChRalpha5	2.3	4.5	3.4
chr2L	14089285	14089286	nAChRalpha5	3.35	1.2	2.27
chr2L	14089378	14089379	nAChRalpha5	2.2	3.25	2.73
chr2L	14089616	14089617	nAChRalpha5	0.9	1.1	1
chr2L	14089634	14089635	nAChRalpha5	0.9	1.3	1.1
chr2L	14090527	14090528	nAChRalpha5	0.9	1.6	1.25
chr2L	14091374	14091375	nAChRalpha5	0.7	2.4	1.55
chr2L	14091733	14091734	nAChRalpha5	0.9	1.2	1.05
chr2L	14091899	14091900	nAChRalpha5	2.4	1.8	2.1
chr2L	14092202	14092203	nAChRalpha5	0.4	1.5	0.95
chr2L	14092284	14092285	nAChRalpha5	0.6	0.9	0.75
chr2L	14092345	14092346	nAChRalpha5	0.6	0.8	0.7
chr2L	14092871	14092872	nAChRalpha5	6.7	2.9	4.8
chr2L	14092988	14092989	nAChRalpha5	1.4	0.9	1.15
chr2L	14092993	14092994	nAChRalpha5	1.3	1	1.15
chr2L	14093096	14093097	nAChRalpha5	2.9	2.7	2.8
chr2L	14093104	14093105	nAChRalpha5	1.6	1.1	1.35
chr2L	14093180	14093181	nAChRalpha5	1.5	1.1	1.3
chr2L	14093183	14093184	nAChRalpha5	1.3	2.2	1.75
chr2L	14093257	14093258	nAChRalpha5	3.3	0.7	2
chr2L	14093392	14093393	nAChRalpha5	1.1	1.1	1.1
chr2L	14093431	14093432	nAChRalpha5	0.9	1.5	1.2
chr2L	14093507	14093508	nAChRalpha5	1.3	2.1	1.7
chr2L	14093750	14093751	nAChRalpha5	1.4	1	1.2
chr2L	14108626	14108627	CG15293	1.5	0.4	0.95
chr2L	14108680	14108681	CG15293	2.7	0.4	1.55
chr2L	14108930	14108931	CG15293	1.75	1	1.38
chr2L	14159401	14159402	CG17341	2.2	3.3	2.75
chr2L	14159510	14159511	CG17341	2.9	2.9	2.9
chr2L	141711	141712	CG11455	1.5	0.8	1.15
chr2L	14184676	14184677	Dyrk2	3.6	2.5	3.05
chr2L	14184813	14184814	Dyrk2	1	0.8	0.9
chr2L	14184817	14184818	Dyrk2	1.9	0.8	1.35
chr2L	14184840	14184841	Dyrk2	3.6	7.1	5.35
chr2L	14184849	14184850	Dyrk2	1.8	0.8	1.3
chr2L	14185081	14185082	Dyrk2	2.2	2.2	2.2
chr2L	14185226	14185227	Dyrk2	5.1	1.4	3.25
chr2L	14185287	14185288	Dyrk2	1.1	1.7	1.4
chr2L	14185331	14185332	Dyrk2	1.2	1.6	1.4
chr2L	14185417	14185418	Dyrk2	1	2.6	1.8
chr2L	14185590	14185591	Dyrk2	2.9	1.7	2.3
chr2L	14188892	14188893	Dyrk2	19.55	15.28	17.41
chr2L	14334475	14334476	CG33090	1.9	5.3	3.6
chr2L	14342863	14342864	CG33090	1.3	3.4	2.35
chr2L	14344621	14344622	CG33090	0.9	2.2	1.55
chr2L	14344912	14344913	CG33090	1.27	1.32	1.29
chr2L	14345224	14345225	CG33090	1	1.1	1.05
chr2L	14345471	14345472	CG33090	1.2	1.2	1.2
chr2L	14345560	14345561	CG33090	0.7	0.5	0.6
chr2L	14345571	14345572	CG33090	0.7	0.9	0.8
chr2L	14345579	14345580	CG33090	0.7	1.8	1.25
chr2L	14345614	14345615	CG33090	3.03	1.8	2.42
chr2L	14345659	14345660	CG33090	3.1	3.8	3.45
chr2L	14345666	14345667	CG33090	2.8	6.6	4.7
chr2L	14348109	14348110	mTTF	6.3	12.5	9.4
chr2L	14348219	14348220	mTTF	6.7	10	8.35
chr2L	14353982	14353983	l(2)34Fd	10	33.3	21.65
chr2L	14355190	14355191	Rab14	9.1	0.9	5
chr2L	14358010	14358011	Rab14	0.6	0.4	0.5
chr2L	14358052	14358053	Rab14	1	0.6	0.8
chr2L	14358153	14358154	Rab14	0.8	2.2	1.5
chr2L	14358181	14358182	Rab14	4.65	3.35	4
chr2L	14358401	14358402	Rab14	1.7	3.6	2.65
chr2L	14358663	14358664	Rab14	0.9	0.4	0.65
chr2L	14390801	14390802	elB	7.7	4.5	6.1
chr2L	14390866	14390867	elB	4	9.7	6.85
chr2L	14390989	14390990	elB	3.6	3	3.3
chr2L	14391455	14391456	elB	3.6	5.3	4.45
chr2L	14391488	14391489	elB	3.1	5.6	4.35
chr2L	14392746	14392747	elB	3.6	8.7	6.15
chr2L	144344	144345	CG42399	14.3	5.6	9.95
chr2L	144725	144726	CG11455	4.5	11.1	7.8
chr2L	14493311	14493312	noc	2.1	2.8	2.45
chr2L	14493387	14493388	noc	1.3	1	1.15
chr2L	14493423	14493424	noc	2.6	2.3	2.45
chr2L	14493695	14493696	noc	3.2	1.4	2.3
chr2L	14615878	14615879	osp	3	7.1	5.05
chr2L	14617301	14617302	Adh	0.1	0	0.05
chr2L	14617301	14617302	Adhr	0.1	0	0.05
chr2L	14617559	14617560	Adh	9.1	4.8	6.95
chr2L	14617559	14617560	Adhr	9.1	4.8	6.95
chr2L	14743672	14743673	CG34166	1.8	0.2	1
chr2L	147831	147832	CG42399	6.7	12.5	9.6
chr2L	148501	148502	CG11455	4.2	10	7.1
chr2L	14907791	14907792	CG42313	2	1.9	1.95
chr2L	14908065	14908066	CG42313	4.8	5.6	5.2
chr2L	14908873	14908874	CG42313	2	3.1	2.55
chr2L	14908931	14908932	CG42313	1.5	2.3	1.9
chr2L	14912106	14912107	CG42313	3.9	3.3	3.6
chr2L	14912128	14912129	CG42313	1.9	3	2.45
chr2L	14912140	14912141	CG42313	1.8	2.8	2.3
chr2L	15006131	15006132	dyn-p25	3.4	1.3	2.35
chr2L	15006350	15006351	dyn-p25	2.8	4.6	3.7
chr2L	15017335	15017336	GABA-B-R1	2.9	6.3	4.6
chr2L	15030483	15030484	GABA-B-R1	1.8	8.7	5.25
chr2L	15030606	15030607	GABA-B-R1	3.9	5.6	4.75
chr2L	15030777	15030778	GABA-B-R1	1.5	4.5	3
chr2L	15030805	15030806	GABA-B-R1	7.8	4.2	6
chr2L	15030811	15030812	GABA-B-R1	1.4	3.8	2.6
chr2L	15033618	15033619	GABA-B-R1	2.4	6.5	4.45
chr2L	15033710	15033711	GABA-B-R1	1.8	7.7	4.75
chr2L	15033735	15033736	GABA-B-R1	5.7	6.1	5.9
chr2L	15034404	15034405	GABA-B-R1	1.5	1	1.25
chr2L	15034409	15034410	GABA-B-R1	1.7	1.1	1.4
chr2L	15063018	15063019	vas	0.7	0.3	0.5
chr2L	15063094	15063095	vig	0.7	0.4	0.55
chr2L	15063109	15063110	vig	0.6	1.8	1.2
chr2L	15063205	15063206	vas	0.7	0.4	0.55
chr2L	15063211	15063212	vas	0.7	0.5	0.6
chr2L	15063214	15063215	vig	0.6	1.3	0.95
chr2L	15063302	15063303	vas	0.6	0.4	0.5
chr2L	15063410	15063411	vas	0.6	0.5	0.55
chr2L	15063445	15063446	vig	1.2	0.5	0.85
chr2L	15063449	15063450	vas	0.6	0.9	0.75
chr2L	15063471	15063472	vas	0.5	0.4	0.45
chr2L	15063487	15063488	vig	1.1	0.7	0.9
chr2L	15063498	15063499	vig	0.6	0.5	0.55
chr2L	15063504	15063505	vig	0.6	0.5	0.55
chr2L	15063693	15063694	vas	2.4	1	1.7
chr2L	15064051	15064052	vig	0.8	0.8	0.8
chr2L	15064067	15064068	vig	1.8	3.2	2.5
chr2L	15064070	15064071	vig	11.6	8.12	9.86
chr2L	15064071	15064072	vig	19.6	18.3	18.95
chr2L	15064072	15064073	vig	0.6	0.7	0.65
chr2L	15064102	15064103	vig	0.5	0.5	0.5
chr2L	15064121	15064122	vig	4.4	6.6	5.5
chr2L	15064130	15064131	vas	1.1	0.7	0.9
chr2L	15064140	15064141	vig	2.2	0.7	1.45
chr2L	15064280	15064281	vig	1.7	1.5	1.6
chr2L	15064349	15064350	vig	1.1	1.55	1.33
chr2L	15064369	15064370	vas	0.5	0.6	0.55
chr2L	15064410	15064411	vig	32.9	29.35	31.12
chr2L	15064524	15064525	vig	0.4	1.2	0.8
chr2L	15064571	15064572	vig	0.8	0.78	0.79
chr2L	15064856	15064857	vas	0.6	2.7	1.65
chr2L	15067006	15067007	vas	0.6	1.2	0.9
chr2L	15067572	15067573	vig	2.3	7.9	5.1
chr2L	15095688	15095689	CG15270	1	3.3	2.15
chr2L	15096467	15096468	CG15270	1.1	1	1.05
chr2L	15096572	15096573	CG15270	1.1	1.1	1.1
chr2L	15096701	15096702	CG15270	8.6	9.1	8.85
chr2L	15096702	15096703	CG15270	6.9	1.5	4.2
chr2L	15252742	15252743	dao	5.6	15.8	10.7
chr2L	15265848	15265849	Cul3	2.7	2	2.35
chr2L	15266416	15266417	Cul3	1.9	7.4	4.65
chr2L	15266878	15266879	Cul3	7.1	11.1	9.1
chr2L	155725	155726	CG11455	0.4	0.15	0.28
chr2L	15580657	15580658	kek3	2.8	11.1	6.95
chr2L	15583593	15583594	kek3	1.7	2	1.85
chr2L	15583754	15583755	kek3	18.8	23.7	21.25
chr2L	15583837	15583838	kek3	5	3.2	4.1
chr2L	15583870	15583871	kek3	2	1.6	1.8
chr2L	155902	155903	CG11455	6.2	7.2	6.7
chr2L	155973	155974	CG11455	2.7	1.4	2.05
chr2L	155989	155990	CG11455	1.5	1.2	1.35
chr2L	156004	156005	CG11455	2.1	0.8	1.45
chr2L	15644302	15644303	CG4587	0.9	0.8	0.85
chr2L	15644345	15644346	CG4587	2	1.7	1.85
chr2L	15644460	15644461	CG4587	1.2	0.5	0.85
chr2L	15644516	15644517	CG4587	1.9	2.9	2.4
chr2L	15644546	15644547	CG4587	12.1	4.7	8.4
chr2L	15644682	15644683	CG4587	1.1	0.8	0.95
chr2L	15644690	15644691	CG4587	1.6	2.1	1.85
chr2L	15645042	15645043	CG4587	1.2	1.1	1.15
chr2L	15645130	15645131	CG4587	0.9	1	0.95
chr2L	15645306	15645307	CG4587	1	0.7	0.85
chr2L	15645328	15645329	CG4587	1	0.9	0.95
chr2L	15645451	15645452	CG4587	1.4	1.2	1.3
chr2L	15645473	15645474	CG4587	1.4	1.4	1.4
chr2L	15645950	15645951	CG4587	1.4	2	1.7
chr2L	15646192	15646193	CG4587	0.4	1	0.7
chr2L	15646284	15646285	CG4587	1.6	2.8	2.2
chr2L	15646522	15646523	CG4587	1.8	3.7	2.75
chr2L	15646546	15646547	CG4587	1.1	1.9	1.5
chr2L	15647094	15647095	CG4587	0.9	2.6	1.75
chr2L	15647545	15647546	CG4587	3.3	3.2	3.25
chr2L	15647759	15647760	CG4587	0.7	2.2	1.45
chr2L	15647970	15647971	CG4587	0.9	5.6	3.25
chr2L	156520	156521	CG3436	3.2	2.6	2.9
chr2L	15682908	15682909	CG18477	1.6	4	2.8
chr2L	15682908	15682909	CG18478	1.6	4	2.8
chr2L	15682908	15682909	CG31780	1.6	4	2.8
chr2L	15682908	15682909	CG31827	1.6	4	2.8
chr2L	156833	156834	CG3436	1.8	3.2	2.5
chr2L	156906	156907	CG3436	2.4	2.3	2.35
chr2L	15750998	15750999	l(2)35Di	0.5	0.7	0.6
chr2L	15754867	15754868	l(2)35Df	5.3	11.1	8.2
chr2L	15905569	15905570	beat-Ib	1.3	1.4	1.35
chr2L	15905576	15905577	beat-Ib	1.35	2.58	1.97
chr2L	15905597	15905598	beat-Ib	1.1	1.2	1.15
chr2L	15908184	15908185	beat-Ib	1.6	3.6	2.6
chr2L	1595319	1595320	CG31935	5	4	4.5
chr2L	1595751	1595752	CG31935	9.7	6.38	8.04
chr2L	16039755	16039756	beat-Ic	3.3	12.5	7.9
chr2L	16040143	16040144	beat-Ic	8.3	6.7	7.5
chr2L	16040464	16040465	beat-Ic	11.4	6.5	8.95
chr2L	16076729	16076730	beat-Ia	2.4	5.3	3.85
chr2L	16081030	16081031	beat-Ia	1.5	4.4	2.95
chr2L	16081193	16081194	beat-Ia	2.9	1.9	2.4
chr2L	1610279	1610280	CG31935	10.5	41.7	26.1
chr2L	1612634	1612635	RFeSP	7.08	6.78	6.93
chr2L	1613248	1613249	RFeSP	0.3	0.4	0.35
chr2L	1614050	1614051	RFeSP	0.2	0.1	0.15
chr2L	16181864	16181865	Ca-alpha1D	1.5	7.7	4.6
chr2L	16184473	16184474	Ca-alpha1D	5.7	3.4	4.55
chr2L	16185422	16185423	Ca-alpha1D	0.6	4.1	2.35
chr2L	16185518	16185519	Ca-alpha1D	0.9	2.3	1.6
chr2L	16189328	16189329	Ca-alpha1D	0.6	0.7	0.65
chr2L	16189745	16189746	Ca-alpha1D	0.68	0.92	0.8
chr2L	16190190	16190191	Ca-alpha1D	1.3	0.8	1.05
chr2L	16190227	16190228	Ca-alpha1D	1.4	1.1	1.25
chr2L	16190237	16190238	Ca-alpha1D	0.7	0.7	0.7
chr2L	16190299	16190300	Ca-alpha1D	0.7	2.1	1.4
chr2L	16190303	16190304	Ca-alpha1D	0.8	2.8	1.8
chr2L	16190355	16190356	Ca-alpha1D	1.6	3.1	2.35
chr2L	16190383	16190384	Ca-alpha1D	4	5	4.5
chr2L	16190385	16190386	Ca-alpha1D	2	0.7	1.35
chr2L	16238574	16238575	CG42817	8.7	22.2	15.45
chr2L	16239443	16239444	CG42817	1.6	5.3	3.45
chr2L	16240167	16240168	CG42817	4.5	14.3	9.4
chr2L	16240207	16240208	CG42817	7.4	33.3	20.35
chr2L	16240774	16240775	CG42817	2.9	3.2	3.05
chr2L	16245959	16245960	PRL-1	1.3	1.8	1.55
chr2L	16246008	16246009	PRL-1	1.4	2.2	1.8
chr2L	16246046	16246047	PRL-1	1.2	0.6	0.9
chr2L	16246151	16246152	PRL-1	1.7	1.6	1.65
chr2L	16246186	16246187	PRL-1	1.9	3.3	2.6
chr2L	16246577	16246578	PRL-1	1	0.9	0.95
chr2L	16246630	16246631	PRL-1	1	1.4	1.2
chr2L	16246673	16246674	PRL-1	1.1	1	1.05
chr2L	16246722	16246723	PRL-1	3.3	4.2	3.75
chr2L	16247059	16247060	PRL-1	1	1	1
chr2L	16249666	16249667	PRL-1	0.9	1.7	1.3
chr2L	16258755	16258756	EndoGI	12.5	2.9	7.7
chr2L	16264936	16264937	crp	1.4	2.3	1.85
chr2L	16265011	16265012	crp	1.5	1.4	1.45
chr2L	16266805	16266806	crp	1.4	13.3	7.35
chr2L	16278909	16278910	crp	1.3	6.7	4
chr2L	16289991	16289992	pkaap	2.1	2.7	2.4
chr2L	16290877	16290878	pkaap	13.8	4.3	9.05
chr2L	16297437	16297438	heix	4.8	5	4.9
chr2L	16305822	16305823	CG5861	6.9	6.9	6.9
chr2L	16305852	16305853	CG5861	6.7	5	5.85
chr2L	16306033	16306034	CG5861	2	0.7	1.35
chr2L	16306034	16306035	CG5861	1.7	0.8	1.25
chr2L	16306073	16306074	CG5861	2.5	0.7	1.6
chr2L	16306099	16306100	CG5861	2.2	0.7	1.45
chr2L	16306128	16306129	CG5861	1.7	3.9	2.8
chr2L	16306185	16306186	CG5861	5.45	1.9	3.67
chr2L	16306218	16306219	CG5861	2.3	0.8	1.55
chr2L	16306823	16306824	CG5861	3.95	3.75	3.85
chr2L	16307018	16307019	CG5861	2.7	2.3	2.5
chr2L	16308838	16308839	Syx5	1.7	1.4	1.55
chr2L	16309003	16309004	Syx5	2	1.4	1.7
chr2L	16309792	16309793	cni	1.7	0.7	1.2
chr2L	16309845	16309846	cni	3.6	5.2	4.4
chr2L	16310040	16310041	cni	2.6	2.2	2.4
chr2L	16310041	16310042	cni	6.65	4.77	5.71
chr2L	16314605	16314606	cact	1.6	1.2	1.4
chr2L	16314784	16314785	cact	1.9	1.3	1.6
chr2L	16328083	16328084	mRpL4	8.3	3	5.65
chr2L	16328215	16328216	mRpL4	1.6	1.1	1.35
chr2L	16328314	16328315	mRpL4	1.9	1.4	1.65
chr2L	16328522	16328523	mRpL4	2.3	3.9	3.1
chr2L	16342920	16342921	CG42231	3.2	3.7	3.45
chr2L	16342920	16342921	chif	3.2	3.7	3.45
chr2L	16344585	16344586	CG42231	2.9	5.3	4.1
chr2L	16344585	16344586	chif	2.9	5.3	4.1
chr2L	16348358	16348359	CG42231	2.2	9.1	5.65
chr2L	16348358	16348359	chif	2.2	9.1	5.65
chr2L	16355377	16355378	CaBP1	1.5	2	1.75
chr2L	16355737	16355738	CaBP1	2.6	1.8	2.2
chr2L	16405822	16405823	CG5888	1.6	3.8	2.7
chr2L	16466731	16466732	dac	3.2	5.7	4.45
chr2L	16468161	16468162	dac	4.8	25	14.9
chr2L	16491775	16491776	Tpr2	1.3	3.8	2.55
chr2L	16505848	16505849	Tpr2	1.3	2.3	1.8
chr2L	16505880	16505881	Tpr2	1.9	2.6	2.25
chr2L	16507311	16507312	Tpr2	1.9	1.4	1.65
chr2L	16507547	16507548	Tpr2	2.6	1.1	1.85
chr2L	1653269	1653270	chinmo	2.9	1.5	2.2
chr2L	16660493	16660494	CG42389	2.4	5.9	4.15
chr2L	16661613	16661614	CG42389	4.5	3.2	3.85
chr2L	16662080	16662081	CG42389	4.8	3.2	4
chr2L	16662246	16662247	CG42389	2.6	2	2.3
chr2L	16685809	16685810	grp	18.2	20	19.1
chr2L	16699646	16699647	grp	2.3	1.1	1.7
chr2L	16704415	16704416	CG31808	3.7	2.9	3.3
chr2L	16704433	16704434	CG31808	1.2	2.6	1.9
chr2L	16704517	16704518	CG31808	0.9	0.6	0.75
chr2L	16704624	16704625	CG31808	0.6	1.65	1.12
chr2L	16704974	16704975	CG31808	0.8	1	0.9
chr2L	16705321	16705322	CG31808	0.6	0.7	0.65
chr2L	16719944	16719945	Cyt-c-p	25	5.3	15.15
chr2L	16722525	16722526	Cyt-c-p	0.98	1.25	1.12
chr2L	16722559	16722560	Cyt-c-p	1.9	2.2	2.05
chr2L	16722585	16722586	Cyt-c-p	6.9	6.1	6.5
chr2L	16723315	16723316	VhaSFD	1.1	0.5	0.8
chr2L	16723507	16723508	VhaSFD	0.7	0.5	0.6
chr2L	16724450	16724451	VhaSFD	0.68	0.5	0.59
chr2L	16724540	16724541	VhaSFD	1	0.7	0.85
chr2L	16731574	16731575	Prosbeta4	2.3	0.8	1.55
chr2L	16732793	16732794	CG17904	2.8	2.2	2.5
chr2L	16733282	16733283	CG17904	3	2.7	2.85
chr2L	16744192	16744193	CG17912	4.2	5.9	5.05
chr2L	16752495	16752496	CG17912	2	3.1	2.55
chr2L	16789843	16789844	Cyt-b5-r	1.1	0.8	0.95
chr2L	16829737	16829738	CG31739	11.4	17.6	14.5
chr2L	16830782	16830783	CG31739	3.6	6.3	4.95
chr2L	16831554	16831555	CG31739	2	1.6	1.8
chr2L	16878240	16878241	CR31781	33.3	40	36.65
chr2L	16887253	16887254	CG6115	0.7	0.6	0.65
chr2L	16887254	16887255	CG6115	0.3	0.3	0.3
chr2L	16887346	16887347	CG6115	0.6	0.3	0.45
chr2L	16892196	16892197	tweek	6.7	50	28.35
chr2L	1690561	1690562	chinmo	2.6	2.7	2.65
chr2L	16911895	16911896	tweek	2.7	25	13.85
chr2L	16916562	16916563	tweek	1.3	1.3	1.3
chr2L	16916583	16916584	tweek	1.2	2.6	1.9
chr2L	16916627	16916628	tweek	1.7	1.3	1.5
chr2L	16976743	16976744	beat-IIIb	1.6	7.7	4.65
chr2L	16976751	16976752	beat-IIIb	1.7	3.6	2.65
chr2L	1698522	1698523	chinmo	2.5	1.5	2
chr2L	1698983	1698984	chinmo	1.9	2	1.95
chr2L	16992023	16992024	beat-IIIb	1.6	5.7	3.65
chr2L	16992726	16992727	beat-IIIb	1.8	4	2.9
chr2L	16992976	16992977	beat-IIIb	3.85	2.6	3.23
chr2L	16993003	16993004	beat-IIIb	1.3	2	1.65
chr2L	16993088	16993089	beat-IIIb	1.7	5.3	3.5
chr2L	16993289	16993290	beat-IIIb	3.05	3.7	3.38
chr2L	16993350	16993351	beat-IIIb	1.1	1.1	1.1
chr2L	16993352	16993353	beat-IIIb	1.1	1.5	1.3
chr2L	16993360	16993361	beat-IIIb	1.1	1.1	1.1
chr2L	16993390	16993391	beat-IIIb	1.3	1.6	1.45
chr2L	16993572	16993573	beat-IIIb	1.7	1.3	1.5
chr2L	16993693	16993694	beat-IIIb	4.2	3.4	3.8
chr2L	16993700	16993701	beat-IIIb	4.5	3.8	4.15
chr2L	16993707	16993708	beat-IIIb	3	1.3	2.15
chr2L	16993725	16993726	beat-IIIb	1.5	1.3	1.4
chr2L	1701257	1701258	chinmo	2.3	2.1	2.2
chr2L	1701674	1701675	chinmo	2.5	2.9	2.7
chr2L	1702359	1702360	chinmo	1.8	2.3	2.05
chr2L	1702886	1702887	chinmo	1.6	1.6	1.6
chr2L	1703350	1703351	chinmo	2.8	1.7	2.25
chr2L	1703383	1703384	chinmo	2.9	1.6	2.25
chr2L	1703619	1703620	chinmo	1.4	1	1.2
chr2L	1703698	1703699	chinmo	3.7	3	3.35
chr2L	1703841	1703842	chinmo	2	1.3	1.65
chr2L	1704407	1704408	chinmo	3.4	2.4	2.9
chr2L	1705403	1705404	cpb	5.6	5.6	5.6
chr2L	1708585	1708586	CG17660	3	4	3.5
chr2L	1710230	1710231	CG17660	5.6	7.1	6.35
chr2L	1710600	1710601	mRpL48	2.5	1.7	2.1
chr2L	1710607	1710608	mRpL48	9.1	4.3	6.7
chr2L	1710959	1710960	mRpL48	1.9	1.2	1.55
chr2L	1710986	1710987	mRpL48	3.15	2.45	2.8
chr2L	1711166	1711167	mRpL48	11.1	11.3	11.2
chr2L	1711305	1711306	mRpL48	4.3	20	12.15
chr2L	17172230	17172231	beat-IIIa	7.1	8.3	7.7
chr2L	17172230	17172231	CG34106	7.1	8.3	7.7
chr2L	17172569	17172570	beat-IIIa	3.3	2.4	2.85
chr2L	17172569	17172570	CG34106	3.3	2.4	2.85
chr2L	17187814	17187815	beat-IIIc	1.8	1.3	1.55
chr2L	17187836	17187837	beat-IIIc	24.1	17.9	21
chr2L	17188233	17188234	beat-IIIc	2.8	1.5	2.15
chr2L	17188285	17188286	beat-IIIc	5.9	3.5	4.7
chr2L	17188306	17188307	beat-IIIc	16.2	10	13.1
chr2L	17188307	17188308	beat-IIIc	47.5	42.6	45.05
chr2L	17188659	17188660	beat-IIIc	1.4	1.5	1.45
chr2L	17188703	17188704	beat-IIIc	7.1	4.9	6
chr2L	17188738	17188739	beat-IIIc	3.5	3.8	3.65
chr2L	17188833	17188834	beat-IIIc	2.7	1.4	2.05
chr2L	17189142	17189143	beat-IIIc	4.2	7.9	6.05
chr2L	17189526	17189527	beat-IIIc	5	1.4	3.2
chr2L	17189558	17189559	beat-IIIc	10	6.57	8.29
chr2L	17190297	17190298	beat-IIIc	6.3	2.8	4.55
chr2L	1724942	1724943	Eno	0.7	0.4	0.55
chr2L	1724995	1724996	Eno	0.3	0.4	0.35
chr2L	1724998	1724999	Eno	0.2	0.6	0.4
chr2L	1725030	1725031	Eno	1.1	1	1.05
chr2L	1725058	1725059	Eno	0.68	0.6	0.64
chr2L	1725076	1725077	Eno	0.2	0.1	0.15
chr2L	1730308	1730309	CG31937	6.3	5.1	5.7
chr2L	17368141	17368142	Lrch	5.6	7.1	6.35
chr2L	17373071	17373072	Lrch	2.9	5.9	4.4
chr2L	17408336	17408337	CLIP-190	4.1	13.2	8.65
chr2L	17411156	17411157	CG15141	3.1	5	4.05
chr2L	17411415	17411416	CG15141	7.7	2.7	5.2
chr2L	17413354	17413355	CG15141	3.1	3.3	3.2
chr2L	17415591	17415592	Dif	4.3	5.3	4.8
chr2L	17415595	17415596	Dif	4.2	15.8	10
chr2L	17460247	17460248	BicD	1.77	2.1	1.94
chr2L	17460672	17460673	BicD	1.8	3.1	2.45
chr2L	17463850	17463851	BicD	1.6	10	5.8
chr2L	17474236	17474237	Sgt	1.9	1.3	1.6
chr2L	17475046	17475047	Aac11	0.8	0.7	0.75
chr2L	17475050	17475051	Aac11	1.7	1.7	1.7
chr2L	17475177	17475178	Aac11	0.9	0.4	0.65
chr2L	17475416	17475417	Aac11	0.4	0.5	0.45
chr2L	17475418	17475419	Aac11	0.4	0.5	0.45
chr2L	17475437	17475438	Aac11	1.1	0.6	0.85
chr2L	17475542	17475543	Aac11	0.7	1.6	1.15
chr2L	17475678	17475679	Aac11	0.5	0.6	0.55
chr2L	17475697	17475698	Aac11	0.4	0.5	0.45
chr2L	17476750	17476751	Aac11	0.4	1.3	0.85
chr2L	17477175	17477176	Aac11	0.8	1.5	1.15
chr2L	17478895	17478896	fws	2.6	3.7	3.15
chr2L	17481285	17481286	CG5110	1.6	1	1.3
chr2L	17482583	17482584	CG6453	10.7	7.1	8.9
chr2L	17482656	17482657	CG6453	6.7	7.4	7.05
chr2L	1749967	1749968	CG17646	3	2.4	2.7
chr2L	1751125	1751126	CG17712	4.5	4.2	4.35
chr2L	17590238	17590239	Oli	2.6	1.2	1.9
chr2L	17590466	17590467	Oli	1.85	2	1.92
chr2L	17590572	17590573	Oli	5.8	5.1	5.45
chr2L	17590798	17590799	Oli	1.5	1.4	1.45
chr2L	17590882	17590883	Oli	1.5	5.7	3.6
chr2L	17591000	17591001	Oli	2.4	1.8	2.1
chr2L	17591092	17591093	Oli	1.9	1.4	1.65
chr2L	17591103	17591104	Oli	5.9	5.7	5.8
chr2L	17591126	17591127	Oli	1.7	1	1.35
chr2L	17591156	17591157	Oli	4.3	1.1	2.7
chr2L	17591165	17591166	Oli	2.2	4.7	3.45
chr2L	17602326	17602327	Sytalpha	1	2	1.5
chr2L	17602337	17602338	Sytalpha	1	1.6	1.3
chr2L	17603520	17603521	Sytalpha	2.4	2	2.2
chr2L	17603624	17603625	Sytalpha	3.8	5.5	4.65
chr2L	17603799	17603800	Sytalpha	0.9	1.6	1.25
chr2L	17603857	17603858	Sytalpha	1	0.9	0.95
chr2L	17604012	17604013	Sytalpha	1	2.7	1.85
chr2L	17604025	17604026	Sytalpha	2	1.6	1.8
chr2L	17604094	17604095	Sytalpha	1.5	0.8	1.15
chr2L	17604165	17604166	Sytalpha	1.1	2.6	1.85
chr2L	17604246	17604247	Sytalpha	4.9	1.6	3.25
chr2L	17604265	17604266	Sytalpha	3.4	1.9	2.65
chr2L	17604269	17604270	Sytalpha	2.4	1.8	2.1
chr2L	17604270	17604271	Sytalpha	2.4	1.5	1.95
chr2L	17647455	17647456	CadN	1.3	2.7	2
chr2L	17647874	17647875	CadN	1	1.5	1.25
chr2L	17647931	17647932	CadN	1	0.8	0.9
chr2L	17647942	17647943	CadN	1.2	1.5	1.35
chr2L	17648713	17648714	CadN	1.8	1.3	1.55
chr2L	17648721	17648722	CadN	3.1	1.4	2.25
chr2L	17648730	17648731	CadN	1	1.4	1.2
chr2L	17648780	17648781	CadN	1	1.3	1.15
chr2L	17648883	17648884	CadN	0.8	0.9	0.85
chr2L	17649000	17649001	CadN	2.4	2	2.2
chr2L	17649189	17649190	CadN	9	5.6	7.3
chr2L	17649734	17649735	CadN	1.2	4.4	2.8
chr2L	17649938	17649939	CadN	1.8	1.6	1.7
chr2L	17650329	17650330	CadN	1.3	5.1	3.2
chr2L	17651010	17651011	CadN	1.5	5.1	3.3
chr2L	17651362	17651363	CadN	1.4	5	3.2
chr2L	17655780	17655781	CadN	5.2	5.7	5.45
chr2L	17655900	17655901	CadN	1.4	3.8	2.6
chr2L	17657710	17657711	CadN	2.3	5	3.65
chr2L	17657946	17657947	CadN	2.4	8	5.2
chr2L	17658606	17658607	CadN	1.4	11.1	6.25
chr2L	17787194	17787195	CadN2	2.3	2.6	2.45
chr2L	17787407	17787408	CadN2	2.8	5.9	4.35
chr2L	17788530	17788531	CadN2	3.3	5	4.15
chr2L	17797538	17797539	CadN2	2.6	10	6.3
chr2L	17810880	17810881	CadN2	4.5	20	12.25
chr2L	17969468	17969469	CG5674	6.7	28.6	17.65
chr2L	17973563	17973564	CG5674	4.8	5	4.9
chr2L	17974055	17974056	btv	5.6	3.2	4.4
chr2L	17974124	17974125	btv	2.9	2.7	2.8
chr2L	18129148	18129149	CG5758	0.22	0.3	0.26
chr2L	18129271	18129272	CG5758	0.3	0.28	0.29
chr2L	18129332	18129333	CG5758	0.3	0.2	0.25
chr2L	18129333	18129334	CG5758	0.3	0.28	0.29
chr2L	18129529	18129530	CG5758	0.3	0.3	0.3
chr2L	18129585	18129586	CG5758	0.3	0.2	0.25
chr2L	18129679	18129680	CG5758	0.3	0.2	0.25
chr2L	18130732	18130733	kel	11.1	11.1	11.1
chr2L	18141010	18141011	Socs36E	7.1	7.7	7.4
chr2L	18152077	18152078	Socs36E	5.3	10	7.65
chr2L	18160031	18160032	CG42750	2.6	3	2.8
chr2L	18160075	18160076	CG42750	1.6	4.4	3
chr2L	18160257	18160258	CG42750	11.8	5.5	8.65
chr2L	18160261	18160262	CG42750	2.9	7.3	5.1
chr2L	18161013	18161014	CG42750	5.2	8.3	6.75
chr2L	18181720	18181721	CG42750	1.9	2.1	2
chr2L	18181720	18181721	CG7180	1.9	2.1	2
chr2L	18182539	18182540	CG42750	2	3.7	2.85
chr2L	18182539	18182540	CG7180	2	3.7	2.85
chr2L	18182706	18182707	CG42750	1.9	3.7	2.8
chr2L	18182706	18182707	CG7180	1.9	3.7	2.8
chr2L	18203921	18203922	CG42750	5.9	11.1	8.5
chr2L	18210968	18210969	CG42750	2.2	9.1	5.65
chr2L	18271823	18271824	CG42750	2.2	1.6	1.9
chr2L	18271925	18271926	CG42750	2.2	2.6	2.4
chr2L	18275767	18275768	CG42750	3.3	12.9	8.1
chr2L	18383892	18383893	Fas3	7.7	6.3	7
chr2L	18392327	18392328	Fas3	10.7	6.7	8.7
chr2L	184093	184094	spen	6.3	33.3	19.8
chr2L	1842898	1842899	wry	0.3	3.4	1.85
chr2L	18442209	18442210	RpS26	100	33.3	66.65
chr2L	18442265	18442266	RpS26	5.6	5.3	5.45
chr2L	1844240	1844241	wry	1.1	3.6	2.35
chr2L	18442508	18442509	RpS26	2.5	1.55	2.02
chr2L	18442515	18442516	RpS26	2.6	1.3	1.95
chr2L	1844255	1844256	wry	0.6	5	2.8
chr2L	1844408	1844409	wry	0.4	1.8	1.1
chr2L	18445007	18445008	ncm	4.3	6.3	5.3
chr2L	18447289	18447290	ncm	9.1	25	17.05
chr2L	18449705	18449706	bsf	13.3	2.6	7.95
chr2L	18450134	18450135	bsf	2	5.3	3.65
chr2L	18451204	18451205	bsf	3	8.3	5.65
chr2L	18451958	18451959	bsf	4.8	7.7	6.25
chr2L	18473327	18473328	CG10283	5.9	6.15	6.03
chr2L	18474311	18474312	CG10283	9.1	20	14.55
chr2L	18532537	18532538	Pde11	4.7	1.6	3.15
chr2L	18532787	18532788	Pde11	4	2.6	3.3
chr2L	18532996	18532997	Pde11	1.8	2.3	2.05
chr2L	1856547	1856548	wry	0.5	1	0.75
chr2L	1857046	1857047	wry	0.5	0.9	0.7
chr2L	1857056	1857057	wry	0.4	2.6	1.5
chr2L	1857119	1857120	wry	0.48	0.75	0.62
chr2L	1857247	1857248	wry	0.2	0.4	0.3
chr2L	1857581	1857582	wry	0.5	0.6	0.55
chr2L	1857858	1857859	wry	1.1	0.6	0.85
chr2L	1858034	1858035	wry	2.4	1	1.7
chr2L	1858042	1858043	wry	0.9	1	0.95
chr2L	1858248	1858249	wry	0.5	0.4	0.45
chr2L	1858259	1858260	wry	0.5	0.4	0.45
chr2L	1858327	1858328	wry	1.1	0.5	0.8
chr2L	1858338	1858339	wry	0.9	0.7	0.8
chr2L	1858394	1858395	wry	1	1.4	1.2
chr2L	18600132	18600133	CG10413	2.6	3.1	2.85
chr2L	18600215	18600216	CG10413	2.7	2.6	2.65
chr2L	18600397	18600398	CG10413	10	26.9	18.45
chr2L	18600610	18600611	CG10413	3.2	6.7	4.95
chr2L	18600678	18600679	CG10413	2.3	1.8	2.05
chr2L	18601252	18601253	CG10413	8.7	5.6	7.15
chr2L	1865584	1865585	CG31663	1.1	1.6	1.35
chr2L	18679127	18679128	CG31751	1.3	1.4	1.35
chr2L	18682944	18682945	CG31751	1.1	1.2	1.15
chr2L	18683229	18683230	CG31751	4.08	1.75	2.92
chr2L	18683242	18683243	CG31751	5.9	1.8	3.85
chr2L	18683251	18683252	CG31751	2.9	2.2	2.55
chr2L	18685060	18685061	msl-1	16.7	10	13.35
chr2L	18698136	18698137	CG10338	2	2.7	2.35
chr2L	18698290	18698291	CG10338	15	3	9
chr2L	18700792	18700793	CG10376	3.4	3.7	3.55
chr2L	18700907	18700908	CG10376	7.1	5.3	6.2
chr2L	18703598	18703599	CG10343	19	4	11.5
chr2L	18704677	18704678	Jwa	1.4	0.6	1
chr2L	18706358	18706359	Faf	1.6	1	1.3
chr2L	18706451	18706452	Faf	6.28	3.72	5
chr2L	18707262	18707263	Faf	1.9	2.8	2.35
chr2L	18711605	18711606	Irk3	2.9	1.1	2
chr2L	187571	187572	spen	4	20	12
chr2L	18831383	18831384	ScpX	5	2.1	3.55
chr2L	18832751	18832752	ScpX	2.2	1.7	1.95
chr2L	18833512	18833513	ScpX	2.3	1.9	2.1
chr2L	18836829	18836830	CG10600	2.9	9.1	6
chr2L	18845461	18845462	CG17321	1.3	3.2	2.25
chr2L	18845857	18845858	CG17321	3.1	6.1	4.6
chr2L	18852979	18852980	CG17321	1.8	5.3	3.55
chr2L	18853578	18853579	CG17321	0.9	1.9	1.4
chr2L	18853993	18853994	CG17321	1.85	5.7	3.78
chr2L	18854495	18854496	CG17321	5.62	3.92	4.77
chr2L	18854537	18854538	CG17321	0.8	1.1	0.95
chr2L	18854563	18854564	CG17321	2.9	2.8	2.85
chr2L	18854652	18854653	CG17321	1.8	0.9	1.35
chr2L	18854742	18854743	CG17321	0.8	3.2	2
chr2L	18854808	18854809	CG17321	0.9	2.1	1.5
chr2L	18854875	18854876	CG17321	0.9	1.8	1.35
chr2L	18854889	18854890	CG17321	0.8	0.8	0.8
chr2L	18854988	18854989	CG17321	1.3	0.8	1.05
chr2L	18856587	18856588	CG10602	4.5	6.3	5.4
chr2L	18858422	18858423	CG10602	2.2	1.9	2.05
chr2L	18858422	18858423	mRpL13	2.2	1.9	2.05
chr2L	18859005	18859006	CG10602	2.67	1	1.84
chr2L	18859005	18859006	mRpL13	2.67	1	1.84
chr2L	18949207	18949208	CG10428	5.3	5.6	5.45
chr2L	18949570	18949571	CG10428	6.3	18.2	12.25
chr2L	18958268	18958269	Nak	5.3	2.3	3.8
chr2L	18964702	18964703	Nak	2.2	10	6.1
chr2L	18972067	18972068	CG10639	5.9	6.3	6.1
chr2L	18973998	18973999	CG10639	3.1	2.1	2.6
chr2L	18977574	18977575	Swip-1	4.7	1.1	2.9
chr2L	18977579	18977580	Swip-1	4.3	5.2	4.75
chr2L	18977596	18977597	Swip-1	1.6	0.9	1.25
chr2L	18977609	18977610	Swip-1	10.32	14.05	12.19
chr2L	18977691	18977692	CG10431	1.4	0.8	1.1
chr2L	18977868	18977869	Swip-1	2.7	1.1	1.9
chr2L	18977871	18977872	CG10431	3.8	2.2	3
chr2L	18978031	18978032	Swip-1	1	2.5	1.75
chr2L	18978081	18978082	Swip-1	0.8	0.7	0.75
chr2L	18978088	18978089	Swip-1	5.4	2.3	3.85
chr2L	18978155	18978156	Swip-1	7	5.3	6.15
chr2L	18978230	18978231	Swip-1	0.6	0.6	0.6
chr2L	18978454	18978455	Swip-1	0.7	1.5	1.1
chr2L	18978506	18978507	Swip-1	1.7	0.8	1.25
chr2L	18987051	18987052	Swip-1	0.9	3.2	2.05
chr2L	18987733	18987734	CG15168	5.3	13.47	9.38
chr2L	18988280	18988281	CG15170	2.9	1.3	2.1
chr2L	189975	189976	spen	2.2	2	2.1
chr2L	190073	190074	spen	1.6	0.7	1.15
chr2L	19008128	19008129	RpL30	3.2	2.2	2.7
chr2L	19008356	19008357	RpL30	0.3	0.5	0.4
chr2L	19008367	19008368	RpL30	1	0.7	0.85
chr2L	19009214	19009215	RpL30	1.1	0.7	0.9
chr2L	190156	190157	spen	1.7	0.5	1.1
chr2L	190159	190160	spen	1.6	0.6	1.1
chr2L	190203	190204	spen	1.7	0.6	1.15
chr2L	190302	190303	spen	3	0.7	1.85
chr2L	19030888	19030889	hk	8.3	2.4	5.35
chr2L	19030976	19030977	hk	3.4	2.7	3.05
chr2L	19031069	19031070	hk	1.3	0.6	0.95
chr2L	19031229	19031230	hk	13.3	7	10.15
chr2L	19031436	19031437	hk	1.2	1.1	1.15
chr2L	19031445	19031446	hk	1.1	1.3	1.2
chr2L	19031564	19031565	hk	1	1.6	1.3
chr2L	19031708	19031709	hk	1.6	1.3	1.45
chr2L	19031759	19031760	hk	1.7	1.3	1.5
chr2L	19031831	19031832	hk	0.9	1.6	1.25
chr2L	19031977	19031978	hk	1	1.2	1.1
chr2L	19033349	19033350	hk	0.7	3.1	1.9
chr2L	190342	190343	spen	1.9	0.8	1.35
chr2L	19039479	19039480	mib2	2	4.8	3.4
chr2L	19040906	19040907	mib2	1.7	2.2	1.95
chr2L	19041008	19041009	mib2	3.1	4.1	3.6
chr2L	19041110	19041111	mib2	2.7	2.9	2.8
chr2L	19046083	19046084	Acn	0.6	2.1	1.35
chr2L	19046453	19046454	Acn	0.9	2.2	1.55
chr2L	19047510	19047511	Acn	0.6	2.1	1.35
chr2L	19048046	19048047	Acn	0.7	1	0.85
chr2L	19048452	19048453	Acn	1.1	1.4	1.25
chr2L	19048555	19048556	Acn	5.3	3.8	4.55
chr2L	19048571	19048572	Acn	1.2	1.4	1.3
chr2L	19048591	19048592	Acn	2.77	2.15	2.46
chr2L	19049971	19049972	l(2)37Bb	7.7	8.9	8.3
chr2L	19050023	19050024	l(2)37Bb	3.6	1.2	2.4
chr2L	19050852	19050853	l(2)37Bb	6.9	4.8	5.85
chr2L	19052531	19052532	Rpn3	2	3.3	2.65
chr2L	19053429	19053430	Rpn3	2.5	1.4	1.95
chr2L	19053546	19053547	Rpn3	2.9	2.9	2.9
chr2L	19057391	19057392	CG10492	2.5	8.3	5.4
chr2L	19058197	19058198	CG10492	2	3.8	2.9
chr2L	19058249	19058250	CG10492	2.9	5.7	4.3
chr2L	19058602	19058603	CG10492	4	7	5.5
chr2L	19058742	19058743	CG10492	8.3	3.8	6.05
chr2L	190791	190792	spen	2.6	2.8	2.7
chr2L	19114910	19114911	CG10561	5.6	12.5	9.05
chr2L	19114911	19114912	CG10561	31.02	11.43	21.23
chr2L	19115582	19115583	CG10561	2.6	3.1	2.85
chr2L	19116019	19116020	CG10561	3.6	2	2.8
chr2L	19116508	19116509	CG10561	3	1.1	2.05
chr2L	19116511	19116512	CG10561	1.2	1.9	1.55
chr2L	19116938	19116939	Ddc	0.6	0.6	0.6
chr2L	19119315	19119316	Ddc	0.7	1.8	1.25
chr2L	19119392	19119393	Ddc	0.5	1.1	0.8
chr2L	19119394	19119395	Ddc	0.5	1	0.75
chr2L	19120184	19120185	Ddc	0.4	0.8	0.6
chr2L	19122288	19122289	l(2)37Cc	1.15	1.25	1.2
chr2L	19123779	19123780	l(2)37Cc	1.9	0.7	1.3
chr2L	19130056	19130057	Aats-asn	4.5	3.2	3.85
chr2L	19132732	19132733	l(2)37Ce	2.2	1	1.6
chr2L	19132745	19132746	l(2)37Ce	2.4	2	2.2
chr2L	19174740	19174741	brat	3.8	4.3	4.05
chr2L	19175184	19175185	brat	4	3.4	3.7
chr2L	19175803	19175804	brat	2.7	5.6	4.15
chr2L	19177497	19177498	brat	2.7	2.3	2.5
chr2L	19178201	19178202	brat	1.5	1.3	1.4
chr2L	19178225	19178226	brat	2.1	1.5	1.8
chr2L	19179395	19179396	brat	14.3	8.7	11.5
chr2L	19188332	19188333	pigeon	13	13	13
chr2L	19190745	19190746	drl	17.4	18.8	18.1
chr2L	19208324	19208325	drl	2.4	3.8	3.1
chr2L	19208375	19208376	drl	2.1	2.1	2.1
chr2L	19401094	19401095	Pax	4.2	10.5	7.35
chr2L	19401181	19401182	Pax	5.3	16.7	11
chr2L	1941758	1941759	CG7337	2.8	5.9	4.35
chr2L	19426238	19426239	Pax	4.5	28.6	16.55
chr2L	194284	194285	spen	1.8	14.3	8.05
chr2L	19431406	19431407	CG9987	4.5	4	4.25
chr2L	19443446	19443447	Hs2st	7.7	3.6	5.65
chr2L	19447687	19447688	Top2	3.3	11.6	7.45
chr2L	19447765	19447766	Top2	3.2	3.6	3.4
chr2L	19448594	19448595	Top2	1.8	4.8	3.3
chr2L	19490847	19490848	CG18094	14.3	25	19.65
chr2L	19496470	19496471	swm	2.1	3	2.55
chr2L	19497251	19497252	swm	1.3	1.3	1.3
chr2L	19502713	19502714	CG10188	1.8	1.9	1.85
chr2L	19502736	19502737	CG10188	2.4	2.9	2.65
chr2L	19502908	19502909	CG10188	1.4	1.4	1.4
chr2L	19503194	19503195	CG10188	1.6	2.3	1.95
chr2L	19503429	19503430	CG10188	3.6	3.4	3.5
chr2L	19503870	19503871	CG10188	2.7	5.3	4
chr2L	19504142	19504143	CG10188	3.6	20	11.8
chr2L	19508981	19508982	CG10186	1.2	1.1	1.15
chr2L	19509000	19509001	CG10186	0.5	1.5	1
chr2L	19509130	19509131	CG10186	0.5	0.9	0.7
chr2L	19509159	19509160	CG10186	0.5	0.78	0.64
chr2L	19509190	19509191	CG10186	2.9	1.6	2.25
chr2L	19509297	19509298	CG10186	2.73	2.4	2.56
chr2L	19509309	19509310	CG10186	0.55	0.3	0.43
chr2L	19509318	19509319	CG10186	1.65	0.65	1.15
chr2L	19510421	19510422	CG10186	0.5	1.7	1.1
chr2L	19512025	19512026	CG10186	0.43	0.4	0.42
chr2L	19512258	19512259	CG10186	0.2	0.5	0.35
chr2L	19514528	19514529	CG10186	0.5	0.7	0.6
chr2L	19514534	19514535	CG10186	1.9	1	1.45
chr2L	19520642	19520643	CG10132	4	6.5	5.25
chr2L	19520864	19520865	CG10132	1.7	4.3	3
chr2L	1952101	1952102	erm	8.3	22.2	15.25
chr2L	19521349	19521350	CG10132	2.6	8.3	5.45
chr2L	19521590	19521591	CG10132	1.2	6.3	3.75
chr2L	19522804	19522805	CG10132	3.3	3.6	3.45
chr2L	19522930	19522931	CG10132	2.8	3.8	3.3
chr2L	19524288	19524289	CG10132	7.47	12.95	10.21
chr2L	19524765	19524766	CG10132	3	1.2	2.1
chr2L	19525044	19525045	CG10132	1.2	1.7	1.45
chr2L	19525297	19525298	CG10132	4.1	2.3	3.2
chr2L	19526070	19526071	CG10166	3	1.4	2.2
chr2L	19526251	19526252	CG10166	2.6	2.6	2.6
chr2L	19529665	19529666	CG10137	2.1	4.2	3.15
chr2L	19531180	19531181	CG10137	2.52	4.2	3.36
chr2L	19531723	19531724	CG10137	1.9	3.3	2.6
chr2L	19532920	19532921	CG10137	11.1	9.1	10.1
chr2L	19536784	19536785	CG33116	3.4	2.1	2.75
chr2L	19536927	19536928	CG33116	5	13.2	9.1
chr2L	19542611	19542612	ref(2)P	1.4	1.3	1.35
chr2L	19542868	19542869	ref(2)P	1.7	2.5	2.1
chr2L	19543745	19543746	ref(2)P	0.9	1.3	1.1
chr2L	19545399	19545400	CG10337	0.7	0.4	0.55
chr2L	19545511	19545512	CG10337	1.6	1.3	1.45
chr2L	19568169	19568170	spi	1.5	0.4	0.95
chr2L	19568292	19568293	spi	1.3	0.6	0.95
chr2L	19568452	19568453	spi	1.95	0.85	1.4
chr2L	19568482	19568483	spi	1.1	0.5	0.8
chr2L	19569168	19569169	spi	1	0.9	0.95
chr2L	19569221	19569222	spi	0.8	0.8	0.8
chr2L	19569483	19569484	spi	6.3	20	13.15
chr2L	19571604	19571605	spi	1.9	2	1.95
chr2L	19579313	19579314	CG10268	6.7	6.9	6.8
chr2L	19581185	19581186	Hakai	14.3	6.7	10.5
chr2L	19581593	19581594	Hakai	14.3	4.3	9.3
chr2L	19583142	19583143	CG10262	9.1	2.8	5.95
chr2L	19584462	19584463	CG10366	6.5	6.3	6.4
chr2L	19584849	19584850	CG10366	25	23.5	24.25
chr2L	19585194	19585195	CG10366	2.2	4.2	3.2
chr2L	19586060	19586061	CG10366	5.9	3.1	4.5
chr2L	19603900	19603901	CR44978	7.7	4.3	6
chr2L	19606752	19606753	Lar	2.8	4.3	3.55
chr2L	19611054	19611055	Lar	3.6	3.6	3.6
chr2L	196518	196519	spen	1.4	20	10.7
chr2L	19727037	19727038	Lar	0.6	8.3	4.45
chr2L	19728112	19728113	Lar	12.4	6.7	9.55
chr2L	19730386	19730387	Lar	2.3	2.2	2.25
chr2L	19730819	19730820	Lar	1.3	1.6	1.45
chr2L	19730869	19730870	Lar	0.6	1.8	1.2
chr2L	19730901	19730902	Lar	0.5	1.1	0.8
chr2L	19730987	19730988	Lar	1.2	1.7	1.45
chr2L	19731608	19731609	Lar	3.17	2.4	2.79
chr2L	19731752	19731753	Lar	1.3	1.4	1.35
chr2L	19731786	19731787	Lar	22.7	20.8	21.75
chr2L	19731876	19731877	Lar	0.5	0.6	0.55
chr2L	19731924	19731925	Lar	0.7	3.3	2
chr2L	19736187	19736188	Nf-YB	1.9	2.1	2
chr2L	19736947	19736948	Nf-YB	6.7	12.3	9.5
chr2L	19736962	19736963	Nf-YB	10.5	1.9	6.2
chr2L	1974225	1974226	Der-1	0.8	0.7	0.75
chr2L	19743281	19743282	CG10631	21.4	25	23.2
chr2L	19743616	19743617	CG10631	2.9	16.7	9.8
chr2L	19744048	19744049	CG10631	1.3	11.5	6.4
chr2L	1974473	1974474	Der-1	1.4	1.3	1.35
chr2L	19744907	19744908	CG10631	1.3	4	2.65
chr2L	1975294	1975295	Der-1	1.9	0.8	1.35
chr2L	1975316	1975317	Der-1	2.6	2	2.3
chr2L	1976173	1976174	CG15356	3.4	8.3	5.85
chr2L	19793034	19793035	fs(2)ltoPP43	7.1	2.9	5
chr2L	19793374	19793375	fs(2)ltoPP43	4.3	16.7	10.5
chr2L	19794687	19794688	fs(2)ltoPP43	5.6	7.4	6.5
chr2L	19794720	19794721	fs(2)ltoPP43	2.9	2.5	2.7
chr2L	1982470	1982471	CG7289	5.1	13.3	9.2
chr2L	1983782	1983783	CG7289	4.7	2.9	3.8
chr2L	1983905	1983906	CG7289	4.7	2.6	3.65
chr2L	1985327	1985328	Got2	0.9	0.5	0.7
chr2L	1985982	1985983	Got2	0.7	0.5	0.6
chr2L	1986019	1986020	Got2	0.88	0.6	0.74
chr2L	199111	199112	spen	1.5	25	13.25
chr2L	19925683	19925684	sick	11.5	50	30.75
chr2L	19956185	19956186	sick	2.2	7.1	4.65
chr2L	19957583	19957584	sick	1.6	3.1	2.35
chr2L	19957700	19957701	sick	4	13.2	8.6
chr2L	19957940	19957941	sick	30	40.7	35.35
chr2L	19958130	19958131	sick	2.4	2.3	2.35
chr2L	19959328	19959329	CoIV	0.2	0.25	0.22
chr2L	19971644	19971645	CG43861	7.7	33.3	20.5
chr2L	1997340	1997341	CG33543	2.9	1.7	2.3
chr2L	1997461	1997462	CG33543	9.7	17	13.35
chr2L	1997636	1997637	CG33543	0.7	0.9	0.8
chr2L	1998326	1998327	CG33543	7.12	4.65	5.88
chr2L	1998491	1998492	CG33543	1.8	8.9	5.35
chr2L	1998500	1998501	CG33543	3	1.5	2.25
chr2L	1998588	1998589	CG33543	1.1	1.6	1.35
chr2L	2001048	2001049	CR43464	1	8.9	4.95
chr2L	20027985	20027986	sNPF	0.5	0.4	0.45
chr2L	20054505	20054506	sNPF	0.6	1.1	0.85
chr2L	20054672	20054673	sNPF	0.8	0.7	0.75
chr2L	20055314	20055315	sNPF	1.68	1	1.34
chr2L	20055344	20055345	sNPF	22	31.1	26.55
chr2L	20055407	20055408	sNPF	0.9	2.4	1.65
chr2L	20055435	20055436	sNPF	1.18	0.78	0.98
chr2L	20055439	20055440	sNPF	2.2	1.4	1.8
chr2L	20055461	20055462	sNPF	0.5	1.3	0.9
chr2L	20055471	20055472	sNPF	0.5	0.5	0.5
chr2L	20055472	20055473	sNPF	0.5	1	0.75
chr2L	20055487	20055488	sNPF	0.5	0.4	0.45
chr2L	20055508	20055509	sNPF	0.5	1.8	1.15
chr2L	20055509	20055510	sNPF	4.5	4	4.25
chr2L	20055740	20055741	sNPF	0.4	0.8	0.6
chr2L	20055776	20055777	sNPF	1.4	3.2	2.3
chr2L	20055779	20055780	sNPF	0.5	0.6	0.55
chr2L	20055787	20055788	sNPF	9.4	8.12	8.76
chr2L	20055815	20055816	sNPF	1.4	0.2	0.8
chr2L	20055842	20055843	sNPF	0.9	1.8	1.35
chr2L	20055870	20055871	sNPF	0.4	0.4	0.4
chr2L	20055875	20055876	sNPF	0.4	0.7	0.55
chr2L	20055894	20055895	sNPF	0.7	0.2	0.45
chr2L	20055899	20055900	sNPF	1.4	1.4	1.4
chr2L	20055910	20055911	sNPF	0.5	0.5	0.5
chr2L	20055912	20055913	sNPF	2.4	3.6	3
chr2L	20055929	20055930	sNPF	0.5	0.3	0.4
chr2L	20055936	20055937	sNPF	0.5	0.3	0.4
chr2L	20055941	20055942	sNPF	0.6	0.3	0.45
chr2L	20055959	20055960	sNPF	0.7	0.5	0.6
chr2L	20055971	20055972	sNPF	1.5	1.3	1.4
chr2L	20055981	20055982	sNPF	0.8	1	0.9
chr2L	20055998	20055999	sNPF	8.08	4.67	6.38
chr2L	20056000	20056001	sNPF	2	2.1	2.05
chr2L	20056004	20056005	sNPF	1	0.5	0.75
chr2L	20056006	20056007	sNPF	1	2.7	1.85
chr2L	20056010	20056011	sNPF	3	2.1	2.55
chr2L	20056012	20056013	sNPF	6.8	1.1	3.95
chr2L	20056018	20056019	sNPF	55.4	48.1	51.75
chr2L	20056049	20056050	sNPF	0.7	0.8	0.75
chr2L	20056086	20056087	sNPF	0.8	0.9	0.85
chr2L	20056103	20056104	sNPF	0.9	0.5	0.7
chr2L	20056112	20056113	sNPF	1.8	4.5	3.15
chr2L	20056132	20056133	sNPF	1.6	0.8	1.2
chr2L	20056136	20056137	sNPF	0.8	0.9	0.85
chr2L	20056138	20056139	sNPF	0.8	0.4	0.6
chr2L	20056144	20056145	sNPF	1.85	0.3	1.07
chr2L	20056161	20056162	sNPF	0.8	0.3	0.55
chr2L	20056183	20056184	sNPF	0.7	1	0.85
chr2L	20056196	20056197	sNPF	0.7	0.3	0.5
chr2L	20056201	20056202	sNPF	0.75	0.32	0.54
chr2L	20056213	20056214	sNPF	2.3	0.4	1.35
chr2L	20056321	20056322	sNPF	11.7	8.5	10.1
chr2L	20056326	20056327	sNPF	2.1	1.1	1.6
chr2L	20065066	20065067	vls	7.1	10	8.55
chr2L	20066477	20066478	bwa	6.3	3.3	4.8
chr2L	20066595	20066596	bwa	2.8	4.2	3.5
chr2L	20072703	20072704	bwa	3.1	2.95	3.03
chr2L	20074215	20074216	pr	2.1	3.6	2.85
chr2L	20074300	20074301	pr	1.7	1.3	1.5
chr2L	20081761	20081762	neb	2	0.9	1.45
chr2L	20081770	20081771	neb	1.1	0.6	0.85
[truncated: 30,623 more rows]

## Sheet: Del LsmAD Brain
chrom	start	end	Gene	Replicate 1 Edit Percentage	Replicate 2 Edit Percentage	Average Edit Percentage
chr2L	10004538	10004539	CG4747	1.2	1.3	1.25
chr2L	10005574	10005575	CG4747	1	1.8	1.4
chr2L	10007333	10007334	CG4747	1.3	3.1	2.2
chr2L	10008418	10008419	CG4747	2.2	3.1	2.65
chr2L	10012514	10012515	Trp1	0.8	2.2	1.5
chr2L	10012538	10012539	Trp1	0.8	1.5	1.15
chr2L	10012775	10012776	Trp1	0.9	7.1	4
chr2L	10012805	10012806	Trp1	0.8	1.3	1.05
chr2L	1008440	1008441	IA-2	2.3	0.5	1.4
chr2L	1008468	1008469	IA-2	0.2	3	1.6
chr2L	1008525	1008526	IA-2	1.38	1.88	1.63
chr2L	1008583	1008584	IA-2	2.2	1.2	1.7
chr2L	1008625	1008626	IA-2	0.3	0.4	0.35
chr2L	1008639	1008640	IA-2	2.6	4.35	3.47
chr2L	1008649	1008650	IA-2	0.4	0.3	0.35
chr2L	1008687	1008688	IA-2	13.7	12.7	13.2
chr2L	1008688	1008689	IA-2	9.5	9.7	9.6
chr2L	1008689	1008690	IA-2	7.4	6.3	6.85
chr2L	1008690	1008691	IA-2	0.6	1.6	1.1
chr2L	1008691	1008692	IA-2	0.2	0.3	0.25
chr2L	1008692	1008693	IA-2	1.65	2.35	2
chr2L	1008710	1008711	IA-2	0.2	0.3	0.25
chr2L	1008715	1008716	IA-2	0.2	0.2	0.2
chr2L	1008735	1008736	IA-2	0.8	0.3	0.55
chr2L	1008737	1008738	IA-2	0.8	0.6	0.7
chr2L	1008751	1008752	IA-2	0.2	0.4	0.3
chr2L	1008752	1008753	IA-2	1.6	0.6	1.1
chr2L	1008759	1008760	IA-2	0.5	1.5	1
chr2L	1008778	1008779	IA-2	0.5	0.3	0.4
chr2L	1008912	1008913	IA-2	0.3	0.3	0.3
chr2L	1008914	1008915	IA-2	0.3	0.3	0.3
chr2L	1008932	1008933	IA-2	0.2	0.5	0.35
chr2L	1008982	1008983	IA-2	2	0.8	1.4
chr2L	1008993	1008994	IA-2	6.1	6.1	6.1
chr2L	1009009	1009010	IA-2	3.03	1.5	2.26
chr2L	1009080	1009081	IA-2	5.9	16.7	11.3
chr2L	1009081	1009082	IA-2	11.8	8.3	10.05
chr2L	1009109	1009110	IA-2	0.4	2.3	1.35
chr2L	1009110	1009111	IA-2	0.4	0.6	0.5
chr2L	1009138	1009139	IA-2	2.85	3.23	3.04
chr2L	1009189	1009190	IA-2	1	0.6	0.8
chr2L	1009209	1009210	IA-2	0.3	0.4	0.35
chr2L	1009218	1009219	IA-2	0.3	1.45	0.88
chr2L	1009219	1009220	IA-2	0.8	0.4	0.6
chr2L	1009220	1009221	IA-2	1	1.2	1.1
chr2L	1009223	1009224	IA-2	0.5	1.2	0.85
chr2L	1009244	1009245	IA-2	0.2	0.7	0.45
chr2L	1009382	1009383	IA-2	0.57	0.38	0.48
chr2L	1009414	1009415	IA-2	1.05	1.43	1.24
chr2L	1009424	1009425	IA-2	2	2.9	2.45
chr2L	1009440	1009441	IA-2	27	28.7	27.85
chr2L	1009454	1009455	IA-2	0.6	1.4	1
chr2L	1009463	1009464	IA-2	0.7	0.92	0.81
chr2L	1009585	1009586	IA-2	0.57	0.57	0.57
chr2L	1009605	1009606	IA-2	0.32	0.48	0.4
chr2L	1009690	1009691	IA-2	0.9	0.85	0.88
chr2L	1009711	1009712	IA-2	0.2	0.4	0.3
chr2L	1009783	1009784	IA-2	1.4	1.5	1.45
chr2L	10097970	10097971	CG44153	4.3	9.1	6.7
chr2L	1009818	1009819	IA-2	0.2	0.4	0.3
chr2L	1009825	1009826	IA-2	0.2	0.3	0.25
chr2L	1009833	1009834	IA-2	0.4	0.1	0.25
chr2L	1009834	1009835	IA-2	0.3	0.2	0.25
chr2L	1009839	1009840	IA-2	0.5	1.1	0.8
chr2L	1009853	1009854	IA-2	0.62	0.52	0.57
chr2L	1009854	1009855	IA-2	0.7	0.5	0.6
chr2L	1009855	1009856	IA-2	0.45	0.65	0.55
chr2L	1009876	1009877	IA-2	0.2	0.1	0.15
chr2L	1009878	1009879	IA-2	0.22	0.1	0.16
chr2L	1009894	1009895	IA-2	0.3	0.1	0.2
chr2L	1009901	1009902	IA-2	0.1	0.1	0.1
chr2L	1009909	1009910	IA-2	0.1	0.1	0.1
chr2L	1009914	1009915	IA-2	0.4	0.1	0.25
chr2L	1009915	1009916	IA-2	0.1	0.7	0.4
chr2L	1009932	1009933	IA-2	0.1	0.3	0.2
chr2L	1009945	1009946	IA-2	0.1	0.1	0.1
chr2L	1009955	1009956	IA-2	0.25	0.25	0.25
chr2L	1009962	1009963	IA-2	0.28	0.2	0.24
chr2L	1009973	1009974	IA-2	5.8	7.88	6.84
chr2L	1009974	1009975	IA-2	0.5	0.5	0.5
chr2L	1009999	1010000	IA-2	0.12	0.38	0.25
chr2L	1010005	1010006	IA-2	0.2	0.5	0.35
chr2L	1010011	1010012	IA-2	0.62	0.38	0.5
chr2L	1010018	1010019	IA-2	0.4	0.25	0.32
chr2L	1010029	1010030	IA-2	0.1	0.1	0.1
chr2L	1010047	1010048	IA-2	0.1	0.2	0.15
chr2L	1010052	1010053	IA-2	0.15	0.2	0.18
chr2L	1010053	1010054	IA-2	0.55	0.55	0.55
chr2L	1010054	1010055	IA-2	0.7	0.6	0.65
chr2L	1010058	1010059	IA-2	0.8	1.2	1
chr2L	1010060	1010061	IA-2	0.9	2	1.45
chr2L	1010062	1010063	IA-2	2.88	4.62	3.75
chr2L	1010070	1010071	IA-2	0.6	0.9	0.75
chr2L	1010072	1010073	IA-2	0.88	1.2	1.04
chr2L	1010074	1010075	IA-2	1.05	1.08	1.06
chr2L	1010094	1010095	IA-2	0.4	0.52	0.46
chr2L	1010096	1010097	IA-2	0.2	0.4	0.3
chr2L	1010098	1010099	IA-2	0.15	0.25	0.2
chr2L	1010125	1010126	IA-2	0.1	0	0.05
chr2L	1010151	1010152	IA-2	0.1	0.1	0.1
chr2L	1010357	1010358	IA-2	0	0.1	0.05
chr2L	1010384	1010385	IA-2	0.05	0.1	0.08
chr2L	1010424	1010425	IA-2	0.15	0.2	0.18
chr2L	1010435	1010436	IA-2	0.1	0.25	0.18
chr2L	1010439	1010440	IA-2	0.08	0.1	0.09
chr2L	1010450	1010451	IA-2	0.18	0.18	0.18
chr2L	1010469	1010470	IA-2	0	0.3	0.15
chr2L	1010504	1010505	IA-2	0.55	0.75	0.65
chr2L	1010515	1010516	IA-2	0.4	0.75	0.57
chr2L	1010516	1010517	IA-2	1	0.35	0.68
chr2L	1010606	1010607	IA-2	0.2	0.1	0.15
chr2L	1010609	1010610	IA-2	0.28	0.32	0.3
chr2L	1010640	1010641	IA-2	0.15	0.15	0.15
chr2L	1011188	1011189	IA-2	0.4	0.6	0.5
chr2L	1011344	1011345	IA-2	0.22	0.28	0.25
chr2L	1011346	1011347	IA-2	0.1	0.1	0.1
chr2L	1011352	1011353	IA-2	0.18	0.1	0.14
chr2L	1011379	1011380	IA-2	0.1	0.2	0.15
chr2L	1011390	1011391	IA-2	0.1	0.3	0.2
chr2L	1011399	1011400	IA-2	0.2	0.2	0.2
chr2L	1011402	1011403	IA-2	0.1	0.4	0.25
chr2L	1011403	1011404	IA-2	0.1	0.2	0.15
chr2L	1011411	1011412	IA-2	0.1	0.4	0.25
chr2L	1011427	1011428	IA-2	2.58	1.43	2
chr2L	1011479	1011480	IA-2	0.3	0.2	0.25
chr2L	1011482	1011483	IA-2	21	23.5	22.25
chr2L	1011484	1011485	IA-2	0.3	0.2	0.25
chr2L	1011486	1011487	IA-2	0.48	0.65	0.56
chr2L	1011490	1011491	IA-2	0.6	0.5	0.55
chr2L	1011495	1011496	IA-2	0.4	0.8	0.6
chr2L	1011502	1011503	IA-2	0.1	0.2	0.15
chr2L	1011505	1011506	IA-2	0.2	0.2	0.2
chr2L	1011511	1011512	IA-2	0.95	1.1	1.02
chr2L	1011515	1011516	IA-2	0.2	0.2	0.2
chr2L	1011517	1011518	IA-2	0.1	0.5	0.3
chr2L	1011542	1011543	IA-2	2.17	3.02	2.59
chr2L	1011544	1011545	IA-2	1.4	3.9	2.65
chr2L	1011546	1011547	IA-2	0.85	0.5	0.68
chr2L	1011548	1011549	IA-2	0.7	1.3	1
chr2L	1011550	1011551	IA-2	1.8	2.3	2.05
chr2L	1011580	1011581	IA-2	0.1	0.3	0.2
chr2L	1011588	1011589	IA-2	0.1	0.1	0.1
chr2L	1011604	1011605	IA-2	0.1	0.1	0.1
chr2L	1011623	1011624	IA-2	0.1	0.6	0.35
chr2L	1011631	1011632	IA-2	0.22	0.28	0.25
chr2L	1011636	1011637	IA-2	0	0.3	0.15
chr2L	1011637	1011638	IA-2	3.17	2.92	3.04
chr2L	1011656	1011657	IA-2	0.35	0.45	0.4
chr2L	1011668	1011669	IA-2	0.1	0.3	0.2
chr2L	1011669	1011670	IA-2	0.25	0.15	0.2
chr2L	1011675	1011676	IA-2	0.2	0.1	0.15
chr2L	1011688	1011689	IA-2	0.08	0.1	0.09
chr2L	1011695	1011696	IA-2	0.2	0	0.1
chr2L	1011705	1011706	IA-2	0.6	1	0.8
chr2L	1011709	1011710	IA-2	0.1	0.5	0.3
chr2L	1011711	1011712	IA-2	0.1	0.4	0.25
chr2L	1011727	1011728	IA-2	0.2	0.15	0.18
chr2L	1011728	1011729	IA-2	0.05	0.1	0.08
chr2L	1011729	1011730	IA-2	1.3	2.48	1.89
chr2L	1011731	1011732	IA-2	0.57	0.85	0.71
chr2L	1011738	1011739	IA-2	0.1	0.2	0.15
chr2L	1011743	1011744	IA-2	0.62	0.7	0.66
chr2L	1011745	1011746	IA-2	0.2	0.32	0.26
chr2L	1011753	1011754	IA-2	1.03	1.12	1.08
chr2L	1011757	1011758	IA-2	0.1	0.1	0.1
chr2L	1011758	1011759	IA-2	0.2	0.4	0.3
chr2L	1011767	1011768	IA-2	0.3	0.12	0.21
chr2L	1011774	1011775	IA-2	0.7	0.4	0.55
chr2L	1011779	1011780	IA-2	3.6	3.6	3.6
chr2L	1011780	1011781	IA-2	1.4	2	1.7
chr2L	1011782	1011783	IA-2	0.1	0.1	0.1
chr2L	1011783	1011784	IA-2	0	0.1	0.05
chr2L	1011784	1011785	IA-2	0.48	0.65	0.56
chr2L	1011796	1011797	IA-2	0.1	0.1	0.1
chr2L	1011806	1011807	IA-2	0.02	0.2	0.11
chr2L	1011807	1011808	IA-2	0.02	0	0.01
chr2L	1011812	1011813	IA-2	0.25	0	0.12
chr2L	1011813	1011814	IA-2	0.2	0.2	0.2
chr2L	1011827	1011828	IA-2	0.5	0.8	0.65
chr2L	1011828	1011829	IA-2	0.2	0.1	0.15
chr2L	1011830	1011831	IA-2	1.3	1.3	1.3
chr2L	1011840	1011841	IA-2	0.4	0.45	0.43
chr2L	1011845	1011846	IA-2	0.1	0.1	0.1
chr2L	1011848	1011849	IA-2	0.1	0.2	0.15
chr2L	1011852	1011853	IA-2	0.4	0.4	0.4
chr2L	1011853	1011854	IA-2	0.1	0.2	0.15
chr2L	1011873	1011874	IA-2	1.38	1.4	1.39
chr2L	1011876	1011877	IA-2	0.1	0.2	0.15
chr2L	1011896	1011897	IA-2	0.1	0.2	0.15
chr2L	1011900	1011901	IA-2	0.18	0.25	0.22
chr2L	1011903	1011904	IA-2	0	0.1	0.05
chr2L	1011909	1011910	IA-2	0	0.1	0.05
chr2L	1011917	1011918	IA-2	0.1	0.12	0.11
chr2L	1011971	1011972	IA-2	2.95	2.05	2.5
chr2L	1011996	1011997	IA-2	0.8	0.6	0.7
chr2L	1012018	1012019	IA-2	0.65	1.03	0.84
chr2L	1012024	1012025	IA-2	0.9	0.75	0.82
chr2L	1012048	1012049	IA-2	0.1	0.3	0.2
chr2L	1012109	1012110	IA-2	1.98	2.78	2.38
chr2L	1012116	1012117	IA-2	0.25	0.18	0.22
chr2L	1012128	1012129	IA-2	0	0.1	0.05
chr2L	1012130	1012131	IA-2	0	0.1	0.05
chr2L	1012134	1012135	IA-2	0.1	0.3	0.2
chr2L	1012146	1012147	IA-2	0.1	0.1	0.1
chr2L	1012153	1012154	IA-2	0.1	0.2	0.15
chr2L	1012155	1012156	IA-2	0.1	0.1	0.1
chr2L	1012158	1012159	IA-2	0.2	0.2	0.2
chr2L	1012167	1012168	IA-2	0.1	0.1	0.1
chr2L	1012179	1012180	IA-2	0.1	0.1	0.1
chr2L	1012184	1012185	IA-2	0.57	1.98	1.27
chr2L	1012192	1012193	IA-2	0.4	0.4	0.4
chr2L	1012195	1012196	IA-2	0.32	0.62	0.47
chr2L	1012198	1012199	IA-2	0.18	0.1	0.14
chr2L	1012203	1012204	IA-2	0.1	0.1	0.1
chr2L	1012207	1012208	IA-2	0.12	0.1	0.11
chr2L	1012213	1012214	IA-2	5	6.7	5.85
chr2L	1012218	1012219	IA-2	1.4	2.3	1.85
chr2L	1012222	1012223	IA-2	0.1	0.1	0.1
chr2L	1012226	1012227	IA-2	0.1	0.18	0.14
chr2L	1012227	1012228	IA-2	0.1	0.1	0.1
chr2L	1012228	1012229	IA-2	0.1	0.1	0.1
chr2L	1012232	1012233	IA-2	0.5	0.2	0.35
chr2L	1012234	1012235	IA-2	0.2	0.2	0.2
chr2L	1012237	1012238	IA-2	0.8	0.2	0.5
chr2L	1012238	1012239	IA-2	0.73	1	0.86
chr2L	1012242	1012243	IA-2	0.28	0.25	0.26
chr2L	1012243	1012244	IA-2	0.1	0.1	0.1
chr2L	1012248	1012249	IA-2	0.6	0.5	0.55
chr2L	1012251	1012252	IA-2	0.5	0.5	0.5
chr2L	1012255	1012256	IA-2	3.9	5.1	4.5
chr2L	1012261	1012262	IA-2	0.1	0.1	0.1
chr2L	1012268	1012269	IA-2	0.1	0.2	0.15
chr2L	1012270	1012271	IA-2	0.4	0.3	0.35
chr2L	1012273	1012274	IA-2	0.1	0.2	0.15
chr2L	1012276	1012277	IA-2	0.1	0.1	0.1
chr2L	1012287	1012288	IA-2	0.1	0.2	0.15
chr2L	1012290	1012291	IA-2	0.1	0.1	0.1
chr2L	1012297	1012298	IA-2	0.7	1.6	1.15
chr2L	1012298	1012299	IA-2	0.1	0.2	0.15
chr2L	1012308	1012309	IA-2	0.1	0.2	0.15
chr2L	1012580	1012581	IA-2	0.1	0.1	0.1
chr2L	1012600	1012601	IA-2	0.2	0.1	0.15
chr2L	1012609	1012610	IA-2	0.2	0.25	0.22
chr2L	10126126	10126127	CG44153	5.6	11.1	8.35
chr2L	1012624	1012625	IA-2	0.3	0.45	0.38
chr2L	1012634	1012635	IA-2	0.78	2.65	1.71
chr2L	1012671	1012672	IA-2	0.1	0.2	0.15
chr2L	1012689	1012690	IA-2	0.28	0.4	0.34
chr2L	1012696	1012697	IA-2	0.2	0.1	0.15
chr2L	1012698	1012699	IA-2	0.5	0.4	0.45
chr2L	1012715	1012716	IA-2	0.15	0.1	0.12
chr2L	1012844	1012845	IA-2	0.1	0.1	0.1
chr2L	1012849	1012850	IA-2	0.4	0.4	0.4
chr2L	1012853	1012854	IA-2	0.1	0.18	0.14
chr2L	1012854	1012855	IA-2	0	0	0
chr2L	1012858	1012859	IA-2	0	0.1	0.05
chr2L	1012871	1012872	IA-2	0.1	0.2	0.15
chr2L	1012877	1012878	IA-2	0.1	0.1	0.1
chr2L	1012879	1012880	IA-2	0.1	0.2	0.15
chr2L	1012886	1012887	IA-2	0.1	0.3	0.2
chr2L	1012895	1012896	IA-2	0	0.2	0.1
chr2L	1012927	1012928	IA-2	0.5	0.6	0.55
chr2L	1013108	1013109	IA-2	0.3	0.18	0.24
chr2L	1013118	1013119	IA-2	0.2	0.1	0.15
chr2L	1013124	1013125	IA-2	0.43	1.45	0.94
chr2L	1013457	1013458	IA-2	0.3	0.18	0.24
chr2L	1013469	1013470	IA-2	0.1	0.12	0.11
chr2L	1013503	1013504	IA-2	0.1	0.1	0.1
chr2L	1013513	1013514	IA-2	3.4	5.5	4.45
chr2L	1013522	1013523	IA-2	0.1	0.1	0.1
chr2L	1013575	1013576	IA-2	0.1	0.4	0.25
chr2L	1013582	1013583	IA-2	0.1	0.1	0.1
chr2L	1013584	1013585	IA-2	0.08	0.4	0.24
chr2L	1013588	1013589	IA-2	0.2	0.1	0.15
chr2L	1013590	1013591	IA-2	0.1	0.15	0.12
chr2L	1014711	1014712	IA-2	0.65	1.1	0.88
chr2L	1015251	1015252	IA-2	0	0.1	0.05
chr2L	1015337	1015338	IA-2	0	0.1	0.05
chr2L	1015430	1015431	IA-2	0.55	0.43	0.49
chr2L	1016209	1016210	IA-2	0.08	0.1	0.09
chr2L	1016214	1016215	IA-2	0.02	0.12	0.07
chr2L	1016912	1016913	IA-2	0.2	0.2	0.2
chr2L	101889	101890	Zir	2.9	2.9	2.9
chr2L	10200152	10200153	Ripalpha	2.6	5	3.8
chr2L	10201121	10201122	RpL7	1.7	1.4	1.55
chr2L	10201434	10201435	RpL7	0.1	0.38	0.24
chr2L	10203426	10203427	CG34159	2.6	1.9	2.25
chr2L	10205163	10205164	CG5734	1.1	1.4	1.25
chr2L	10205167	10205168	CG5734	1.1	1.4	1.25
chr2L	10206065	10206066	CG5734	1.7	2.6	2.15
chr2L	10206305	10206306	CG5734	1.6	2.7	2.15
chr2L	10206512	10206513	CG5734	2	2	2
chr2L	10206518	10206519	CG5734	1.5	2.1	1.8
chr2L	10214829	10214830	Npc1a	1.05	1.98	1.52
chr2L	10216427	10216428	Npc1a	1.3	1	1.15
chr2L	10221937	10221938	Prosalpha6	1.4	2.4	1.9
chr2L	10229869	10229870	CG5694	2.9	4.5	3.7
chr2L	10232618	10232619	eEF1delta	1	1.6	1.3
chr2L	10240782	10240783	me31B	0.5	1	0.75
chr2L	10244278	10244279	chico	3.1	11.1	7.1
chr2L	10244980	10244981	CR44995	2.1	9.5	5.8
chr2L	10245555	10245556	CR44995	5.7	3.1	4.4
chr2L	10247643	10247644	bsk	0.4	0.5	0.45
chr2L	10248218	10248219	bsk	2.9	4.35	3.62
chr2L	10248849	10248850	bsk	0.7	1.38	1.04
chr2L	10249105	10249106	bsk	6.9	7	6.95
chr2L	10249196	10249197	bsk	0.5	0.7	0.6
chr2L	10249230	10249231	bsk	0.7	0.7	0.7
chr2L	10249233	10249234	bsk	0.8	0.8	0.8
chr2L	10250283	10250284	bsk	1.3	1.4	1.35
chr2L	10250352	10250353	bsk	9.1	7.7	8.4
chr2L	10250418	10250419	bsk	3.7	0.8	2.25
chr2L	10250427	10250428	bsk	0.8	4.3	2.55
chr2L	10252649	10252650	Ror	3.6	11.1	7.35
chr2L	10252935	10252936	Ror	3.1	7.1	5.1
chr2L	10253779	10253780	Ror	7.7	5.6	6.65
chr2L	10254006	10254007	Ror	7.1	6.7	6.9
chr2L	10254806	10254807	CG5676	1.3	2.2	1.75
chr2L	10255755	10255756	CG5676	0.4	0.5	0.45
chr2L	10258348	10258349	Pten	1.4	2.5	1.95
chr2L	10259507	10259508	Pten	2.2	2.8	2.5
chr2L	10262482	10262483	Rsf1	0.6	0.9	0.75
chr2L	10262619	10262620	Rsf1	1	2.9	1.95
chr2L	10262992	10262993	Rsf1	0.7	0.9	0.8
chr2L	10272535	10272536	Utx	11.5	10	10.75
chr2L	10275560	10275561	Utx	4.8	4.8	4.8
chr2L	10275863	10275864	Utx	6.7	5.3	6
chr2L	10275888	10275889	Utx	4.5	9.1	6.8
chr2L	102827	102828	CG11377	1.8	5.6	3.7
chr2L	10283067	10283068	CG5604	0.6	2	1.3
chr2L	10283206	10283207	CG5604	0.8	0.9	0.85
chr2L	10283310	10283311	CG5604	0.78	0.88	0.83
chr2L	10284329	10284330	CG5604	0.7	0.7	0.7
chr2L	10284501	10284502	CG5604	0.8	1	0.9
chr2L	10284572	10284573	CG5604	1.7	1.6	1.65
chr2L	10284752	10284753	CG5604	2.4	1.4	1.9
chr2L	10285384	10285385	CG5604	0.7	0.9	0.8
chr2L	10285419	10285420	CG5604	0.8	0.9	0.85
chr2L	10285506	10285507	CG5604	1	1.4	1.2
chr2L	10287401	10287402	CG5604	3.6	8.45	6.02
chr2L	10288649	10288650	CG5604	2.2	1.5	1.85
chr2L	10289517	10289518	CG5604	1.7	2.1	1.9
chr2L	10296538	10296539	CYLD	1.1	1.8	1.45
chr2L	10302909	10302910	nmd	2.1	2.9	2.5
chr2L	10303033	10303034	nmd	1.7	2	1.85
chr2L	10303812	10303813	nmd	0.6	0.9	0.75
chr2L	10304378	10304379	CG5390	0.7	1.7	1.2
chr2L	10305410	10305411	CG5390	1.2	2.9	2.05
chr2L	10309483	10309484	Cdk5alpha	0.5	0.4	0.45
chr2L	10309865	10309866	Cdk5alpha	0.5	0.6	0.55
chr2L	10309951	10309952	Cdk5alpha	0.5	0.5	0.5
chr2L	10310134	10310135	Cdk5alpha	0.5	0.6	0.55
chr2L	10310579	10310580	Cdk5alpha	1.07	1.32	1.2
chr2L	10310636	10310637	Cdk5alpha	0.3	0.3	0.3
chr2L	10310723	10310724	Cdk5alpha	0.4	0.7	0.55
chr2L	10317040	10317041	CG4972	1.2	1.6	1.4
chr2L	10317295	10317296	CG4972	3.5	10.3	6.9
chr2L	10329408	10329409	CG5375	0.7	1.4	1.05
chr2L	10329475	10329476	CG5375	4.2	2.6	3.4
chr2L	10329548	10329549	CG5375	0.6	1	0.8
chr2L	10330182	10330183	CG5375	1.2	1.7	1.45
chr2L	10330405	10330406	CG5375	0.8	1.5	1.15
chr2L	10330553	10330554	CG5375	0.7	1.5	1.1
chr2L	10331641	10331642	CG5037	1	1.4	1.2
chr2L	10331675	10331676	CG5037	0.9	1.6	1.25
chr2L	10332199	10332200	CG5037	7.4	8.5	7.95
chr2L	10332920	10332921	CG5037	0.7	4.2	2.45
chr2L	10334122	10334123	GATAd	3.8	3.6	3.7
chr2L	10334522	10334523	GATAd	2.9	3.7	3.3
chr2L	10337382	10337383	GATAd	4.1	7.3	5.7
chr2L	10337405	10337406	GATAd	1.7	2.7	2.2
chr2L	10337457	10337458	GATAd	1.6	2.6	2.1
chr2L	1033928	1033929	IA-2	0.1	0.1	0.1
chr2L	10341294	10341295	SamDC	1.8	2.8	2.3
chr2L	10347221	10347222	CG5022	6.7	5.9	6.3
chr2L	10347586	10347587	CG5022	8	13.3	10.65
chr2L	10357110	10357111	CG5045	1.6	2.2	1.9
chr2L	10357408	10357409	CG5045	1.8	2	1.9
chr2L	10362383	10362384	Cand1	2.9	4.3	3.6
chr2L	10368109	10368110	rho-5	1.6	2.3	1.95
chr2L	10368297	10368298	rho-5	1.2	1.4	1.3
chr2L	10368664	10368665	rho-5	1.8	2.2	2
chr2L	10369122	10369123	rho-5	1.3	2	1.65
chr2L	10369631	10369632	rho-5	1.6	2.6	2.1
chr2L	10370869	10370870	rho-5	2.2	2.6	2.4
chr2L	10371106	10371107	rho-5	1.5	2.5	2
chr2L	10371607	10371608	rho-5	1.9	2.4	2.15
chr2L	10372462	10372463	rho-5	1.9	2.4	2.15
chr2L	10374246	10374247	CG33303	2.4	7.7	5.05
chr2L	10374569	10374570	CG33303	17.3	16.7	17
chr2L	10376816	10376817	dpr19	1.4	2.3	1.85
chr2L	10378526	10378527	dpr19	0.9	1.1	1
chr2L	10378842	10378843	dpr19	1	1	1
chr2L	10379549	10379550	dpr19	1.2	1.1	1.15
chr2L	10379845	10379846	dpr19	11.6	14.3	12.95
chr2L	103844	103845	CG11377	2.5	4.2	3.35
chr2L	10387160	10387161	mRpS7	1.2	2.3	1.75
chr2L	10387457	10387458	mRpS7	1.9	3.4	2.65
chr2L	10390085	10390086	da	1.4	3.2	2.3
chr2L	10390593	10390594	da	2	4.4	3.2
chr2L	10392052	10392053	da	1.8	2.6	2.2
chr2L	10392530	10392531	da	2.4	1.7	2.05
chr2L	10393219	10393220	da	4.3	3.7	4
chr2L	10393864	10393865	Mdh1	6.3	1.4	3.85
chr2L	10398372	10398373	Cnot4	0.7	1.1	0.9
chr2L	10399458	10399459	Cnot4	2	3.25	2.62
chr2L	10399925	10399926	Cnot4	0.8	0.9	0.85
chr2L	10399939	10399940	Cnot4	0.7	0.8	0.75
chr2L	10400003	10400004	Cnot4	0.9	1	0.95
chr2L	10400801	10400802	Cnot4	1.4	0.8	1.1
chr2L	10401093	10401094	Cnot4	0.8	1.4	1.1
chr2L	10401341	10401342	Cnot4	1	1.6	1.3
chr2L	10401850	10401851	Cnot4	0.6	1.2	0.9
chr2L	10402529	10402530	Cnot4	0.9	1.1	1
chr2L	10402901	10402902	Cnot4	7.1	2.1	4.6
chr2L	10402910	10402911	Cnot4	7.1	10.9	9
chr2L	10402930	10402931	Cnot4	5	2.6	3.8
chr2L	10402931	10402932	Cnot4	5.1	2.7	3.9
chr2L	10403435	10403436	CG17768	1.1	1.5	1.3
chr2L	10403435	10403436	LSm-4	1.1	1.5	1.3
chr2L	10403820	10403821	CG17768	0.6	2.3	1.45
chr2L	10403820	10403821	LSm-4	0.6	2.3	1.45
chr2L	10408800	10408801	Ip259	0.4	0.2	0.3
chr2L	10408800	10408801	RpS27A	0.4	0.2	0.3
chr2L	10408919	10408920	Ip259	0.65	1	0.82
chr2L	10408919	10408920	RpS27A	0.65	1	0.82
chr2L	10408920	10408921	Ip259	2.27	2.35	2.31
chr2L	10408920	10408921	RpS27A	2.27	2.35	2.31
chr2L	10408949	10408950	Ip259	0.3	0.3	0.3
chr2L	10408949	10408950	RpS27A	0.3	0.3	0.3
chr2L	10409430	10409431	Ip259	0.22	0.5	0.36
chr2L	10409430	10409431	RpS27A	0.22	0.5	0.36
chr2L	10412943	10412944	CG5355	5.4	5	5.2
chr2L	104179	104180	Nhe1	5.7	5.3	5.5
chr2L	104180	104181	Nhe1	3.73	11	7.37
chr2L	10425898	10425899	SmB	1.7	5.3	3.5
chr2L	10427279	10427280	KdelR	0.9	1.5	1.2
chr2L	10427771	10427772	KdelR	1.7	1.5	1.6
chr2L	10428209	10428210	KdelR	1.4	4.5	2.95
chr2L	10428312	10428313	KdelR	1.1	4.5	2.8
chr2L	1043154	1043155	IA-2	0.38	0.2	0.29
chr2L	1043192	1043193	IA-2	0.3	0.2	0.25
chr2L	1043196	1043197	IA-2	2.1	0.9	1.5
chr2L	10432344	10432345	TfIIB	1.5	2.3	1.9
chr2L	10432752	10432753	CG5337	1	1.8	1.4
chr2L	10432877	10432878	CG5337	0.9	1.5	1.2
chr2L	10433032	10433033	TfIIB	0.7	2.4	1.55
chr2L	10433155	10433156	CG5337	0.8	2.8	1.8
chr2L	10433958	10433959	CG5337	0.6	1.1	0.85
chr2L	10434241	10434242	CG5337	0.9	1.4	1.15
chr2L	10434906	10434907	CG5337	1.3	3.1	2.2
chr2L	10435227	10435228	CG5337	2	1.9	1.95
chr2L	10435254	10435255	CG5337	1.77	6.42	4.09
chr2L	10436411	10436412	holn1	8.3	7.7	8
chr2L	10437675	10437676	CHIP	0.7	1.3	1
chr2L	10437728	10437729	CHIP	1.1	1.8	1.45
chr2L	10437915	10437916	CHIP	1.2	1.6	1.4
chr2L	10438676	10438677	CHIP	0.8	1.5	1.15
chr2L	10438692	10438693	CHIP	0.9	1.5	1.2
chr2L	10439181	10439182	CHIP	2.2	2.7	2.45
chr2L	10439879	10439880	CG13142	5.3	7.7	6.5
chr2L	104556	104557	Nhe1	2.3	2.9	2.6
chr2L	10457807	10457808	LM408	0.8	2.1	1.45
chr2L	10458774	10458775	LM408	1	1	1
chr2L	10460154	10460155	LM408	1.4	1.9	1.65
chr2L	10461085	10461086	LM408	0.5	0.8	0.65
chr2L	10461369	10461370	LM408	0.4	0.8	0.6
chr2L	10461691	10461692	LM408	0.4	0.7	0.55
chr2L	1046841	1046842	IA-2	0.1	0.2	0.15
chr2L	1046847	1046848	IA-2	0.1	0.25	0.18
chr2L	1046904	1046905	IA-2	0.2	0.32	0.26
chr2L	1046935	1046936	IA-2	0.2	0.2	0.2
chr2L	1046993	1046994	IA-2	0.5	0.3	0.4
chr2L	104747	104748	Nhe1	2	2.1	2.05
chr2L	10483577	10483578	Grip75	3.6	5.9	4.75
chr2L	10483609	10483610	Grip75	4	4	4
chr2L	10488948	10488949	CG6144	7.2	25	16.1
chr2L	10488967	10488968	CG6144	1.2	4.8	3
chr2L	10489103	10489104	CG6144	2.4	3.8	3.1
chr2L	10489475	10489476	CG6144	1.4	7	4.2
chr2L	10489747	10489748	CG6144	5.1	3.8	4.45
chr2L	10490009	10490010	CG6144	3.4	6.5	4.95
chr2L	10490016	10490017	CG6144	3	3.6	3.3
chr2L	10490158	10490159	CG6144	7.4	18.2	12.8
chr2L	10490286	10490287	CG6144	4.5	6.9	5.7
chr2L	10490373	10490374	CG13144	2.1	4.8	3.45
chr2L	1050470	1050471	S	2	1.9	1.95
chr2L	1050688	1050689	S	4	3.6	3.8
chr2L	1050942	1050943	S	2.9	7.1	5
chr2L	10511856	10511857	CG45083	6	9.2	7.6
chr2L	10511856	10511857	Fatp	6	9.2	7.6
chr2L	10512322	10512323	CG45083	7.1	7.7	7.4
chr2L	10512322	10512323	Fatp	7.1	7.7	7.4
chr2L	1061657	1061658	S	5.6	4.2	4.9
chr2L	10620626	10620627	Trim9	3.1	5	4.05
chr2L	10627022	10627023	Trim9	3	16.7	9.85
chr2L	10627191	10627192	Trim9	10	4.3	7.15
chr2L	10693017	10693018	CG17108	0.25	0.7	0.48
chr2L	10693123	10693124	CG17108	0.1	0.6	0.35
chr2L	10693173	10693174	CG17108	0.7	0.9	0.8
chr2L	10729256	10729257	CG6443	3.1	4.2	3.65
chr2L	10729639	10729640	CG6443	1.9	3.6	2.75
chr2L	10731607	10731608	CG6750	2	6.7	4.35
chr2L	10744133	10744134	CG17124	2.9	3.3	3.1
chr2L	10744758	10744759	CG17124	0.9	2.2	1.55
chr2L	10745244	10745245	CG17124	2.3	1.2	1.75
chr2L	10745466	10745467	CG17124	0.7	1.2	0.95
chr2L	10761187	10761188	CG6495	0.6	0.8	0.7
chr2L	10761210	10761211	CG6495	0.5	3.2	1.85
chr2L	10764128	10764129	CG6495	1	1.4	1.2
chr2L	10764333	10764334	CG6495	1.8	1.5	1.65
chr2L	10765726	10765727	UbcD2	2.6	4	3.3
chr2L	10774240	10774241	CG31869	20	9.1	14.55
chr2L	10806029	10806030	Nos	4.8	6.3	5.55
chr2L	10806721	10806722	Nos	5.6	2	3.8
chr2L	108332	108333	Sam-S	1.6	3.1	2.35
chr2L	1083636	1083637	Atg4a	0.9	1.2	1.05
chr2L	10837920	10837921	CG6700	4.1	3.4	3.75
chr2L	10838054	10838055	CG6700	0.7	0.7	0.7
chr2L	1083964	1083965	Atg4a	0.9	0.9	0.9
chr2L	10839925	10839926	CG6700	0.7	0.7	0.7
chr2L	10840000	10840001	CG6700	1.5	0.7	1.1
chr2L	10840180	10840181	CG6700	1.3	1.7	1.5
chr2L	1084059	1084060	CG4629	1.1	1.2	1.15
chr2L	1084070	1084071	CG4629	1.1	1.2	1.15
chr2L	10840918	10840919	CG6700	0.9	0.4	0.65
chr2L	10840975	10840976	CG6700	0.9	0.6	0.75
chr2L	10841416	10841417	CG6700	0.8	0.6	0.7
chr2L	1084152	1084153	CG4629	1.1	1.5	1.3
chr2L	10841578	10841579	CG6700	1.1	0.9	1
chr2L	1084365	1084366	CG4629	1	1.5	1.25
chr2L	1084646	1084647	Atg4a	0.9	2.5	1.7
chr2L	1084676	1084677	CG4629	2.9	1.3	2.1
chr2L	1084677	1084678	CG4629	1	1.3	1.15
chr2L	10847319	10847320	porin	0.2	0.3	0.25
chr2L	10847361	10847362	porin	0.4	0.48	0.44
chr2L	10847401	10847402	porin	0.9	0.4	0.65
chr2L	10847402	10847403	porin	0.38	0.75	0.56
chr2L	10847428	10847429	porin	0.3	0.5	0.4
chr2L	1084937	1084938	CG4629	1	1.3	1.15
chr2L	1084972	1084973	Atg4a	1.3	1.4	1.35
chr2L	10855010	10855011	Dnz1	2.3	13.3	7.8
chr2L	10855181	10855182	Dnz1	2.9	5.3	4.1
chr2L	10861013	10861014	Stam	2.8	8	5.4
chr2L	10917265	10917266	dpr2	5.3	4.3	4.8
chr2L	10918203	10918204	dpr2	3.7	4.3	4
chr2L	10965086	10965087	CG33129	1.2	1.3	1.25
chr2L	10965175	10965176	CG33129	1.9	2.1	2
chr2L	10965201	10965202	CG33129	0.8	1.2	1
chr2L	10965241	10965242	CG33129	0.5	0.8	0.65
chr2L	10966536	10966537	CG33129	0.5	1.27	0.88
chr2L	10969099	10969100	CG33129	5.9	6.3	6.1
chr2L	10976077	10976078	l(2)06225	0.35	1.6	0.98
chr2L	10978198	10978199	SCAR	1.3	2.1	1.7
chr2L	10978340	10978341	SCAR	1.2	2	1.6
chr2L	10979671	10979672	SCAR	2	2.2	2.1
chr2L	10981772	10981773	SCAR	1.1	1.5	1.3
chr2L	10981956	10981957	SCAR	2.1	3.6	2.85
chr2L	10990507	10990508	CG16833	5.9	3.7	4.8
chr2L	10991123	10991124	CG16833	1.7	3	2.35
chr2L	10991998	10991999	CG16833	1.2	1.7	1.45
chr2L	10992631	10992632	CG16833	1.6	2	1.8
chr2L	10992828	10992829	CG16833	1.4	2.55	1.97
chr2L	10993622	10993623	CG16833	1.5	2.7	2.1
chr2L	10993623	10993624	CG16833	3.08	16.4	9.74
chr2L	10993813	10993814	CG16833	1.3	1.3	1.3
chr2L	10993934	10993935	CG16833	1.6	1.4	1.5
chr2L	11002880	11002881	RpL9	0.2	0.3	0.25
chr2L	11003752	11003753	RpL9	0.15	0.2	0.18
chr2L	11004049	11004050	RpL9	0.1	0.1	0.1
chr2L	11006555	11006556	Nup154	5.3	11.1	8.2
chr2L	11008977	11008978	Nup154	7.7	10	8.85
chr2L	1105952	1105953	mtRNApol	3.8	9.1	6.45
chr2L	11076236	11076237	AstC	0.4	0.7	0.55
chr2L	11076260	11076261	AstC	0.4	0.6	0.5
chr2L	11076272	11076273	AstC	1	1.6	1.3
chr2L	11076292	11076293	AstC	0.7	0.5	0.6
chr2L	11076296	11076297	AstC	0.6	0.4	0.5
chr2L	11076381	11076382	AstC	8.3	6.8	7.55
chr2L	11076382	11076383	AstC	9.7	1	5.35
chr2L	11076392	11076393	AstC	1.6	1	1.3
chr2L	11076492	11076493	AstC	5.4	2.6	4
chr2L	11076559	11076560	AstC	0.4	1	0.7
chr2L	11076673	11076674	AstC	0.75	1.32	1.04
chr2L	11076713	11076714	AstC	0.3	0.5	0.4
chr2L	11077221	11077222	AstC	0.3	0.4	0.35
chr2L	11090619	11090620	CG16854	3.7	6.3	5
chr2L	11097170	11097171	Ge-1	2.6	3.6	3.1
chr2L	11099713	11099714	Ge-1	4.5	5.9	5.2
chr2L	11102127	11102128	Reps	3.2	15	9.1
chr2L	11109246	11109247	l(2)gd1	4.2	3.8	4
chr2L	11110705	11110706	CG6201	2.9	4.2	3.55
chr2L	11111559	11111560	CG6201	3.6	4.3	3.95
chr2L	11112137	11112138	CG6201	3.8	5.3	4.55
chr2L	11116065	11116066	CG6230	3.1	9.1	6.1
chr2L	11128815	11128816	Nup160	6.7	18.2	12.45
chr2L	11129443	11129444	RfC38	6.3	16.7	11.5
chr2L	11134803	11134804	CG4751	6.7	11.1	8.9
chr2L	1115037	1115038	Pino	0.8	1.4	1.1
chr2L	11153525	11153526	CG6287	0.5	0.7	0.6
chr2L	11156509	11156510	Ca-beta	1.1	2.2	1.65
chr2L	11157035	11157036	Ca-beta	2.9	1.3	2.1
chr2L	11157132	11157133	Ca-beta	1.4	1.5	1.45
chr2L	11157341	11157342	Ca-beta	2.4	4.9	3.65
chr2L	11157541	11157542	Ca-beta	1.3	2.6	1.95
chr2L	11159021	11159022	Ca-beta	1.9	2.8	2.35
chr2L	11159140	11159141	Ca-beta	1.8	2.2	2
chr2L	11159508	11159509	Ca-beta	1.6	1.5	1.55
chr2L	11160012	11160013	Ca-beta	1.8	1.3	1.55
chr2L	11160023	11160024	Ca-beta	2.3	1.3	1.8
chr2L	11162437	11162438	Ca-beta	4.4	2.7	3.55
chr2L	11163732	11163733	Ca-beta	1.2	1.1	1.15
chr2L	11164133	11164134	Ca-beta	5.9	9.1	7.5
chr2L	11179800	11179801	CG4788	16.78	35.42	26.1
chr2L	11257134	11257135	ab	2.6	2.5	2.55
chr2L	112793	112794	Sam-S	0.3	0.5	0.4
chr2L	11283083	11283084	mre11	9.1	6.3	7.7
chr2L	113249	113250	Sam-S	2.5	8.1	5.3
chr2L	1133396	1133397	Iris	1.4	3.1	2.25
chr2L	1134795	1134796	CG4577	0.6	0.2	0.4
chr2L	1135155	1135156	CG4577	4.8	3.3	4.05
chr2L	113646	113647	Sam-S	0.6	0.5	0.55
chr2L	11367320	11367321	salr	6.7	7.1	6.9
chr2L	113694	113695	Sam-S	2.5	4.25	3.38
chr2L	113727	113728	Sam-S	0.3	1	0.65
chr2L	1137518	1137519	CG4577	1.4	2.2	1.8
chr2L	113873	113874	Sam-S	0.3	0.5	0.4
chr2L	113977	113978	Sam-S	0.4	0.6	0.5
chr2L	1139948	1139949	CG4577	0.65	2	1.32
chr2L	1139989	1139990	CG4577	0.38	1.4	0.89
chr2L	1140275	1140276	CG4577	0.5	0.5	0.5
chr2L	1140277	1140278	CG4577	0.3	0.5	0.4
chr2L	1140359	1140360	CG4577	0.2	0.6	0.4
chr2L	1140369	1140370	CG4577	0.8	1.57	1.19
chr2L	1140452	1140453	CG4577	0.2	0.2	0.2
chr2L	1140503	1140504	CG4577	1.2	1.4	1.3
chr2L	1140666	1140667	CG4577	1.4	5.47	3.43
chr2L	1140685	1140686	CG4577	0.4	1.3	0.85
chr2L	1140698	1140699	CG4577	20.4	29.7	25.05
chr2L	1140700	1140701	CG4577	1	1.98	1.49
chr2L	1140702	1140703	CG4577	1.5	5	3.25
chr2L	1140706	1140707	CG4577	0.6	1.65	1.12
chr2L	1140708	1140709	CG4577	0.3	0.5	0.4
chr2L	1140712	1140713	CG4577	0.3	0.5	0.4
chr2L	1140720	1140721	CG4577	0.2	0.7	0.45
chr2L	1140726	1140727	CG4577	0.6	0.3	0.45
chr2L	1140728	1140729	CG4577	9.4	15	12.2
chr2L	1140729	1140730	CG4577	1.9	1.3	1.6
chr2L	1140737	1140738	CG4577	0.2	0.3	0.25
chr2L	1140739	1140740	CG4577	0.2	0.3	0.25
chr2L	1140752	1140753	CG4577	0.2	0.9	0.55
chr2L	1140778	1140779	CG4577	1.2	1.6	1.4
chr2L	1140796	1140797	CG4577	0.5	0.7	0.6
chr2L	1140805	1140806	CG4577	0.2	0.3	0.25
chr2L	1140823	1140824	CG4577	0.2	1	0.6
chr2L	1140833	1140834	CG4577	0.2	0.3	0.25
chr2L	1140843	1140844	CG4577	0.4	0.3	0.35
chr2L	1140866	1140867	CG4577	0.6	0.4	0.5
chr2L	1140876	1140877	CG4577	0.6	0.5	0.55
chr2L	1140906	1140907	CG4577	0.4	0.7	0.55
chr2L	114252	114253	Sam-S	0.6	1.4	1
chr2L	1149657	1149658	Tfb4	9.1	16.7	12.9
chr2L	1149898	1149899	Tfb4	11.1	50	30.55
chr2L	11508745	11508746	CG6509	4.3	12.5	8.4
chr2L	11514290	11514291	CG6509	5.3	8.3	6.8
chr2L	11523312	11523313	CG31705	1.6	2.3	1.95
chr2L	11523337	11523338	CG31705	1.1	1.1	1.1
chr2L	11525229	11525230	CG31705	0.2	0.5	0.35
chr2L	11528147	11528148	CG31705	0.3	0.2	0.25
chr2L	11529542	11529543	CG31706	1	1.1	1.05
chr2L	1153546	1153547	capt	1	1.4	1.2
chr2L	1154713	1154714	capt	1.7	2.4	2.05
chr2L	11582171	11582172	kek2	3.6	4.2	3.9
chr2L	11582415	11582416	kek2	3.1	5.6	4.35
chr2L	1158988	1158989	CR43767	2.3	4.5	3.4
chr2L	1160098	1160099	Tango14	3.7	6.3	5
chr2L	1162123	1162124	CG5080	1.2	2.6	1.9
chr2L	11621746	11621747	kek2	2.2	3.3	2.75
chr2L	11622051	11622052	kek2	5.3	3.6	4.45
chr2L	11622368	11622369	kek2	6.5	5.6	6.05
chr2L	11622721	11622722	kek2	3.7	3	3.35
chr2L	11622740	11622741	kek2	3.6	3	3.3
chr2L	11623936	11623937	kek2	2.4	2.5	2.45
chr2L	1171274	1171275	CG5118	5.9	10.5	8.2
chr2L	1171607	1171608	CG5118	4.8	4.2	4.5
chr2L	1172163	1172164	CG5118	6.7	12.5	9.6
chr2L	1174320	1174321	CG4887	2.8	2	2.4
chr2L	1174503	1174504	CG4887	1.3	1.3	1.3
chr2L	1175433	1175434	CG4887	1.6	1.5	1.55
chr2L	1175475	1175476	CG4887	1.1	1.2	1.15
chr2L	1176646	1176647	CG4887	1.3	1	1.15
chr2L	1176961	1176962	CG4887	1.18	1.1	1.14
chr2L	1177074	1177075	CG4887	1.4	1.2	1.3
chr2L	11794497	11794498	crol	1.8	2.5	2.15
chr2L	11794622	11794623	crol	0.7	0.9	0.8
chr2L	11794836	11794837	crol	0.8	1.3	1.05
chr2L	11794879	11794880	crol	0.9	1.1	1
chr2L	11794889	11794890	crol	2.5	1.3	1.9
chr2L	11794903	11794904	crol	0.7	1	0.85
chr2L	11794947	11794948	crol	0.7	0.9	0.8
chr2L	11795098	11795099	crol	0.9	1.1	1
chr2L	11795225	11795226	crol	0.8	1.2	1
chr2L	11795250	11795251	crol	0.8	1.2	1
chr2L	11795251	11795252	crol	0.8	1.2	1
chr2L	11795274	11795275	crol	2.5	2.7	2.6
chr2L	11795513	11795514	crol	0.8	1	0.9
chr2L	11795554	11795555	crol	0.8	1	0.9
chr2L	11795663	11795664	crol	0.8	0.8	0.8
chr2L	11795891	11795892	crol	0.9	1	0.95
chr2L	11795907	11795908	crol	0.7	1.3	1
chr2L	11795986	11795987	crol	1	1.3	1.15
chr2L	11796399	11796400	crol	1.3	1.7	1.5
chr2L	11796618	11796619	crol	1.6	1.3	1.45
chr2L	11796669	11796670	crol	1.3	2.2	1.75
chr2L	11796923	11796924	crol	4.2	1.3	2.75
chr2L	11796973	11796974	crol	1	2.9	1.95
chr2L	11796982	11796983	crol	1.1	1.5	1.3
chr2L	11798720	11798721	crol	0.8	1.3	1.05
chr2L	11798726	11798727	crol	0.8	1.3	1.05
chr2L	11799339	11799340	crol	1	1.2	1.1
chr2L	11800157	11800158	crol	1.2	1.2	1.2
chr2L	11802577	11802578	crol	1	1.6	1.3
chr2L	11802838	11802839	crol	2.4	1.8	2.1
chr2L	11803792	11803793	crol	1	2	1.5
chr2L	11806122	11806123	crol	0.9	1.7	1.3
chr2L	11809133	11809134	crol	1.3	2.1	1.7
chr2L	11809241	11809242	crol	1	1.7	1.35
chr2L	11811046	11811047	CycY	3.9	6.9	5.4
chr2L	11811298	11811299	CycY	1.4	2.3	1.85
chr2L	11812031	11812032	CycY	3.7	8	5.85
chr2L	11814234	11814235	Pde1c	1.6	3.7	2.65
chr2L	11814350	11814351	Pde1c	1	0.7	0.85
chr2L	11814434	11814435	Pde1c	0.6	1.8	1.2
chr2L	11814549	11814550	Pde1c	2.8	2.4	2.6
chr2L	11814709	11814710	Pde1c	0.9	0.8	0.85
chr2L	11814811	11814812	Pde1c	2.4	1.5	1.95
chr2L	11814862	11814863	Pde1c	1.1	1.4	1.25
chr2L	11815061	11815062	Pde1c	1.6	3	2.3
chr2L	11815066	11815067	Pde1c	0.9	1.1	1
chr2L	11815224	11815225	Pde1c	1.75	1.52	1.64
chr2L	11815425	11815426	Pde1c	1.2	0.85	1.02
chr2L	11815925	11815926	Pde1c	1.3	3.1	2.2
chr2L	11816383	11816384	Pde1c	0.8	1	0.9
chr2L	11816600	11816601	Pde1c	1.3	1.5	1.4
chr2L	11817506	11817507	Pde1c	1	1.25	1.12
chr2L	11817901	11817902	Pde1c	1.4	1.2	1.3
chr2L	1182333	1182334	CG5126	1.4	2	1.7
chr2L	1182350	1182351	CG4896	1.3	1.8	1.55
chr2L	11830828	11830829	Pde1c	1.4	1.6	1.5
chr2L	11835593	11835594	Pde1c	1	1.2	1.1
chr2L	11838585	11838586	Pde1c	1.9	1.5	1.7
chr2L	11843104	11843105	CG14933	0.5	1.1	0.8
chr2L	11843358	11843359	Pde1c	0.3	0.7	0.5
chr2L	11843441	11843442	Pde1c	0.3	0.6	0.45
chr2L	11851669	11851670	Pde1c	3	3.7	3.35
chr2L	11851683	11851684	Mal-B2	3.2	3.7	3.45
chr2L	118704	118705	CG11455	4.3	11.1	7.7
chr2L	1191888	1191889	CG5001	9.1	12.5	10.8
chr2L	11984603	11984604	CG6686	3.5	2.45	2.98
chr2L	11985757	11985758	CG6686	3.3	4.8	4.05
chr2L	11986165	11986166	CG6686	1.3	1.5	1.4
chr2L	11987093	11987094	CG6686	4.3	3.75	4.03
chr2L	11987321	11987322	CG6686	2.4	3.3	2.85
chr2L	11987954	11987955	CG6686	2.6	20	11.3
chr2L	11991242	11991243	escl	6.7	11.1	8.9
chr2L	119937	119938	CG4822	5.9	33.3	19.6
chr2L	12000294	12000295	CG12264	2.2	3.7	2.95
chr2L	12001004	12001005	CG12264	1.8	3.8	2.8
chr2L	12001082	12001083	CG12264	3.6	4	3.8
chr2L	12037970	12037971	Tom70	2.1	4	3.05
chr2L	12045441	12045442	CG6770	0.3	0.35	0.32
chr2L	12045490	12045491	CG6770	0.1	0.1	0.1
chr2L	12045527	12045528	CG6770	1.8	1.9	1.85
chr2L	12049689	12049690	CG14945	1.3	1.7	1.5
chr2L	12049974	12049975	CG14945	1.3	0.9	1.1
chr2L	12050322	12050323	CG14945	0.8	1.1	0.95
chr2L	12050483	12050484	CG14945	1.5	1.1	1.3
chr2L	12052562	12052563	JhI-21	7.7	5	6.35
chr2L	12056681	12056682	CG34164	1.7	5.2	3.45
chr2L	12056681	12056682	RpL7-like	1.7	5.2	3.45
chr2L	12056806	12056807	CG34164	2	2	2
chr2L	12056806	12056807	RpL7-like	2	2	2
chr2L	12063956	12063957	CG14946	5	5.9	5.45
chr2L	12094002	12094003	Pex19	0.4	1	0.7
chr2L	12094416	12094417	Pex19	0.5	0.9	0.7
chr2L	12094599	12094600	Pex19	2.2	1.9	2.05
chr2L	12094634	12094635	Pex19	0.5	1	0.75
chr2L	12094893	12094894	Pex19	0.7	1.4	1.05
chr2L	12094899	12094900	Pex19	3.5	5.5	4.5
chr2L	12095431	12095432	CG6712	6.3	9.1	7.7
chr2L	12096119	12096120	CG6712	5.9	6.7	6.3
chr2L	12099598	12099599	Ced-12	3	5.9	4.45
chr2L	12104548	12104549	Aats-thr	0.5	0.8	0.65
chr2L	12105686	12105687	Aats-thr	2.8	2.5	2.65
chr2L	12106705	12106706	Aats-thr	1.7	1.4	1.55
chr2L	12106708	12106709	Aats-thr	0.9	1.4	1.15
chr2L	12108828	12108829	Rab6	2	3.3	2.65
chr2L	12153519	12153520	CG31760	1	1	1
chr2L	12163456	12163457	CG31760	1	1.8	1.4
chr2L	12168267	12168268	CG31760	1	1.3	1.15
chr2L	12168367	12168368	CG31760	0.8	0.8	0.8
chr2L	12168467	12168468	CG31760	0.7	2.9	1.8
chr2L	12168759	12168760	CG31760	1	3.4	2.2
chr2L	12168854	12168855	CG31760	1.9	0.8	1.35
chr2L	12168953	12168954	CG31760	0.7	1	0.85
chr2L	12169653	12169654	CG31760	11.1	7.1	9.1
chr2L	12169911	12169912	CG31760	1	1.3	1.15
chr2L	12170237	12170238	CG31760	2	1.8	1.9
chr2L	12170380	12170381	CG31760	2.2	3	2.6
chr2L	12241662	12241663	aret	9.5	4.5	7
chr2L	123045	123046	CG11455	4.4	2.9	3.65
chr2L	123045	123046	CR44969	4.4	2.9	3.65
chr2L	12313047	12313048	aret	3.3	5.3	4.3
chr2L	123160	123161	CG11455	2.6	1.4	2
chr2L	123160	123161	CR44969	2.6	1.4	2
chr2L	123426	123427	CG11455	0.5	1	0.75
chr2L	123426	123427	CR44969	0.5	1	0.75
chr2L	123743	123744	CG11455	0.5	1.1	0.8
chr2L	123743	123744	CR44969	0.5	1.1	0.8
chr2L	12393496	12393497	bru-2	33.3	40	36.65
chr2L	12393503	12393504	bru-2	33.3	40	36.65
chr2L	12396827	12396828	bru-2	11.1	11.1	11.1
chr2L	123977	123978	CG11455	0.5	1	0.75
chr2L	123977	123978	CR44969	0.5	1	0.75
chr2L	12426956	12426957	CG5446	7.7	7.7	7.7
chr2L	12431540	12431541	SC35	6.3	4.5	5.4
chr2L	12431806	12431807	SC35	3	3.4	3.2
chr2L	12432345	12432346	SC35	1.1	2.6	1.85
chr2L	12432455	12432456	SC35	1.2	1.4	1.3
chr2L	12455778	12455779	bun	0.3	0.4	0.35
chr2L	12456388	12456389	bun	0.3	0.32	0.31
chr2L	12456479	12456480	bun	0.6	0.3	0.45
chr2L	12456535	12456536	bun	1.1	0.9	1
chr2L	12456772	12456773	bun	0.4	0.3	0.35
chr2L	12456883	12456884	bun	0.5	0.6	0.55
chr2L	12457080	12457081	bun	0.3	0.92	0.61
chr2L	12457284	12457285	bun	0.92	0.3	0.61
chr2L	12460794	12460795	bun	0.6	1	0.8
chr2L	12460808	12460809	bun	0.5	0.7	0.6
chr2L	12460816	12460817	bun	0.6	0.7	0.65
chr2L	12483280	12483281	bun	4	4.3	4.15
chr2L	12516877	12516878	bun	1.7	2.9	2.3
chr2L	12536985	12536986	bun	1.1	1.2	1.15
chr2L	12537077	12537078	bun	2.5	1.9	2.2
chr2L	12537800	12537801	bun	1.4	1.7	1.55
chr2L	12540527	12540528	bun	2.4	4.5	3.45
chr2L	12540764	12540765	bun	1.6	2.5	2.05
chr2L	1256670	1256671	robo3	6.3	5	5.65
chr2L	12696116	12696117	PICK1	5	7.1	6.05
chr2L	12698239	12698240	PICK1	1.6	1.7	1.65
chr2L	12708509	12708510	CG6180	0.88	1.3	1.09
chr2L	12716799	12716800	Pih1D1	3.8	3.2	3.5
chr2L	12717546	12717547	Pih1D1	3.2	5	4.1
chr2L	12719811	12719812	MRP	7.1	14.3	10.7
chr2L	12722392	12722393	MRP	2	2.1	2.05
chr2L	12725738	12725739	MRP	3.3	4	3.65
chr2L	12744176	12744177	MRP	3.5	1.9	2.7
chr2L	12817556	12817557	kek1	1.4	1.5	1.45
chr2L	12817620	12817621	kek1	1.7	2.1	1.9
chr2L	12818233	12818234	kek1	1	3.4	2.2
chr2L	12818566	12818567	kek1	1.5	2.1	1.8
chr2L	12818882	12818883	kek1	2.3	2.5	2.4
chr2L	12820253	12820254	kek1	1.7	1.5	1.6
chr2L	12820513	12820514	kek1	1.4	1.5	1.45
chr2L	12820592	12820593	kek1	1	1.4	1.2
chr2L	12821574	12821575	kek1	2.5	2.4	2.45
chr2L	12821586	12821587	kek1	1.95	2.1	2.02
chr2L	12822141	12822142	kek1	1.3	2.6	1.95
chr2L	12822321	12822322	kek1	2.2	2.3	2.25
chr2L	12822323	12822324	kek1	2.9	3.7	3.3
chr2L	1289645	1289646	robo3	2.1	2.4	2.25
chr2L	128969	128970	CG3164	0.8	1.6	1.2
chr2L	1293647	1293648	robo3	10.8	3.8	7.3
chr2L	1294120	1294121	robo3	2.2	2.9	2.55
chr2L	1294520	1294521	robo3	1.2	2.7	1.95
chr2L	1294603	1294604	robo3	2.6	2.7	2.65
chr2L	12976629	12976630	Vha68-2	1.8	3	2.4
chr2L	13000861	13000862	Vha68-1	0.5	0.8	0.65
chr2L	13001064	13001065	Vha68-1	0.4	0.7	0.55
chr2L	13001074	13001075	Vha68-1	0.2	0.4	0.3
chr2L	13001101	13001102	Vha68-1	0.32	0.75	0.54
chr2L	13001133	13001134	Vha68-1	0.4	0.3	0.35
chr2L	13001315	13001316	Vha68-1	0.3	0.55	0.43
chr2L	13001479	13001480	Vha68-1	0.3	0.2	0.25
chr2L	13002426	13002427	Vha68-1	0.92	1.8	1.36
chr2L	13004058	13004059	Vha68-1	0.2	0.2	0.2
chr2L	13018155	13018156	CG9934	2.4	3.8	3.1
chr2L	13029591	13029592	CG9932	4.8	7.7	6.25
chr2L	13030291	13030292	CG9932	4.2	5.3	4.75
chr2L	13142860	13142861	CG9928	0.2	4.3	2.25
chr2L	13163324	13163325	DnaJ-H	0.7	10.3	5.5
chr2L	13163347	13163348	DnaJ-H	1.7	1.2	1.45
chr2L	13163625	13163626	DnaJ-H	0.5	0.8	0.65
chr2L	13164448	13164449	DnaJ-H	0.5	0.7	0.6
chr2L	13164837	13164838	DnaJ-H	0.5	0.8	0.65
chr2L	13168594	13168595	Sir2	1.3	2	1.65
chr2L	13168995	13168996	Sir2	1.7	2.2	1.95
chr2L	13169079	13169080	Sir2	1.3	2.4	1.85
chr2L	13169104	13169105	Sir2	2.3	2.2	2.25
chr2L	13169125	13169126	Sir2	1.1	3	2.05
chr2L	13169705	13169706	Sfmbt	3.3	7.1	5.2
chr2L	13169832	13169833	Sfmbt	4.5	2.1	3.3
chr2L	13170135	13170136	Sfmbt	5	12.5	8.75
chr2L	13171789	13171790	Sfmbt	2.9	3.1	3
chr2L	13171941	13171942	Sfmbt	4.95	4.3	4.62
chr2L	13172111	13172112	Sfmbt	4.5	7.7	6.1
chr2L	13172953	13172954	Sfmbt	2.7	7.4	5.05
chr2L	13178311	13178312	CG5439	5.6	10	7.8
chr2L	13178580	13178581	CG5439	6.1	11.3	8.7
chr2L	13181349	13181350	CG31849	5.3	27.3	16.3
chr2L	13182315	13182316	CG5287	8.3	6.7	7.5
chr2L	13182369	13182370	CG5287	8.3	6.3	7.3
chr2L	13185417	13185418	CG16974	0.9	1.3	1.1
chr2L	13186345	13186346	CG16974	0.6	0.8	0.7
chr2L	13186520	13186521	CG16974	0.62	1.35	0.99
chr2L	13186739	13186740	CG16974	0.7	0.7	0.7
chr2L	13187090	13187091	CG16974	1.3	0.8	1.05
chr2L	13187831	13187832	CG16974	1.2	2.3	1.75
chr2L	13188818	13188819	CG16974	0.9	1	0.95
chr2L	13188838	13188839	CG16974	0.9	1	0.95
chr2L	13189503	13189504	CG16974	0.8	0.9	0.85
chr2L	13193893	13193894	Edem2	3.2	5.9	4.55
chr2L	13196351	13196352	Edem2	3.2	11.1	7.15
chr2L	13200769	13200770	CG16972	12.5	10	11.25
chr2L	13201818	13201819	CG16972	3.7	5.9	4.8
chr2L	13208111	13208112	Pect	0.3	0.4	0.35
chr2L	13208303	13208304	Pect	0.4	0.6	0.5
chr2L	13209563	13209564	Pect	0.4	0.8	0.6
chr2L	13210450	13210451	Pect	0.7	1.3	1
chr2L	13210661	13210662	Pect	2	10.5	6.25
chr2L	13210690	13210691	Pect	0.9	1.9	1.4
chr2L	13213720	13213721	kek4	2	5.9	3.95
chr2L	13216543	13216544	CG9426	2	4.5	3.25
chr2L	13216543	13216544	snRNA:U2:34ABb	2	4.5	3.25
chr2L	13216543	13216544	snRNA:U2:34ABc	2	4.5	3.25
chr2L	13216613	13216614	CG9426	2.5	2	2.25
chr2L	13216613	13216614	snRNA:U2:34ABb	2.5	2	2.25
chr2L	13216613	13216614	snRNA:U2:34ABc	2.5	2	2.25
chr2L	13216625	13216626	CG9426	2.4	2.3	2.35
chr2L	13216625	13216626	snRNA:U2:34ABb	2.4	2.3	2.35
chr2L	13216625	13216626	snRNA:U2:34ABc	2.4	2.3	2.35
chr2L	13216833	13216834	CG9426	2.7	4.2	3.45
chr2L	13216833	13216834	snRNA:U2:34ABb	2.7	4.2	3.45
chr2L	13216833	13216834	snRNA:U2:34ABc	2.7	4.2	3.45
chr2L	13217264	13217265	CG9426	4.9	7.9	6.4
chr2L	13217264	13217265	snRNA:U2:34ABb	4.9	7.9	6.4
chr2L	13217264	13217265	snRNA:U2:34ABc	4.9	7.9	6.4
chr2L	132186	132187	CG11455	0.2	0.3	0.25
chr2L	132186	132187	Gs1	0.2	0.3	0.25
chr2L	13219037	13219038	CG9426	2.4	3.83	3.12
chr2L	13219037	13219038	snRNA:U2:34ABb	2.4	3.83	3.12
chr2L	13219037	13219038	snRNA:U2:34ABc	2.4	3.83	3.12
chr2L	13219454	13219455	CG9426	1.5	1.8	1.65
chr2L	13219454	13219455	snRNA:U2:34ABb	1.5	1.8	1.65
chr2L	13219454	13219455	snRNA:U2:34ABc	1.5	1.8	1.65
chr2L	13223158	13223159	CG16812	1.9	4.3	3.1
chr2L	132650	132651	CG11455	0.5	0.8	0.65
chr2L	132650	132651	Gs1	0.5	0.8	0.65
chr2L	13284274	13284275	Drep-4	3.2	4.3	3.75
chr2L	13296686	13296687	CG31729	2	3.1	2.55
chr2L	13299697	13299698	CG31729	1.3	1.45	1.38
chr2L	13301462	13301463	CG31729	2.7	3.7	3.2
chr2L	13301851	13301852	CG43778	1.4	2.2	1.8
chr2L	13301853	13301854	CG43778	8.7	19.6	14.15
chr2L	13301854	13301855	CG43778	13.2	23.9	18.55
chr2L	13301948	13301949	CG43778	1.7	0.8	1.25
chr2L	13302030	13302031	CG43778	0.6	0.9	0.75
chr2L	13302045	13302046	CG43778	1.1	0.8	0.95
chr2L	13302046	13302047	CG43778	0.8	1.2	1
chr2L	13302071	13302072	CG43778	0.6	0.8	0.7
chr2L	13302072	13302073	CG43778	5	13.8	9.4
chr2L	13302262	13302263	CG43778	0.7	1	0.85
chr2L	13302832	13302833	CG43778	0.8	1.3	1.05
chr2L	13302886	13302887	CG43778	0.6	2.2	1.4
chr2L	13302926	13302927	CG43778	1.5	2.6	2.05
chr2L	13302951	13302952	CG43778	0.7	1.1	0.9
chr2L	13303027	13303028	CG43778	1.2	1.4	1.3
chr2L	13303039	13303040	CG43778	1.4	1.4	1.4
chr2L	13303040	13303041	CG43778	1.4	1.4	1.4
chr2L	13303053	13303054	CG43778	6.1	1.4	3.75
chr2L	13303308	13303309	CG43778	0.8	1.2	1
chr2L	13303367	13303368	CG43778	0.7	1.2	0.95
chr2L	13303653	13303654	CG43778	0.9	1.6	1.25
chr2L	13303718	13303719	CG43778	2.3	6.7	4.5
chr2L	13303906	13303907	CG43778	0.9	1.1	1
chr2L	13303972	13303973	CG43778	0.9	1.3	1.1
chr2L	13304273	13304274	CG43778	0.7	1.4	1.05
chr2L	13304290	13304291	CG43778	1.3	1.4	1.35
chr2L	13304645	13304646	CG43778	2.1	3.3	2.7
chr2L	13304896	13304897	CG43778	1.9	1.2	1.55
chr2L	13305000	13305001	CG43778	2.2	4.8	3.5
chr2L	13305017	13305018	CG16825	2.8	1.7	2.25
chr2L	13305153	13305154	CG43778	1.5	1.8	1.65
chr2L	13305526	13305527	CG43778	1	1.1	1.05
chr2L	13305530	13305531	CG43778	2.1	1.6	1.85
chr2L	13308480	13308481	CG43778	1.4	1.6	1.5
chr2L	13309145	13309146	CG43778	1.3	2.2	1.75
chr2L	13309203	13309204	CG43778	1.3	1.7	1.5
chr2L	13310002	13310003	CG43778	1.3	2.9	2.1
chr2L	133255	133256	CG11455	0.4	0.6	0.5
chr2L	133255	133256	Gs1	0.4	0.6	0.5
chr2L	13331045	13331046	CG43778	0.5	0.9	0.7
chr2L	133470	133471	CG11455	0.4	0.5	0.45
chr2L	133470	133471	Gs1	0.4	0.5	0.45
chr2L	13349963	13349964	CG9395	1.5	2.2	1.85
chr2L	13350745	13350746	CG9395	1.4	9.5	5.45
chr2L	13350883	13350884	CG9395	4.2	1.5	2.85
chr2L	13351773	13351774	CG9395	1.3	3.5	2.4
chr2L	13352129	13352130	CG9395	1.5	2.2	1.85
chr2L	13352550	13352551	CG9395	1.2	1.8	1.5
chr2L	13352604	13352605	CG9395	1.5	1.7	1.6
chr2L	13353122	13353123	CG9395	1.6	2.2	1.9
chr2L	133591	133592	CG11455	0.4	0.8	0.6
chr2L	133591	133592	Gs1	0.4	0.8	0.6
chr2L	13359990	13359991	CG9377	1	0.4	0.7
chr2L	13361509	13361510	CG9377	0.7	0.2	0.45
chr2L	13361526	13361527	CG9377	2.6	0.4	1.5
chr2L	133622	133623	CG11455	0.4	0.7	0.55
chr2L	133622	133623	Gs1	0.4	0.7	0.55
chr2L	13363854	13363855	Nnp-1	5.3	3.3	4.3
chr2L	13363883	13363884	Nnp-1	2.2	4.8	3.5
chr2L	13366892	13366893	CG6523	1.4	2	1.7
chr2L	13370302	13370303	CG9306	2.8	2.6	2.7
chr2L	13370306	13370307	CG9306	1.2	2.5	1.85
chr2L	13370861	13370862	CG9306	0.7	0.4	0.55
chr2L	13370904	13370905	CG9306	1.95	1.95	1.95
chr2L	13374423	13374424	CG6565	2.3	5.9	4.1
chr2L	13377732	13377733	CG9302	2.6	4.3	3.45
chr2L	13378103	13378104	CG9302	2.9	9.1	6
chr2L	13381612	13381613	beta'COP	2.3	3.8	3.05
chr2L	13382059	13382060	beta'COP	1.8	3.7	2.75
chr2L	13382083	13382084	beta'COP	1.6	2.6	2.1
chr2L	13382895	13382896	loqs	1.3	1	1.15
chr2L	13382897	13382898	loqs	1.3	1	1.15
chr2L	13382946	13382947	loqs	0.78	2.93	1.86
chr2L	13382976	13382977	loqs	0.7	3.7	2.2
chr2L	13383009	13383010	loqs	1.1	1	1.05
chr2L	13383160	13383161	loqs	0.5	0.6	0.55
chr2L	13383323	13383324	loqs	0.6	0.9	0.75
chr2L	13383459	13383460	loqs	0.4	0.6	0.5
chr2L	13383460	13383461	loqs	0.62	5.62	3.12
chr2L	13384008	13384009	loqs	0.5	0.9	0.7
chr2L	13384752	13384753	loqs	0.8	2.2	1.5
chr2L	13384996	13384997	loqs	0.5	0.8	0.65
chr2L	13385040	13385041	loqs	1.6	0.8	1.2
chr2L	13385230	13385231	loqs	2	11.1	6.55
chr2L	13385251	13385252	loqs	1.1	0.7	0.9
chr2L	13385342	13385343	loqs	1.2	2.8	2
chr2L	13385343	13385344	loqs	0.6	0.9	0.75
chr2L	13385387	13385388	loqs	1.1	1	1.05
chr2L	13385519	13385520	loqs	4.8	1.3	3.05
chr2L	13385521	13385522	loqs	0.9	1.3	1.1
chr2L	13385526	13385527	loqs	2.9	3.8	3.35
chr2L	13385533	13385534	loqs	0.9	4.9	2.9
chr2L	13385620	13385621	loqs	4.7	9.6	7.15
chr2L	13385664	13385665	loqs	1.6	2.2	1.9
chr2L	13386651	13386652	CG9293	3.4	4	3.7
chr2L	13386844	13386845	CG9293	2.9	5.3	4.1
chr2L	133869	133870	CG11455	0.52	1.35	0.94
chr2L	133869	133870	Gs1	0.52	1.35	0.94
chr2L	133933	133934	CG11455	0.3	0.8	0.55
chr2L	133933	133934	Gs1	0.3	0.8	0.55
chr2L	13394198	13394199	RpL24	0.9	0.5	0.7
chr2L	13394203	13394204	RpL24	0.4	2.2	1.3
chr2L	133945	133946	CG11455	0.3	0.5	0.4
chr2L	133945	133946	Gs1	0.3	0.5	0.4
chr2L	134338	134339	CG11455	1	1.8	1.4
chr2L	134338	134339	Gs1	1	1.8	1.4
chr2L	134346	134347	CG11455	1.2	5.9	3.55
chr2L	134346	134347	Gs1	1.2	5.9	3.55
chr2L	13444650	13444651	CG42784	2.4	6.9	4.65
chr2L	13446667	13446668	CG42784	2.5	4.7	3.6
chr2L	13474139	13474140	CG42784	3.6	6.5	5.05
chr2L	13474176	13474177	CG42784	2.3	2.6	2.45
chr2L	13475156	13475157	CG42784	1.6	2.1	1.85
chr2L	13483580	13483581	CG42784	1.7	1.8	1.75
chr2L	13483958	13483959	CG42784	1.4	2	1.7
chr2L	13484252	13484253	CG42784	3.1	4.8	3.95
chr2L	13484495	13484496	CG42784	1.9	2.3	2.1
chr2L	13485383	13485384	CG42784	2.7	2	2.35
chr2L	13486911	13486912	CG42784	4.2	2.5	3.35
chr2L	13487185	13487186	CG42784	3.3	6.7	5
chr2L	13489380	13489381	CG42784	2.8	2.1	2.45
chr2L	13491154	13491155	CG42784	2	4.3	3.15
chr2L	13493662	13493663	CG42784	1.7	1.6	1.65
chr2L	13494744	13494745	CG42784	1.5	1.4	1.45
chr2L	13494972	13494973	CG42784	2.9	1.2	2.05
chr2L	13499801	13499802	CG42784	0.4	0.4	0.4
chr2L	13499852	13499853	CG42784	0.4	0.4	0.4
chr2L	13499858	13499859	CG42784	0.4	0.4	0.4
chr2L	13499935	13499936	CG42784	0.5	0.4	0.45
chr2L	13500026	13500027	CG42784	0.4	0.5	0.45
chr2L	13500260	13500261	CG42784	0.4	0.3	0.35
chr2L	13500298	13500299	CG42784	0.8	0.7	0.75
chr2L	13501111	13501112	B4	1.1	1.1	1.1
chr2L	13501126	13501127	B4	1.2	1.3	1.25
chr2L	13501511	13501512	B4	1	1	1
chr2L	13501514	13501515	B4	1	1	1
chr2L	13501850	13501851	B4	1.6	1.6	1.6
chr2L	13502187	13502188	B4	4.9	5.9	5.4
chr2L	13502301	13502302	B4	0.8	1	0.9
chr2L	13502364	13502365	B4	0.9	2.6	1.75
chr2L	13502400	13502401	B4	2.2	1.9	2.05
chr2L	13502417	13502418	B4	1	0.9	0.95
chr2L	13502439	13502440	B4	0.8	1.8	1.3
chr2L	13502512	13502513	B4	0.8	0.8	0.8
chr2L	13502534	13502535	B4	0.9	1	0.95
chr2L	13502547	13502548	B4	1.23	1.57	1.4
chr2L	13502550	13502551	B4	1	4.8	2.9
chr2L	13502551	13502552	B4	1.3	4.7	3
chr2L	13502665	13502666	B4	2.6	1.6	2.1
chr2L	13503157	13503158	B4	1.2	1.6	1.4
chr2L	13503165	13503166	B4	6.05	7.92	6.98
chr2L	13503169	13503170	B4	1.7	4.3	3
chr2L	13503285	13503286	B4	2.4	2.3	2.35
chr2L	13503287	13503288	B4	11.3	8.1	9.7
chr2L	13503291	13503292	B4	1.4	2.1	1.75
chr2L	13503306	13503307	B4	6.1	19.2	12.65
chr2L	13503684	13503685	B4	1.1	1.4	1.25
chr2L	13503844	13503845	B4	3.6	3.65	3.62
chr2L	13503964	13503965	B4	1.3	1.4	1.35
chr2L	13504514	13504515	B4	0.9	1.3	1.1
chr2L	13504617	13504618	B4	1.2	1.9	1.55
chr2L	13504824	13504825	B4	4.8	3.4	4.1
chr2L	13505104	13505105	B4	2.05	4.58	3.31
chr2L	13505167	13505168	B4	2.8	1.8	2.3
chr2L	13505366	13505367	B4	1.4	3.4	2.4
chr2L	13505677	13505678	B4	1.6	3.8	2.7
chr2L	13505764	13505765	B4	1.1	1.8	1.45
chr2L	13506086	13506087	B4	1.4	2.3	1.85
chr2L	13506269	13506270	B4	3.6	1.8	2.7
chr2L	13508653	13508654	B4	2.6	2.7	2.65
chr2L	13509536	13509537	B4	4.1	2.6	3.35
chr2L	13546950	13546951	B4	5.3	2.6	3.95
chr2L	13551532	13551533	kuz	1.8	2.9	2.35
chr2L	13634973	13634974	kuz	2.7	2.3	2.5
chr2L	13635106	13635107	kuz	2.9	4.2	3.55
chr2L	13636159	13636160	kuz	3.1	3.4	3.25
chr2L	13638586	13638587	kuz	2.4	3	2.7
chr2L	13638697	13638698	kuz	2.6	4	3.3
chr2L	13684443	13684444	CG31814	1.9	2.2	2.05
chr2L	13772464	13772465	TM9SF4	1.3	1.6	1.45
chr2L	13773058	13773059	TM9SF4	2	2.2	2.1
chr2L	13773239	13773240	TM9SF4	2.2	7.1	4.65
chr2L	13773472	13773473	TM9SF4	1.7	2.7	2.2
chr2L	13781593	13781594	p38b	2.1	3.8	2.95
chr2L	13781981	13781982	p38b	4.3	4.5	4.4
chr2L	13782327	13782328	CG16890	1.7	5.6	3.65
chr2L	13785185	13785186	CR44847	3.6	6.7	5.15
chr2L	13785422	13785423	CR44847	2.6	4.2	3.4
chr2L	13786995	13786996	CG31731	2.2	3.2	2.7
chr2L	13787106	13787107	CG31731	3.3	5.6	4.45
chr2L	13787419	13787420	CG31731	2.6	5.3	3.95
chr2L	13789444	13789445	CG31731	2.6	5.7	4.15
chr2L	13789447	13789448	CG31731	2.1	2.1	2.1
chr2L	13789996	13789997	CG31731	2.6	3	2.8
chr2L	13809665	13809666	adat	1.2	1.8	1.5
chr2L	13809689	13809690	adat	0.3	0.4	0.35
chr2L	13809883	13809884	CAH1	0.3	0.4	0.35
chr2L	13811981	13811982	CG16865	5	5.3	5.15
chr2L	13812300	13812301	CG16865	4.8	9.1	6.95
chr2L	13816038	13816039	Sos	1.2	1.6	1.4
chr2L	13816805	13816806	Sos	4.4	1.4	2.9
chr2L	13818385	13818386	Sos	6.1	6.5	6.3
chr2L	13819001	13819002	Sos	2.4	2.6	2.5
chr2L	13819495	13819496	Sos	2.9	6.7	4.8
chr2L	13828141	13828142	Arpc1	1.9	1.9	1.9
chr2L	13828655	13828656	Arpc1	1.5	1.4	1.45
chr2L	13828739	13828740	Arpc1	1.4	2.2	1.8
chr2L	13828804	13828805	Arpc1	1.1	1.4	1.25
chr2L	13828853	13828854	Arpc1	1	2.1	1.55
chr2L	13829030	13829031	Arpc1	0.7	1.3	1
chr2L	13829575	13829576	Arpc1	0.9	2	1.45
chr2L	13829578	13829579	Arpc1	0.9	4.1	2.5
chr2L	13831654	13831655	CG33649	2.2	3.7	2.95
chr2L	13831654	13831655	DNApol-gamma35	2.2	3.7	2.95
chr2L	13832450	13832451	CG33649	1.8	3.4	2.6
chr2L	13832450	13832451	DNApol-gamma35	1.8	3.4	2.6
chr2L	13832718	13832719	CG33649	2.1	6.3	4.2
chr2L	13832718	13832719	DNApol-gamma35	2.1	6.3	4.2
chr2L	13834959	13834960	mRpS23	7.7	9.1	8.4
chr2L	13896113	13896114	CenG1A	2.3	3.6	2.95
chr2L	13896591	13896592	CenG1A	1.8	2.3	2.05
chr2L	13897477	13897478	CenG1A	11.1	14.18	12.64
chr2L	13897537	13897538	CenG1A	2.2	2.2	2.2
chr2L	13899076	13899077	Smg5	1	1.3	1.15
chr2L	13899653	13899654	Smg5	1.1	1.3	1.2
chr2L	13901210	13901211	Smg5	1.2	1.6	1.4
chr2L	13902284	13902285	Smg5	1.1	3.9	2.5
chr2L	13902959	13902960	Smg5	1.1	1.4	1.25
chr2L	13903457	13903458	Smg5	2.3	1.4	1.85
chr2L	13965072	13965073	NimB2	1.4	4	2.7
chr2L	13965582	13965583	NimB2	0.9	2.2	1.55
chr2L	13978051	13978052	Cyp28a5	0.7	0.9	0.8
chr2L	14016405	14016406	bgm	5.3	5.3	5.3
chr2L	14061065	14061066	nAChRalpha5	1.4	1.7	1.55
chr2L	14061899	14061900	nAChRalpha5	1	2.7	1.85
chr2L	14076846	14076847	nAChRalpha5	0.7	1.3	1
chr2L	14085534	14085535	nAChRalpha5	4.5	5	4.75
chr2L	14085995	14085996	nAChRalpha5	5.9	5	5.45
chr2L	14088772	14088773	nAChRalpha5	1	0.9	0.95
chr2L	14089141	14089142	nAChRalpha5	0.8	1.9	1.35
chr2L	14089194	14089195	nAChRalpha5	1	1.3	1.15
chr2L	14089575	14089576	nAChRalpha5	1.2	1	1.1
chr2L	14091164	14091165	nAChRalpha5	2	2.35	2.17
chr2L	14091329	14091330	nAChRalpha5	0.6	1	0.8
chr2L	14091701	14091702	nAChRalpha5	0.7	0.8	0.75
chr2L	14091719	14091720	nAChRalpha5	0.7	1.6	1.15
chr2L	14091804	14091805	nAChRalpha5	0.5	0.6	0.55
chr2L	14091899	14091900	nAChRalpha5	1	1.1	1.05
chr2L	14092092	14092093	nAChRalpha5	1	1.1	1.05
chr2L	14092176	14092177	nAChRalpha5	0.7	0.4	0.55
chr2L	14092190	14092191	nAChRalpha5	0.4	0.4	0.4
chr2L	14092245	14092246	nAChRalpha5	0.5	0.7	0.6
chr2L	14092295	14092296	nAChRalpha5	0.5	0.5	0.5
chr2L	14092558	14092559	nAChRalpha5	0.9	0.5	0.7
chr2L	14092599	14092600	nAChRalpha5	0.8	1.1	0.95
chr2L	14092657	14092658	nAChRalpha5	1	0.9	0.95
chr2L	14092671	14092672	nAChRalpha5	1.4	0.9	1.15
chr2L	14092687	14092688	nAChRalpha5	0.7	1	0.85
chr2L	14093072	14093073	nAChRalpha5	0.9	0.9	0.9
chr2L	14093096	14093097	nAChRalpha5	1.6	1.3	1.45
chr2L	14093158	14093159	nAChRalpha5	2	1.7	1.85
chr2L	14093183	14093184	nAChRalpha5	1.5	1.5	1.5
chr2L	14093451	14093452	nAChRalpha5	1.1	0.9	1
chr2L	14093483	14093484	nAChRalpha5	1	0.9	0.95
chr2L	14093669	14093670	nAChRalpha5	0.9	0.8	0.85
chr2L	14093750	14093751	nAChRalpha5	1.3	1.3	1.3
chr2L	14134866	14134867	CG17341	5.3	4.3	4.8
chr2L	14157553	14157554	CG17341	3.2	3.1	3.15
chr2L	14184840	14184841	Dyrk2	0.9	8.6	4.75
chr2L	14184842	14184843	Dyrk2	0.9	1.6	1.25
chr2L	14185226	14185227	Dyrk2	1.9	6.5	4.2
chr2L	14185264	14185265	Dyrk2	1	3.4	2.2
chr2L	14185900	14185901	Dyrk2	2.6	1.8	2.2
chr2L	14186535	14186536	Dyrk2	1.3	2	1.65
chr2L	14186972	14186973	Dyrk2	2.4	1.5	1.95
chr2L	14187104	14187105	Dyrk2	1.6	2.1	1.85
chr2L	14188892	14188893	Dyrk2	9.97	2.98	6.48
chr2L	141954	141955	CG11455	1.3	2	1.65
chr2L	14195937	14195938	Dyrk2	1	2.3	1.65
chr2L	14196222	14196223	Dyrk2	1	2	1.5
chr2L	14196938	14196939	Dyrk2	2	5	3.5
chr2L	14196944	14196945	Dyrk2	1.9	1.9	1.9
chr2L	14197067	14197068	Dyrk2	1.2	1.2	1.2
chr2L	142123	142124	CG11455	1.1	1.8	1.45
chr2L	14233994	14233995	Dyrk2	1.1	3.8	2.45
chr2L	14334282	14334283	CG33090	1	4	2.5
chr2L	14341365	14341366	CG33090	1.9	4.1	3
chr2L	14341388	14341389	CG33090	1.5	1.7	1.6
chr2L	14345188	14345189	CG33090	1	1.2	1.1
chr2L	14345329	14345330	CG33090	1.3	1.4	1.35
chr2L	14357418	14357419	Rab14	0.6	1	0.8
chr2L	14358046	14358047	Rab14	0.7	0.8	0.75
chr2L	14358153	14358154	Rab14	0.7	1.8	1.25
chr2L	14358242	14358243	Rab14	1	4.5	2.75
chr2L	14358413	14358414	Rab14	1.1	1.1	1.1
chr2L	14358512	14358513	Rab14	1.2	1.1	1.15
chr2L	14392726	14392727	elB	3.1	5.6	4.35
chr2L	14491322	14491323	noc	2.2	3	2.6
chr2L	14491873	14491874	noc	1.9	2.3	2.1
chr2L	14492523	14492524	noc	1.6	3.6	2.6
chr2L	14493611	14493612	noc	1.1	2.1	1.6
chr2L	145307	145308	CG42399	4.2	3.1	3.65
chr2L	145852	145853	CG11455	3.8	5	4.4
chr2L	14605028	14605029	osp	6.3	5	5.65
chr2L	14617282	14617283	Adh	0	0.1	0.05
chr2L	14617282	14617283	Adhr	0	0.1	0.05
chr2L	14617301	14617302	Adh	0	0.1	0.05
chr2L	14617301	14617302	Adhr	0	0.1	0.05
chr2L	14617309	14617310	Adh	0.4	0.1	0.25
chr2L	14617309	14617310	Adhr	0.4	0.1	0.25
chr2L	14617328	14617329	Adh	0.1	0.1	0.1
chr2L	14617328	14617329	Adhr	0.1	0.1	0.1
chr2L	14688517	14688518	osp	9.1	10	9.55
chr2L	147358	147359	CG42399	3.3	4.5	3.9
chr2L	14743616	14743617	CG34166	0.4	1.4	0.9
chr2L	148495	148496	CG11455	5.3	3.4	4.35
chr2L	14907640	14907641	CG42313	3.8	4.5	4.15
chr2L	14908065	14908066	CG42313	2	1.9	1.95
chr2L	14912024	14912025	CG42313	3.3	2.6	2.95
chr2L	14917208	14917209	CG42313	2	1.7	1.85
chr2L	14922080	14922081	CG42313	1.9	2.3	2.1
chr2L	15016839	15016840	GABA-B-R1	3.7	7.7	5.7
chr2L	15026231	15026232	GABA-B-R1	0.9	1.4	1.15
chr2L	15030098	15030099	GABA-B-R1	8.1	2.7	5.4
chr2L	15030528	15030529	GABA-B-R1	1.5	2.6	2.05
chr2L	15030609	15030610	GABA-B-R1	2.6	1.9	2.25
chr2L	15030805	15030806	GABA-B-R1	1.1	3.3	2.2
chr2L	15032002	15032003	GABA-B-R1	1.2	2	1.6
chr2L	15032176	15032177	GABA-B-R1	1.5	2.2	1.85
chr2L	15032830	15032831	GABA-B-R1	1.2	2.2	1.7
chr2L	15032861	15032862	GABA-B-R1	1.4	1.7	1.55
chr2L	15033056	15033057	GABA-B-R1	1.8	2.1	1.95
chr2L	15033618	15033619	GABA-B-R1	1.7	3.3	2.5
chr2L	15034371	15034372	GABA-B-R1	0.9	2.1	1.5
chr2L	15034552	15034553	GABA-B-R1	3.1	2	2.55
chr2L	15034585	15034586	GABA-B-R1	1.2	2.4	1.8
chr2L	15059450	15059451	TfIIS	1.9	3.4	2.65
chr2L	15059588	15059589	TfIIS	1.3	2.9	2.1
chr2L	15062974	15062975	vas	1.1	5.8	3.45
chr2L	15063222	15063223	vas	0.72	1.05	0.88
chr2L	15063319	15063320	vig	0.3	0.8	0.55
chr2L	15063652	15063653	vig	0.7	1.2	0.95
chr2L	15063707	15063708	vig	1.1	1	1.05
chr2L	15063779	15063780	vas	0.7	1.1	0.9
chr2L	15064067	15064068	vig	0.4	0.7	0.55
chr2L	15064070	15064071	vig	2.58	4.6	3.59
chr2L	15064071	15064072	vig	5.5	8.1	6.8
chr2L	15064121	15064122	vig	1.1	6.3	3.7
chr2L	15064140	15064141	vig	0.4	0.7	0.55
chr2L	15064273	15064274	vig	1.2	2.8	2
chr2L	15064280	15064281	vig	1.2	2.6	1.9
chr2L	15064349	15064350	vig	0.7	1.12	0.91
chr2L	15064410	15064411	vig	13.5	18.4	15.95
chr2L	15064655	15064656	vas	0.3	0.7	0.5
chr2L	15064798	15064799	vas	0.4	0.62	0.51
chr2L	15065390	15065391	vig	0.4	0.5	0.45
chr2L	15087530	15087531	CG15270	2.2	2.6	2.4
chr2L	15088038	15088039	CG15270	2.8	5.6	4.2
chr2L	15088207	15088208	CG15270	5.5	1.9	3.7
chr2L	15091521	15091522	CG15270	1.3	2.2	1.75
chr2L	15095609	15095610	CG15270	2.2	1.7	1.95
chr2L	15096439	15096440	CG15270	1.2	1.4	1.3
chr2L	15096467	15096468	CG15270	1	2.2	1.6
chr2L	15096701	15096702	CG15270	2	2.2	2.1
chr2L	15096702	15096703	CG15270	4	4.3	4.15
chr2L	15096844	15096845	CG15270	10	11.1	10.55
chr2L	15166076	15166077	CG4168	4.5	4.5	4.5
chr2L	15251811	15251812	dao	4.4	2.9	3.65
chr2L	15253814	15253815	dao	1.9	2.6	2.25
chr2L	15253978	15253979	dao	1.7	2.8	2.25
chr2L	15254451	15254452	dao	3.2	4.5	3.85
chr2L	15265578	15265579	Cul3	2.2	4.2	3.2
chr2L	15265998	15265999	Cul3	2.3	2.5	2.4
chr2L	15266147	15266148	Cul3	1.5	2	1.75
chr2L	15266329	15266330	Cul3	1.6	2.3	1.95
chr2L	15266878	15266879	Cul3	2.6	4.8	3.7
chr2L	15268106	15268107	Cul3	1.8	2.3	2.05
chr2L	15274693	15274694	UK114	0.9	2.3	1.6
chr2L	152917	152918	CG42399	5	5.9	5.45
chr2L	15503986	15503987	lace	2.2	3.3	2.75
chr2L	15504354	15504355	lace	2.4	4.2	3.3
chr2L	15506	15507	l(2)gl	5.6	10	7.8
chr2L	155360	155361	CG11455	1	2	1.5
chr2L	155386	155387	CG11455	0.3	0.5	0.4
chr2L	15583754	15583755	kek3	15	11.78	13.39
chr2L	15583884	15583885	kek3	3	2.2	2.6
chr2L	155902	155903	CG11455	0.4	2.2	1.3
chr2L	15644256	15644257	CG4587	1.7	2.6	2.15
chr2L	15644542	15644543	CG4587	0.8	0.8	0.8
chr2L	15644546	15644547	CG4587	2	2.5	2.25
chr2L	15644614	15644615	CG4587	0.8	0.8	0.8
chr2L	15644840	15644841	CG4587	1.4	1	1.2
chr2L	15644913	15644914	CG4587	0.8	0.5	0.65
chr2L	15644983	15644984	CG4587	0.6	0.5	0.55
chr2L	15645322	15645323	CG4587	0.8	1.1	0.95
chr2L	15645637	15645638	CG4587	2	2.2	2.1
chr2L	15645832	15645833	CG4587	0.6	0.5	0.55
chr2L	15645988	15645989	CG4587	0.6	1.3	0.95
chr2L	15646202	15646203	CG4587	0.5	0.7	0.6
chr2L	15646621	15646622	CG4587	1	1	1
chr2L	15647190	15647191	CG4587	1.1	1.4	1.25
chr2L	15647541	15647542	CG4587	1	1.4	1.2
chr2L	15648599	15648600	CG4587	0.9	1	0.95
chr2L	15648631	15648632	CG4587	0.8	1	0.9
chr2L	15649160	15649161	CG4587	0.9	1.4	1.15
chr2L	15650954	15650955	CG4587	1.2	1.3	1.25
chr2L	15651133	15651134	CG4587	1	2.8	1.9
chr2L	15651188	15651189	CG4587	2.1	1.3	1.7
chr2L	15651525	15651526	CG4587	1	1.6	1.3
chr2L	15651860	15651861	CG4587	0.9	3.1	2
chr2L	156520	156521	CG3436	3.8	2.1	2.95
chr2L	15652037	15652038	CG4587	1.1	1.2	1.15
chr2L	15652353	15652354	CG4587	1.5	2	1.75
chr2L	15652671	15652672	CG4587	1.88	1.1	1.49
chr2L	15679230	15679231	CG43923	1.1	1.8	1.45
chr2L	15679230	15679231	CG43924	1.1	1.8	1.45
chr2L	15679230	15679231	CG44140	1.1	1.8	1.45
chr2L	15679230	15679231	CG44141	1.1	1.8	1.45
chr2L	15679230	15679231	CG4587	1.1	1.8	1.45
chr2L	15682988	15682989	CG18477	1.3	1.3	1.3
chr2L	15682988	15682989	CG18478	1.3	1.3	1.3
chr2L	15682988	15682989	CG31780	1.3	1.3	1.3
chr2L	15682988	15682989	CG31827	1.3	1.3	1.3
chr2L	15683024	15683025	CG43923	3.5	1.5	2.5
chr2L	15683024	15683025	CG43924	3.5	1.5	2.5
chr2L	15683024	15683025	CG44140	3.5	1.5	2.5
chr2L	15683024	15683025	CG44141	3.5	1.5	2.5
chr2L	15683024	15683025	CG4587	3.5	1.5	2.5
chr2L	15683044	15683045	CG43923	1.9	1.5	1.7
chr2L	15683044	15683045	CG43924	1.9	1.5	1.7
chr2L	15683044	15683045	CG44140	1.9	1.5	1.7
chr2L	15683044	15683045	CG44141	1.9	1.5	1.7
chr2L	15683044	15683045	CG4587	1.9	1.5	1.7
chr2L	157276	157277	CG3436	1.8	3.1	2.45
chr2L	157277	157278	CG3436	1.8	3.1	2.45
chr2L	157308	157309	CG3436	2.2	3.3	2.75
chr2L	15905674	15905675	beat-Ib	1.2	1.5	1.35
chr2L	15906945	15906946	beat-Ib	1	1.6	1.3
chr2L	159188	159189	spen	3	10	6.5
chr2L	15939945	15939946	beat-Ib	1.2	2	1.6
chr2L	15939968	15939969	beat-Ib	2.6	5.4	4
chr2L	1594962	1594963	CG31935	5.3	5.6	5.45
chr2L	1595211	1595212	CG31935	3.3	5.3	4.3
chr2L	1595516	1595517	CG31935	4.8	5.3	5.05
chr2L	1595744	1595745	CG31935	5.9	3	4.45
chr2L	159617	159618	spen	3.4	6.3	4.85
chr2L	1600659	1600660	CG31935	9.1	9.1	9.1
chr2L	16034295	16034296	beat-Ic	2	3.2	2.6
chr2L	16037255	16037256	beat-Ic	2.3	2.9	2.6
chr2L	16037426	16037427	beat-Ic	3.4	3.2	3.3
chr2L	16039646	16039647	beat-Ic	1.6	3.2	2.4
chr2L	16040464	16040465	beat-Ic	3.6	5	4.3
chr2L	16040502	16040503	beat-Ic	1.9	2.8	2.35
chr2L	16050414	16050415	beat-Ia	2.8	4	3.4
chr2L	16080017	16080018	beat-Ia	3.1	2.7	2.9
chr2L	1608048	1608049	CG31935	4.3	3.6	3.95
chr2L	1612614	1612615	RFeSP	0.9	2.3	1.6
chr2L	1612634	1612635	RFeSP	4.15	5.45	4.8
chr2L	1612696	1612697	RFeSP	0.6	0.9	0.75
chr2L	1613240	1613241	RFeSP	0.2	0.3	0.25
chr2L	1614011	1614012	RFeSP	0.2	0.3	0.25
chr2L	1614050	1614051	RFeSP	0.1	0.2	0.15
chr2L	1614084	1614085	RFeSP	0.1	0.4	0.25
chr2L	1614130	1614131	RFeSP	0.4	0.3	0.35
chr2L	16170601	16170602	Ca-alpha1D	2	1.6	1.8
chr2L	16170648	16170649	Ca-alpha1D	2.4	2	2.2
chr2L	16170750	16170751	Ca-alpha1D	2.4	2	2.2
chr2L	16175840	16175841	Ca-alpha1D	1.1	1.4	1.25
chr2L	16176026	16176027	Ca-alpha1D	2.7	1.6	2.15
chr2L	16176767	16176768	Ca-alpha1D	1.3	1.1	1.2
chr2L	16176880	16176881	Ca-alpha1D	1	1	1
chr2L	16177229	16177230	Ca-alpha1D	1.3	3.8	2.55
chr2L	16181898	16181899	Ca-alpha1D	1.2	1.3	1.25
chr2L	16183118	16183119	Ca-alpha1D	1	0.9	0.95
chr2L	16183167	16183168	Ca-alpha1D	0.8	0.9	0.85
chr2L	16183270	16183271	Ca-alpha1D	0.8	0.8	0.8
chr2L	16187585	16187586	Ca-alpha1D	8.7	3.6	6.15
chr2L	16189745	16189746	Ca-alpha1D	2.3	2.27	2.29
chr2L	16190190	16190191	Ca-alpha1D	1.1	1.1	1.1
chr2L	16190207	16190208	Ca-alpha1D	1.2	1	1.1
chr2L	16190383	16190384	Ca-alpha1D	2.3	1.1	1.7
chr2L	16231691	16231692	CG42817	4	6.3	5.15
chr2L	16238283	16238284	CG42817	2.6	3.4	3
chr2L	16240207	16240208	CG42817	9.1	22.2	15.65
chr2L	16245947	16245948	PRL-1	0.8	1.1	0.95
chr2L	16245960	16245961	PRL-1	3	1	2
chr2L	16246253	16246254	PRL-1	2.3	1.8	2.05
chr2L	16246517	16246518	PRL-1	0.7	0.6	0.65
chr2L	16246576	16246577	PRL-1	0.7	1.1	0.9
chr2L	16246815	16246816	PRL-1	0.7	0.9	0.8
chr2L	16248762	16248763	PRL-1	0.4	0.5	0.45
chr2L	16249693	16249694	PRL-1	0.7	0.9	0.8
chr2L	16250149	16250150	PRL-1	0.7	0.9	0.8
chr2L	16257232	16257233	PRL-1	1.02	2.7	1.86
chr2L	16263608	16263609	crp	2.2	1.5	1.85
chr2L	16264732	16264733	crp	1.5	1.4	1.45
chr2L	16265344	16265345	crp	2.7	1.7	2.2
chr2L	16266173	16266174	crp	1.4	3.3	2.35
chr2L	16290877	16290878	pkaap	3.8	5.9	4.85
chr2L	16297001	16297002	heix	12.5	8.3	10.4
chr2L	16297639	16297640	heix	4.5	5.3	4.9
chr2L	16302277	16302278	CG5869	3.2	5.9	4.55
chr2L	16305839	16305840	CG5861	6.4	3.6	5
chr2L	16306099	16306100	CG5861	0.9	1.6	1.25
chr2L	16306128	16306129	CG5861	1.3	2.1	1.7
chr2L	16306223	16306224	CG5861	0.9	1.5	1.2
chr2L	16306823	16306824	CG5861	1.62	7.6	4.61
chr2L	16307702	16307703	Syx5	2.1	3.1	2.6
chr2L	16307881	16307882	Syx5	2.6	2.8	2.7
chr2L	16308064	16308065	Syx5	4.2	4.9	4.55
chr2L	16308600	16308601	Syx5	1.4	1.9	1.65
chr2L	16309845	16309846	cni	2.9	1.7	2.3
chr2L	16310041	16310042	cni	4.55	1.6	3.08
chr2L	16314180	16314181	cact	2.3	4	3.15
chr2L	16324993	16324994	cact	1.9	2.7	2.3
chr2L	16328522	16328523	mRpL4	1.3	2.5	1.9
chr2L	16343252	16343253	CG42231	4.3	3.3	3.8
chr2L	16343252	16343253	chif	4.3	3.3	3.8
chr2L	16346231	16346232	CG42231	2.1	3.6	2.85
chr2L	16346231	16346232	chif	2.1	3.6	2.85
chr2L	16346504	16346505	CG42231	3.8	2.6	3.2
chr2L	16346504	16346505	chif	3.8	2.6	3.2
chr2L	16347196	16347197	CG42231	3	2.5	2.75
chr2L	16347196	16347197	chif	3	2.5	2.75
chr2L	16347366	16347367	CG42231	4.2	5.6	4.9
chr2L	16347366	16347367	chif	4.2	5.6	4.9
chr2L	16348984	16348985	CG42231	3.7	4.8	4.25
chr2L	16348984	16348985	chif	3.7	4.8	4.25
chr2L	16356275	16356276	CaBP1	5.1	6.7	5.9
chr2L	16404619	16404620	CG5888	0.9	1.7	1.3
chr2L	16405217	16405218	CG5888	2.8	2	2.4
chr2L	16405583	16405584	CG5888	1.2	2.9	2.05
chr2L	16446349	16446350	Idgf1	2.4	3.6	3
chr2L	16451405	16451406	Idgf3	0.6	1.1	0.85
chr2L	16467425	16467426	dac	2.7	3.1	2.9
chr2L	16469027	16469028	dac	2.9	3.8	3.35
chr2L	16472552	16472553	dac	3.6	7.1	5.35
chr2L	16473581	16473582	dac	3.6	5.9	4.75
chr2L	16484283	16484284	dac	7.1	8.3	7.7
chr2L	16506215	16506216	Tpr2	1.6	1	1.3
chr2L	16506245	16506246	Tpr2	0.8	1.4	1.1
chr2L	16506621	16506622	Tpr2	0.5	1	0.75
chr2L	16507093	16507094	Tpr2	1.5	0.9	1.2
chr2L	1653279	1653280	chinmo	2.4	2.7	2.55
chr2L	16622012	16622013	CG42389	3.8	3.6	3.7
chr2L	16622838	16622839	CG42389	6.8	9.1	7.95
chr2L	16657686	16657687	CG42389	14.3	12.5	13.4
chr2L	16659046	16659047	CG42389	3.1	5.3	4.2
chr2L	16660967	16660968	CG42389	2	2.2	2.1
chr2L	16677517	16677518	her	1.9	2.6	2.25
chr2L	16678835	16678836	her	2.3	2.7	2.5
chr2L	16685809	16685810	grp	15	29.4	22.2
chr2L	16691011	16691012	grp	1.8	2.3	2.05
chr2L	16697568	16697569	CR44975	1.18	1.68	1.43
chr2L	16704415	16704416	CG31808	0.9	0.7	0.8
chr2L	16704433	16704434	CG31808	1.9	3.1	2.5
chr2L	16704442	16704443	CG31808	0.5	0.7	0.6
chr2L	16704554	16704555	CG31808	0.4	0.7	0.55
chr2L	16704613	16704614	CG31808	0.7	0.7	0.7
chr2L	16704624	16704625	CG31808	0.4	0.68	0.54
chr2L	16704769	16704770	CG31808	0.4	0.8	0.6
chr2L	16704807	16704808	CG31808	0.7	3.2	1.95
chr2L	16704813	16704814	CG31808	0.5	1	0.75
chr2L	16704950	16704951	CG31808	0.4	0.8	0.6
chr2L	16705424	16705425	CG31808	0.4	0.9	0.65
chr2L	16705462	16705463	CG31808	0.4	0.8	0.6
chr2L	16715866	16715867	CG31808	0.7	0.9	0.8
chr2L	16719944	16719945	Cyt-c-p	9.1	16.7	12.9
chr2L	16720623	16720624	Cyt-c-p	10	11.1	10.55
chr2L	16722559	16722560	Cyt-c-p	1.1	0.4	0.75
chr2L	16723339	16723340	VhaSFD	1.2	0.9	1.05
chr2L	16723882	16723883	VhaSFD	0.4	0.6	0.5
chr2L	16724075	16724076	VhaSFD	0.4	0.6	0.5
chr2L	16724561	16724562	VhaSFD	0.5	0.7	0.6
chr2L	16724675	16724676	VhaSFD	0.6	0.9	0.75
chr2L	16730765	16730766	CG31812	5.1	4.8	4.95
chr2L	16742410	16742411	LSm7	5.3	8.3	6.8
chr2L	16742587	16742588	LSm7	8.7	12.5	10.6
chr2L	16744192	16744193	CG17912	1.9	2.2	2.05
chr2L	16744210	16744211	CG17912	1.7	2.1	1.9
chr2L	16748245	16748246	CG17912	3.7	3	3.35
chr2L	16750746	16750747	CG17912	3.1	2.3	2.7
chr2L	16751849	16751850	CG17912	1.3	3.6	2.45
chr2L	16790653	16790654	Cyt-b5-r	0.2	0.3	0.25
chr2L	16801030	16801031	Ugt36Bc	10	3.3	6.65
chr2L	16822055	16822056	mdy	10	11.1	10.55
chr2L	16829737	16829738	CG31739	3.8	3.1	3.45
chr2L	16829738	16829739	CG31739	1.9	3.8	2.85
chr2L	16830049	16830050	CG31739	1.9	6.1	4
chr2L	16870651	16870652	CR31781	5.6	6.7	6.15
chr2L	16870803	16870804	CR31781	14.3	12.5	13.4
chr2L	16878240	16878241	CR31781	50	50	50
chr2L	16887250	16887251	CG6115	0.3	0.6	0.45
chr2L	16891942	16891943	tweek	6.7	7.7	7.2
chr2L	16892354	16892355	tweek	7.1	6.7	6.9
chr2L	16894201	16894202	tweek	3.1	5.9	4.5
chr2L	16894402	16894403	tweek	4	7.1	5.55
chr2L	1690303	1690304	chinmo	2.5	4.3	3.4
chr2L	16906977	16906978	tweek	2.7	4.3	3.5
chr2L	16910712	16910713	tweek	3.8	4.2	4
chr2L	16911124	16911125	tweek	3.3	3.1	3.2
chr2L	16911313	16911314	tweek	1.7	2.6	2.15
chr2L	16912638	16912639	tweek	7.1	8.1	7.6
chr2L	16912675	16912676	tweek	1.8	2	1.9
chr2L	16916576	16916577	tweek	1.1	2	1.55
chr2L	16916583	16916584	tweek	1.3	3.6	2.45
chr2L	16916909	16916910	tweek	2.8	2.7	2.75
chr2L	1697064	1697065	chinmo	2	2.3	2.15
chr2L	16976743	16976744	beat-IIIb	1.9	1.7	1.8
chr2L	16976889	16976890	beat-IIIb	1.5	2	1.75
chr2L	1697705	1697706	chinmo	2.6	2	2.3
chr2L	1698514	1698515	chinmo	4.2	2.3	3.25
chr2L	16986052	16986053	beat-IIIb	1.4	1.9	1.65
chr2L	1698922	1698923	chinmo	1.9	1.8	1.85
chr2L	16990261	16990262	beat-IIIb	1.3	1.5	1.4
chr2L	16992871	16992872	beat-IIIb	1.3	2	1.65
chr2L	16993088	16993089	beat-IIIb	1.1	3.6	2.35
chr2L	16993289	16993290	beat-IIIb	1.5	2.2	1.85
chr2L	16993350	16993351	beat-IIIb	1.2	1.4	1.3
chr2L	16993455	16993456	beat-IIIb	2.7	2	2.35
chr2L	16993693	16993694	beat-IIIb	3.2	5.6	4.4
chr2L	16993700	16993701	beat-IIIb	2.2	2.1	2.15
chr2L	16993707	16993708	beat-IIIb	1.1	2.1	1.6
chr2L	16993757	16993758	beat-IIIb	2.1	1.6	1.85
chr2L	16993872	16993873	beat-IIIb	1.1	1.5	1.3
chr2L	1699400	1699401	chinmo	4.3	2.1	3.2
chr2L	1699599	1699600	chinmo	1.5	2.5	2
chr2L	1699663	1699664	chinmo	1.8	2.1	1.95
chr2L	1700005	1700006	chinmo	2.3	3.2	2.75
chr2L	1700520	1700521	chinmo	1.3	2.3	1.8
chr2L	1702987	1702988	chinmo	1	1.2	1.1
chr2L	1703476	1703477	chinmo	1.6	1.9	1.75
chr2L	1705679	1705680	cpb	2.4	3.3	2.85
chr2L	1708670	1708671	CR44976	2.4	4	3.2
chr2L	1709042	1709043	CR44976	2.5	3.2	2.85
chr2L	1710600	1710601	mRpL48	0.7	1.2	0.95
chr2L	1710607	1710608	mRpL48	1.3	1.1	1.2
chr2L	1710677	1710678	mRpL48	1.2	2.1	1.65
chr2L	1710986	1710987	mRpL48	2.45	3	2.73
chr2L	1711166	1711167	mRpL48	5	8.3	6.65
chr2L	1711331	1711332	frtz	5.3	5.9	5.6
chr2L	1711338	1711339	frtz	5.9	15.4	10.65
chr2L	1711490	1711491	frtz	0.7	0.6	0.65
chr2L	1711502	1711503	frtz	0.5	0.6	0.55
chr2L	17171165	17171166	beat-IIIa	5.3	4.8	5.05
chr2L	17171165	17171166	CG34106	5.3	4.8	5.05
chr2L	17171317	17171318	beat-IIIa	2.8	3.7	3.25
chr2L	17171317	17171318	CG34106	2.8	3.7	3.25
chr2L	17172732	17172733	beat-IIIa	3.6	4	3.8
chr2L	17172732	17172733	CG34106	3.6	4	3.8
chr2L	1717786	1717787	Rim2	1.3	1.8	1.55
chr2L	17187836	17187837	beat-IIIc	9.8	13	11.4
chr2L	17188303	17188304	beat-IIIc	2.9	2.1	2.5
chr2L	17188306	17188307	beat-IIIc	9.4	4.3	6.85
chr2L	17188307	17188308	beat-IIIc	21.9	28.6	25.25
chr2L	17188487	17188488	beat-IIIc	1.4	2.1	1.75
chr2L	17188577	17188578	beat-IIIc	1.4	2.1	1.75
chr2L	17188703	17188704	beat-IIIc	1.1	2	1.55
chr2L	17188833	17188834	beat-IIIc	1.5	2.4	1.95
chr2L	17189449	17189450	beat-IIIc	1.8	3.2	2.5
chr2L	17189527	17189528	beat-IIIc	2.1	3.2	2.65
chr2L	17189558	17189559	beat-IIIc	4.2	3.6	3.9
chr2L	1724960	1724961	Eno	0.4	0.3	0.35
chr2L	1725023	1725024	Eno	0.1	0.3	0.2
chr2L	1725030	1725031	Eno	0.4	0.8	0.6
chr2L	1725100	1725101	Eno	0.1	0.2	0.15
chr2L	1731414	1731415	CG17652	16.7	33.3	25
chr2L	17387521	17387522	CLIP-190	3	3.7	3.35
chr2L	17403113	17403114	CLIP-190	2.9	4	3.45
chr2L	17407526	17407527	CLIP-190	2.4	2.9	2.65
chr2L	17408899	17408900	CLIP-190	2.2	1.9	2.05
chr2L	17410087	17410088	Rpb11	1.05	2.4	1.73
chr2L	17413022	17413023	CG15141	1.8	3.7	2.75
chr2L	17413097	17413098	CG15141	6.1	2.9	4.5
chr2L	17414003	17414004	Dif	4.8	6.7	5.75
chr2L	17415595	17415596	Dif	4.5	10	7.25
chr2L	17417039	17417040	Dif	5	5	5
chr2L	17459834	17459835	BicD	1.2	1.9	1.55
chr2L	17460511	17460512	BicD	1.2	3.15	2.17
chr2L	17460671	17460672	BicD	1.7	1.9	1.8
chr2L	17463877	17463878	BicD	1.9	3.6	2.75
chr2L	17474217	17474218	Sgt	1	2.3	1.65
chr2L	17475050	17475051	Aac11	2.5	2.3	2.4
chr2L	17475077	17475078	Aac11	0.8	0.7	0.75
chr2L	17475177	17475178	Aac11	0.5	0.5	0.5
chr2L	17475420	17475421	Aac11	0.4	0.5	0.45
chr2L	17475472	17475473	Aac11	1	0.85	0.92
chr2L	17476290	17476291	Aac11	0.5	0.4	0.45
chr2L	17476465	17476466	Aac11	0.4	0.5	0.45
chr2L	17477095	17477096	Aac11	0.4	0.5	0.45
chr2L	17477140	17477141	Aac11	0.8	0.9	0.85
chr2L	17477510	17477511	Aac11	0.5	0.5	0.5
chr2L	17482541	17482542	CG6453	2	6.7	4.35
chr2L	17482583	17482584	CG6453	2.5	10	6.25
chr2L	17500728	17500729	CG6412	0.9	3.9	2.4
chr2L	1751125	1751126	CG17712	5.3	11.8	8.55
chr2L	1751239	1751240	CG17712	10	9.1	9.55
chr2L	17590293	17590294	Oli	1.4	1.7	1.55
chr2L	17590572	17590573	Oli	3.4	5.4	4.4
chr2L	17590612	17590613	Oli	1.3	2.1	1.7
chr2L	17590694	17590695	Oli	0.9	1.55	1.23
chr2L	17590741	17590742	Oli	1	1.4	1.2
chr2L	17590882	17590883	Oli	1.6	5.4	3.5
chr2L	17591642	17591643	CG6870	7.7	5.6	6.65
chr2L	17592017	17592018	CG6870	3.2	1.6	2.4
chr2L	17592139	17592140	CG6870	4.2	1.5	2.85
chr2L	17602564	17602565	Sytalpha	0.6	1.8	1.2
chr2L	17602618	17602619	Sytalpha	0.8	1.1	0.95
chr2L	17603624	17603625	Sytalpha	3.3	3.7	3.5
chr2L	17603668	17603669	Sytalpha	1	4.4	2.7
chr2L	17604025	17604026	Sytalpha	1.6	1.1	1.35
chr2L	17604160	17604161	Sytalpha	0.7	2.9	1.8
chr2L	17604246	17604247	Sytalpha	1.7	9.3	5.5
chr2L	17604270	17604271	Sytalpha	9.3	2.4	5.85
chr2L	17647906	17647907	CadN	0.9	1.4	1.15
chr2L	17648098	17648099	CadN	1	2.7	1.85
chr2L	17648921	17648922	CadN	1.4	1.7	1.55
chr2L	17649085	17649086	CadN	0.9	1.4	1.15
chr2L	17649139	17649140	CadN	1.2	1.3	1.25
chr2L	17649189	17649190	CadN	3.8	1.6	2.7
chr2L	17649199	17649200	CadN	1.5	1.7	1.6
chr2L	17649232	17649233	CadN	1.4	2.6	2
chr2L	17650052	17650053	CadN	2.5	1.3	1.9
chr2L	17650174	17650175	CadN	1	1.2	1.1
chr2L	17650345	17650346	CadN	1.5	1.8	1.65
chr2L	17650384	17650385	CadN	1.4	1.8	1.6
chr2L	17651418	17651419	CadN	1.2	1.3	1.25
chr2L	17651450	17651451	CadN	1.3	1.6	1.45
chr2L	17657451	17657452	CadN	1.03	1.1	1.06
chr2L	17657534	17657535	CadN	1.3	1.5	1.4
chr2L	17657805	17657806	CadN	1.7	1.2	1.45
chr2L	17657946	17657947	CadN	2.1	1.4	1.75
chr2L	17658735	17658736	CadN	1.8	1.8	1.8
chr2L	17661674	17661675	CadN	1.4	1.5	1.45
chr2L	17666670	17666671	CadN	1.4	4.3	2.85
chr2L	17711296	17711297	CadN	2	2.6	2.3
chr2L	17719305	17719306	CadN	1.8	3.2	2.5
chr2L	17720742	17720743	CadN	2.4	2	2.2
chr2L	17738028	17738029	CadN	1.2	2.8	2
chr2L	17738289	17738290	CadN	2.7	2.9	2.8
chr2L	17738424	17738425	CadN	2	3	2.5
chr2L	17738812	17738813	CadN	2.6	4	3.3
chr2L	17739700	17739701	CadN	2.1	4.8	3.45
chr2L	17751949	17751950	CadN	1.8	9.1	5.45
chr2L	17787710	17787711	CadN2	4	3.3	3.65
chr2L	17788481	17788482	CadN2	2.6	3.8	3.2
chr2L	17789340	17789341	CadN2	4.5	3.7	4.1
chr2L	17972744	17972745	CG5674	4.8	5	4.9
chr2L	18065058	18065059	rdo	2.4	3.4	2.9
chr2L	18066843	18066844	rdo	4.5	3.3	3.9
chr2L	18069504	18069505	rdo	3.3	5	4.15
chr2L	18070029	18070030	rdo	3.1	5	4.05
chr2L	18120118	18120119	CG5758	2.3	3	2.65
chr2L	18127829	18127830	CG5758	0.3	0.4	0.35
chr2L	18128004	18128005	CG5758	0.7	0.5	0.6
chr2L	18129223	18129224	CG5758	0.3	0.4	0.35
chr2L	18129333	18129334	CG5758	0.2	0.3	0.25
chr2L	18129423	18129424	CG5758	0.2	0.2	0.2
chr2L	18129662	18129663	CG5758	0.3	0.85	0.57
chr2L	18129814	18129815	CG5758	0.8	1.2	1
chr2L	18129974	18129975	kel	3.2	7.1	5.15
chr2L	18152141	18152142	Socs36E	2.9	8.3	5.6
chr2L	18160026	18160027	CG42750	1.7	1.4	1.55
chr2L	18160257	18160258	CG42750	2.9	1.7	2.3
chr2L	18160410	18160411	CG42750	1.8	1.6	1.7
chr2L	18161013	18161014	CG42750	2.9	4.8	3.85
chr2L	18165058	18165059	CG42750	2	2.6	2.3
chr2L	18182117	18182118	CG42750	2.2	2.9	2.55
chr2L	18182117	18182118	CG7180	2.2	2.9	2.55
chr2L	18182508	18182509	CG42750	2.1	5.7	3.9
chr2L	18182508	18182509	CG7180	2.1	5.7	3.9
chr2L	18182946	18182947	CG42750	1.6	4.7	3.15
chr2L	18182946	18182947	CG7180	1.6	4.7	3.15
chr2L	18183348	18183349	CG42750	2.6	4.5	3.55
chr2L	18183348	18183349	CG7180	2.6	4.5	3.55
chr2L	18183402	18183403	CG42750	2.4	2.9	2.65
chr2L	18183402	18183403	CG7180	2.4	2.9	2.65
chr2L	18183410	18183411	CG42750	2.1	4.3	3.2
chr2L	18183410	18183411	CG7180	2.1	4.3	3.2
chr2L	18210957	18210958	CG42750	2.1	2.6	2.35
chr2L	18271709	18271710	CG42750	1.6	1.9	1.75
chr2L	1836557	1836558	wry	1	100	50.5
chr2L	1837309	1837310	wry	1.3	1.7	1.5
chr2L	1843057	1843058	wry	0.5	0.6	0.55
chr2L	18442209	18442210	RpS26	16.7	25	20.85
chr2L	18442274	18442275	RpS26	2.9	20	11.45
chr2L	1844252	1844253	wry	0.5	1	0.75
chr2L	18442545	18442546	RpS26	1.9	3.6	2.75
chr2L	1844356	1844357	wry	0.6	0.8	0.7
chr2L	18444729	18444730	ncm	8.3	5	6.65
chr2L	18448340	18448341	ncm	6.3	8.3	7.3
chr2L	18450357	18450358	bsf	1.9	3.6	2.75
chr2L	18451204	18451205	bsf	1.7	5.9	3.8
chr2L	18454501	18454502	bsf	2	3.2	2.6
chr2L	18489187	18489188	kon	16.7	11.1	13.9
chr2L	18534526	18534527	Pde11	3.1	3.8	3.45
chr2L	18537455	18537456	Pde11	5.6	5	5.3
chr2L	18540758	18540759	Pde11	4	5.6	4.8
chr2L	1855686	1855687	wry	0.7	0.5	0.6
chr2L	1856537	1856538	wry	0.4	0.7	0.55
chr2L	1856753	1856754	wry	1	0.5	0.75
chr2L	1856979	1856980	wry	0.4	0.4	0.4
chr2L	1857016	1857017	wry	0.4	0.5	0.45
chr2L	1857046	1857047	wry	0.8	0.5	0.65
chr2L	1857056	1857057	wry	0.4	0.5	0.45
chr2L	1857229	1857230	wry	0.3	0.3	0.3
chr2L	1857271	1857272	wry	0.32	0.38	0.35
chr2L	1857423	1857424	wry	0.5	0.7	0.6
chr2L	1857597	1857598	wry	0.4	0.7	0.55
chr2L	1857656	1857657	wry	0.4	0.6	0.5
chr2L	1857752	1857753	wry	0.3	0.5	0.4
chr2L	1858034	1858035	wry	0.6	1	0.8
chr2L	1858891	1858892	CG31663	2.9	1.7	2.3
chr2L	18592673	18592674	CG15160	5.9	5.6	5.75
chr2L	18594232	18594233	CG15160	5.6	6.3	5.95
chr2L	18600397	18600398	CG10413	9.3	11.1	10.2
chr2L	18600635	18600636	CG10413	2.15	4.5	3.33
chr2L	18608264	18608265	CG10333	3	3	3
chr2L	1867242	1867243	CG31663	1.1	1.4	1.25
chr2L	186845	186846	spen	3.9	3	3.45
chr2L	18687514	18687515	msl-1	7.7	7.1	7.4
chr2L	1869120	1869121	CG31663	0.8	1.5	1.15
chr2L	18703598	18703599	CG10343	7.5	8.3	7.9
chr2L	18703915	18703916	CG10343	2.6	9.5	6.05
chr2L	18706169	18706170	Faf	1.7	3.3	2.5
chr2L	18707070	18707071	Faf	1.1	1.6	1.35
chr2L	18707183	18707184	Faf	1	3.2	2.1
chr2L	18707847	18707848	Faf	0.9	1.4	1.15
chr2L	18708480	18708481	Faf	1.2	2.2	1.7
chr2L	187604	187605	spen	3.2	6.7	4.95
chr2L	188224	188225	spen	3.7	3.3	3.5
chr2L	18828277	18828278	CG17322	7.7	8.3	8
chr2L	18837134	18837135	CG10600	3.7	2.6	3.15
chr2L	18839213	18839214	CG10600	10.5	3.8	7.15
chr2L	18845386	18845387	CG17321	1.1	1.9	1.5
chr2L	18845744	18845745	CG17321	1.2	1.2	1.2
chr2L	18853027	18853028	CG17321	1.3	1.3	1.3
chr2L	18853110	18853111	CG17321	1.5	0.7	1.1
chr2L	18853196	18853197	CG17321	1.4	0.9	1.15
chr2L	18853704	18853705	CG17321	1.3	1.7	1.5
chr2L	18853864	18853865	CG17321	0.9	2.6	1.75
chr2L	18854109	18854110	CG17321	1.1	1.3	1.2
chr2L	18854454	18854455	CG17321	0.9	1.9	1.4
chr2L	18854495	18854496	CG17321	3.65	5.35	4.5
chr2L	18854860	18854861	CG17321	1.05	1.93	1.49
chr2L	18854875	18854876	CG17321	2.1	4.2	3.15
chr2L	18854904	18854905	CG17321	0.8	1.6	1.2
chr2L	18916804	18916805	ssp3	6.7	11.1	8.9
chr2L	189338	189339	spen	2.6	5	3.8
chr2L	18951486	18951487	Nedd8	0.9	1.3	1.1
chr2L	18959144	18959145	Nak	4.3	4.3	4.3
chr2L	18961282	18961283	Nak	3	5.3	4.15
chr2L	18962114	18962115	Nak	3.1	5.6	4.35
chr2L	18964944	18964945	Nak	1.4	1.5	1.45
chr2L	189657	189658	spen	3.7	3.7	3.7
chr2L	18973998	18973999	CG10639	1	4.2	2.6
chr2L	18977609	18977610	Swip-1	2.38	9.18	5.78
chr2L	18977757	18977758	CG10431	1.4	1.3	1.35
chr2L	18978088	18978089	Swip-1	0.9	1	0.95
chr2L	18978155	18978156	Swip-1	1.5	4.1	2.8
chr2L	18986807	18986808	Swip-1	1.5	1.7	1.6
chr2L	18987755	18987756	CG15168	1.4	2	1.7
chr2L	18987794	18987795	CG15168	2	1.5	1.75
chr2L	19004328	19004329	CG31793	6.7	11.07	8.88
chr2L	19005659	19005660	CG31793	8.3	6.7	7.5
chr2L	19007343	19007344	CG31793	5.3	5.9	5.6
chr2L	19008367	19008368	RpL30	0.4	0.5	0.45
chr2L	19008898	19008899	RpL30	4.8	8.3	6.55
chr2L	19008915	19008916	RpL30	4.8	6.7	5.75
chr2L	190147	190148	spen	2.1	1.9	2
chr2L	19029672	19029673	Side	6.7	5.3	6
chr2L	19031088	19031089	hk	0.8	0.9	0.85
chr2L	19031229	19031230	hk	4.7	15.9	10.3
chr2L	19031708	19031709	hk	1.8	1.3	1.55
chr2L	19031759	19031760	hk	0.6	0.8	0.7
chr2L	19031866	19031867	hk	0.8	1	0.9
chr2L	19032052	19032053	hk	0.62	0.72	0.67
chr2L	19032259	19032260	hk	0.7	0.8	0.75
chr2L	19032620	19032621	hk	1.2	1.2	1.2
chr2L	19032845	19032846	hk	0.9	1.1	1
chr2L	19032848	19032849	hk	1.2	1.2	1.2
chr2L	19032995	19032996	hk	1.1	1.3	1.2
chr2L	19033272	19033273	hk	0.7	0.9	0.8
chr2L	19033349	19033350	hk	0.6	1.7	1.15
chr2L	19033468	19033469	hk	2.7	2.6	2.65
chr2L	19034085	19034086	CG31800	1.2	1.9	1.55
chr2L	19034244	19034245	CG31800	2	2.9	2.45
chr2L	19038178	19038179	mib2	1.9	2.3	2.1
chr2L	19038294	19038295	mib2	2.4	2.9	2.65
chr2L	19038912	19038913	mib2	2.5	2.4	2.45
chr2L	19039458	19039459	mib2	2	3.4	2.7
chr2L	19042141	19042142	Catsup	3.1	4.2	3.65
chr2L	19045479	19045480	Acn	1.1	2.9	2
chr2L	19046083	19046084	Acn	1.3	0.6	0.95
chr2L	19046275	19046276	Acn	1.6	0.7	1.15
chr2L	19046374	19046375	Acn	0.7	0.6	0.65
chr2L	19047034	19047035	Acn	0.9	0.8	0.85
chr2L	19050036	19050037	l(2)37Bb	1.9	2.5	2.2
chr2L	19050094	19050095	l(2)37Bb	1.7	2.3	2
chr2L	19050330	19050331	l(2)37Bb	1.9	4.2	3.05
chr2L	19050431	19050432	l(2)37Bb	2.6	3	2.8
chr2L	19050456	19050457	l(2)37Bb	2	6.7	4.35
chr2L	19053209	19053210	Rpn3	1.4	2.1	1.75
chr2L	19054841	19054842	CG10492	2.7	6.3	4.5
chr2L	19058180	19058181	CG10492	2	1.8	1.9
chr2L	190653	190654	spen	3.6	2.6	3.1
chr2L	19066369	19066370	CG17343	3.4	3.6	3.5
chr2L	19069643	19069644	CG17343	6.7	10	8.35
chr2L	19083148	19083149	Lim3	11.1	14.3	12.7
chr2L	19114911	19114912	CG10561	3.1	23.43	13.27
chr2L	19115464	19115465	CG10561	2.7	5.3	4
chr2L	19116526	19116527	Ddc	1	0.7	0.85
chr2L	19116676	19116677	Ddc	0.6	0.45	0.52
chr2L	19119520	19119521	Ddc	1.7	1.5	1.6
chr2L	19120257	19120258	Ddc	0.4	0.3	0.35
chr2L	19128310	19128311	l(2)37Cd	11.1	25	18.05
chr2L	19172792	19172793	brat	5.6	7.7	6.65
chr2L	19174347	19174348	brat	1.8	3.1	2.45
chr2L	19175123	19175124	brat	1.5	3.8	2.65
chr2L	19175320	19175321	brat	2.9	3	2.95
chr2L	19175578	19175579	brat	1.6	2.2	1.9
chr2L	19175796	19175797	brat	1.7	2.4	2.05
chr2L	19176241	19176242	brat	2	4.5	3.25
chr2L	19176296	19176297	brat	2.1	3.3	2.7
chr2L	19176572	19176573	brat	1.9	3.8	2.85
chr2L	19177658	19177659	brat	3.1	1.7	2.4
chr2L	19177825	19177826	brat	1.2	1.7	1.45
chr2L	19179395	19179396	brat	1.5	22.6	12.05
chr2L	19179419	19179420	brat	3.4	2.3	2.85
chr2L	19187788	19187789	pigeon	5.3	3.7	4.5
chr2L	19187874	19187875	pigeon	4	4	4
chr2L	19188332	19188333	pigeon	11.5	13.6	12.55
chr2L	191889	191890	spen	2	4.3	3.15
chr2L	19190745	19190746	drl	2.1	15.4	8.75
chr2L	19206983	19206984	drl	4.5	3.8	4.15
chr2L	19207449	19207450	drl	4.3	2.1	3.2
chr2L	19208218	19208219	drl	5	2.1	3.55
chr2L	193037	193038	spen	2.6	2.9	2.75
chr2L	19391027	19391028	CG17544	3.1	2.8	2.95
chr2L	193991	193992	spen	1.7	5.4	3.55
chr2L	194008	194009	spen	1.8	2.5	2.15
chr2L	19404276	19404277	Pax	5.3	3.2	4.25
chr2L	19410335	19410336	Pax	5	6.3	5.65
chr2L	1941310	1941311	CG7337	2.9	4.5	3.7
chr2L	1942148	1942149	CG7337	4.3	6.5	5.4
chr2L	19426216	19426217	CG13085	4.8	10	7.4
chr2L	19426216	19426217	CG16771	4.8	10	7.4
chr2L	19426331	19426332	Pax	4.5	22.7	13.6
chr2L	19430756	19430757	CG9987	2	6.7	4.35
chr2L	19431488	19431489	CG9987	5.3	3.4	4.35
chr2L	19433046	19433047	Rab9	2.9	5	3.95
chr2L	19435117	19435118	Rab9	5.9	5	5.45
chr2L	19447687	19447688	Top2	4	3.4	3.7
chr2L	19448485	19448486	Top2	2	2.7	2.35
chr2L	19449202	19449203	Top2	3.2	2.5	2.85
chr2L	19496338	19496339	swm	3.1	2.4	2.75
chr2L	19497364	19497365	swm	1.15	1.8	1.48
chr2L	19504142	19504143	CG10188	3.2	4.5	3.85
chr2L	19507922	19507923	CG10188	2.9	2.9	2.9
chr2L	19509297	19509298	CG10186	0.98	0.38	0.68
chr2L	19509318	19509319	CG10186	0.45	0.85	0.65
chr2L	19511030	19511031	CG10186	0.1	0.1	0.1
chr2L	19511979	19511980	CG10186	0.15	0.2	0.18
chr2L	19512076	19512077	CG10186	0.2	0.3	0.25
chr2L	19512606	19512607	CG10186	0.2	0.45	0.32
chr2L	19513366	19513367	CG10186	0.2	0.3	0.25
chr2L	19513858	19513859	CG10186	0.3	0.3	0.3
chr2L	19514539	19514540	CG10186	0.3	0.4	0.35
chr2L	19514615	19514616	CG10186	0.25	0.45	0.35
chr2L	19516580	19516581	CG10186	0.1	0.1	0.1
chr2L	19521411	19521412	CG10132	1.7	9.1	5.4
chr2L	19521629	19521630	CG10132	1.4	2.2	1.8
chr2L	19522037	19522038	CG10132	2	2	2
chr2L	19523333	19523334	CG10132	1.5	1.7	1.6
chr2L	19523687	19523688	CG10132	1.5	1.73	1.62
chr2L	19524288	19524289	CG10132	4.9	2.1	3.5
chr2L	19524765	19524766	CG10132	1	1.3	1.15
chr2L	19525841	19525842	CG10166	2	8	5
chr2L	19529152	19529153	CG10165	6.2	4.7	5.45
chr2L	19532930	19532931	CG10137	2.4	4.3	3.35
chr2L	19534387	19534388	CG33116	3.2	3.4	3.3
chr2L	19542531	19542532	ref(2)P	0.9	1.4	1.15
chr2L	19542867	19542868	ref(2)P	0.5	1	0.75
chr2L	19542868	19542869	ref(2)P	2.6	1.4	2
chr2L	19544488	19544489	ref(2)P	0.5	0.7	0.6
chr2L	19545283	19545284	ref(2)P	0.6	1	0.8
chr2L	19545431	19545432	CG10337	0.5	0.8	0.65
chr2L	19545515	19545516	ref(2)P	1.2	4.4	2.8
chr2L	195466	195467	spen	1.6	1.6	1.6
chr2L	195549	195550	spen	1.5	1.6	1.55
chr2L	19568254	19568255	spi	0.6	0.9	0.75
chr2L	19568494	19568495	spi	0.9	0.7	0.8
chr2L	19577187	19577188	spi	0.6	1.6	1.1
chr2L	19577193	19577194	spi	1.5	1	1.25
chr2L	19580823	19580824	Hakai	3.6	4.5	4.05
chr2L	19583536	19583537	CG10262	4	7.7	5.85
chr2L	19584849	19584850	CG10366	14.3	7.7	11
chr2L	19584993	19584994	CG10366	2.3	3.7	3
chr2L	19585479	19585480	CG10366	3.3	4	3.65
chr2L	19585569	19585570	CG10366	3	5	4
chr2L	19585590	19585591	CG10366	2.9	3.8	3.35
chr2L	19585740	19585741	CG10366	2.2	3.8	3
chr2L	19586838	19586839	Lar	2.1	2.1	2.1
chr2L	19610925	19610926	Lar	7.1	2.8	4.95
chr2L	196153	196154	spen	1.6	1.7	1.65
chr2L	19644267	19644268	Lar	1	1.3	1.15
chr2L	196707	196708	spen	1.9	4	2.95
chr2L	19714901	19714902	Lar	1.2	1.7	1.45
chr2L	19714915	19714916	Lar	2.5	1.6	2.05
chr2L	19723493	19723494	Lar	11.1	6.3	8.7
chr2L	19726778	19726779	Lar	0.8	1	0.9
chr2L	19727120	19727121	Lar	0.5	0.9	0.7
chr2L	19727589	19727590	Lar	0.8	0.9	0.85
chr2L	19727856	19727857	Lar	0.8	0.8	0.8
chr2L	19727922	19727923	Lar	0.6	0.9	0.75
chr2L	19728056	19728057	Lar	1.1	0.8	0.95
chr2L	19728112	19728113	Lar	4.7	7.1	5.9
chr2L	19728938	19728939	Lar	1	0.9	0.95
chr2L	19729386	19729387	Lar	2.2	0.82	1.51
chr2L	19729722	19729723	Lar	0.8	1.1	0.95
chr2L	19729797	19729798	Lar	1.4	1.2	1.3
chr2L	19730364	19730365	Lar	0.8	1.2	1
chr2L	19730458	19730459	Lar	0.7	0.8	0.75
chr2L	19730815	19730816	Lar	0.6	0.7	0.65
chr2L	19730847	19730848	Lar	0.8	0.8	0.8
chr2L	19731364	19731365	Lar	0.8	1.1	0.95
chr2L	19731504	19731505	Lar	0.6	0.9	0.75
chr2L	19731566	19731567	Lar	0.5	0.6	0.55
chr2L	19731608	19731609	Lar	1.3	2.62	1.96
chr2L	19731752	19731753	Lar	1	1.3	1.15
chr2L	19731786	19731787	Lar	11.6	12.1	11.85
chr2L	19731896	19731897	Lar	2	1.6	1.8
chr2L	19731924	19731925	Lar	0.7	1.6	1.15
chr2L	19731972	19731973	Lar	1.4	1.4	1.4
chr2L	197348	197349	spen	1.7	1.8	1.75
chr2L	19736947	19736948	Nf-YB	2.9	3.2	3.05
chr2L	19743281	19743282	CG10631	4	13.3	8.65
[truncated: 34,133 more rows]

## Sheet: Del mIDR Brain
chrom	start	end	Gene	Replicate 1 Edit Percentage	Replicate 2 Edit Percentage	Average Edit Percentage
chr2L	10005810	10005811	CG4747	3.2	4.5	3.85
chr2L	10006220	10006221	CG4747	2.7	2.1	2.4
chr2L	10008050	10008051	CG4747	1.8	3.8	2.8
chr2L	10008348	10008349	CG4747	1	1.1	1.05
chr2L	10008617	10008618	CG4747	1.4	0.7	1.05
chr2L	10008743	10008744	CG4747	1.7	1.4	1.55
chr2L	10010871	10010872	Trp1	0.7	0.4	0.55
chr2L	10011850	10011851	Trp1	0.3	0.5	0.4
chr2L	10012400	10012401	Trp1	0.5	0.4	0.45
chr2L	10012578	10012579	Trp1	0.5	0.4	0.45
chr2L	10012868	10012869	Trp1	0.5	0.6	0.55
chr2L	10013057	10013058	Trp1	0.5	0.5	0.5
chr2L	1008394	1008395	IA-2	0.4	0.5	0.45
chr2L	1008403	1008404	IA-2	2.3	1	1.65
chr2L	1008425	1008426	IA-2	0.75	0.52	0.64
chr2L	1008427	1008428	IA-2	1	0.5	0.75
chr2L	1008428	1008429	IA-2	0.4	0.5	0.45
chr2L	1008439	1008440	IA-2	3.77	4.5	4.13
chr2L	1008440	1008441	IA-2	1.9	1.2	1.55
chr2L	1008468	1008469	IA-2	2.3	1.2	1.75
chr2L	1008473	1008474	IA-2	0.4	0.43	0.42
chr2L	1008495	1008496	IA-2	0.1	0.2	0.15
chr2L	1008525	1008526	IA-2	1.98	2.52	2.25
chr2L	1008583	1008584	IA-2	3.8	4.3	4.05
chr2L	1008621	1008622	IA-2	0.2	0.12	0.16
chr2L	1008639	1008640	IA-2	4.4	4.15	4.28
chr2L	1008643	1008644	IA-2	0.2	0.25	0.22
chr2L	1008649	1008650	IA-2	0.5	1.1	0.8
chr2L	1008650	1008651	IA-2	0.3	0.1	0.2
chr2L	1008658	1008659	IA-2	0.1	0.4	0.25
chr2L	1008675	1008676	IA-2	0.2	0.2	0.2
chr2L	1008687	1008688	IA-2	13.7	9.6	11.65
chr2L	1008688	1008689	IA-2	8.3	7.8	8.05
chr2L	1008689	1008690	IA-2	9.2	4.8	7
chr2L	1008690	1008691	IA-2	0.8	0.6	0.7
chr2L	1008691	1008692	IA-2	0.3	0.3	0.3
chr2L	1008692	1008693	IA-2	1.1	0.65	0.88
chr2L	1008695	1008696	IA-2	0.3	0.3	0.3
chr2L	1008700	1008701	IA-2	0.32	0.57	0.44
chr2L	1008705	1008706	IA-2	0.4	0.1	0.25
chr2L	1008706	1008707	IA-2	0.1	0.1	0.1
chr2L	1008715	1008716	IA-2	0.2	0.2	0.2
chr2L	1008723	1008724	IA-2	0.1	0.2	0.15
chr2L	1008730	1008731	IA-2	0.1	0.1	0.1
chr2L	1008735	1008736	IA-2	0.8	0.9	0.85
chr2L	1008737	1008738	IA-2	0.6	0.6	0.6
chr2L	1008745	1008746	IA-2	0.1	0.2	0.15
chr2L	1008752	1008753	IA-2	0.9	0.8	0.85
chr2L	1008754	1008755	IA-2	0.5	0.3	0.4
chr2L	1008759	1008760	IA-2	0.8	0.7	0.75
chr2L	1008766	1008767	IA-2	0.48	0.4	0.44
chr2L	1008773	1008774	IA-2	0.5	0.2	0.35
chr2L	1008791	1008792	IA-2	0.3	0.2	0.25
chr2L	1008792	1008793	IA-2	0.2	0.5	0.35
chr2L	1008819	1008820	IA-2	0.8	1.6	1.2
chr2L	1008826	1008827	IA-2	1.4	2.5	1.95
chr2L	1008914	1008915	IA-2	0.2	0.4	0.3
chr2L	1008928	1008929	IA-2	0.2	0.2	0.2
chr2L	1008961	1008962	IA-2	0.1	0.3	0.2
chr2L	1008982	1008983	IA-2	0.8	1.4	1.1
chr2L	1008993	1008994	IA-2	4.7	3.1	3.9
chr2L	1009009	1009010	IA-2	2.88	0.7	1.79
chr2L	1009080	1009081	IA-2	9.5	11.1	10.3
chr2L	1009081	1009082	IA-2	7	1.6	4.3
chr2L	1009086	1009087	IA-2	1.9	1.4	1.65
chr2L	1009109	1009110	IA-2	3.4	2.6	3
chr2L	1009110	1009111	IA-2	2.6	1.1	1.85
chr2L	1009129	1009130	IA-2	0.5	0.3	0.4
chr2L	1009138	1009139	IA-2	2.45	1.68	2.06
chr2L	1009189	1009190	IA-2	1	1.2	1.1
chr2L	1009209	1009210	IA-2	0.3	0.7	0.5
chr2L	1009220	1009221	IA-2	0.6	0.6	0.6
chr2L	1009223	1009224	IA-2	2.2	0.9	1.55
chr2L	1009230	1009231	IA-2	0.48	0.4	0.44
chr2L	1009244	1009245	IA-2	0.3	0.3	0.3
chr2L	1009366	1009367	IA-2	0.45	0.52	0.48
chr2L	1009382	1009383	IA-2	0.7	0.2	0.45
chr2L	1009414	1009415	IA-2	0.45	0.9	0.68
chr2L	1009424	1009425	IA-2	3.5	0.7	2.1
chr2L	1009440	1009441	IA-2	28.8	20.2	24.5
chr2L	1009444	1009445	IA-2	0.4	0.75	0.57
chr2L	1009454	1009455	IA-2	0.9	0.98	0.94
chr2L	1009463	1009464	IA-2	0.68	0.25	0.46
chr2L	1009538	1009539	IA-2	0.3	0.15	0.22
chr2L	1009585	1009586	IA-2	0.5	0.2	0.35
chr2L	1009605	1009606	IA-2	0.62	0.92	0.77
chr2L	1009618	1009619	IA-2	0.7	0.45	0.57
chr2L	1009682	1009683	IA-2	0.5	0.2	0.35
chr2L	1009687	1009688	IA-2	0.2	0.1	0.15
chr2L	1009690	1009691	IA-2	0.8	0.35	0.57
chr2L	1009732	1009733	IA-2	0.5	1.3	0.9
chr2L	1009783	1009784	IA-2	0.4	0.4	0.4
chr2L	1009788	1009789	IA-2	0.3	0.5	0.4
chr2L	1009818	1009819	IA-2	0.4	0.4	0.4
chr2L	1009833	1009834	IA-2	0.1	0.2	0.15
chr2L	1009834	1009835	IA-2	0.4	0.1	0.25
chr2L	1009839	1009840	IA-2	1	0.8	0.9
chr2L	1009853	1009854	IA-2	0.28	0.22	0.25
chr2L	1009854	1009855	IA-2	0.35	0.25	0.3
chr2L	1009876	1009877	IA-2	0.1	0.1	0.1
chr2L	1009878	1009879	IA-2	0.3	0.22	0.26
chr2L	1009905	1009906	IA-2	0.05	0.05	0.05
chr2L	1009906	1009907	IA-2	0	0.1	0.05
chr2L	1009907	1009908	IA-2	0.2	0.1	0.15
chr2L	1009914	1009915	IA-2	0.1	0.2	0.15
chr2L	1009915	1009916	IA-2	0.3	0.3	0.3
chr2L	1009932	1009933	IA-2	0.3	0.4	0.35
chr2L	1009937	1009938	IA-2	0	0.1	0.05
chr2L	1009955	1009956	IA-2	0.2	0.28	0.24
chr2L	1009973	1009974	IA-2	6.38	3.9	5.14
chr2L	1009974	1009975	IA-2	0.5	0.1	0.3
chr2L	1009989	1009990	IA-2	0.18	0.12	0.15
chr2L	1009994	1009995	IA-2	0.15	0.05	0.1
chr2L	1010005	1010006	IA-2	0.35	0.4	0.38
chr2L	1010011	1010012	IA-2	0.62	0.65	0.64
chr2L	1010018	1010019	IA-2	0.18	0.3	0.24
chr2L	1010033	1010034	IA-2	0.1	0	0.05
chr2L	1010034	1010035	IA-2	0.1	0	0.05
chr2L	1010047	1010048	IA-2	0.3	0.1	0.2
chr2L	1010052	1010053	IA-2	0.3	0.15	0.22
chr2L	1010053	1010054	IA-2	1	0.55	0.78
chr2L	1010054	1010055	IA-2	1.1	0.4	0.75
chr2L	1010058	1010059	IA-2	1.3	0.9	1.1
chr2L	1010060	1010061	IA-2	1.8	0.8	1.3
chr2L	1010062	1010063	IA-2	2.98	2.35	2.66
chr2L	1010070	1010071	IA-2	0.4	0.7	0.55
chr2L	1010072	1010073	IA-2	1.4	0.75	1.07
chr2L	1010074	1010075	IA-2	0.9	0.52	0.71
chr2L	1010094	1010095	IA-2	0.3	0.18	0.24
chr2L	1010096	1010097	IA-2	0.1	0	0.05
chr2L	1010098	1010099	IA-2	0.12	0.18	0.15
chr2L	1010125	1010126	IA-2	0	0.1	0.05
chr2L	1010151	1010152	IA-2	0	0.1	0.05
chr2L	1010358	1010359	IA-2	0.18	0.08	0.13
chr2L	1010383	1010384	IA-2	0.1	0.08	0.09
chr2L	1010384	1010385	IA-2	0.1	0.1	0.1
chr2L	1010395	1010396	IA-2	0	0.1	0.05
chr2L	1010424	1010425	IA-2	0.05	0.1	0.08
chr2L	1010439	1010440	IA-2	0	0	0
chr2L	1010447	1010448	IA-2	0.1	0.1	0.1
chr2L	1010449	1010450	IA-2	0	0.1	0.05
chr2L	1010450	1010451	IA-2	0.08	0.1	0.09
chr2L	1010451	1010452	IA-2	0.1	0.1	0.1
chr2L	1010465	1010466	IA-2	0.08	0.1	0.09
chr2L	1010469	1010470	IA-2	0.1	0.2	0.15
chr2L	1010470	1010471	IA-2	0.08	0.15	0.12
chr2L	1010481	1010482	IA-2	0	0.1	0.05
chr2L	1010498	1010499	IA-2	0.2	0.1	0.15
chr2L	1010504	1010505	IA-2	0.85	0.55	0.7
chr2L	1010515	1010516	IA-2	0.25	0.45	0.35
chr2L	1010516	1010517	IA-2	0.6	0.85	0.72
chr2L	1010531	1010532	IA-2	0.3	0.5	0.4
chr2L	1010582	1010583	IA-2	0.1	0.1	0.1
chr2L	1010583	1010584	IA-2	0.1	0.1	0.1
chr2L	1010585	1010586	IA-2	0.2	0.1	0.15
chr2L	1010609	1010610	IA-2	0.08	0.25	0.16
chr2L	1010640	1010641	IA-2	0.2	0.15	0.18
chr2L	1011154	1011155	IA-2	0.1	0.2	0.15
chr2L	1011162	1011163	IA-2	0.1	0.2	0.15
chr2L	1011315	1011316	IA-2	0	0	0
chr2L	1011344	1011345	IA-2	0.2	0.12	0.16
chr2L	1011346	1011347	IA-2	0.05	0.05	0.05
chr2L	1011352	1011353	IA-2	0.1	0.1	0.1
chr2L	1011355	1011356	IA-2	0.1	0.1	0.1
chr2L	1011372	1011373	IA-2	0	0	0
chr2L	1011379	1011380	IA-2	0	0.1	0.05
chr2L	1011383	1011384	IA-2	0	0	0
chr2L	1011389	1011390	IA-2	0.1	0.25	0.18
chr2L	1011398	1011399	IA-2	0.28	0.22	0.25
chr2L	1011399	1011400	IA-2	0	0.1	0.05
chr2L	1011408	1011409	IA-2	0.1	0.1	0.1
chr2L	1011409	1011410	IA-2	0.1	0.1	0.1
chr2L	1011414	1011415	IA-2	0.2	0	0.1
chr2L	1011417	1011418	IA-2	0.1	0.1	0.1
chr2L	1011421	1011422	IA-2	0.3	0.1	0.2
chr2L	1011427	1011428	IA-2	2.65	2.12	2.38
chr2L	1011443	1011444	IA-2	0.1	0.1	0.1
chr2L	1011449	1011450	IA-2	0.2	0.1	0.15
chr2L	1011471	1011472	IA-2	0.1	0.15	0.12
chr2L	1011479	1011480	IA-2	0.1	0.1	0.1
chr2L	1011480	1011481	IA-2	0	0.1	0.05
chr2L	1011482	1011483	IA-2	25.9	19.5	22.7
chr2L	1011484	1011485	IA-2	0.2	0.2	0.2
chr2L	1011486	1011487	IA-2	1.12	1.08	1.1
chr2L	1011490	1011491	IA-2	0.8	0.7	0.75
chr2L	1011495	1011496	IA-2	0.4	0.5	0.45
chr2L	1011502	1011503	IA-2	0.3	0	0.15
chr2L	1011505	1011506	IA-2	0.2	0.2	0.2
chr2L	1011511	1011512	IA-2	1.25	1.18	1.21
chr2L	1011515	1011516	IA-2	0.2	0.2	0.2
chr2L	1011516	1011517	IA-2	0.1	0.1	0.1
chr2L	1011517	1011518	IA-2	0.4	0.5	0.45
chr2L	1011535	1011536	IA-2	0.15	0.15	0.15
chr2L	1011542	1011543	IA-2	2.62	2.35	2.49
chr2L	1011544	1011545	IA-2	2.2	1	1.6
chr2L	1011546	1011547	IA-2	1.12	1.02	1.07
chr2L	1011548	1011549	IA-2	1	0.5	0.75
chr2L	1011550	1011551	IA-2	1.9	1.9	1.9
chr2L	1011556	1011557	IA-2	0.1	0.4	0.25
chr2L	1011559	1011560	IA-2	0.25	0.18	0.22
chr2L	1011580	1011581	IA-2	0.3	0.2	0.25
chr2L	1011581	1011582	IA-2	0.2	0.1	0.15
chr2L	1011588	1011589	IA-2	0.1	0.2	0.15
chr2L	1011594	1011595	IA-2	0.1	0.2	0.15
chr2L	1011596	1011597	IA-2	0	0.1	0.05
chr2L	1011600	1011601	IA-2	0.1	0.02	0.06
chr2L	1011602	1011603	IA-2	0	0	0
chr2L	1011604	1011605	IA-2	0.1	0.1	0.1
chr2L	1011611	1011612	IA-2	0.1	0.05	0.08
chr2L	1011615	1011616	IA-2	0	0.02	0.01
chr2L	1011616	1011617	IA-2	0.1	0.02	0.06
chr2L	1011617	1011618	IA-2	0.02	0.02	0.02
chr2L	1011619	1011620	IA-2	0.1	0.2	0.15
chr2L	1011623	1011624	IA-2	0.4	0.3	0.35
chr2L	1011631	1011632	IA-2	0.32	0.3	0.31
chr2L	1011636	1011637	IA-2	0.1	0.1	0.1
chr2L	1011637	1011638	IA-2	3.52	2.4	2.96
chr2L	1011656	1011657	IA-2	0.2	0.2	0.2
chr2L	1011657	1011658	IA-2	0.1	0.1	0.1
chr2L	1011664	1011665	IA-2	0	0.05	0.02
chr2L	1011668	1011669	IA-2	0.2	0.1	0.15
chr2L	1011669	1011670	IA-2	0.2	0.15	0.18
chr2L	1011675	1011676	IA-2	0.1	0	0.05
chr2L	1011682	1011683	IA-2	0.1	0.1	0.1
chr2L	1011683	1011684	IA-2	0	0.08	0.04
chr2L	1011685	1011686	IA-2	0	0	0
chr2L	1011688	1011689	IA-2	0	0	0
chr2L	1011695	1011696	IA-2	0	0	0
chr2L	1011699	1011700	IA-2	0	0	0
chr2L	1011705	1011706	IA-2	1	0.9	0.95
chr2L	1011709	1011710	IA-2	0.3	0.3	0.3
chr2L	1011711	1011712	IA-2	0.2	0.1	0.15
chr2L	1011727	1011728	IA-2	0.15	0.2	0.18
chr2L	1011728	1011729	IA-2	0.1	0.05	0.08
chr2L	1011729	1011730	IA-2	1.88	1.32	1.6
chr2L	1011731	1011732	IA-2	0.92	0.57	0.74
chr2L	1011738	1011739	IA-2	0.12	0.1	0.11
chr2L	1011743	1011744	IA-2	0.57	0.6	0.58
chr2L	1011745	1011746	IA-2	0.3	0.3	0.3
chr2L	1011753	1011754	IA-2	1.05	0.9	0.98
chr2L	1011757	1011758	IA-2	0.1	0.1	0.1
chr2L	1011758	1011759	IA-2	0.3	0.2	0.25
chr2L	1011767	1011768	IA-2	0.2	0.2	0.2
chr2L	1011774	1011775	IA-2	0.6	0.4	0.5
chr2L	1011779	1011780	IA-2	4.4	3.4	3.9
chr2L	1011780	1011781	IA-2	2.2	1.6	1.9
chr2L	1011782	1011783	IA-2	0.1	0.1	0.1
chr2L	1011783	1011784	IA-2	0.2	0.1	0.15
chr2L	1011784	1011785	IA-2	0.72	0.45	0.58
chr2L	1011788	1011789	IA-2	0.1	0.1	0.1
chr2L	1011796	1011797	IA-2	0	0	0
chr2L	1011806	1011807	IA-2	0.1	0.02	0.06
chr2L	1011807	1011808	IA-2	0.1	0.1	0.1
chr2L	1011812	1011813	IA-2	0.15	0.15	0.15
chr2L	1011813	1011814	IA-2	0.3	0.2	0.25
chr2L	1011827	1011828	IA-2	0.5	0.6	0.55
chr2L	1011828	1011829	IA-2	0.1	0.2	0.15
chr2L	1011830	1011831	IA-2	1.75	1.65	1.7
chr2L	1011833	1011834	IA-2	0.08	0.1	0.09
chr2L	1011840	1011841	IA-2	0.35	0.3	0.32
chr2L	1011842	1011843	IA-2	0	0	0
chr2L	1011845	1011846	IA-2	0.1	0.1	0.1
chr2L	1011848	1011849	IA-2	0.2	0.2	0.2
chr2L	1011852	1011853	IA-2	0.3	0.2	0.25
chr2L	1011853	1011854	IA-2	0.1	0.1	0.1
chr2L	1011868	1011869	IA-2	0.02	0.1	0.06
chr2L	1011873	1011874	IA-2	1.3	1.3	1.3
chr2L	1011876	1011877	IA-2	0.1	0.1	0.1
chr2L	1011887	1011888	IA-2	0	0.1	0.05
chr2L	1011896	1011897	IA-2	0	0	0
chr2L	1011900	1011901	IA-2	0.35	0.3	0.32
chr2L	1011903	1011904	IA-2	0.1	0.1	0.1
chr2L	1011907	1011908	IA-2	0	0	0
chr2L	1011909	1011910	IA-2	0.1	0.1	0.1
chr2L	1011910	1011911	IA-2	0.2	0.1	0.15
chr2L	1011917	1011918	IA-2	0.2	0.12	0.16
chr2L	1011979	1011980	IA-2	0.12	0.1	0.11
chr2L	1011980	1011981	IA-2	0.08	0	0.04
chr2L	1011982	1011983	IA-2	0	0.1	0.05
chr2L	1011996	1011997	IA-2	0.2	0.2	0.2
chr2L	1011999	1012000	IA-2	0.05	0.1	0.08
chr2L	1012018	1012019	IA-2	0.43	0.45	0.44
chr2L	1012022	1012023	IA-2	0.1	0.18	0.14
chr2L	1012024	1012025	IA-2	0.52	0.38	0.45
chr2L	1012030	1012031	IA-2	0.22	0.3	0.26
chr2L	1012048	1012049	IA-2	0.2	0.15	0.18
chr2L	1012062	1012063	IA-2	0.02	0.02	0.02
chr2L	1012071	1012072	IA-2	0.05	0.05	0.05
chr2L	1012080	1012081	IA-2	0.02	0	0.01
chr2L	1012109	1012110	IA-2	3.15	2.8	2.97
chr2L	1012116	1012117	IA-2	0.2	0.2	0.2
chr2L	1012127	1012128	IA-2	0	0.1	0.05
chr2L	1012128	1012129	IA-2	0	0	0
chr2L	1012130	1012131	IA-2	0	0	0
chr2L	1012134	1012135	IA-2	0.3	0.2	0.25
chr2L	1012143	1012144	IA-2	0.2	0.1	0.15
chr2L	1012146	1012147	IA-2	0.1	0.1	0.1
chr2L	1012147	1012148	IA-2	0.1	0.1	0.1
chr2L	1012149	1012150	IA-2	0.1	0.12	0.11
chr2L	1012153	1012154	IA-2	0	0	0
chr2L	1012154	1012155	IA-2	0	0	0
chr2L	1012155	1012156	IA-2	0.1	0	0.05
chr2L	1012156	1012157	IA-2	0	0.08	0.04
chr2L	1012158	1012159	IA-2	0.25	0.2	0.22
chr2L	1012166	1012167	IA-2	0	0	0
chr2L	1012167	1012168	IA-2	0.1	0.1	0.1
chr2L	1012179	1012180	IA-2	0.1	0.1	0.1
chr2L	1012181	1012182	IA-2	0.1	0.1	0.1
chr2L	1012184	1012185	IA-2	0.82	0.62	0.72
chr2L	1012186	1012187	IA-2	0.1	0	0.05
chr2L	1012189	1012190	IA-2	0.15	0.1	0.12
chr2L	1012192	1012193	IA-2	0.2	0.2	0.2
chr2L	1012195	1012196	IA-2	0.68	0.7	0.69
chr2L	1012198	1012199	IA-2	0.1	0.18	0.14
chr2L	1012203	1012204	IA-2	0.1	0.1	0.1
chr2L	1012206	1012207	IA-2	0.1	0.02	0.06
chr2L	1012207	1012208	IA-2	0.1	0.08	0.09
chr2L	1012213	1012214	IA-2	7.9	6.4	7.15
chr2L	1012218	1012219	IA-2	2.5	2.2	2.35
chr2L	1012222	1012223	IA-2	0.1	0.1	0.1
chr2L	1012225	1012226	IA-2	0.1	0.1	0.1
chr2L	1012226	1012227	IA-2	0.02	0.1	0.06
chr2L	1012227	1012228	IA-2	0.1	0	0.05
chr2L	1012228	1012229	IA-2	0.1	0.1	0.1
chr2L	1012232	1012233	IA-2	0.3	0.1	0.2
chr2L	1012234	1012235	IA-2	0.1	0.1	0.1
chr2L	1012237	1012238	IA-2	0.3	0.3	0.3
chr2L	1012238	1012239	IA-2	1.18	0.9	1.04
chr2L	1012242	1012243	IA-2	0.38	0.38	0.38
chr2L	1012243	1012244	IA-2	0	0.1	0.05
chr2L	1012248	1012249	IA-2	0.4	0.5	0.45
chr2L	1012251	1012252	IA-2	0.35	0.25	0.3
chr2L	1012255	1012256	IA-2	5.6	4.1	4.85
chr2L	1012261	1012262	IA-2	0.1	0.1	0.1
chr2L	1012263	1012264	IA-2	0	0	0
chr2L	1012264	1012265	IA-2	0	0	0
chr2L	1012268	1012269	IA-2	0.2	0.2	0.2
chr2L	1012270	1012271	IA-2	0.2	0.1	0.15
chr2L	1012273	1012274	IA-2	0.1	0.1	0.1
chr2L	1012275	1012276	IA-2	0	0	0
chr2L	1012276	1012277	IA-2	0	0	0
chr2L	1012278	1012279	IA-2	0	0	0
chr2L	1012279	1012280	IA-2	0	0	0
chr2L	1012280	1012281	IA-2	0	0	0
chr2L	1012282	1012283	IA-2	0	0	0
chr2L	1012283	1012284	IA-2	0	0	0
chr2L	1012284	1012285	IA-2	0	0	0
chr2L	1012287	1012288	IA-2	0	0.1	0.05
chr2L	1012290	1012291	IA-2	0	0.1	0.05
chr2L	1012291	1012292	IA-2	0	0	0
chr2L	1012292	1012293	IA-2	0.08	0	0.04
chr2L	1012294	1012295	IA-2	0	0.1	0.05
chr2L	1012295	1012296	IA-2	0	0	0
chr2L	1012297	1012298	IA-2	0.18	0.18	0.18
chr2L	1012298	1012299	IA-2	0.1	0	0.05
chr2L	1012299	1012300	IA-2	0.1	0.1	0.1
chr2L	1012301	1012302	IA-2	0	0	0
chr2L	1012302	1012303	IA-2	0	0	0
chr2L	1012303	1012304	IA-2	0.1	0	0.05
chr2L	1012304	1012305	IA-2	0	0	0
chr2L	1012306	1012307	IA-2	0	0.1	0.05
chr2L	1012307	1012308	IA-2	0	0	0
chr2L	1012308	1012309	IA-2	0	0	0
chr2L	1012309	1012310	IA-2	0	0	0
chr2L	1012311	1012312	IA-2	0	0	0
chr2L	1012404	1012405	IA-2	0.1	0.1	0.1
chr2L	1012572	1012573	IA-2	0	0	0
chr2L	1012574	1012575	IA-2	0	0	0
chr2L	1012580	1012581	IA-2	0	0	0
chr2L	1012586	1012587	IA-2	0	0	0
chr2L	1012591	1012592	IA-2	0.1	0.02	0.06
chr2L	1012592	1012593	IA-2	0.28	0.2	0.24
chr2L	1012609	1012610	IA-2	0.15	0.1	0.12
chr2L	1012617	1012618	IA-2	0.02	0.02	0.02
chr2L	1012624	1012625	IA-2	0.5	0.4	0.45
chr2L	1012634	1012635	IA-2	1.58	1.88	1.73
chr2L	1012635	1012636	IA-2	0.08	0	0.04
chr2L	1012638	1012639	IA-2	0.08	0	0.04
chr2L	1012641	1012642	IA-2	0.1	0	0.05
chr2L	1012649	1012650	IA-2	0	0	0
chr2L	1012651	1012652	IA-2	0.15	0	0.08
chr2L	1012652	1012653	IA-2	0.1	0	0.05
chr2L	1012654	1012655	IA-2	2.35	1.58	1.97
chr2L	1012659	1012660	IA-2	0	1	0.5
chr2L	1012664	1012665	IA-2	0.22	0	0.11
chr2L	1012667	1012668	IA-2	0	0	0
chr2L	1012668	1012669	IA-2	0	0	0
chr2L	1012669	1012670	IA-2	0	0	0
chr2L	1012670	1012671	IA-2	0	0	0
chr2L	1012671	1012672	IA-2	0	0	0
chr2L	1012673	1012674	IA-2	0.1	0.3	0.2
chr2L	1012681	1012682	IA-2	0.3	0.1	0.2
chr2L	1012684	1012685	IA-2	0.08	0.1	0.09
chr2L	1012689	1012690	IA-2	0.28	0.22	0.25
chr2L	1012695	1012696	IA-2	0.2	0.3	0.25
chr2L	1012698	1012699	IA-2	0.4	0.25	0.32
chr2L	1012709	1012710	IA-2	0.1	0.1	0.1
chr2L	1012715	1012716	IA-2	0.1	0.02	0.06
chr2L	1012849	1012850	IA-2	0.3	0.2	0.25
chr2L	1012853	1012854	IA-2	0.1	0.1	0.1
chr2L	1012854	1012855	IA-2	0	0	0
chr2L	1012858	1012859	IA-2	0.1	0.1	0.1
chr2L	1012861	1012862	IA-2	0.1	0.02	0.06
chr2L	1012871	1012872	IA-2	0.2	0.3	0.25
chr2L	1012877	1012878	IA-2	0.1	0	0.05
chr2L	1012879	1012880	IA-2	0.05	0.05	0.05
chr2L	1012886	1012887	IA-2	0.1	0.1	0.1
chr2L	1012895	1012896	IA-2	0.1	0.1	0.1
chr2L	1012927	1012928	IA-2	0.5	0.48	0.49
chr2L	1013013	1013014	IA-2	0.18	0.12	0.15
chr2L	1013070	1013071	IA-2	0	0.05	0.02
chr2L	1013072	1013073	IA-2	0	0.1	0.05
chr2L	1013089	1013090	IA-2	0.3	0.1	0.2
chr2L	1013094	1013095	IA-2	0.1	0.05	0.08
chr2L	1013108	1013109	IA-2	0.43	0.25	0.34
chr2L	1013118	1013119	IA-2	0.1	0.1	0.1
chr2L	1013123	1013124	IA-2	0.08	0.1	0.09
chr2L	1013124	1013125	IA-2	0.95	0.57	0.76
chr2L	1013139	1013140	IA-2	0	0.1	0.05
chr2L	1013457	1013458	IA-2	0.35	0.22	0.28
chr2L	1013469	1013470	IA-2	0.1	0.25	0.18
chr2L	1013505	1013506	IA-2	0.1	0	0.05
chr2L	1013513	1013514	IA-2	3.8	5.6	4.7
chr2L	1013552	1013553	IA-2	0.1	0.1	0.1
chr2L	1013575	1013576	IA-2	0.1	0.1	0.1
chr2L	1013582	1013583	IA-2	0.2	0.1	0.15
chr2L	1013584	1013585	IA-2	0.18	0.05	0.12
chr2L	1013588	1013589	IA-2	0.1	0	0.05
chr2L	1013590	1013591	IA-2	0.3	0.1	0.2
chr2L	1013764	1013765	IA-2	0.08	0.18	0.13
chr2L	1014711	1014712	IA-2	1.35	0.7	1.02
chr2L	1015251	1015252	IA-2	0.2	0.3	0.25
chr2L	10199931	10199932	Ripalpha	1.8	1.7	1.75
chr2L	10200194	10200195	Ripalpha	8.3	2.3	5.3
chr2L	10201434	10201435	RpL7	0.18	0.12	0.15
chr2L	10202124	10202125	RpL7	0.1	0.2	0.15
chr2L	10202150	10202151	RpL7	0.3	0.3	0.3
chr2L	10202788	10202789	CG34159	2.7	3.4	3.05
chr2L	10202843	10202844	CG34159	0.8	1.9	1.35
chr2L	10202886	10202887	CG34159	0.5	0.5	0.5
chr2L	10202911	10202912	CG34159	1.3	0.6	0.95
chr2L	10204958	10204959	CG5734	2.6	1.9	2.25
chr2L	10205122	10205123	CG5734	1.1	1	1.05
chr2L	10205163	10205164	CG5734	2.5	1.5	2
chr2L	10210337	10210338	CG5727	2.4	2.2	2.3
chr2L	10214266	10214267	Npc1a	0.6	0.7	0.65
chr2L	10214598	10214599	Npc1a	0.8	0.8	0.8
chr2L	10214960	10214961	Npc1a	1	1	1
chr2L	10215251	10215252	Npc1a	1.1	0.8	0.95
chr2L	10222350	10222351	Prosalpha6	0.7	0.6	0.65
chr2L	10224649	10224650	CG5708	0.9	1.2	1.05
chr2L	10225031	10225032	CG5708	0.5	0.7	0.6
chr2L	10225079	10225080	CG5708	0.8	0.75	0.78
chr2L	10225279	10225280	CG5708	4.03	2.8	3.42
chr2L	10225797	10225798	CG5708	1	0.9	0.95
chr2L	10229483	10229484	CG5694	16.7	7.1	11.9
chr2L	10232606	10232607	eEF1delta	0.2	0.1	0.15
chr2L	10233531	10233532	eEF1delta	0.4	0.3	0.35
chr2L	10233827	10233828	eEF1delta	0.6	0.2	0.4
chr2L	10234044	10234045	eEF1delta	0.3	0.2	0.25
chr2L	10234102	10234103	eEF1delta	0.4	0.2	0.3
chr2L	10234242	10234243	eEF1delta	0.2	0.2	0.2
chr2L	10234282	10234283	eEF1delta	0.2	0.2	0.2
chr2L	10242084	10242085	me31B	0.5	0.5	0.5
chr2L	10243374	10243375	chico	2.4	1.4	1.9
chr2L	10244278	10244279	chico	11.1	7.4	9.25
chr2L	10247582	10247583	bsk	0.3	0.4	0.35
chr2L	10248218	10248219	bsk	4.55	1.02	2.79
chr2L	10248849	10248850	bsk	1.75	0.6	1.18
chr2L	10249105	10249106	bsk	4	4.5	4.25
chr2L	10249206	10249207	bsk	0.8	0.8	0.8
chr2L	10250352	10250353	bsk	12.5	7.1	9.8
chr2L	10250439	10250440	bsk	1.2	1	1.1
chr2L	10254006	10254007	Ror	2.9	17.1	10
chr2L	10254103	10254104	Ror	5	3.6	4.3
chr2L	10254522	10254523	Ror	1.7	2	1.85
chr2L	10254805	10254806	CG5676	0.4	0.2	0.3
chr2L	10254806	10254807	CG5676	0.2	0.2	0.2
chr2L	10254829	10254830	CG5676	0.6	0.3	0.45
chr2L	10254948	10254949	CG5676	0.1	0.1	0.1
chr2L	10255094	10255095	CG5676	0.3	0.2	0.25
chr2L	10255132	10255133	CG5676	0.2	0.2	0.2
chr2L	10255258	10255259	CG5676	0.2	0.2	0.2
chr2L	10258802	10258803	Pten	2.7	4.1	3.4
chr2L	10262238	10262239	Rsf1	1	0.6	0.8
chr2L	10262504	10262505	Rsf1	0.2	0.5	0.35
chr2L	10262552	10262553	Rsf1	0.3	0.78	0.54
chr2L	10262592	10262593	Rsf1	0.4	0.4	0.4
chr2L	10262652	10262653	Rsf1	0.5	0.5	0.5
chr2L	10262952	10262953	Rsf1	0.7	1.1	0.9
chr2L	10264246	10264247	CG18619	0.4	0.3	0.35
chr2L	10264802	10264803	CG18619	0.3	0.2	0.25
chr2L	10265028	10265029	CG18619	0.8	0.6	0.7
chr2L	10265558	10265559	Mob3	1.3	1.1	1.2
chr2L	10265689	10265690	Mob3	1.4	1.4	1.4
chr2L	10266070	10266071	Mob3	0.9	1	0.95
chr2L	10269790	10269791	CG4957	1.5	1.6	1.55
chr2L	10271139	10271140	Mulk	3.1	2.7	2.9
chr2L	10272535	10272536	Utx	2.9	7.7	5.3
chr2L	10272861	10272862	Utx	1.7	1.6	1.65
chr2L	10282066	10282067	CG5604	0.2	0.4	0.3
chr2L	10282069	10282070	CG5604	0.2	0.4	0.3
chr2L	10282100	10282101	CG5604	0.5	0.4	0.45
chr2L	10282179	10282180	CG5604	0.8	0.5	0.65
chr2L	10282663	10282664	CG5604	0.4	0.5	0.45
chr2L	10296681	10296682	CYLD	1.3	2.4	1.85
chr2L	10297874	10297875	CR44968	3.8	2.8	3.3
chr2L	10302662	10302663	nmd	1.4	1.5	1.45
chr2L	10303837	10303838	nmd	0.8	0.6	0.7
chr2L	10304229	10304230	CG5390	1	0.4	0.7
chr2L	10304315	10304316	CG5390	0.3	0.7	0.5
chr2L	10304341	10304342	CG5390	0.4	0.6	0.5
chr2L	10304687	10304688	CG5390	0.7	0.6	0.65
chr2L	10305339	10305340	CG5390	1.2	0.8	1
chr2L	10305491	10305492	CG5390	0.9	0.6	0.75
chr2L	10307391	10307392	CG4968	1.1	1.8	1.45
chr2L	10308362	10308363	Cdk5alpha	0.2	0.8	0.5
chr2L	10308431	10308432	Cdk5alpha	0.2	0.6	0.4
chr2L	10308561	10308562	Cdk5alpha	0.25	0.45	0.35
chr2L	10308606	10308607	Cdk5alpha	0.3	0.3	0.3
chr2L	10308634	10308635	Cdk5alpha	0.4	0.3	0.35
chr2L	10311184	10311185	l(2)SH0834	1.8	5	3.4
chr2L	10311445	10311446	l(2)SH0834	1.3	1.2	1.25
chr2L	10311682	10311683	l(2)SH0834	0.8	0.7	0.75
chr2L	10311929	10311930	l(2)SH0834	1.5	1.2	1.35
chr2L	10312411	10312412	CG5384	0.7	0.6	0.65
chr2L	10312423	10312424	CG5384	0.7	0.6	0.65
chr2L	10316575	10316576	CG4972	1.4	1.4	1.4
chr2L	10316738	10316739	CG4972	1.9	0.9	1.4
chr2L	10316794	10316795	CG4972	1	0.7	0.85
chr2L	10317144	10317145	CG4972	1.3	0.6	0.95
chr2L	10317295	10317296	CG4972	2.2	5.7	3.95
chr2L	10317894	10317895	CG5381	2.9	2.2	2.55
chr2L	10328242	10328243	CG5375	2	1.1	1.55
chr2L	10328388	10328389	CG5375	0.7	0.9	0.8
chr2L	10328495	10328496	CG5375	0.7	0.8	0.75
chr2L	10328559	10328560	CG5375	1.2	0.5	0.85
chr2L	10328631	10328632	CG5375	0.7	0.6	0.65
chr2L	10329475	10329476	CG5375	8.3	3	5.65
chr2L	10329824	10329825	CG5375	2.1	1.6	1.85
chr2L	10331846	10331847	CG5037	1	0.9	0.95
chr2L	10332119	10332120	CG5037	0.9	1.1	1
chr2L	10332199	10332200	CG5037	8.8	1.1	4.95
chr2L	10332461	10332462	CG5037	1.5	2.7	2.1
chr2L	10332516	10332517	CG5037	1	1	1
chr2L	10332668	10332669	CG5037	0.8	0.9	0.85
chr2L	10332920	10332921	CG5037	2.7	0.8	1.75
chr2L	10337382	10337383	GATAd	2.6	3.4	3
chr2L	10337405	10337406	GATAd	2.9	1.8	2.35
chr2L	10340557	10340558	SamDC	1.3	1.5	1.4
chr2L	10340747	10340748	SamDC	7	2.5	4.75
chr2L	10341260	10341261	SamDC	0.8	0.8	0.8
chr2L	10341730	10341731	CG31715	0.5	0.3	0.4
chr2L	10342352	10342353	CG31715	0.5	0.4	0.45
chr2L	10342382	10342383	CG31715	0.6	0.6	0.6
chr2L	10343262	10343263	Sps2	3.5	1.3	2.4
chr2L	10343743	10343744	Sps2	1.2	1.2	1.2
chr2L	10347089	10347090	CG5022	5.6	6.3	5.95
chr2L	10347594	10347595	CG5022	6.5	3.2	4.85
chr2L	103546	103547	CG11377	1.4	1.2	1.3
chr2L	10357410	10357411	CG5045	1.1	1	1.05
chr2L	10357906	10357907	CG5045	1	1	1
chr2L	10358760	10358761	Cand1	2.1	2.1	2.1
chr2L	10367701	10367702	CG5056	2.1	2.1	2.1
chr2L	10368301	10368302	rho-5	0.9	1	0.95
chr2L	10368626	10368627	rho-5	1	1.1	1.05
chr2L	10368670	10368671	rho-5	1.4	1.3	1.35
chr2L	10368703	10368704	rho-5	2.3	1.92	2.11
chr2L	10369122	10369123	rho-5	2.1	1.5	1.8
chr2L	10374569	10374570	CG33303	5.9	4.4	5.15
chr2L	10374628	10374629	CG33303	1	0.8	0.9
chr2L	10375183	10375184	CG33303	2.2	1.5	1.85
chr2L	10378523	10378524	dpr19	1.3	1.6	1.45
chr2L	10378526	10378527	dpr19	1.3	1.7	1.5
chr2L	10378662	10378663	dpr19	1.65	1.8	1.73
chr2L	10379129	10379130	dpr19	1.73	1.1	1.42
chr2L	10379510	10379511	dpr19	0.7	0.9	0.8
chr2L	10379555	10379556	dpr19	0.7	0.9	0.8
chr2L	10379673	10379674	dpr19	0.8	1	0.9
chr2L	10379695	10379696	dpr19	0.7	1.2	0.95
chr2L	10379773	10379774	dpr19	0.9	0.9	0.9
chr2L	10379845	10379846	dpr19	13.5	6.6	10.05
chr2L	10386902	10386903	mRpS7	1	0.9	0.95
chr2L	10387020	10387021	mRpS7	0.8	0.6	0.7
chr2L	10387072	10387073	mRpS7	0.7	0.7	0.7
chr2L	10387088	10387089	mRpS7	1.4	0.6	1
chr2L	10387165	10387166	mRpS7	2.9	0.8	1.85
chr2L	10387328	10387329	mRpS7	0.5	0.5	0.5
chr2L	10392487	10392488	da	0.9	0.8	0.85
chr2L	10393005	10393006	da	1.6	1.3	1.45
chr2L	10394508	10394509	Mdh1	0.2	0.2	0.2
chr2L	10401850	10401851	Cnot4	0.4	0.7	0.55
chr2L	10402303	10402304	Cnot4	0.5	1.5	1
chr2L	10402723	10402724	Cnot4	0.4	0.5	0.45
chr2L	10402901	10402902	Cnot4	2.4	2.2	2.3
chr2L	10402910	10402911	Cnot4	5.73	5.62	5.68
chr2L	10402930	10402931	Cnot4	1.1	1.2	1.15
chr2L	10402931	10402932	Cnot4	2.6	2.6	2.6
chr2L	10403309	10403310	CG17768	1.8	0.7	1.25
chr2L	10403309	10403310	LSm-4	1.8	0.7	1.25
chr2L	10403443	10403444	CG17768	0.4	0.5	0.45
chr2L	10403443	10403444	LSm-4	0.4	0.5	0.45
chr2L	10408367	10408368	Ip259	8.3	13.3	10.8
chr2L	10408367	10408368	RpS27A	8.3	13.3	10.8
chr2L	10408383	10408384	Ip259	0.1	0.1	0.1
chr2L	10408383	10408384	RpS27A	0.1	0.1	0.1
chr2L	10408752	10408753	Ip259	0.8	0.2	0.5
chr2L	10408752	10408753	RpS27A	0.8	0.2	0.5
chr2L	10408779	10408780	Ip259	0.1	0.1	0.1
chr2L	10408779	10408780	RpS27A	0.1	0.1	0.1
chr2L	10408916	10408917	Ip259	0.3	0.3	0.3
chr2L	10408916	10408917	RpS27A	0.3	0.3	0.3
chr2L	10408919	10408920	Ip259	1.5	1.05	1.27
chr2L	10408919	10408920	RpS27A	1.5	1.05	1.27
chr2L	10408920	10408921	Ip259	4.15	3.18	3.66
chr2L	10408920	10408921	RpS27A	4.15	3.18	3.66
chr2L	10408949	10408950	Ip259	0.1	0.1	0.1
chr2L	10408949	10408950	RpS27A	0.1	0.1	0.1
chr2L	10409073	10409074	Ip259	0	0	0
chr2L	10409073	10409074	RpS27A	0	0	0
chr2L	10409171	10409172	Ip259	0.1	0.1	0.1
chr2L	10409171	10409172	RpS27A	0.1	0.1	0.1
chr2L	10409467	10409468	Ip259	0.1	0.1	0.1
chr2L	10409467	10409468	RpS27A	0.1	0.1	0.1
chr2L	10409544	10409545	Ip259	0.2	0.1	0.15
chr2L	10409544	10409545	RpS27A	0.2	0.1	0.15
chr2L	10409571	10409572	Ip259	1.5	0.9	1.2
chr2L	10409571	10409572	RpS27A	1.5	0.9	1.2
chr2L	10409574	10409575	Ip259	0.3	0.3	0.3
chr2L	10409574	10409575	RpS27A	0.3	0.3	0.3
chr2L	10410451	10410452	RpS27A	0.1	0.1	0.1
chr2L	10410650	10410651	CG5355	2.7	1.3	2
chr2L	10424571	10424572	CG5168	0.7	1.2	0.95
chr2L	10425203	10425204	CG5168	0.6	0.7	0.65
chr2L	10425571	10425572	SmB	0.8	1.2	1
chr2L	10425958	10425959	SmB	0.9	0.9	0.9
chr2L	10426020	10426021	SmB	1.3	1.3	1.3
chr2L	10427696	10427697	KdelR	1.5	0.6	1.05
chr2L	10427900	10427901	KdelR	0.8	0.6	0.7
chr2L	10428005	10428006	KdelR	1.2	1	1.1
chr2L	10428146	10428147	KdelR	1.7	1.5	1.6
chr2L	10428408	10428409	KdelR	1	1.3	1.15
chr2L	10430227	10430228	CG5343	2	2.1	2.05
chr2L	1043154	1043155	IA-2	1	2.43	1.72
chr2L	10431870	10431871	TfIIB	2.6	2.6	2.6
chr2L	10432373	10432374	TfIIB	1.8	1.5	1.65
chr2L	10432783	10432784	CG5337	0.8	0.5	0.65
chr2L	10432798	10432799	CG5337	0.5	0.5	0.5
chr2L	10432825	10432826	CG5337	0.8	1.1	0.95
chr2L	10432833	10432834	CG5337	1	0.6	0.8
chr2L	10433155	10433156	CG5337	3.2	2.4	2.8
chr2L	10433176	10433177	CG5337	1.2	0.8	1
chr2L	10433177	10433178	CG5337	1	1.2	1.1
chr2L	10433182	10433183	CG5337	0.8	1.1	0.95
chr2L	10433191	10433192	CG5337	1	2.1	1.55
chr2L	10433279	10433280	CG5337	0.7	1.2	0.95
chr2L	10433917	10433918	CG5337	0.8	0.7	0.75
chr2L	10434154	10434155	CG5337	1	1.2	1.1
chr2L	10434615	10434616	CG5337	2.2	3.2	2.7
chr2L	10436	10437	l(2)gl	4.3	2.7	3.5
chr2L	10438652	10438653	CHIP	0.8	0.5	0.65
chr2L	10453015	10453016	CG5322	3.8	3.8	3.8
chr2L	10458553	10458554	LM408	4	2.4	3.2
chr2L	10459013	10459014	LM408	2.75	1.4	2.08
chr2L	10459223	10459224	LM408	1.5	1.1	1.3
chr2L	10460908	10460909	LM408	0.7	0.7	0.7
chr2L	10461350	10461351	LM408	0.3	0.7	0.5
chr2L	10461460	10461461	LM408	0.3	0.4	0.35
chr2L	10461679	10461680	LM408	0.2	0.2	0.2
chr2L	10461691	10461692	LM408	0.4	0.2	0.3
chr2L	10461705	10461706	LM408	0.2	0.2	0.2
chr2L	10462380	10462381	LM408	0.7	0.3	0.5
chr2L	10481417	10481418	RluA-2	8.3	6.7	7.5
chr2L	10482533	10482534	RluA-2	2.4	3.4	2.9
chr2L	10484719	10484720	Grip75	6.3	4.5	5.4
chr2L	10485878	10485879	CG7456	2.6	1.6	2.1
chr2L	10486435	10486436	CG7456	4.5	2	3.25
chr2L	10487395	10487396	CG7456	5.3	3.2	4.25
chr2L	10488948	10488949	CG6144	15.4	42.9	29.15
chr2L	10489464	10489465	CG6144	2.2	2.1	2.15
chr2L	10489754	10489755	CG6144	6.4	1.9	4.15
chr2L	10489989	10489990	CG6144	1.6	3.6	2.6
chr2L	10490013	10490014	CG13144	2.3	7.7	5
chr2L	10490158	10490159	CG6144	3.1	4.8	3.95
chr2L	10490191	10490192	CG6144	2.1	1.5	1.8
chr2L	10490286	10490287	CG6144	1	4.3	2.65
chr2L	10490297	10490298	CG13144	1.1	1.6	1.35
chr2L	10490329	10490330	CG6144	1.4	2.3	1.85
chr2L	10490332	10490333	CG6144	1.3	2.2	1.75
chr2L	1050378	1050379	S	1.1	1.2	1.15
chr2L	1050413	1050414	S	3.5	1.2	2.35
chr2L	10507586	10507587	CG6094	5.1	4.4	4.75
chr2L	10508017	10508018	CG6094	6.7	6.7	6.7
chr2L	10511370	10511371	CG45083	0.5	0.4	0.45
chr2L	10511370	10511371	Fatp	0.5	0.4	0.45
chr2L	10511488	10511489	CG45083	0.3	0.3	0.3
chr2L	10511488	10511489	Fatp	0.3	0.3	0.3
chr2L	10511764	10511765	CG45083	0.8	0.6	0.7
chr2L	10511764	10511765	Fatp	0.8	0.6	0.7
chr2L	10511856	10511857	CG45083	5.4	3.2	4.3
chr2L	10511856	10511857	Fatp	5.4	3.2	4.3
chr2L	10512771	10512772	CG45083	2.6	1.3	1.95
chr2L	10512771	10512772	Fatp	2.6	1.3	1.95
chr2L	10513274	10513275	CG45083	3	2.3	2.65
chr2L	10513274	10513275	Fatp	3	2.3	2.65
chr2L	10517765	10517766	Lrr47	15.4	11.1	13.25
chr2L	105231	105232	Nhe1	4.8	3.7	4.25
chr2L	10531373	10531374	Lip4	0.9	1.7	1.3
chr2L	10627091	10627092	Trim9	3.3	2.7	3
chr2L	10627142	10627143	Trim9	3.2	2.6	2.9
chr2L	10627191	10627192	Trim9	7.7	3	5.35
chr2L	10693103	10693104	CG17108	0.1	0.1	0.1
chr2L	10693123	10693124	CG17108	0.1	0.2	0.15
chr2L	10693168	10693169	CG17108	1.38	0.1	0.74
chr2L	10693173	10693174	CG17108	0.2	0.3	0.25
chr2L	10693190	10693191	CG17108	0.3	0.5	0.4
chr2L	10693196	10693197	CG17108	0.3	0.4	0.35
chr2L	10693223	10693224	CG17108	0.3	0	0.15
chr2L	10693225	10693226	CG17108	0.1	0	0.05
chr2L	10693254	10693255	CG17108	0.3	0.15	0.22
chr2L	10693260	10693261	CG17108	0.1	0	0.05
chr2L	10693555	10693556	CG17108	0.25	0.1	0.18
chr2L	10704278	10704279	Lip2	0.9	0.8	0.85
chr2L	10704290	10704291	CG6415	1.1	1.8	1.45
chr2L	10704493	10704494	Lip2	1.1	1.5	1.3
chr2L	10704516	10704517	Lip2	1.1	0.8	0.95
chr2L	10704528	10704529	CG6415	2	0.9	1.45
chr2L	10704588	10704589	Lip2	1.1	1	1.05
chr2L	10704678	10704679	CG6415	0.8	1	0.9
chr2L	10704723	10704724	Lip2	0.9	1	0.95
chr2L	10704744	10704745	CG6415	1	1.1	1.05
chr2L	10704860	10704861	CG6415	1.1	1.3	1.2
chr2L	10729578	10729579	CG6443	1.7	2.1	1.9
chr2L	10729648	10729649	CG6443	2.9	1.1	2
chr2L	10730189	10730190	CG6443	5.1	3.2	4.15
chr2L	10731651	10731652	CG6750	1.6	1.9	1.75
chr2L	10731723	10731724	CG6750	2.9	0.8	1.85
chr2L	10732206	10732207	CG6750	0.8	0.9	0.85
chr2L	10732345	10732346	CG6750	0.6	4.3	2.45
chr2L	10733181	10733182	Dpy-30L1	1.1	1.6	1.35
chr2L	10733440	10733441	Nup107	6.3	2.1	4.2
chr2L	10733707	10733708	Nup107	4.3	6.7	5.5
chr2L	10740096	10740097	CG12299	1.55	2.9	2.23
chr2L	10740337	10740338	CG12299	1.4	1.5	1.45
chr2L	10744186	10744187	CG17124	1.2	0.8	1
chr2L	10745005	10745006	CG17124	1.7	1.5	1.6
chr2L	10745207	10745208	CG17124	0.6	0.5	0.55
chr2L	10745240	10745241	CG17124	0.6	0.6	0.6
chr2L	10745244	10745245	CG17124	1.1	1.1	1.1
chr2L	10745975	10745976	CG17124	1	0.8	0.9
chr2L	10746046	10746047	CG17124	0.7	0.8	0.75
chr2L	10762591	10762592	CG6495	1.7	1.5	1.6
chr2L	10764006	10764007	CG6495	1	1.1	1.05
chr2L	10764862	10764863	CG6495	5.8	1.8	3.8
chr2L	10765606	10765607	UbcD2	1.2	1.2	1.2
chr2L	10768437	10768438	CG6724	2.6	2	2.3
chr2L	10768979	10768980	CG6724	2	2.3	2.15
chr2L	10769261	10769262	CG6724	3.8	4	3.9
chr2L	10769773	10769774	CG6724	4.8	3.4	4.1
chr2L	10806029	10806030	Nos	2.4	4.3	3.35
chr2L	1083163	1083164	Atg4a	0.7	0.7	0.7
chr2L	1083261	1083262	CG4629	1	1	1
chr2L	1083262	1083263	Atg4a	1	1.4	1.2
chr2L	1083511	1083512	Atg4a	0.6	0.8	0.7
chr2L	1083522	1083523	CG4629	0.6	0.8	0.7
chr2L	1083589	1083590	CG4629	1	1.4	1.2
chr2L	10837920	10837921	CG6700	1.1	1.5	1.3
chr2L	10838262	10838263	CG6700	0.6	2	1.3
chr2L	1083831	1083832	Atg4a	2.2	1.1	1.65
chr2L	10838402	10838403	CG6700	1.2	3.4	2.3
chr2L	10838424	10838425	CG6700	0.6	1.2	0.9
chr2L	10838724	10838725	CG6700	2.5	1.9	2.2
chr2L	10838921	10838922	CG6700	2.9	2.6	2.75
chr2L	10847283	10847284	porin	0.1	0.2	0.15
chr2L	10847317	10847318	porin	0.3	0.2	0.25
chr2L	10847319	10847320	porin	0.2	0.2	0.2
chr2L	10847332	10847333	porin	0.1	0.1	0.1
chr2L	10847354	10847355	porin	0.1	0.1	0.1
chr2L	10847392	10847393	porin	0.1	0.5	0.3
chr2L	10847401	10847402	porin	1.1	0.3	0.7
chr2L	10847402	10847403	porin	0.6	0.48	0.54
chr2L	10847411	10847412	porin	0.2	0.3	0.25
chr2L	10847415	10847416	porin	0.1	0.2	0.15
chr2L	10847446	10847447	porin	0.2	0.3	0.25
chr2L	10847455	10847456	porin	0.1	0.1	0.1
chr2L	1084820	1084821	CG4629	4.2	2.2	3.2
chr2L	10848561	10848562	porin	0.1	0.1	0.1
chr2L	10848846	10848847	porin	0.2	0.1	0.15
chr2L	10853390	10853391	CG43129	4.3	5.3	4.8
chr2L	10854788	10854789	Dnz1	2.6	3.1	2.85
chr2L	10854822	10854823	Dnz1	8	2.3	5.15
chr2L	10856283	10856284	Dnz1	4.2	5.6	4.9
chr2L	10964944	10964945	CG33129	0.8	1	0.9
chr2L	10965074	10965075	CG33129	0.3	0.5	0.4
chr2L	10965075	10965076	CG33129	0.3	0.5	0.4
chr2L	10965092	10965093	CG33129	0.4	0.8	0.6
chr2L	10965145	10965146	CG33129	1.7	0.9	1.3
chr2L	10965175	10965176	CG33129	2.7	0.3	1.5
chr2L	10965219	10965220	CG33129	0.3	0.3	0.3
chr2L	10965286	10965287	CG33129	0.5	0.5	0.5
chr2L	10965320	10965321	CG33129	0.5	0.4	0.45
chr2L	10965354	10965355	CG33129	0.3	0.6	0.45
chr2L	10966032	10966033	CG33129	0.7	0.5	0.6
chr2L	10971113	10971114	YL-1	2.6	3.2	2.9
chr2L	10972686	10972687	CG16743	0.2	0.2	0.2
chr2L	10972784	10972785	CG16743	0.9	0.4	0.65
chr2L	10972808	10972809	CG16743	0.3	0.2	0.25
chr2L	10973058	10973059	CG16743	0.3	0.28	0.29
chr2L	10973062	10973063	CG16743	0.2	0.2	0.2
chr2L	10973084	10973085	CG16743	0.7	0.6	0.65
chr2L	10975764	10975765	l(2)06225	0.6	0.6	0.6
chr2L	10975830	10975831	l(2)06225	0.2	0.2	0.2
chr2L	10975844	10975845	l(2)06225	0.2	0.3	0.25
chr2L	10976077	10976078	l(2)06225	0.8	0.43	0.62
chr2L	10981867	10981868	SCAR	1.6	0.8	1.2
chr2L	10981901	10981902	SCAR	1	0.8	0.9
chr2L	10982141	10982142	SCAR	0.7	0.9	0.8
chr2L	10982155	10982156	SCAR	1.3	0.8	1.05
chr2L	10988418	10988419	CG12253	2	3	2.5
chr2L	10988904	10988905	CG12253	2.8	3.7	3.25
chr2L	10993623	10993624	CG16833	4.12	10.7	7.41
chr2L	10993934	10993935	CG16833	1.6	1.3	1.45
chr2L	11002874	11002875	RpL9	0.1	0.1	0.1
chr2L	11003752	11003753	RpL9	0.35	0.15	0.25
chr2L	11004037	11004038	RpL9	0	0.1	0.05
chr2L	11004049	11004050	RpL9	0.2	0.1	0.15
chr2L	11011955	11011956	dUTPase	2.5	2.9	2.7
chr2L	1103556	1103557	mtRNApol	3.8	9.1	6.45
chr2L	1104265	1104266	mtRNApol	4	2.6	3.3
chr2L	11076236	11076237	AstC	1.5	0.9	1.2
chr2L	11076260	11076261	AstC	0.5	0.4	0.45
chr2L	11076272	11076273	AstC	1	0.9	0.95
chr2L	11076296	11076297	AstC	0.3	0.5	0.4
chr2L	11076328	11076329	AstC	0.2	0.4	0.3
chr2L	11076335	11076336	AstC	0.2	0.2	0.2
chr2L	11076372	11076373	AstC	0.6	0.3	0.45
chr2L	11076379	11076380	AstC	0.3	0.7	0.5
chr2L	11076380	11076381	AstC	1.7	0.8	1.25
chr2L	11076381	11076382	AstC	11.1	2.9	7
chr2L	11076382	11076383	AstC	5.9	1.6	3.75
chr2L	11076392	11076393	AstC	0.3	0.4	0.35
chr2L	11076444	11076445	AstC	0.5	0.6	0.55
chr2L	11076492	11076493	AstC	6.8	7	6.9
chr2L	11076520	11076521	AstC	0.7	0.6	0.65
chr2L	11076521	11076522	AstC	0.7	0.6	0.65
chr2L	11076525	11076526	AstC	0.7	0.6	0.65
chr2L	11076557	11076558	AstC	0.2	0.2	0.2
chr2L	11076598	11076599	AstC	0.52	0.6	0.56
chr2L	11076673	11076674	AstC	2.33	1.32	1.83
chr2L	11076678	11076679	AstC	1.2	1.3	1.25
chr2L	11076700	11076701	AstC	0.8	0.3	0.55
chr2L	11077217	11077218	AstC	0.2	0.2	0.2
chr2L	11081156	11081157	AstC	0.3	0.3	0.3
chr2L	11094840	11094841	CG4705	10	11.1	10.55
chr2L	11096044	11096045	Ge-1	2.6	3	2.8
chr2L	11099663	11099664	Ge-1	33.3	14.3	23.8
chr2L	11101314	11101315	Reps	1.5	1.7	1.6
chr2L	11102127	11102128	Reps	5.9	5.3	5.6
chr2L	11108295	11108296	l(2)gd1	16.7	7.7	12.2
chr2L	11110568	11110569	l(2)gd1	2.4	3.4	2.9
chr2L	11111136	11111137	CG6201	3.3	3.6	3.45
chr2L	11116065	11116066	CG6230	8.2	2.2	5.2
chr2L	11116157	11116158	CG6230	2.3	2.4	2.35
chr2L	11117025	11117026	CG6230	7.7	4.3	6
chr2L	11122884	11122885	Csl4	1.4	3.8	2.6
chr2L	11123054	11123055	Csl4	2.1	2.1	2.1
chr2L	11123154	11123155	Csl4	2.6	2.6	2.6
chr2L	11123244	11123245	Csl4	2.8	2.2	2.5
chr2L	11128579	11128580	Nup160	3.7	4	3.85
chr2L	11129142	11129143	RfC38	5.3	10	7.65
chr2L	11129813	11129814	RfC38	2.9	3.6	3.25
chr2L	11134616	11134617	CG4751	14.3	8.3	11.3
chr2L	11135877	11135878	CG4751	7.5	4.5	6
chr2L	11151611	11151612	CG6287	0.3	0.3	0.3
chr2L	11151670	11151671	CG6287	0.3	0.2	0.25
chr2L	11151725	11151726	CG6287	0.3	0.3	0.3
chr2L	11152006	11152007	CG6287	0.1	0.1	0.1
chr2L	11152242	11152243	CG6287	0.3	0.3	0.3
chr2L	11152252	11152253	CG6287	0.2	0.4	0.3
chr2L	11152348	11152349	CG6287	0.2	0.3	0.25
chr2L	11152350	11152351	CG6287	0.2	0.3	0.25
chr2L	11152421	11152422	CG6287	0.4	0.2	0.3
chr2L	1115326	1115327	Pino	0.5	0.3	0.4
chr2L	11155518	11155519	CG6287	0.2	0.2	0.2
chr2L	11155585	11155586	CG6287	0.1	0.2	0.15
chr2L	11156442	11156443	Ca-beta	0.5	0.7	0.6
chr2L	11156532	11156533	Ca-beta	1.6	1.2	1.4
chr2L	11156869	11156870	Ca-beta	1	1.8	1.4
chr2L	11156914	11156915	Ca-beta	2.4	2.6	2.5
chr2L	11157009	11157010	Ca-beta	1.3	2.3	1.8
chr2L	11157030	11157031	Ca-beta	1.6	1.2	1.4
chr2L	11157132	11157133	Ca-beta	3.8	1.6	2.7
chr2L	1116628	1116629	Pino	1.2	0.7	0.95
chr2L	1118964	1118965	Pino	1.1	0.5	0.8
chr2L	11225705	11225706	ab	0.7	0.9	0.8
chr2L	11225803	11225804	ab	0.5	0.9	0.7
chr2L	11235534	11235535	ab	0.4	0.8	0.6
chr2L	11235555	11235556	ab	0.4	0.8	0.6
chr2L	11235590	11235591	ab	0.6	1.2	0.9
chr2L	11236348	11236349	ab	1.7	1.8	1.75
chr2L	11236390	11236391	ab	1.6	2.6	2.1
chr2L	11236432	11236433	ab	2.9	5.9	4.4
chr2L	11257134	11257135	ab	2.6	3.3	2.95
chr2L	112763	112764	Sam-S	0.5	0.3	0.4
chr2L	11278831	11278832	CG33695	4.5	4	4.25
chr2L	11279643	11279644	CG33695	2.7	3.7	3.2
chr2L	11281592	11281593	Ppt2	1.3	1.2	1.25
chr2L	11281599	11281600	Ppt2	1.4	2.2	1.8
chr2L	11281874	11281875	Ppt2	2.2	1.9	2.05
chr2L	11283854	11283855	mre11	1.5	1.6	1.55
chr2L	11283945	11283946	mre11	1.8	3.6	2.7
chr2L	11284069	11284070	mre11	1.6	2.1	1.85
chr2L	11284084	11284085	mre11	1.4	3.8	2.6
chr2L	113067	113068	Sam-S	0.8	0.3	0.55
chr2L	1132315	1132316	CG4552	3.6	1.4	2.5
chr2L	113249	113250	Sam-S	4.2	2.6	3.4
chr2L	1132553	1132554	Iris	0.7	0.6	0.65
chr2L	1132700	1132701	Iris	1.3	1	1.15
chr2L	1132903	1132904	Iris	0.8	0.7	0.75
chr2L	1133027	1133028	Iris	0.6	1.1	0.85
chr2L	1133043	1133044	Iris	0.6	0.6	0.6
chr2L	1133118	1133119	Iris	1.4	1.3	1.35
chr2L	1133298	1133299	Iris	1.3	1	1.15
chr2L	113368	113369	Sam-S	0.4	0.2	0.3
chr2L	113537	113538	Sam-S	0.4	0.2	0.3
chr2L	113581	113582	Sam-S	0.3	0.1	0.2
chr2L	113646	113647	Sam-S	0.55	0.4	0.48
chr2L	113652	113653	Sam-S	0.2	0.1	0.15
chr2L	113664	113665	Sam-S	0.2	0.1	0.15
chr2L	113694	113695	Sam-S	3.7	2.23	2.96
chr2L	11372660	11372661	salr	7.1	12.5	9.8
chr2L	11373238	11373239	salr	2.8	6.3	4.55
chr2L	113861	113862	Sam-S	0.2	0.1	0.15
chr2L	113865	113866	Sam-S	0.2	0.1	0.15
chr2L	113882	113883	Sam-S	0.2	0.6	0.4
chr2L	113901	113902	Sam-S	0.2	0.2	0.2
chr2L	113932	113933	Sam-S	0.2	0.2	0.2
chr2L	113963	113964	Sam-S	0.2	0.2	0.2
chr2L	113985	113986	Sam-S	0.4	0.2	0.3
chr2L	1139948	1139949	CG4577	0.9	0.85	0.88
chr2L	114000	114001	Sam-S	0.2	0.2	0.2
chr2L	1140088	1140089	CG4577	0.2	0.1	0.15
chr2L	1140275	1140276	CG4577	0.2	0.6	0.4
chr2L	1140277	1140278	CG4577	0.2	0.3	0.25
chr2L	1140359	1140360	CG4577	0.4	0.2	0.3
chr2L	1140369	1140370	CG4577	1.1	0.75	0.92
chr2L	1140460	1140461	CG4577	0.3	0.3	0.3
chr2L	1140472	1140473	CG4577	0.1	0.3	0.2
chr2L	1140503	1140504	CG4577	1.7	1.1	1.4
chr2L	1140532	1140533	CG4577	0.1	0.1	0.1
chr2L	1140552	1140553	CG4577	0.15	0.2	0.18
chr2L	1140630	1140631	CG4577	0.1	0.1	0.1
chr2L	1140666	1140667	CG4577	4.55	2.1	3.33
chr2L	1140685	1140686	CG4577	1.48	0.65	1.06
chr2L	1140698	1140699	CG4577	31.5	10.1	20.8
chr2L	1140700	1140701	CG4577	1.68	1.28	1.48
chr2L	1140702	1140703	CG4577	1.2	0.3	0.75
chr2L	1140706	1140707	CG4577	0.65	0.75	0.7
chr2L	1140708	1140709	CG4577	0.2	0.2	0.2
chr2L	1140712	1140713	CG4577	0.2	0.8	0.5
chr2L	1140720	1140721	CG4577	1.1	0.4	0.75
chr2L	1140726	1140727	CG4577	1	0.3	0.65
chr2L	1140728	1140729	CG4577	11.7	3.4	7.55
chr2L	1140729	1140730	CG4577	2.3	0.6	1.45
chr2L	1140737	1140738	CG4577	0.2	0.1	0.15
chr2L	1140740	1140741	CG4577	0.1	0.3	0.2
chr2L	1140750	1140751	CG4577	0.35	0.15	0.25
chr2L	1140759	1140760	CG4577	0.1	0.1	0.1
chr2L	1140778	1140779	CG4577	1.3	1.1	1.2
chr2L	1140779	1140780	CG4577	0.4	0.2	0.3
chr2L	1140780	1140781	CG4577	0.6	0.8	0.7
chr2L	1140796	1140797	CG4577	0.4	0.3	0.35
chr2L	1140805	1140806	CG4577	0.1	0.1	0.1
chr2L	1140809	1140810	CG4577	0.35	0.88	0.62
chr2L	1140823	1140824	CG4577	0.2	0.3	0.25
chr2L	1140824	1140825	CG4577	0.1	0.1	0.1
chr2L	1140830	1140831	CG4577	0.1	0.2	0.15
chr2L	1140863	1140864	CG4577	0.2	0.4	0.3
chr2L	1140864	1140865	CG4577	0.3	0.2	0.25
chr2L	1140874	1140875	CG4577	0.2	0.4	0.3
chr2L	1140876	1140877	CG4577	0.2	0.2	0.2
chr2L	1140882	1140883	CG4577	0.4	0.5	0.45
chr2L	1140888	1140889	CG4577	0.2	0.2	0.2
chr2L	1140891	1140892	CG4577	0.4	0.3	0.35
chr2L	1140906	1140907	CG4577	0.9	0.4	0.65
chr2L	114105	114106	Sam-S	0.4	0.2	0.3
chr2L	114159	114160	Sam-S	0.3	0.4	0.35
chr2L	114268	114269	Sam-S	0.4	0.5	0.45
chr2L	1147016	1147017	MFS3	9.1	5	7.05
chr2L	114803	114804	CG11455	5	5.3	5.15
chr2L	11496891	11496892	CG6488	4.8	7.1	5.95
chr2L	1151498	1151499	Vps29	3.8	8.3	6.05
chr2L	1152255	1152256	capt	0.6	0.6	0.6
chr2L	11523312	11523313	CG31705	1.1	0.5	0.8
chr2L	11523324	11523325	CG31705	0.6	1.4	1
chr2L	11524935	11524936	CG31705	0.2	0.3	0.25
chr2L	1152799	1152800	capt	0.9	0.6	0.75
chr2L	11528130	11528131	CG31705	0.2	0.1	0.15
chr2L	1152900	1152901	capt	1.9	0.7	1.3
chr2L	11529552	11529553	CG31706	0.2	0.2	0.2
chr2L	11529663	11529664	CG31706	0.1	0.1	0.1
chr2L	11529875	11529876	CG31706	0.1	0.1	0.1
chr2L	11529880	11529881	CG31706	0.1	0.1	0.1
chr2L	11529989	11529990	CG31706	0.1	0.1	0.1
chr2L	11530781	11530782	CG31706	0.2	0.5	0.35
chr2L	11530942	11530943	CG31706	0.28	0.1	0.19
chr2L	1153599	1153600	capt	2.6	1.1	1.85
chr2L	1158973	1158974	Tango14	3.9	1.3	2.6
chr2L	1159225	1159226	CR43767	1.8	1.8	1.8
chr2L	1159228	1159229	CR43767	1.8	2	1.9
chr2L	1159969	1159970	Tango14	4.7	2.6	3.65
chr2L	1160098	1160099	Tango14	8.8	1.9	5.35
chr2L	1160721	1160722	CG5080	0.5	0.3	0.4
chr2L	1161164	1161165	CG5080	2.6	0.6	1.6
chr2L	1161497	1161498	CG5080	2	0.9	1.45
chr2L	1161547	1161548	CG5080	0.8	1	0.9
chr2L	1161988	1161989	CG5080	1.6	1.2	1.4
chr2L	1162071	1162072	CG5080	1.6	0.9	1.25
chr2L	1162101	1162102	CG5080	1.8	0.7	1.25
chr2L	11625332	11625333	kek2	7.7	5	6.35
chr2L	11626381	11626382	kek2	1.2	2.4	1.8
chr2L	11626383	11626384	kek2	0.9	1.2	1.05
chr2L	11626437	11626438	kek2	1.5	0.8	1.15
chr2L	11626442	11626443	kek2	0.8	2.23	1.52
chr2L	1165660	1165661	IntS14	6.3	9.1	7.7
chr2L	1168081	1168082	Plap	3.1	5.9	4.5
chr2L	1169466	1169467	Plap	12.5	12.5	12.5
chr2L	1171904	1171905	CG5118	3.8	5.3	4.55
chr2L	117392	117393	CG4822	1.9	4.1	3
chr2L	117633	117634	CG11455	1.5	1.9	1.7
chr2L	1177060	1177061	CG4887	1.5	1	1.25
chr2L	1177288	1177289	CG4887	1.4	0.8	1.1
chr2L	11794480	11794481	crol	0.9	0.5	0.7
chr2L	11794497	11794498	crol	1.7	1.9	1.8
chr2L	11794512	11794513	crol	0.4	0.4	0.4
chr2L	11794554	11794555	crol	0.3	0.3	0.3
chr2L	11794570	11794571	crol	0.4	0.4	0.4
chr2L	11794640	11794641	crol	0.4	1.2	0.8
chr2L	11794647	11794648	crol	0.7	0.4	0.55
chr2L	11794744	11794745	crol	0.5	0.5	0.5
chr2L	11794806	11794807	crol	0.68	0.6	0.64
chr2L	11794830	11794831	crol	1.4	0.7	1.05
chr2L	11794903	11794904	crol	2.5	2.1	2.3
chr2L	11794982	11794983	crol	0.6	0.7	0.65
chr2L	11795078	11795079	crol	1.2	3.9	2.55
chr2L	11795083	11795084	crol	0.8	0.9	0.85
chr2L	11795204	11795205	crol	0.8	0.7	0.75
chr2L	11795274	11795275	crol	5.7	1.4	3.55
chr2L	11795440	11795441	crol	1.1	1	1.05
chr2L	11795766	11795767	crol	2.4	0.7	1.55
chr2L	11810429	11810430	CycY	4.6	1.7	3.15
chr2L	11810529	11810530	CycY	1.2	1.5	1.35
chr2L	11811001	11811002	CycY	1.8	2.4	2.1
chr2L	11811046	11811047	CycY	8.1	2.2	5.15
chr2L	11811162	11811163	CycY	2.9	3	2.95
chr2L	11811238	11811239	CycY	2.4	3.8	3.1
chr2L	11814198	11814199	Pde1c	1.3	0.9	1.1
chr2L	11814208	11814209	Pde1c	1.2	0.8	1
chr2L	11814234	11814235	Pde1c	4.7	0.6	2.65
chr2L	11814254	11814255	Pde1c	0.4	0.6	0.5
chr2L	11814298	11814299	Pde1c	1	0.5	0.75
chr2L	11814376	11814377	Pde1c	0.4	0.6	0.5
chr2L	11814415	11814416	Pde1c	0.3	0.5	0.4
chr2L	11814434	11814435	Pde1c	1.3	1.4	1.35
chr2L	11814519	11814520	Pde1c	0.5	0.4	0.45
chr2L	11814549	11814550	Pde1c	1.8	2	1.9
chr2L	11814727	11814728	Pde1c	0.5	0.5	0.5
chr2L	11814811	11814812	Pde1c	0.9	1.7	1.3
chr2L	11814865	11814866	Pde1c	1.2	1.1	1.15
chr2L	11814931	11814932	Pde1c	2.1	2.4	2.25
chr2L	1181502	1181503	CG4896	5.3	3.8	4.55
chr2L	11815061	11815062	Pde1c	3.3	3.6	3.45
chr2L	11815066	11815067	Pde1c	0.9	0.9	0.9
chr2L	11815079	11815080	Pde1c	1.1	1	1.05
chr2L	11815224	11815225	Pde1c	3.38	0.9	2.14
chr2L	11815346	11815347	Pde1c	0.8	1.4	1.1
chr2L	11815925	11815926	Pde1c	3.4	4	3.7
chr2L	118183	118184	CG4822	2	5	3.5
chr2L	1181895	1181896	CG4896	2.1	2.3	2.2
chr2L	1182077	1182078	CG4896	0.8	1	0.9
chr2L	1182394	1182395	CG4896	1.1	1	1.05
chr2L	11830649	11830650	Pde1c	2.8	3.8	3.3
chr2L	1183761	1183762	CG5126	4	3.3	3.65
chr2L	11840938	11840939	CG31704	3	1.3	2.15
chr2L	11840939	11840940	CG31704	1.7	2.8	2.25
chr2L	11841915	11841916	CG44008	3	1.1	2.05
chr2L	11841915	11841916	Pde1c	3	1.1	2.05
chr2L	11841929	11841930	CG44008	0.6	0.8	0.7
chr2L	11841929	11841930	Pde1c	0.6	0.8	0.7
chr2L	11842081	11842082	CG44008	0.9	0.6	0.75
chr2L	11842081	11842082	Pde1c	0.9	0.6	0.75
chr2L	11842907	11842908	Pde1c	0.4	0.4	0.4
chr2L	11842931	11842932	CG14933	0.3	0.4	0.35
chr2L	11842960	11842961	CG14933	0.6	0.8	0.7
chr2L	11843006	11843007	Pde1c	0.7	0.9	0.8
chr2L	11843397	11843398	CG14933	0.2	0.2	0.2
chr2L	11843397	11843398	CG42486	0.2	0.2	0.2
chr2L	11843420	11843421	CG14933	0.5	0.2	0.35
chr2L	11843420	11843421	CG42486	0.5	0.2	0.35
chr2L	11843636	11843637	CG14933	0.8	0.5	0.65
chr2L	11843636	11843637	CG42486	0.8	0.5	0.65
chr2L	11843719	11843720	CG14933	1.8	1.4	1.6
chr2L	11843719	11843720	CG42486	1.8	1.4	1.6
chr2L	11843723	11843724	Pde1c	2.3	3	2.65
chr2L	11843727	11843728	CG14933	2.5	2	2.25
chr2L	11843727	11843728	CG42486	2.5	2	2.25
chr2L	11843855	11843856	Pde1c	0.6	0.6	0.6
chr2L	11843954	11843955	Pde1c	1.1	2.2	1.65
chr2L	11850664	11850665	Mal-B2	2.8	1.3	2.05
chr2L	11851014	11851015	Pde1c	1.3	1.9	1.6
chr2L	11851154	11851155	Mal-B2	1.3	0.9	1.1
chr2L	11851268	11851269	Mal-B2	1.4	0.9	1.15
chr2L	11851895	11851896	Mal-B2	1	0.8	0.9
chr2L	11851907	11851908	Mal-B2	0.9	0.9	0.9
chr2L	11851994	11851995	Pde1c	0.7	1.9	1.3
chr2L	11852146	11852147	Pde1c	1.5	1.2	1.35
chr2L	11852424	11852425	Pde1c	0.6	0.5	0.55
chr2L	11852442	11852443	Mal-B2	0.6	0.5	0.55
chr2L	11852464	11852465	Mal-B2	1.2	0.6	0.9
chr2L	118587	118588	CG4822	4.2	2.6	3.4
chr2L	11984470	11984471	CG6686	0.9	1.2	1.05
chr2L	11985498	11985499	CG6686	1.5	1.2	1.35
chr2L	11991967	11991968	escl	6.3	7.1	6.7
chr2L	12001505	12001506	CG6746	1.8	0.5	1.15
chr2L	12001844	12001845	CG6746	1	0.4	0.7
chr2L	12002023	12002024	CG6746	1.7	0.7	1.2
chr2L	12002035	12002036	CG6746	0.9	1.6	1.25
chr2L	12009567	12009568	Rh5	4.3	1.2	2.75
chr2L	12036493	12036494	Tom70	1.3	2.2	1.75
chr2L	12037353	12037354	Tom70	2.7	5.3	4
chr2L	12039085	12039086	CG6766	0.6	0.6	0.6
chr2L	12040357	12040358	CG6766	1.9	1.3	1.6
chr2L	12045346	12045347	CG6770	0.9	1	0.95
chr2L	12045369	12045370	CG6770	0.5	0.2	0.35
chr2L	12045405	12045406	CG6770	0.1	0.1	0.1
chr2L	12045414	12045415	CG6770	0.28	0.08	0.18
chr2L	12045421	12045422	CG6770	0.1	0.1	0.1
chr2L	12045452	12045453	CG6770	0	0.1	0.05
chr2L	12045454	12045455	CG6770	0	0.1	0.05
chr2L	12045490	12045491	CG6770	0.1	0.1	0.1
chr2L	12045496	12045497	CG6770	0.1	0.1	0.1
chr2L	12045505	12045506	CG6770	0.1	0.1	0.1
chr2L	12045527	12045528	CG6770	2.05	1.1	1.57
chr2L	12045684	12045685	CG6770	0.02	0	0.01
chr2L	12045696	12045697	CG6770	0.1	0	0.05
chr2L	12045991	12045992	CG6770	0.08	0.08	0.08
chr2L	12046078	12046079	CG6770	0.1	0.1	0.1
chr2L	12050066	12050067	CG14945	1.3	1.1	1.2
chr2L	12050297	12050298	CG14945	1.6	0.7	1.15
chr2L	12050308	12050309	CG14945	0.9	0.8	0.85
chr2L	12050482	12050483	CG14945	1	0.9	0.95
chr2L	12050987	12050988	CG14945	0.9	1.1	1
chr2L	12051735	12051736	CG14945	0.6	0.8	0.7
chr2L	12051866	12051867	CG14945	0.4	0.6	0.5
chr2L	12051926	12051927	JhI-21	2.2	0.5	1.35
chr2L	12051933	12051934	CG14945	1.2	0.5	0.85
chr2L	12052350	12052351	JhI-21	2.3	4.9	3.6
chr2L	12056625	12056626	CG34164	1	0.8	0.9
chr2L	12056625	12056626	RpL7-like	1	0.8	0.9
chr2L	12056806	12056807	CG34164	3.3	0.7	2
chr2L	12056806	12056807	RpL7-like	3.3	0.7	2
chr2L	12057003	12057004	CG34164	1.4	0.4	0.9
chr2L	12057003	12057004	RpL7-like	1.4	0.4	0.9
chr2L	12057107	12057108	CG34164	1.1	1.1	1.1
chr2L	12057107	12057108	RpL7-like	1.1	1.1	1.1
chr2L	12057305	12057306	CG34164	0.5	0.9	0.7
chr2L	12057305	12057306	RpL7-like	0.5	0.9	0.7
chr2L	12057384	12057385	CG34164	1.1	1.1	1.1
chr2L	12057384	12057385	RpL7-like	1.1	1.1	1.1
chr2L	12063836	12063837	CG14946	2.4	1.4	1.9
chr2L	12064077	12064078	CG14946	1.9	1.4	1.65
chr2L	12064457	12064458	CG14946	3	1	2
chr2L	12094599	12094600	Pex19	2.2	0.5	1.35
chr2L	12094857	12094858	Pex19	0.62	0.48	0.55
chr2L	12095143	12095144	Pex19	1.6	1	1.3
chr2L	12095162	12095163	Pex19	2.1	1.6	1.85
chr2L	12100199	12100200	Ced-12	4	3.6	3.8
chr2L	12100910	12100911	Patsas	4.4	2.8	3.6
chr2L	12105493	12105494	Aats-thr	1.4	1	1.2
chr2L	12106705	12106706	Aats-thr	0.6	1.4	1
chr2L	12106708	12106709	Aats-thr	2.5	0.7	1.6
chr2L	12106710	12106711	Aats-thr	1.9	0.7	1.3
chr2L	12106734	12106735	Aats-thr	3.95	0.9	2.43
chr2L	12108308	12108309	Rab6	6.7	2.9	4.8
chr2L	12168467	12168468	CG31760	4	2.3	3.15
chr2L	12170358	12170359	CG31760	0.9	1.7	1.3
chr2L	12170446	12170447	CG31760	1.6	1.1	1.35
chr2L	12175551	12175552	aret	2	0.3	1.15
chr2L	12175749	12175750	aret	0.9	1.5	1.2
chr2L	12176870	12176871	aret	2.1	0.3	1.2
chr2L	12176883	12176884	aret	2.2	0.4	1.3
chr2L	12222306	12222307	aret	1.6	0.7	1.15
chr2L	12222328	12222329	aret	0.8	0.9	0.85
chr2L	12240931	12240932	aret	0.9	1.6	1.25
chr2L	12240933	12240934	aret	1	1.6	1.3
chr2L	12241049	12241050	aret	1	1.1	1.05
chr2L	12241069	12241070	aret	1.3	3	2.15
chr2L	122766	122767	CG11455	0.9	0.4	0.65
chr2L	122826	122827	CG3164	0.4	0.3	0.35
chr2L	122852	122853	CG11455	1	0.3	0.65
chr2L	122852	122853	CR44969	1	0.3	0.65
chr2L	122861	122862	CG11455	0.6	0.3	0.45
chr2L	122861	122862	CR44969	0.6	0.3	0.45
chr2L	122897	122898	CG3164	0.2	0.2	0.2
chr2L	122912	122913	CG11455	0.2	0.2	0.2
chr2L	122912	122913	CR44969	0.2	0.2	0.2
chr2L	122975	122976	CG11455	0.3	0.4	0.35
chr2L	122975	122976	CR44969	0.3	0.4	0.35
chr2L	122978	122979	CG11455	0.2	0.5	0.35
chr2L	122978	122979	CR44969	0.2	0.5	0.35
chr2L	122979	122980	CG3164	0.3	0.3	0.3
chr2L	123017	123018	CG11455	0.52	0.52	0.52
chr2L	123017	123018	CR44969	0.52	0.52	0.52
chr2L	123021	123022	CG3164	0.8	0.7	0.75
chr2L	123032	123033	CG11455	0.4	0.7	0.55
chr2L	123032	123033	CR44969	0.4	0.7	0.55
chr2L	123045	123046	CG11455	0.9	0.4	0.65
chr2L	123045	123046	CR44969	0.9	0.4	0.65
chr2L	123078	123079	CG11455	0.8	1	0.9
chr2L	123078	123079	CR44969	0.8	1	0.9
chr2L	123080	123081	CG11455	0.3	0.3	0.3
chr2L	123080	123081	CR44969	0.3	0.3	0.3
chr2L	123113	123114	CG11455	0.3	0.3	0.3
chr2L	123113	123114	CR44969	0.3	0.3	0.3
chr2L	123123	123124	CG3164	0.3	0.3	0.3
chr2L	123160	123161	CG11455	0.5	0.5	0.5
chr2L	123160	123161	CR44969	0.5	0.5	0.5
chr2L	123534	123535	CG11455	1.1	0.3	0.7
chr2L	123534	123535	CR44969	1.1	0.3	0.7
chr2L	123703	123704	CG11455	0.3	0.3	0.3
chr2L	123703	123704	CR44969	0.3	0.3	0.3
chr2L	123738	123739	CG3164	0.3	0.6	0.45
chr2L	123895	123896	CG11455	0.6	0.5	0.55
chr2L	123895	123896	CR44969	0.6	0.5	0.55
chr2L	123959	123960	CG3164	0.4	0.3	0.35
chr2L	12403372	12403373	vir-1	0.6	0.9	0.75
chr2L	12403482	12403483	vir-1	0.2	0.3	0.25
chr2L	12403672	12403673	vir-1	0.2	0.5	0.35
chr2L	12403680	12403681	vir-1	0.4	0.2	0.3
chr2L	12403974	12403975	vir-1	0.3	0.4	0.35
chr2L	12407248	12407249	vir-1	0.1	0.1	0.1
chr2L	12407402	12407403	vir-1	0.1	0.1	0.1
chr2L	12409590	12409591	vir-1	0.1	0.1	0.1
chr2L	1242006	1242007	CG5397	0.9	0.9	0.9
chr2L	12421781	12421782	vir-1	0.3	1.3	0.8
chr2L	124233	124234	CG11455	0.8	0.3	0.55
chr2L	12427056	12427057	CG5446	1.3	1.1	1.2
chr2L	12427232	12427233	CG5446	0.6	1.1	0.85
chr2L	12427278	12427279	CG5446	1.9	0.6	1.25
chr2L	12427304	12427305	CG5446	0.6	0.6	0.6
chr2L	12428454	12428455	CG6388	12.5	14.3	13.4
chr2L	12429509	12429510	CG6388	4.2	2.9	3.55
chr2L	12429550	12429551	CG6388	4.3	5.6	4.95
chr2L	12432355	12432356	SC35	1.7	1	1.35
chr2L	12441831	12441832	Oatp33Ea	6.3	8.3	7.3
chr2L	12455676	12455677	bun	0.1	0.1	0.1
chr2L	12455780	12455781	bun	0.1	0.1	0.1
chr2L	12455799	12455800	bun	0.2	0.1	0.15
chr2L	12455855	12455856	bun	0.3	0.1	0.2
chr2L	12455912	12455913	bun	0.1	0.2	0.15
chr2L	12455923	12455924	bun	0.2	0.2	0.2
chr2L	12455939	12455940	bun	0.1	0.1	0.1
chr2L	12455983	12455984	bun	0.1	0.15	0.12
chr2L	12456047	12456048	bun	0.1	0.2	0.15
chr2L	12456205	12456206	bun	0.2	0.1	0.15
chr2L	12456248	12456249	bun	0.1	0.2	0.15
chr2L	12456249	12456250	bun	0.2	0.1	0.15
chr2L	12456302	12456303	bun	0.1	0.2	0.15
chr2L	12456311	12456312	bun	0.1	0.2	0.15
chr2L	12456333	12456334	bun	0.25	0.25	0.25
chr2L	12456351	12456352	bun	0.1	0.1	0.1
chr2L	12456366	12456367	bun	0.4	0.1	0.25
chr2L	12456374	12456375	bun	0.15	0.1	0.12
chr2L	12456395	12456396	bun	0.1	0.4	0.25
chr2L	12456402	12456403	bun	0.1	0.1	0.1
chr2L	12456406	12456407	bun	0.1	0.1	0.1
chr2L	12456410	12456411	bun	0.1	0.12	0.11
chr2L	12456440	12456441	bun	0.1	0.1	0.1
chr2L	12456441	12456442	bun	0.1	0.1	0.1
chr2L	12456443	12456444	bun	0.1	0.1	0.1
chr2L	12456447	12456448	bun	0.2	0.1	0.15
chr2L	12456463	12456464	bun	0.1	0.1	0.1
chr2L	12456467	12456468	bun	0.1	0.1	0.1
chr2L	12456473	12456474	bun	0.1	0.1	0.1
chr2L	12456476	12456477	bun	0.1	0.18	0.14
chr2L	12456477	12456478	bun	0.1	0.2	0.15
chr2L	12456478	12456479	bun	0.3	0.5	0.4
chr2L	12456479	12456480	bun	1.3	1.4	1.35
chr2L	12456487	12456488	bun	0.1	0.1	0.1
chr2L	12456498	12456499	bun	0.1	0.1	0.1
chr2L	12456505	12456506	bun	0.1	0.2	0.15
chr2L	12456522	12456523	bun	0.1	0.2	0.15
chr2L	12456523	12456524	bun	0.1	0.2	0.15
chr2L	12456524	12456525	bun	0.1	0.1	0.1
chr2L	12456533	12456534	bun	0.3	0.1	0.2
chr2L	12456534	12456535	bun	0.3	0.3	0.3
chr2L	12456535	12456536	bun	0.3	0.1	0.2
chr2L	12456605	12456606	bun	0.2	0.4	0.3
chr2L	12456631	12456632	bun	0.3	0.2	0.25
chr2L	12456640	12456641	bun	0.2	0.4	0.3
chr2L	12456643	12456644	bun	0.4	0.3	0.35
chr2L	12456644	12456645	bun	0.2	0.2	0.2
chr2L	12456677	12456678	bun	0.1	0.2	0.15
chr2L	12456714	12456715	bun	0.1	0.2	0.15
chr2L	12456722	12456723	bun	0.3	0.1	0.2
chr2L	12456746	12456747	bun	0.1	0.1	0.1
chr2L	12456767	12456768	bun	0.1	0.2	0.15
chr2L	12456772	12456773	bun	0.1	0.1	0.1
chr2L	12456779	12456780	bun	0.1	0.1	0.1
chr2L	12456789	12456790	bun	0.1	0.1	0.1
chr2L	12456790	12456791	bun	0.1	0.1	0.1
chr2L	12456791	12456792	bun	0.1	0.1	0.1
chr2L	12456797	12456798	bun	0.2	0.1	0.15
chr2L	12456800	12456801	bun	0.1	0.1	0.1
chr2L	12456808	12456809	bun	0.1	0.1	0.1
chr2L	12456838	12456839	bun	0.1	0.2	0.15
chr2L	12456848	12456849	bun	0.2	0.4	0.3
chr2L	12456856	12456857	bun	0.2	0.2	0.2
chr2L	12456857	12456858	bun	0.4	0.1	0.25
chr2L	12456866	12456867	bun	0.1	0.1	0.1
chr2L	12456870	12456871	bun	0.1	0.1	0.1
chr2L	12456880	12456881	bun	0.1	0.1	0.1
chr2L	12456882	12456883	bun	0.1	0.1	0.1
chr2L	12456898	12456899	bun	0.3	0.1	0.2
chr2L	12456924	12456925	bun	0.1	0.1	0.1
chr2L	12457059	12457060	bun	0.1	0.1	0.1
chr2L	12457080	12457081	bun	0.77	0.25	0.51
chr2L	12457284	12457285	bun	0.68	0.3	0.49
chr2L	12460632	12460633	bun	0.3	0.1	0.2
chr2L	12460660	12460661	bun	0.4	0.2	0.3
chr2L	12460664	12460665	bun	0.4	0.2	0.3
chr2L	12460710	12460711	bun	0.3	0.4	0.35
chr2L	12460750	12460751	bun	0.2	0.3	0.25
chr2L	12460754	12460755	bun	1	0.8	0.9
chr2L	12460762	12460763	bun	0.2	0.2	0.2
chr2L	12460764	12460765	bun	0.2	0.2	0.2
chr2L	12460775	12460776	bun	0.2	0.2	0.2
chr2L	12460784	12460785	bun	0.2	0.7	0.45
chr2L	12460794	12460795	bun	0.2	0.3	0.25
chr2L	12460828	12460829	bun	0.28	0.18	0.23
chr2L	12460843	12460844	bun	0.4	0.3	0.35
chr2L	12460864	12460865	bun	0.2	0.2	0.2
chr2L	12460884	12460885	bun	0.2	0.2	0.2
chr2L	12460890	12460891	bun	0.6	1	0.8
chr2L	12460918	12460919	bun	0.2	0.2	0.2
chr2L	12460966	12460967	bun	0.3	0.2	0.25
chr2L	12460968	12460969	bun	1	0.9	0.95
chr2L	12461014	12461015	bun	0.2	0.3	0.25
chr2L	12461016	12461017	bun	0.4	0.4	0.4
chr2L	12461029	12461030	bun	0.4	0.4	0.4
chr2L	12461038	12461039	bun	0.7	0.2	0.45
chr2L	12461052	12461053	bun	0.3	0.2	0.25
chr2L	12461054	12461055	bun	0.3	0.2	0.25
chr2L	12461084	12461085	bun	0.2	0.3	0.25
chr2L	124674	124675	CG11455	0.8	0.5	0.65
chr2L	124806	124807	CG11455	1	0.5	0.75
chr2L	12508173	12508174	CR43051	2.9	0.8	1.85
chr2L	12508173	12508174	snoRNA:CG43051-a	2.9	0.8	1.85
chr2L	12508197	12508198	bun	1.1	0.7	0.9
chr2L	12508258	12508259	CR43051	1.4	0.8	1.1
chr2L	12508409	12508410	bun	1.7	1.3	1.5
chr2L	12516567	12516568	bun	12.5	4	8.25
chr2L	12516679	12516680	bun	4.3	3.1	3.7
chr2L	125261	125262	CG11455	1.6	1.6	1.6
chr2L	12690497	12690498	CG5525	0.8	0.6	0.7
chr2L	12690779	12690780	CG5525	1	0.8	0.9
chr2L	12690856	12690857	CG5525	1.1	2	1.55
chr2L	12691148	12691149	CG5525	0.9	0.6	0.75
chr2L	12697738	12697739	PICK1	3.8	3	3.4
chr2L	12698611	12698612	PICK1	3.1	5.6	4.35
chr2L	12698706	12698707	PICK1	2	4.3	3.15
chr2L	12706367	12706368	spict	3.3	2.3	2.8
chr2L	12706634	12706635	spict	4.3	4	4.15
chr2L	12708002	12708003	CG6180	0.3	0.4	0.35
chr2L	12708220	12708221	CG6180	0.4	1	0.7
chr2L	12708239	12708240	CG6180	0.3	0.9	0.6
chr2L	12708256	12708257	CG6180	0.3	0.4	0.35
chr2L	12708389	12708390	CG6180	0.3	0.3	0.3
chr2L	12708583	12708584	CG6180	0.3	1.6	0.95
chr2L	12709232	12709233	CG5787	1.6	1.8	1.7
chr2L	12713745	12713746	Pih1D1	1.1	0.8	0.95
chr2L	12715242	12715243	Pih1D1	3.3	1.7	2.5
chr2L	12738451	12738452	MRP	3.4	2.1	2.75
chr2L	12744042	12744043	MRP	1.8	1.1	1.45
chr2L	12817161	12817162	kek1	0.6	0.8	0.7
chr2L	12817171	12817172	kek1	0.5	1.4	0.95
chr2L	12817271	12817272	kek1	3	1.7	2.35
chr2L	12817507	12817508	kek1	1.7	1.9	1.8
chr2L	12817591	12817592	kek1	1.1	1.1	1.1
chr2L	12817626	12817627	kek1	1.1	1	1.05
chr2L	12818420	12818421	kek1	3.1	10	6.55
chr2L	12818586	12818587	kek1	1	1	1
chr2L	12818755	12818756	kek1	0.6	0.8	0.7
chr2L	12818812	12818813	kek1	0.6	0.6	0.6
chr2L	12818886	12818887	kek1	0.8	1.1	0.95
chr2L	12819401	12819402	kek1	2.1	2.4	2.25
chr2L	12820950	12820951	kek1	2.1	1.5	1.8
chr2L	12821395	12821396	kek1	1.8	4	2.9
chr2L	12821569	12821570	kek1	2	0.9	1.45
chr2L	12821626	12821627	kek1	0.7	0.7	0.7
chr2L	12821660	12821661	kek1	0.6	0.7	0.65
chr2L	12821662	12821663	kek1	0.9	0.98	0.94
chr2L	12821671	12821672	kek1	0.8	0.7	0.75
chr2L	12821722	12821723	kek1	1.1	1.9	1.5
chr2L	12821771	12821772	kek1	0.5	0.5	0.5
chr2L	12821798	12821799	kek1	0.6	2.1	1.35
chr2L	12821859	12821860	kek1	0.5	0.7	0.6
chr2L	12821888	12821889	kek1	0.4	0.5	0.45
chr2L	12821906	12821907	kek1	0.8	0.5	0.65
chr2L	12821972	12821973	kek1	1.5	0.4	0.95
chr2L	12822010	12822011	kek1	0.6	0.5	0.55
chr2L	12822085	12822086	kek1	0.5	1.5	1
chr2L	12822104	12822105	kek1	0.4	1.6	1
chr2L	12822113	12822114	kek1	0.6	1.4	1
chr2L	12822140	12822141	kek1	0.3	0.4	0.35
chr2L	12822141	12822142	kek1	0.8	0.3	0.55
chr2L	12822189	12822190	kek1	0.4	0.5	0.45
chr2L	12822248	12822249	kek1	0.2	0.4	0.3
chr2L	12822263	12822264	kek1	0.2	0.3	0.25
chr2L	12822292	12822293	kek1	0.9	1	0.95
chr2L	12822296	12822297	kek1	0.8	0.8	0.8
chr2L	12822323	12822324	kek1	0.8	0.4	0.6
chr2L	12822484	12822485	kek1	0.6	0.8	0.7
chr2L	12822506	12822507	kek1	0.6	0.3	0.45
chr2L	12822512	12822513	kek1	0.3	0.3	0.3
chr2L	12822514	12822515	kek1	0.5	0.6	0.55
chr2L	12822519	12822520	kek1	0.5	0.3	0.4
chr2L	12822520	12822521	kek1	0.3	0.3	0.3
chr2L	12822525	12822526	kek1	0.2	0.8	0.5
chr2L	12822567	12822568	kek1	0.4	0.4	0.4
chr2L	12822569	12822570	kek1	0.3	0.2	0.25
chr2L	12822574	12822575	kek1	0.4	0.5	0.45
chr2L	12822580	12822581	kek1	0.3	0.2	0.25
chr2L	12822582	12822583	kek1	0.2	0.2	0.2
chr2L	12822606	12822607	kek1	0.5	0.3	0.4
chr2L	12822681	12822682	kek1	0.4	0.8	0.6
chr2L	12822690	12822691	kek1	0.2	0.4	0.3
chr2L	1289632	1289633	robo3	16.7	10	13.35
chr2L	129053	129054	CG11455	1.3	0.7	1
chr2L	1294036	1294037	robo3	1.2	1.6	1.4
chr2L	1294227	1294228	robo3	2.9	1.92	2.41
chr2L	1294466	1294467	robo3	0.8	1.3	1.05
chr2L	1294502	1294503	robo3	1.2	0.8	1
chr2L	12978327	12978328	Vha68-2	0.4	0.4	0.4
chr2L	12993922	12993923	CG12404	1.4	1	1.2
chr2L	12997873	12997874	CG12404	1.4	4.4	2.9
chr2L	13000803	13000804	Vha68-1	0.6	0.6	0.6
chr2L	13000861	13000862	Vha68-1	1.3	0.4	0.85
chr2L	13000961	13000962	Vha68-1	0.3	0.3	0.3
chr2L	13001025	13001026	Vha68-1	0.35	0.3	0.32
chr2L	13001056	13001057	Vha68-1	0.2	0.2	0.2
chr2L	13001074	13001075	Vha68-1	0.2	0.3	0.25
chr2L	13001089	13001090	Vha68-1	0.2	0.4	0.3
chr2L	13001101	13001102	Vha68-1	0.5	0.3	0.4
chr2L	13001119	13001120	Vha68-1	0.3	0.3	0.3
chr2L	13001191	13001192	Vha68-1	0.1	0.3	0.2
chr2L	13002426	13002427	Vha68-1	0.57	0.65	0.61
chr2L	13013624	13013625	CG9934	3.1	1.8	2.45
chr2L	13013739	13013740	CG9934	5.1	1.5	3.3
chr2L	13013757	13013758	CG9934	4.3	1.5	2.9
chr2L	13013772	13013773	CG9934	1.4	3.8	2.6
chr2L	13014631	13014632	CG9934	2.8	2.5	2.65
chr2L	13015001	13015002	CG9934	4	3.3	3.65
chr2L	13020516	13020517	A16	3.3	2	2.65
chr2L	13020770	13020771	A16	3	4	3.5
chr2L	13022213	13022214	CG9932	0.7	0.6	0.65
chr2L	13022231	13022232	CG9932	0.6	1	0.8
chr2L	13022235	13022236	CG9932	0.6	0.5	0.55
chr2L	13022236	13022237	CG9932	0.6	0.5	0.55
chr2L	13022536	13022537	CG9932	0.5	0.6	0.55
chr2L	13022628	13022629	CG9932	1.2	0.7	0.95
chr2L	13022801	13022802	CG9932	1.1	0.9	1
chr2L	13023435	13023436	CG9932	1.5	1.1	1.3
chr2L	13142556	13142557	CG9928	0.1	0.2	0.15
chr2L	13142578	13142579	CG9928	0.2	0.2	0.2
chr2L	13142581	13142582	CG9928	0.1	0.2	0.15
chr2L	13142592	13142593	CG9928	0.1	0.1	0.1
chr2L	13142638	13142639	CG9928	0.2	0.25	0.22
chr2L	13142654	13142655	CG9928	0.3	0.3	0.3
chr2L	13142660	13142661	CG9928	0.2	0.1	0.15
chr2L	13142707	13142708	CG9928	0.1	0.1	0.1
chr2L	13142791	13142792	CG9928	0.12	0.1	0.11
chr2L	13142855	13142856	CG9928	0.1	0	0.05
chr2L	13142870	13142871	CG9928	0.1	0.1	0.1
chr2L	13142872	13142873	CG9928	0.3	0.1	0.2
chr2L	13142877	13142878	CG9928	0.1	0.1	0.1
chr2L	13163324	13163325	DnaJ-H	6.5	2.9	4.7
chr2L	13163347	13163348	DnaJ-H	0.5	0.6	0.55
chr2L	13163381	13163382	DnaJ-H	0.8	0.6	0.7
chr2L	13163426	13163427	DnaJ-H	0.6	0.7	0.65
chr2L	13164086	13164087	DnaJ-H	1.1	1.2	1.15
chr2L	13164424	13164425	DnaJ-H	0.4	0.8	0.6
chr2L	13164457	13164458	DnaJ-H	0.6	0.6	0.6
chr2L	13164760	13164761	DnaJ-H	0.6	0.5	0.55
chr2L	13169365	13169366	Sir2	1	1	1
chr2L	13169383	13169384	Sir2	2	2.3	2.15
chr2L	13177626	13177627	CG5439	8.3	4.8	6.55
chr2L	13180700	13180701	CG31849	5.6	6.3	5.95
chr2L	13183237	13183238	CG5287	3.4	2.9	3.15
chr2L	13185105	13185106	CG16974	0.5	3.1	1.8
chr2L	13185227	13185228	CG16974	0.4	0.5	0.45
chr2L	13185280	13185281	CG16974	0.3	0.3	0.3
chr2L	13186802	13186803	CG16974	3.3	1.1	2.2
chr2L	13194163	13194164	Edem2	16.7	9.1	12.9
chr2L	13195298	13195299	Edem2	8.3	2.9	5.6
chr2L	13196516	13196517	Edem2	1.4	3	2.2
chr2L	13198407	13198408	CG16972	11.1	22.2	16.65
chr2L	13209563	13209564	Pect	0.4	0.3	0.35
chr2L	13210377	13210378	Pect	0.25	0.3	0.28
chr2L	13210387	13210388	Pect	0.4	0.2	0.3
chr2L	13210450	13210451	Pect	0.3	0.3	0.3
chr2L	13210538	13210539	Pect	0.2	0.2	0.2
chr2L	13210661	13210662	Pect	1.7	3	2.35
chr2L	13210670	13210671	Pect	1.4	1.6	1.5
chr2L	13210721	13210722	Pect	0.5	0.3	0.4
chr2L	13210742	13210743	Pect	0.2	0.2	0.2
chr2L	13210750	13210751	Pect	0.5	0.2	0.35
chr2L	13210804	13210805	Pect	0.3	1.4	0.85
chr2L	13210812	13210813	Pect	0.9	0.5	0.7
chr2L	13212550	13212551	kek4	1.9	1.2	1.55
chr2L	13212598	13212599	kek4	1.8	1.5	1.65
chr2L	13212694	13212695	kek4	1.5	1.7	1.6
chr2L	13212766	13212767	kek4	1.4	1.7	1.55
chr2L	132161	132162	CG11455	1.3	0.3	0.8
chr2L	132161	132162	Gs1	1.3	0.3	0.8
chr2L	13216567	13216568	CG9426	1	1.8	1.4
chr2L	13216567	13216568	snRNA:U2:34ABb	1	1.8	1.4
chr2L	13216567	13216568	snRNA:U2:34ABc	1	1.8	1.4
chr2L	13216613	13216614	CG9426	0.9	1.6	1.25
chr2L	13216613	13216614	snRNA:U2:34ABb	0.9	1.6	1.25
chr2L	13216613	13216614	snRNA:U2:34ABc	0.9	1.6	1.25
chr2L	13216625	13216626	CG9426	3.6	1.1	2.35
chr2L	13216625	13216626	snRNA:U2:34ABb	3.6	1.1	2.35
chr2L	13216625	13216626	snRNA:U2:34ABc	3.6	1.1	2.35
chr2L	13216805	13216806	CG9426	2.5	2.3	2.4
chr2L	13216805	13216806	snRNA:U2:34ABb	2.5	2.3	2.4
chr2L	13216805	13216806	snRNA:U2:34ABc	2.5	2.3	2.4
chr2L	13217263	13217264	CG9426	2.2	1.1	1.65
chr2L	13217263	13217264	snRNA:U2:34ABb	2.2	1.1	1.65
chr2L	13217263	13217264	snRNA:U2:34ABc	2.2	1.1	1.65
chr2L	13217264	13217265	CG9426	5.6	2.2	3.9
chr2L	13217264	13217265	snRNA:U2:34ABb	5.6	2.2	3.9
chr2L	13217264	13217265	snRNA:U2:34ABc	5.6	2.2	3.9
chr2L	13218150	13218151	CG9426	4.2	5.9	5.05
chr2L	13218150	13218151	snRNA:U2:34ABb	4.2	5.9	5.05
chr2L	13218150	13218151	snRNA:U2:34ABc	4.2	5.9	5.05
chr2L	13221783	13221784	Ski6	14.3	10	12.15
chr2L	13221783	13221784	snRNA:U2:34ABb	14.3	10	12.15
chr2L	13221783	13221784	snRNA:U2:34ABc	14.3	10	12.15
chr2L	13223275	13223276	CG16812	2.2	2.4	2.3
chr2L	13223781	13223782	snRNA:U2:34ABb	1.9	1.3	1.6
chr2L	13223781	13223782	snRNA:U2:34ABc	1.9	1.3	1.6
chr2L	13224066	13224067	snRNA:U2:34ABb	1.6	2	1.8
chr2L	13224066	13224067	snRNA:U2:34ABc	1.6	2	1.8
chr2L	13236653	13236654	snRNA:U2:34ABb	0.3	0.1	0.2
chr2L	13236653	13236654	snRNA:U2:34ABc	0.3	0.1	0.2
chr2L	13236681	13236682	CG5867	0.3	0.2	0.25
chr2L	13236711	13236712	CG5867	0.3	0.3	0.3
chr2L	13238403	13238404	snRNA:U2:34ABb	0.3	0.1	0.2
chr2L	13238403	13238404	snRNA:U2:34ABc	0.3	0.1	0.2
chr2L	13238439	13238440	snRNA:U2:34ABb	0.5	0.2	0.35
chr2L	13238439	13238440	snRNA:U2:34ABc	0.5	0.2	0.35
chr2L	13238453	13238454	CG5867	0.4	0.2	0.3
chr2L	13238594	13238595	CG5867	0.3	0.1	0.2
chr2L	13238595	13238596	snRNA:U2:34ABb	0.3	0.2	0.25
chr2L	13238595	13238596	snRNA:U2:34ABc	0.3	0.2	0.25
chr2L	13238696	13238697	CG5867	0.4	0.3	0.35
chr2L	13238904	13238905	snRNA:U2:34ABb	0.5	0.2	0.35
chr2L	13238904	13238905	snRNA:U2:34ABc	0.5	0.2	0.35
chr2L	13239060	13239061	snRNA:U2:34ABb	0.3	0.3	0.3
chr2L	13239060	13239061	snRNA:U2:34ABc	0.3	0.3	0.3
chr2L	13239142	13239143	snRNA:U2:34ABb	0.3	0.2	0.25
chr2L	13239142	13239143	snRNA:U2:34ABc	0.3	0.2	0.25
chr2L	13239167	13239168	snRNA:U2:34ABb	0.7	0.1	0.4
chr2L	13239167	13239168	snRNA:U2:34ABc	0.7	0.1	0.4
chr2L	13239203	13239204	snRNA:U2:34ABb	0.3	0.1	0.2
chr2L	13239203	13239204	snRNA:U2:34ABc	0.3	0.1	0.2
chr2L	13240181	13240182	snRNA:U2:34ABb	1.3	0.2	0.75
chr2L	13240181	13240182	snRNA:U2:34ABc	1.3	0.2	0.75
chr2L	13240405	13240406	snRNA:U2:34ABb	1.6	0.5	1.05
chr2L	13240405	13240406	snRNA:U2:34ABc	1.6	0.5	1.05
chr2L	13240544	13240545	snRNA:U2:34ABb	2.1	0.5	1.3
chr2L	13240544	13240545	snRNA:U2:34ABc	2.1	0.5	1.3
chr2L	13240629	13240630	CG5945	2.4	0.2	1.3
chr2L	13240701	13240702	snRNA:U2:34ABb	1.6	0.2	0.9
chr2L	13240701	13240702	snRNA:U2:34ABc	1.6	0.2	0.9
chr2L	13240804	13240805	CG5945	1.4	0.2	0.8
chr2L	13240903	13240904	CG5945	1.2	0.4	0.8
chr2L	13241611	13241612	CG5945	1	0.2	0.6
chr2L	132480	132481	CG11455	0.7	0.7	0.7
chr2L	132480	132481	Gs1	0.7	0.7	0.7
chr2L	13288879	13288880	Uvrag	3.6	2.3	2.95
chr2L	13288966	13288967	CR44972	2.2	2.1	2.15
chr2L	13289383	13289384	Uvrag	3	3.3	3.15
chr2L	13300481	13300482	CG31729	1.3	2	1.65
chr2L	13300803	13300804	CG31729	3.15	1.1	2.12
chr2L	13301026	13301027	CG31729	0.9	0.8	0.85
chr2L	13301819	13301820	CG43778	0.5	0.8	0.65
chr2L	13301829	13301830	CG43778	1.1	0.8	0.95
chr2L	13301851	13301852	CG43778	4	3.3	3.65
chr2L	13301853	13301854	CG43778	15.3	5.7	10.5
chr2L	13301854	13301855	CG43778	14.5	13.8	14.15
chr2L	13301881	13301882	CG43778	0.9	1.3	1.1
chr2L	13301940	13301941	CG43778	0.3	0.7	0.5
chr2L	13301946	13301947	CG43778	0.3	0.7	0.5
chr2L	13301948	13301949	CG43778	0.3	0.4	0.35
chr2L	13301959	13301960	CG43778	0.8	1.7	1.25
chr2L	13302017	13302018	CG43778	0.4	0.5	0.45
chr2L	13302029	13302030	CG43778	0.4	0.5	0.45
chr2L	13302055	13302056	CG43778	0.4	0.92	0.66
chr2L	13302071	13302072	CG43778	0.5	0.5	0.5
chr2L	13302072	13302073	CG43778	11.9	9.9	10.9
chr2L	13302088	13302089	CG43778	0.5	0.5	0.5
chr2L	13302093	13302094	CG43778	0.5	0.5	0.5
chr2L	13302105	13302106	CG43778	0.5	0.6	0.55
chr2L	13302122	13302123	CG43778	0.4	0.5	0.45
chr2L	13302155	13302156	CG43778	0.5	0.7	0.6
chr2L	13302167	13302168	CG43778	0.6	0.5	0.55
chr2L	13302177	13302178	CG43778	0.4	0.5	0.45
chr2L	13302323	13302324	CG43778	1.4	1	1.2
chr2L	13302926	13302927	CG43778	6.7	1.1	3.9
chr2L	13303053	13303054	CG43778	2.9	7	4.95
chr2L	13303718	13303719	CG43778	10	3.2	6.6
chr2L	13305000	13305001	CG43778	50	10	30
chr2L	133476	133477	CG11455	0.3	0.5	0.4
chr2L	133476	133477	Gs1	0.3	0.5	0.4
chr2L	13349905	13349906	CG9395	4.3	1	2.65
chr2L	13349963	13349964	CG9395	0.8	1.8	1.3
chr2L	13350110	13350111	CG9395	1	1	1
chr2L	13350111	13350112	CG9395	1.7	1	1.35
chr2L	13350732	13350733	CG9395	0.9	1.2	1.05
chr2L	13350745	13350746	CG9395	12.7	4.5	8.6
chr2L	13350869	13350870	CG9395	1.3	1.6	1.45
chr2L	13350883	13350884	CG9395	4.2	1.4	2.8
chr2L	13350928	13350929	CG9395	2.9	2.5	2.7
chr2L	133589	133590	CG11455	0.3	0.4	0.35
chr2L	133589	133590	Gs1	0.3	0.4	0.35
chr2L	13360028	13360029	CG9377	0.3	0.2	0.25
chr2L	13360278	13360279	CG9377	0.3	0.4	0.35
chr2L	13360413	13360414	CG9377	0.1	0.2	0.15
chr2L	13361498	13361499	CG9377	0.1	0.2	0.15
chr2L	13361509	13361510	CG9377	0.5	0.3	0.4
chr2L	13361525	13361526	CG9377	0.4	0.6	0.5
chr2L	13363843	13363844	Nnp-1	1.1	1	1.05
chr2L	13363854	13363855	Nnp-1	4.7	1	2.85
chr2L	13363883	13363884	Nnp-1	1.4	1.6	1.5
chr2L	13366573	13366574	CG6523	0.7	0.6	0.65
chr2L	13369544	13369545	CG31855	1.3	1.3	1.3
chr2L	13369740	13369741	CG31855	1.5	1.1	1.3
chr2L	13369811	13369812	CG31855	2.3	2	2.15
chr2L	13370287	13370288	CG9306	1.1	4.8	2.95
chr2L	13370346	13370347	CG9306	0.2	0.6	0.4
chr2L	13370443	13370444	CG9306	0.5	0.3	0.4
chr2L	13370557	13370558	CG9306	0.3	0.4	0.35
chr2L	13370663	13370664	CG9306	0.45	0.25	0.35
chr2L	13370861	13370862	CG9306	0.4	0.2	0.3
chr2L	13370918	13370919	CG9306	0.1	0.1	0.1
chr2L	13370941	13370942	CG9306	0.1	0.1	0.1
chr2L	13370951	13370952	CG9306	0.1	0.2	0.15
chr2L	13371530	13371531	CG9305	4	3.1	3.55
chr2L	13371690	13371691	CG9305	2.7	2.6	2.65
chr2L	13371724	13371725	CG9305	2.9	4.2	3.55
chr2L	13375253	13375254	CG6565	3.8	5.9	4.85
chr2L	13375754	13375755	CG6565	1.7	1.7	1.7
chr2L	13375922	13375923	CG6565	1.2	1.6	1.4
chr2L	13376058	13376059	CG6565	4.6	1.6	3.1
chr2L	13376789	13376790	CG9302	2.7	2.4	2.55
chr2L	13380601	13380602	beta'COP	3.6	3.7	3.65
chr2L	13381996	13381997	beta'COP	1.2	1.2	1.2
chr2L	13382187	13382188	beta'COP	1.1	0.6	0.85
chr2L	13382784	13382785	loqs	1.5	2	1.75
chr2L	13382895	13382896	loqs	1.6	0.9	1.25
chr2L	13382946	13382947	loqs	10.6	2.03	6.31
chr2L	13383250	13383251	loqs	0.8	0.7	0.75
chr2L	13383459	13383460	loqs	1.4	0.7	1.05
chr2L	13383516	13383517	loqs	1.9	1.3	1.6
chr2L	13383740	13383741	loqs	1	1	1
chr2L	13384998	13384999	loqs	0.4	0.6	0.5
chr2L	13385040	13385041	loqs	0.5	0.6	0.55
chr2L	13385230	13385231	loqs	3.3	3.3	3.3
chr2L	13385262	13385263	loqs	0.4	0.5	0.45
chr2L	13385293	13385294	CR44599	0.4	0.4	0.4
chr2L	13385361	13385362	CR44599	0.6	0.6	0.6
chr2L	13385387	13385388	loqs	0.7	1.3	1
chr2L	13385397	13385398	loqs	0.5	0.7	0.6
chr2L	13385401	13385402	loqs	0.5	0.7	0.6
chr2L	13385581	13385582	loqs	0.8	0.4	0.6
chr2L	13385620	13385621	loqs	3.3	3	3.15
chr2L	13385664	13385665	loqs	1.2	2.3	1.75
chr2L	13385665	13385666	loqs	1.8	2.3	2.05
chr2L	13386769	13386770	CG9293	2.2	1.8	2
chr2L	13386829	13386830	CG9293	2.5	1.6	2.05
chr2L	133869	133870	CG11455	1.38	0.8	1.09
chr2L	133869	133870	Gs1	1.38	0.8	1.09
chr2L	133900	133901	CG11455	0.2	0.3	0.25
chr2L	133900	133901	Gs1	0.2	0.3	0.25
chr2L	13393552	13393553	CG7099	10	11.1	10.55
chr2L	13393677	13393678	CG7099	4.8	5.3	5.05
chr2L	13394197	13394198	RpL24	0.5	0.1	0.3
chr2L	13394198	13394199	RpL24	0.5	0.4	0.45
chr2L	13394242	13394243	RpL24	0.28	0.18	0.23
chr2L	13394255	13394256	RpL24	0.48	0.2	0.34
chr2L	13394265	13394266	RpL24	0.2	0.1	0.15
chr2L	13394275	13394276	RpL24	0.3	0.1	0.2
chr2L	13394279	13394280	RpL24	0.1	0.1	0.1
chr2L	13394304	13394305	RpL24	0.1	0.1	0.1
chr2L	13395070	13395071	RpL24	0.1	0.1	0.1
chr2L	133975	133976	CG11455	0.2	0.6	0.4
chr2L	133975	133976	Gs1	0.2	0.6	0.4
chr2L	133990	133991	CG11455	0.2	0.3	0.25
chr2L	133990	133991	Gs1	0.2	0.3	0.25
chr2L	134059	134060	CG11455	0.22	0.7	0.46
chr2L	134059	134060	Gs1	0.22	0.7	0.46
chr2L	134087	134088	CG11455	0.4	0.4	0.4
chr2L	134087	134088	Gs1	0.4	0.4	0.4
chr2L	134099	134100	CG11455	0.2	0.5	0.35
chr2L	134099	134100	Gs1	0.2	0.5	0.35
chr2L	134132	134133	CG11455	0.2	0.3	0.25
chr2L	134132	134133	Gs1	0.2	0.3	0.25
chr2L	134338	134339	CG11455	0.6	1.8	1.2
chr2L	134338	134339	Gs1	0.6	1.8	1.2
chr2L	134394	134395	CG11455	0.6	4.3	2.45
chr2L	134394	134395	Gs1	0.6	4.3	2.45
chr2L	13444300	13444301	CG42784	2.2	1.5	1.85
chr2L	13444921	13444922	CG42784	1.9	2.2	2.05
chr2L	13486297	13486298	CG42784	3.2	3	3.1
chr2L	13487047	13487048	CG42784	4.2	2.9	3.55
chr2L	13487902	13487903	CG42784	0.7	0.9	0.8
chr2L	13487958	13487959	CG42784	1.6	1.7	1.65
chr2L	13488062	13488063	CG42784	0.8	0.9	0.85
chr2L	13488177	13488178	CG42784	0.2	0.3	0.25
chr2L	13488183	13488184	CG42784	0.2	0.3	0.25
chr2L	13488188	13488189	CG42784	0.4	0.7	0.55
chr2L	13488192	13488193	CG42784	0.2	0.3	0.25
chr2L	13488204	13488205	CG42784	0.7	0.9	0.8
chr2L	13488228	13488229	CG42784	0.2	0.4	0.3
chr2L	13488250	13488251	CG42784	0.2	0.3	0.25
chr2L	13488299	13488300	CG42784	0.2	0.3	0.25
chr2L	13488446	13488447	CG42784	0.6	1	0.8
chr2L	13488460	13488461	CG42784	0.7	0.5	0.6
chr2L	13488463	13488464	CG42784	0.6	0.4	0.5
chr2L	13488479	13488480	CG42784	0.3	0.5	0.4
chr2L	13488543	13488544	CG42784	0.4	0.7	0.55
chr2L	13488629	13488630	CG42784	0.3	0.7	0.5
chr2L	13488797	13488798	CG42784	0.5	1.4	0.95
chr2L	13488903	13488904	CG42784	0.6	0.9	0.75
chr2L	13488916	13488917	CG42784	0.7	0.5	0.6
chr2L	13489616	13489617	CG42784	3.2	2.6	2.9
chr2L	13491154	13491155	CG42784	1.2	3.4	2.3
chr2L	13491277	13491278	CG42784	1.9	2.4	2.15
chr2L	13499801	13499802	CG42784	0.4	0.4	0.4
chr2L	13499828	13499829	CG42784	0.68	0.3	0.49
chr2L	13499849	13499850	CG42784	0.3	0.3	0.3
chr2L	13499856	13499857	CG42784	0.3	0.3	0.3
chr2L	13499912	13499913	CG42784	0.6	0.4	0.5
chr2L	13500182	13500183	CG42784	0.2	0.3	0.25
chr2L	13500188	13500189	CG42784	0.2	0.6	0.4
chr2L	13500189	13500190	CG42784	0.2	0.3	0.25
chr2L	13500219	13500220	CG42784	0.2	0.3	0.25
chr2L	13500298	13500299	CG42784	0.3	0.6	0.45
chr2L	13500320	13500321	CG42784	0.6	1.5	1.05
chr2L	13501021	13501022	B4	0.4	0.6	0.5
chr2L	13501097	13501098	B4	0.4	1.4	0.9
chr2L	13501108	13501109	B4	0.4	0.5	0.45
chr2L	13501118	13501119	B4	1.73	1.12	1.43
chr2L	13501127	13501128	B4	2.3	1.4	1.85
chr2L	13501136	13501137	B4	0.5	0.7	0.6
chr2L	13501185	13501186	B4	1.2	1.3	1.25
chr2L	13501491	13501492	B4	0.8	0.9	0.85
chr2L	13501666	13501667	B4	1.6	0.7	1.15
chr2L	13501845	13501846	B4	1.9	2.3	2.1
chr2L	13502543	13502544	B4	2	2.38	2.19
chr2L	13502549	13502550	B4	2.7	5.1	3.9
chr2L	13502550	13502551	B4	2.8	2.6	2.7
chr2L	13502665	13502666	B4	4.8	6.3	5.55
chr2L	13502900	13502901	B4	6.7	2.8	4.75
chr2L	13502976	13502977	B4	2.2	1.6	1.9
chr2L	13503287	13503288	B4	6.7	7.3	7
chr2L	13503306	13503307	B4	12.5	5.7	9.1
chr2L	13503390	13503391	B4	3.3	6.3	4.8
chr2L	13503953	13503954	B4	7.1	2.9	5
chr2L	1360155	1360156	NLaz	0.6	0.5	0.55
chr2L	1360300	1360301	NLaz	0.7	0.5	0.6
chr2L	13610485	13610486	kuz	25	12.5	18.75
chr2L	1361703	1361704	NLaz	0.6	0.3	0.45
chr2L	13637770	13637771	kuz	2.2	1.4	1.8
chr2L	13637961	13637962	kuz	0.9	2.6	1.75
chr2L	13638697	13638698	kuz	1.6	1.7	1.65
chr2L	13771628	13771629	TM9SF4	3.8	2.4	3.1
chr2L	13773472	13773473	TM9SF4	2.3	1.1	1.7
chr2L	13773708	13773709	TM9SF4	1.5	0.6	1.05
chr2L	13773784	13773785	TM9SF4	3.3	1.1	2.2
chr2L	13775967	13775968	CG9008	5	7.1	6.05
chr2L	13781102	13781103	p38b	3.6	2	2.8
chr2L	13781981	13781982	p38b	5.08	6.23	5.66
chr2L	13782248	13782249	p38b	1.6	2.9	2.25
chr2L	13782627	13782628	CG16890	2.9	4.3	3.6
chr2L	13790083	13790084	CG31731	1.8	1.8	1.8
chr2L	13790341	13790342	CG31731	1.3	1.5	1.4
chr2L	13799120	13799121	Sec71	2.4	4.7	3.55
chr2L	13808882	13808883	CAH1	0.2	0.2	0.2
chr2L	13809311	13809312	CAH1	0.7	0.4	0.55
chr2L	13809873	13809874	adat	0.1	0.2	0.15
chr2L	13809876	13809877	CAH1	0.3	0.2	0.25
chr2L	13809898	13809899	adat	0.2	0.2	0.2
chr2L	13809910	13809911	adat	0.2	0.3	0.25
chr2L	13809981	13809982	adat	0.5	0.7	0.6
chr2L	13818385	13818386	Sos	8	2.7	5.35
chr2L	13823339	13823340	b	1.9	2	1.95
chr2L	13823663	13823664	b	1.1	1.4	1.25
chr2L	13824133	13824134	tam	12.5	10	11.25
chr2L	13828064	13828065	Arpc1	1.3	1.3	1.3
chr2L	13828141	13828142	Arpc1	0.6	0.7	0.65
chr2L	13828190	13828191	Arpc1	1.2	0.6	0.9
chr2L	13828285	13828286	Arpc1	0.3	0.4	0.35
chr2L	13828514	13828515	Arpc1	0.6	0.6	0.6
chr2L	13829117	13829118	Arpc1	1.2	0.6	0.9
chr2L	13829257	13829258	Arpc1	0.5	0.4	0.45
chr2L	13829443	13829444	Arpc1	0.4	0.5	0.45
chr2L	13829578	13829579	Arpc1	3.2	1.3	2.25
chr2L	13831276	13831277	Orc5	18.2	10	14.1
chr2L	13832156	13832157	CG33649	1.7	2.5	2.1
chr2L	13832156	13832157	DNApol-gamma35	1.7	2.5	2.1
chr2L	13832161	13832162	CG33649	1.6	1.2	1.4
chr2L	13832161	13832162	DNApol-gamma35	1.6	1.2	1.4
chr2L	13832339	13832340	CG33649	1.1	1	1.05
chr2L	13832339	13832340	DNApol-gamma35	1.1	1	1.05
chr2L	13832547	13832548	CG33649	3.7	2.5	3.1
chr2L	13832547	13832548	DNApol-gamma35	3.7	2.5	3.1
chr2L	13832799	13832800	CG33649	2.5	2	2.25
chr2L	13832799	13832800	DNApol-gamma35	2.5	2	2.25
chr2L	13833619	13833620	RpII33	4.8	2.7	3.75
chr2L	13833916	13833917	RpII33	2.4	2.7	2.55
chr2L	13834959	13834960	mRpS23	3	1.3	2.15
chr2L	13840851	13840852	CG33307	0.9	0.6	0.75
chr2L	13840894	13840895	CG33307	0.5	0.4	0.45
chr2L	13840901	13840902	CenG1A	0.4	0.3	0.35
chr2L	13840907	13840908	CG33307	0.4	1.4	0.9
chr2L	13840929	13840930	CG33307	0.9	1	0.95
chr2L	13840940	13840941	CG33307	0.4	0.3	0.35
chr2L	13841120	13841121	CG33307	0.6	0.4	0.5
chr2L	13841128	13841129	CG33307	1.6	1.1	1.35
chr2L	13841265	13841266	CG33307	1.2	0.6	0.9
chr2L	13841347	13841348	CG33307	0.5	0.8	0.65
chr2L	13841453	13841454	CenG1A	2.6	0.8	1.7
chr2L	13897477	13897478	CenG1A	9.45	3.6	6.52
chr2L	13898579	13898580	CenG1A	1.6	2.8	2.2
chr2L	13899076	13899077	Smg5	0.8	0.5	0.65
chr2L	13899293	13899294	Smg5	1.8	1.3	1.55
chr2L	13899367	13899368	Smg5	0.7	0.9	0.8
chr2L	13899570	13899571	Smg5	1	0.9	0.95
chr2L	13907058	13907059	Ance	5.6	2	3.8
chr2L	13908372	13908373	Ance	1.5	1.1	1.3
chr2L	13930756	13930757	CG42711	4.3	1.8	3.05
chr2L	13930792	13930793	CG42711	1.3	2.7	2
chr2L	13931208	13931209	Ance-3	2.9	2.9	2.9
chr2L	13965072	13965073	NimB2	0.4	0.3	0.35
chr2L	13965166	13965167	NimB2	0.3	0.3	0.3
chr2L	13965247	13965248	NimB2	0.2	0.2	0.2
chr2L	13965513	13965514	NimB2	0.3	0.3	0.3
chr2L	13965547	13965548	NimB2	0.3	0.3	0.3
chr2L	13965568	13965569	NimB2	0.4	0.3	0.35
chr2L	13965793	13965794	NimB2	0.4	0.8	0.6
chr2L	13965854	13965855	NimB2	0.3	0.7	0.5
chr2L	13966904	13966905	NimB2	1.1	1.7	1.4
chr2L	13970715	13970716	NimB5	1.8	2.2	2
chr2L	13974506	13974507	NimC1	0.7	0.6	0.65
chr2L	13975666	13975667	NimC1	4.2	1.6	2.9
chr2L	13975760	13975761	NimC1	5.1	2.1	3.6
chr2L	13977493	13977494	Cyp28a5	0.8	0.7	0.75
chr2L	13977497	13977498	Cyp28a5	0.8	0.6	0.7
chr2L	13978051	13978052	Cyp28a5	1.1	1	1.05
chr2L	13978252	13978253	Cyp28a5	1.5	0.5	1
chr2L	13978954	13978955	Cyp28a5	0.3	0.3	0.3
chr2L	13979513	13979514	Cyp28a5	2.5	3.2	2.85
chr2L	14018381	14018382	bgm	1.6	1.1	1.35
chr2L	14018787	14018788	bgm	1.1	0.8	0.95
chr2L	14061056	14061057	nAChRalpha5	1.2	1.2	1.2
chr2L	14061568	14061569	nAChRalpha5	1.1	1.3	1.2
chr2L	14062248	14062249	nAChRalpha5	3.8	1.3	2.55
chr2L	14077176	14077177	nAChRalpha5	2.7	1.2	1.95
chr2L	14083276	14083277	nAChRalpha5	3	2	2.5
chr2L	14083488	14083489	nAChRalpha5	0.7	1.1	0.9
chr2L	14083518	14083519	nAChRalpha5	1	1.3	1.15
chr2L	14084941	14084942	nAChRalpha5	0.7	1	0.85
chr2L	14084990	14084991	nAChRalpha5	1.6	0.7	1.15
chr2L	14085066	14085067	nAChRalpha5	0.9	1.3	1.1
chr2L	14085465	14085466	nAChRalpha5	0.9	2	1.45
chr2L	14085469	14085470	nAChRalpha5	0.9	1	0.95
chr2L	14086394	14086395	nAChRalpha5	4	3.6	3.8
chr2L	14086733	14086734	nAChRalpha5	1.9	3.6	2.75
chr2L	14088042	14088043	nAChRalpha5	0.6	0.6	0.6
chr2L	14088426	14088427	nAChRalpha5	3.8	8.3	6.05
chr2L	14088517	14088518	nAChRalpha5	1.1	0.5	0.8
chr2L	14088567	14088568	nAChRalpha5	0.9	0.5	0.7
chr2L	14088579	14088580	nAChRalpha5	0.5	0.5	0.5
chr2L	14088817	14088818	nAChRalpha5	1.1	0.4	0.75
chr2L	14088949	14088950	nAChRalpha5	1.3	1.9	1.6
chr2L	14089188	14089189	nAChRalpha5	0.4	0.6	0.5
chr2L	14089194	14089195	nAChRalpha5	0.4	0.4	0.4
chr2L	14089285	14089286	nAChRalpha5	0.85	0.62	0.74
chr2L	14089485	14089486	nAChRalpha5	0.3	0.3	0.3
chr2L	14089545	14089546	nAChRalpha5	0.2	0.3	0.25
chr2L	14089564	14089565	nAChRalpha5	0.2	0.3	0.25
chr2L	14089565	14089566	nAChRalpha5	0.2	0.3	0.25
chr2L	14089575	14089576	nAChRalpha5	0.3	0.3	0.3
chr2L	14089583	14089584	nAChRalpha5	0.5	0.6	0.55
chr2L	14089590	14089591	nAChRalpha5	0.2	0.7	0.45
chr2L	14089607	14089608	nAChRalpha5	0.3	0.2	0.25
chr2L	14089608	14089609	nAChRalpha5	0.3	0.2	0.25
chr2L	14089626	14089627	nAChRalpha5	0.2	0.2	0.2
chr2L	14089638	14089639	nAChRalpha5	0.3	0.5	0.4
chr2L	14089645	14089646	nAChRalpha5	0.4	0.3	0.35
chr2L	14089653	14089654	nAChRalpha5	0.2	0.2	0.2
chr2L	14089696	14089697	nAChRalpha5	0.7	0.9	0.8
chr2L	14090029	14090030	nAChRalpha5	0.4	1.4	0.9
chr2L	14090408	14090409	nAChRalpha5	0.4	0.7	0.55
chr2L	14090772	14090773	nAChRalpha5	1.9	1.3	1.6
chr2L	14090861	14090862	nAChRalpha5	1.2	2.8	2
chr2L	14091701	14091702	nAChRalpha5	1	0.8	0.9
chr2L	14092288	14092289	nAChRalpha5	0.6	0.6	0.6
chr2L	14092333	14092334	nAChRalpha5	0.6	0.5	0.55
chr2L	14092365	14092366	nAChRalpha5	0.4	0.7	0.55
chr2L	14092477	14092478	nAChRalpha5	0.4	0.5	0.45
chr2L	14092602	14092603	nAChRalpha5	1.5	0.5	1
chr2L	14092657	14092658	nAChRalpha5	0.4	0.5	0.45
chr2L	14092671	14092672	nAChRalpha5	0.4	1	0.7
chr2L	14092687	14092688	nAChRalpha5	1.2	0.5	0.85
chr2L	14092847	14092848	nAChRalpha5	2.7	2.4	2.55
chr2L	14092887	14092888	nAChRalpha5	1.9	0.6	1.25
chr2L	14092912	14092913	nAChRalpha5	0.3	0.4	0.35
chr2L	14092924	14092925	nAChRalpha5	0.3	1.2	0.75
chr2L	14092937	14092938	nAChRalpha5	1	1.5	1.25
chr2L	14092989	14092990	nAChRalpha5	0.2	0.2	0.2
chr2L	14092999	14093000	nAChRalpha5	0.2	0.3	0.25
chr2L	14093010	14093011	nAChRalpha5	0.2	0.2	0.2
chr2L	14093036	14093037	nAChRalpha5	0.2	0.3	0.25
chr2L	14093065	14093066	nAChRalpha5	0.2	0.3	0.25
chr2L	14093074	14093075	nAChRalpha5	0.2	0.2	0.2
chr2L	14093075	14093076	nAChRalpha5	0.2	0.2	0.2
chr2L	14093096	14093097	nAChRalpha5	2.7	1.6	2.15
chr2L	14093107	14093108	nAChRalpha5	0.2	0.3	0.25
chr2L	14093179	14093180	nAChRalpha5	0.6	0.4	0.5
chr2L	14093180	14093181	nAChRalpha5	0.3	0.4	0.35
chr2L	14093183	14093184	nAChRalpha5	2.7	2	2.35
chr2L	14093265	14093266	nAChRalpha5	0.3	0.2	0.25
chr2L	14093266	14093267	nAChRalpha5	0.2	0.4	0.3
chr2L	14093283	14093284	nAChRalpha5	0.52	0.78	0.65
chr2L	14093285	14093286	nAChRalpha5	0.7	0.2	0.45
chr2L	14093293	14093294	nAChRalpha5	0.65	0.4	0.52
chr2L	14093294	14093295	nAChRalpha5	0.2	0.3	0.25
chr2L	14093392	14093393	nAChRalpha5	0.4	1	0.7
chr2L	14093412	14093413	nAChRalpha5	0.4	1	0.7
chr2L	14093451	14093452	nAChRalpha5	0.7	0.4	0.55
chr2L	14093507	14093508	nAChRalpha5	0.3	0.2	0.25
chr2L	14093675	14093676	nAChRalpha5	0.8	0.4	0.6
chr2L	14093697	14093698	nAChRalpha5	0.5	0.6	0.55
chr2L	14093824	14093825	nAChRalpha5	1.7	0.9	1.3
chr2L	14094085	14094086	nAChRalpha5	0.6	0.7	0.65
chr2L	14094198	14094199	nAChRalpha5	0.6	0.7	0.65
chr2L	14094283	14094284	nAChRalpha5	0.4	0.6	0.5
chr2L	14108153	14108154	CG15293	0.4	0.2	0.3
chr2L	14108192	14108193	CG15293	0.3	0.4	0.35
chr2L	14108194	14108195	CG15293	0.1	0.1	0.1
chr2L	14108366	14108367	CG15293	0.4	0.2	0.3
chr2L	14108503	14108504	CG15293	0.4	0.2	0.3
chr2L	14108594	14108595	CG15293	0.2	0.2	0.2
chr2L	14108680	14108681	CG15293	0.8	0.5	0.65
chr2L	14108731	14108732	CG15293	0.2	0.2	0.2
chr2L	14108791	14108792	CG15293	0.2	0.2	0.2
chr2L	14109037	14109038	CG15293	0.3	0.3	0.3
chr2L	14109745	14109746	CG31769	0.7	1.8	1.25
chr2L	14109869	14109870	CG31769	0.4	0.4	0.4
chr2L	14110037	14110038	CG31769	1.2	0.7	0.95
chr2L	14110062	14110063	CG31769	0.8	0.7	0.75
chr2L	14110100	14110101	CG31769	0.8	0.6	0.7
chr2L	14110229	14110230	CG31769	1.5	0.9	1.2
chr2L	14110347	14110348	CG31769	1.1	0.7	0.9
chr2L	141297	141298	CG11455	0.7	0.6	0.65
chr2L	141315	141316	CG11455	0.8	2.1	1.45
chr2L	141396	141397	CG11455	1.4	0.6	1
chr2L	141539	141540	CG31974	1.8	0.6	1.2
chr2L	14159401	14159402	CG17341	4.3	2.9	3.6
chr2L	14159654	14159655	CG17341	2	2.3	2.15
chr2L	14160173	14160174	CG17341	4	5	4.5
chr2L	141694	141695	CG31974	0.6	0.5	0.55
chr2L	141719	141720	CG11455	0.8	0.7	0.75
chr2L	141844	141845	CG31974	0.7	0.7	0.7
chr2L	14184815	14184816	Dyrk2	0.7	0.6	0.65
chr2L	14184825	14184826	Dyrk2	0.9	1.1	1
chr2L	14184840	14184841	Dyrk2	8.1	1.1	4.6
chr2L	14184864	14184865	Dyrk2	0.7	0.8	0.75
chr2L	14185117	14185118	Dyrk2	3.2	3.3	3.25
chr2L	14185216	14185217	Dyrk2	0.8	1	0.9
chr2L	14185226	14185227	Dyrk2	2	2.4	2.2
chr2L	14185442	14185443	Dyrk2	1	0.8	0.9
chr2L	14186630	14186631	Dyrk2	3.3	2.1	2.7
chr2L	14187085	14187086	Dyrk2	5.9	3.2	4.55
chr2L	14188892	14188893	Dyrk2	7.5	3.8	5.65
[truncated: 64,183 more rows]

## Sheet: Del cIDR Brain
chrom	start	end	Gene	Replicate 1 Edit Percentage	Replicate 2 Edit Percentage	Average Edit Percentage
chr2L	10004555	10004556	CR44873	2.4	1.5	1.95
chr2L	10008063	10008064	CG4747	1.8	0.7	1.25
chr2L	10008249	10008250	CG4747	2.4	1.7	2.05
chr2L	10008617	10008618	CG4747	1.1	0.5	0.8
chr2L	10008693	10008694	CG4747	0.5	0.9	0.7
chr2L	10010871	10010872	Trp1	0.5	0.4	0.45
chr2L	10011918	10011919	Trp1	1.3	1.1	1.2
chr2L	10012502	10012503	Trp1	0.6	0.5	0.55
chr2L	10012538	10012539	Trp1	0.5	0.5	0.5
chr2L	10012615	10012616	Trp1	0.6	0.5	0.55
chr2L	10012945	10012946	Trp1	0.5	0.5	0.5
chr2L	100784	100785	Zir	1.4	1	1.2
chr2L	1008468	1008469	IA-2	0.3	0.1	0.2
chr2L	1008583	1008584	IA-2	0.2	0.2	0.2
chr2L	1008649	1008650	IA-2	0.2	0.1	0.15
chr2L	1008687	1008688	IA-2	0.6	0.8	0.7
chr2L	1008688	1008689	IA-2	0.8	0.7	0.75
chr2L	1008689	1008690	IA-2	0.9	1	0.95
chr2L	1008691	1008692	IA-2	0.2	0.2	0.2
chr2L	1008710	1008711	IA-2	0.1	0.1	0.1
chr2L	1008735	1008736	IA-2	1.3	0.7	1
chr2L	1008737	1008738	IA-2	0.3	0.1	0.2
chr2L	1008746	1008747	IA-2	0.2	0.1	0.15
chr2L	1008752	1008753	IA-2	0.2	0.1	0.15
chr2L	1008759	1008760	IA-2	0.2	0.1	0.15
chr2L	1008864	1008865	IA-2	1.2	1.1	1.15
chr2L	1008928	1008929	IA-2	0.2	0.3	0.25
chr2L	1009172	1009173	IA-2	0.5	0.2	0.35
chr2L	1009220	1009221	IA-2	0.3	0.7	0.5
chr2L	100924	100925	Zir	1.3	1	1.15
chr2L	1009414	1009415	IA-2	0.4	0.2	0.3
chr2L	1009440	1009441	IA-2	4.4	5.6	5
chr2L	1009682	1009683	IA-2	0.2	0.3	0.25
chr2L	1009732	1009733	IA-2	0.6	0.3	0.45
chr2L	1009783	1009784	IA-2	0.4	0.3	0.35
chr2L	1009818	1009819	IA-2	0.1	0.1	0.1
chr2L	1009833	1009834	IA-2	0.1	0	0.05
chr2L	1009834	1009835	IA-2	0.3	0.2	0.25
chr2L	1009839	1009840	IA-2	0.2	0.2	0.2
chr2L	1009860	1009861	IA-2	0.08	0.1	0.09
chr2L	1009876	1009877	IA-2	0.1	0.1	0.1
chr2L	1009878	1009879	IA-2	0.1	0.1	0.1
chr2L	1009914	1009915	IA-2	0.1	0.1	0.1
chr2L	1009915	1009916	IA-2	0.1	0	0.05
chr2L	1009932	1009933	IA-2	0.1	0.1	0.1
chr2L	1009941	1009942	IA-2	0.18	0.02	0.1
chr2L	1009945	1009946	IA-2	0	0.1	0.05
chr2L	1009973	1009974	IA-2	0.28	0.52	0.4
chr2L	1009993	1009994	IA-2	0	0	0
chr2L	1009994	1009995	IA-2	0.15	0.1	0.12
chr2L	1010011	1010012	IA-2	0.1	0.1	0.1
chr2L	1010018	1010019	IA-2	0.1	0.02	0.06
chr2L	1010029	1010030	IA-2	0	0.1	0.05
chr2L	1010033	1010034	IA-2	0	0	0
chr2L	1010034	1010035	IA-2	0	0.1	0.05
chr2L	1010047	1010048	IA-2	0.1	0	0.05
chr2L	1010052	1010053	IA-2	0.1	0.1	0.1
chr2L	1010058	1010059	IA-2	0.1	0	0.05
chr2L	1010060	1010061	IA-2	0	0.1	0.05
chr2L	1010062	1010063	IA-2	0.1	0.1	0.1
chr2L	1010070	1010071	IA-2	0	0	0
chr2L	1010094	1010095	IA-2	0.08	0	0.04
chr2L	1010096	1010097	IA-2	0	0.1	0.05
chr2L	1010125	1010126	IA-2	0	0	0
chr2L	1010151	1010152	IA-2	0	0	0
chr2L	1010271	1010272	IA-2	0.08	0	0.04
chr2L	1010357	1010358	IA-2	0	0	0
chr2L	1010383	1010384	IA-2	0.1	0.02	0.06
chr2L	1010384	1010385	IA-2	0.1	0	0.05
chr2L	1010423	1010424	IA-2	0.02	0	0.01
chr2L	1010424	1010425	IA-2	0.1	0.1	0.1
chr2L	1010439	1010440	IA-2	0.08	0.02	0.05
chr2L	1010451	1010452	IA-2	0.1	0.1	0.1
chr2L	1010485	1010486	IA-2	0	0.02	0.01
chr2L	1010520	1010521	IA-2	0.1	0.1	0.1
chr2L	1010585	1010586	IA-2	0.1	0.1	0.1
chr2L	1010640	1010641	IA-2	0	0	0
chr2L	1011162	1011163	IA-2	0.2	0.3	0.25
chr2L	1011315	1011316	IA-2	0.02	0.02	0.02
chr2L	1011344	1011345	IA-2	0.1	0.1	0.1
chr2L	1011346	1011347	IA-2	0	0.05	0.02
chr2L	1011352	1011353	IA-2	0.05	0.02	0.04
chr2L	1011355	1011356	IA-2	0	0.1	0.05
chr2L	1011372	1011373	IA-2	0.1	0	0.05
chr2L	1011383	1011384	IA-2	0	0.05	0.02
chr2L	1011390	1011391	IA-2	0.05	0	0.02
chr2L	1011399	1011400	IA-2	0.2	0.1	0.15
chr2L	1011402	1011403	IA-2	0.2	0.1	0.15
chr2L	1011403	1011404	IA-2	0.1	0.2	0.15
chr2L	1011404	1011405	IA-2	0.1	0.1	0.1
chr2L	1011408	1011409	IA-2	0.1	0.1	0.1
chr2L	1011410	1011411	IA-2	0.2	0.1	0.15
chr2L	1011411	1011412	IA-2	0.1	0.1	0.1
chr2L	1011415	1011416	IA-2	0.1	0.1	0.1
chr2L	1011416	1011417	IA-2	0.1	0.1	0.1
chr2L	1011421	1011422	IA-2	0.1	0.1	0.1
chr2L	1011427	1011428	IA-2	0.2	0.18	0.19
chr2L	1011429	1011430	IA-2	0.18	0.1	0.14
chr2L	1011439	1011440	IA-2	0.2	0.1	0.15
chr2L	1011443	1011444	IA-2	0.1	0.1	0.1
chr2L	1011479	1011480	IA-2	0.1	0	0.05
chr2L	1011480	1011481	IA-2	0.1	0.1	0.1
chr2L	1011482	1011483	IA-2	0.8	0.7	0.75
chr2L	1011484	1011485	IA-2	0.1	0.1	0.1
chr2L	1011490	1011491	IA-2	0.1	0	0.05
chr2L	1011495	1011496	IA-2	0	0.1	0.05
chr2L	1011502	1011503	IA-2	0.1	0.1	0.1
chr2L	1011511	1011512	IA-2	0.1	0.02	0.06
chr2L	1011517	1011518	IA-2	0.1	0.1	0.1
chr2L	1011526	1011527	IA-2	0.1	0	0.05
chr2L	1011542	1011543	IA-2	0.18	0.18	0.18
chr2L	1011544	1011545	IA-2	0.1	0	0.05
chr2L	1011548	1011549	IA-2	0	0.1	0.05
chr2L	1011550	1011551	IA-2	0.3	0.2	0.25
chr2L	1011556	1011557	IA-2	0.1	0.2	0.15
chr2L	1011569	1011570	IA-2	0.1	0.1	0.1
chr2L	1011581	1011582	IA-2	0.1	0.1	0.1
chr2L	1011588	1011589	IA-2	0.1	0	0.05
chr2L	1011594	1011595	IA-2	0.1	0	0.05
chr2L	1011596	1011597	IA-2	0	0.1	0.05
chr2L	1011602	1011603	IA-2	0	0	0
chr2L	1011604	1011605	IA-2	0.1	0.1	0.1
chr2L	1011615	1011616	IA-2	0	0	0
chr2L	1011617	1011618	IA-2	0	0.08	0.04
chr2L	1011621	1011622	IA-2	0.02	0.08	0.05
chr2L	1011623	1011624	IA-2	0.1	0	0.05
chr2L	1011631	1011632	IA-2	0.02	0.08	0.05
chr2L	1011636	1011637	IA-2	0.1	0	0.05
chr2L	1011637	1011638	IA-2	0.18	0.12	0.15
chr2L	1011651	1011652	IA-2	0.05	0.05	0.05
chr2L	1011656	1011657	IA-2	0	0.1	0.05
chr2L	1011657	1011658	IA-2	0	0	0
chr2L	1011664	1011665	IA-2	0.08	0.1	0.09
chr2L	1011668	1011669	IA-2	0	0	0
chr2L	1011669	1011670	IA-2	0	0.05	0.02
chr2L	1011675	1011676	IA-2	0	0.1	0.05
chr2L	1011682	1011683	IA-2	0.1	0	0.05
chr2L	1011683	1011684	IA-2	0	0	0
chr2L	1011685	1011686	IA-2	0	0	0
chr2L	1011688	1011689	IA-2	0	0	0
chr2L	1011695	1011696	IA-2	0.1	0	0.05
chr2L	1011699	1011700	IA-2	0	0	0
chr2L	1011705	1011706	IA-2	0	0.1	0.05
chr2L	1011709	1011710	IA-2	0	0	0
chr2L	1011711	1011712	IA-2	0.1	0.1	0.1
chr2L	1011727	1011728	IA-2	0	0.05	0.02
chr2L	1011728	1011729	IA-2	0	0	0
chr2L	1011729	1011730	IA-2	0.1	0.02	0.06
chr2L	1011731	1011732	IA-2	0	0.1	0.05
chr2L	1011738	1011739	IA-2	0	0.08	0.04
chr2L	1011743	1011744	IA-2	0.08	0.08	0.08
chr2L	1011745	1011746	IA-2	0	0.02	0.01
chr2L	1011753	1011754	IA-2	0.08	0.1	0.09
chr2L	1011757	1011758	IA-2	0	0	0
chr2L	1011758	1011759	IA-2	0.1	0.1	0.1
chr2L	1011767	1011768	IA-2	0	0	0
chr2L	1011774	1011775	IA-2	0.1	0	0.05
chr2L	1011779	1011780	IA-2	0.2	0.2	0.2
chr2L	1011780	1011781	IA-2	0	0	0
chr2L	1011782	1011783	IA-2	0	0	0
chr2L	1011783	1011784	IA-2	0.1	0	0.05
chr2L	1011784	1011785	IA-2	0.02	0.02	0.02
chr2L	1011788	1011789	IA-2	0.08	0.1	0.09
chr2L	1011796	1011797	IA-2	0.1	0	0.05
chr2L	1011806	1011807	IA-2	0.02	0	0.01
chr2L	1011812	1011813	IA-2	0	0.05	0.02
chr2L	1011813	1011814	IA-2	0	0	0
chr2L	1011827	1011828	IA-2	0	0	0
chr2L	1011828	1011829	IA-2	0.1	0.1	0.1
chr2L	1011830	1011831	IA-2	0.1	0.1	0.1
chr2L	1011840	1011841	IA-2	0	0.08	0.04
chr2L	1011842	1011843	IA-2	0	0.1	0.05
chr2L	1011845	1011846	IA-2	0	0.02	0.01
chr2L	1011848	1011849	IA-2	0.1	0.1	0.1
chr2L	1011852	1011853	IA-2	0	0	0
chr2L	1011853	1011854	IA-2	0	0	0
chr2L	1011873	1011874	IA-2	0.08	0.02	0.05
chr2L	1011876	1011877	IA-2	0.1	0	0.05
chr2L	1011887	1011888	IA-2	0	0	0
chr2L	1011896	1011897	IA-2	0	0	0
chr2L	1011900	1011901	IA-2	0	0	0
chr2L	1011903	1011904	IA-2	0.1	0	0.05
chr2L	1011907	1011908	IA-2	0	0	0
chr2L	1011909	1011910	IA-2	0.1	0	0.05
chr2L	1011910	1011911	IA-2	0.1	0	0.05
chr2L	1011915	1011916	IA-2	0	0.1	0.05
chr2L	1011979	1011980	IA-2	0	0.1	0.05
chr2L	1011982	1011983	IA-2	0.05	0.1	0.08
chr2L	1011999	1012000	IA-2	0.1	0.1	0.1
chr2L	1012022	1012023	IA-2	0.08	0.15	0.12
chr2L	1012024	1012025	IA-2	0.02	0	0.01
chr2L	1012030	1012031	IA-2	0.25	0.22	0.24
chr2L	1012048	1012049	IA-2	0.2	0.2	0.2
chr2L	1012062	1012063	IA-2	0.1	0.1	0.1
chr2L	1012071	1012072	IA-2	0.05	0.05	0.05
chr2L	1012080	1012081	IA-2	0.1	0	0.05
chr2L	1012109	1012110	IA-2	0.1	0.1	0.1
chr2L	1012116	1012117	IA-2	0.02	0.08	0.05
chr2L	1012127	1012128	IA-2	0	0	0
chr2L	1012128	1012129	IA-2	0	0.1	0.05
chr2L	1012130	1012131	IA-2	0	0	0
chr2L	1012134	1012135	IA-2	0	0.1	0.05
chr2L	1012143	1012144	IA-2	0.1	0.1	0.1
chr2L	1012146	1012147	IA-2	0	0	0
chr2L	1012147	1012148	IA-2	0	0	0
chr2L	1012149	1012150	IA-2	0.1	0.1	0.1
chr2L	1012153	1012154	IA-2	0	0	0
chr2L	1012154	1012155	IA-2	0	0	0
chr2L	1012155	1012156	IA-2	0.1	0	0.05
chr2L	1012156	1012157	IA-2	0.15	0.08	0.12
chr2L	1012158	1012159	IA-2	0.2	0.25	0.22
chr2L	1012166	1012167	IA-2	0.1	0.1	0.1
chr2L	1012167	1012168	IA-2	0.1	0.1	0.1
chr2L	1012179	1012180	IA-2	0	0.02	0.01
chr2L	1012181	1012182	IA-2	0	0.1	0.05
chr2L	1012184	1012185	IA-2	0.1	0.1	0.1
chr2L	1012186	1012187	IA-2	0	0.1	0.05
chr2L	1012189	1012190	IA-2	0.1	0.1	0.1
chr2L	1012192	1012193	IA-2	0.4	0.2	0.3
chr2L	1012195	1012196	IA-2	0.82	0.68	0.75
chr2L	1012198	1012199	IA-2	0.02	0.08	0.05
chr2L	1012203	1012204	IA-2	0	0	0
chr2L	1012206	1012207	IA-2	0	0	0
chr2L	1012207	1012208	IA-2	0.1	0.1	0.1
chr2L	1012213	1012214	IA-2	0.4	0.5	0.45
chr2L	1012218	1012219	IA-2	0.2	0.1	0.15
chr2L	1012222	1012223	IA-2	0	0.1	0.05
chr2L	1012225	1012226	IA-2	0	0	0
chr2L	1012226	1012227	IA-2	0.08	0.08	0.08
chr2L	1012227	1012228	IA-2	0	0.1	0.05
chr2L	1012228	1012229	IA-2	0	0.1	0.05
chr2L	1012232	1012233	IA-2	0	0	0
chr2L	1012234	1012235	IA-2	0.1	0.2	0.15
chr2L	1012237	1012238	IA-2	0	0	0
chr2L	1012238	1012239	IA-2	0.08	0.1	0.09
chr2L	1012242	1012243	IA-2	0.08	0	0.04
chr2L	1012243	1012244	IA-2	0	0	0
chr2L	1012248	1012249	IA-2	0.4	0.3	0.35
chr2L	1012251	1012252	IA-2	0.05	0.05	0.05
chr2L	1012255	1012256	IA-2	0.3	0.4	0.35
chr2L	1012261	1012262	IA-2	0	0.1	0.05
chr2L	1012263	1012264	IA-2	0	0	0
chr2L	1012264	1012265	IA-2	0	0	0
chr2L	1012268	1012269	IA-2	0.1	0.1	0.1
chr2L	1012270	1012271	IA-2	0.2	0.2	0.2
chr2L	1012273	1012274	IA-2	0	0	0
chr2L	1012275	1012276	IA-2	0	0	0
chr2L	1012276	1012277	IA-2	0	0	0
chr2L	1012278	1012279	IA-2	0.02	0.1	0.06
chr2L	1012279	1012280	IA-2	0.1	0	0.05
chr2L	1012280	1012281	IA-2	0	0	0
chr2L	1012282	1012283	IA-2	0	0	0
chr2L	1012284	1012285	IA-2	0.1	0	0.05
chr2L	1012287	1012288	IA-2	0	0	0
chr2L	1012290	1012291	IA-2	0.1	0	0.05
chr2L	1012291	1012292	IA-2	0	0.1	0.05
chr2L	1012292	1012293	IA-2	0.08	0.08	0.08
chr2L	1012294	1012295	IA-2	0	0	0
chr2L	1012295	1012296	IA-2	0	0	0
chr2L	1012297	1012298	IA-2	0.15	0.15	0.15
chr2L	1012298	1012299	IA-2	0.1	0.1	0.1
chr2L	1012299	1012300	IA-2	0	0.1	0.05
chr2L	1012300	1012301	IA-2	0	0	0
chr2L	1012301	1012302	IA-2	0	0	0
chr2L	1012302	1012303	IA-2	0	0	0
chr2L	1012304	1012305	IA-2	0	0	0
chr2L	1012307	1012308	IA-2	0	0	0
chr2L	1012308	1012309	IA-2	0	0	0
chr2L	1012311	1012312	IA-2	0	0.1	0.05
chr2L	1012312	1012313	IA-2	0.1	0	0.05
chr2L	1012313	1012314	IA-2	0	0.1	0.05
chr2L	1012392	1012393	IA-2	0.9	0.9	0.9
chr2L	1012568	1012569	IA-2	0	0	0
chr2L	1012572	1012573	IA-2	0	0	0
chr2L	1012574	1012575	IA-2	0	0	0
chr2L	1012580	1012581	IA-2	0	0	0
chr2L	1012586	1012587	IA-2	0	0	0
chr2L	1012591	1012592	IA-2	0	0	0
chr2L	1012592	1012593	IA-2	0.02	0.08	0.05
chr2L	1012599	1012600	IA-2	0	0	0
chr2L	1012600	1012601	IA-2	0	0	0
chr2L	1012609	1012610	IA-2	0.1	0.1	0.1
chr2L	1012617	1012618	IA-2	0	0.1	0.05
chr2L	1012624	1012625	IA-2	0.15	0.1	0.12
chr2L	1012634	1012635	IA-2	0.2	0.28	0.24
chr2L	1012641	1012642	IA-2	0	0.1	0.05
chr2L	1012649	1012650	IA-2	0	0	0
chr2L	1012650	1012651	IA-2	0	0	0
chr2L	1012651	1012652	IA-2	0.1	0	0.05
chr2L	1012652	1012653	IA-2	0	0.1	0.05
chr2L	1012654	1012655	IA-2	6.4	2.43	4.42
chr2L	1012659	1012660	IA-2	0	0	0
chr2L	1012664	1012665	IA-2	0	0.3	0.15
chr2L	1012668	1012669	IA-2	0.1	0	0.05
chr2L	1012669	1012670	IA-2	0	0.1	0.05
chr2L	1012670	1012671	IA-2	0	0	0
chr2L	1012671	1012672	IA-2	0	0	0
chr2L	1012673	1012674	IA-2	0.5	0.1	0.3
chr2L	1012681	1012682	IA-2	0.2	0.2	0.2
chr2L	1012689	1012690	IA-2	0.1	0.1	0.1
chr2L	1012695	1012696	IA-2	0.1	0	0.05
chr2L	1012698	1012699	IA-2	0.1	0.1	0.1
chr2L	1012709	1012710	IA-2	0	0	0
chr2L	1012715	1012716	IA-2	0	0.02	0.01
chr2L	1012849	1012850	IA-2	0	0	0
chr2L	1012854	1012855	IA-2	0	0	0
chr2L	1012858	1012859	IA-2	0	0.1	0.05
chr2L	1012871	1012872	IA-2	0	0	0
chr2L	1012877	1012878	IA-2	0	0	0
chr2L	1012886	1012887	IA-2	0.1	0.1	0.1
chr2L	1012895	1012896	IA-2	0	0.1	0.05
chr2L	1012927	1012928	IA-2	0	0.1	0.05
chr2L	1013013	1013014	IA-2	0.1	0	0.05
chr2L	1013063	1013064	IA-2	0	0.1	0.05
chr2L	1013070	1013071	IA-2	0.1	0	0.05
chr2L	1013072	1013073	IA-2	0.02	0.08	0.05
chr2L	1013094	1013095	IA-2	0.05	0.1	0.08
chr2L	1013108	1013109	IA-2	0.02	0	0.01
chr2L	1013118	1013119	IA-2	0	0	0
chr2L	1013124	1013125	IA-2	0.12	0.1	0.11
chr2L	1013469	1013470	IA-2	0.02	0.02	0.02
chr2L	1013503	1013504	IA-2	0.1	0.08	0.09
chr2L	1013513	1013514	IA-2	0.3	0.6	0.45
chr2L	1013552	1013553	IA-2	0.1	0	0.05
chr2L	1013575	1013576	IA-2	0.1	0.1	0.1
chr2L	1013605	1013606	IA-2	0.1	0	0.05
chr2L	1014711	1014712	IA-2	0.55	0.35	0.45
chr2L	101486	101487	Zir	0.8	0.6	0.7
chr2L	1015251	1015252	IA-2	0.5	0.2	0.35
chr2L	1015430	1015431	IA-2	0.85	0.65	0.75
chr2L	101595	101596	Zir	0.8	0.6	0.7
chr2L	101895	101896	Zir	0.7	0.7	0.7
chr2L	10200056	10200057	Ripalpha	2.4	1.4	1.9
chr2L	10201434	10201435	RpL7	0.2	0.32	0.26
chr2L	10202124	10202125	RpL7	0.1	0.1	0.1
chr2L	10202125	10202126	RpL7	0.1	0.5	0.3
chr2L	10202126	10202127	RpL7	0.1	0.1	0.1
chr2L	10202788	10202789	CG34159	4	1.1	2.55
chr2L	10203458	10203459	CG34159	0.9	0.7	0.8
chr2L	10203591	10203592	CG34159	3.6	1.3	2.45
chr2L	10210113	10210114	CG5727	2.1	2.8	2.45
chr2L	10210140	10210141	CG5727	2.2	2.3	2.25
chr2L	10210602	10210603	CG5727	2	1.5	1.75
chr2L	10213939	10213940	Npc1a	1.4	0.8	1.1
chr2L	10217669	10217670	Npc1a	6.7	5.9	6.3
chr2L	10217729	10217730	Npc1a	13.3	5.3	9.3
chr2L	10221937	10221938	Prosalpha6	1.4	0.8	1.1
chr2L	10222376	10222377	Prosalpha6	1.5	0.6	1.05
chr2L	10222482	10222483	Prosalpha6	2.4	2	2.2
chr2L	10223478	10223479	CG4908	2.9	3.7	3.3
chr2L	10223479	10223480	CG4908	3	1.9	2.45
chr2L	10223816	10223817	CG4908	2.6	2.3	2.45
chr2L	10225337	10225338	CG5708	0.8	0.6	0.7
chr2L	10225338	10225339	CG5708	0.8	0.6	0.7
chr2L	10225580	10225581	CG5708	1.1	0.6	0.85
chr2L	10227886	10227887	CG5694	2.1	1.5	1.8
chr2L	10232618	10232619	eEF1delta	0.6	0.7	0.65
chr2L	10232632	10232633	eEF1delta	0.3	0.4	0.35
chr2L	10233927	10233928	eEF1delta	0.4	0.2	0.3
chr2L	10234043	10234044	eEF1delta	0.28	0.4	0.34
chr2L	10234089	10234090	eEF1delta	0.28	0.18	0.23
chr2L	10242084	10242085	me31B	0.5	0.4	0.45
chr2L	10242091	10242092	me31B	0.6	0.4	0.5
chr2L	10242921	10242922	CR44995	1.5	1.1	1.3
chr2L	10243566	10243567	chico	8.7	3.6	6.15
chr2L	10247667	10247668	bsk	0.3	0.5	0.4
chr2L	10247937	10247938	bsk	0.5	0.3	0.4
chr2L	10248297	10248298	bsk	0.4	0.6	0.5
chr2L	10248526	10248527	bsk	0.4	0.3	0.35
chr2L	10250352	10250353	bsk	12.5	7.1	9.8
chr2L	10253475	10253476	Ror	6.3	4.2	5.25
chr2L	10254818	10254819	CG5676	0.1	0.2	0.15
chr2L	10254829	10254830	CG5676	0.3	0.5	0.4
chr2L	10255147	10255148	CG5676	0.2	0.2	0.2
chr2L	10255168	10255169	CG5676	0.2	0.2	0.2
chr2L	10255755	10255756	CG5676	0.2	0.3	0.25
chr2L	10255785	10255786	CG5676	0.1	0.1	0.1
chr2L	10255804	10255805	CG5676	0.3	0.1	0.2
chr2L	10257793	10257794	Pten	1.9	1.2	1.55
chr2L	10257900	10257901	Pten	1.9	1.2	1.55
chr2L	10258149	10258150	Pten	2.6	1.9	2.25
chr2L	10258802	10258803	Pten	2.7	2	2.35
chr2L	10261904	10261905	Rsf1	0.7	1.2	0.95
chr2L	10261941	10261942	Rsf1	0.7	0.6	0.65
chr2L	10262054	10262055	Rsf1	0.6	1	0.8
chr2L	10262171	10262172	Rsf1	0.8	0.6	0.7
chr2L	10262430	10262431	Rsf1	0.5	0.4	0.45
chr2L	10262442	10262443	Rsf1	0.8	1.4	1.1
chr2L	10262464	10262465	Rsf1	0.9	0.6	0.75
chr2L	10262472	10262473	Rsf1	0.3	0.7	0.5
chr2L	10262482	10262483	Rsf1	0.8	0.3	0.55
chr2L	10262501	10262502	Rsf1	0.2	0.2	0.2
chr2L	10262504	10262505	Rsf1	0.5	0.4	0.45
chr2L	10262628	10262629	Rsf1	0.5	0.4	0.45
chr2L	10262800	10262801	Rsf1	0.8	0.4	0.6
chr2L	10264232	10264233	CG18619	1.4	0.2	0.8
chr2L	10264551	10264552	CG18619	0.4	0.4	0.4
chr2L	10264583	10264584	CG18619	0.42	0.2	0.31
chr2L	10264801	10264802	CG18619	0.2	0.2	0.2
chr2L	10264948	10264949	CG18619	0.2	0.2	0.2
chr2L	10264965	10264966	CG18619	0.2	0.2	0.2
chr2L	10265028	10265029	CG18619	0.3	0.4	0.35
chr2L	10265840	10265841	Mob3	1.2	0.8	1
chr2L	10265846	10265847	Mob3	1.3	0.9	1.1
chr2L	10265940	10265941	Mob3	1.8	0.6	1.2
chr2L	10266059	10266060	Mob3	1.1	0.8	0.95
chr2L	10266086	10266087	Mob3	1.2	0.8	1
chr2L	10266405	10266406	Mob3	1.9	0.6	1.25
chr2L	10267548	10267549	CG4953	13.3	5	9.15
chr2L	10268030	10268031	CG4953	3	1.9	2.45
chr2L	10269162	10269163	CG4957	2.9	1.8	2.35
chr2L	10269188	10269189	CG4957	2.3	6.8	4.55
chr2L	10272535	10272536	Utx	3	2.2	2.6
chr2L	10273583	10273584	Utx	1.6	4.2	2.9
chr2L	10274944	10274945	Utx	7.1	7.1	7.1
chr2L	10282255	10282256	CG5604	0.4	0.5	0.45
chr2L	10283173	10283174	CG5604	0.7	0.5	0.6
chr2L	10283457	10283458	CG5604	1.1	0.7	0.9
chr2L	10296350	10296351	CYLD	1.4	0.8	1.1
chr2L	10297284	10297285	CYLD	3.3	1.2	2.25
chr2L	10302848	10302849	nmd	1.5	0.9	1.2
chr2L	10304114	10304115	CG5390	0.6	0.3	0.45
chr2L	10304127	10304128	CG5390	3.6	0.3	1.95
chr2L	10304141	10304142	CG5390	0.4	1.5	0.95
chr2L	10304228	10304229	CG5390	0.4	0.4	0.4
chr2L	10304229	10304230	CG5390	0.4	0.4	0.4
chr2L	10304243	10304244	CG5390	0.4	0.4	0.4
chr2L	10304259	10304260	CG5390	0.3	0.2	0.25
chr2L	10304341	10304342	CG5390	0.7	0.4	0.55
chr2L	10304717	10304718	CG5390	0.7	0.3	0.5
chr2L	10305182	10305183	CG5390	0.8	0.4	0.6
chr2L	10305356	10305357	CG5390	1.3	0.6	0.95
chr2L	10308198	10308199	Cdk5alpha	0.5	0.4	0.45
chr2L	10309721	10309722	Cdk5alpha	0.6	0.7	0.65
chr2L	10310693	10310694	Cdk5alpha	0.6	0.7	0.65
chr2L	10311285	10311286	l(2)SH0834	2	2.1	2.05
chr2L	10311600	10311601	l(2)SH0834	1	0.82	0.91
chr2L	10311931	10311932	l(2)SH0834	1.4	0.6	1
chr2L	10312848	10312849	CG5384	1	0.9	0.95
chr2L	10313654	10313655	CG5384	6.3	2.1	4.2
chr2L	10316675	10316676	CG4972	1.32	0.8	1.06
chr2L	10317118	10317119	CG4972	1.5	0.8	1.15
chr2L	10317295	10317296	CG4972	0.8	7.1	3.95
chr2L	10317739	10317740	CG5381	2.6	2	2.3
chr2L	10318286	10318287	CG5381	10.5	4.3	7.4
chr2L	10319509	10319510	CG5381	20	25	22.5
chr2L	10328488	10328489	CG5375	0.6	1.1	0.85
chr2L	10328613	10328614	CG5375	0.5	0.4	0.45
chr2L	10328960	10328961	CG5375	0.7	0.7	0.7
chr2L	10329352	10329353	CG5375	2.2	1	1.6
chr2L	10329475	10329476	CG5375	6.7	1.4	4.05
chr2L	10329549	10329550	CG5375	2.4	0.6	1.5
chr2L	10331561	10331562	CG5037	0.9	0.7	0.8
chr2L	10331805	10331806	CG5037	2.2	0.8	1.5
chr2L	10331863	10331864	CG5037	1.2	0.9	1.05
chr2L	10332199	10332200	CG5037	1.4	0.8	1.1
chr2L	10332881	10332882	CG5037	0.6	0.4	0.5
chr2L	10339608	10339609	SamDC	0.9	0.7	0.8
chr2L	10340747	10340748	SamDC	2.7	1	1.85
chr2L	10340756	10340757	SamDC	1.8	1.4	1.6
chr2L	10341352	10341353	SamDC	0.8	0.6	0.7
chr2L	10343058	10343059	Sps2	1.4	1.4	1.4
chr2L	10343508	10343509	Sps2	1.2	2.6	1.9
chr2L	10343566	10343567	Sps2	2.1	1.1	1.6
chr2L	10343740	10343741	Sps2	0.8	0.9	0.85
chr2L	10343944	10343945	Sps2	0.7	1	0.85
chr2L	10344018	10344019	Sps2	1.9	1	1.45
chr2L	10351946	10351947	CG34367	2.6	1.8	2.2
chr2L	10356923	10356924	CG5045	0.9	5.3	3.1
chr2L	10357640	10357641	CG5045	1	0.9	0.95
chr2L	10357807	10357808	CG5045	2.4	0.8	1.6
chr2L	10357979	10357980	CG5045	1.1	3.2	2.15
chr2L	10359062	10359063	Cand1	2.9	2.9	2.9
chr2L	10367538	10367539	CG5056	3.1	1.2	2.15
chr2L	10368109	10368110	rho-5	1	0.7	0.85
chr2L	10368616	10368617	rho-5	1.1	1.7	1.4
chr2L	10368667	10368668	rho-5	1.5	2.2	1.85
chr2L	10368673	10368674	rho-5	1.4	1.1	1.25
chr2L	10370070	10370071	rho-5	2.77	1.4	2.08
chr2L	10370092	10370093	rho-5	3.1	2	2.55
chr2L	10374470	10374471	CG33303	1	0.7	0.85
chr2L	10374569	10374570	CG33303	3.1	4.2	3.65
chr2L	10375612	10375613	CG33303	1.2	1.6	1.4
chr2L	10378951	10378952	dpr19	1.2	1.1	1.15
chr2L	10378969	10378970	dpr19	1.4	0.9	1.15
chr2L	10379455	10379456	dpr19	0.8	0.6	0.7
chr2L	10379583	10379584	dpr19	0.9	0.7	0.8
chr2L	10379636	10379637	dpr19	1.5	0.5	1
chr2L	10379845	10379846	dpr19	3.2	1.1	2.15
chr2L	10386889	10386890	mRpS7	0.6	0.4	0.5
chr2L	10386926	10386927	mRpS7	1	0.7	0.85
chr2L	10387352	10387353	mRpS7	0.6	0.5	0.55
chr2L	10390434	10390435	da	5.6	3.7	4.65
chr2L	10391004	10391005	da	4.3	3	3.65
chr2L	10392349	10392350	da	0.9	0.8	0.85
chr2L	10392480	10392481	da	0.8	0.6	0.7
chr2L	10392774	10392775	da	1.5	1.8	1.65
chr2L	10392908	10392909	da	1.8	1.6	1.7
chr2L	10393078	10393079	da	1.4	1.3	1.35
chr2L	10393881	10393882	Mdh1	0.55	0.7	0.62
chr2L	10393914	10393915	Mdh1	0.3	0.2	0.25
chr2L	10394022	10394023	Mdh1	0.3	0.1	0.2
chr2L	10394573	10394574	Mdh1	0.3	0.12	0.21
chr2L	10400445	10400446	Cnot4	0.9	0.6	0.75
chr2L	10401373	10401374	Cnot4	1.4	1.3	1.35
chr2L	10401850	10401851	Cnot4	0.9	0.8	0.85
chr2L	10402100	10402101	Cnot4	0.68	1.75	1.22
chr2L	10402182	10402183	Cnot4	0.6	0.8	0.7
chr2L	10402206	10402207	Cnot4	0.6	0.5	0.55
chr2L	10402777	10402778	Cnot4	0.6	0.9	0.75
chr2L	10402901	10402902	Cnot4	2.6	1.1	1.85
chr2L	10403425	10403426	CG17768	0.8	0.6	0.7
chr2L	10403425	10403426	LSm-4	0.8	0.6	0.7
chr2L	10404514	10404515	CG17768	4.3	2.1	3.2
chr2L	10404514	10404515	LSm-4	4.3	2.1	3.2
chr2L	10404879	10404880	CG17768	2.9	5	3.95
chr2L	10404879	10404880	LSm-4	2.9	5	3.95
chr2L	10408367	10408368	Ip259	29.4	6.7	18.05
chr2L	10408367	10408368	RpS27A	29.4	6.7	18.05
chr2L	10408383	10408384	Ip259	0.1	0.1	0.1
chr2L	10408383	10408384	RpS27A	0.1	0.1	0.1
chr2L	10408752	10408753	Ip259	0.7	0.3	0.5
chr2L	10408752	10408753	RpS27A	0.7	0.3	0.5
chr2L	10408776	10408777	Ip259	0.1	0.1	0.1
chr2L	10408776	10408777	RpS27A	0.1	0.1	0.1
chr2L	10408779	10408780	Ip259	0.1	0.1	0.1
chr2L	10408779	10408780	RpS27A	0.1	0.1	0.1
chr2L	10408800	10408801	Ip259	0.2	0.2	0.2
chr2L	10408800	10408801	RpS27A	0.2	0.2	0.2
chr2L	10408877	10408878	Ip259	0.28	0.1	0.19
chr2L	10408877	10408878	RpS27A	0.28	0.1	0.19
chr2L	10408887	10408888	Ip259	0.1	0.1	0.1
chr2L	10408887	10408888	RpS27A	0.1	0.1	0.1
chr2L	10408916	10408917	Ip259	0.4	0.8	0.6
chr2L	10408916	10408917	RpS27A	0.4	0.8	0.6
chr2L	10408919	10408920	Ip259	1.9	1.7	1.8
chr2L	10408919	10408920	RpS27A	1.9	1.7	1.8
chr2L	10408920	10408921	Ip259	4.92	5.28	5.1
chr2L	10408920	10408921	RpS27A	4.92	5.28	5.1
chr2L	10408944	10408945	Ip259	0.1	0.1	0.1
chr2L	10408944	10408945	RpS27A	0.1	0.1	0.1
chr2L	10408949	10408950	Ip259	0.1	0.2	0.15
chr2L	10408949	10408950	RpS27A	0.1	0.2	0.15
chr2L	10408977	10408978	Ip259	0.1	0.4	0.25
chr2L	10408977	10408978	RpS27A	0.1	0.4	0.25
chr2L	10409073	10409074	Ip259	0	0.1	0.05
chr2L	10409073	10409074	RpS27A	0	0.1	0.05
chr2L	10409170	10409171	Ip259	0.02	0.1	0.06
chr2L	10409170	10409171	RpS27A	0.02	0.1	0.06
chr2L	10409430	10409431	Ip259	0.22	0.65	0.44
chr2L	10409430	10409431	RpS27A	0.22	0.65	0.44
chr2L	10409502	10409503	Ip259	0.1	0	0.05
chr2L	10409502	10409503	RpS27A	0.1	0	0.05
chr2L	10409553	10409554	Ip259	0.4	0.1	0.25
chr2L	10409553	10409554	RpS27A	0.4	0.1	0.25
chr2L	10409571	10409572	Ip259	0.6	0.7	0.65
chr2L	10409571	10409572	RpS27A	0.6	0.7	0.65
chr2L	10410444	10410445	RpS27A	0.1	0.1	0.1
chr2L	10410891	10410892	CG5355	1	0.8	0.9
chr2L	104147	104148	Nhe1	2.9	2.3	2.6
chr2L	10423639	10423640	CG5168	1.3	0.9	1.1
chr2L	10424548	10424549	CG5168	0.9	0.7	0.8
chr2L	10424995	10424996	CG5168	0.7	0.7	0.7
chr2L	10425305	10425306	CG5168	0.5	0.9	0.7
chr2L	10425355	10425356	CG5168	1.1	0.5	0.8
chr2L	10425373	10425374	CG5168	0.6	1	0.8
chr2L	10426104	10426105	SmB	0.5	0.4	0.45
chr2L	10426980	10426981	KdelR	2.8	0.6	1.7
chr2L	10427452	10427453	KdelR	0.8	0.6	0.7
chr2L	10427771	10427772	KdelR	0.9	0.6	0.75
chr2L	10427884	10427885	KdelR	0.8	0.6	0.7
chr2L	10428411	10428412	KdelR	1.23	2.1	1.66
chr2L	10428417	10428418	KdelR	3.8	2.8	3.3
chr2L	10432512	10432513	TfIIB	1.3	1	1.15
chr2L	10432652	10432653	TfIIB	0.7	0.6	0.65
chr2L	10432733	10432734	CG5337	1	0.5	0.75
chr2L	10432739	10432740	TfIIB	1	0.5	0.75
chr2L	10432749	10432750	CG5337	0.5	0.5	0.5
chr2L	10432752	10432753	CG5337	0.5	0.5	0.5
chr2L	10432773	10432774	CG5337	0.5	0.5	0.5
chr2L	10432873	10432874	TfIIB	0.9	0.5	0.7
chr2L	10432916	10432917	TfIIB	0.6	1.1	0.85
chr2L	10432940	10432941	TfIIB	2.2	0.6	1.4
chr2L	10433029	10433030	TfIIB	0.6	0.9	0.75
chr2L	10433032	10433033	TfIIB	1.2	0.5	0.85
chr2L	10434615	10434616	CG5337	1.5	1.4	1.45
chr2L	10436	10437	l(2)gl	5.3	5.6	5.45
chr2L	10438061	10438062	CHIP	1.1	1.5	1.3
chr2L	10438952	10438953	CHIP	0.7	1.8	1.25
chr2L	10452801	10452802	CG5322	2	1.6	1.8
chr2L	10453745	10453746	CG5322	5.6	5.3	5.45
chr2L	10458796	10458797	LM408	2.3	1.3	1.8
chr2L	10459944	10459945	LM408	2.5	2	2.25
chr2L	10460785	10460786	LM408	0.5	0.3	0.4
chr2L	10460908	10460909	LM408	0.4	0.5	0.45
chr2L	10460909	10460910	LM408	0.7	1.5	1.1
chr2L	10461510	10461511	LM408	0.3	0.2	0.25
chr2L	10461611	10461612	LM408	0.4	0.3	0.35
chr2L	10461674	10461675	LM408	0.2	0.2	0.2
chr2L	10461744	10461745	LM408	0.5	0.2	0.35
chr2L	10462199	10462200	LM408	0.2	0.3	0.25
chr2L	10462276	10462277	LM408	0.2	0.2	0.2
chr2L	10462350	10462351	LM408	0.2	0.1	0.15
chr2L	10462362	10462363	LM408	0.2	0.1	0.15
chr2L	104660	104661	Nhe1	1.8	1.2	1.5
chr2L	10476	10477	l(2)gl	6.3	2.9	4.6
chr2L	10489372	10489373	CG6144	2.2	1.9	2.05
chr2L	10490319	10490320	CG13144	2	2.1	2.05
chr2L	10507753	10507754	CG6094	1.7	1.2	1.45
chr2L	10507794	10507795	CG6094	2.4	3	2.7
chr2L	1050995	1050996	S	5.9	2.3	4.1
chr2L	10511424	10511425	CG45083	1.2	0.9	1.05
chr2L	10511424	10511425	Fatp	1.2	0.9	1.05
chr2L	10511485	10511486	CG45083	0.5	0.8	0.65
chr2L	10511485	10511486	Fatp	0.5	0.8	0.65
chr2L	10511706	10511707	CG45083	0.6	0.5	0.55
chr2L	10511706	10511707	Fatp	0.6	0.5	0.55
chr2L	10511856	10511857	CG45083	1.3	1.5	1.4
chr2L	10511856	10511857	Fatp	1.3	1.5	1.4
chr2L	10512514	10512515	CG45083	1.1	1.1	1.1
chr2L	10512514	10512515	Fatp	1.1	1.1	1.1
chr2L	10531216	10531217	Lip4	3.2	1.2	2.2
chr2L	10531240	10531241	Lip4	1.7	1.3	1.5
chr2L	10531249	10531250	Lip4	1.9	1.3	1.6
chr2L	10531272	10531273	Lip4	4.5	1.4	2.95
chr2L	10625253	10625254	Trim9	4.8	3.6	4.2
chr2L	10627490	10627491	Trim9	1.4	1.5	1.45
chr2L	10627508	10627509	Trim9	1.4	1.9	1.65
chr2L	10627766	10627767	Trim9	1.9	2.7	2.3
chr2L	106433	106434	Nhe1	7.1	3.4	5.25
chr2L	10693017	10693018	CG17108	0.3	0.15	0.22
chr2L	10693022	10693023	CG17108	0.1	0	0.05
chr2L	10693103	10693104	CG17108	0.1	0.05	0.08
chr2L	10693107	10693108	CG17108	0.1	0.1	0.1
chr2L	10693157	10693158	CG17108	0.3	0.1	0.2
chr2L	10693168	10693169	CG17108	0.65	0.22	0.44
chr2L	10693173	10693174	CG17108	0.4	0.2	0.3
chr2L	10693190	10693191	CG17108	0.8	0.5	0.65
chr2L	10693196	10693197	CG17108	0.4	0.5	0.45
chr2L	10693223	10693224	CG17108	0.2	0.1	0.15
chr2L	10693225	10693226	CG17108	0	0.1	0.05
chr2L	10693254	10693255	CG17108	0.25	0.25	0.25
chr2L	10693257	10693258	CG17108	0	0	0
chr2L	10693264	10693265	CG17108	0.2	0	0.1
chr2L	10693283	10693284	CG17108	0.1	0.15	0.12
chr2L	10693555	10693556	CG17108	0.3	0.4	0.35
chr2L	10730249	10730250	CG6443	2.8	2	2.4
chr2L	10731580	10731581	CG6750	1.3	1.3	1.3
chr2L	10732917	10732918	Dpy-30L1	1.7	0.9	1.3
chr2L	10733069	10733070	Dpy-30L1	1.1	1.1	1.1
chr2L	10741227	10741228	CG6729	5	4	4.5
chr2L	10744133	10744134	CG17124	3.4	2.1	2.75
chr2L	10744155	10744156	CG17124	0.8	0.6	0.7
chr2L	10744186	10744187	CG17124	1.3	0.5	0.9
chr2L	10744233	10744234	CG17124	0.6	0.4	0.5
chr2L	10744453	10744454	CG17124	0.8	0.5	0.65
chr2L	10744698	10744699	CG17124	1.1	0.7	0.9
chr2L	10744848	10744849	CG17124	3.3	1.4	2.35
chr2L	10744928	10744929	CG17124	1.7	1	1.35
chr2L	10745113	10745114	CG17124	3.4	1.4	2.4
chr2L	10745244	10745245	CG17124	0.6	0.9	0.75
chr2L	10745268	10745269	CG17124	0.4	0.2	0.3
chr2L	10745297	10745298	CG17124	0.5	0.2	0.35
chr2L	10745433	10745434	CG17124	0.5	0.3	0.4
chr2L	10745472	10745473	CG17124	0.5	0.9	0.7
chr2L	10745663	10745664	CG17124	0.62	0.98	0.8
chr2L	10745930	10745931	CG17124	0.9	0.3	0.6
chr2L	10746046	10746047	CG17124	0.6	0.3	0.45
chr2L	10755934	10755935	CG17124	0.6	1	0.8
chr2L	10762247	10762248	CG6495	5.6	1.9	3.75
chr2L	10762742	10762743	CG6495	2	1.9	1.95
chr2L	10762854	10762855	CG6495	2	1.2	1.6
chr2L	10764452	10764453	CG6495	0.5	0.5	0.5
chr2L	10764682	10764683	CG6495	1.2	0.5	0.85
chr2L	10764712	10764713	CG6495	0.6	0.5	0.55
chr2L	10764862	10764863	CG6495	0.7	1.5	1.1
chr2L	10765431	10765432	UbcD2	0.6	1.2	0.9
chr2L	10765810	10765811	UbcD2	0.9	0.8	0.85
chr2L	10768372	10768373	CG6724	2.2	1.5	1.85
chr2L	10768866	10768867	CG6724	9.5	2.8	6.15
chr2L	10772753	10772754	CG31869	5.9	3.8	4.85
chr2L	10773149	10773150	CG31869	7.1	2.8	4.95
chr2L	10773449	10773450	CG31869	5.6	4.3	4.95
chr2L	10775375	10775376	CG31869	14.3	6.7	10.5
chr2L	10800681	10800682	CG31869	1.8	2.7	2.25
chr2L	10806179	10806180	Nos	4	3.3	3.65
chr2L	1082803	1082804	Atg4a	2.8	2.6	2.7
chr2L	1083120	1083121	Atg4a	1.9	0.7	1.3
chr2L	1083464	1083465	Atg4a	0.9	0.8	0.85
chr2L	1083502	1083503	Atg4a	1.3	0.5	0.9
chr2L	1083511	1083512	Atg4a	0.6	0.5	0.55
chr2L	1083666	1083667	CG4629	0.7	0.5	0.6
chr2L	10837770	10837771	CG6700	0.7	0.7	0.7
chr2L	10837780	10837781	CG6700	0.6	1.2	0.9
chr2L	10838199	10838200	CG6700	0.4	0.3	0.35
chr2L	10838402	10838403	CG6700	1.1	1	1.05
chr2L	1084197	1084198	Atg4a	1.2	0.9	1.05
chr2L	1084208	1084209	Atg4a	1.1	0.8	0.95
chr2L	10847317	10847318	porin	0.2	0.1	0.15
chr2L	10847319	10847320	porin	0.5	0.1	0.3
chr2L	10847332	10847333	porin	0.1	0.3	0.2
chr2L	10847333	10847334	porin	0.1	0.3	0.2
chr2L	10847389	10847390	porin	0.1	0.1	0.1
chr2L	10847401	10847402	porin	0.1	0.1	0.1
chr2L	10847421	10847422	porin	0.2	0.3	0.25
chr2L	10848846	10848847	porin	0.1	0	0.05
chr2L	10850801	10850802	CG43129	0.1	0.2	0.15
chr2L	1085265	1085266	Atg4a	2.9	2.2	2.55
chr2L	10854533	10854534	Dnz1	1	1.1	1.05
chr2L	10854659	10854660	Dnz1	2	2.7	2.35
chr2L	10854837	10854838	Dnz1	2.8	2.2	2.5
chr2L	1087698	1087699	CG4629	10	4.2	7.1
chr2L	10964944	10964945	CG33129	0.8	0.8	0.8
chr2L	10965093	10965094	CG33129	0.4	0.4	0.4
chr2L	10965105	10965106	CG33129	0.4	0.6	0.5
chr2L	10965175	10965176	CG33129	1	0.3	0.65
chr2L	10965179	10965180	CG33129	0.3	0.4	0.35
chr2L	10965208	10965209	CG33129	0.4	0.3	0.35
chr2L	10965241	10965242	CG33129	0.6	0.3	0.45
chr2L	10965324	10965325	CG33129	0.5	0.3	0.4
chr2L	10965384	10965385	CG33129	0.3	0.3	0.3
chr2L	10966202	10966203	CG33129	0.7	0.6	0.65
chr2L	10971709	10971710	YL-1	1.9	2.1	2
chr2L	10973084	10973085	CG16743	0.4	0.7	0.55
chr2L	10973189	10973190	CG16743	0.3	0.5	0.4
chr2L	10975709	10975710	l(2)06225	1.2	3.6	2.4
chr2L	10975844	10975845	l(2)06225	0.3	0.5	0.4
chr2L	10976077	10976078	l(2)06225	0.32	0.5	0.41
chr2L	10976292	10976293	l(2)06225	0	0	0
chr2L	10976365	10976366	l(2)06225	0.2	0.1	0.15
chr2L	10981400	10981401	SCAR	1.08	0.8	0.94
chr2L	10981753	10981754	SCAR	0.8	0.7	0.75
chr2L	10981981	10981982	SCAR	2.5	2	2.25
chr2L	10982103	10982104	SCAR	0.8	0.7	0.75
chr2L	10982293	10982294	SCAR	0.8	0.7	0.75
chr2L	10989118	10989119	CG12253	1.8	2.8	2.3
chr2L	10992213	10992214	CG16833	5.6	3.7	4.65
chr2L	10997370	10997371	CG16833	1.4	2.1	1.75
chr2L	11002868	11002869	RpL9	0.1	0.1	0.1
chr2L	11002870	11002871	RpL9	0.1	0.1	0.1
chr2L	11003752	11003753	RpL9	0.35	0.3	0.32
chr2L	11004037	11004038	RpL9	0	0.1	0.05
chr2L	11004049	11004050	RpL9	0	0	0
chr2L	11011944	11011945	dUTPase	3.2	2	2.6
chr2L	1103556	1103557	mtRNApol	3.8	3.2	3.5
chr2L	1104963	1104964	mtRNApol	8.3	6.3	7.3
chr2L	11076279	11076280	AstC	0.7	0.2	0.45
chr2L	11076292	11076293	AstC	0.2	0.2	0.2
chr2L	11076296	11076297	AstC	1.1	0.8	0.95
chr2L	11076328	11076329	AstC	0.2	0.2	0.2
chr2L	11076370	11076371	AstC	0.6	0.3	0.45
chr2L	11076381	11076382	AstC	0.7	0.7	0.7
chr2L	11076382	11076383	AstC	1.3	0.8	1.05
chr2L	11076492	11076493	AstC	1	0.7	0.85
chr2L	11076497	11076498	AstC	1	0.9	0.95
chr2L	11076650	11076651	AstC	0.3	0.3	0.3
chr2L	11076989	11076990	AstC	0.3	0.5	0.4
chr2L	11081303	11081304	AstC	0.2	0.4	0.3
chr2L	11090758	11090759	CG16854	2.9	2.5	2.7
chr2L	11095517	11095518	Ge-1	1.8	1.3	1.55
chr2L	11101288	11101289	Reps	1.8	1.3	1.55
chr2L	11102127	11102128	Reps	4.2	11.1	7.65
chr2L	11110229	11110230	l(2)gd1	2.8	1.8	2.3
chr2L	11111351	11111352	CG6201	3.7	3.6	3.65
chr2L	11123101	11123102	Csl4	5.4	3.8	4.6
chr2L	11123115	11123116	Csl4	2.2	1.9	2.05
chr2L	11123164	11123165	Csl4	3.4	3.4	3.4
chr2L	11134639	11134640	CG4751	5.6	6.7	6.15
chr2L	11135379	11135380	CG4751	5	3.6	4.3
chr2L	11135443	11135444	CG4751	3.7	3.1	3.4
chr2L	11135705	11135706	CG4751	5.4	2.4	3.9
chr2L	1114750	1114751	Pino	1.2	0.4	0.8
chr2L	1114792	1114793	Pino	0.3	0.5	0.4
chr2L	1114838	1114839	Pino	0.3	0.2	0.25
chr2L	1114951	1114952	Pino	0.3	0.2	0.25
chr2L	1115128	1115129	Pino	0.6	0.7	0.65
chr2L	1115160	1115161	Pino	0.4	0.2	0.3
chr2L	11151699	11151700	CG6287	0.18	0.18	0.18
chr2L	11151725	11151726	CG6287	0.1	0.3	0.2
chr2L	11152144	11152145	CG6287	0.2	0.2	0.2
chr2L	11152242	11152243	CG6287	1.4	0.6	1
chr2L	11152252	11152253	CG6287	0.8	0.2	0.5
chr2L	11152257	11152258	CG6287	0.2	0.2	0.2
chr2L	11152260	11152261	CG6287	0.2	0.2	0.2
chr2L	11152421	11152422	CG6287	0.2	0.2	0.2
chr2L	1115289	1115290	Pino	0.6	0.6	0.6
chr2L	11153434	11153435	CG6287	0.2	0.2	0.2
chr2L	1115431	1115432	Pino	0.7	0.4	0.55
chr2L	11155084	11155085	CG6287	0.2	0.2	0.2
chr2L	11155100	11155101	CG6287	0.3	0.2	0.25
chr2L	11155125	11155126	CG6287	0.5	0.2	0.35
chr2L	11155619	11155620	CG6287	0.2	0.1	0.15
chr2L	11156367	11156368	Ca-beta	0.9	1.2	1.05
chr2L	11156398	11156399	Ca-beta	0.6	0.8	0.7
chr2L	11156442	11156443	Ca-beta	1.4	0.9	1.15
chr2L	11156532	11156533	Ca-beta	0.5	0.4	0.45
chr2L	11156554	11156555	Ca-beta	0.9	2.1	1.5
chr2L	11156594	11156595	Ca-beta	0.6	0.5	0.55
chr2L	11157000	11157001	Ca-beta	1.1	2.2	1.65
chr2L	11157056	11157057	Ca-beta	1	1.2	1.1
chr2L	11165351	11165352	Ca-beta	16.7	6.3	11.5
chr2L	1118675	1118676	Pino	1.7	0.9	1.3
chr2L	11211841	11211842	ab	0.7	1.2	0.95
chr2L	11211923	11211924	ab	3.6	1.2	2.4
chr2L	11211924	11211925	ab	1.8	0.7	1.25
chr2L	11235275	11235276	ab	0.9	0.7	0.8
chr2L	11235360	11235361	ab	1.2	1.1	1.15
chr2L	11236573	11236574	ab	3.2	3	3.1
chr2L	11236585	11236586	ab	3.3	2.9	3.1
chr2L	11257476	11257477	ab	4.7	1.9	3.3
chr2L	11257788	11257789	ab	1.4	1.1	1.25
chr2L	112763	112764	Sam-S	0.4	0.3	0.35
chr2L	11279564	11279565	CG33695	2.8	3.1	2.95
chr2L	11280426	11280427	CR44182	0.8	0.6	0.7
chr2L	11281599	11281600	Ppt2	1.2	0.9	1.05
chr2L	11281793	11281794	Ppt2	1.4	1.1	1.25
chr2L	11282865	11282866	mre11	16.7	10	13.35
chr2L	11283620	11283621	mre11	3.7	2.1	2.9
chr2L	112916	112917	Sam-S	0.4	0.3	0.35
chr2L	113067	113068	Sam-S	0.3	0.6	0.45
chr2L	1131866	1131867	CG4552	3	1.7	2.35
chr2L	1131947	1131948	CG4552	3.6	2.2	2.9
chr2L	113234	113235	Sam-S	0.3	0.25	0.28
chr2L	113249	113250	Sam-S	0.3	0.8	0.55
chr2L	1132700	1132701	Iris	4.4	0.7	2.55
chr2L	1132896	1132897	Iris	1.1	0.6	0.85
chr2L	1132954	1132955	Iris	0.9	0.9	0.9
chr2L	1133070	1133071	Iris	0.8	0.8	0.8
chr2L	1133799	1133800	Iris	2.2	2.2	2.2
chr2L	113537	113538	Sam-S	0.5	0.2	0.35
chr2L	113601	113602	Sam-S	0.2	0.1	0.15
chr2L	113694	113695	Sam-S	0.85	1.15	1
chr2L	113762	113763	Sam-S	0.2	0.2	0.2
chr2L	113843	113844	Sam-S	0.2	0.2	0.2
chr2L	113900	113901	Sam-S	0.4	0.2	0.3
chr2L	113932	113933	Sam-S	0.2	0.1	0.15
chr2L	113986	113987	Sam-S	0.22	0.2	0.21
chr2L	1139948	1139949	CG4577	0.6	0.55	0.57
chr2L	114033	114034	Sam-S	0.3	0.3	0.3
chr2L	1140359	1140360	CG4577	0.1	0.1	0.1
chr2L	1140369	1140370	CG4577	0.28	0.2	0.24
chr2L	1140445	1140446	CG4577	0.1	0.1	0.1
chr2L	1140548	1140549	CG4577	0.1	0.1	0.1
chr2L	1140575	1140576	CG4577	0.2	0.2	0.2
chr2L	1140630	1140631	CG4577	0.1	0.1	0.1
chr2L	1140666	1140667	CG4577	0.4	0.85	0.62
chr2L	1140685	1140686	CG4577	0.35	0.1	0.22
chr2L	1140698	1140699	CG4577	14.2	7.8	11
chr2L	1140700	1140701	CG4577	0.2	0.2	0.2
chr2L	1140702	1140703	CG4577	0.2	0.2	0.2
chr2L	1140706	1140707	CG4577	0.2	0.25	0.22
chr2L	1140720	1140721	CG4577	0.1	0.1	0.1
chr2L	1140728	1140729	CG4577	1.2	0.7	0.95
chr2L	1140729	1140730	CG4577	0.2	0.3	0.25
chr2L	1140737	1140738	CG4577	0.2	0.2	0.2
chr2L	1140748	1140749	CG4577	0.4	0.45	0.43
chr2L	1140778	1140779	CG4577	0.8	0.4	0.6
chr2L	1140779	1140780	CG4577	0.1	0.1	0.1
chr2L	114079	114080	Sam-S	0.5	0.3	0.4
chr2L	1140843	1140844	CG4577	0.1	0.2	0.15
chr2L	1140902	1140903	CG4577	0.6	0.3	0.45
chr2L	1140920	1140921	CG4577	1	0.7	0.85
chr2L	114094	114095	Sam-S	0.3	0.2	0.25
chr2L	114232	114233	Sam-S	0.6	0.6	0.6
chr2L	114341	114342	Sam-S	0.3	0.3	0.3
chr2L	1148573	1148574	CG4749	8.3	7.7	8
chr2L	1150415	1150416	Tfb4	12.5	5.6	9.05
chr2L	11523312	11523313	CG31705	1.1	0.9	1
chr2L	11523319	11523320	CG31705	1.8	2.7	2.25
chr2L	11523324	11523325	CG31705	2	2	2
chr2L	11523337	11523338	CG31705	0.7	0.6	0.65
chr2L	11524033	11524034	CG31705	0.18	0.2	0.19
chr2L	1152414	1152415	capt	0.6	0.5	0.55
chr2L	1152423	1152424	capt	0.9	0.7	0.8
chr2L	11529420	11529421	CG31706	6.3	1.3	3.8
chr2L	11529555	11529556	CG31706	0.5	0.5	0.5
chr2L	11529559	11529560	CG31706	0.2	0.2	0.2
chr2L	11529888	11529889	CG31706	0.1	0.1	0.1
chr2L	11530137	11530138	CG31706	0.2	0.1	0.15
chr2L	11530938	11530939	CG31706	0.1	0.1	0.1
chr2L	1153450	1153451	capt	1.9	1	1.45
chr2L	1158864	1158865	Tango14	2.9	2	2.45
chr2L	1160315	1160316	CG5080	2.1	1.9	2
chr2L	1160328	1160329	CG5080	0.7	0.7	0.7
chr2L	1160396	1160397	CG5080	0.4	0.8	0.6
chr2L	1160546	1160547	CG5080	0.3	0.7	0.5
chr2L	1161547	1161548	CG5080	0.8	0.7	0.75
chr2L	1161663	1161664	CG5080	1.2	1.3	1.25
chr2L	1161757	1161758	CG5080	1.2	2.1	1.65
chr2L	1161816	1161817	CG5080	1.2	2.4	1.8
chr2L	1161952	1161953	CG5080	1.3	1.2	1.25
chr2L	11626437	11626438	kek2	2.2	1.3	1.75
chr2L	1166763	1166764	CG14341	1.7	1.2	1.45
chr2L	1167087	1167088	CG14341	1.2	0.9	1.05
chr2L	1167116	1167117	CG14341	1	1.8	1.4
chr2L	1168328	1168329	Plap	20	13.3	16.65
chr2L	1171034	1171035	CG5118	2.2	1.5	1.85
chr2L	1171169	1171170	CG5118	1.4	2	1.7
chr2L	117263	117264	CG4822	1.7	1.1	1.4
chr2L	117366	117367	CG4822	3	1.4	2.2
chr2L	117392	117393	CG4822	1.9	1.2	1.55
chr2L	117517	117518	CG11455	2.3	2	2.15
chr2L	117532	117533	CG4822	1.8	1.9	1.85
chr2L	117573	117574	CG11455	1.3	1.2	1.25
chr2L	117633	117634	CG11455	1.7	1.1	1.4
chr2L	1176602	1176603	CG4887	1.1	0.7	0.9
chr2L	117666	117667	CG11455	2.3	2.7	2.5
chr2L	1176707	1176708	CG4887	1.3	1.4	1.35
chr2L	117673	117674	CG11455	1.5	2.1	1.8
chr2L	1177055	1177056	CG4887	0.8	1	0.9
chr2L	1177301	1177302	CG4887	0.7	0.6	0.65
chr2L	117863	117864	CG11455	3	1.2	2.1
chr2L	117918	117919	CG11455	3	1.2	2.1
chr2L	11794524	11794525	crol	0.3	0.5	0.4
chr2L	11794640	11794641	crol	0.5	0.4	0.45
chr2L	11794744	11794745	crol	1.1	0.5	0.8
chr2L	11794768	11794769	crol	0.5	0.4	0.45
chr2L	11794786	11794787	crol	0.7	0.6	0.65
chr2L	11794889	11794890	crol	0.9	0.9	0.9
chr2L	11794908	11794909	crol	0.8	0.8	0.8
chr2L	11795078	11795079	crol	2.2	1.7	1.95
chr2L	11795239	11795240	crol	0.9	0.9	0.9
chr2L	11795290	11795291	crol	0.6	0.6	0.6
chr2L	11795328	11795329	crol	0.6	0.5	0.55
chr2L	11795335	11795336	crol	0.6	0.7	0.65
chr2L	11795344	11795345	crol	0.6	0.7	0.65
chr2L	11795427	11795428	crol	0.4	0.8	0.6
chr2L	11795842	11795843	crol	0.9	1.4	1.15
chr2L	11800437	11800438	crol	0.8	1.1	0.95
chr2L	11801079	11801080	crol	1.3	1.5	1.4
chr2L	11801169	11801170	crol	4.5	1.6	3.05
chr2L	11810218	11810219	CycY	1.7	1.9	1.8
chr2L	11810334	11810335	CycY	1.4	1.2	1.3
chr2L	11810721	11810722	CycY	1.2	0.9	1.05
chr2L	11811303	11811304	CycY	3.8	2	2.9
chr2L	11811333	11811334	CycY	2.6	1.8	2.2
chr2L	11814291	11814292	Pde1c	0.4	0.6	0.5
chr2L	11814331	11814332	Pde1c	0.3	0.3	0.3
chr2L	11814394	11814395	Pde1c	0.3	0.3	0.3
chr2L	11814453	11814454	Pde1c	0.3	0.3	0.3
chr2L	11814480	11814481	Pde1c	2.1	0.4	1.25
chr2L	11814487	11814488	Pde1c	0.3	0.3	0.3
chr2L	11814790	11814791	Pde1c	0.4	1.1	0.75
chr2L	11814798	11814799	Pde1c	0.5	0.6	0.55
chr2L	11814836	11814837	Pde1c	0.7	0.8	0.75
chr2L	11814865	11814866	Pde1c	0.7	2.3	1.5
chr2L	11814991	11814992	Pde1c	1	0.9	0.95
chr2L	11815061	11815062	Pde1c	0.9	0.7	0.8
chr2L	11815556	11815557	Pde1c	0.9	2.2	1.55
chr2L	11815647	11815648	Pde1c	0.8	0.8	0.8
chr2L	11816247	11816248	Pde1c	2.4	1.5	1.95
chr2L	1181895	1181896	CG4896	2.2	0.8	1.5
chr2L	1182074	1182075	CG4896	1	1.4	1.2
chr2L	1182318	1182319	CG5126	1.9	0.6	1.25
chr2L	118300	118301	CG11455	3.2	2.2	2.7
chr2L	11840772	11840773	CG31704	1.6	0.4	1
chr2L	11841878	11841879	CG44008	1.9	1.3	1.6
chr2L	11841878	11841879	Pde1c	1.9	1.3	1.6
chr2L	11841915	11841916	CG44008	1.1	0.9	1
chr2L	11841915	11841916	Pde1c	1.1	0.9	1
chr2L	11841970	11841971	CG44008	0.5	0.2	0.35
chr2L	11841970	11841971	Pde1c	0.5	0.2	0.35
chr2L	11842114	11842115	CG44008	0.8	0.4	0.6
chr2L	11842114	11842115	Pde1c	0.8	0.4	0.6
chr2L	11843101	11843102	Pde1c	0.5	0.4	0.45
chr2L	11843173	11843174	Pde1c	0.4	0.6	0.5
chr2L	11843185	11843186	CG14933	0.4	0.2	0.3
chr2L	11843185	11843186	CG42486	0.4	0.2	0.3
chr2L	11843202	11843203	CG14933	0.42	0.1	0.26
chr2L	11843202	11843203	CG42486	0.42	0.1	0.26
chr2L	11843217	11843218	Pde1c	0.6	0.1	0.35
chr2L	11843222	11843223	CG14933	0.1	0.4	0.25
chr2L	11843222	11843223	CG42486	0.1	0.4	0.25
chr2L	11843294	11843295	CG14933	0.2	0.32	0.26
chr2L	11843294	11843295	CG42486	0.2	0.32	0.26
chr2L	11843363	11843364	CG14933	0.2	0.2	0.2
chr2L	11843363	11843364	CG42486	0.2	0.2	0.2
chr2L	11843420	11843421	CG14933	0.2	0.4	0.3
chr2L	11843420	11843421	CG42486	0.2	0.4	0.3
chr2L	11843421	11843422	CG14933	0.4	0.1	0.25
chr2L	11843421	11843422	CG42486	0.4	0.1	0.25
chr2L	11843462	11843463	CG14933	0.2	0.3	0.25
chr2L	11843462	11843463	CG42486	0.2	0.3	0.25
chr2L	11843470	11843471	CG14933	0.3	0.2	0.25
chr2L	11843470	11843471	CG42486	0.3	0.2	0.25
chr2L	11843482	11843483	CG14933	0.85	0.35	0.6
chr2L	11843482	11843483	CG42486	0.85	0.35	0.6
chr2L	11843707	11843708	CG14933	1.7	0.3	1
chr2L	11843707	11843708	CG42486	1.7	0.3	1
chr2L	11843727	11843728	CG14933	1.8	1.5	1.65
chr2L	11843727	11843728	CG42486	1.8	1.5	1.65
chr2L	11843802	11843803	Pde1c	1.7	0.8	1.25
chr2L	11843833	11843834	Pde1c	0.7	0.6	0.65
chr2L	11843844	11843845	CG14933	0.7	0.3	0.5
chr2L	11843844	11843845	CG42486	0.7	0.3	0.5
chr2L	11843862	11843863	CG14933	0.8	0.3	0.55
chr2L	11843862	11843863	CG42486	0.8	0.3	0.55
chr2L	11843954	11843955	Pde1c	1.1	0.5	0.8
chr2L	11850766	11850767	Mal-B2	2.2	2.9	2.55
chr2L	11851034	11851035	Pde1c	1.6	1.1	1.35
chr2L	11851096	11851097	Pde1c	1.7	1.1	1.4
chr2L	11851249	11851250	Pde1c	1.7	1.2	1.45
chr2L	11851862	11851863	Mal-B2	1.5	0.8	1.15
chr2L	11851954	11851955	Pde1c	1.5	1.1	1.3
chr2L	11851994	11851995	Pde1c	0.9	1.4	1.15
chr2L	11852520	11852521	Pde1c	1.8	1.3	1.55
chr2L	119047	119048	CG11455	3.4	3.8	3.6
chr2L	11985493	11985494	CG6686	1.6	1.1	1.35
chr2L	11998145	11998146	CG18787	12.5	6.3	9.4
chr2L	12000512	12000513	CG12264	1.5	1.1	1.3
chr2L	12001203	12001204	CG12264	1.9	1.9	1.9
chr2L	12001702	12001703	CG6746	1.8	0.9	1.35
chr2L	12001858	12001859	CG6746	1.8	0.7	1.25
chr2L	12002035	12002036	CG6746	1	1.7	1.35
chr2L	12008498	12008499	Rh5	1.8	0.5	1.15
chr2L	12036536	12036537	Tom70	2.4	1.1	1.75
chr2L	12039550	12039551	CG6766	2.7	0.9	1.8
chr2L	12040017	12040018	CG6766	1.1	0.7	0.9
chr2L	12040617	12040618	CG6766	1.8	1.2	1.5
chr2L	12045346	12045347	CG6770	0.5	1.4	0.95
chr2L	12045388	12045389	CG6770	0.1	0.1	0.1
chr2L	12045392	12045393	CG6770	0.4	0.3	0.35
chr2L	12045397	12045398	CG6770	0.1	0.1	0.1
chr2L	12045405	12045406	CG6770	0.1	0.1	0.1
chr2L	12045421	12045422	CG6770	0.2	0	0.1
chr2L	12045485	12045486	CG6770	0	0.1	0.05
chr2L	12045486	12045487	CG6770	0	0.1	0.05
chr2L	12045490	12045491	CG6770	0.1	0.1	0.1
chr2L	12045496	12045497	CG6770	0	0	0
chr2L	12045497	12045498	CG6770	0.02	0.02	0.02
chr2L	12045505	12045506	CG6770	0	0.1	0.05
chr2L	12045516	12045517	CG6770	0.02	0.02	0.02
chr2L	12045521	12045522	CG6770	0.02	0	0.01
chr2L	12045524	12045525	CG6770	0	0	0
chr2L	12045527	12045528	CG6770	0.25	0.2	0.22
chr2L	12045588	12045589	CG6770	0.05	0.1	0.08
chr2L	12045684	12045685	CG6770	0.02	0.1	0.06
chr2L	12045991	12045992	CG6770	0.1	0	0.05
chr2L	12046029	12046030	CG6770	0.08	0	0.04
chr2L	12046078	12046079	CG6770	0	0.1	0.05
chr2L	12049601	12049602	CG14945	3.7	2.4	3.05
chr2L	12050322	12050323	CG14945	0.9	1.3	1.1
chr2L	12050810	12050811	CG14945	0.7	0.6	0.65
chr2L	12050821	12050822	CG14945	1.3	0.6	0.95
chr2L	12050962	12050963	CG14945	1.7	0.7	1.2
chr2L	12051131	12051132	CG14945	0.4	0.3	0.35
chr2L	12051326	12051327	CG14945	1	0.8	0.9
chr2L	12051339	12051340	CG14945	0.5	0.4	0.45
chr2L	12051525	12051526	CG14945	0.5	0.9	0.7
chr2L	12051866	12051867	CG14945	0.5	1.7	1.1
chr2L	12051920	12051921	JhI-21	0.4	0.4	0.4
chr2L	12051933	12051934	CG14945	0.5	1.3	0.9
chr2L	12056681	12056682	CG34164	0.9	0.6	0.75
chr2L	12056681	12056682	RpL7-like	0.9	0.6	0.75
chr2L	12056806	12056807	CG34164	1.8	1.3	1.55
chr2L	12056806	12056807	RpL7-like	1.8	1.3	1.55
chr2L	12056841	12056842	CG34164	0.6	0.5	0.55
chr2L	12056841	12056842	RpL7-like	0.6	0.5	0.55
chr2L	12057003	12057004	CG34164	0.6	0.5	0.55
chr2L	12057003	12057004	RpL7-like	0.6	0.5	0.55
chr2L	12057096	12057097	CG34164	1.9	0.6	1.25
chr2L	12057096	12057097	RpL7-like	1.9	0.6	1.25
chr2L	12057107	12057108	CG34164	1.3	0.9	1.1
chr2L	12057107	12057108	RpL7-like	1.3	0.9	1.1
chr2L	12057301	12057302	CG34164	0.6	1.9	1.25
chr2L	12057301	12057302	RpL7-like	0.6	1.9	1.25
chr2L	12064398	12064399	CG14946	3.1	2.3	2.7
chr2L	12093858	12093859	Pex19	0.3	0.2	0.25
chr2L	12093890	12093891	Pex19	1.1	0.2	0.65
chr2L	12094599	12094600	Pex19	2.7	1.1	1.9
chr2L	12095167	12095168	Pex19	2.1	1.9	2
chr2L	12095965	12095966	CG6712	3.8	2.9	3.35
chr2L	12100513	12100514	Ced-12	2.4	2.1	2.25
chr2L	12100910	12100911	Patsas	3.3	1.7	2.5
chr2L	12101402	12101403	Patsas	4	4	4
chr2L	12102034	12102035	Patsas	3.8	3.6	3.7
chr2L	12106004	12106005	Aats-thr	1.5	0.8	1.15
chr2L	12106019	12106020	Aats-thr	1.6	0.9	1.25
chr2L	12106705	12106706	Aats-thr	1.6	1	1.3
chr2L	12106708	12106709	Aats-thr	1.6	0.6	1.1
chr2L	12106744	12106745	Aats-thr	1.8	0.7	1.25
chr2L	12108950	12108951	Rab6	4.2	3.9	4.05
chr2L	12109084	12109085	Rab6	2.9	1.7	2.3
chr2L	12168221	12168222	CG31760	8.3	5.6	6.95
chr2L	12169439	12169440	CG31760	2.3	1.6	1.95
chr2L	12169965	12169966	CG31760	2.2	0.7	1.45
chr2L	12170182	12170183	CG31760	1.6	1.2	1.4
chr2L	12170248	12170249	CG31760	1.4	1.2	1.3
chr2L	12170335	12170336	CG31760	2.7	0.6	1.65
chr2L	12170336	12170337	CG31760	0.7	0.6	0.65
chr2L	12170357	12170358	CG31760	0.7	1.2	0.95
chr2L	12170380	12170381	CG31760	1	1.5	1.25
chr2L	12170446	12170447	CG31760	2.2	3.1	2.65
chr2L	12175540	12175541	atilla	0.6	0.5	0.55
chr2L	12176834	12176835	atilla	0.6	0.4	0.5
chr2L	12176892	12176893	aret	0.6	0.4	0.5
chr2L	12222328	12222329	aret	2.8	2.5	2.65
chr2L	12241004	12241005	aret	0.7	0.8	0.75
chr2L	12241012	12241013	aret	1.4	0.8	1.1
chr2L	12241176	12241177	aret	1.2	1.1	1.15
chr2L	12241455	12241456	aret	2.2	2.2	2.2
chr2L	12241656	12241657	aret	2.3	1.7	2
chr2L	122886	122887	CG11455	0.5	0.2	0.35
chr2L	122886	122887	CR44969	0.5	0.2	0.35
chr2L	122893	122894	CG3164	0.2	0.1	0.15
chr2L	122905	122906	CG11455	0.2	0.4	0.3
chr2L	122905	122906	CR44969	0.2	0.4	0.3
chr2L	122942	122943	CG11455	0.2	0.1	0.15
chr2L	122942	122943	CR44969	0.2	0.1	0.15
chr2L	122958	122959	CG3164	0.5	0.2	0.35
chr2L	122978	122979	CG11455	0.6	0.5	0.55
chr2L	122978	122979	CR44969	0.6	0.5	0.55
chr2L	123003	123004	CG11455	0.5	0.4	0.45
chr2L	123003	123004	CR44969	0.5	0.4	0.45
chr2L	123017	123018	CG11455	0.5	0.82	0.66
chr2L	123017	123018	CR44969	0.5	0.82	0.66
chr2L	123042	123043	CG11455	1.1	0.8	0.95
chr2L	123042	123043	CR44969	1.1	0.8	0.95
chr2L	123045	123046	CG11455	1.5	0.7	1.1
chr2L	123045	123046	CR44969	1.5	0.7	1.1
chr2L	123050	123051	CG3164	1	0.3	0.65
chr2L	123053	123054	CG3164	0.5	0.3	0.4
chr2L	12312735	12312736	aret	6.9	3	4.95
chr2L	12313273	12313274	aret	2.2	3.1	2.65
chr2L	12313276	12313277	aret	3.2	3.7	3.45
chr2L	123160	123161	CG11455	1.6	1	1.3
chr2L	123160	123161	CR44969	1.6	1	1.3
chr2L	123162	123163	CG11455	0.3	0.2	0.25
chr2L	123162	123163	CR44969	0.3	0.2	0.25
chr2L	123192	123193	CG11455	0.6	0.2	0.4
chr2L	123192	123193	CR44969	0.6	0.2	0.4
chr2L	123260	123261	CG11455	0.4	0.1	0.25
chr2L	123260	123261	CR44969	0.4	0.1	0.25
chr2L	123405	123406	CG11455	0.7	0.4	0.55
chr2L	123405	123406	CR44969	0.7	0.4	0.55
chr2L	123501	123502	CG11455	0.8	0.5	0.65
chr2L	123501	123502	CR44969	0.8	0.5	0.65
chr2L	123518	123519	CG11455	0.3	0.4	0.35
chr2L	123518	123519	CR44969	0.3	0.4	0.35
chr2L	123728	123729	CG11455	0.4	0.3	0.35
chr2L	123728	123729	CR44969	0.4	0.3	0.35
chr2L	123743	123744	CG11455	0.4	0.5	0.45
chr2L	123743	123744	CR44969	0.4	0.5	0.45
chr2L	123758	123759	CG11455	0.3	0.28	0.29
chr2L	123758	123759	CR44969	0.3	0.28	0.29
chr2L	123868	123869	CG11455	0.3	0.2	0.25
chr2L	123868	123869	CR44969	0.3	0.2	0.25
chr2L	123906	123907	CG11455	0.38	0.2	0.29
chr2L	123906	123907	CR44969	0.38	0.2	0.29
chr2L	123908	123909	CG11455	0.4	0.2	0.3
chr2L	123908	123909	CR44969	0.4	0.2	0.3
chr2L	12396741	12396742	bru-2	8.3	8.3	8.3
chr2L	12403688	12403689	vir-1	0.3	0.4	0.35
chr2L	12403948	12403949	vir-1	0.6	0.3	0.45
chr2L	12404120	12404121	vir-1	3	1.4	2.2
chr2L	12407139	12407140	vir-1	0.2	0.1	0.15
chr2L	12407153	12407154	vir-1	0.3	0.1	0.2
chr2L	12407181	12407182	vir-1	0.1	0.1	0.1
chr2L	12407194	12407195	vir-1	0.1	0.1	0.1
chr2L	12407248	12407249	vir-1	0.1	0.1	0.1
chr2L	12409613	12409614	vir-1	0.1	0.1	0.1
chr2L	124110	124111	CG11455	0.5	0.3	0.4
chr2L	1241783	1241784	CG5397	1.5	1.9	1.7
chr2L	1241809	1241810	CG5397	1.5	1.7	1.6
chr2L	124194	124195	CG11455	1.3	1.5	1.4
chr2L	12421709	12421710	vir-1	0.6	0.4	0.5
chr2L	12421748	12421749	vir-1	0.1	0.2	0.15
chr2L	12426956	12426957	CG5446	3.4	2.5	2.95
chr2L	12427278	12427279	CG5446	2.4	0.9	1.65
chr2L	12432085	12432086	SC35	1.7	1.1	1.4
chr2L	12432101	12432102	SC35	1.4	1.1	1.25
chr2L	12439197	12439198	Elf	5	4	4.5
chr2L	12439935	12439936	Elf	1.7	1.9	1.8
chr2L	12440173	12440174	Elf	3.6	1.1	2.35
chr2L	12455798	12455799	bun	0.1	0.1	0.1
chr2L	12455799	12455800	bun	0.2	0.1	0.15
chr2L	12455819	12455820	bun	0.2	0.2	0.2
chr2L	12455867	12455868	bun	0.1	0.1	0.1
chr2L	12455912	12455913	bun	0.2	0.2	0.2
chr2L	12455913	12455914	bun	0.12	0.1	0.11
chr2L	12455923	12455924	bun	0.2	0.1	0.15
chr2L	12456191	12456192	bun	0.1	0.1	0.1
chr2L	12456248	12456249	bun	0.3	0.1	0.2
chr2L	12456261	12456262	bun	0.1	0.2	0.15
chr2L	12456311	12456312	bun	0.2	0.1	0.15
chr2L	12456312	12456313	bun	0.1	0.4	0.25
chr2L	12456333	12456334	bun	0.1	0.25	0.18
chr2L	12456351	12456352	bun	0.1	0.1	0.1
chr2L	12456368	12456369	bun	0.2	0.1	0.15
chr2L	12456390	12456391	bun	0.1	0.1	0.1
chr2L	12456395	12456396	bun	0.2	0.2	0.2
chr2L	12456406	12456407	bun	0.1	0.1	0.1
chr2L	12456436	12456437	bun	0.1	0.1	0.1
chr2L	12456441	12456442	bun	0.2	0.1	0.15
chr2L	12456449	12456450	bun	0.1	0.1	0.1
chr2L	12456453	12456454	bun	0.1	0.1	0.1
chr2L	12456456	12456457	bun	0.1	0.1	0.1
chr2L	12456473	12456474	bun	0.1	0.1	0.1
chr2L	12456477	12456478	bun	0.3	0.1	0.2
chr2L	12456478	12456479	bun	0.6	0.2	0.4
chr2L	12456479	12456480	bun	1.1	0.7	0.9
chr2L	12456487	12456488	bun	0.1	0.1	0.1
chr2L	12456501	12456502	bun	0.1	0.1	0.1
chr2L	12456512	12456513	bun	0.1	0.2	0.15
chr2L	12456524	12456525	bun	0.1	0.1	0.1
chr2L	12456533	12456534	bun	0.4	0.2	0.3
chr2L	12456534	12456535	bun	0.1	0.4	0.25
chr2L	12456535	12456536	bun	0.1	0.5	0.3
chr2L	12456612	12456613	bun	0.2	0.2	0.2
chr2L	12456623	12456624	bun	0.2	0.2	0.2
chr2L	12456626	12456627	bun	0.2	0.2	0.2
chr2L	12456640	12456641	bun	0.4	0.2	0.3
chr2L	12456677	12456678	bun	0.1	0.2	0.15
chr2L	12456716	12456717	bun	0.1	0.1	0.1
chr2L	12456722	12456723	bun	0.1	0.2	0.15
chr2L	12456734	12456735	bun	0.1	0.1	0.1
chr2L	12456741	12456742	bun	0.1	0.1	0.1
chr2L	12456745	12456746	bun	0.2	0.1	0.15
chr2L	12456766	12456767	bun	0.1	0.1	0.1
chr2L	12456771	12456772	bun	0.1	0.1	0.1
chr2L	12456779	12456780	bun	0.1	0.1	0.1
chr2L	12456800	12456801	bun	0.1	0.1	0.1
chr2L	12456808	12456809	bun	0.1	0.1	0.1
chr2L	12456814	12456815	bun	0.1	0.1	0.1
chr2L	12456848	12456849	bun	0.2	0.25	0.22
chr2L	12456853	12456854	bun	0.1	0.1	0.1
chr2L	12456856	12456857	bun	0.2	0.1	0.15
chr2L	12456870	12456871	bun	0.4	0.6	0.5
chr2L	12456924	12456925	bun	0.1	0.2	0.15
chr2L	12456934	12456935	bun	0.3	0.1	0.2
chr2L	12456944	12456945	bun	0.1	0.18	0.14
chr2L	12457014	12457015	bun	0.2	0.1	0.15
chr2L	12457080	12457081	bun	0.3	0.3	0.3
chr2L	12457142	12457143	bun	0.2	0.2	0.2
chr2L	12457145	12457146	bun	0.2	0.2	0.2
chr2L	12457989	12457990	bun	0.4	0.3	0.35
chr2L	12458114	12458115	bun	0.3	0.3	0.3
chr2L	12460590	12460591	bun	0.2	0.2	0.2
chr2L	12460664	12460665	bun	0.2	0.5	0.35
chr2L	12460677	12460678	bun	0.2	0.2	0.2
chr2L	12460691	12460692	bun	0.3	0.3	0.3
chr2L	12460699	12460700	bun	0.4	0.3	0.35
chr2L	12460732	12460733	bun	0.6	0.3	0.45
chr2L	12460739	12460740	bun	0.3	0.3	0.3
chr2L	12460751	12460752	bun	0.3	0.2	0.25
chr2L	12460754	12460755	bun	0.7	0.2	0.45
chr2L	12460757	12460758	bun	0.3	0.2	0.25
chr2L	12460764	12460765	bun	0.3	0.2	0.25
chr2L	12460784	12460785	bun	1.4	0.7	1.05
chr2L	12460792	12460793	bun	0.2	0.2	0.2
chr2L	12460800	12460801	bun	0.2	0.2	0.2
chr2L	12460801	12460802	bun	0.2	0.2	0.2
chr2L	12460885	12460886	bun	0.2	0.2	0.2
chr2L	12460890	12460891	bun	0.4	0.4	0.4
chr2L	12460913	12460914	bun	0.2	0.2	0.2
chr2L	12460940	12460941	bun	0.3	0.3	0.3
chr2L	12460968	12460969	bun	1.3	0.8	1.05
chr2L	12461004	12461005	bun	0.3	0.2	0.25
chr2L	12461016	12461017	bun	0.6	0.7	0.65
chr2L	12461038	12461039	bun	0.4	1.2	0.8
chr2L	12461058	12461059	bun	0.3	0.2	0.25
chr2L	12461077	12461078	bun	0.2	0.3	0.25
chr2L	12461086	12461087	bun	0.6	0.3	0.45
chr2L	12498671	12498672	bun	8.3	9.1	8.7
chr2L	12508246	12508247	CR43051	0.9	3.8	2.35
chr2L	12508246	12508247	snoRNA:CG43051-a	0.9	3.8	2.35
chr2L	12508275	12508276	bun	0.8	3.2	2
chr2L	12508280	12508281	bun	1.7	3.4	2.55
chr2L	12508409	12508410	bun	2.4	2.2	2.3
chr2L	125240	125241	CG3164	1.3	0.7	1
chr2L	12690677	12690678	CG5525	0.9	0.8	0.85
chr2L	12693391	12693392	CG6153	3.8	3.8	3.8
chr2L	12693835	12693836	CG6153	3.7	2.8	3.25
chr2L	12698428	12698429	PICK1	1.4	1.3	1.35
chr2L	12705911	12705912	spict	5.4	2	3.7
chr2L	12708239	12708240	CG6180	0.7	0.3	0.5
chr2L	12708506	12708507	CG6180	0.55	0.58	0.56
chr2L	12709044	12709045	CG5787	3.2	3.3	3.25
chr2L	12713794	12713795	Pih1D1	1.1	0.7	0.9
chr2L	12713805	12713806	Pih1D1	1.8	0.6	1.2
chr2L	12714100	12714101	Pih1D1	3.1	2.1	2.6
chr2L	12726178	12726179	MRP	14.3	11.1	12.7
chr2L	12729965	12729966	MRP	5	5	5
chr2L	12739149	12739150	MRP	1.2	1.2	1.2
chr2L	12744365	12744366	MRP	0.9	0.7	0.8
chr2L	12744416	12744417	MRP	0.7	0.7	0.7
chr2L	12744586	12744587	MRP	0.8	0.8	0.8
chr2L	12817171	12817172	kek1	0.5	0.4	0.45
chr2L	12817258	12817259	kek1	0.8	1.8	1.3
chr2L	12817345	12817346	kek1	7.7	5	6.35
chr2L	12817448	12817449	kek1	2.4	1.5	1.95
chr2L	12817457	12817458	kek1	0.8	0.7	0.75
chr2L	12817612	12817613	kek1	1.1	1.1	1.1
chr2L	12817626	12817627	kek1	0.9	0.7	0.8
chr2L	12817699	12817700	kek1	0.8	0.7	0.75
chr2L	12817723	12817724	kek1	0.9	1.1	1
chr2L	12818606	12818607	kek1	0.7	0.7	0.7
chr2L	12818813	12818814	kek1	0.6	1.1	0.85
chr2L	12819181	12819182	kek1	2.6	2.4	2.5
chr2L	12819469	12819470	kek1	2	2.9	2.45
chr2L	12819523	12819524	kek1	3.7	2.9	3.3
chr2L	12820009	12820010	kek1	3.7	1.5	2.6
chr2L	12820040	12820041	kek1	3.3	3.4	3.35
chr2L	12821655	12821656	kek1	1.4	1.2	1.3
chr2L	12821798	12821799	kek1	1.8	0.6	1.2
chr2L	12821824	12821825	kek1	0.5	1.1	0.8
chr2L	12821840	12821841	kek1	0.6	0.6	0.6
chr2L	12821876	12821877	kek1	0.5	1.8	1.15
chr2L	12821972	12821973	kek1	0.6	0.7	0.65
chr2L	12821984	12821985	kek1	0.3	0.6	0.45
chr2L	12821986	12821987	kek1	1	1	1
chr2L	12822014	12822015	kek1	0.7	0.3	0.5
chr2L	12822031	12822032	kek1	0.6	0.6	0.6
chr2L	12822034	12822035	kek1	0.3	0.3	0.3
chr2L	12822039	12822040	kek1	0.3	0.3	0.3
chr2L	12822104	12822105	kek1	1.1	0.7	0.9
chr2L	12822107	12822108	kek1	0.55	0.55	0.55
chr2L	12822113	12822114	kek1	1.3	0.8	1.05
chr2L	12822141	12822142	kek1	0.6	1.2	0.9
chr2L	12822292	12822293	kek1	1.4	1.3	1.35
chr2L	12822296	12822297	kek1	1.5	1.1	1.3
chr2L	12822302	12822303	kek1	0.4	0.3	0.35
chr2L	12822321	12822322	kek1	0.3	0.9	0.6
chr2L	12822323	12822324	kek1	0.3	0.3	0.3
chr2L	12822356	12822357	kek1	0.4	0.5	0.45
chr2L	12822484	12822485	kek1	2.2	0.8	1.5
chr2L	12822507	12822508	kek1	0.7	0.3	0.5
chr2L	12822508	12822509	kek1	0.7	1.5	1.1
chr2L	12822567	12822568	kek1	0.2	0.2	0.2
chr2L	12822578	12822579	kek1	0.3	0.2	0.25
chr2L	12822582	12822583	kek1	0.7	0.4	0.55
chr2L	12822605	12822606	kek1	0.3	0.2	0.25
chr2L	12822619	12822620	kek1	0.3	0.3	0.3
chr2L	12822657	12822658	kek1	0.2	0.2	0.2
chr2L	128960	128961	CG3164	1.4	0.8	1.1
chr2L	129030	129031	CG3164	1.2	0.7	0.95
chr2L	129078	129079	CG11455	0.7	0.4	0.55
chr2L	1293910	1293911	robo3	1.6	0.9	1.25
chr2L	1294162	1294163	robo3	1.2	0.9	1.05
chr2L	1294217	1294218	robo3	3	1.1	2.05
chr2L	1294473	1294474	robo3	1.1	0.8	0.95
chr2L	1294493	1294494	robo3	1	0.8	0.9
chr2L	1294570	1294571	robo3	1.1	0.5	0.8
chr2L	12978387	12978388	Vha68-2	0.4	0.2	0.3
chr2L	12978457	12978458	Vha68-2	0.5	0.4	0.45
chr2L	12978506	12978507	Vha68-2	0.4	0.3	0.35
chr2L	12993922	12993923	CG12404	1.3	1.1	1.2
chr2L	12997515	12997516	CG12404	4.7	2.7	3.7
chr2L	13000452	13000453	CG12404	2.2	1.7	1.95
chr2L	13000861	13000862	Vha68-1	0.7	0.1	0.4
chr2L	13000872	13000873	Vha68-1	0.2	0.1	0.15
chr2L	13000958	13000959	Vha68-1	0.32	0.12	0.22
chr2L	13001100	13001101	Vha68-1	0.1	0.2	0.15
chr2L	13001106	13001107	Vha68-1	0.1	0.3	0.2
chr2L	13002872	13002873	Vha68-1	0.5	0.3	0.4
chr2L	13003199	13003200	Vha68-1	0.7	0.5	0.6
chr2L	13003688	13003689	Vha68-1	0.3	0.3	0.3
chr2L	13012951	13012952	Tor	1.9	2.5	2.2
chr2L	13012970	13012971	Tor	1.9	2.8	2.35
chr2L	13013624	13013625	CG9934	1.5	4.3	2.9
chr2L	13020315	13020316	A16	1.4	1.9	1.65
chr2L	13020338	13020339	A16	1.3	0.9	1.1
chr2L	13020556	13020557	A16	5.1	1.4	3.25
chr2L	13020939	13020940	A16	3	4.2	3.6
chr2L	13022002	13022003	CG9932	0.4	0.4	0.4
chr2L	13022187	13022188	CG9932	1.7	0.4	1.05
chr2L	13022188	13022189	CG9932	1.1	0.9	1
chr2L	13022280	13022281	CG9932	0.5	0.5	0.5
chr2L	13022291	13022292	CG9932	0.9	0.5	0.7
chr2L	13022558	13022559	CG9932	0.4	1.4	0.9
chr2L	13022810	13022811	CG9932	0.8	0.8	0.8
chr2L	13022945	13022946	CG9932	1.9	1.5	1.7
chr2L	13022967	13022968	CG9932	1.9	1.4	1.65
chr2L	13023007	13023008	CG9932	1.9	1.1	1.5
chr2L	13023509	13023510	CG9932	1.5	1.2	1.35
chr2L	13142527	13142528	CG9928	7.7	2.3	5
chr2L	13142535	13142536	CG9928	3	0.3	1.65
chr2L	13142578	13142579	CG9928	0.4	0.1	0.25
chr2L	13142581	13142582	CG9928	0.1	0.2	0.15
chr2L	13142592	13142593	CG9928	0.1	0.2	0.15
chr2L	13142660	13142661	CG9928	0.1	0.1	0.1
chr2L	13142847	13142848	CG9928	0.1	0.3	0.2
chr2L	13142872	13142873	CG9928	0.2	0.2	0.2
chr2L	13142881	13142882	CG9928	0.1	0.1	0.1
chr2L	13163324	13163325	DnaJ-H	0.6	0.5	0.55
chr2L	13163958	13163959	DnaJ-H	0.8	0.5	0.65
chr2L	13168450	13168451	Sir2	2.5	1.6	2.05
chr2L	13168563	13168564	Sir2	1.4	1	1.2
chr2L	13169072	13169073	Sir2	1.2	1	1.1
chr2L	13169254	13169255	Sir2	1.2	0.9	1.05
chr2L	13169856	13169857	Sfmbt	2	1.6	1.8
chr2L	13170085	13170086	Sfmbt	8.3	4.8	6.55
chr2L	13172969	13172970	Sfmbt	20	20	20
chr2L	13177335	13177336	CG5439	8.3	6.3	7.3
chr2L	13178633	13178634	CG5439	4	2.2	3.1
chr2L	13179498	13179499	CG5287	5.6	6.3	5.95
chr2L	13182934	13182935	CG5287	3.6	3.1	3.35
chr2L	13183427	13183428	CG5287	4.2	1.8	3
chr2L	13185091	13185092	CG16974	1.2	0.5	0.85
chr2L	13185105	13185106	CG16974	0.6	1.1	0.85
chr2L	13185116	13185117	CG16974	0.4	0.4	0.4
chr2L	13185171	13185172	CG16974	0.4	0.6	0.5
chr2L	13185265	13185266	CG16974	0.3	0.3	0.3
chr2L	13185280	13185281	CG16974	0.38	0.3	0.34
chr2L	13185951	13185952	CG16974	1	0.6	0.8
chr2L	13186119	13186120	CG16974	0.9	0.8	0.85
chr2L	13194715	13194716	Edem2	11.8	5.3	8.55
chr2L	13195883	13195884	Edem2	4.5	2.9	3.7
chr2L	13196351	13196352	Edem2	2.5	2.5	2.5
chr2L	13197334	13197335	CG16972	3.8	3.8	3.8
chr2L	13198111	13198112	CG16972	6.3	10	8.15
chr2L	13210366	13210367	Pect	0.4	0.3	0.35
chr2L	13210557	13210558	Pect	0.3	0.3	0.3
chr2L	13210661	13210662	Pect	1.6	1.2	1.4
chr2L	13210780	13210781	CG15482	0.7	0.5	0.6
chr2L	13210792	13210793	Pect	0.3	0.3	0.3
chr2L	13212631	13212632	kek4	2	1.1	1.55
chr2L	13216625	13216626	CG9426	1	2.2	1.6
chr2L	13216625	13216626	snRNA:U2:34ABb	1	2.2	1.6
chr2L	13216625	13216626	snRNA:U2:34ABc	1	2.2	1.6
chr2L	13216640	13216641	CG9426	1	1.4	1.2
[truncated: 55,429 more rows]

## Sheet: Only Lsm LsmAD Brain
chrom	start	end	Gene	Replicate 1 Edit Percentage	Replicate 2 Edit Percentage	Average Edit Percentage
[truncated: 43,296 more rows]

[truncated: 1 more sheets: Atx2 WT S2]
