# Supplementary material for: Antagonistic roles for Ataxin-2 structured and disordered domains in RNP condensation
Source: eLife. 2021 Mar 10;10:e60326. doi: 10.7554/eLife.60326 (PMC7946432; doi:10.7554/eLife.60326)
Supplement: Table 1—source data 1. [file elife-60326-table1-data1.xlsx]

## Sheet: Molecular Function
GO_term	GO_id	Brain (%)	Targets (%)	Expected	over/under	fold Enrichment	raw P-value	FDR
solute:sodium symporter activity	GO:0015370	0.176548	1.95312	0.48	+	10.39	0.000341	0.0351
protein tyrosine/serine/threonine phosphatase activity	GO:0008138	0.0735619	1.5625	0.2	+	19.94	0.000231	0.0249
MAP kinase phosphatase activity	GO:0033549	0.0147124	1.17188	0.04	+	74.78	0.000219	0.0248
organic cation transmembrane transporter activity	GO:0015101	0.0441371	1.5625	0.12	+	33.24	6.82e-05	0.00965
cation:chloride symporter activity	GO:0015377	0.0441371	1.5625	0.12	+	33.24	6.82e-05	0.00908
protein tyrosine phosphatase activity	GO:0004725	0.205973	2.34375	0.56	+	10.68	7.43e-05	0.00885
anion:cation symporter activity	GO:0015296	0.0441371	1.5625	0.12	+	33.24	6.82e-05	0.00857
phosphatase activity	GO:0016791	0.853318	4.29688	2.33	+	4.73	5.27e-05	0.00794
phosphoprotein phosphatase activity	GO:0004721	0.500221	3.51562	1.36	+	6.6	2.77e-05	0.0057
sodium:chloride symporter activity	GO:0015378	0.0294247	1.5625	0.08	+	49.86	3.01e-05	0.00568
anion:sodium symporter activity	GO:0015373	0.0294247	1.5625	0.08	+	49.86	3.01e-05	0.00525
monoamine transmembrane transporter activity	GO:0008504	0.0294247	1.5625	0.08	+	49.86	3.01e-05	0.00487
phosphoric ester hydrolase activity	GO:0042578	1.074	5.07812	2.93	+	4.44	1.95e-05	0.00442
organic hydroxy compound transmembrane transporter activity	GO:1901618	0.0147124	1.5625	0.04	+	99.71	1.04e-05	0.0026
G protein-coupled receptor binding	GO:0001664	0.411946	3.90625	1.12	+	8.9	1.03e-06	0.000292
neuropeptide receptor binding	GO:0071855	0.102987	2.73438	0.28	+	24.93	3.06e-07	0.000115
receptor ligand activity	GO:0048018	0.55907	4.6875	1.52	+	7.87	2.47e-07	0.000112
signaling receptor activator activity	GO:0030546	0.573783	4.6875	1.56	+	7.67	3.13e-07	0.000101
receptor regulator activity	GO:0030545	0.588495	5.07812	1.6	+	8.1	5.75e-08	3.25e-05
hormone activity	GO:0005179	0.30896	4.29688	0.84	+	13.06	1.29e-08	1.46e-05
signaling receptor binding	GO:0005102	2.13329	9.375	5.82	+	4.13	1.61e-08	1.22e-05
neuropeptide hormone activity	GO:0005184	0.235398	4.29688	0.64	+	17.14	1.54e-09	3.49e-06

## Sheet: Biological Process
GO_term	GO_id	Brain (%)	Targets (%)	Expected	over/under	fold Enrichment	raw P-value	FDR
protein dephosphorylation	GO:0006470	0.529645	3.90625	1.44	+	6.92	6.81e-06	0.0157
cell communication	GO:0007154	11.5639	21.875	31.53	+	1.78	1.35e-05	0.0155
signal transduction	GO:0007165	8.59203	17.9688	23.43	+	1.96	8.67e-06	0.012
dephosphorylation	GO:0016311	0.809181	4.6875	2.21	+	5.44	6.89e-06	0.0119
G protein-coupled receptor signaling pathway	GO:0007186	1.72135	7.42188	4.69	+	4.05	7.49e-07	0.00258
neuropeptide signaling pathway	GO:0007218	0.529645	4.6875	1.44	+	8.31	1.52e-07	0.00105

## Sheet: Cell component
GO_term	GO_id	Brain (%)	Targets (%)	Expected	over/under	fold Enrichment	raw P-value	FDR
extracellular region	GO:0005576	3.85464	0.367809	10.51	+	2.38	8.87e-05	0.104
intracellular membrane-bounded organelle	GO:0043231	31.0578	0.86803	84.68	-	0.7	9.63e-05	0.0566
exocytic vesicle membrane	GO:0099501	0.161836	0.0735619	0.44	+	11.33	0.000248	0.0486
extracellular space	GO:0005615	2.16272	0.25011	5.9	+	2.88	0.000156	0.046
organelle	GO:0043226	37.8991	1.14757	103.34	-	0.75	0.000117	0.0458
synaptic vesicle membrane	GO:0030672	0.147124	0.0735619	0.4	+	12.46	0.000176	0.0414
